# Supplementary material for: Uncovering the BIN1-SH3 interactome underpinning centronuclear myopathy
Source: eLife. 2024 Jul 12;13:RP95397. doi: 10.7554/eLife.95397 (PMC11245310; doi:10.7554/eLife.95397)
Supplement: Supplementary file 1. — Each sheet contains the results of a single experiment performed with a given bait. Significant partners have numerical values in the “pKdsign” column. [file elife-95397-supp1.xlsx]

## Sheet: BIN1_nHU_Exploris
-LOG(P-Value)	Difference log2	Ratio BIN1/MBP	Accession	Contains putative PxxP?	Description	Gene Name	BI	pKd	threshold	pKdsign	Coverage [%]	# Peptides	# PSMs	# Unique Peptides	# AAs	MW [kDa]	calc. pI	XIC MBP_a rep1	XIC MBP_a rep2	XIC MBP_a rep3	XIC BIN1 rep1	XIC BIN1 rep2	XIC BIN1 rep3	XIC MBP_b rep1	XIC MBP_b rep2	XIC MBP_b rep3
0.821408	-0.380278	0.76829	A0A096LP01	FALSE	Small integral membrane protein 26 OS=Homo sapiens OX=9606	SMIM26	0.23171	4.47942	6.29306	N/D	9	1	4	1	95	10.9	6.7	-4.48056	-4.37405	-4.74416	-4.77477	-4.96158	-4.35486	-3.96962	-4.48772	-3.84463
0.495339	0.0699773	1.0497	A0A0B4J2F0	FALSE	Protein PIGBOS1 OS=Homo sapiens OX=9606	PIGBOS1	-0.0497002	N/D	N/D	N/D	19	1	18	1	54	6.3	8.5	-3.72889	-3.52501	-3.52012	-3.62738	-3.45467	-3.50461	-3.7056	-3.54166	-3.57191
0.821684	-0.266985	0.831054	A0A0U1RRE5	TRUE	Negative regulator of P-body association OS=Homo sapiens OX=9606	NBDY	0.168946	4.30812	12.7962	N/D	40	1	26	1	68	7	9.42	-3.21813	-3.70329	-3.13832	-3.5705	-3.64606	-3.50319	-3.22414	-3.56947	-2.98424
0.893141	0.306133	1.23639	A0A0U1RRL7	FALSE	Protein MMP24OS OS=Homo sapiens OX=9606	MMP24OS	-0.23639	N/D	N/D	N/D	37	1	23	1	71	7.7	4.72	-4.43826	-3.72217	-3.94745	-3.66055	-3.73884	-3.51445	-4.0143	-3.60381	-3.93848
0.256258	0.102204	1.07341	A0A2R8Y4L2	FALSE	Heterogeneous nuclear ribonucleoprotein A1-like 3 OS=Homo sapiens OX=9606	HNRNPA1L3	-0.0734119	N/D	N/D	N/D	69	22	3125	1	275	29.2	9.48	-0.0150089	0.188736	0.339005	0.390876	0.50265	0.557652	0.44395	0.630241	0.702209
2.02161	0.186405	1.13792	A0AVT1	TRUE	Ubiquitin-like modifier-activating enzyme 6 OS=Homo sapiens OX=9606	UBA6	-0.137925	N/D	N/D	N/D	39	35	968	35	1052	117.9	6.14	2.94506	2.7317	2.8685	3.07506	3.01437	3.05612	2.81116	2.85238	2.96385
0.0505693	-0.00429742	0.997026	A0FGR8	FALSE	Extended synaptotagmin-2 OS=Homo sapiens OX=9606	ESYT2	0.00297431	2.47468	N/D	N/D	31	25	909	25	921	102.3	9.26	3.05446	3.0423	2.98446	3.01649	2.97967	2.96564	2.94122	2.9474	2.97956
0.698713	0.078623	1.05601	A0JLT2	TRUE	Mediator of RNA polymerase II transcription subunit 19 OS=Homo sapiens OX=9606	MED19	-0.0560096	N/D	N/D	N/D	9	2	5	2	244	26.3	9.82	0.0329304	-0.0334206	-0.0735855	0.0933638	0.100205	-0.0996838	-0.0824308	-0.128546	0.00108528
0.520636	-0.0932256	0.937424	A0MZ66	TRUE	Shootin-1 OS=Homo sapiens OX=9606	SHTN1	0.0625755	3.82447	N/D	N/D	18	10	79	10	631	71.6	5.33	-1.39538	-1.25712	-1.61065	-1.65672	-1.50801	-1.53822	-1.58414	-1.4916	-1.50766
0.445534	-0.388436	0.763958	A0PJZ3	TRUE	Glucoside xylosyltransferase 2 OS=Homo sapiens OX=9606	GXYLT2	0.236042	4.48992	6.09765	N/D	5	2	7	2	443	51	9.77	-3.73534	-3.96439	-4.15778	-4.53166	-4.83561	-4.66038	-5.53252	-3.9069	-4.42774
0.186867	-0.0499883	0.965944	A1L0T0	FALSE	2-hydroxyacyl-CoA lyase 2 OS=Homo sapiens OX=9606	ILVBL	0.0340558	3.54724	N/D	N/D	20	9	117	9	632	67.8	8.15	-0.549475	-0.480352	-0.443096	-0.838244	-0.504943	-0.516275	-0.814504	-0.559179	-0.57239
0.0920099	0.0878218	1.06276	A1L188	FALSE	NADH dehydrogenase [ubiquinone] 1 alpha subcomplex assembly factor 8 OS=Homo sapiens OX=9606	NDUFAF8	-0.0627644	N/D	N/D	N/D	43	3	10	3	74	7.8	9.32	-4.03598	-4.05681	-3.26192	-3.88455	-3.11809	-4.16752	-3.83973	-3.24031	-4.4325
2.08308	-1.23458	0.424966	A1X283	TRUE	SH3 and PX domain-containing protein 2B OS=Homo sapiens OX=9606	SH3PXD2B	0.575034	5.13134	2.24824	N/D	2	2	10	2	911	101.5	8.69	-3.42739	-3.39156	-3.21376	-4.87474	-5.30236	-3.6253	-3.40463	-3.5531	-3.2069
0.476342	-0.0243955	0.983233	A2RRP1	FALSE	NBAS subunit of NRZ tethering complex OS=Homo sapiens OX=9606	NBAS	0.0167675	3.23181	N/D	N/D	22	46	708	46	2371	268.4	5.96	1.59295	1.67578	1.63569	1.62138	1.607	1.60353	1.65656	1.66611	1.5831
0.319039	-0.228933	0.853266	A2RTX5	FALSE	Threonine--tRNA ligase 2, cytoplasmic OS=Homo sapiens OX=9606	TARS3	0.146734	4.23545	21.7363	N/D	9	6	94	3	802	92.6	6.05	-3.78985	-4.15357	-4.77418	-4.82472	-4.06827	-4.1572	-4.39834	-3.52135	-4.08949
0.928114	0.420325	1.33823	A2RU67	FALSE	Protein FAM234B OS=Homo sapiens OX=9606	FAM234B	-0.338229	N/D	N/D	N/D	5	2	16	2	622	67	5.02	-3.51757	-4.18995	-4.35499	-3.63976	-3.5214	-3.46203	-3.65742	-3.66478	-4.38362
0.0362241	0.00318988	1.00221	A2VDJ0	FALSE	Transmembrane protein 131-like OS=Homo sapiens OX=9606	TMEM131L	-0.0022135	N/D	N/D	N/D	9	14	200	14	1609	179.2	6.86	1.081	1.03153	1.03623	1.05243	1.12978	1.06112	1.13782	1.06097	1.11998
2.67817	0.108106	1.07781	A3KMH1	FALSE	von Willebrand factor A domain-containing protein 8 OS=Homo sapiens OX=9606	VWA8	-0.077812	N/D	N/D	N/D	25	43	475	43	1905	214.7	7.4	4.08608	4.05717	4.06744	4.11606	4.20376	4.16217	4.02425	4.01844	4.06196
0.432996	-0.0339669	0.976731	A3KN83	FALSE	Protein strawberry notch homolog 1 OS=Homo sapiens OX=9606	SBNO1	0.023269	3.377	N/D	N/D	29	29	674	29	1393	154.2	7.88	1.71311	1.71135	1.73425	1.78703	1.6682	1.62951	1.71498	1.78439	1.71519
0.0780248	-0.00873264	0.993965	A4D1E9	FALSE	GTP-binding protein 10 OS=Homo sapiens OX=9606	GTPBP10	0.00603472	2.78329	N/D	N/D	19	7	89	7	387	42.9	9.03	1.03445	0.984161	1.08797	1.0007	1.0743	0.953468	1.037	1.03964	0.926115
0.629942	0.170587	1.12552	A4D1P6	FALSE	WD repeat-containing protein 91 OS=Homo sapiens OX=9606	WDR91	-0.125516	N/D	N/D	N/D	19	11	99	11	747	83.3	6.58	-1.74763	-1.32966	-1.46326	-1.20527	-1.37176	-1.32798	-1.3166	-1.25927	-1.71714
0.357089	0.12657	1.0917	A4D1U4	TRUE	DENN domain-containing protein 11 OS=Homo sapiens OX=9606	DENND11	-0.0916952	N/D	N/D	N/D	2	1	14	1	455	51.4	5.31	-4.91994	-4.98397	-5.57412	-5.08128	-4.90041	-4.86204	-4.95054	-4.98865	-5.02967
0.542052	0.608675	1.52486	A5PLL7	FALSE	Plasmanylethanolamine desaturase OS=Homo sapiens OX=9606	PEDS1	-0.524858	N/D	N/D	N/D	6	1	2	1	270	31.1	6.83	-5.00867	-3.85265	-6.47541	-4.69538	-4.86229	-4.62755	-5.61992	-5.29467	-5.77119
1.43204	-0.225773	0.855137	A5PLN9	FALSE	Trafficking protein particle complex subunit 13 OS=Homo sapiens OX=9606	TRAPPC13	0.144863	4.22892	23.1469	N/D	28	8	118	8	417	46.5	5.6	0.566738	0.430128	0.651581	0.217793	0.262738	0.168474	0.266086	0.40329	0.334827
0.331035	0.0169298	1.0118	A5YKK6	TRUE	CCR4-NOT transcription complex subunit 1 OS=Homo sapiens OX=9606	CNOT1	-0.011804	N/D	N/D	N/D	26	57	1904	57	2376	266.8	7.11	3.41908	3.42897	3.41439	3.42403	3.39532	3.43184	3.39203	3.33368	3.41264
1.09693	0.143349	1.10447	A6NDG6	FALSE	Glycerol-3-phosphate phosphatase OS=Homo sapiens OX=9606	PGP	-0.104466	N/D	N/D	N/D	32	9	304	9	321	34	6.14	0.73481	0.878819	0.948652	0.956059	1.00539	0.913204	0.783807	0.896769	0.646362
0.212231	-0.0310947	0.978677	A6NDU8	FALSE	RAB7A-interacting MON1-CCZ1 complex subunit 1 OS=Homo sapiens OX=9606	RIMOC1	0.0213226	3.3382	N/D	N/D	29	7	151	7	294	33.6	5.26	-1.25713	-1.4521	-1.37106	-1.45356	-1.46105	-1.4367	-1.48961	-1.53516	-1.41099
0.191511	-0.0333769	0.97713	A6NED2	FALSE	RCC1 domain-containing protein 1 OS=Homo sapiens OX=9606	RCCD1	0.0228695	3.3693	N/D	N/D	16	5	60	5	376	40.1	5.27	-1.92505	-1.88155	-1.87512	-1.86915	-1.92741	-1.72911	-1.74192	-1.70511	-1.72234
0.609832	-0.0920119	0.938213	A6NFI3	TRUE	Zinc finger protein 316 OS=Homo sapiens OX=9606	ZNF316	0.0617866	3.81859	N/D	N/D	7	6	59	5	1004	108.4	5.31	-3.0597	-2.89615	-2.79217	-3.00464	-2.91339	-3.16887	-2.97294	-2.92893	-2.97185
8.15519	-1.69719	0.308387	A6NHR9	TRUE	Structural maintenance of chromosomes flexible hinge domain-containing protein 1 OS=Homo sapiens OX=9606	SMCHD1	0.691613	5.35077	1.95911	5.35077	35	64	1219	64	2005	226.2	7.3	2.934	2.9339	2.89406	1.36581	1.23083	1.10072	2.97105	2.91017	2.93465
0.146251	0.0448384	1.03157	A6NHX0	FALSE	Cytosolic arginine sensor for mTORC1 subunit 2 OS=Homo sapiens OX=9606	CASTOR2	-0.0315676	N/D	N/D	N/D	10	3	56	2	329	36	5.16	-2.73747	-2.99714	-2.98029	-2.86641	-2.74056	-3.04685	-2.72783	-3.17513	-2.95883
0.737231	0.0399356	1.02807	A6NIH7	FALSE	Protein unc-119 homolog B OS=Homo sapiens OX=9606	UNC119B	-0.0280679	N/D	N/D	N/D	45	9	262	8	251	28.1	5.68	0.0205994	-0.0109749	0.0333652	0.0592966	-0.00475216	0.0213585	-0.0788717	-0.0363426	-0.015583
0.355785	-0.0846108	0.943039	A6NJ78	FALSE	12S rRNA N4-methylcytidine (m4C) methyltransferase OS=Homo sapiens OX=9606	METTL15	0.0569611	3.78105	N/D	N/D	10	4	58	4	407	46.1	8.62	0.0482159	-0.150068	-0.277784	-0.155913	-0.247302	-0.298912	-0.102986	-0.401014	-0.0129528
3.32318	-0.551665	0.682232	A6NKD9	TRUE	Coiled-coil domain-containing protein 85C OS=Homo sapiens OX=9606	CCDC85C	0.317768	4.66818	3.99059	N/D	2	1	3	1	419	45.2	6.96	-5.09524	-5.24892	-5.19574	-5.73593	-5.87653	-5.84436	-5.32377	-5.51672	-5.22326
0.0644331	0.03159	1.02214	A6NKF1	FALSE	SAC3 domain-containing protein 1 OS=Homo sapiens OX=9606	SAC3D1	-0.022138	N/D	N/D	N/D	17	5	77	5	404	43.5	8.69	0.0740089	0.11454	0.0276299	0.403081	0.369451	0.334814	0.633361	0.59141	0.584202
3.51666	-1.97515	0.254344	A8CG34	TRUE	Nuclear envelope pore membrane protein POM 121C OS=Homo sapiens OX=9606	POM121C	0.745656	5.46712	1.85706	5.46712	9	7	104	2	1229	125	10.37	-2.87485	-2.75736	-3.28429	-5.51615	-4.10516	-5.08093	-2.91033	-3.00865	-2.71812
0.467027	0.0785232	1.05594	A8K2U0	FALSE	Alpha-2-macroglobulin-like protein 1 OS=Homo sapiens OX=9606	A2ML1	-0.0559366	N/D	N/D	N/D	2	2	15	2	1454	161	5.73	0.147837	0.188751	0.115562	0.177873	0.0428438	0.235786	0.117656	-0.101757	-0.0261822
0.361023	0.215836	1.16138	A8MT69	FALSE	Centromere protein X OS=Homo sapiens OX=9606	CENPX	-0.161377	N/D	N/D	N/D	32	3	49	3	81	9	5.9	-3.03542	-2.67261	-2.34441	-2.08213	-1.89641	-2.71637	-2.26623	-2.22859	-2.13758
0.64762	0.261055	1.19835	A8MUU1	FALSE	Putative fatty acid-binding protein 5-like protein 3 OS=Homo sapiens OX=9606	FABP5P3	-0.198355	N/D	N/D	N/D	22	2	165	1	101	11.3	7.8	-4.08507	-4.32563	-4.53518	-4.24	-4.22447	-4.28771	-4.67804	-5.04153	-4.40526
0.0846991	0.146323	1.10675	A8MW92	TRUE	PHD finger protein 20-like protein 1 OS=Homo sapiens OX=9606	PHF20L1	-0.106745	N/D	N/D	N/D	1	1	6	1	1017	114.9	6.83	-4.20986	-6.0492	-3.41725	-4.57651	-4.74149	-4.5489	-4.40686	-6.01383	-4.51476
0.131646	-0.0424285	0.971019	A9UHW6	FALSE	MIF4G domain-containing protein OS=Homo sapiens OX=9606	MIF4GD	0.0289809	3.47488	N/D	N/D	31	6	92	6	222	25.4	5.33	-1.70672	-1.62687	-1.33239	-1.53742	-1.38354	-1.86851	-1.494	-1.54306	-1.62133
1.83578	0.0981612	1.07041	B0I1T2	FALSE	Unconventional myosin-Ig OS=Homo sapiens OX=9606	MYO1G	-0.0704083	N/D	N/D	N/D	46	36	1409	34	1018	116.4	8.73	3.84396	3.71362	3.7332	3.8541	3.90237	3.8324	3.78376	3.76263	3.75161
1.30612	1.30992	2.47928	B7ZAP0	FALSE	Rab GTPase-activating protein 1-like, isoform 10 OS=Homo sapiens OX=9606	RABGAP1L	-1.47928	N/D	N/D	N/D	8	2	3	1	253	29	5.33	-5.04548	-6.61995	-4.79441	-3.50291	-4.01947	-4.10776	-5.3507	-5.43979	-3.8695
0.466519	-0.173792	0.886509	C9J7I0	FALSE	UBAP1-MVB12-associated (UMA)-domain containing protein 1 OS=Homo sapiens OX=9606	UMAD1	0.113491	4.10728	N/D	N/D	10	1	7	1	137	15.2	4.48	-5.36829	-5.03481	-5.46348	-5.47939	-5.11039	-5.64468	-4.90765	-5.43292	-5.21903
0.70152	-0.0387648	0.973488	C9JLW8	FALSE	Mapk-regulated corepressor-interacting protein 1 OS=Homo sapiens OX=9606	MCRIP1	0.0265119	3.43511	N/D	N/D	58	5	134	5	97	10.9	9.41	1.25032	1.32109	1.21271	1.26034	1.2489	1.19205	1.30337	1.25991	1.28775
3.79569	0.122451	1.08858	E9PRG8	FALSE	Uncharacterized protein C11orf98 OS=Homo sapiens OX=9606	C11orf98	-0.0885829	N/D	N/D	N/D	28	3	151	3	123	14.2	11.53	0.208881	0.236937	0.19161	0.377612	0.337968	0.341833	0.240943	0.24951	0.252237
0.132604	-0.0206765	0.98577	H7BZ55	TRUE	Ciliary rootlet coiled-coil protein 2 OS=Homo sapiens OX=9606	CROCC2	0.0142296	3.15942	N/D	N/D	2	3	9	2	1653	185.5	5.5	-0.797897	-0.871311	-0.8426	-0.694798	-0.923593	-0.904148	-0.864453	-0.829943	-0.714815
0.299023	0.077203	1.05497	L0R6Q1	FALSE	SLC35A4 upstream open reading frame protein OS=Homo sapiens OX=9606	SLC35A4	-0.0549707	N/D	N/D	N/D	47	4	157	4	103	11.1	8.1	0.613073	0.355778	0.663877	0.794847	0.475081	0.470804	0.610179	0.389299	0.38604
0.239721	0.0372043	1.02612	L0R819	FALSE	ASNSD1 upstream open reading frame protein OS=Homo sapiens OX=9606	ASDURF	-0.0261234	N/D	N/D	N/D	71	7	127	7	96	11.2	8.88	-0.584669	-0.594662	-0.685194	-0.504678	-0.602603	-0.477562	-0.48998	-0.624329	-0.414078
0.475449	-0.0675635	0.954248	L0R8F8	FALSE	MIEF1 upstream open reading frame protein OS=Homo sapiens OX=9606	MIEF1	0.0457518	3.68075	N/D	N/D	40	3	63	3	70	8.4	10.58	-1.05289	-0.937561	-0.835598	-0.937385	-1.03244	-1.15148	-0.935601	-1.04799	-1.02759
1.76789	0.269971	1.20578	O00115	TRUE	Deoxyribonuclease-2-alpha OS=Homo sapiens OX=9606	DNASE2	-0.205783	N/D	N/D	N/D	17	6	127	6	360	39.6	8.05	-0.325886	-0.600193	-0.637362	-0.206676	-0.260356	-0.201654	-0.35679	-0.410725	-0.626242
0.987444	0.137475	1.09998	O00116	FALSE	Alkyldihydroxyacetonephosphate synthase, peroxisomal OS=Homo sapiens OX=9606	AGPS	-0.0999784	N/D	N/D	N/D	37	19	536	19	658	72.9	7.34	1.95729	2.04162	2.19663	2.30526	2.21011	2.27937	2.29794	2.12769	2.14348
0.831637	-0.511388	0.701547	O00124	TRUE	UBX domain-containing protein 8 OS=Homo sapiens OX=9606	UBXN8	0.298453	4.62882	4.31761	N/D	6	1	15	1	270	30.5	7.78	-5.52038	-5.6211	-5.62424	-6.98438	-5.39845	-5.86758	-5.38507	-5.63311	-5.6486
6.11433	-0.274718	0.826612	O00139	FALSE	Kinesin-like protein KIF2A OS=Homo sapiens OX=9606	KIF2A	0.173388	4.32172	11.8577	N/D	43	25	838	24	706	79.9	6.68	2.81331	2.84617	2.82029	2.59757	2.52116	2.5458	2.84503	2.82801	2.82453
2.38997	0.173221	1.12757	O00148	TRUE	ATP-dependent RNA helicase DDX39A OS=Homo sapiens OX=9606	DDX39A	-0.127573	N/D	N/D	N/D	56	20	1520	9	427	49.1	5.68	2.59488	2.61937	2.62435	2.89805	2.81102	2.72014	2.61844	2.70938	2.65268
0.796299	0.254456	1.19289	O00151	TRUE	PDZ and LIM domain protein 1 OS=Homo sapiens OX=9606	PDLIM1	-0.192886	N/D	N/D	N/D	39	10	308	10	329	36	7.02	1.21462	1.12946	1.19591	1.30052	1.30023	1.21817	0.663415	1.2235	0.684216
3.0042	0.118859	1.08588	O00154	FALSE	Cytosolic acyl coenzyme A thioester hydrolase OS=Homo sapiens OX=9606	ACOT7	-0.0858758	N/D	N/D	N/D	64	18	1328	18	380	41.8	8.54	4.67869	4.69292	4.68955	4.75359	4.79676	4.78282	4.61731	4.61971	4.65501
1.85725	0.0623962	1.0442	O00161	FALSE	Synaptosomal-associated protein 23 OS=Homo sapiens OX=9606	SNAP23	-0.0441987	N/D	N/D	N/D	68	12	332	12	211	23.3	5.01	1.86974	1.81528	1.81594	1.92371	1.90576	1.87125	1.86951	1.84441	1.81217
0.464617	-0.042522	0.970956	O00165	TRUE	HCLS1-associated protein X-1 OS=Homo sapiens OX=9606	HAX1	0.0290439	3.47585	N/D	N/D	50	9	351	9	279	31.6	4.92	0.883242	0.921154	0.821007	0.788447	0.754966	0.792717	0.740684	0.777893	0.783413
1.7651	0.156735	1.11476	O00170	FALSE	AH receptor-interacting protein OS=Homo sapiens OX=9606	AIP	-0.114761	N/D	N/D	N/D	62	16	794	16	330	37.6	6.42	4.11364	3.94658	4.04548	4.2326	4.20652	4.10789	4.10305	3.99425	3.95062
0.0789942	0.0154395	1.01076	O00178	FALSE	GTP-binding protein 1 OS=Homo sapiens OX=9606	GTPBP1	-0.0107593	N/D	N/D	N/D	30	12	228	12	669	72.4	8.34	0.306362	0.422222	0.452394	0.572013	0.270032	0.338991	0.345487	0.314848	0.428122
0.278194	0.0690707	1.04904	O00182	FALSE	Galectin-9 OS=Homo sapiens OX=9606	LGALS9	-0.0490407	N/D	N/D	N/D	37	10	358	6	355	39.5	9.17	0.516376	0.842754	0.83058	0.753938	0.594926	0.784294	0.625634	0.456833	0.579714
0.274249	0.0564787	1.03992	O00186	FALSE	Syntaxin-binding protein 3 OS=Homo sapiens OX=9606	STXBP3	-0.0399244	N/D	N/D	N/D	17	10	180	10	592	67.7	7.8	-0.833094	-0.773851	-0.567398	-0.701848	-0.667611	-0.700029	-0.965264	-0.634739	-0.703503
0.0805471	-0.0728809	0.950738	O00189	FALSE	AP-4 complex subunit mu-1 OS=Homo sapiens OX=9606	AP4M1	0.0492624	3.71446	N/D	N/D	11	5	49	5	453	49.9	7.2	-1.89016	-2.8219	-2.35667	-2.07054	-2.36615	-3.13404	-2.73915	-2.02194	-2.87435
0.0978051	0.0131771	1.00918	O00193	FALSE	Small acidic protein OS=Homo sapiens OX=9606	SMAP	-0.00917549	N/D	N/D	N/D	38	8	298	8	183	20.3	4.72	2.46819	2.61975	2.65326	2.55865	2.67689	2.54609	2.60101	2.616	2.526
0.175088	0.171504	1.12623	O00203	FALSE	AP-3 complex subunit beta-1 OS=Homo sapiens OX=9606	AP3B1	-0.126232	N/D	N/D	N/D	3	3	12	3	1094	121.2	6.04	-5.21483	-3.63716	-3.72901	-3.86901	-3.62862	-3.77258	-3.8226	-3.58068	-3.58517
4.16167	0.183356	1.13552	O00214	TRUE	Galectin-8 OS=Homo sapiens OX=9606	LGALS8	-0.135522	N/D	N/D	N/D	27	9	199	9	317	35.8	8.25	-0.613945	-0.634939	-0.599669	-0.411805	-0.441657	-0.404758	-0.603147	-0.537851	-0.627028
0.221888	0.0299319	1.02096	O00217	FALSE	NADH dehydrogenase [ubiquinone] iron-sulfur protein 8, mitochondrial OS=Homo sapiens OX=9606	NDUFS8	-0.0209639	N/D	N/D	N/D	23	4	111	4	210	23.7	6.34	-1.04716	-1.21176	-1.12381	-1.02251	-1.18121	-1.1352	-1.17994	-1.22665	-1.06811
2.89933	-0.725277	0.604881	O00221	TRUE	NF-kappa-B inhibitor epsilon OS=Homo sapiens OX=9606	NFKBIE	0.395119	4.81506	3.13393	N/D	9	2	8	2	500	52.8	6.68	-4.48561	-4.47664	-4.38849	-5.21522	-5.43976	-4.75842	-4.45183	-4.27055	-4.402
0.0652996	-0.00512107	0.996457	O00231	FALSE	26S proteasome non-ATPase regulatory subunit 11 OS=Homo sapiens OX=9606	PSMD11	0.00354336	2.55096	N/D	N/D	54	26	1147	26	422	47.4	6.48	4.93892	4.92997	4.92143	4.92193	4.86035	4.99198	4.91258	4.90847	4.96787
1.20115	0.0771918	1.05496	O00232	FALSE	26S proteasome non-ATPase regulatory subunit 12 OS=Homo sapiens OX=9606	PSMD12	-0.0549626	N/D	N/D	N/D	41	20	764	20	456	52.9	7.65	3.60266	3.59195	3.52013	3.63029	3.66006	3.73552	3.6169	3.59051	3.66643
3.2078	0.15518	1.11356	O00233	FALSE	26S proteasome non-ATPase regulatory subunit 9 OS=Homo sapiens OX=9606	PSMD9	-0.11356	N/D	N/D	N/D	36	8	545	8	223	24.7	6.95	2.46297	2.40148	2.44267	2.61259	2.59929	2.65556	2.49074	2.50537	2.50058
2.81563	0.379953	1.3013	O00244	FALSE	Copper transport protein ATOX1 OS=Homo sapiens OX=9606	ATOX1	-0.301299	N/D	N/D	N/D	40	4	153	4	68	7.4	7.24	0.568651	0.526333	0.445215	0.965377	1.00764	0.994818	0.699943	0.618153	0.797657
0.989294	-0.191723	0.875559	O00255	TRUE	Menin OS=Homo sapiens OX=9606	MEN1	0.124441	4.15268	86.6022	N/D	15	9	112	9	615	68	6.55	-1.3709	-1.30834	-1.27642	-1.71838	-1.26955	-1.35164	-1.16129	-1.1797	-1.23216
0.893123	0.0324655	1.02276	O00257	TRUE	E3 SUMO-protein ligase CBX4 OS=Homo sapiens OX=9606	CBX4	-0.0227585	N/D	N/D	N/D	20	10	126	10	560	61.3	9.36	-0.273985	-0.272125	-0.346958	-0.2877	-0.259694	-0.282461	-0.319404	-0.327477	-0.314554
1.50517	-0.147029	0.903108	O00258	FALSE	Guided entry of tail-anchored proteins factor 1 OS=Homo sapiens OX=9606	GET1	0.0968919	4.03055	N/D	N/D	8	2	43	2	174	19.8	9.67	-2.26999	-2.16487	-2.3247	-2.30238	-2.40775	-2.48238	-2.23608	-2.3315	-2.1757
3.26049	0.118733	1.08578	O00264	FALSE	Membrane-associated progesterone receptor component 1 OS=Homo sapiens OX=9606	PGRMC1	-0.0857808	N/D	N/D	N/D	36	9	298	8	195	21.7	4.7	1.3854	1.35862	1.38481	1.51192	1.53239	1.48233	1.41858	1.36285	1.43063
1.29602	0.0730373	1.05193	O00267	TRUE	Transcription elongation factor SPT5 OS=Homo sapiens OX=9606	SUPT5H	-0.051929	N/D	N/D	N/D	41	42	1176	42	1087	120.9	5.06	3.3546	3.32971	3.37446	3.3804	3.37823	3.40405	3.23443	3.28002	3.31392
0.763877	0.196461	1.14588	O00268	TRUE	Transcription initiation factor TFIID subunit 4 OS=Homo sapiens OX=9606	TAF4	-0.145884	N/D	N/D	N/D	17	13	162	13	1085	110	9.94	-0.593361	-0.302279	-0.171156	-0.122416	-0.197776	-0.451569	-0.463296	-0.520617	-0.671579
1.01452	0.109287	1.0787	O00273	FALSE	DNA fragmentation factor subunit alpha OS=Homo sapiens OX=9606	DFFA	-0.0786951	N/D	N/D	N/D	40	11	268	11	331	36.5	4.79	1.75334	1.76757	1.83594	1.77698	1.79213	1.99522	1.68341	1.68892	1.74376
0.312165	0.0602727	1.04266	O00287	FALSE	Regulatory factor X-associated protein OS=Homo sapiens OX=9606	RFXAP	-0.0426628	N/D	N/D	N/D	17	3	83	3	272	28.2	5.54	-1.88883	-1.93955	-1.87791	-1.72626	-1.80675	-1.71816	-1.87653	-1.6547	-1.62644
1.67652	0.0500045	1.03527	O00299	FALSE	Chloride intracellular channel protein 1 OS=Homo sapiens OX=9606	CLIC1	-0.0352681	N/D	N/D	N/D	57	12	608	12	241	26.9	5.17	3.9411	3.94297	3.92978	4.01006	4.00392	3.95626	3.97525	3.94131	3.91003
1.7915	0.097748	1.0701	O00303	FALSE	Eukaryotic translation initiation factor 3 subunit F OS=Homo sapiens OX=9606	EIF3F	-0.0701017	N/D	N/D	N/D	46	13	820	13	357	37.5	5.45	3.96097	4.03917	4.05352	4.04874	4.10503	4.10388	3.94081	3.94876	3.9856
0.472145	-0.081436	0.945116	O00308	FALSE	NEDD4-like E3 ubiquitin-protein ligase WWP2 OS=Homo sapiens OX=9606	WWP2	0.0548836	3.76396	N/D	N/D	8	7	46	5	870	98.9	7.12	-2.57619	-2.56181	-2.30299	-2.57749	-2.49196	-2.71886	-2.60868	-2.54673	-2.49159
0.259744	-0.08576	0.942288	O00311	FALSE	Cell division cycle 7-related protein kinase OS=Homo sapiens OX=9606	CDC7	0.057712	3.78708	N/D	N/D	10	5	13	5	574	63.8	8.73	-1.99634	-2.14998	-2.16085	-2.1856	-2.3972	-2.2432	-2.2059	-2.60114	-2.02324
0.775796	1.14314	2.20862	O00329	TRUE	Phosphatidylinositol 4,5-bisphosphate 3-kinase catalytic subunit delta isoform OS=Homo sapiens OX=9606	PIK3CD	-1.20862	N/D	N/D	N/D	2	2	2	2	1044	119.4	7.18	-7.66088	-4.69652	-6.66206	-5.12986	-3.81996	-4.9003	-5.51684	-5.047	-4.9758
1.90717	-0.107956	0.927902	O00330	FALSE	Pyruvate dehydrogenase protein X component, mitochondrial OS=Homo sapiens OX=9606	PDHX	0.0720983	3.89042	N/D	N/D	25	10	181	10	501	54.1	8.66	1.39324	1.36123	1.39487	1.28474	1.22245	1.22204	1.32572	1.26537	1.36577
0.0632168	-0.0108199	0.992528	O00399	FALSE	Dynactin subunit 6 OS=Homo sapiens OX=9606	DCTN6	0.00747174	2.87668	N/D	N/D	16	3	78	3	190	20.7	6.32	-0.962528	-1.08049	-0.970102	-1.10999	-0.95641	-1.11408	-0.996776	-1.12017	-1.16599
0.0516111	0.0353404	1.0248	O00400	TRUE	Acetyl-coenzyme A transporter 1 OS=Homo sapiens OX=9606	SLC33A1	-0.0247986	N/D	N/D	N/D	5	2	21	2	549	60.9	7.33	-3.35716	-3.87037	-3.96257	-3.83644	-4.00561	-4.09531	-4.52506	-4.25482	-4.1168
2.26701	0.142782	1.10403	O00410	FALSE	Importin-5 OS=Homo sapiens OX=9606	IPO5	-0.104032	N/D	N/D	N/D	47	39	1573	37	1097	123.6	4.94	4.69139	4.76821	4.69579	4.8315	4.81492	4.80907	4.58979	4.64084	4.66827
1.28033	0.123455	1.08934	O00411	TRUE	DNA-directed RNA polymerase, mitochondrial OS=Homo sapiens OX=9606	POLRMT	-0.0893402	N/D	N/D	N/D	21	17	179	17	1230	138.5	8.98	0.66478	0.607916	0.793875	0.871041	0.808801	0.877987	0.719872	0.74559	0.842897
0.263362	0.0504947	1.03562	O00418	FALSE	Eukaryotic elongation factor 2 kinase OS=Homo sapiens OX=9606	EEF2K	-0.03562	N/D	N/D	N/D	19	13	94	13	725	82.1	5.33	-0.960224	-0.958763	-1.1542	-0.957576	-0.854529	-0.996902	-0.860869	-1.12017	-0.866755
1.86433	-0.229735	0.852792	O00422	TRUE	Histone deacetylase complex subunit SAP18 OS=Homo sapiens OX=9606	SAP18	0.147208	4.23709	21.4067	N/D	59	11	300	11	153	17.6	9.35	2.38726	2.32611	2.36404	2.18357	2.30345	2.04822	2.34129	2.51231	2.51788
0.727386	0.0662847	1.04702	O00425	FALSE	Insulin-like growth factor 2 mRNA-binding protein 3 OS=Homo sapiens OX=9606	IGF2BP3	-0.0470168	N/D	N/D	N/D	37	19	702	17	579	63.7	8.87	3.53046	3.46159	3.4344	3.49385	3.4739	3.49887	3.4354	3.34895	3.32474
0.967962	0.0276796	1.01937	O00429	TRUE	Dynamin-1-like protein OS=Homo sapiens OX=9606	DNM1L	-0.0193713	N/D	N/D	N/D	44	32	1025	32	736	81.8	6.81	2.92783	2.91302	2.92345	2.98872	2.92411	2.9692	2.94318	2.94101	2.94949
0.325669	-0.0341372	0.976616	O00442	FALSE	RNA 3'-terminal phosphate cyclase OS=Homo sapiens OX=9606	RTCA	0.0233844	3.3792	N/D	N/D	15	4	115	4	366	39.3	7.85	3.78075	3.79886	3.64492	3.71835	3.69544	3.7072	3.82713	3.73418	3.66096
0.687472	-0.211906	0.863396	O00443	FALSE	Phosphatidylinositol 4-phosphate 3-kinase C2 domain-containing subunit alpha OS=Homo sapiens OX=9606	PIK3C2A	0.136604	4.19925	32.6424	N/D	7	11	75	10	1686	190.6	8.02	-1.60482	-1.25138	-1.23178	-1.48985	-1.60222	-1.76307	-1.80163	-1.27412	-1.27514
0.41061	0.28336	1.21703	O00458	FALSE	Interferon-related developmental regulator 1 OS=Homo sapiens OX=9606	IFRD1	-0.217026	N/D	N/D	N/D	7	2	15	2	451	50.2	7.18	-5.20934	-5.15099	-5.33603	-4.36447	-4.92691	-4.56672	-4.74921	-4.96099	-4.0098
0.395768	-0.118819	0.920941	O00462	FALSE	Beta-mannosidase OS=Homo sapiens OX=9606	MANBA	0.0790586	3.93372	N/D	N/D	2	2	34	1	879	100.8	5.52	-4.48393	-4.4587	-4.69285	-4.62322	-4.50825	-5.07329	-4.70248	-4.62252	-4.73615
0.546655	-0.293648	0.815837	O00463	FALSE	TNF receptor-associated factor 5 OS=Homo sapiens OX=9606	TRAF5	0.184163	4.3536	10.0991	N/D	5	3	13	3	557	64.4	7.43	-3.67481	-3.67318	-3.70274	-3.53486	-4.74537	-3.70952	-3.71683	-3.86247	-3.5876
0.861643	0.100929	1.07246	O00471	FALSE	Exocyst complex component 5 OS=Homo sapiens OX=9606	EXOC5	-0.0724641	N/D	N/D	N/D	30	21	456	21	708	81.8	6.71	0.863775	0.927462	0.822388	1.13755	0.981326	0.846235	0.890582	0.930038	0.890396
1.15339	-0.0765545	0.94832	O00483	FALSE	Cytochrome c oxidase subunit NDUFA4 OS=Homo sapiens OX=9606	NDUFA4	0.0516802	3.73637	N/D	N/D	22	2	142	2	81	9.4	9.38	0.335388	0.307449	0.34621	0.286	0.181251	0.227438	0.21086	0.311764	0.337032
4.18719	0.35042	1.27493	O00487	FALSE	26S proteasome non-ATPase regulatory subunit 14 OS=Homo sapiens OX=9606	PSMD14	-0.274932	N/D	N/D	N/D	35	10	521	10	310	34.6	6.52	2.59796	2.53724	2.55225	2.8853	2.93203	2.8222	2.55431	2.51481	2.41996
0.919625	-0.117214	0.921966	O00488	FALSE	Zinc finger protein 593 OS=Homo sapiens OX=9606	ZNF593	0.0780339	3.92757	N/D	N/D	47	4	60	4	134	15.2	9.82	-1.71693	-1.5938	-1.65906	-1.72354	-1.60251	-1.80692	-1.52865	-1.59959	-1.46462
13.1475	7.1983	146.861	O00499	TRUE	Myc box-dependent-interacting protein 1 OS=Homo sapiens OX=9606	BIN1	-145.861	N/D	N/D	N/D	14	9	451	8	593	64.7	5.06	1.34148	1.31781	1.33282	8.58554	8.57294	8.58527	1.51297	1.39554	1.39704
0.0987536	-0.0290802	0.980045	O00505	FALSE	Importin subunit alpha-4 OS=Homo sapiens OX=9606	KPNA3	0.0199551	3.30881	N/D	N/D	29	12	243	10	521	57.8	4.94	0.899269	0.493839	0.945343	0.82528	0.702483	0.896851	0.901568	0.858221	0.925468
1.22183	0.206597	1.15396	O00506	TRUE	Serine/threonine-protein kinase 25 OS=Homo sapiens OX=9606	STK25	-0.153963	N/D	N/D	N/D	13	5	142	1	426	48.1	6.74	-4.6552	-4.5509	-4.65232	-4.50473	-4.2247	-4.23364	-4.35746	-4.44787	-4.50198
0.363862	-0.475039	0.719448	O00507	FALSE	Probable ubiquitin carboxyl-terminal hydrolase FAF-Y OS=Homo sapiens OX=9606	USP9Y	0.280552	4.59101	4.68939	N/D	10	23	505	1	2555	290.9	5.86	-4.4611	-4.47194	-4.41828	-6.10982	-4.62755	-4.16006	-3.47883	-5.69546	-4.41901
0.182595	-0.104273	0.930274	O00512	TRUE	B-cell CLL/lymphoma 9 protein OS=Homo sapiens OX=9606	BCL9	0.0697264	3.87479	N/D	N/D	4	5	26	5	1426	149.2	8.91	-3.09829	-2.88143	-3.14087	-2.87003	-2.90438	-3.74325	-2.75626	-3.28941	-3.24342
1.71455	-0.575441	0.671081	O00522	FALSE	Krev interaction trapped protein 1 OS=Homo sapiens OX=9606	KRIT1	0.328919	4.69031	3.82882	N/D	2	2	11	2	736	84.3	8.41	-3.87785	-3.53909	-3.28857	-3.97159	-4.53731	-4.01393	-3.72926	-3.34131	-3.81693
1.13959	0.0662169	1.04697	O00541	FALSE	Pescadillo homolog OS=Homo sapiens OX=9606	PES1	-0.0469677	N/D	N/D	N/D	37	19	723	19	588	68	7.33	2.30017	2.35612	2.3389	2.35541	2.40688	2.33018	2.27836	2.22621	2.28786
0.71157	-0.369926	0.773822	O00559	FALSE	Receptor-binding cancer antigen expressed on SiSo cells OS=Homo sapiens OX=9606	EBAG9	0.226178	4.46581	6.56522	N/D	9	1	6	1	213	24.4	6.29	-4.25631	-4.68419	-4.15321	-4.48804	-4.17927	-5.19264	-4.45375	-3.99918	-3.95372
0.480135	-0.0304653	0.979104	O00560	FALSE	Syntenin-1 OS=Homo sapiens OX=9606	SDCBP	0.0208955	3.32922	N/D	N/D	29	5	134	5	298	32.4	7.53	-0.197126	-0.141497	-0.106983	-0.17204	-0.207862	-0.193535	-0.161723	-0.12335	-0.233402
0.918533	0.181091	1.13374	O00566	FALSE	U3 small nucleolar ribonucleoprotein protein MPP10 OS=Homo sapiens OX=9606	MPHOSPH10	-0.133741	N/D	N/D	N/D	20	11	305	11	681	78.8	4.86	0.829992	0.461447	0.740841	0.834998	0.892947	0.823778	0.769246	0.769907	0.445471
0.122499	-0.00627724	0.995658	O00567	FALSE	Nucleolar protein 56 OS=Homo sapiens OX=9606	NOP56	0.0043416	2.63954	N/D	N/D	55	32	1029	32	594	66	9.19	3.37428	3.38359	3.38822	3.3666	3.37913	3.32075	3.31927	3.35063	3.35463
1.24278	-0.0357579	0.975519	O00571	FALSE	ATP-dependent RNA helicase DDX3X OS=Homo sapiens OX=9606	DDX3X	0.0244808	3.39959	N/D	N/D	55	37	2466	36	662	73.2	7.18	4.6368	4.60285	4.60551	4.56082	4.59862	4.57659	4.60946	4.58438	4.6476
0.269593	0.115289	1.08319	O00584	FALSE	Ribonuclease T2 OS=Homo sapiens OX=9606	RNASET2	-0.0831919	N/D	N/D	N/D	9	2	50	2	256	29.5	7.08	-3.27523	-3.77658	-3.29561	-3.31326	-3.52888	-3.58669	-4.01512	-3.58759	-3.59926
0.0342369	0.0701414	1.04982	O00628	FALSE	Peroxisomal targeting signal 2 receptor OS=Homo sapiens OX=9606	PEX7	-0.0498196	N/D	N/D	N/D	10	2	17	2	323	35.9	5.73	-4.68464	-3.53804	-4.23312	-4.95242	-4.48231	-3.82751	-6.61631	-4.32239	-3.55083
0.248949	-0.0818016	0.944877	O00629	FALSE	Importin subunit alpha-3 OS=Homo sapiens OX=9606	KPNA4	0.055123	3.76596	N/D	N/D	25	11	285	9	521	57.9	4.96	0.774303	0.492346	0.123087	0.427958	0.432166	0.426197	0.496499	0.481943	0.695274
0.485139	0.242234	1.18282	O00635	FALSE	E3 ubiquitin-protein ligase TRIM38 OS=Homo sapiens OX=9606	TRIM38	-0.182823	N/D	N/D	N/D	8	3	14	3	465	53.4	7.02	-3.36596	-2.95654	-2.80233	-3.04322	-3.17221	-3.02585	-3.67792	-3.37183	-3.7614
0.118189	-0.0126017	0.991303	O00716	FALSE	Transcription factor E2F3 OS=Homo sapiens OX=9606	E2F3	0.00869679	2.94315	N/D	N/D	4	2	15	1	465	49.1	5.44	-1.19531	-1.32992	-1.31474	-1.29454	-1.30637	-1.32621	-1.39166	-1.27868	-1.26833
0.0396583	-0.00280937	0.998055	O00743	FALSE	Serine/threonine-protein phosphatase 6 catalytic subunit OS=Homo sapiens OX=9606	PPP6C	0.00194541	2.28986	N/D	N/D	28	8	403	8	305	35.1	5.69	1.86276	1.90916	1.86477	1.8755	1.86375	1.88657	1.93975	1.82298	1.86906
0.828483	0.122253	1.08843	O00746	FALSE	Nucleoside diphosphate kinase, mitochondrial OS=Homo sapiens OX=9606	NME4	-0.0884335	N/D	N/D	N/D	21	3	57	3	187	20.6	10.29	-2.45366	-2.24046	-2.31858	-2.1005	-2.40927	-2.15919	-2.38709	-2.34585	-2.3258
0.0895006	-0.0212429	0.985383	O00754	FALSE	Lysosomal alpha-mannosidase OS=Homo sapiens OX=9606	MAN2B1	0.0146166	3.17124	N/D	N/D	4	4	72	4	1011	113.7	7.28	-2.30191	-2.26318	-2.32783	-2.18029	-2.23117	-2.15895	-2.0351	-2.01805	-2.06727
1.35272	0.102672	1.07376	O00762	FALSE	Ubiquitin-conjugating enzyme E2 C OS=Homo sapiens OX=9606	UBE2C	-0.0737602	N/D	N/D	N/D	18	3	52	3	179	19.6	7.37	-1.48757	-1.37049	-1.40114	-1.22035	-1.33523	-1.40272	-1.42498	-1.4357	-1.41276
0.229436	-0.015485	0.989324	O00764	FALSE	Pyridoxal kinase OS=Homo sapiens OX=9606	PDXK	0.010676	3.03307	N/D	N/D	17	5	213	5	312	35.1	6.13	-0.0885429	-0.0680103	-0.0797024	-0.0382109	-0.144834	-0.151814	-0.12572	-0.11619	-0.0986404
0.859816	-0.105542	0.929456	O00767	FALSE	Stearoyl-CoA desaturase OS=Homo sapiens OX=9606	SCD	0.0705443	3.88023	N/D	N/D	17	4	146	4	359	41.5	9	0.277311	0.477081	0.519627	0.25738	0.323371	0.240004	0.359893	0.369596	0.271254
0.32834	0.0252306	1.01764	O14497	TRUE	AT-rich interactive domain-containing protein 1A OS=Homo sapiens OX=9606	ARID1A	-0.0176423	N/D	N/D	N/D	34	53	1639	51	2285	241.9	6.7	3.31413	3.27621	3.34206	3.40769	3.32983	3.36457	3.39243	3.32162	3.40635
0.245346	-0.0188244	0.987037	O14519	FALSE	Cyclin-dependent kinase 2-associated protein 1 OS=Homo sapiens OX=9606	CDK2AP1	0.0129633	3.11838	N/D	N/D	70	4	120	4	115	12.4	9.38	-0.869497	-0.798155	-0.817261	-0.880361	-0.845716	-0.814468	-0.762116	-0.895851	-0.825262
0.834171	0.0875017	1.06253	O14521	FALSE	Succinate dehydrogenase [ubiquinone] cytochrome b small subunit, mitochondrial OS=Homo sapiens OX=9606	SDHD	-0.0625286	N/D	N/D	N/D	11	2	91	2	159	17	8.63	-0.573126	-0.540016	-0.487356	-0.532119	-0.521234	-0.509956	-0.650167	-0.718904	-0.682058
0.561366	-0.204497	0.867841	O14523	FALSE	Phospholipid transfer protein C2CD2L OS=Homo sapiens OX=9606	C2CD2L	0.132159	4.18266	42.1216	N/D	13	4	41	4	706	76.1	7.69	-1.59505	-1.5896	-2.14041	-2.02245	-1.59496	-2.213	-1.65135	-1.77501	-1.68241
0.093803	0.0171107	1.01193	O14524	FALSE	Nuclear envelope integral membrane protein 1 OS=Homo sapiens OX=9606	NEMP1	-0.0119308	N/D	N/D	N/D	5	2	44	2	444	50.6	6.93	-3.47549	-3.56092	-3.35133	-3.37262	-3.46565	-3.42333	-3.48389	-3.48879	-3.26544
2.835	-0.980108	0.506942	O14526	FALSE	F-BAR domain only protein 1 OS=Homo sapiens OX=9606	FCHO1	0.493058	4.98794	2.54983	4.98794	9	7	49	7	889	96.8	6.96	-1.32729	-1.23746	-1.53979	-2.14172	-2.09862	-2.14285	-0.584479	-1.03628	-1.16043
2.1131	0.0721682	1.0513	O14530	FALSE	Thioredoxin domain-containing protein 9 OS=Homo sapiens OX=9606	TXNDC9	-0.0512955	N/D	N/D	N/D	30	7	329	7	226	26.5	5.88	1.07092	1.04125	1.0662	1.1733	1.15018	1.14183	1.10002	1.08803	1.1312
1.51311	-1.13554	0.455166	O14545	TRUE	TRAF-type zinc finger domain-containing protein 1 OS=Homo sapiens OX=9606	TRAFD1	0.544834	5.07809	2.34653	N/D	5	3	32	3	582	64.8	5.29	-3.15431	-3.15643	-3.12677	-5.05341	-4.91775	-3.68111	-3.383	-4.45268	-3.21813
0.574368	-0.0538729	0.963347	O14548	FALSE	Cytochrome c oxidase subunit 7A-related protein, mitochondrial OS=Homo sapiens OX=9606	COX7A2L	0.0366532	3.58033	N/D	N/D	19	2	14	2	114	12.6	9.42	-2.56849	-2.57755	-2.43396	-2.52253	-2.66225	-2.54971	-2.48052	-2.56865	-2.51657
0.678772	0.108802	1.07833	O14561	FALSE	Acyl carrier protein, mitochondrial OS=Homo sapiens OX=9606	NDUFAB1	-0.0783324	N/D	N/D	N/D	21	3	149	3	156	17.4	4.93	2.04216	1.90709	1.92158	2.0224	1.96642	1.8959	1.78414	1.71137	1.75029
0.660639	0.0842808	1.06016	O14562	FALSE	Ubiquitin domain-containing protein UBFD1 OS=Homo sapiens OX=9606	UBFD1	-0.0601591	N/D	N/D	N/D	35	7	162	7	309	33.4	5.77	1.2666	1.24581	1.2947	1.45162	1.25674	1.3317	1.36359	1.11192	1.29181
0.926646	-0.0671624	0.954514	O14578	TRUE	Citron Rho-interacting kinase OS=Homo sapiens OX=9606	CIT	0.0454864	3.6781	N/D	N/D	22	42	643	42	2027	231.3	6.57	1.9882	1.9935	1.9642	2.00035	1.95493	1.87524	1.98444	2.09819	2.03549
0.948992	0.21223	1.15848	O14579	FALSE	Coatomer subunit epsilon OS=Homo sapiens OX=9606	COPE	-0.158477	N/D	N/D	N/D	52	12	320	12	308	34.5	5.12	1.73417	2.16387	1.96545	2.35345	2.0306	2.2552	2.18958	1.99772	1.95432
0.564111	0.107969	1.07771	O14593	FALSE	DNA-binding protein RFXANK OS=Homo sapiens OX=9606	RFXANK	-0.0777103	N/D	N/D	N/D	4	1	29	1	260	28.1	4.55	-3.2039	-3.45725	-3.24399	-3.30389	-3.21519	-2.97183	-3.21151	-3.17824	-3.33476
0.517104	0.0652544	1.04627	O14602	FALSE	Eukaryotic translation initiation factor 1A, Y-chromosomal OS=Homo sapiens OX=9606	EIF1AY	-0.0462694	N/D	N/D	N/D	39	7	227	1	144	16.4	5.24	0.596968	0.638966	0.607409	0.864062	0.655093	0.673246	0.723733	0.663311	0.762892
1.22147	-0.130872	0.913279	O14617	TRUE	AP-3 complex subunit delta-1 OS=Homo sapiens OX=9606	AP3D1	0.0867207	3.97752	N/D	N/D	25	27	621	27	1153	130.1	8.48	2.35731	2.16899	2.34851	2.20232	2.06526	2.1729	2.29592	2.3254	2.17006
1.35109	0.0753055	1.05358	O14618	FALSE	Copper chaperone for superoxide dismutase OS=Homo sapiens OX=9606	CCS	-0.0535841	N/D	N/D	N/D	19	5	100	5	274	29	5.58	-0.921989	-0.936922	-0.886806	-0.893903	-0.753894	-0.844465	-0.86803	-0.919674	-0.902935
0.612767	0.0897778	1.06421	O14639	FALSE	Actin-binding LIM protein 1 OS=Homo sapiens OX=9606	ABLIM1	-0.0642063	N/D	N/D	N/D	9	5	47	5	778	87.6	8.59	-1.59691	-1.85379	-1.78873	-1.63559	-1.6687	-1.62361	-1.58995	-1.84186	-1.72323
2.01999	-0.187687	0.878012	O14641	TRUE	Segment polarity protein dishevelled homolog DVL-2 OS=Homo sapiens OX=9606	DVL2	0.121988	4.14282	131.388	N/D	23	12	119	10	736	78.9	6.02	-0.607981	-0.587719	-0.551201	-0.724011	-0.724397	-0.856173	-0.511514	-0.513735	-0.71089
0.116115	-0.0305543	0.979044	O14646	TRUE	Chromodomain-helicase-DNA-binding protein 1 OS=Homo sapiens OX=9606	CHD1	0.0209559	3.3305	N/D	N/D	22	32	516	27	1710	196.6	7.14	1.06673	1.28547	1.38496	1.37038	1.00225	1.13965	1.19034	1.1353	1.14509
3.71745	0.452635	1.36854	O14647	TRUE	Chromodomain-helicase-DNA-binding protein 2 OS=Homo sapiens OX=9606	CHD2	-0.368538	N/D	N/D	N/D	5	10	90	5	1828	211.2	8.1	-0.241768	-0.224541	-0.288057	0.308639	0.265931	0.287416	-0.144053	-0.0840893	-0.00933075
0.255579	0.0790133	1.0563	O14653	FALSE	Golgi SNAP receptor complex member 2 OS=Homo sapiens OX=9606	GOSR2	-0.0562954	N/D	N/D	N/D	17	4	32	4	212	24.8	8.06	-0.812628	-1.39098	-0.898773	-0.907081	-0.894073	-0.859215	-0.926169	-0.918499	-0.847771
0.338902	0.0478708	1.03374	O14656	FALSE	Torsin-1A OS=Homo sapiens OX=9606	TOR1A	-0.0337382	N/D	N/D	N/D	18	5	106	5	332	37.8	6.99	-0.611712	-0.720955	-0.558249	-0.534802	-0.62099	-0.573502	-0.554486	-0.769094	-0.531317
0.309552	0.168907	1.12421	O14657	FALSE	Torsin-1B OS=Homo sapiens OX=9606	TOR1B	-0.124206	N/D	N/D	N/D	12	4	102	4	336	38	8.54	-2.54253	-1.58646	-1.56025	-1.50819	-1.64192	-1.61967	-1.58833	-1.60796	-1.66745
0.472622	0.424068	1.34171	O14662	FALSE	Syntaxin-16 OS=Homo sapiens OX=9606	STX16	-0.341706	N/D	N/D	N/D	15	3	34	3	325	37	6.11	-4.07951	-4.28454	-2.83059	-3.18718	-2.72887	-2.78358	-2.97741	-2.85546	-2.91617
1.23746	-0.0705508	0.952274	O14672	TRUE	Disintegrin and metalloproteinase domain-containing protein 10 OS=Homo sapiens OX=9606	ADAM10	0.0477256	3.69999	N/D	N/D	58	33	1027	33	748	84.1	7.77	2.34708	2.36542	2.33983	2.27146	2.32635	2.19413	2.36156	2.29927	2.29401
0.236498	0.0270012	1.01889	O14681	FALSE	Etoposide-induced protein 2.4 homolog OS=Homo sapiens OX=9606	EI24	-0.0188921	N/D	N/D	N/D	11	4	77	4	340	38.9	9.72	-1.30554	-1.19913	-1.21197	-1.21764	-1.13181	-1.23702	-1.30141	-1.19074	-1.12615
0.69715	0.38298	1.30403	O14683	FALSE	Tumor protein p53-inducible protein 11 OS=Homo sapiens OX=9606	TP53I11	-0.304033	N/D	N/D	N/D	19	4	106	4	189	21	9.55	-1.74086	-1.75113	-1.85509	-0.955041	-0.95851	-1.05459	-0.977538	-0.896933	-1.0126
3.80321	0.758398	1.69161	O14686	TRUE	Histone-lysine N-methyltransferase 2D OS=Homo sapiens OX=9606	KMT2D	-0.691611	N/D	N/D	N/D	2	9	75	9	5537	593	5.58	1.39528	1.32321	1.35082	2.26058	2.28301	2.25675	1.62238	1.62571	1.73289
0.565437	-0.136432	0.909766	O14727	FALSE	Apoptotic protease-activating factor 1 OS=Homo sapiens OX=9606	APAF1	0.0902337	3.99644	N/D	N/D	6	6	40	6	1248	141.7	6.4	-1.94551	-2.08862	-1.70541	-1.95167	-2.02102	-1.9145	-1.69714	-1.59486	-1.92423
0.077167	-0.0176101	0.987868	O14730	TRUE	Serine/threonine-protein kinase RIO3 OS=Homo sapiens OX=9606	RIOK3	0.0121322	3.08924	N/D	N/D	6	3	42	3	519	59.1	5.76	-2.8786	-2.66573	-2.99719	-2.87701	-2.74499	-2.86654	-2.66914	-2.87213	-2.78863
2.89191	-1.38707	0.38234	O14733	TRUE	Dual specificity mitogen-activated protein kinase kinase 7 OS=Homo sapiens OX=9606	MAP2K7	0.61766	5.2083	2.12845	5.2083	22	8	121	8	419	47.5	9.16	-1.19489	-0.912985	-1.06554	-2.09552	-2.02435	-3.24549	-1.015	-1.20557	-1.01431
0.590754	0.205894	1.1534	O14734	FALSE	Acyl-coenzyme A thioesterase 8 OS=Homo sapiens OX=9606	ACOT8	-0.153401	N/D	N/D	N/D	20	4	66	4	319	35.9	7.56	-1.3681	-1.43849	-1.45485	-0.767142	-1.21885	-1.00952	-1.01165	-1.00463	-0.948669
4.19278	-0.480514	0.716722	O14735	FALSE	CDP-diacylglycerol--inositol 3-phosphatidyltransferase OS=Homo sapiens OX=9606	CDIPT	0.283278	4.59686	4.62763	N/D	10	2	66	2	213	23.5	8.03	1.54377	1.53242	1.49877	0.945622	0.999316	0.973959	1.40626	1.29511	1.44456
1.37139	0.121542	1.0879	O14737	FALSE	Programmed cell death protein 5 OS=Homo sapiens OX=9606	PDCD5	-0.0878966	N/D	N/D	N/D	61	8	222	8	125	14.3	6.04	1.42195	1.5501	1.60543	1.57366	1.73147	1.61897	1.48979	1.55552	1.49616
1.0563	0.0507719	1.03582	O14744	FALSE	Protein arginine N-methyltransferase 5 OS=Homo sapiens OX=9606	PRMT5	-0.035819	N/D	N/D	N/D	44	27	1329	27	637	72.6	6.29	4.24807	4.1985	4.22362	4.32886	4.26945	4.23564	4.25533	4.18334	4.25441
0.585631	0.0367392	1.02579	O14745	FALSE	Na(+)/H(+) exchange regulatory cofactor NHE-RF1 OS=Homo sapiens OX=9606	SLC9A3R1	-0.0257927	N/D	N/D	N/D	70	22	1303	22	358	38.8	5.77	4.43465	4.38933	4.37696	4.50635	4.45773	4.44343	4.47507	4.42624	4.49234
0.0923604	-0.026629	0.981712	O14757	FALSE	Serine/threonine-protein kinase Chk1 OS=Homo sapiens OX=9606	CHEK1	0.0182885	3.27019	N/D	N/D	33	17	503	17	476	54.4	8.25	1.55921	1.51156	1.49614	1.43445	1.37125	1.45041	1.09197	1.48703	1.52608
0.467724	0.22129	1.16578	O14772	FALSE	Fucose-1-phosphate guanylyltransferase OS=Homo sapiens OX=9606	FPGT	-0.165775	N/D	N/D	N/D	2	1	8	1	607	68	6.87	-5.03839	-4.20472	-4.37244	-4.33312	-4.17835	-4.00795	-4.10632	-4.49326	-4.15146
0.15387	0.0162749	1.01134	O14773	FALSE	Tripeptidyl-peptidase 1 OS=Homo sapiens OX=9606	TPP1	-0.0113448	N/D	N/D	N/D	9	3	132	3	563	61.2	6.48	-0.815828	-0.744888	-0.79583	-0.68294	-0.746572	-0.74951	-0.632792	-0.731323	-0.735031
0.691585	0.0311313	1.02181	O14776	TRUE	Transcription elongation regulator 1 OS=Homo sapiens OX=9606	TCERG1	-0.0218131	N/D	N/D	N/D	29	40	1273	40	1098	123.8	8.65	4.14883	4.186	4.16879	4.16175	4.19948	4.15305	4.10713	4.12918	4.10184
0.529822	0.0505598	1.03567	O14777	FALSE	Kinetochore protein NDC80 homolog OS=Homo sapiens OX=9606	NDC80	-0.0356667	N/D	N/D	N/D	38	24	434	24	642	73.9	5.6	2.15187	2.07952	2.17903	2.23611	2.12101	2.15636	2.0402	2.07337	2.19961
0.58669	0.291111	1.22358	O14782	FALSE	Kinesin-like protein KIF3C OS=Homo sapiens OX=9606	KIF3C	-0.223582	N/D	N/D	N/D	4	3	11	1	793	89.4	8.37	-3.23231	-3.27104	-3.0496	-3.02422	-3.17494	-3.46914	-3.79023	-3.86858	-3.87153
1.53588	0.111375	1.08026	O14787	FALSE	Transportin-2 OS=Homo sapiens OX=9606	TNPO2	-0.0802571	N/D	N/D	N/D	20	13	206	11	897	101.3	5.01	0.539333	0.632362	0.646225	0.711841	0.635541	0.737225	0.545485	0.507713	0.629845
2.41195	0.0953482	1.06832	O14802	TRUE	DNA-directed RNA polymerase III subunit RPC1 OS=Homo sapiens OX=9606	POLR3A	-0.0683232	N/D	N/D	N/D	19	23	338	22	1390	155.5	8.48	0.495079	0.483246	0.474419	0.541881	0.554959	0.574234	0.48594	0.413343	0.418032
1.25423	0.0740886	1.0527	O14818	FALSE	Proteasome subunit alpha type-7 OS=Homo sapiens OX=9606	PSMA7	-0.0526958	N/D	N/D	N/D	58	12	1144	7	248	27.9	8.46	3.98524	4.00279	3.94422	4.02477	4.01295	3.99211	3.87862	3.92995	3.87431
0.269461	-0.0426396	0.970877	O14828	TRUE	Secretory carrier-associated membrane protein 3 OS=Homo sapiens OX=9606	SCAMP3	0.029123	3.47707	N/D	N/D	37	9	312	9	347	38.3	7.64	0.936771	1.22952	1.14368	1.08777	1.05719	1.10546	1.1588	1.21772	1.07018
0.538455	0.654586	1.57416	O14874	FALSE	[3-methyl-2-oxobutanoate dehydrogenase [lipoamide]] kinase, mitochondrial OS=Homo sapiens OX=9606	BCKDK	-0.574164	N/D	N/D	N/D	11	3	12	3	412	46.3	8.82	-6.66893	-4.7569	-4.2748	-4.0732	-4.23534	-4.11031	-4.44673	-4.6049	-4.01295
1.60608	0.322323	1.25034	O14880	FALSE	Microsomal glutathione S-transferase 3 OS=Homo sapiens OX=9606	MGST3	-0.250342	N/D	N/D	N/D	26	4	81	4	152	16.5	9.38	-1.39999	-1.51531	-1.45547	-1.32756	-1.10681	-1.16149	-1.66349	-1.7828	-1.3086
0.00372518	0.00054884	1.00038	O14893	TRUE	Gem-associated protein 2 OS=Homo sapiens OX=9606	GEMIN2	-0.000380499	N/D	N/D	N/D	14	3	39	3	280	31.6	5.58	-1.54381	-1.60653	-1.46465	-1.4761	-1.50736	-1.58078	-1.5328	-1.40347	-1.58051
0.349478	0.07445	1.05296	O14907	FALSE	Tax1-binding protein 3 OS=Homo sapiens OX=9606	TAX1BP3	-0.0529596	N/D	N/D	N/D	27	2	24	2	124	13.7	8.48	-2.12682	-1.83363	-2.12675	-2.05562	-2.04702	-2.03719	-2.22281	-2.13293	-2.28342
0.0533882	0.00991646	1.0069	O14908	FALSE	PDZ domain-containing protein GIPC1 OS=Homo sapiens OX=9606	GIPC1	-0.00689725	N/D	N/D	N/D	30	9	183	9	333	36	6.28	-0.0971584	-0.195997	-0.282906	-0.218106	-0.0473127	-0.161688	-0.00542927	-0.192268	-0.139954
0.366516	0.0994077	1.07133	O14910	FALSE	Protein lin-7 homolog A OS=Homo sapiens OX=9606	LIN7A	-0.0713335	N/D	N/D	N/D	27	5	141	1	233	26	8.72	-2.78566	-3.08627	-3.21741	-2.78182	-2.80767	-2.84914	-2.78251	-2.88436	-2.71749
0.221877	0.0349526	1.02452	O14920	FALSE	Inhibitor of nuclear factor kappa-B kinase subunit beta OS=Homo sapiens OX=9606	IKBKB	-0.0245232	N/D	N/D	N/D	22	14	218	13	756	86.5	5.78	-0.301367	-0.392338	-0.590843	-0.416121	-0.434928	-0.315681	-0.365033	-0.439838	-0.453758
0.223984	0.0390115	1.02741	O14925	FALSE	Mitochondrial import inner membrane translocase subunit Tim23 OS=Homo sapiens OX=9606	TIMM23	-0.0274096	N/D	N/D	N/D	24	4	35	4	209	21.9	8.6	-0.780907	-0.791559	-0.637749	-0.817008	-0.776538	-0.66991	-0.921014	-0.724409	-0.905344
0.773729	0.0725932	1.05161	O14929	FALSE	Histone acetyltransferase type B catalytic subunit OS=Homo sapiens OX=9606	HAT1	-0.0516052	N/D	N/D	N/D	43	13	651	13	419	49.5	5.69	3.14868	3.17669	3.22221	3.10965	3.26042	3.32279	3.10855	3.14804	3.146
3.24322	0.454526	1.37033	O14933	FALSE	Ubiquitin/ISG15-conjugating enzyme E2 L6 OS=Homo sapiens OX=9606	UBE2L6	-0.370333	N/D	N/D	N/D	14	3	85	3	153	17.8	7.88	-1.13081	-1.21459	-1.21002	-0.610139	-0.665164	-0.704782	-0.961177	-0.957655	-1.21307
1.18805	-0.149868	0.901333	O14949	FALSE	Cytochrome b-c1 complex subunit 8 OS=Homo sapiens OX=9606	UQCRQ	0.098667	4.03929	N/D	N/D	48	4	116	4	82	9.9	10.08	-0.0500717	0.0436459	-0.166168	-0.298936	-0.299222	-0.263069	-0.177726	-0.270555	-0.202372
1.07772	0.0704344	1.05003	O14964	FALSE	Hepatocyte growth factor-regulated tyrosine kinase substrate OS=Homo sapiens OX=9606	HGS	-0.0500328	N/D	N/D	N/D	19	17	536	17	777	86.1	6.16	1.71374	1.63723	1.64097	1.77211	1.75558	1.80029	1.7344	1.7241	1.78291
1.29125	-0.609496	0.655426	O14965	FALSE	Aurora kinase A OS=Homo sapiens OX=9606	AURKA	0.344574	4.72076	3.62831	N/D	20	6	62	5	403	45.8	9.39	-2.17956	-2.03739	-2.47263	-2.10456	-2.74859	-2.8897	-1.83336	-1.46441	-1.84138
0.69042	0.0952083	1.06822	O14966	FALSE	Ras-related protein Rab-7L1 OS=Homo sapiens OX=9606	RAB29	-0.0682196	N/D	N/D	N/D	14	3	98	3	203	23.1	7.18	-2.11665	-2.22065	-2.26688	-2.13413	-2.12594	-2.27736	-2.31879	-2.31077	-2.41236
2.94944	0.0981943	1.07043	O14967	TRUE	Calmegin OS=Homo sapiens OX=9606	CLGN	-0.0704328	N/D	N/D	N/D	9	6	113	6	610	70	4.69	0.563234	0.533709	0.553995	0.633258	0.657956	0.676987	0.572417	0.523392	0.600489
0.473718	0.0762776	1.05429	O14972	FALSE	Vacuolar protein sorting-associated protein 26C OS=Homo sapiens OX=9606	VPS26C	-0.0542942	N/D	N/D	N/D	7	2	56	2	297	33	7.68	-3.28046	-3.34359	-3.32397	-3.25631	-3.39299	-3.34385	-3.40061	-3.55779	-3.53753
6.18967	-0.556062	0.680156	O14974	TRUE	Protein phosphatase 1 regulatory subunit 12A OS=Homo sapiens OX=9606	PPP1R12A	0.319844	4.67233	3.95914	4.67233	35	33	721	33	1030	115.2	5.4	2.3353	2.21948	2.2257	1.7443	1.70969	1.6904	2.256	2.25142	2.33722
0.0822745	-0.00985161	0.993195	O14976	TRUE	Cyclin-G-associated kinase OS=Homo sapiens OX=9606	GAK	0.00680536	2.83582	N/D	N/D	25	29	628	29	1311	143.1	5.73	2.25455	2.35437	2.22005	2.26867	2.22062	2.19792	2.26312	2.1637	2.17773
2.34491	0.149471	1.10916	O14979	FALSE	Heterogeneous nuclear ribonucleoprotein D-like OS=Homo sapiens OX=9606	HNRNPDL	-0.109163	N/D	N/D	N/D	34	15	1308	13	420	46.4	9.57	4.47475	4.51296	4.44324	4.66386	4.55968	4.64457	4.46201	4.40331	4.54312
2.04743	0.142724	1.10399	O14980	FALSE	Exportin-1 OS=Homo sapiens OX=9606	XPO1	-0.103988	N/D	N/D	N/D	41	37	1268	37	1071	123.3	6.06	4.1451	4.16401	4.08271	4.25632	4.24786	4.18341	4.01534	4.01937	4.09231
2.91289	0.177317	1.13078	O14981	FALSE	TATA-binding protein-associated factor 172 OS=Homo sapiens OX=9606	BTAF1	-0.130779	N/D	N/D	N/D	17	26	413	26	1849	206.8	6.52	1.91408	1.9118	1.92111	2.14474	2.16494	2.08921	1.95028	2.03132	2.00529
0.792653	-0.669781	0.628602	O14983	FALSE	Sarcoplasmic/endoplasmic reticulum calcium ATPase 1 OS=Homo sapiens OX=9606	ATP2A1	0.371398	4.77146	3.34173	N/D	15	14	744	1	1001	110.2	5.16	-2.13041	-2.08658	-2.57922	-3.60607	-3.70676	-3.35073	-3.33891	-3.60467	-3.56864
0.57651	0.0564818	1.03993	O15014	TRUE	Zinc finger protein 609 OS=Homo sapiens OX=9606	ZNF609	-0.0399267	N/D	N/D	N/D	5	4	40	4	1411	151.1	8.03	-0.92948	-1.08219	-0.881401	-0.92475	-0.921153	-0.909899	-1.05243	-0.974867	-0.930136
0.273103	0.259704	1.19723	O15020	TRUE	Spectrin beta chain, non-erythrocytic 2 OS=Homo sapiens OX=9606	SPTBN2	-0.197233	N/D	N/D	N/D	6	12	256	6	2390	271.2	6.11	-3.49559	-2.05252	-2.14873	-1.8409	-2.92517	-1.99289	-2.1555	-2.45065	-2.77315
0.756345	-0.0316844	0.978277	O15027	TRUE	Protein transport protein Sec16A OS=Homo sapiens OX=9606	SEC16A	0.0217225	3.34645	N/D	N/D	30	49	1174	49	2357	251.7	5.8	2.39291	2.34824	2.41604	2.3847	2.31444	2.33172	2.34794	2.36889	2.3778
0.109933	-0.146325	0.903549	O15040	FALSE	Tectonin beta-propeller repeat-containing protein 2 OS=Homo sapiens OX=9606	TECPR2	0.096451	4.02835	N/D	N/D	1	1	1	1	1411	153.8	5.55	-5.65436	-5.82562	-5.6893	-4.47515	-6.31539	-6.51618	-5.83214	-4.78114	-5.95293
0.538278	-0.0271691	0.981344	O15042	TRUE	U2 snRNP-associated SURP motif-containing protein OS=Homo sapiens OX=9606	U2SURP	0.0186559	3.279	N/D	N/D	29	29	821	29	1029	118.2	8.47	3.61107	3.61419	3.53522	3.53242	3.53837	3.53241	3.53802	3.5384	3.53252
0.284461	-0.0420636	0.971265	O15047	TRUE	Histone-lysine N-methyltransferase SETD1A OS=Homo sapiens OX=9606	SETD1A	0.0287353	3.47108	N/D	N/D	13	17	166	16	1707	185.9	5.14	0.76763	0.589054	0.742002	0.733476	0.550858	0.562616	0.565522	0.643311	0.638763
3.55758	-2.11363	0.231065	O15056	TRUE	Synaptojanin-2 OS=Homo sapiens OX=9606	SYNJ2	0.768935	5.52216	1.81716	5.52216	6	6	17	6	1496	165.4	7.34	-2.67264	-2.67106	-2.6139	-4.09873	-5.71021	-4.56349	-2.64946	-2.67077	-2.78523
1.86839	0.266749	1.20309	O15066	FALSE	Kinesin-like protein KIF3B OS=Homo sapiens OX=9606	KIF3B	-0.203094	N/D	N/D	N/D	8	5	39	2	747	85.1	7.69	-3.92203	-3.64689	-3.59344	-3.46817	-3.51186	-3.53651	-3.76062	-3.79915	-3.91146
0.0163643	-0.00556389	0.996151	O15067	TRUE	Phosphoribosylformylglycinamidine synthase OS=Homo sapiens OX=9606	PFAS	0.00384917	2.58704	N/D	N/D	42	43	1782	43	1338	144.6	5.76	4.56879	4.8966	4.90339	4.5428	4.97234	4.76275	4.7061	4.84906	4.6652
0.135899	0.019005	1.01326	O15069	TRUE	NAC-alpha domain-containing protein 1 OS=Homo sapiens OX=9606	NACAD	-0.0132604	N/D	N/D	N/D	1	1	4	1	1562	161	4.23	1.85888	2.05704	2.0535	1.97027	1.97044	2.04839	2.04119	1.91817	1.9354
0.186464	0.0440777	1.03102	O15078	FALSE	Centrosomal protein of 290 kDa OS=Homo sapiens OX=9606	CEP290	-0.0310239	N/D	N/D	N/D	1	4	31	3	2479	290.2	5.95	0.384878	0.265526	0.143038	0.398973	0.152524	0.188395	0.278905	0.0193844	0.123585
1.69404	-0.164574	0.892192	O15083	FALSE	ERC protein 2 OS=Homo sapiens OX=9606	ERC2	0.107808	4.08219	N/D	N/D	5	5	16	1	957	110.5	6.99	1.02281	0.9436	1.03691	0.8143	0.780831	0.817478	0.885287	0.847279	1.07678
0.857619	0.206094	1.15356	O15084	FALSE	Serine/threonine-protein phosphatase 6 regulatory ankyrin repeat subunit A OS=Homo sapiens OX=9606	ANKRD28	-0.15356	N/D	N/D	N/D	26	18	292	15	1053	112.9	6.25	0.327227	0.25495	0.278551	0.733201	0.278886	0.208147	0.120032	0.0704308	0.152716
0.209911	-0.0491614	0.966498	O15091	FALSE	Mitochondrial ribonuclease P catalytic subunit OS=Homo sapiens OX=9606	PRORP	0.0335021	3.53987	N/D	N/D	11	7	87	7	583	67.3	8.78	-1.45016	-1.3566	-1.2561	-1.43832	-1.47879	-1.57797	-1.40429	-1.54029	-1.68777
0.170174	-0.00863377	0.994033	O15111	FALSE	Inhibitor of nuclear factor kappa-B kinase subunit alpha OS=Homo sapiens OX=9606	CHUK	0.0059666	2.77833	N/D	N/D	30	20	364	19	745	84.6	6.73	2.46197	2.51006	2.47347	2.44635	2.46586	2.49518	2.47157	2.43662	2.51289
1.52901	0.246007	1.18592	O15116	FALSE	U6 snRNA-associated Sm-like protein LSm1 OS=Homo sapiens OX=9606	LSM1	-0.185921	N/D	N/D	N/D	17	2	42	2	133	15.2	5.22	-0.188578	-0.202291	-0.567291	-0.0386438	-0.0181551	-0.144787	-0.233155	-0.389904	-0.297997
0.946116	-0.0541692	0.963149	O15117	TRUE	FYN-binding protein 1 OS=Homo sapiens OX=9606	FYB1	0.0368511	3.58276	N/D	N/D	49	24	884	24	783	85.3	6.48	3.20436	3.23844	3.27994	3.20701	3.2554	3.20749	3.32182	3.30711	3.31315
0.0575186	-0.00943454	0.993482	O15118	FALSE	NPC intracellular cholesterol transporter 1 OS=Homo sapiens OX=9606	NPC1	0.00651819	2.81697	N/D	N/D	2	2	46	2	1278	142.1	5.36	-2.27198	-2.29649	-2.24218	-2.14994	-2.42745	-2.23024	-2.26136	-2.19639	-2.29024
0.0240315	-0.0167247	0.988474	O15121	FALSE	Sphingolipid delta(4)-desaturase DES1 OS=Homo sapiens OX=9606	DEGS1	0.0115258	3.0667	N/D	N/D	11	3	52	3	323	37.8	7.46	-2.11362	-1.68666	-2.32614	-1.78171	-2.28012	-2.2226	-2.19968	-2.52951	-1.61287
0.0633059	0.00968122	1.00673	O15126	FALSE	Secretory carrier-associated membrane protein 1 OS=Homo sapiens OX=9606	SCAMP1	-0.00673308	N/D	N/D	N/D	27	6	168	6	338	37.9	7.42	0.686932	0.843914	0.861656	0.800454	0.853734	0.677391	0.717862	0.769157	0.72555
0.702305	0.0812027	1.0579	O15127	FALSE	Secretory carrier-associated membrane protein 2 OS=Homo sapiens OX=9606	SCAMP2	-0.0578996	N/D	N/D	N/D	15	4	98	4	329	36.6	6.1	-0.403711	-0.437614	-0.639435	-0.483272	-0.33196	-0.425383	-0.511483	-0.513046	-0.463154
0.0120699	0.000575542	1.0004	O15143	FALSE	Actin-related protein 2/3 complex subunit 1B OS=Homo sapiens OX=9606	ARPC1B	-0.000399015	N/D	N/D	N/D	53	17	647	16	372	40.9	8.35	3.40655	3.40831	3.46405	3.43974	3.43646	3.41341	3.44621	3.40579	3.44487
1.97859	0.100067	1.07182	O15144	FALSE	Actin-related protein 2/3 complex subunit 2 OS=Homo sapiens OX=9606	ARPC2	-0.0718235	N/D	N/D	N/D	65	20	1101	20	300	34.3	7.36	4.05926	4.037	4.07527	4.11918	4.11594	4.10884	3.97462	3.97117	3.97018
1.84649	0.117024	1.0845	O15145	FALSE	Actin-related protein 2/3 complex subunit 3 OS=Homo sapiens OX=9606	ARPC3	-0.0844956	N/D	N/D	N/D	32	6	398	6	178	20.5	8.59	2.65769	2.53926	2.58259	2.77223	2.6862	2.7632	2.68062	2.64255	2.63841
3.27362	-1.11351	0.462168	O15151	FALSE	Protein Mdm4 OS=Homo sapiens OX=9606	MDM4	0.537832	5.06585	2.37123	5.06585	3	1	20	1	490	54.8	5	0.916452	1.00465	0.951784	-0.394641	-0.449243	-0.440201	0.468349	0.274673	0.496981
0.822754	0.161709	1.11861	O15155	FALSE	BET1 homolog OS=Homo sapiens OX=9606	BET1	-0.118611	N/D	N/D	N/D	9	1	45	1	118	13.3	9.06	-2.33623	-2.32902	-2.62991	-2.35372	-2.33723	-2.40337	-2.69421	-2.67757	-2.49195
0.733607	0.055011	1.03887	O15160	FALSE	DNA-directed RNA polymerases I and III subunit RPAC1 OS=Homo sapiens OX=9606	POLR1C	-0.038867	N/D	N/D	N/D	37	9	274	9	346	39.2	5.5	1.28146	1.26035	1.27908	1.26767	1.2844	1.41306	1.2853	1.19514	1.29887
0.463426	0.0498675	1.03517	O15162	FALSE	Phospholipid scramblase 1 OS=Homo sapiens OX=9606	PLSCR1	-0.0351698	N/D	N/D	N/D	5	2	18	2	318	35	4.94	-2.78797	-2.73342	-2.72324	-2.7654	-2.69803	-2.7561	-2.92168	-2.84125	-2.7307
0.120087	0.0559634	1.03955	O15164	FALSE	Transcription intermediary factor 1-alpha OS=Homo sapiens OX=9606	TRIM24	-0.039553	N/D	N/D	N/D	13	11	157	9	1050	116.8	7.11	-0.918705	-0.984217	-1.33701	-0.737281	-0.829944	-0.995165	-0.979108	-0.48946	-0.75206
0.616862	-0.165408	0.891676	O15165	TRUE	Low-density lipoprotein receptor class A domain-containing protein 4 OS=Homo sapiens OX=9606	LDLRAD4	0.108324	4.08452	N/D	N/D	7	2	8	2	306	33.9	6.28	-4.34802	-4.42698	-4.32565	-4.50875	-4.55331	-4.80015	-4.50914	-4.30572	-4.81647
0.0564145	-0.0300062	0.979416	O15173	FALSE	Membrane-associated progesterone receptor component 2 OS=Homo sapiens OX=9606	PGRMC2	0.0205839	3.32256	N/D	N/D	34	8	302	7	223	23.8	4.88	0.926958	0.259911	0.692913	0.32129	0.654294	0.314573	0.220881	0.229919	0.42977
1.53811	0.0839117	1.05989	O15182	FALSE	Centrin-3 OS=Homo sapiens OX=9606	CETN3	-0.0598879	N/D	N/D	N/D	22	4	141	4	167	19.5	4.74	-0.66338	-0.727741	-0.693027	-0.599612	-0.651702	-0.676451	-0.735845	-0.793716	-0.745291
0.0575959	0.00438325	1.00304	O15212	FALSE	Prefoldin subunit 6 OS=Homo sapiens OX=9606	PFDN6	-0.00304285	N/D	N/D	N/D	57	8	365	8	129	14.6	8.88	3.04692	3.10111	3.13866	3.14438	3.1043	3.11592	3.17651	3.10999	3.12974
0.765653	0.0450765	1.03174	O15213	TRUE	WD repeat-containing protein 46 OS=Homo sapiens OX=9606	WDR46	-0.0317379	N/D	N/D	N/D	20	11	102	11	610	68	9.67	2.11404	2.01209	2.06963	2.11966	2.04729	2.09466	2.00922	2.04604	2.00174
0.362491	-0.197673	0.871956	O15226	TRUE	NF-kappa-B-repressing factor OS=Homo sapiens OX=9606	NKRF	0.128044	4.16686	57.8845	N/D	34	26	501	26	690	77.6	8.79	1.83402	2.31418	2.77342	1.88331	2.16489	1.772	1.85585	2.22425	1.82473
0.204286	-0.0318586	0.978159	O15228	FALSE	Dihydroxyacetone phosphate acyltransferase OS=Homo sapiens OX=9606	GNPAT	0.0218407	3.34886	N/D	N/D	24	16	370	16	680	77.1	6.57	1.03801	1.02245	0.987236	0.953366	1.14273	1.00127	1.01633	1.10814	1.21372
3.44964	-0.26323	0.83322	O15234	TRUE	Protein CASC3 OS=Homo sapiens OX=9606	CASC3	0.16678	4.30138	13.3149	N/D	23	13	174	13	703	76.2	6.48	0.423815	0.381214	0.418343	0.164479	0.248851	0.18609	0.512311	0.529638	0.512901
6.12242	-1.81891	0.283435	O15235	TRUE	28S ribosomal protein S12, mitochondrial OS=Homo sapiens OX=9606	MRPS12	0.716565	5.4028	1.91016	5.4028	33	4	120	4	138	15.2	10.29	-0.0454922	-0.323101	-0.181084	-1.91296	-1.80368	-2.26854	-0.215869	-0.070549	-0.220783
0.0986697	0.0454857	1.03203	O15239	FALSE	NADH dehydrogenase [ubiquinone] 1 alpha subcomplex subunit 1 OS=Homo sapiens OX=9606	NDUFA1	-0.0320305	N/D	N/D	N/D	19	1	36	1	70	8.1	8.84	-1.90556	-1.71679	-1.56495	-1.97581	-1.79415	-1.96915	-2.16819	-2.26422	-2.13143
0.884349	0.132277	1.09602	O15254	FALSE	Peroxisomal acyl-coenzyme A oxidase 3 OS=Homo sapiens OX=9606	ACOX3	-0.0960224	N/D	N/D	N/D	5	3	20	3	700	77.6	7.25	-2.32374	-2.65756	-2.41971	-2.39137	-2.2964	-2.33804	-2.53174	-2.54516	-2.36738
0.747053	0.126568	1.09169	O15258	TRUE	Protein RER1 OS=Homo sapiens OX=9606	RER1	-0.0916938	N/D	N/D	N/D	25	4	206	4	196	22.9	9.54	0.703831	0.746532	0.792891	0.807965	1.02235	0.83466	0.669103	0.66927	0.988913
1.86659	0.206668	1.15402	O15260	FALSE	Surfeit locus protein 4 OS=Homo sapiens OX=9606	SURF4	-0.15402	N/D	N/D	N/D	10	3	185	3	269	30.4	7.78	0.169983	0.361433	0.119728	0.375869	0.485782	0.319841	0.119067	0.20326	0.149502
0.075445	-0.00486167	0.996636	O15269	FALSE	Serine palmitoyltransferase 1 OS=Homo sapiens OX=9606	SPTLC1	0.00336418	2.52834	N/D	N/D	23	9	269	9	473	52.7	6.01	0.662207	0.657476	0.615803	0.618541	0.604129	0.660501	0.589208	0.602268	0.66855
0.743373	-0.11862	0.921068	O15270	FALSE	Serine palmitoyltransferase 2 OS=Homo sapiens OX=9606	SPTLC2	0.078932	3.93296	N/D	N/D	28	13	191	13	562	62.9	7.78	-0.309841	-0.567646	-0.447054	-0.507075	-0.701022	-0.628256	-0.652787	-0.531233	-0.452423
0.368495	0.0254483	1.0178	O15287	FALSE	Fanconi anemia group G protein OS=Homo sapiens OX=9606	FANCG	-0.0177959	N/D	N/D	N/D	5	3	7	3	622	68.5	5.47	1.5496	1.49582	1.53272	1.56994	1.59924	1.6029	1.63263	1.60128	1.57941
0.163469	-0.0140386	0.990316	O15294	FALSE	UDP-N-acetylglucosamine--peptide N-acetylglucosaminyltransferase 110 kDa subunit OS=Homo sapiens OX=9606	OGT	0.0096836	2.99026	N/D	N/D	23	24	443	24	1046	116.9	6.7	1.31141	1.37445	1.33786	1.3142	1.30059	1.32749	1.403	1.25439	1.28766
0.900271	0.498055	1.41231	O15304	FALSE	Apoptosis regulatory protein Siva OS=Homo sapiens OX=9606	SIVA1	-0.412308	N/D	N/D	N/D	36	5	70	5	175	18.7	7.61	-2.63281	-2.16133	-2.47211	-1.38201	-1.97159	-1.52379	-1.39761	-2.17603	-1.9032
1.10276	0.114606	1.08268	O15305	FALSE	Phosphomannomutase 2 OS=Homo sapiens OX=9606	PMM2	-0.0826796	N/D	N/D	N/D	28	10	382	10	246	28.1	6.77	0.878975	0.877234	0.911392	1.01382	1.10111	0.829538	0.874728	0.828871	0.830112
0.376128	-0.0734251	0.950379	O15315	FALSE	DNA repair protein RAD51 homolog 2 OS=Homo sapiens OX=9606	RAD51B	0.049621	3.71777	N/D	N/D	5	2	14	2	384	42.2	5.69	-3.48163	-3.5206	-3.68531	-3.68287	-3.73767	-3.74542	-3.6473	-3.88212	-3.6744
2.163	0.226393	1.16991	O15318	TRUE	DNA-directed RNA polymerase III subunit RPC7 OS=Homo sapiens OX=9606	POLR3G	-0.169906	N/D	N/D	N/D	21	4	30	4	223	25.9	4.63	-2.47875	-2.43317	-2.42248	-2.05843	-2.17388	-2.34317	-2.39725	-2.42796	-2.34972
1.23454	0.131056	1.09509	O15321	FALSE	Transmembrane 9 superfamily member 1 OS=Homo sapiens OX=9606	TM9SF1	-0.0950947	N/D	N/D	N/D	4	2	28	2	606	68.8	7.17	-0.84721	-0.859724	-0.905045	-0.773086	-0.713593	-0.736786	-0.704671	-0.974081	-0.942533
0.492672	-0.0417533	0.971474	O15344	FALSE	E3 ubiquitin-protein ligase Midline-1 OS=Homo sapiens OX=9606	MID1	0.0285264	3.46782	N/D	N/D	3	2	3	2	667	75.2	6.8	-2.67477	-2.70559	-2.68544	-2.65399	-2.6863	-2.81363	-2.63034	-2.72596	-2.63519
4.42297	0.1255	1.09089	O15347	TRUE	High mobility group protein B3 OS=Homo sapiens OX=9606	HMGB3	-0.0908854	N/D	N/D	N/D	41	9	459	9	200	23	8.37	2.52103	2.5051	2.50569	2.63585	2.62315	2.63022	2.46584	2.53115	2.49665
1.42822	0.0406429	1.02857	O15355	FALSE	Protein phosphatase 1G OS=Homo sapiens OX=9606	PPM1G	-0.0285721	N/D	N/D	N/D	44	22	935	22	546	59.2	4.36	3.88004	3.81284	3.84699	3.88254	3.87896	3.87449	3.83272	3.80821	3.84734
0.325111	-0.213334	0.862542	O15360	FALSE	Fanconi anemia group A protein OS=Homo sapiens OX=9606	FANCA	0.137458	4.20239	31.2998	N/D	2	3	9	3	1455	162.7	6.6	-3.85959	-3.75212	-3.33691	-3.42282	-4.51957	-3.42848	-3.26492	-3.76605	-3.48215
0.084412	0.00423416	1.00294	O15371	TRUE	Eukaryotic translation initiation factor 3 subunit D OS=Homo sapiens OX=9606	EIF3D	-0.0029392	N/D	N/D	N/D	48	21	1281	21	548	63.9	6.05	4.44312	4.44883	4.43858	4.46321	4.40133	4.41821	4.40786	4.39372	4.40796
0.798113	-0.0382771	0.973817	O15372	TRUE	Eukaryotic translation initiation factor 3 subunit H OS=Homo sapiens OX=9606	EIF3H	0.0261828	3.42954	N/D	N/D	44	15	721	15	352	39.9	6.54	3.5034	3.40684	3.43418	3.36993	3.40403	3.39453	3.41864	3.39919	3.40441
1.28602	0.0487514	1.03437	O15379	FALSE	Histone deacetylase 3 OS=Homo sapiens OX=9606	HDAC3	-0.0343693	N/D	N/D	N/D	33	13	263	12	428	48.8	5.16	0.182301	0.244125	0.250086	0.291814	0.281203	0.261999	0.236985	0.195408	0.26862
0.305157	0.0388058	1.02726	O15381	TRUE	Nuclear valosin-containing protein-like OS=Homo sapiens OX=9606	NVL	-0.0272632	N/D	N/D	N/D	24	17	224	17	856	95	6.48	-0.369839	-0.316813	-0.399687	-0.270375	-0.210704	-0.405067	-0.214341	-0.347437	-0.357012
1.23501	0.0915618	1.06552	O15382	TRUE	Branched-chain-amino-acid aminotransferase, mitochondrial OS=Homo sapiens OX=9606	BCAT2	-0.065523	N/D	N/D	N/D	31	11	270	11	392	44.3	8.65	1.81499	1.82275	1.84204	2.01659	1.97027	1.89252	1.88468	1.88157	1.96337
0.0695632	-0.0199545	0.986264	O15392	FALSE	Baculoviral IAP repeat-containing protein 5 OS=Homo sapiens OX=9606	BIRC5	0.0137362	3.14387	N/D	N/D	30	3	18	3	142	16.4	5.9	-3.28033	-3.37178	-3.14846	-3.10252	-3.43251	-3.38761	-3.26877	-3.16296	-3.49326
0.158006	0.0139972	1.00975	O15397	FALSE	Importin-8 OS=Homo sapiens OX=9606	IPO8	-0.00974936	N/D	N/D	N/D	13	13	311	13	1037	119.9	5.16	1.13806	1.16889	1.14005	1.1125	1.20107	1.25456	1.18197	1.19202	1.2313
0.522601	0.0417714	1.02938	O15400	FALSE	Syntaxin-7 OS=Homo sapiens OX=9606	STX7	-0.029377	N/D	N/D	N/D	29	6	212	6	261	29.8	5.55	-0.0127163	-0.078907	-0.0453014	0.000763893	-0.0968485	-0.0329266	-0.146756	-0.147421	-0.077549
0.42019	0.113377	1.08176	O15431	FALSE	High affinity copper uptake protein 1 OS=Homo sapiens OX=9606	SLC31A1	-0.0817575	N/D	N/D	N/D	10	1	26	1	190	21.1	7.42	-3.13153	-3.10925	-3.18349	-3.21966	-3.03988	-3.25854	-3.61186	-3.33098	-3.3493
0.9845	0.178698	1.13186	O15439	FALSE	ATP-binding cassette sub-family C member 4 OS=Homo sapiens OX=9606	ABCC4	-0.131862	N/D	N/D	N/D	6	7	41	7	1325	149.4	8.19	-2.0053	-2.29924	-2.21869	-1.91823	-2.1426	-2.05396	-2.16105	-2.1848	-2.43268
4.93933	-0.567804	0.674643	O15446	TRUE	DNA-directed RNA polymerase I subunit RPA34 OS=Homo sapiens OX=9606	POLR1G	0.325357	4.68329	3.87862	4.68329	36	11	231	11	510	55	8.51	0.370064	0.315443	0.40509	-0.273009	-0.32647	-0.20997	0.249516	0.236658	0.211151
1.37331	0.0321415	1.02253	O15498	FALSE	Synaptobrevin homolog YKT6 OS=Homo sapiens OX=9606	YKT6	-0.0225288	N/D	N/D	N/D	46	8	343	8	198	22.4	6.92	1.63204	1.65082	1.61666	1.68349	1.64484	1.64466	1.6255	1.62689	1.6012
0.277445	0.191243	1.14175	O15504	FALSE	Nucleoporin NUP42 OS=Homo sapiens OX=9606	NUP42	-0.141747	N/D	N/D	N/D	11	4	39	4	423	44.8	9.19	-1.22821	-1.37095	-1.28922	-1.42954	-1.42331	-1.30044	-1.18679	-2.16501	-2.21385
0.679063	0.0142897	1.00995	O15511	FALSE	Actin-related protein 2/3 complex subunit 5 OS=Homo sapiens OX=9606	ARPC5	-0.00995408	N/D	N/D	N/D	58	9	335	8	151	16.3	5.67	2.53032	2.50404	2.51003	2.5272	2.53249	2.5279	2.51226	2.49306	2.53973
0.169189	0.017193	1.01199	O15514	FALSE	DNA-directed RNA polymerase II subunit RPB4 OS=Homo sapiens OX=9606	POLR2D	-0.0119886	N/D	N/D	N/D	44	5	155	5	142	16.3	4.79	-0.596556	-0.608017	-0.632099	-0.661534	-0.600261	-0.676249	-0.685576	-0.753397	-0.7036
0.144394	0.0272829	1.01909	O15530	TRUE	3-phosphoinositide-dependent protein kinase 1 OS=Homo sapiens OX=9606	PDPK1	-0.019091	N/D	N/D	N/D	26	11	281	11	556	63.1	7.36	-0.190622	-0.129942	-0.08881	-0.267781	-0.0691538	-0.0644894	-0.0637312	-0.159925	-0.333515
0.26692	-0.0450924	0.969228	O15533	TRUE	Tapasin OS=Homo sapiens OX=9606	TAPBP	0.0307723	3.50173	N/D	N/D	18	6	246	6	448	47.5	6.99	0.740404	0.96261	0.899088	0.696164	0.940297	0.743757	0.769422	0.859589	0.799879
1.05162	0.164905	1.12109	O15541	FALSE	E3 ubiquitin-protein ligase RNF113A OS=Homo sapiens OX=9606	RNF113A	-0.121093	N/D	N/D	N/D	27	9	173	9	343	38.8	5.69	-0.805788	-1.0719	-0.766314	-0.6335	-0.619626	-0.715878	-0.764388	-0.672287	-0.84676
0.202367	0.319058	1.24752	O15550	TRUE	Lysine-specific demethylase 6A OS=Homo sapiens OX=9606	KDM6A	-0.247515	N/D	N/D	N/D	5	5	18	1	1401	154.1	7.44	-4.90252	-6.52034	-5.66017	-6.11838	-6.62774	-3.96763	-6.02255	-6.16035	-6.07592
0.341938	0.0254963	1.01783	O43143	TRUE	ATP-dependent RNA helicase DHX15 OS=Homo sapiens OX=9606	DHX15	-0.0178298	N/D	N/D	N/D	49	40	2100	39	795	90.9	7.46	4.84652	4.81439	4.80874	4.81834	4.79077	4.8159	4.76947	4.69444	4.76348
1.11837	-0.07417	0.949888	O43148	FALSE	mRNA cap guanine-N7 methyltransferase OS=Homo sapiens OX=9606	RNMT	0.0501115	3.72226	N/D	N/D	39	15	370	15	476	54.8	6.61	1.57337	1.57885	1.63791	1.58594	1.53877	1.49156	1.64793	1.55385	1.68567
0.411795	0.0487612	1.03438	O43149	TRUE	Zinc finger ZZ-type and EF-hand domain-containing protein 1 OS=Homo sapiens OX=9606	ZZEF1	-0.0343764	N/D	N/D	N/D	13	29	343	29	2961	330.9	5.95	2.66555	2.52241	2.53041	2.65956	2.62876	2.62158	2.60302	2.49319	2.71264
3.47494	0.278379	1.21283	O43156	FALSE	TELO2-interacting protein 1 homolog OS=Homo sapiens OX=9606	TTI1	-0.212831	N/D	N/D	N/D	20	19	350	19	1089	122	5.97	1.93924	1.97562	1.92263	2.30727	2.27173	2.27249	2.10112	2.03905	2.05507
0.0499956	0.00626643	1.00435	O43159	FALSE	Ribosomal RNA-processing protein 8 OS=Homo sapiens OX=9606	RRP8	-0.00435301	N/D	N/D	N/D	18	7	138	7	456	50.7	9.42	-1.24903	-1.32798	-1.44078	-1.33923	-1.34708	-1.30037	-1.39314	-1.32871	-1.27133
0.405757	-0.121354	0.919325	O43164	FALSE	E3 ubiquitin-protein ligase Praja-2 OS=Homo sapiens OX=9606	PJA2	0.0806753	3.94327	N/D	N/D	18	8	99	8	708	78.2	4.39	-1.73971	-1.86767	-1.54515	-1.81341	-1.55088	-1.67566	-1.4414	-1.31793	-1.43992
3.11029	-0.67993	0.624196	O43166	TRUE	Signal-induced proliferation-associated 1-like protein 1 OS=Homo sapiens OX=9606	SIPA1L1	0.375804	4.77964	3.30028	N/D	6	9	40	8	1804	199.9	8.19	-2.12445	-2.41807	-2.49203	-3.20553	-2.95409	-3.04897	-2.66858	-2.29847	-2.33599
0.562219	0.13167	1.09556	O43167	FALSE	Zinc finger and BTB domain-containing protein 24 OS=Homo sapiens OX=9606	ZBTB24	-0.0955608	N/D	N/D	N/D	3	2	31	2	697	78.2	7.61	-0.650152	-0.942072	-0.9284	-0.835937	-0.858287	-0.7782	-0.953393	-1.21275	-1.04809
2.25634	0.120622	1.0872	O43169	FALSE	Cytochrome b5 type B OS=Homo sapiens OX=9606	CYB5B	-0.0872034	N/D	N/D	N/D	52	5	246	5	150	16.7	4.97	2.75709	2.84309	2.78106	2.89497	2.89151	2.95198	2.76502	2.74952	2.85741
0.344873	-0.0276875	0.980991	O43172	FALSE	U4/U6 small nuclear ribonucleoprotein Prp4 OS=Homo sapiens OX=9606	PRPF4	0.0190086	3.28728	N/D	N/D	48	21	602	21	522	58.4	7.42	2.93201	2.92738	2.97724	2.91637	2.8812	2.8292	2.84189	2.85849	2.88265
2.45014	0.0812726	1.05795	O43175	FALSE	D-3-phosphoglycerate dehydrogenase OS=Homo sapiens OX=9606	PHGDH	-0.0579508	N/D	N/D	N/D	44	22	1560	22	533	56.6	6.71	4.84843	4.78651	4.81995	4.91527	4.88283	4.91649	4.8624	4.7965	4.82776
1.10862	0.108759	1.0783	O43181	FALSE	NADH dehydrogenase [ubiquinone] iron-sulfur protein 4, mitochondrial OS=Homo sapiens OX=9606	NDUFS4	-0.0783006	N/D	N/D	N/D	20	3	110	3	175	20.1	10.3	-0.592421	-0.632338	-0.72183	-0.507573	-0.594785	-0.418882	-0.5572	-0.536125	-0.655123
0.80417	-0.197553	0.872028	O43237	TRUE	Cytoplasmic dynein 1 light intermediate chain 2 OS=Homo sapiens OX=9606	DYNC1LI2	0.127972	4.16658	58.2688	N/D	36	11	183	10	492	54.1	6.38	-0.559801	-0.760008	-0.786722	-1.19297	-0.879945	-1.04584	-1.09744	-0.912306	-0.935911
1.95202	0.0766501	1.05457	O43242	FALSE	26S proteasome non-ATPase regulatory subunit 3 OS=Homo sapiens OX=9606	PSMD3	-0.0545666	N/D	N/D	N/D	59	35	1410	35	534	60.9	8.44	4.40539	4.4421	4.46586	4.53495	4.4739	4.48374	4.37702	4.40668	4.42823
2.68153	0.0948453	1.06795	O43252	FALSE	Bifunctional 3'-phosphoadenosine 5'-phosphosulfate synthase 1 OS=Homo sapiens OX=9606	PAPSS1	-0.0679509	N/D	N/D	N/D	50	27	847	27	624	70.8	6.86	3.06004	3.10097	3.09372	3.2286	3.15601	3.18502	3.07618	3.11325	3.12605
0.085949	-0.00797447	0.994488	O43255	TRUE	E3 ubiquitin-protein ligase SIAH2 OS=Homo sapiens OX=9606	SIAH2	0.00551223	2.74373	N/D	N/D	3	1	8	1	324	34.6	7.12	4.11533	4.16451	4.11012	4.11738	4.13573	4.21046	4.21692	4.15007	4.21802
0.82378	-0.196453	0.872693	O43257	FALSE	Zinc finger HIT domain-containing protein 1 OS=Homo sapiens OX=9606	ZNHIT1	0.127307	4.16399	62.0783	N/D	15	1	21	1	154	17.5	9.41	-3.57774	-3.87532	-3.99229	-4.12068	-3.87033	-4.08084	-4.05491	-3.79933	-3.66539
2.31253	0.15973	1.11708	O43264	FALSE	Centromere/kinetochore protein zw10 homolog OS=Homo sapiens OX=9606	ZW10	-0.117078	N/D	N/D	N/D	37	26	580	26	779	88.8	6.27	1.16428	1.26301	1.32714	1.46512	1.46145	1.3819	1.29163	1.30894	1.30356
0.11125	0.00486135	1.00338	O43290	FALSE	U4/U6.U5 tri-snRNP-associated protein 1 OS=Homo sapiens OX=9606	SART1	-0.00337532	N/D	N/D	N/D	43	33	834	33	800	90.2	6.13	3.34869	3.33938	3.296	3.32682	3.35547	3.32069	3.34821	3.34443	3.30011
0.417155	0.130151	1.09441	O43292	FALSE	Glycosylphosphatidylinositol anchor attachment 1 protein OS=Homo sapiens OX=9606	GPAA1	-0.094408	N/D	N/D	N/D	9	5	79	5	621	67.6	8.06	-0.781086	-1.09944	-1.03729	-1.19184	-0.706397	-0.740969	-0.894107	-1.00909	-1.23832
0.289498	0.259038	1.19668	O43293	FALSE	Death-associated protein kinase 3 OS=Homo sapiens OX=9606	DAPK3	-0.196681	N/D	N/D	N/D	7	3	6	3	454	52.5	6.89	-2.95345	-3.04277	-4.3374	-3.74361	-3.01441	-2.9817	-3.10419	-3.61203	-3.98383
0.290772	-0.431362	0.741561	O43296	FALSE	Zinc finger protein 264 OS=Homo sapiens OX=9606	ZNF264	0.258439	4.54221	5.27833	N/D	11	4	9	3	627	70.5	7.49	-5.53167	-5.52008	-5.27135	-4.84553	-5.98482	-5.46421	-3.31911	-5.98313	-4.3756
0.153111	-0.0220428	0.984837	O43299	FALSE	AP-5 complex subunit zeta-1 OS=Homo sapiens OX=9606	AP5Z1	0.0151627	3.18741	N/D	N/D	2	2	9	2	807	88.5	7.01	-3.40686	-3.45592	-3.53052	-3.53543	-3.53683	-3.37904	-3.42839	-3.56762	-3.38102
0.173865	-0.123163	0.918172	O43303	FALSE	Centriolar coiled-coil protein of 110 kDa OS=Homo sapiens OX=9606	CCP110	0.0818278	3.94998	N/D	N/D	6	4	20	4	1012	113.4	8.65	-3.45765	-2.52296	-3.63268	-3.30412	-3.37535	-3.14322	-3.5505	-2.80068	-2.94194
0.828664	0.386571	1.30728	O43310	TRUE	CBP80/20-dependent translation initiation factor OS=Homo sapiens OX=9606	CTIF	-0.307283	N/D	N/D	N/D	5	3	9	3	598	67.5	6.54	-3.91178	-4.13347	-3.56676	-3.0915	-3.21936	-3.23544	-3.20152	-3.47805	-3.12045
4.81211	-0.377929	0.769542	O43314	TRUE	Inositol hexakisphosphate and diphosphoinositol-pentakisphosphate kinase 2 OS=Homo sapiens OX=9606	PPIP5K2	0.230458	4.47636	6.35232	N/D	15	16	271	16	1243	140.3	8.22	0.182987	0.180355	0.28385	-0.235356	-0.164496	-0.137655	0.175788	0.230974	0.138603
0.688604	-0.0920838	0.938167	O43318	TRUE	Mitogen-activated protein kinase kinase kinase 7 OS=Homo sapiens OX=9606	MAP3K7	0.0618333	3.81894	N/D	N/D	18	9	126	9	606	67.2	7.11	-1.08297	-1.00551	-1.02194	-1.14765	-1.22241	-0.924685	-0.940452	-1.02432	-0.961805
2.47284	0.133499	1.09695	O43324	FALSE	Eukaryotic translation elongation factor 1 epsilon-1 OS=Homo sapiens OX=9606	EEF1E1	-0.0969509	N/D	N/D	N/D	47	8	288	8	174	19.8	8.54	2.38012	2.43232	2.43418	2.50035	2.50471	2.56025	2.30748	2.3749	2.40061
3.39756	-0.265009	0.832193	O43379	FALSE	WD repeat-containing protein 62 OS=Homo sapiens OX=9606	WDR62	0.167807	4.30459	13.0634	N/D	18	21	293	21	1518	165.8	5.91	0.841196	0.821203	0.792503	0.530057	0.456985	0.669254	0.803561	0.822998	0.821186
1.13459	0.0589449	1.0417	O43390	TRUE	Heterogeneous nuclear ribonucleoprotein R OS=Homo sapiens OX=9606	HNRNPR	-0.0417036	N/D	N/D	N/D	51	29	2919	20	633	70.9	8.13	5.01125	4.93598	4.94816	4.98593	5.00979	4.97525	4.90909	4.88659	4.89717
0.600011	-0.0553021	0.962393	O43395	FALSE	U4/U6 small nuclear ribonucleoprotein Prp3 OS=Homo sapiens OX=9606	PRPF3	0.0376071	3.59192	N/D	N/D	34	21	667	21	683	77.5	9.5	2.95192	2.89961	2.89758	2.93731	2.89285	2.76045	2.86757	2.90251	2.99385
0.698658	0.0201049	1.01403	O43396	FALSE	Thioredoxin-like protein 1 OS=Homo sapiens OX=9606	TXNL1	-0.0140332	N/D	N/D	N/D	62	14	711	14	289	32.2	4.96	3.07337	3.04994	3.04336	3.08712	3.09704	3.04642	3.07024	3.03368	3.06992
2.09494	0.0728656	1.0518	O43399	FALSE	Tumor protein D54 OS=Homo sapiens OX=9606	TPD52L2	-0.0518038	N/D	N/D	N/D	69	14	651	14	206	22.2	5.36	3.13856	3.15733	3.18051	3.24136	3.26392	3.2219	3.18017	3.14105	3.21955
0.282181	0.115849	1.08361	O43402	FALSE	ER membrane protein complex subunit 8 OS=Homo sapiens OX=9606	EMC8	-0.0836128	N/D	N/D	N/D	49	8	264	8	210	23.8	6.4	-0.0626068	0.529467	0.154203	0.622991	0.113099	0.570061	0.400649	0.450155	0.445337
0.0262578	0.00304715	1.00211	O43414	FALSE	ERI1 exoribonuclease 3 OS=Homo sapiens OX=9606	ERI3	-0.00211435	N/D	N/D	N/D	13	4	98	4	337	37.2	8.07	-0.21711	-0.193771	-0.217403	-0.243325	-0.249999	-0.267303	-0.277362	-0.377264	-0.256628
0.625652	0.301037	1.23203	O43422	FALSE	52 kDa repressor of the inhibitor of the protein kinase OS=Homo sapiens OX=9606	THAP12	-0.23203	N/D	N/D	N/D	8	5	44	5	761	87.6	5.86	-2.71454	-2.87373	-2.5391	-2.69515	-2.44401	-2.49864	-3.32208	-3.25345	-2.37894
4.59095	-1.27745	0.412523	O43426	TRUE	Synaptojanin-1 OS=Homo sapiens OX=9606	SYNJ1	0.587477	5.15354	2.2112	5.15354	3	5	16	5	1573	173	7.42	-2.33197	-2.68699	-2.49751	-3.49238	-4.03647	-3.79789	-2.41787	-2.63025	-2.42417
4.6818	-0.497007	0.708575	O43427	FALSE	Acidic fibroblast growth factor intracellular-binding protein OS=Homo sapiens OX=9606	FIBP	0.291425	4.61414	4.4545	4.61414	22	8	180	8	364	41.9	6.48	-0.0185184	-0.109587	-0.0967293	-0.511664	-0.52669	-0.707136	-0.1237	-0.0359268	-0.124477
0.445521	0.0355995	1.02498	O43432	TRUE	Eukaryotic translation initiation factor 4 gamma 3 OS=Homo sapiens OX=9606	EIF4G3	-0.0249827	N/D	N/D	N/D	16	25	563	20	1585	176.5	5.38	2.17966	2.06437	2.12139	2.08505	2.16446	2.16162	2.13468	2.03342	2.07514
0.545379	-0.188143	0.877735	O43439	TRUE	Protein CBFA2T2 OS=Homo sapiens OX=9606	CBFA2T2	0.122265	4.14394	124.111	N/D	3	2	15	1	604	67.1	8.05	-4.37741	-4.06293	-4.55162	-4.45018	-4.67988	-4.83557	-4.51006	-4.80344	-4.49694
0.71471	0.0706395	1.05018	O43447	FALSE	Peptidyl-prolyl cis-trans isomerase H OS=Homo sapiens OX=9606	PPIH	-0.0501821	N/D	N/D	N/D	59	11	519	11	177	19.2	8.07	2.63125	2.49877	2.48923	2.60078	2.67563	2.5594	2.46952	2.52455	2.63445
0.284553	0.0747981	1.05321	O43464	FALSE	Serine protease HTRA2, mitochondrial OS=Homo sapiens OX=9606	HTRA2	-0.0532136	N/D	N/D	N/D	10	4	89	4	458	48.8	10.07	0.730766	0.311031	0.798592	0.752301	0.781371	0.735605	0.782722	0.725025	0.741631
2.12633	-0.208885	0.865205	O43482	FALSE	Protein Mis18-beta OS=Homo sapiens OX=9606	OIP5	0.134795	4.19255	35.9196	N/D	20	5	116	5	229	24.7	7.37	-1.13162	-0.984488	-0.971273	-1.33096	-1.1959	-1.26354	-1.12146	-0.979437	-1.13921
0.528476	-0.0808473	0.945502	O43488	FALSE	Aflatoxin B1 aldehyde reductase member 2 OS=Homo sapiens OX=9606	AKR7A2	0.0544978	3.76072	N/D	N/D	40	13	555	13	359	39.6	7.17	2.56403	2.31359	2.29177	2.25139	2.21574	2.27682	2.23686	2.26905	2.29768
0.954341	-0.100622	0.932631	O43491	FALSE	Band 4.1-like protein 2 OS=Homo sapiens OX=9606	EPB41L2	0.0673692	3.85875	N/D	N/D	36	35	1047	35	1005	112.5	5.44	3.52111	3.39172	3.35979	3.26618	3.2768	3.26685	3.36178	3.23242	3.35659
0.0270936	-0.00233094	0.998386	O43493	TRUE	Trans-Golgi network integral membrane protein 2 OS=Homo sapiens OX=9606	TGOLN2	0.00161438	2.20871	N/D	N/D	16	6	166	6	437	45.9	5.63	-2.41798	-2.47283	-2.45574	-2.41154	-2.4123	-2.40924	-2.38736	-2.37519	-2.34308
1.25418	-0.101155	0.932286	O43502	FALSE	DNA repair protein RAD51 homolog 3 OS=Homo sapiens OX=9606	RAD51C	0.067714	3.86113	N/D	N/D	12	4	19	4	376	42.2	6.74	-2.24874	-2.26766	-2.35707	-2.39513	-2.36603	-2.48117	-2.26156	-2.40694	-2.33577
0.625662	0.221224	1.16572	O43504	FALSE	Ragulator complex protein LAMTOR5 OS=Homo sapiens OX=9606	LAMTOR5	-0.165722	N/D	N/D	N/D	33	2	26	2	91	9.6	4.87	-1.41957	-0.972939	-0.879274	-0.668038	-0.612926	-0.735518	-0.729724	-0.680065	-0.678738
0.899484	0.291142	1.22361	O43505	TRUE	Beta-1,4-glucuronyltransferase 1 OS=Homo sapiens OX=9606	B4GAT1	-0.223608	N/D	N/D	N/D	12	5	41	5	415	47.1	7.2	-2.0692	-2.68208	-2.08552	-1.99994	-2.20845	-1.99591	-2.45682	-2.63203	-2.22979
0.0936357	-0.0366314	0.974929	O43513	TRUE	Mediator of RNA polymerase II transcription subunit 7 OS=Homo sapiens OX=9606	MED7	0.0250713	3.4102	N/D	N/D	17	2	6	2	233	27.2	5.78	-4.14617	-3.9066	-3.87486	-4.136	-4.30579	-3.92741	-4.40424	-4.22624	-3.9605
6.90668	-2.09316	0.234366	O43516	TRUE	WAS/WASL-interacting protein family member 1 OS=Homo sapiens OX=9606	WIPF1	0.765634	5.51413	1.82269	5.51413	28	9	104	9	503	51.2	11.47	-0.836927	-0.828814	-0.823349	-2.68276	-3.16006	-2.86184	-0.783633	-0.876192	-0.701424
1.59879	0.156757	1.11478	O43521	FALSE	Bcl-2-like protein 11 OS=Homo sapiens OX=9606	BCL2L11	-0.114779	N/D	N/D	N/D	6	1	1	1	198	22.2	8.21	-1.70099	-1.63859	-1.69159	-1.53846	-1.51677	-1.4791	-1.79864	-1.65726	-1.52213
0.0378903	0.0289655	1.02028	O43542	FALSE	DNA repair protein XRCC3 OS=Homo sapiens OX=9606	XRCC3	-0.0202802	N/D	N/D	N/D	4	1	3	1	346	37.8	8.48	-4.64177	-4.75317	-5.20469	-4.3127	-5.31591	-4.56565	-4.57129	-5.00643	-4.38498
1.36045	0.0980401	1.07032	O43561	FALSE	Linker for activation of T-cells family member 1 OS=Homo sapiens OX=9606	LAT	-0.0703185	N/D	N/D	N/D	16	3	74	3	262	27.9	4.39	-2.3124	-2.22437	-2.33387	-2.12665	-2.19501	-2.22896	-2.24334	-2.35236	-2.22313
0.251218	0.0246301	1.01722	O43566	FALSE	Regulator of G-protein signaling 14 OS=Homo sapiens OX=9606	RGS14	-0.0172188	N/D	N/D	N/D	15	7	116	7	566	61.4	8.19	0.868237	0.912176	0.840885	0.897355	0.859044	1.01535	0.9327	0.882662	0.959059
1.75541	0.0952385	1.06824	O43572	TRUE	A-kinase anchor protein 10, mitochondrial OS=Homo sapiens OX=9606	AKAP10	-0.068242	N/D	N/D	N/D	10	6	29	6	662	73.8	6.39	0.982393	1.00576	1.07538	1.1656	1.11721	1.12076	1.08073	0.998928	1.09252
0.00060103	0.000135581	1.00009	O43583	FALSE	Density-regulated protein OS=Homo sapiens OX=9606	DENR	-9.39818e-05	N/D	N/D	N/D	45	9	356	9	198	22.1	5.3	2.65819	2.67315	2.61977	2.64149	2.83608	2.57111	2.56473	2.80358	2.77713
1.12923	0.0711026	1.05052	O43592	FALSE	Exportin-T OS=Homo sapiens OX=9606	XPOT	-0.0505193	N/D	N/D	N/D	23	21	716	21	962	109.9	5.39	2.58834	2.57384	2.62276	2.59997	2.72188	2.63925	2.57057	2.62561	2.51447
0.262836	0.0269901	1.01888	O43598	FALSE	2'-deoxynucleoside 5'-phosphate N-hydrolase 1 OS=Homo sapiens OX=9606	DNPH1	-0.0188842	N/D	N/D	N/D	11	3	135	3	174	19.1	5.05	0.355476	0.433636	0.313469	0.397061	0.395198	0.325258	0.296494	0.264387	0.409632
0.577835	-0.135659	0.910254	O43615	FALSE	Mitochondrial import inner membrane translocase subunit TIM44 OS=Homo sapiens OX=9606	TIMM44	0.0897459	3.99385	N/D	N/D	40	19	639	19	452	51.3	8.32	2.33904	2.42362	2.58121	2.32985	2.28913	2.64148	2.67486	2.64228	2.67386
1.00701	0.158427	1.11607	O43617	FALSE	Trafficking protein particle complex subunit 3 OS=Homo sapiens OX=9606	TRAPPC3	-0.11607	N/D	N/D	N/D	41	8	245	8	180	20.3	4.96	1.57656	1.53473	1.84045	1.64248	1.88587	1.85037	1.58638	1.5888	1.67996
0.747795	0.0617379	1.04372	O43633	FALSE	Charged multivesicular body protein 2a OS=Homo sapiens OX=9606	CHMP2A	-0.0437223	N/D	N/D	N/D	23	7	144	6	222	25.1	5.97	0.347713	0.279186	0.287216	0.2697	0.345044	0.3234	0.186482	0.219746	0.185518
0.994617	-0.0991639	0.933574	O43639	FALSE	Cytoplasmic protein NCK2 OS=Homo sapiens OX=9606	NCK2	0.0664261	3.85219	N/D	N/D	28	9	225	6	380	42.9	6.95	-0.924904	-0.88382	-0.983694	-0.984038	-1.04178	-0.923708	-0.929942	-0.772821	-0.80888
0.730457	-0.0665685	0.954907	O43660	TRUE	Pleiotropic regulator 1 OS=Homo sapiens OX=9606	PLRG1	0.0450934	3.67415	N/D	N/D	54	23	883	23	514	57.2	9.17	2.99635	2.99843	2.98152	2.96577	2.86081	2.87706	2.89438	2.88099	3.05501
6.10772	-1.35103	0.392013	O43663	TRUE	Protein regulator of cytokinesis 1 OS=Homo sapiens OX=9606	PRC1	0.607987	5.19059	2.15395	5.19059	20	12	263	11	620	71.6	6.68	-0.5147	-0.345041	-0.505463	-1.89482	-1.97026	-1.69248	-0.43072	-0.642534	-0.570513
0.809202	0.188584	1.13964	O43665	FALSE	Regulator of G-protein signaling 10 OS=Homo sapiens OX=9606	RGS10	-0.139644	N/D	N/D	N/D	46	7	197	7	181	21.2	7.49	0.0329647	0.00946236	-0.353935	0.144633	0.0934191	0.111706	0.127061	0.0385647	-0.286104
0.300332	0.0379313	1.02664	O43670	FALSE	BUB3-interacting and GLEBS motif-containing protein ZNF207 OS=Homo sapiens OX=9606	ZNF207	-0.0266406	N/D	N/D	N/D	13	7	213	7	478	50.7	9.1	1.77268	1.85312	1.84505	1.78777	1.88705	1.76573	1.70804	1.81882	1.65578
0.681693	0.0547957	1.03871	O43674	FALSE	NADH dehydrogenase [ubiquinone] 1 beta subcomplex subunit 5, mitochondrial OS=Homo sapiens OX=9606	NDUFB5	-0.038712	N/D	N/D	N/D	26	5	202	5	189	21.7	9.63	0.207779	0.164722	0.244343	0.177485	0.303958	0.302523	0.19855	0.275204	0.14856
0.346433	-0.0443619	0.969719	O43676	FALSE	NADH dehydrogenase [ubiquinone] 1 beta subcomplex subunit 3 OS=Homo sapiens OX=9606	NDUFB3	0.0302814	3.49453	N/D	N/D	18	2	136	2	98	11.4	9.2	-0.733559	-0.71184	-0.721069	-0.67616	-0.711553	-0.866049	-0.577691	-0.720129	-0.777063
2.07448	-0.221785	0.857504	O43678	FALSE	NADH dehydrogenase [ubiquinone] 1 alpha subcomplex subunit 2 OS=Homo sapiens OX=9606	NDUFA2	0.142496	4.22057	25.2322	N/D	41	4	103	4	99	10.9	9.57	0.725716	0.828724	0.786329	0.669976	0.593579	0.598192	1.01504	0.819077	0.879316
0.336471	0.045472	1.03202	O43681	FALSE	ATPase GET3 OS=Homo sapiens OX=9606	GET3	-0.0320208	N/D	N/D	N/D	34	9	243	9	348	38.8	4.91	1.73067	1.87091	1.60695	1.8391	1.76754	1.83031	1.79563	1.75387	1.84304
0.10819	0.0131049	1.00913	O43683	FALSE	Mitotic checkpoint serine/threonine-protein kinase BUB1 OS=Homo sapiens OX=9606	BUB1	-0.00912502	N/D	N/D	N/D	32	29	534	29	1085	122.3	6.47	1.34026	1.39533	1.3977	1.26384	1.37407	1.38288	1.2782	1.30823	1.24322
2.73756	0.067054	1.04758	O43684	FALSE	Mitotic checkpoint protein BUB3 OS=Homo sapiens OX=9606	BUB3	-0.0475753	N/D	N/D	N/D	61	16	911	16	328	37.1	6.84	4.10023	4.08517	4.09432	4.15567	4.15429	4.18087	4.10142	4.06724	4.13095
2.25613	0.0792969	1.0565	O43707	FALSE	Alpha-actinin-4 OS=Homo sapiens OX=9606	ACTN4	-0.056503	N/D	N/D	N/D	66	53	2702	35	911	104.8	5.44	4.16595	4.18769	4.20948	4.26529	4.22996	4.24436	4.11638	4.15275	4.17119
0.926069	0.0930645	1.06663	O43708	TRUE	Maleylacetoacetate isomerase OS=Homo sapiens OX=9606	GSTZ1	-0.0666334	N/D	N/D	N/D	15	3	97	3	216	24.2	8.54	-1.09633	-0.898365	-1.04727	-0.872743	-1.00154	-0.977943	-1.03419	-1.09136	-1.09532
3.8337	-0.0995447	0.933328	O43709	FALSE	Probable 18S rRNA (guanine-N(7))-methyltransferase OS=Homo sapiens OX=9606	BUD23	0.0666725	3.85391	N/D	N/D	23	9	202	9	281	31.9	8.73	-0.0625134	-0.0386543	-0.0248203	-0.126761	-0.15128	-0.174759	-0.0692492	-0.055479	-0.0576172
0.137001	0.0631757	1.04476	O43715	FALSE	TP53-regulated inhibitor of apoptosis 1 OS=Homo sapiens OX=9606	TRIAP1	-0.044763	N/D	N/D	N/D	46	3	95	3	76	8.8	5.48	-1.95012	-2.04228	-2.06784	-1.47719	-1.87158	-1.83615	-1.49596	-1.65947	-1.53323
0.140375	0.0600915	1.04253	O43716	FALSE	Glutamyl-tRNA(Gln) amidotransferase subunit C, mitochondrial OS=Homo sapiens OX=9606	GATC	-0.0425319	N/D	N/D	N/D	36	4	183	4	136	15.1	5.05	0.0827465	0.0950413	0.0644169	0.168422	0.204003	0.213856	-0.0181265	0.674124	-0.0861893
3.10528	0.10001	1.07178	O43719	FALSE	HIV Tat-specific factor 1 OS=Homo sapiens OX=9606	HTATSF1	-0.0717812	N/D	N/D	N/D	55	43	1062	43	755	85.8	4.4	3.30555	3.33992	3.37228	3.46323	3.44647	3.42905	3.37515	3.32522	3.3593
0.606936	-0.0629245	0.957322	O43736	FALSE	Integral membrane protein 2A OS=Homo sapiens OX=9606	ITM2A	0.0426785	3.64915	N/D	N/D	22	6	98	6	263	29.7	5.8	0.0601997	-0.012907	0.0720997	-0.0568285	0.0597296	0.0871449	0.156325	0.111368	0.170553
1.70651	0.090611	1.06482	O43747	TRUE	AP-1 complex subunit gamma-1 OS=Homo sapiens OX=9606	AP1G1	-0.064821	N/D	N/D	N/D	28	24	965	23	822	91.3	6.8	3.03422	3.02007	3.01768	3.07259	3.08582	3.10344	3.03539	2.91366	2.95903
0.0369984	-0.0152027	0.989518	O43752	FALSE	Syntaxin-6 OS=Homo sapiens OX=9606	STX6	0.0104824	3.02504	N/D	N/D	19	5	79	4	255	29.2	4.93	-2.61267	-2.53323	-2.72489	-3.02161	-2.31644	-2.55601	-2.68384	-2.60217	-2.54009
0.00927687	-0.00100247	0.999305	O43760	FALSE	Synaptogyrin-2 OS=Homo sapiens OX=9606	SYNGR2	0.000694618	1.84205	N/D	N/D	21	5	178	5	224	24.8	4.94	0.37991	0.28285	0.285833	0.357594	0.25365	0.256775	0.233195	0.287331	0.272934
0.266216	0.0418363	1.02942	O43765	FALSE	Small glutamine-rich tetratricopeptide repeat-containing protein alpha OS=Homo sapiens OX=9606	SGTA	-0.0294232	N/D	N/D	N/D	42	12	682	12	313	34	4.87	4.81479	4.79575	4.83018	4.99059	4.92414	4.92205	4.94926	4.97077	5.06181
0.656508	0.049931	1.03522	O43768	FALSE	Alpha-endosulfine OS=Homo sapiens OX=9606	ENSA	-0.0352154	N/D	N/D	N/D	68	7	411	6	121	13.4	7.24	1.4627	1.37131	1.47593	1.49345	1.51531	1.55015	1.54853	1.4528	1.50696
0.175052	0.0502597	1.03545	O43772	TRUE	Mitochondrial carnitine/acylcarnitine carrier protein OS=Homo sapiens OX=9606	SLC25A20	-0.0354513	N/D	N/D	N/D	33	9	91	9	301	32.9	9.41	-0.610573	-0.374559	-0.424265	-0.322164	-0.53745	-0.129	-0.210416	-0.376118	-0.282854
3.39957	0.0908659	1.06501	O43776	TRUE	Asparagine--tRNA ligase, cytoplasmic OS=Homo sapiens OX=9606	NARS1	-0.0650092	N/D	N/D	N/D	36	24	1181	24	548	62.9	6.25	3.72082	3.76628	3.73882	3.84198	3.8555	3.80398	3.75132	3.72728	3.75319
0.159856	0.00626008	1.00435	O43795	FALSE	Unconventional myosin-Ib OS=Homo sapiens OX=9606	MYO1B	-0.00434858	N/D	N/D	N/D	26	27	732	27	1136	131.9	9.38	2.50039	2.49416	2.48032	2.4851	2.45437	2.52048	2.47468	2.46915	2.46363
0.663462	0.333402	1.25998	O43805	FALSE	Sjoegren syndrome nuclear autoantigen 1 OS=Homo sapiens OX=9606	SSNA1	-0.259981	N/D	N/D	N/D	16	2	45	2	119	13.6	5.38	-2.3386	-2.28166	-2.13562	-2.28837	-2.39472	-2.15461	-2.87604	-3.01706	-3.02682
0.0383336	0.00962559	1.00669	O43808	FALSE	Peroxisomal membrane protein PMP34 OS=Homo sapiens OX=9606	SLC25A17	-0.00669426	N/D	N/D	N/D	12	4	128	4	307	34.5	10.08	-0.721798	-0.569094	-0.74054	-0.780356	-0.696534	-0.767084	-0.673272	-0.974821	-0.866179
3.15867	-0.230177	0.85253	O43809	FALSE	Cleavage and polyadenylation specificity factor subunit 5 OS=Homo sapiens OX=9606	NUDT21	0.14747	4.23799	21.2294	N/D	52	14	487	14	227	26.2	8.82	3.50861	3.59369	3.555	3.28128	3.29539	3.24205	3.45277	3.49037	3.41805
4.92579	0.242109	1.18272	O43813	FALSE	Glutathione S-transferase LANCL1 OS=Homo sapiens OX=9606	LANCL1	-0.18272	N/D	N/D	N/D	34	12	471	12	399	45.3	7.75	1.62981	1.60235	1.56585	1.81277	1.83379	1.89488	1.63091	1.61417	1.58714
1.44919	-0.11429	0.923837	O43815	FALSE	Striatin OS=Homo sapiens OX=9606	STRN	0.076163	3.91615	N/D	N/D	33	19	255	18	780	86.1	5.27	0.916555	1.04333	0.909832	0.782527	0.88786	0.883688	1.04267	0.96579	0.915712
0.516538	0.0296801	1.02079	O43818	TRUE	U3 small nucleolar RNA-interacting protein 2 OS=Homo sapiens OX=9606	RRP9	-0.0207857	N/D	N/D	N/D	34	16	393	16	475	51.8	7.85	0.81279	0.818611	0.921318	0.900056	0.864472	0.856678	0.856582	0.845884	0.809147
1.4372	-0.0860314	0.942111	O43819	FALSE	Protein SCO2 homolog, mitochondrial OS=Homo sapiens OX=9606	SCO2	0.0578893	3.7885	N/D	N/D	23	5	71	5	266	29.8	8.85	-1.19094	-1.15113	-1.28188	-1.30274	-1.32696	-1.28087	-1.28187	-1.21507	-1.18408
0.0338327	0.0121245	1.00844	O43822	FALSE	Cilia- and flagella-associated protein 410 OS=Homo sapiens OX=9606	CFAP410	-0.0084395	N/D	N/D	N/D	11	2	2	2	256	28.3	7.34	-2.2585	-2.68712	-2.80591	-2.57104	-2.69442	-2.60238	-2.8169	-2.64243	-2.59758
0.285839	-0.057459	0.960955	O43823	TRUE	A-kinase anchor protein 8 OS=Homo sapiens OX=9606	AKAP8	0.0390449	3.60886	N/D	N/D	34	16	234	16	692	76.1	5.15	0.214474	0.13809	0.0939503	-0.0310259	0.157687	-0.101923	0.0360746	0.028204	-0.116562
0.375915	0.13999	1.1019	O43824	TRUE	Putative GTP-binding protein 6 OS=Homo sapiens OX=9606	GTPBP6	-0.101897	N/D	N/D	N/D	6	3	34	3	516	56.9	9.42	-3.43927	-2.93461	-3.5316	-3.21518	-3.28776	-3.33043	-3.55569	-3.72341	-3.32209
0.486909	0.535557	1.4495	O43829	FALSE	Zinc finger and BTB domain-containing protein 14 OS=Homo sapiens OX=9606	ZBTB14	-0.449502	N/D	N/D	N/D	2	1	13	1	449	50.9	6.04	-6.13457	-6.05203	-5.75316	-5.92793	-3.88039	-6.25194	-5.77055	-6.09476	-5.52879
3.03152	0.168059	1.12355	O43837	FALSE	Isocitrate dehydrogenase [NAD] subunit beta, mitochondrial OS=Homo sapiens OX=9606	IDH3B	-0.123546	N/D	N/D	N/D	48	18	856	18	385	42.2	8.46	2.8	2.84597	2.83305	2.95129	2.94327	2.95561	2.73157	2.74884	2.73256
3.17054	0.126755	1.09184	O43847	FALSE	Nardilysin OS=Homo sapiens OX=9606	NRDC	-0.0918353	N/D	N/D	N/D	33	34	1020	34	1151	131.6	4.98	3.32157	3.40108	3.36868	3.48581	3.47122	3.50681	3.31545	3.375	3.38538
0.340618	0.039262	1.02759	O43852	FALSE	Calumenin OS=Homo sapiens OX=9606	CALU	-0.027588	N/D	N/D	N/D	55	15	701	15	315	37.1	4.64	3.03156	2.79905	3.00073	2.98522	3.02221	2.99039	2.96913	2.96596	2.99364
1.63793	-0.959925	0.514084	O43861	TRUE	Probable phospholipid-transporting ATPase IIB OS=Homo sapiens OX=9606	ATP9B	0.485916	4.97553	2.58217	N/D	2	2	3	2	1147	129.2	7.61	-3.46845	-3.00564	-2.55377	-3.47622	-4.58123	-4.54502	-3.40994	-3.52193	-3.48567
0.185854	0.015986	1.01114	O43865	TRUE	S-adenosylhomocysteine hydrolase-like protein 1 OS=Homo sapiens OX=9606	AHCYL1	-0.0111422	N/D	N/D	N/D	34	20	808	8	530	58.9	6.89	1.31283	1.28937	1.31632	1.36593	1.26013	1.34225	1.31523	1.37213	1.23483
0.072591	-0.0355436	0.975664	O43903	FALSE	Growth arrest-specific protein 2 OS=Homo sapiens OX=9606	GAS2	0.0243359	3.39695	N/D	N/D	27	7	235	7	313	34.9	8.47	-0.219259	-0.315042	-0.353189	-0.372062	-0.711625	-0.324867	-0.323655	-0.951462	-0.441238
1.10198	0.0422498	1.02972	O43913	FALSE	Origin recognition complex subunit 5 OS=Homo sapiens OX=9606	ORC5	-0.0297184	N/D	N/D	N/D	25	9	191	9	435	50.3	7.74	-0.0615864	-0.0430584	-0.0990925	0.00918102	-0.00670528	-0.0672493	-0.0818682	-0.0385017	-0.058939
2.75648	-0.219046	0.859133	O43920	FALSE	NADH dehydrogenase [ubiquinone] iron-sulfur protein 5 OS=Homo sapiens OX=9606	NDUFS5	0.140867	4.21475	26.9105	N/D	52	5	157	5	106	12.5	9.14	-0.650082	-0.626122	-0.671907	-0.95263	-0.950587	-0.79249	-0.654418	-0.735664	-0.738943
0.341838	0.0355878	1.02497	O43924	FALSE	Retinal rod rhodopsin-sensitive cGMP 3',5'-cyclic phosphodiesterase subunit delta OS=Homo sapiens OX=9606	PDE6D	-0.0249743	N/D	N/D	N/D	25	3	111	3	150	17.4	5.67	-0.14456	-0.249729	-0.193836	-0.138379	-0.193702	-0.209457	-0.127738	-0.290089	-0.290651
0.223795	0.0540051	1.03814	O43929	FALSE	Origin recognition complex subunit 4 OS=Homo sapiens OX=9606	ORC4	-0.038143	N/D	N/D	N/D	19	7	131	7	436	50.3	8	-0.570107	-0.469395	-0.457117	-0.435998	-0.401761	-0.567923	-0.809533	-0.453249	-0.375994
3.4914	-0.191136	0.875916	O43933	TRUE	Peroxisome biogenesis factor 1 OS=Homo sapiens OX=9606	PEX1	0.124084	4.15125	91.0972	N/D	9	11	146	11	1283	142.8	6.33	1.53921	1.56294	1.52567	1.35771	1.29305	1.35651	1.52738	1.44545	1.56073
0.455015	-0.0864078	0.941865	O60216	FALSE	Double-strand-break repair protein rad21 homolog OS=Homo sapiens OX=9606	RAD21	0.058135	3.79045	N/D	N/D	33	19	541	19	631	71.6	4.65	1.85413	2.02959	2.05861	1.99384	1.75462	1.71302	1.85987	1.80651	1.83271
0.613048	-0.0360122	0.975347	O60220	FALSE	Mitochondrial import inner membrane translocase subunit Tim8 A OS=Homo sapiens OX=9606	TIMM8A	0.0246528	3.40271	N/D	N/D	34	3	92	3	97	11	5.16	-0.279692	-0.307535	-0.312677	-0.283462	-0.279628	-0.356686	-0.218568	-0.273209	-0.231796
1.31518	-0.127952	0.915129	O60231	FALSE	Pre-mRNA-splicing factor ATP-dependent RNA helicase DHX16 OS=Homo sapiens OX=9606	DHX16	0.0848706	3.96728	N/D	N/D	30	27	686	25	1041	119.2	6.8	2.9301	2.89344	2.91181	2.72933	2.74014	2.65615	2.79098	2.75094	2.74168
0.204883	0.0183142	1.01278	O60232	TRUE	Protein ZNRD2 OS=Homo sapiens OX=9606	ZNRD2	-0.0127754	N/D	N/D	N/D	58	8	231	8	199	21.5	5.24	1.32811	1.36735	1.30272	1.36874	1.2647	1.31254	1.22838	1.255	1.30052
0.592071	0.0405777	1.02853	O60234	FALSE	Glia maturation factor gamma OS=Homo sapiens OX=9606	GMFG	-0.0285256	N/D	N/D	N/D	46	5	264	3	142	16.8	5.26	1.06376	1.08404	1.04502	1.15495	1.15099	1.11761	1.17118	1.0764	1.16324
0.302023	0.142521	1.10383	O60238	FALSE	BCL2/adenovirus E1B 19 kDa protein-interacting protein 3-like OS=Homo sapiens OX=9606	BNIP3L	-0.103832	N/D	N/D	N/D	11	2	17	2	219	23.9	5.85	-3.81356	-3.66457	-3.62019	-3.70142	-3.59058	-3.61189	-4.42963	-3.56569	-3.56928
0.0509007	-0.0202181	0.986084	O60244	FALSE	Mediator of RNA polymerase II transcription subunit 14 OS=Homo sapiens OX=9606	MED14	0.0139163	3.14961	N/D	N/D	18	19	232	19	1454	160.5	8.73	0.0945892	0.601074	0.281389	0.17529	0.244739	0.573454	0.509662	0.203074	0.418486
1.09982	0.0616266	1.04364	O60256	FALSE	Phosphoribosyl pyrophosphate synthase-associated protein 2 OS=Homo sapiens OX=9606	PRPSAP2	-0.0436418	N/D	N/D	N/D	43	13	465	11	369	40.9	7.44	2.28213	2.27498	2.27645	2.3654	2.25152	2.32754	2.26519	2.1996	2.22079
4.96514	-0.135979	0.910052	O60264	TRUE	SWI/SNF-related matrix-associated actin-dependent regulator of chromatin subfamily A member 5 OS=Homo sapiens OX=9606	SMARCA5	0.0899482	3.99493	N/D	N/D	47	51	1670	51	1052	121.8	8.09	4.2564	4.22669	4.23378	4.09183	4.10074	4.09002	4.239	4.1948	4.2304
0.736156	0.0993336	1.07128	O60271	FALSE	C-Jun-amino-terminal kinase-interacting protein 4 OS=Homo sapiens OX=9606	SPAG9	-0.0712785	N/D	N/D	N/D	32	37	475	37	1321	146.1	5.15	2.27474	2.37208	2.39308	2.33944	2.39011	2.33245	2.20547	2.13904	2.1436
1.2268	-0.121418	0.919284	O60287	TRUE	Nucleolar pre-ribosomal-associated protein 1 OS=Homo sapiens OX=9606	URB1	0.0807164	3.94351	N/D	N/D	11	23	281	23	2271	254.2	6.47	0.188011	0.310457	0.238523	0.047677	0.13746	0.0580387	0.182826	0.0569687	0.238073
0.174444	0.183643	1.13575	O60292	TRUE	Signal-induced proliferation-associated 1-like protein 3 OS=Homo sapiens OX=9606	SIPA1L3	-0.135748	N/D	N/D	N/D	1	2	4	1	1781	194.5	8.32	-6.1739	-5.68452	-6.26377	-6.16808	-6.51402	-4.62009	-5.60938	-6.02921	-5.94547
0.200728	-0.0250223	0.982805	O60293	TRUE	Zinc finger C3H1 domain-containing protein OS=Homo sapiens OX=9606	ZFC3H1	0.0171946	3.24293	N/D	N/D	7	14	116	14	1989	226.2	8.13	2.28247	2.26033	2.26157	2.24987	2.24177	2.3395	2.43774	2.33953	2.23078
0.380198	-0.0651139	0.95587	O60294	FALSE	tRNA wybutosine-synthesizing protein 4 OS=Homo sapiens OX=9606	LCMT2	0.0441301	3.66434	N/D	N/D	5	3	28	3	686	75.6	6.73	-2.44205	-2.50903	-2.42041	-2.40369	-2.49465	-2.59468	-2.49509	-2.50955	-2.21923
0.091907	-0.00886456	0.993874	O60306	TRUE	RNA helicase aquarius OS=Homo sapiens OX=9606	AQR	0.00612561	2.78982	N/D	N/D	31	45	1151	44	1485	171.2	6.37	2.78444	2.81581	2.72338	2.77863	2.72712	2.69942	2.75738	2.66561	2.71689
2.03486	0.103142	1.07411	O60313	FALSE	Dynamin-like 120 kDa protein, mitochondrial OS=Homo sapiens OX=9606	OPA1	-0.0741099	N/D	N/D	N/D	26	24	550	24	960	111.6	7.87	1.60847	1.65141	1.65449	1.74489	1.78943	1.79573	1.70977	1.68236	1.73473
0.217956	-0.0411763	0.971862	O60318	FALSE	Germinal-center associated nuclear protein OS=Homo sapiens OX=9606	MCM3AP	0.0281378	3.46169	N/D	N/D	3	5	34	5	1980	218.3	6.39	-2.13197	-2.09144	-2.29065	-2.16417	-2.35063	-2.29502	-2.24924	-2.40168	-2.20761
0.192395	-0.0197256	0.98642	O60333	TRUE	Kinesin-like protein KIF1B OS=Homo sapiens OX=9606	KIF1B	0.0135797	3.13883	N/D	N/D	6	10	112	10	1816	204.3	5.6	0.271317	0.327	0.332903	0.216729	0.230018	0.397221	0.295833	0.287785	0.291452
1.01961	0.0346096	1.02428	O60341	TRUE	Lysine-specific histone demethylase 1A OS=Homo sapiens OX=9606	KDM1A	-0.0242796	N/D	N/D	N/D	40	32	1050	32	852	92.8	6.52	2.94738	2.95193	2.99039	2.98628	2.96595	2.9818	2.90838	2.91578	2.94655
0.286787	-0.0513034	0.965064	O60343	FALSE	TBC1 domain family member 4 OS=Homo sapiens OX=9606	TBC1D4	0.0349359	3.55872	N/D	N/D	23	26	600	25	1298	146.5	7.01	1.3161	1.16821	1.16875	1.19256	1.03848	1.11533	1.1296	0.973324	1.24457
1.57286	0.108529	1.07813	O60427	FALSE	Acyl-CoA (8-3)-desaturase OS=Homo sapiens OX=9606	FADS1	-0.0781281	N/D	N/D	N/D	19	7	209	7	444	51.9	8.87	0.334721	0.349154	0.277508	0.354806	0.423247	0.395391	0.220403	0.200426	0.313507
0.0926585	0.024706	1.01727	O60476	TRUE	Mannosyl-oligosaccharide 1,2-alpha-mannosidase IB OS=Homo sapiens OX=9606	MAN1A2	-0.0172724	N/D	N/D	N/D	10	5	35	5	641	73	7.61	-2.39323	-2.4704	-2.71129	-2.67875	-2.4478	-2.36596	-2.53757	-2.62389	-2.39689
0.0103392	-0.00235987	0.998366	O60488	TRUE	Long-chain-fatty-acid--CoA ligase 4 OS=Homo sapiens OX=9606	ACSL4	0.0016344	2.21407	N/D	N/D	33	21	545	20	711	79.1	8.38	2.03097	2.05623	1.9586	2.05068	2.16244	2.11113	2.11862	2.19263	2.30562
0.179944	-0.0240312	0.983481	O60493	FALSE	Sorting nexin-3 OS=Homo sapiens OX=9606	SNX3	0.0165192	3.22522	N/D	N/D	51	9	465	7	162	18.8	8.66	1.08104	1.25298	1.31939	1.13486	1.15898	1.20441	1.13446	1.17557	1.17726
0.562954	0.250888	1.18994	O60499	FALSE	Syntaxin-10 OS=Homo sapiens OX=9606	STX10	-0.18994	N/D	N/D	N/D	21	5	68	4	249	28.1	4.89	-1.74075	-1.85869	-1.80745	-1.38011	-1.29068	-1.62123	-1.36947	-1.20016	-2.11284
0.125867	-0.0182459	0.987433	O60502	FALSE	Protein O-GlcNAcase OS=Homo sapiens OX=9606	OGA	0.0125674	3.10474	N/D	N/D	11	10	150	10	916	102.8	4.91	-0.980837	-1.00322	-1.04109	-1.011	-1.10291	-1.01213	-1.17754	-1.01631	-0.923611
0.195834	-0.0284314	0.980486	O60504	FALSE	Vinexin OS=Homo sapiens OX=9606	SORBS3	0.0195142	3.29891	N/D	N/D	24	12	261	12	671	75.3	9.45	0.784096	0.742479	0.720356	0.764024	0.776326	0.73497	0.782069	0.719233	0.972996
1.91135	0.0902104	1.06453	O60506	FALSE	Heterogeneous nuclear ribonucleoprotein Q OS=Homo sapiens OX=9606	SYNCRIP	-0.0645254	N/D	N/D	N/D	50	26	2098	17	623	69.6	8.59	4.52628	4.47408	4.52428	4.61391	4.58356	4.52341	4.4761	4.45263	4.44712
0.608304	-0.0552258	0.962444	O60508	TRUE	Pre-mRNA-processing factor 17 OS=Homo sapiens OX=9606	CDC40	0.0375562	3.59131	N/D	N/D	32	15	438	15	579	65.5	7.06	1.5415	1.52278	1.52187	1.43797	1.44021	1.38679	1.49662	1.36905	1.40947
3.9967	-0.231984	0.851463	O60518	FALSE	Ran-binding protein 6 OS=Homo sapiens OX=9606	RANBP6	0.148537	4.24167	20.5366	N/D	11	11	139	9	1105	124.6	5.01	0.669096	0.55562	0.594183	0.322076	0.366651	0.355436	0.540643	0.557341	0.563349
0.238553	-0.0151744	0.989537	O60524	TRUE	Ribosome quality control complex subunit NEMF OS=Homo sapiens OX=9606	NEMF	0.010463	3.02422	N/D	N/D	19	20	420	20	1076	122.9	6.35	1.78501	1.71107	1.74652	1.70232	1.71908	1.69398	1.67037	1.68035	1.72848
0.34776	0.0250882	1.01754	O60547	FALSE	GDP-mannose 4,6 dehydratase OS=Homo sapiens OX=9606	GMDS	-0.0175419	N/D	N/D	N/D	38	13	378	13	372	41.9	7.31	1.2156	1.28905	1.16362	1.28174	1.19382	1.23065	1.21022	1.17292	1.2105
0.0753849	0.0576841	1.04079	O60551	FALSE	Glycylpeptide N-tetradecanoyltransferase 2 OS=Homo sapiens OX=9606	NMT2	-0.0407937	N/D	N/D	N/D	7	5	113	1	498	56.9	7.58	-4.24394	-3.89935	-4.13444	-4.17128	-4.09273	-4.37182	-4.02904	-5.16379	-4.1472
0.402392	-0.0400481	0.972623	O60563	FALSE	Cyclin-T1 OS=Homo sapiens OX=9606	CCNT1	0.0273775	3.44945	N/D	N/D	28	14	219	13	726	80.6	8.78	0.018837	-0.0130596	-0.0788269	-0.098834	-0.0933199	0.0319176	-0.0490236	-0.0406036	0.0824928
1.46489	-0.0957513	0.935785	O60566	TRUE	Mitotic checkpoint serine/threonine-protein kinase BUB1 beta OS=Homo sapiens OX=9606	BUB1B	0.0642152	3.83646	N/D	N/D	33	28	462	28	1050	119.5	5.27	1.66039	1.67965	1.73853	1.61021	1.65777	1.54055	1.71964	1.63403	1.75932
1.20602	0.127109	1.0921	O60568	TRUE	Multifunctional procollagen lysine hydroxylase and glycosyltransferase LH3 OS=Homo sapiens OX=9606	PLOD3	-0.0921033	N/D	N/D	N/D	1	1	3	1	738	84.7	6.05	-1.34405	-1.30407	-1.50605	-1.36345	-1.28145	-1.22166	-1.39699	-1.51356	-1.43108
0.856259	0.162873	1.11951	O60573	TRUE	Eukaryotic translation initiation factor 4E type 2 OS=Homo sapiens OX=9606	EIF4E2	-0.119514	N/D	N/D	N/D	22	3	33	3	245	28.3	8.88	-0.48411	-0.27573	-0.436197	0.0141172	-0.299701	-0.400351	-0.324235	-0.486717	-0.342117
0.0663788	-0.0950166	0.936261	O60583	FALSE	Cyclin-T2 OS=Homo sapiens OX=9606	CCNT2	0.0637386	3.83301	N/D	N/D	4	2	9	1	730	81	8.92	-6.05237	-4.7446	-5.84422	-4.32077	-5.65916	-5.79714	-4.80156	-4.27906	-5.26223
3.21952	0.0701683	1.04984	O60610	TRUE	Protein diaphanous homolog 1 OS=Homo sapiens OX=9606	DIAPH1	-0.0498392	N/D	N/D	N/D	39	51	1656	49	1272	141.3	5.41	5.07889	5.05752	5.0552	5.15484	5.12591	5.11088	5.0684	5.03747	5.06478
0.670225	-0.444292	0.734945	O60613	FALSE	Selenoprotein F OS=Homo sapiens OX=9606	SELENOF	0.265055	4.55708	5.0837	N/D	13	2	74	2	165	18.1	5.03	-1.22505	-1.32048	-1.31817	-2.71436	-1.28281	-1.18914	-1.20151	-1.3084	-1.33327
1.06869	-0.502413	0.705925	O60636	FALSE	Tetraspanin-2 OS=Homo sapiens OX=9606	TSPAN2	0.294075	4.6197	4.40161	N/D	5	1	5	1	221	24.1	7.77	-5.34674	-6.21256	-5.96646	-5.92854	-6.19164	-6.74866	-5.67779	-5.99486	-5.52479
0.0695127	0.00726875	1.00505	O60645	FALSE	Exocyst complex component 3 OS=Homo sapiens OX=9606	EXOC3	-0.00505102	N/D	N/D	N/D	18	12	255	12	745	85.5	6.29	0.118805	0	0.0419788	0.0340738	0.000153542	0.115959	0.0621519	-0.0240192	0.0578442
0.100234	0.0155368	1.01083	O60664	FALSE	Perilipin-3 OS=Homo sapiens OX=9606	PLIN3	-0.0108275	N/D	N/D	N/D	44	15	482	15	434	47	5.44	1.79398	1.65735	1.70889	1.66604	1.6784	1.63561	1.59211	1.54536	1.56916
0.538303	-0.125733	0.916538	O60669	FALSE	Monocarboxylate transporter 2 OS=Homo sapiens OX=9606	SLC16A7	0.0834617	3.95934	N/D	N/D	4	2	32	2	478	52.2	9.31	-2.30169	-2.53981	-2.65833	-2.72522	-2.82126	-2.67769	-2.65988	-2.72301	-2.81123
0.26381	0.13777	1.1002	O60671	FALSE	Cell cycle checkpoint protein RAD1 OS=Homo sapiens OX=9606	RAD1	-0.100203	N/D	N/D	N/D	12	3	65	3	282	31.8	4.83	-2.65824	-3.58678	-2.80145	-2.97633	-2.87001	-3.04872	-3.44021	-3.04891	-3.08115
0.5469	-0.0832362	0.943938	O60675	FALSE	Transcription factor MafK OS=Homo sapiens OX=9606	MAFK	0.0560621	3.77373	N/D	N/D	20	3	68	3	156	17.5	10.1	-2.10614	-2.35686	-2.23582	-2.35837	-2.42575	-2.17336	-2.17739	-2.28813	-2.2512
1.03118	0.0644199	1.04566	O60678	FALSE	Protein arginine N-methyltransferase 3 OS=Homo sapiens OX=9606	PRMT3	-0.0456644	N/D	N/D	N/D	31	14	357	14	531	59.9	5.35	1.98235	1.98961	1.97094	2.0758	1.98349	1.96782	1.92506	1.90461	1.89512
0.831946	-0.313225	0.804841	O60684	FALSE	Importin subunit alpha-7 OS=Homo sapiens OX=9606	KPNA6	0.195159	4.38468	8.80612	N/D	24	13	432	6	536	60	4.98	0.594955	0.298601	-0.173975	-0.260108	-0.288608	-0.21217	-0.231626	-0.0729008	-0.057478
1.59592	0.156627	1.11468	O60701	TRUE	UDP-glucose 6-dehydrogenase OS=Homo sapiens OX=9606	UGDH	-0.114678	N/D	N/D	N/D	23	10	237	10	494	55	7.12	1.06085	1.01407	0.940386	1.2035	1.17262	1.2766	1.1146	1.04358	1.19219
0.757026	0.064019	1.04537	O60711	FALSE	Leupaxin OS=Homo sapiens OX=9606	LPXN	-0.0453739	N/D	N/D	N/D	40	10	381	10	386	43.3	6.01	1.56398	1.62004	1.54945	1.7158	1.66626	1.71229	1.71059	1.65506	1.70545
0.665759	-0.215481	0.861259	O60725	FALSE	Protein-S-isoprenylcysteine O-methyltransferase OS=Homo sapiens OX=9606	ICMT	0.138741	4.20707	29.4841	N/D	6	1	12	1	284	31.9	7.96	-4.29976	-4.27511	-4.18577	-4.88675	-4.32374	-4.47559	-4.15516	-4.60597	-4.55751
2.70135	0.0824386	1.05881	O60749	FALSE	Sorting nexin-2 OS=Homo sapiens OX=9606	SNX2	-0.0588063	N/D	N/D	N/D	42	22	675	20	519	58.4	5.12	2.45106	2.4395	2.41378	2.51228	2.49222	2.48481	2.37653	2.39974	2.4034
0.183276	-0.0318195	0.978186	O60762	FALSE	Dolichol-phosphate mannosyltransferase subunit 1 OS=Homo sapiens OX=9606	DPM1	0.0218142	3.34832	N/D	N/D	48	11	272	11	260	29.6	9.57	1.6134	1.58144	1.5604	1.4692	1.52755	1.47573	1.55906	1.30145	1.52014
4.06402	0.0930174	1.0666	O60763	TRUE	General vesicular transport factor p115 OS=Homo sapiens OX=9606	USO1	-0.0665987	N/D	N/D	N/D	31	27	765	27	962	107.8	4.91	2.99954	2.98652	2.96989	3.0772	3.08181	3.09265	3.02116	2.97431	2.99378
0.747584	-0.0768491	0.948126	O60783	FALSE	28S ribosomal protein S14, mitochondrial OS=Homo sapiens OX=9606	MRPS14	0.0518739	3.73808	N/D	N/D	23	3	70	3	128	15.1	11.41	-2.21464	-2.1373	-2.11881	-2.22749	-2.22019	-2.11193	-2.06161	-1.99177	-2.134
0.812172	-0.122755	0.918432	O60784	FALSE	Target of Myb protein 1 OS=Homo sapiens OX=9606	TOM1	0.0815678	3.94847	N/D	N/D	14	6	84	6	492	53.8	4.7	-0.638508	-0.763063	-0.802855	-0.984614	-1.00605	-0.760281	-0.777293	-0.913492	-0.87014
0.339584	0.285695	1.219	O60825	TRUE	6-phosphofructo-2-kinase/fructose-2,6-bisphosphatase 2 OS=Homo sapiens OX=9606	PFKFB2	-0.218998	N/D	N/D	N/D	26	12	81	9	505	58.4	8.38	-1.65028	-1.41613	-1.61213	-1.8634	-0.24837	-1.89642	-1.68915	-1.58491	-1.77795
0.543326	0.0619597	1.04388	O60826	FALSE	Coiled-coil domain-containing protein 22 OS=Homo sapiens OX=9606	CCDC22	-0.0438828	N/D	N/D	N/D	26	13	299	13	627	70.7	6.74	0.789446	0.553749	0.717262	0.795003	0.685826	0.714657	0.619452	0.643625	0.695679
0.402434	0.0271583	1.019	O60828	FALSE	Polyglutamine-binding protein 1 OS=Homo sapiens OX=9606	PQBP1	-0.019003	N/D	N/D	N/D	37	7	212	7	265	30.5	6.33	1.51718	1.48482	1.55799	1.57073	1.56733	1.5822	1.62471	1.57464	1.51822
1.20345	-0.124133	0.917555	O60830	FALSE	Mitochondrial import inner membrane translocase subunit Tim17-B OS=Homo sapiens OX=9606	TIMM17B	0.0824449	3.95353	N/D	N/D	22	3	69	3	172	18.3	9.03	-2.14143	-1.91568	-2.07705	-2.16733	-2.08336	-2.21507	-2.06758	-2.03293	-1.95205
1.47097	0.133379	1.09686	O60831	FALSE	PRA1 family protein 2 OS=Homo sapiens OX=9606	PRAF2	-0.0968596	N/D	N/D	N/D	16	3	94	3	178	19.2	9.19	0.759338	0.7679	0.913891	1.03479	1.01061	0.945726	0.880513	0.931314	0.929008
1.77952	0.113725	1.08202	O60832	FALSE	H/ACA ribonucleoprotein complex subunit DKC1 OS=Homo sapiens OX=9606	DKC1	-0.082018	N/D	N/D	N/D	39	17	408	17	514	57.6	9.42	1.76255	1.65447	1.7296	1.9215	1.80209	1.79792	1.704	1.75624	1.75383
0.216467	-0.022215	0.98472	O60841	FALSE	Eukaryotic translation initiation factor 5B OS=Homo sapiens OX=9606	EIF5B	0.0152804	3.19082	N/D	N/D	43	53	1540	53	1220	138.7	5.49	4.03522	4.16482	4.05409	4.04054	4.08744	3.98579	3.98291	4.03803	4.08574
0.255559	0.045334	1.03192	O60861	FALSE	Growth arrest-specific protein 7 OS=Homo sapiens OX=9606	GAS7	-0.0319221	N/D	N/D	N/D	17	7	74	7	476	54.3	7.34	-1.30082	-1.23901	-1.40738	-1.41398	-1.27796	-1.37996	-1.54787	-1.45678	-1.46391
2.98759	0.355606	1.27952	O60869	FALSE	Endothelial differentiation-related factor 1 OS=Homo sapiens OX=9606	EDF1	-0.279523	N/D	N/D	N/D	30	5	323	5	148	16.4	9.95	0.975111	0.939371	1.04335	1.40627	1.41792	1.46718	1.13776	1.12664	1.22687
1.53852	-0.212864	0.862823	O60870	FALSE	DNA/RNA-binding protein KIN17 OS=Homo sapiens OX=9606	KIN	0.137177	4.20136	31.7284	N/D	30	10	190	10	393	45.3	8.95	0.00172043	-0.214108	-0.315741	-0.344943	-0.513984	-0.395317	-0.166297	-0.317606	-0.219273
1.0529	0.0729826	1.05189	O60879	TRUE	Protein diaphanous homolog 2 OS=Homo sapiens OX=9606	DIAPH2	-0.0518891	N/D	N/D	N/D	16	19	267	19	1101	125.5	6.58	2.98198	2.95775	3.05278	3.10853	3.09187	3.0552	2.9585	3.01435	3.10796
0.054825	-0.0183492	0.987362	O60880	FALSE	SH2 domain-containing protein 1A OS=Homo sapiens OX=9606	SH2D1A	0.0126381	3.10721	N/D	N/D	50	4	128	4	128	14.2	8.56	0.910999	0.691544	0.695379	0.625146	0.56626	0.821592	0.595916	0.404408	0.837847
0.515019	0.0181855	1.01268	O60884	FALSE	DnaJ homolog subfamily A member 2 OS=Homo sapiens OX=9606	DNAJA2	-0.012685	N/D	N/D	N/D	38	16	536	16	412	45.7	6.48	2.47638	2.45761	2.4336	2.50283	2.47472	2.48608	2.47795	2.51155	2.46103
0.71509	-0.0809023	0.945466	O60885	TRUE	Bromodomain-containing protein 4 OS=Homo sapiens OX=9606	BRD4	0.0545338	3.76102	N/D	N/D	20	25	306	18	1362	152.1	9.19	0.666945	0.743889	0.641661	0.70168	0.717305	0.582485	0.839658	0.767105	0.829098
0.756223	0.145457	1.10608	O60888	FALSE	Protein CutA OS=Homo sapiens OX=9606	CUTA	-0.106081	N/D	N/D	N/D	31	3	102	3	179	19.1	5.5	0.318808	0.494959	0.192745	0.434722	0.44299	0.571312	0.306916	0.544113	0.167763
0.0617106	0.00693814	1.00482	O60921	FALSE	Checkpoint protein HUS1 OS=Homo sapiens OX=9606	HUS1	-0.00482073	N/D	N/D	N/D	15	4	79	4	280	31.7	6.84	-1.36018	-1.36933	-1.41426	-1.39904	-1.36719	-1.45859	-1.52404	-1.4363	-1.38717
2.38817	0.158069	1.11579	O60925	FALSE	Prefoldin subunit 1 OS=Homo sapiens OX=9606	PFDN1	-0.115793	N/D	N/D	N/D	58	7	322	7	122	14.2	6.81	2.45884	2.51148	2.56443	2.70894	2.73062	2.70292	2.59464	2.572	2.63517
0.254488	0.0484579	1.03416	O60927	FALSE	E3 ubiquitin-protein ligase PPP1R11 OS=Homo sapiens OX=9606	PPP1R11	-0.0341589	N/D	N/D	N/D	42	6	100	6	126	13.9	7.01	-0.827066	-1.02446	-1.01901	-1.07912	-0.962867	-0.932833	-1.10938	-1.07021	-1.19026
0.135538	-0.0170856	0.988227	O60930	FALSE	Ribonuclease H1 OS=Homo sapiens OX=9606	RNASEH1	0.011773	3.07603	N/D	N/D	30	5	115	5	286	32	9.16	-1.37152	-1.22894	-1.37507	-1.33497	-1.41664	-1.40328	-1.45844	-1.38276	-1.39054
0.173615	-0.0139648	0.990367	O60934	TRUE	Nibrin OS=Homo sapiens OX=9606	NBN	0.00963297	2.98796	N/D	N/D	28	17	283	17	754	84.9	6.9	0.900133	0.822769	0.863562	0.867267	0.86436	0.827921	0.833533	0.952723	0.830164
2.42384	-0.436724	0.738811	O60942	TRUE	mRNA-capping enzyme OS=Homo sapiens OX=9606	RNGTT	0.261189	4.54842	5.19524	N/D	17	9	103	9	597	68.5	8.13	-0.994442	-1.1142	-1.14425	-1.71816	-1.27602	-1.65193	-1.23223	-1.13651	-1.05025
0.953485	0.190609	1.14124	O75027	FALSE	Iron-sulfur clusters transporter ABCB7, mitochondrial OS=Homo sapiens OX=9606	ABCB7	-0.141245	N/D	N/D	N/D	13	8	136	8	752	82.6	9.33	-0.731779	-0.248392	-0.286362	-0.246898	-0.188369	-0.174212	-0.343987	-0.388027	-0.364059
0.0580512	-0.0305317	0.979059	O75037	FALSE	Kinesin-like protein KIF21B OS=Homo sapiens OX=9606	KIF21B	0.0209406	3.33018	N/D	N/D	7	10	95	8	1637	182.5	7.08	-1.27193	-0.823038	-0.88792	-1.30491	-0.8581	-1.34585	-1.07163	-1.51604	-1.26397
1.22798	0.195604	1.1452	O75044	TRUE	SLIT-ROBO Rho GTPase-activating protein 2 OS=Homo sapiens OX=9606	SRGAP2	-0.145204	N/D	N/D	N/D	14	13	127	13	1071	120.8	6.7	-0.860197	-1.15556	-1.07324	-0.65445	-0.834723	-0.79546	-0.818717	-0.957918	-0.877256
1.2302	0.239677	1.18073	O75051	TRUE	Plexin-A2 OS=Homo sapiens OX=9606	PLXNA2	-0.180728	N/D	N/D	N/D	2	3	21	1	1894	211	6.48	-1.07985	-1.0972	-1.06528	-0.894403	-1.04819	-1.01341	-1.28028	-1.3501	-1.47736
0.119911	0.0229993	1.01607	O75063	FALSE	Glycosaminoglycan xylosylkinase OS=Homo sapiens OX=9606	FAM20B	-0.0160696	N/D	N/D	N/D	18	6	52	6	409	46.4	6.87	-0.624908	-0.713533	-0.814699	-0.755246	-0.815808	-0.749033	-0.959628	-0.877272	-0.78813
0.425809	-0.106928	0.928563	O75081	TRUE	Protein CBFA2T3 OS=Homo sapiens OX=9606	CBFA2T3	0.0714367	3.88611	N/D	N/D	3	2	28	1	653	71.1	8.18	-4.22991	-4.34192	-4.42478	-4.17218	-4.33132	-4.66257	-4.14185	-4.33469	-4.21742
2.9159	0.0817192	1.05828	O75083	FALSE	WD repeat-containing protein 1 OS=Homo sapiens OX=9606	WDR1	-0.0582784	N/D	N/D	N/D	69	34	2684	34	606	66.2	6.65	6.26743	6.22311	6.20668	6.31375	6.28133	6.31493	6.21341	6.20741	6.21168
1.67287	0.19172	1.14212	O75093	FALSE	Slit homolog 1 protein OS=Homo sapiens OX=9606	SLIT1	-0.142125	N/D	N/D	N/D	8	9	34	9	1534	167.8	6.57	2.76997	2.88337	2.88736	3.08794	3.0076	2.84822	2.75017	2.7263	2.72002
0.447274	0.0944371	1.06765	O75113	FALSE	NEDD4-binding protein 1 OS=Homo sapiens OX=9606	N4BP1	-0.0676488	N/D	N/D	N/D	16	10	148	10	896	100.3	5.36	-0.84223	-0.703682	-0.983587	-0.664235	-0.916533	-0.917896	-1.02468	-1.04886	-0.960913
0.92453	-0.0463653	0.968373	O75116	TRUE	Rho-associated protein kinase 2 OS=Homo sapiens OX=9606	ROCK2	0.031627	3.51402	N/D	N/D	29	37	668	30	1388	160.8	6.02	1.78875	1.81563	1.76617	1.80934	1.7258	1.69603	1.77378	1.82067	1.77554
3.04437	-0.132159	0.912465	O75122	TRUE	CLIP-associating protein 2 OS=Homo sapiens OX=9606	CLASP2	0.0875349	3.98197	N/D	N/D	38	45	1029	40	1294	141	8.4	2.96815	2.90121	2.85743	2.78001	2.77673	2.74388	2.90267	2.89215	2.87258
0.0303924	0.0167454	1.01167	O75127	FALSE	Pentatricopeptide repeat-containing protein 1, mitochondrial OS=Homo sapiens OX=9606	PTCD1	-0.0116747	N/D	N/D	N/D	14	6	10	6	700	78.8	8.59	-2.53227	-2.51221	-2.66435	-2.36826	-2.97827	-2.68626	-2.65108	-3.19674	-2.60941
3.45623	0.103697	1.07452	O75131	FALSE	Copine-3 OS=Homo sapiens OX=9606	CPNE3	-0.0745232	N/D	N/D	N/D	35	17	584	17	537	60.1	5.85	2.4223	2.4806	2.44443	2.55684	2.56041	2.5146	2.42361	2.4388	2.4318
0.248389	-0.13135	0.912977	O75132	TRUE	Zinc finger BED domain-containing protein 4 OS=Homo sapiens OX=9606	ZBED4	0.0870231	3.97917	N/D	N/D	8	9	68	9	1171	130.2	6.83	-1.68031	-1.70269	-1.72479	-2.02589	-2.06836	-2.06902	-1.9092	-1.88377	-2.63769
0.108137	0.0244454	1.01709	O75143	FALSE	Autophagy-related protein 13 OS=Homo sapiens OX=9606	ATG13	-0.0170886	N/D	N/D	N/D	14	5	87	5	517	56.5	5.12	-2.14371	-1.95114	-1.95601	-1.90151	-1.87564	-2.11839	-1.89277	-2.11432	-1.87981
0.676644	-0.641207	0.641176	O75145	TRUE	Liprin-alpha-3 OS=Homo sapiens OX=9606	PPFIA3	0.358824	4.7479	3.46822	N/D	4	5	34	2	1194	133.4	5.68	-4.6071	-3.51132	-4.5187	-4.80983	-4.48162	-5.59709	-5.09127	-3.42773	-4.77372
0.923033	-0.0716004	0.951582	O75146	FALSE	Huntingtin-interacting protein 1-related protein OS=Homo sapiens OX=9606	HIP1R	0.0484182	3.70656	N/D	N/D	36	31	419	31	1068	119.3	6.67	0.813255	0.806931	0.854034	0.826804	0.674634	0.742123	0.735677	0.838074	0.868753
0.156385	-0.0100449	0.993062	O75150	FALSE	E3 ubiquitin-protein ligase BRE1B OS=Homo sapiens OX=9606	RNF40	0.00693841	2.84428	N/D	N/D	41	37	973	36	1001	113.6	6.29	2.71767	2.6536	2.67515	2.64801	2.65489	2.62308	2.60664	2.62121	2.63794
0.492566	-0.0972447	0.934817	O75151	TRUE	Lysine-specific demethylase PHF2 OS=Homo sapiens OX=9606	PHF2	0.0651834	3.84341	N/D	N/D	3	3	134	1	1096	120.7	9.17	-1.19102	-0.90378	-1.03053	-1.218	-1.23942	-1.05674	-1.08901	-1.27068	-0.959833
3.77764	-0.190988	0.876005	O75152	FALSE	Zinc finger CCCH domain-containing protein 11A OS=Homo sapiens OX=9606	ZC3H11A	0.123995	4.1509	92.3052	N/D	50	29	904	29	810	89.1	8.37	2.74991	2.81577	2.79273	2.5379	2.5879	2.57628	2.71675	2.76131	2.71363
1.58169	0.0585017	1.04138	O75153	TRUE	Clustered mitochondria protein homolog OS=Homo sapiens OX=9606	CLUH	-0.0413837	N/D	N/D	N/D	36	39	1165	38	1309	146.6	6.13	3.63767	3.58106	3.59876	3.63729	3.61965	3.67555	3.55209	3.56703	3.57735
0.894874	0.0942877	1.06754	O75155	FALSE	Cullin-associated NEDD8-dissociated protein 2 OS=Homo sapiens OX=9606	CAND2	-0.0675382	N/D	N/D	N/D	6	7	166	5	1236	135.2	5.68	0.054615	0.137896	0.16959	0.133798	0.169398	0.123653	-0.00598049	-0.00986671	-0.0582809
0.455839	0.268935	1.20492	O75157	FALSE	TSC22 domain family protein 2 OS=Homo sapiens OX=9606	TSC22D2	-0.204918	N/D	N/D	N/D	7	5	75	4	780	79.2	5.02	-3.45768	-3.35918	-4.14692	-3.52367	-3.46963	-3.82148	-3.66489	-4.25084	-4.36365
0.287801	0.137969	1.10035	O75164	TRUE	Lysine-specific demethylase 4A OS=Homo sapiens OX=9606	KDM4A	-0.100355	N/D	N/D	N/D	7	5	26	4	1064	120.6	5.85	-2.57673	-2.66509	-3.06099	-2.56444	-2.93701	-2.85858	-3.00755	-3.4364	-2.80111
2.29234	-0.0772293	0.947876	O75165	FALSE	DnaJ homolog subfamily C member 13 OS=Homo sapiens OX=9606	DNAJC13	0.0521237	3.74028	N/D	N/D	22	47	779	47	2243	254.3	6.74	3.35987	3.32605	3.34856	3.28509	3.28638	3.27331	3.41153	3.3304	3.37652
0.000379941	0.00085942	1.0006	O75167	TRUE	Phosphatase and actin regulator 2 OS=Homo sapiens OX=9606	PHACTR2	-0.000595882	N/D	N/D	N/D	4	2	3	2	634	69.7	8.16	-6.33557	-6.17212	-6.73702	-6.87567	-5.77925	-4.53584	-5.03701	-6.12521	-3.97974
0.239378	0.0440094	1.03098	O75170	TRUE	Serine/threonine-protein phosphatase 6 regulatory subunit 2 OS=Homo sapiens OX=9606	PPP6R2	-0.030975	N/D	N/D	N/D	17	13	187	13	966	104.9	4.87	-0.578201	-0.863705	-0.777704	-0.540603	-0.695357	-0.773369	-0.708085	-0.637022	-0.717997
0.306397	-0.0125092	0.991367	O75175	FALSE	CCR4-NOT transcription complex subunit 3 OS=Homo sapiens OX=9606	CNOT3	0.00863323	2.93994	N/D	N/D	21	13	351	13	753	81.8	6.2	1.07565	1.1532	1.11554	1.10533	1.1157	1.07194	1.10215	1.10552	1.10893
0.100519	-0.160123	0.894949	O75177	TRUE	Calcium-responsive transactivator OS=Homo sapiens OX=9606	SS18L1	0.105051	4.0696	N/D	N/D	6	2	7	2	396	43	6.44	-3.86876	-4.68119	-3.7288	-3.7732	-5.99815	-3.67373	-4.64559	-3.98452	-5.02058
1.13802	-0.193492	0.874486	O75179	TRUE	Ankyrin repeat domain-containing protein 17 OS=Homo sapiens OX=9606	ANKRD17	0.125514	4.15694	75.4157	N/D	22	43	1121	28	2603	274.1	6.52	1.68261	1.74848	1.78185	1.34871	1.57353	1.45119	1.45679	1.73082	1.50725
0.0446083	0.0140735	1.0098	O75182	TRUE	Paired amphipathic helix protein Sin3b OS=Homo sapiens OX=9606	SIN3B	-0.00980276	N/D	N/D	N/D	5	5	23	5	1162	133	6.93	-2.81547	-2.82752	-2.98588	-2.942	-2.77035	-3.05553	-2.87127	-3.24239	-2.87769
0.518831	0.0992525	1.07122	O75190	TRUE	DnaJ homolog subfamily B member 6 OS=Homo sapiens OX=9606	DNAJB6	-0.0712183	N/D	N/D	N/D	29	8	200	7	326	36.1	9.16	0.234554	0.247355	-0.13203	0.210748	0.200667	0.294983	0.238059	0.135433	0.0939102
0.198843	-0.0282629	0.9806	O75191	FALSE	Xylulose kinase OS=Homo sapiens OX=9606	XYLB	0.0193997	3.2963	N/D	N/D	27	11	253	11	536	58.3	5.86	0.633905	0.554117	0.728254	0.610076	0.619744	0.622309	0.768552	0.661716	0.52729
1.18528	0.204365	1.15218	O75208	FALSE	Ubiquinone biosynthesis protein COQ9, mitochondrial OS=Homo sapiens OX=9606	COQ9	-0.152179	N/D	N/D	N/D	25	5	65	5	318	35.5	5.94	-0.873117	-1.01893	-1.17645	-0.858933	-0.866273	-0.838427	-0.976422	-1.30799	-1.00054
0.152751	0.0311303	1.02181	O75223	FALSE	Gamma-glutamylcyclotransferase OS=Homo sapiens OX=9606	GGCT	-0.0218124	N/D	N/D	N/D	49	9	310	9	188	21	5.14	1.46996	1.48908	1.42658	1.65694	1.59762	1.56241	1.70759	1.63907	1.71487
0.603942	0.0867677	1.06199	O75251	FALSE	NADH dehydrogenase [ubiquinone] iron-sulfur protein 7, mitochondrial OS=Homo sapiens OX=9606	NDUFS7	-0.0619882	N/D	N/D	N/D	32	6	189	6	213	23.5	9.99	0.426449	0.479387	0.703417	0.520597	0.603854	0.575287	0.405068	0.44025	0.424297
2.89734	0.561319	1.47562	O75264	FALSE	Small integral membrane protein 24 OS=Homo sapiens OX=9606	SMIM24	-0.475617	N/D	N/D	N/D	15	2	25	2	130	15	5.29	-3.40385	-3.59679	-3.40744	-2.66753	-2.86184	-3.13335	-3.32659	-3.40244	-3.55625
1.32031	0.0848511	1.06058	O75306	FALSE	NADH dehydrogenase [ubiquinone] iron-sulfur protein 2, mitochondrial OS=Homo sapiens OX=9606	NDUFS2	-0.0605783	N/D	N/D	N/D	25	11	319	11	463	52.5	7.55	1.77596	1.76918	1.75078	1.86736	1.77636	1.7914	1.64854	1.73305	1.68361
2.37871	0.0518387	1.03659	O75312	TRUE	Zinc finger protein ZPR1 OS=Homo sapiens OX=9606	ZPR1	-0.0365852	N/D	N/D	N/D	49	16	339	16	459	50.9	4.73	1.36742	1.37497	1.36612	1.39957	1.41106	1.40337	1.32699	1.35199	1.32948
0.250926	0.05206	1.03674	O75319	FALSE	RNA/RNP complex-1-interacting phosphatase OS=Homo sapiens OX=9606	DUSP11	-0.0367442	N/D	N/D	N/D	18	5	54	5	377	43.7	9.29	0.860153	0.778521	0.725136	0.570039	0.909823	0.882109	0.716683	0.705137	0.625952
0.253849	-0.0195168	0.986563	O75323	FALSE	Protein NipSnap homolog 2 OS=Homo sapiens OX=9606	NIPSNAP2	0.0134369	3.13417	N/D	N/D	20	5	168	5	286	33.7	9.36	0.607388	0.583412	0.498224	0.520125	0.5367	0.541473	0.607007	0.501635	0.516033
1.29169	0.177104	1.13061	O75330	TRUE	Hyaluronan mediated motility receptor OS=Homo sapiens OX=9606	HMMR	-0.130612	N/D	N/D	N/D	22	15	317	14	724	84	5.83	0.411779	0.548674	0.3179	0.741307	0.669463	0.664433	0.574439	0.599661	0.63533
2.93118	0.155055	1.11346	O75340	FALSE	Programmed cell death protein 6 OS=Homo sapiens OX=9606	PDCD6	-0.113464	N/D	N/D	N/D	31	8	165	8	191	21.9	5.4	0.883522	0.899376	0.897774	1.03209	1.07237	1.12868	0.949737	0.919502	0.986025
3.25436	0.0892514	1.06382	O75347	FALSE	Tubulin-specific chaperone A OS=Homo sapiens OX=9606	TBCA	-0.063818	N/D	N/D	N/D	56	12	1611	12	108	12.8	5.29	5.1451	5.10498	5.10208	5.2001	5.23306	5.22262	5.16029	5.13058	5.13302
2.24429	0.152843	1.11176	O75348	FALSE	V-type proton ATPase subunit G 1 OS=Homo sapiens OX=9606	ATP6V1G1	-0.111758	N/D	N/D	N/D	9	1	47	1	118	13.7	8.79	-0.629118	-0.490215	-0.642542	-0.466763	-0.386764	-0.413673	-0.528487	-0.558296	-0.602802
0.474518	0.0517443	1.03652	O75351	FALSE	Vacuolar protein sorting-associated protein 4B OS=Homo sapiens OX=9606	VPS4B	-0.0365174	N/D	N/D	N/D	38	18	466	15	444	49.3	7.23	1.88334	1.85281	1.84222	1.77432	1.89558	1.91206	1.81757	1.76203	1.69549
1.36546	0.17465	1.12869	O75362	TRUE	Zinc finger protein 217 OS=Homo sapiens OX=9606	ZNF217	-0.128691	N/D	N/D	N/D	19	13	117	13	1048	115.2	8.48	0.200922	-0.108248	0.224974	0.287484	0.267619	0.308245	0.118064	0.117895	0.125189
0.757095	0.0531116	1.0375	O75367	FALSE	Core histone macro-H2A.1 OS=Homo sapiens OX=9606	MACROH2A1	-0.0375002	N/D	N/D	N/D	43	17	732	17	372	39.6	9.79	2.49801	2.5539	2.61662	2.63453	2.62602	2.58579	2.56217	2.5059	2.63742
0.0366537	0.012795	1.00891	O75368	FALSE	SH3 domain-binding glutamic acid-rich-like protein OS=Homo sapiens OX=9606	SH3BGRL	-0.00890824	N/D	N/D	N/D	64	7	392	7	114	12.8	5.25	2.23987	2.27508	2.5085	2.66311	2.16947	2.40131	2.54091	2.4887	2.33794
3.85658	0.0721831	1.05131	O75369	TRUE	Filamin-B OS=Homo sapiens OX=9606	FLNB	-0.0513064	N/D	N/D	N/D	60	127	7382	113	2602	278	5.73	6.75638	6.78102	6.76867	6.82488	6.85167	6.82454	6.74463	6.75354	6.76486
0.262578	0.0246949	1.01726	O75376	TRUE	Nuclear receptor corepressor 1 OS=Homo sapiens OX=9606	NCOR1	-0.0172646	N/D	N/D	N/D	20	36	450	33	2440	270	7.11	3.71577	3.69248	3.84275	3.7917	3.74711	3.76655	3.77558	3.66954	3.76642
0.468933	0.143701	1.10474	O75379	FALSE	Vesicle-associated membrane protein 4 OS=Homo sapiens OX=9606	VAMP4	-0.104736	N/D	N/D	N/D	10	1	21	1	141	16.4	7.34	-4.37941	-4.23578	-4.27491	-4.23824	-4.08474	-4.13848	-4.34111	-4.63018	-3.92376
0.0851403	-0.0177798	0.987752	O75380	FALSE	NADH dehydrogenase [ubiquinone] iron-sulfur protein 6, mitochondrial OS=Homo sapiens OX=9606	NDUFS6	0.0122484	3.09343	N/D	N/D	36	4	85	4	124	13.7	8.28	-0.468294	-0.225481	-0.295227	-0.327868	-0.188561	-0.414114	-0.305013	-0.153152	-0.307241
0.343008	-0.105174	0.929693	O75381	TRUE	Peroxisomal membrane protein PEX14 OS=Homo sapiens OX=9606	PEX14	0.0703071	3.87866	N/D	N/D	37	8	136	8	377	41.2	4.94	-0.710108	-0.794962	-0.91176	-0.98833	-0.989287	-1.24896	-1.03764	-1.22677	-1.14089
0.0992953	-0.0445371	0.969601	O75385	TRUE	Serine/threonine-protein kinase ULK1 OS=Homo sapiens OX=9606	ULK1	0.0303991	3.49627	N/D	N/D	6	5	46	5	1050	112.6	8.79	-3.28224	-3.01099	-3.33066	-2.86348	-3.06043	-3.57715	-3.03451	-2.97273	-3.10378
5.32853	0.131025	1.09507	O75390	FALSE	Citrate synthase, mitochondrial OS=Homo sapiens OX=9606	CS	-0.0950716	N/D	N/D	N/D	47	18	1125	18	466	51.7	8.32	4.37006	4.38013	4.3644	4.50944	4.51673	4.52509	4.39915	4.39972	4.40291
1.35855	0.118938	1.08593	O75391	FALSE	Sperm-associated antigen 7 OS=Homo sapiens OX=9606	SPAG7	-0.0859349	N/D	N/D	N/D	38	8	140	8	227	26	7.91	2.66459	2.75719	2.79119	2.83243	2.75066	2.92352	2.64831	2.67843	2.75988
1.5458	0.352174	1.27648	O75394	FALSE	39S ribosomal protein L33, mitochondrial OS=Homo sapiens OX=9606	MRPL33	-0.276483	N/D	N/D	N/D	38	2	77	2	65	7.6	10.8	-1.62162	-1.37967	-1.15643	-0.81754	-0.929687	-1.25318	-1.2448	-1.3118	-1.39954
1.19427	0.158564	1.11618	O75396	FALSE	Vesicle-trafficking protein SEC22b OS=Homo sapiens OX=9606	SEC22B	-0.116175	N/D	N/D	N/D	61	13	333	13	215	24.7	8.51	3.05383	3.02352	3.00652	3.19009	3.07423	3.09448	2.73749	2.95835	2.98651
1.08898	-0.0487978	0.966742	O75400	FALSE	Pre-mRNA-processing factor 40 homolog A OS=Homo sapiens OX=9606	PRPF40A	0.0332584	3.53659	N/D	N/D	23	22	915	22	957	108.7	7.56	3.26186	3.2227	3.28047	3.16976	3.15675	3.20705	3.2035	3.18883	3.20258
3.58967	-0.240444	0.846485	O75410	TRUE	Transforming acidic coiled-coil-containing protein 1 OS=Homo sapiens OX=9606	TACC1	0.153515	4.25853	17.8443	N/D	30	20	469	18	805	87.7	4.88	0.913816	0.91992	0.905216	0.618817	0.729241	0.584007	0.829074	0.872707	0.86606
1.26294	-0.461378	0.726292	O75419	FALSE	Cell division control protein 45 homolog OS=Homo sapiens OX=9606	CDC45	0.273708	4.57618	4.85394	N/D	17	10	141	10	566	65.5	5.53	-0.178516	-0.0184269	-0.128279	-0.757262	-0.784976	-1.02935	-0.710113	-0.615328	-0.724249
0.33202	0.0748277	1.05324	O75431	FALSE	Metaxin-2 OS=Homo sapiens OX=9606	MTX2	-0.0532352	N/D	N/D	N/D	32	6	174	6	263	29.7	6.29	0.564514	0.594133	0.636986	0.668611	0.746831	0.922596	0.874255	0.882698	0.674522
0.244646	-0.0178914	0.987675	O75436	FALSE	Vacuolar protein sorting-associated protein 26A OS=Homo sapiens OX=9606	VPS26A	0.0123248	3.09617	N/D	N/D	40	13	396	11	327	38.1	6.57	1.52514	1.59046	1.55447	1.5032	1.59735	1.47288	1.55073	1.51512	1.51829
0.476697	0.0836371	1.05969	O75438	FALSE	NADH dehydrogenase [ubiquinone] 1 beta subcomplex subunit 1 OS=Homo sapiens OX=9606	NDUFB1	-0.0596862	N/D	N/D	N/D	36	3	41	3	58	7	8.92	-0.127216	-0.141453	-0.167576	-0.0528154	0.0310106	-0.271414	-0.329883	-0.246172	-0.0759602
1.40423	0.0629163	1.04458	O75439	FALSE	Mitochondrial-processing peptidase subunit beta OS=Homo sapiens OX=9606	PMPCB	-0.0445751	N/D	N/D	N/D	37	18	861	17	489	54.3	6.83	2.58164	2.5863	2.52761	2.62378	2.56809	2.63106	2.51624	2.50026	2.55634
0.366911	-0.0539578	0.96329	O75446	FALSE	Histone deacetylase complex subunit SAP30 OS=Homo sapiens OX=9606	SAP30	0.0367099	3.58103	N/D	N/D	14	3	60	3	220	23.3	9.17	-0.799774	-0.970915	-1.05219	-0.986449	-0.958261	-1.07283	-0.959765	-1.05643	-0.872267
0.335535	0.0315779	1.02213	O75448	FALSE	Mediator of RNA polymerase II transcription subunit 24 OS=Homo sapiens OX=9606	MED24	-0.0221294	N/D	N/D	N/D	8	8	198	8	989	110.2	6.95	-0.0342598	0.00605583	0.152121	0.0930185	0.104663	0.0638943	0.0999269	0.0417843	0.0680561
9.05625	-1.73816	0.299752	O75449	FALSE	Katanin p60 ATPase-containing subunit A1 OS=Homo sapiens OX=9606	KATNA1	0.700248	5.36849	1.94178	5.36849	24	12	265	12	491	55.9	6.9	0.200748	0.180624	0.151163	-1.63265	-1.63755	-1.56194	0.0799341	0.0412788	0.110922
0.581446	0.787909	1.72657	O75467	TRUE	Zinc finger protein 324A OS=Homo sapiens OX=9606	ZNF324	-0.726571	N/D	N/D	N/D	4	2	4	2	553	61.1	9.57	-3.57432	-6.11925	-3.99657	-3.89919	-3.67505	-3.90639	-4.26554	-5.8238	-3.90923
6.47057	-1.20249	0.434525	O75475	FALSE	PC4 and SFRS1-interacting protein OS=Homo sapiens OX=9606	PSIP1	0.565475	5.1144	2.27801	5.1144	37	17	559	16	530	60.1	9.13	1.90556	2.09524	2.1273	0.976892	0.866977	0.827072	2.09754	2.15067	2.1805
0.405296	0.0668648	1.04744	O75477	FALSE	Erlin-1 OS=Homo sapiens OX=9606	ERLIN1	-0.047438	N/D	N/D	N/D	24	10	161	7	348	39.1	7.87	-0.534081	-0.532133	-0.709578	-0.514792	-0.694049	-0.564276	-0.807162	-0.657423	-0.707047
0.747477	0.0646237	1.04581	O75489	FALSE	NADH dehydrogenase [ubiquinone] iron-sulfur protein 3, mitochondrial OS=Homo sapiens OX=9606	NDUFS3	-0.0458121	N/D	N/D	N/D	28	9	325	9	264	30.2	7.5	1.68883	1.59152	1.53721	1.71775	1.73563	1.68381	1.72054	1.69708	1.65145
0.258172	-0.0211562	0.985443	O75494	FALSE	Serine/arginine-rich splicing factor 10 OS=Homo sapiens OX=9606	SRSF10	0.0145573	3.16945	N/D	N/D	26	10	415	10	262	31.3	11.27	3.94438	3.94765	3.96951	3.94505	3.88411	3.87611	3.90795	3.82609	3.94191
3.93682	-0.31848	0.801914	O75496	FALSE	Geminin OS=Homo sapiens OX=9606	GMNN	0.198086	4.39273	8.52124	N/D	30	5	152	5	209	23.6	4.96	-0.267834	-0.235121	-0.25008	-0.52307	-0.655839	-0.505196	-0.301103	-0.239223	-0.163967
0.0953973	-0.0324368	0.977767	O75503	FALSE	Ceroid-lipofuscinosis neuronal protein 5 OS=Homo sapiens OX=9606	CLN5	0.0222326	3.35676	N/D	N/D	18	6	110	6	358	41.5	7.4	-1.53983	-1.61252	-1.55097	-1.51609	-1.33886	-1.43451	-1.11863	-1.21678	-1.34557
0.262148	-0.0338318	0.976822	O75506	FALSE	Heat shock factor-binding protein 1 OS=Homo sapiens OX=9606	HSBP1	0.0231776	3.37525	N/D	N/D	64	3	65	3	76	8.5	4.36	0.298332	0.226833	0.172728	0.169654	0.0717211	0.229013	0.205205	0.165297	0.0753727
1.02576	0.116366	1.084	O75521	FALSE	Enoyl-CoA delta isomerase 2 OS=Homo sapiens OX=9606	ECI2	-0.0840011	N/D	N/D	N/D	23	7	361	7	394	43.6	9	1.08637	1.0169	1.10532	1.21289	1.05362	1.29386	1.16596	0.985373	1.06262
2.37946	-0.570508	0.67338	O75525	TRUE	KH domain-containing, RNA-binding, signal transduction-associated protein 3 OS=Homo sapiens OX=9606	KHDRBS3	0.32662	4.68578	3.86077	N/D	19	7	319	6	346	38.8	7.61	0.581259	0.621294	0.196533	-0.183999	0.235532	-0.0745316	0.650426	0.686005	0.641535
0.356374	-0.0678309	0.954071	O75528	FALSE	Transcriptional adapter 3 OS=Homo sapiens OX=9606	TADA3	0.0459286	3.6825	N/D	N/D	7	3	21	3	432	48.9	6.27	-4.6163	-4.3522	-4.34409	-4.65732	-4.5653	-4.41053	-4.58388	-4.45916	-4.50369
0.499084	-0.149045	0.901847	O75529	FALSE	TAF5-like RNA polymerase II p300/CBP-associated factor-associated factor 65 kDa subunit 5L OS=Homo sapiens OX=9606	TAF5L	0.0981526	4.03677	N/D	N/D	9	5	41	5	589	66.1	5.88	-1.5022	-1.47851	-1.4769	-1.51783	-1.72484	-1.6111	-1.22647	-1.27484	-1.85435
3.32754	-0.223504	0.856483	O75530	TRUE	Polycomb protein EED OS=Homo sapiens OX=9606	EED	0.143517	4.22418	24.2866	N/D	51	17	512	17	441	50.2	7.03	1.09183	1.08763	1.04848	0.909921	0.794011	0.781645	1.05597	1.05129	0.976973
3.01115	0.545736	1.45977	O75531	FALSE	Barrier-to-autointegration factor OS=Homo sapiens OX=9606	BANF1	-0.459765	N/D	N/D	N/D	37	2	157	2	89	10.1	6.09	-0.586187	-0.46907	-0.511391	0.183379	0.181729	0.141552	-0.175944	-0.288782	-0.229721
2.60052	-0.0428548	0.970732	O75533	FALSE	Splicing factor 3B subunit 1 OS=Homo sapiens OX=9606	SF3B1	0.0292678	3.47929	N/D	N/D	58	67	2761	67	1304	145.7	7.09	6.02094	5.99274	5.98281	5.94164	5.96755	5.95859	6.00641	5.99592	5.99385
2.59534	0.0578122	1.04089	O75534	TRUE	Cold shock domain-containing protein E1 OS=Homo sapiens OX=9606	CSDE1	-0.0408861	N/D	N/D	N/D	53	42	1978	42	798	88.8	6.25	4.72045	4.72429	4.75504	4.80837	4.79431	4.7744	4.72134	4.72572	4.76044
0.400038	0.0346411	1.0243	O75554	FALSE	WW domain-binding protein 4 OS=Homo sapiens OX=9606	WBP4	-0.024302	N/D	N/D	N/D	26	7	195	7	376	42.5	5.57	-0.0850563	-0.0944729	-0.0178356	-0.0484896	-0.0372362	-0.0844421	-0.163001	-0.160725	-0.027092
0.508558	0.0371563	1.02609	O75569	FALSE	Interferon-inducible double-stranded RNA-dependent protein kinase activator A OS=Homo sapiens OX=9606	PRKRA	-0.0260893	N/D	N/D	N/D	45	13	481	13	313	34.4	8.41	1.65338	1.5861	1.6046	1.63086	1.59579	1.67023	1.56427	1.51617	1.6463
0.56399	0.609432	1.52566	O75575	FALSE	DNA-directed RNA polymerase III subunit RPC9 OS=Homo sapiens OX=9606	CRCP	-0.525658	N/D	N/D	N/D	17	2	35	2	148	16.9	5.39	-4.61437	-3.11833	-3.31353	-3.78359	-2.65694	-2.82088	-2.67745	-4.27974	-4.17599
5.13442	-0.830234	0.562438	O75582	TRUE	Ribosomal protein S6 kinase alpha-5 OS=Homo sapiens OX=9606	RPS6KA5	0.437562	4.89096	2.83791	4.89096	3	3	34	3	802	89.8	7.11	-2.77669	-2.80197	-2.70645	-3.74772	-3.63431	-3.46434	-2.92717	-2.74932	-2.74973
0.630382	0.172268	1.12683	O75586	FALSE	Mediator of RNA polymerase II transcription subunit 6 OS=Homo sapiens OX=9606	MED6	-0.126829	N/D	N/D	N/D	18	4	22	4	246	28.4	8.62	-4.21341	-4.04764	-3.99828	-3.7792	-3.71548	-3.72485	-3.60817	-3.73229	-3.87289
0.91448	-0.057041	0.961234	O75592	TRUE	E3 ubiquitin-protein ligase MYCBP2 OS=Homo sapiens OX=9606	MYCBP2	0.0387664	3.60563	N/D	N/D	7	28	203	28	4678	513.3	7.02	3.4376	3.33925	3.34536	3.35531	3.32341	3.30192	3.45956	3.35337	3.36841
0.453588	0.181934	1.1344	O75600	FALSE	2-amino-3-ketobutyrate coenzyme A ligase, mitochondrial OS=Homo sapiens OX=9606	GCAT	-0.134403	N/D	N/D	N/D	15	5	106	5	419	45.3	8.05	-1.59602	-1.75367	-1.94624	-1.43328	-2.0432	-1.22594	-1.60758	-1.89193	-1.70102
2.14457	-0.246163	0.843136	O75607	TRUE	Nucleoplasmin-3 OS=Homo sapiens OX=9606	NPM3	0.156864	4.26963	16.4141	N/D	38	4	208	4	178	19.3	4.63	1.48005	1.37935	1.47516	1.18091	1.01878	1.19012	1.23935	1.33943	1.34325
0.462174	0.102038	1.07329	O75608	FALSE	Acyl-protein thioesterase 1 OS=Homo sapiens OX=9606	LYPLA1	-0.0732883	N/D	N/D	N/D	44	6	190	6	230	24.7	6.77	0.735085	0.86834	0.641796	0.99952	0.805453	0.993019	1.0221	0.728806	0.987633
0.206741	-0.0161742	0.988852	O75616	FALSE	GTPase Era, mitochondrial OS=Homo sapiens OX=9606	ERAL1	0.0111485	3.05208	N/D	N/D	22	8	231	8	437	48.3	8.84	0.0986691	0.181871	0.16058	0.1906	0.149354	0.153368	0.181129	0.24716	0.214281
1.26784	0.187844	1.13906	O75629	TRUE	Protein CREG1 OS=Homo sapiens OX=9606	CREG1	-0.13906	N/D	N/D	N/D	21	3	62	3	220	24.1	7.59	-2.15352	-2.22775	-2.52362	-2.15906	-2.03918	-2.1165	-2.3561	-2.24909	-2.24646
0.0531891	-0.00385491	0.997332	O75643	FALSE	U5 small nuclear ribonucleoprotein 200 kDa helicase OS=Homo sapiens OX=9606	SNRNP200	0.00266845	2.42742	N/D	N/D	45	94	3855	92	2136	244.4	6.06	5.60968	5.65897	5.6037	5.59287	5.57299	5.59871	5.55961	5.53981	5.58047
0.582126	-0.355193	0.781765	O75648	FALSE	Mitochondrial tRNA-specific 2-thiouridylase 1 OS=Homo sapiens OX=9606	TRMU	0.218235	4.44585	7.008	N/D	7	3	51	3	421	47.7	8.03	-3.92642	-2.9116	-2.77661	-3.15922	-3.53074	-3.29506	-2.70887	-2.77962	-2.73577
3.3796	0.153251	1.11207	O75663	FALSE	TIP41-like protein OS=Homo sapiens OX=9606	TIPRL	-0.112072	N/D	N/D	N/D	46	9	386	9	272	31.4	5.91	1.81409	1.80855	1.8545	1.97913	1.97085	1.98804	1.75864	1.85472	1.86604
0.39207	0.029024	1.02032	O75683	FALSE	Surfeit locus protein 6 OS=Homo sapiens OX=9606	SURF6	-0.0203216	N/D	N/D	N/D	27	10	368	10	361	41.4	10.64	0.893213	1.00541	1.01598	1.02227	1.01881	0.997601	0.984393	1.04856	0.955648
1.16864	0.0605076	1.04283	O75691	TRUE	Small subunit processome component 20 homolog OS=Homo sapiens OX=9606	UTP20	-0.0428326	N/D	N/D	N/D	14	37	731	37	2785	318.2	7.39	2.20828	2.25834	2.22987	2.28255	2.27545	2.22192	2.18177	2.13931	2.17923
0.425565	0.0312823	1.02192	O75694	TRUE	Nuclear pore complex protein Nup155 OS=Homo sapiens OX=9606	NUP155	-0.02192	N/D	N/D	N/D	29	31	909	31	1391	155.1	6.16	3.22672	3.16596	3.16035	3.15543	3.29067	3.24267	3.19894	3.24845	3.18942
0.207276	-0.0220269	0.984848	O75695	FALSE	Protein XRP2 OS=Homo sapiens OX=9606	RP2	0.0151519	3.1871	N/D	N/D	16	7	174	7	350	39.6	5.12	0.169304	0.144461	0.262821	0.105651	0.213351	0.110546	0.115916	0.199471	0.0992851
1.31827	0.0787091	1.05607	O75717	FALSE	WD repeat and HMG-box DNA-binding protein 1 OS=Homo sapiens OX=9606	WDHD1	-0.0560727	N/D	N/D	N/D	43	36	1047	36	1129	125.9	5.62	2.57193	2.55033	2.65022	2.70863	2.61064	2.7211	2.63349	2.62309	2.57942
0.107723	0.0248682	1.01739	O75718	FALSE	Cartilage-associated protein OS=Homo sapiens OX=9606	CRTAP	-0.0173867	N/D	N/D	N/D	19	8	150	8	401	46.5	5.73	-0.603405	-0.342096	-0.3267	-0.493802	-0.406333	-0.352085	-0.384269	-0.368656	-0.628523
1.79478	-0.0735701	0.950284	O75746	FALSE	Calcium-binding mitochondrial carrier protein Aralar1 OS=Homo sapiens OX=9606	SLC25A12	0.0497165	3.71865	N/D	N/D	22	16	360	12	678	74.7	8.38	0.97496	0.958067	1.0138	0.86016	0.870008	0.927305	0.9453	0.925299	0.938942
0.612936	0.0983233	1.07053	O75787	FALSE	Renin receptor OS=Homo sapiens OX=9606	ATP6AP2	-0.0705286	N/D	N/D	N/D	13	6	119	6	350	39	6.1	-0.568502	-0.597391	-0.776096	-0.628644	-0.614871	-0.535591	-0.82351	-0.813732	-0.56892
0.68202	0.37612	1.29785	O75791	FALSE	GRB2-related adapter protein 2 OS=Homo sapiens OX=9606	GRAP2	-0.297847	N/D	N/D	N/D	59	16	603	16	330	37.9	6.95	2.33873	2.44625	2.42176	2.35211	3.58177	2.34553	2.33495	2.3252	2.43522
0.337839	0.0186896	1.01304	O75792	FALSE	Ribonuclease H2 subunit A OS=Homo sapiens OX=9606	RNASEH2A	-0.0130389	N/D	N/D	N/D	50	16	509	16	299	33.4	5.25	3.34168	3.36657	3.32929	3.4128	3.39319	3.37391	3.40966	3.37304	3.42742
1.02836	0.0503062	1.03548	O75794	FALSE	Cell division cycle protein 123 homolog OS=Homo sapiens OX=9606	CDC123	-0.0354846	N/D	N/D	N/D	39	13	385	13	336	39.1	4.81	1.29798	1.21696	1.25418	1.347	1.27009	1.27885	1.22231	1.22002	1.2786
2.08541	-0.29528	0.814914	O75817	FALSE	Ribonuclease P protein subunit p20 OS=Homo sapiens OX=9606	POP7	0.185086	4.35626	9.97453	N/D	39	5	168	5	140	15.6	8.94	-1.08932	-1.29998	-1.08597	-1.43117	-1.37965	-1.61879	-1.26109	-1.28059	-1.07059
0.480732	-0.0759797	0.948698	O75818	FALSE	Ribonuclease P protein subunit p40 OS=Homo sapiens OX=9606	RPP40	0.0513023	3.73301	N/D	N/D	26	8	137	8	363	41.8	6.67	0.0976524	0.0430031	-0.157442	-0.0013113	-0.0830317	0.00933266	0.14754	0.0128517	0.162252
3.73867	0.0634866	1.04499	O75821	TRUE	Eukaryotic translation initiation factor 3 subunit G OS=Homo sapiens OX=9606	EIF3G	-0.0449881	N/D	N/D	N/D	41	11	609	11	320	35.6	6.13	4.85627	4.86644	4.85546	4.93375	4.92855	4.94178	4.88934	4.8756	4.88414
1.66996	0.063073	1.04469	O75822	FALSE	Eukaryotic translation initiation factor 3 subunit J OS=Homo sapiens OX=9606	EIF3J	-0.0446886	N/D	N/D	N/D	57	21	869	21	258	29	4.83	3.3121	3.27513	3.27548	3.41498	3.35328	3.33448	3.32937	3.30938	3.32558
0.761421	0.0789644	1.05626	O75832	FALSE	26S proteasome non-ATPase regulatory subunit 10 OS=Homo sapiens OX=9606	PSMD10	-0.0562596	N/D	N/D	N/D	69	13	547	13	226	24.4	6.1	4.64273	4.70952	4.61147	4.69281	4.62484	4.69198	4.58827	4.49841	4.49509
4.8651	1.70502	3.26033	O75843	FALSE	AP-1 complex subunit gamma-like 2 OS=Homo sapiens OX=9606	AP1G2	-2.26033	N/D	N/D	N/D	8	6	73	5	785	87.1	6.55	-2.46064	-2.51349	-2.365	-0.480664	-0.765992	-0.38043	-1.9578	-2.17725	-2.01009
0.489957	0.0484869	1.03418	O75844	FALSE	CAAX prenyl protease 1 homolog OS=Homo sapiens OX=9606	ZMPSTE24	-0.0341797	N/D	N/D	N/D	24	11	351	11	475	54.8	7.49	0.590919	0.60083	0.654982	0.601819	0.639859	0.575228	0.481938	0.463491	0.55073
0.210171	-0.135047	0.91064	O75865	FALSE	Trafficking protein particle complex subunit 6A OS=Homo sapiens OX=9606	TRAPPC6A	0.0893597	3.99179	N/D	N/D	9	2	30	2	159	17.6	5.26	-2.85455	-2.0834	-1.88187	-2.33134	-1.98746	-2.80594	-2.3352	-2.01394	-2.27025
3.81916	0.287771	1.22075	O75874	FALSE	Isocitrate dehydrogenase [NADP] cytoplasmic OS=Homo sapiens OX=9606	IDH1	-0.220753	N/D	N/D	N/D	29	12	483	11	414	46.6	7.01	1.61221	1.52102	1.56424	1.91364	1.88711	1.86702	1.65317	1.56588	1.69238
0.242713	0.0311325	1.02181	O75879	FALSE	Glutamyl-tRNA(Gln) amidotransferase subunit B, mitochondrial OS=Homo sapiens OX=9606	GATB	-0.021814	N/D	N/D	N/D	20	11	198	11	557	61.8	8.63	1.44839	1.33596	1.38333	1.45593	1.27911	1.43173	1.34162	1.25724	1.38021
2.15891	0.220179	1.16488	O75880	FALSE	Protein SCO1 homolog, mitochondrial OS=Homo sapiens OX=9606	SCO1	-0.164878	N/D	N/D	N/D	23	6	152	6	301	33.8	8.88	1.65422	1.54158	1.61077	1.98615	1.80827	1.76383	1.60843	1.64847	1.73197
1.0754	0.0847894	1.06053	O75882	FALSE	Attractin OS=Homo sapiens OX=9606	ATRN	-0.0605329	N/D	N/D	N/D	3	3	12	3	1429	158.4	7.31	0.223652	0.19379	0.178257	0.336555	0.331637	0.317314	0.372579	0.267553	0.226444
1.48722	0.130853	1.09494	O75884	FALSE	Serine hydrolase RBBP9 OS=Homo sapiens OX=9606	RBBP9	-0.0949413	N/D	N/D	N/D	34	4	136	4	186	21	6.2	-0.509411	-0.682001	-0.470133	-0.466935	-0.471681	-0.385817	-0.624953	-0.567793	-0.579695
0.487474	-0.0549499	0.962628	O75886	FALSE	Signal transducing adapter molecule 2 OS=Homo sapiens OX=9606	STAM2	0.0373721	3.58909	N/D	N/D	10	5	88	3	525	58.1	5.07	0.928167	0.744154	0.703175	0.737157	0.806437	0.717072	0.784421	0.861937	0.829178
0.00690025	0.00144339	1.001	O75896	FALSE	Tumor suppressor candidate 2 OS=Homo sapiens OX=9606	TUSC2	-0.00100098	N/D	N/D	N/D	16	2	34	2	110	12.1	9.69	-2.05484	-2.23617	-2.26238	-2.19473	-2.05322	-2.30615	-2.15538	-2.13226	-2.27581
0.42779	0.371478	1.29368	O75907	FALSE	Diacylglycerol O-acyltransferase 1 OS=Homo sapiens OX=9606	DGAT1	-0.293678	N/D	N/D	N/D	3	1	12	1	488	55.2	9.32	-4.33812	-4.41158	-5.42004	-4.72362	-3.34689	-4.76578	-4.40933	-4.78138	-4.541
0.629245	0.0725786	1.05159	O75909	TRUE	Cyclin-K OS=Homo sapiens OX=9606	CCNK	-0.0515946	N/D	N/D	N/D	22	10	254	10	580	64.2	8.41	-0.0558033	-0.169682	-0.138247	0.0551043	-0.0642767	-0.119913	-0.0187521	-0.219093	-0.0920658
0.164803	0.0456335	1.03214	O75915	FALSE	PRA1 family protein 3 OS=Homo sapiens OX=9606	ARL6IP5	-0.0321363	N/D	N/D	N/D	24	4	157	4	188	21.6	9.77	0.868845	0.591455	0.584818	0.533412	0.834773	0.57115	0.537827	0.421856	0.600067
0.206308	-0.0380632	0.973962	O75925	TRUE	E3 SUMO-protein ligase PIAS1 OS=Homo sapiens OX=9606	PIAS1	0.0260384	3.42707	N/D	N/D	14	7	125	7	651	71.8	7.3	-0.921347	-0.995575	-1.06173	-1.0335	-1.2014	-1.10971	-1.0792	-1.20248	-1.2005
0.550058	0.122481	1.08861	O75928	TRUE	E3 SUMO-protein ligase PIAS2 OS=Homo sapiens OX=9606	PIAS2	-0.0886055	N/D	N/D	N/D	8	4	47	4	621	68.2	7.52	-2.60361	-2.58394	-2.73357	-2.63952	-2.43966	-2.59916	-2.60712	-2.5716	-2.99172
0.580223	-0.0316319	0.978313	O75934	FALSE	Pre-mRNA-splicing factor SPF27 OS=Homo sapiens OX=9606	BCAS2	0.021687	3.34572	N/D	N/D	53	11	320	11	225	26.1	5.66	1.53464	1.4191	1.45344	1.44963	1.4469	1.43435	1.44465	1.497	1.50272
0.219167	0.0218279	1.01524	O75935	FALSE	Dynactin subunit 3 OS=Homo sapiens OX=9606	DCTN3	-0.015245	N/D	N/D	N/D	31	5	160	5	186	21.1	5.47	1.04962	1.03864	1.0454	1.05659	1.05019	1.14486	1.05979	1.00426	1.17459
1.35959	-0.099532	0.933336	O75937	FALSE	DnaJ homolog subfamily C member 8 OS=Homo sapiens OX=9606	DNAJC8	0.0666643	3.85386	N/D	N/D	47	14	703	14	253	29.8	9.06	3.11489	3.17663	3.26372	3.08581	3.14986	3.05264	3.24639	3.22981	3.14236
1.01936	0.168901	1.1242	O75940	FALSE	Survival of motor neuron-related-splicing factor 30 OS=Homo sapiens OX=9606	SMNDC1	-0.124202	N/D	N/D	N/D	21	5	191	5	238	26.7	7.24	1.19337	1.30744	1.19413	1.58612	1.50182	1.48822	1.47831	1.48642	1.47925
0.08091	0.0702014	1.04986	O75943	FALSE	Cell cycle checkpoint protein RAD17 OS=Homo sapiens OX=9606	RAD17	-0.0498632	N/D	N/D	N/D	8	5	32	5	681	77	7.06	-2.85143	-3.90583	-2.73864	-2.90853	-2.77486	-3.37575	-3.35118	-2.56575	-3.12666
0.279103	0.0189757	1.01324	O75947	TRUE	ATP synthase subunit d, mitochondrial OS=Homo sapiens OX=9606	ATP5PD	-0.0132399	N/D	N/D	N/D	37	10	697	10	161	18.5	5.3	3.49985	3.45867	3.45788	3.53631	3.48409	3.55577	3.52681	3.55382	3.54146
0.805051	0.361337	1.28462	O75955	FALSE	Flotillin-1 OS=Homo sapiens OX=9606	FLOT1	-0.284616	N/D	N/D	N/D	10	4	10	4	427	47.3	7.49	-3.66039	-3.08573	-2.9874	-2.96556	-3.01187	-3.00153	-3.74754	-2.95639	-3.68849
0.356627	0.0145895	1.01016	O75964	FALSE	ATP synthase subunit g, mitochondrial OS=Homo sapiens OX=9606	ATP5MG	-0.010164	N/D	N/D	N/D	41	5	394	5	103	11.4	9.64	2.73958	2.7681	2.7396	2.77076	2.71837	2.80494	2.75822	2.74448	2.7506
0.891741	0.0864011	1.06172	O75976	TRUE	Carboxypeptidase D OS=Homo sapiens OX=9606	CPD	-0.0617184	N/D	N/D	N/D	13	15	237	15	1380	152.8	6.05	-0.439613	-0.430115	-0.366949	-0.320704	-0.286328	-0.353689	-0.265784	-0.436089	-0.501301
0.143275	-0.0142001	0.990206	O75995	TRUE	SAM and SH3 domain-containing protein 3 OS=Homo sapiens OX=9606	SASH3	0.00979444	2.99525	N/D	N/D	43	8	232	8	380	41.6	5.27	1.24957	1.27227	1.29208	1.24349	1.30205	1.13865	1.20907	1.20099	1.2296
0.32871	0.0196665	1.01373	O76003	FALSE	Glutaredoxin-3 OS=Homo sapiens OX=9606	GLRX3	-0.0137251	N/D	N/D	N/D	39	13	555	13	335	37.4	5.39	3.63523	3.58538	3.53707	3.65927	3.61621	3.58847	3.63331	3.60676	3.61212
0.616417	0.0249995	1.01748	O76021	TRUE	Ribosomal L1 domain-containing protein 1 OS=Homo sapiens OX=9606	RSL1D1	-0.0174793	N/D	N/D	N/D	32	18	905	18	490	54.9	10.13	3.3632	3.36906	3.3637	3.41662	3.4012	3.4337	3.43441	3.41916	3.40351
0.145701	-0.179733	0.882866	O76024	FALSE	Wolframin OS=Homo sapiens OX=9606	WFS1	0.117134	4.12279	N/D	N/D	3	2	21	2	890	100.2	8.05	-4.81604	-5.43439	-3.81998	-5.83921	-4.41122	-5.36617	-5.42981	-5.49834	-5.15624
0.465729	-0.0506698	0.965488	O76031	TRUE	ATP-dependent Clp protease ATP-binding subunit clpX-like, mitochondrial OS=Homo sapiens OX=9606	CLPX	0.034512	3.55322	N/D	N/D	44	26	834	26	633	69.2	7.58	3.25128	3.19495	3.07176	3.17555	3.14523	3.06833	3.22293	3.23952	3.10182
0.39536	-0.100637	0.932621	O76071	FALSE	Probable cytosolic iron-sulfur protein assembly protein CIAO1 OS=Homo sapiens OX=9606	CIAO1	0.0673787	3.85882	N/D	N/D	43	9	322	9	339	37.8	4.97	2.71932	2.81872	2.79021	2.78199	2.83178	2.90483	3.07636	3.08008	3.15634
0.074869	0.0583348	1.04126	O76075	FALSE	DNA fragmentation factor subunit beta OS=Homo sapiens OX=9606	DFFB	-0.0412632	N/D	N/D	N/D	6	2	10	2	338	39.1	9	-4.39125	-4.41057	-4.89583	-4.19856	-4.98266	-4.00227	-4.09674	-4.80864	-4.11396
1.65668	-0.290463	0.81764	O76080	FALSE	AN1-type zinc finger protein 5 OS=Homo sapiens OX=9606	ZFAND5	0.18236	4.34837	10.3528	N/D	38	6	125	5	213	23.1	8.51	-1.67517	-1.64583	-1.95058	-2.00491	-1.94306	-1.87887	-1.57448	-1.58425	-1.4806
1.03612	0.050281	1.03547	O76094	FALSE	Signal recognition particle subunit SRP72 OS=Homo sapiens OX=9606	SRP72	-0.0354666	N/D	N/D	N/D	46	28	1026	28	671	74.6	9.26	3.36248	3.31838	3.34098	3.40521	3.39136	3.32037	3.26606	3.32471	3.3196
0.0245279	0.00554419	1.00385	O76095	FALSE	Protein JTB OS=Homo sapiens OX=9606	JTB	-0.00385033	N/D	N/D	N/D	18	2	49	2	146	16.3	8.28	-3.01937	-3.25655	-3.13856	-3.21067	-3.16079	-3.19636	-3.39317	-3.12761	-3.23363
0.132084	0.0420299	1.02956	O76096	TRUE	Cystatin-F OS=Homo sapiens OX=9606	CST7	-0.0295614	N/D	N/D	N/D	8	1	2	1	145	16.4	8.48	-4.70787	-4.83566	-5.09279	-4.76515	-4.77534	-5.14396	-4.90996	-5.07355	-5.00126
0.0797311	-0.04926	0.966432	O94761	TRUE	ATP-dependent DNA helicase Q4 OS=Homo sapiens OX=9606	RECQL4	0.0335681	3.54076	N/D	N/D	2	3	16	3	1208	133	8.09	-3.41926	-3.577	-4.45694	-3.76247	-3.80643	-3.73956	-3.66669	-3.68857	-3.5129
0.0471046	0.0163426	1.01139	O94762	TRUE	ATP-dependent DNA helicase Q5 OS=Homo sapiens OX=9606	RECQL5	-0.0113923	N/D	N/D	N/D	2	2	13	2	991	108.8	8.56	-3.86671	-3.97355	-3.97563	-3.83945	-4.04615	-4.23981	-4.28875	-4.21226	-4.03198
1.01151	-0.396274	0.759818	O94763	TRUE	Unconventional prefoldin RPB5 interactor 1 OS=Homo sapiens OX=9606	URI1	0.240182	4.49983	5.92376	N/D	18	6	88	6	535	59.8	5.05	-1.52463	-1.52649	-2.14026	-2.11112	-2.2787	-2.25676	-1.4739	-2.16025	-2.08999
1.11733	0.179476	1.13247	O94766	TRUE	Galactosylgalactosylxylosylprotein 3-beta-glucuronosyltransferase 3 OS=Homo sapiens OX=9606	B3GAT3	-0.132472	N/D	N/D	N/D	21	6	150	6	335	37.1	8.27	-1.42243	-1.48272	-1.39623	-1.52142	-1.27123	-1.10457	-1.50836	-1.53831	-1.52326
0.196	-0.238747	0.847481	O94768	FALSE	Serine/threonine-protein kinase 17B OS=Homo sapiens OX=9606	STK17B	0.152519	4.25519	18.3222	N/D	8	4	43	4	372	42.3	5.25	-1.99087	-2.18768	-3.12314	-1.86892	-3.28983	-3.38477	-2.0018	-3.15528	-3.19576
1.05892	0.036359	1.02552	O94776	TRUE	Metastasis-associated protein MTA2 OS=Homo sapiens OX=9606	MTA2	-0.0255224	N/D	N/D	N/D	48	26	1126	21	668	75	9.66	3.10708	3.11448	3.10229	3.15318	3.15808	3.08723	3.09449	3.09694	3.06355
0.295469	-0.0197002	0.986438	O94782	FALSE	Ubiquitin carboxyl-terminal hydrolase 1 OS=Homo sapiens OX=9606	USP1	0.0135623	3.13826	N/D	N/D	28	18	350	18	785	88.2	5.45	-0.0267754	0.0405598	0.00195122	-0.065299	-0.0384893	-0.0248718	-0.0159407	-0.0450077	-0.0939064
1.43737	-0.149553	0.90153	O94788	FALSE	Retinal dehydrogenase 2 OS=Homo sapiens OX=9606	ALDH1A2	0.0984701	4.03832	N/D	N/D	5	2	53	2	518	56.7	6.05	-2.06224	-1.89695	-2.04392	-2.1451	-2.15834	-2.02814	-1.88967	-2.00472	-1.86836
1.18075	-0.186697	0.878615	O94804	TRUE	Serine/threonine-protein kinase 10 OS=Homo sapiens OX=9606	STK10	0.121385	4.14037	150.617	N/D	15	11	186	9	968	112.1	6.95	-1.08875	-1.18078	-1.19238	-1.33862	-1.15138	-1.22217	-1.03527	-0.942825	-0.864172
0.654754	-0.583969	0.667126	O94805	FALSE	Actin-like protein 6B OS=Homo sapiens OX=9606	ACTL6B	0.332874	4.69807	3.77544	N/D	12	4	210	1	426	46.8	5.71	-5.14965	-4.12543	-3.52014	-4.21996	-4.22081	-5.37171	-3.92885	-3.78356	-3.6135
0.10584	-0.0144696	0.990021	O94817	FALSE	Ubiquitin-like protein ATG12 OS=Homo sapiens OX=9606	ATG12	0.00997945	3.00346	N/D	N/D	16	3	62	3	140	15.1	5.1	-2.23767	-2.10392	-2.05588	-2.114	-2.05736	-2.16465	-2.00861	-2.06934	-2.10978
1.42367	0.139493	1.10152	O94819	TRUE	Kelch repeat and BTB domain-containing protein 11 OS=Homo sapiens OX=9606	KBTBD11	-0.101518	N/D	N/D	N/D	13	6	131	6	623	65.7	6.07	-1.58599	-1.56137	-1.47104	-1.3355	-1.38518	-1.40002	-1.42984	-1.40777	-1.62234
0.0332641	0.00626866	1.00435	O94822	FALSE	E3 ubiquitin-protein ligase listerin OS=Homo sapiens OX=9606	LTN1	-0.00435456	N/D	N/D	N/D	6	9	41	9	1766	200.4	6.25	-1.2422	-1.22988	-1.37684	-1.29907	-1.32146	-1.39023	-1.49941	-1.29885	-1.41194
0.838304	0.131565	1.09548	O94826	FALSE	Mitochondrial import receptor subunit TOM70 OS=Homo sapiens OX=9606	TOMM70	-0.0954814	N/D	N/D	N/D	40	20	644	20	608	67.4	7.12	1.78285	1.68873	1.44322	1.87297	1.68046	1.76929	1.71607	1.65023	1.57494
0.140451	-0.325915	0.797792	O94829	FALSE	Importin-13 OS=Homo sapiens OX=9606	IPO13	0.202208	4.40391	8.15331	N/D	2	2	9	2	963	108.1	5.3	-5.13197	-1.47586	-5.04861	-4.93755	-4.68101	-4.79126	-4.93964	-4.90764	-5.36041
0.213348	0.0485218	1.0342	O94830	FALSE	Phospholipase DDHD2 OS=Homo sapiens OX=9606	DDHD2	-0.0342048	N/D	N/D	N/D	12	9	116	9	711	81	5.39	-1.52285	-1.76398	-1.45605	-1.5861	-1.38503	-1.59759	-1.66231	-1.41123	-1.61215
0.0140274	0.023438	1.01638	O94832	FALSE	Unconventional myosin-Id OS=Homo sapiens OX=9606	MYO1D	-0.0163787	N/D	N/D	N/D	5	4	36	2	1006	116.1	9.39	-4.80412	-4.73106	-4.87657	-4.98877	-6.16415	-4.98277	-6.63398	-6.32561	-5.04068
2.42258	-0.175237	0.885622	O94842	TRUE	TOX high mobility group box family member 4 OS=Homo sapiens OX=9606	TOX4	0.114378	4.11109	N/D	N/D	19	8	242	6	621	66.2	5.06	-0.39345	-0.536308	-0.448723	-0.645211	-0.652604	-0.717728	-0.569009	-0.510092	-0.522085
1.10587	-0.105836	0.929266	O94851	TRUE	[F-actin]-monooxygenase MICAL2 OS=Homo sapiens OX=9606	MICAL2	0.0707335	3.88149	N/D	N/D	2	3	40	2	1957	218.9	8.34	0.0456543	0.0256786	0.11076	0.0914621	-0.133332	-0.0666237	0.107377	0.11232	0.0162373
0.531759	0.0422978	1.02975	O94855	TRUE	Protein transport protein Sec24D OS=Homo sapiens OX=9606	SEC24D	-0.0297527	N/D	N/D	N/D	8	9	87	8	1032	112.9	7.25	2.30381	2.27068	2.36367	2.38103	2.3199	2.28584	2.30561	2.1978	2.27818
0.18081	-0.0394031	0.973057	O94864	FALSE	STAGA complex 65 subunit gamma OS=Homo sapiens OX=9606	SUPT7L	0.0269426	3.4423	N/D	N/D	8	3	27	3	414	46.2	5.12	-3.7352	-3.67925	-3.71598	-3.88676	-3.83176	-3.66864	-3.95909	-3.83775	-3.61062
0.572336	-0.305861	0.808959	O94868	TRUE	F-BAR and double SH3 domains protein 2 OS=Homo sapiens OX=9606	FCHSD2	0.191041	4.3732	9.24527	N/D	9	6	25	6	740	84.2	5.77	-3.38853	-2.76776	-3.21302	-3.55581	-2.97818	-2.95565	-2.72532	-2.61599	-2.43351
1.78252	0.0429085	1.03019	O94874	FALSE	E3 UFM1-protein ligase 1 OS=Homo sapiens OX=9606	UFL1	-0.0301886	N/D	N/D	N/D	31	26	676	26	794	89.5	6.79	2.27265	2.31894	2.30893	2.34671	2.33316	2.33616	2.30041	2.26342	2.31026
1.76706	-0.522612	0.69611	O94880	TRUE	PHD finger protein 14 OS=Homo sapiens OX=9606	PHF14	0.30389	4.64004	4.21876	N/D	10	7	22	7	888	100	5.33	-3.29103	-3.48585	-2.82317	-3.97898	-3.75623	-3.47304	-3.37287	-3.18466	-3.12325
0.406102	-0.397068	0.7594	O94886	FALSE	CSC1-like protein 1 OS=Homo sapiens OX=9606	TMEM63A	0.2406	4.50082	5.90685	N/D	2	2	13	2	807	92.1	7.27	-5.14466	-4.90744	-5.02574	-5.10583	-5.1995	-4.96609	-3.23386	-5.05626	-4.79247
1.65211	0.0803943	1.05731	O94888	FALSE	UBX domain-containing protein 7 OS=Homo sapiens OX=9606	UBXN7	-0.0573069	N/D	N/D	N/D	29	11	218	11	489	54.8	5.16	0.68055	0.572502	0.621412	0.757207	0.676944	0.705379	0.65058	0.65711	0.61454
0.0328204	-0.0114888	0.992068	O94900	TRUE	Thymocyte selection-associated high mobility group box protein TOX OS=Homo sapiens OX=9606	TOX	0.00793177	2.90283	N/D	N/D	14	5	152	3	526	57.5	7.33	0.377096	0.265699	0.354929	0.230836	0.300765	0.0799847	-0.0875654	0.0504417	0.331503
4.61308	-0.692273	0.618878	O94901	FALSE	SUN domain-containing protein 1 OS=Homo sapiens OX=9606	SUN1	0.381122	4.78946	3.25208	4.78946	15	9	99	9	785	87.1	6.93	-0.736256	-0.648708	-0.713957	-1.29656	-1.5789	-1.40554	-0.664678	-0.798401	-0.846359
0.855025	0.0834181	1.05953	O94903	FALSE	Pyridoxal phosphate homeostasis protein OS=Homo sapiens OX=9606	PLPBP	-0.0595253	N/D	N/D	N/D	33	8	363	8	275	30.3	7.5	1.55859	1.53333	1.52249	1.57607	1.72135	1.69611	1.70887	1.59735	1.5659
0.550184	0.0440831	1.03103	O94905	FALSE	Erlin-2 OS=Homo sapiens OX=9606	ERLIN2	-0.0310277	N/D	N/D	N/D	34	11	315	8	339	37.8	5.62	3.61215	3.62241	3.62802	3.69368	3.61183	3.60104	3.58781	3.48373	3.61448
0.886029	0.0278945	1.01952	O94906	FALSE	Pre-mRNA-processing factor 6 OS=Homo sapiens OX=9606	PRPF6	-0.0195231	N/D	N/D	N/D	41	38	1435	38	941	106.9	8.25	3.59324	3.53004	3.55663	3.58748	3.60519	3.56881	3.54935	3.54199	3.58434
1.33904	0.0643423	1.04561	O94913	FALSE	Pre-mRNA cleavage complex 2 protein Pcf11 OS=Homo sapiens OX=9606	PCF11	-0.0456082	N/D	N/D	N/D	24	27	631	27	1555	172.9	8.48	2.16854	2.11362	2.11762	2.19211	2.2013	2.21223	2.19942	2.07629	2.14975
0.346923	0.0445145	1.03134	O94915	FALSE	Protein furry homolog-like OS=Homo sapiens OX=9606	FRYL	-0.0313361	N/D	N/D	N/D	15	40	748	40	3013	339.4	5.58	1.58732	1.75502	1.75915	1.80763	1.63197	1.74319	1.72916	1.61913	1.64872
0.831731	-0.378294	0.769347	O94916	TRUE	Nuclear factor of activated T-cells 5 OS=Homo sapiens OX=9606	NFAT5	0.230653	4.47684	6.34301	N/D	1	2	4	2	1531	165.7	5.24	-3.93468	-4.01038	-4.47141	-4.43927	-4.08934	-4.63736	-4.34595	-3.721	-3.57875
0.462161	0.0563804	1.03985	O94919	FALSE	Endonuclease domain-containing 1 protein OS=Homo sapiens OX=9606	ENDOD1	-0.0398536	N/D	N/D	N/D	19	8	139	8	500	55	5.71	0.316193	0.354397	0.418884	0.501653	0.438474	0.338915	0.284694	0.498857	0.346775
2.34702	0.13506	1.09814	O94925	FALSE	Glutaminase kidney isoform, mitochondrial OS=Homo sapiens OX=9606	GLS	-0.0981381	N/D	N/D	N/D	39	18	536	18	669	73.4	7.77	2.58313	2.61458	2.57096	2.70751	2.67833	2.76278	2.58833	2.49561	2.63427
1.01137	0.257383	1.19531	O94927	FALSE	HAUS augmin-like complex subunit 5 OS=Homo sapiens OX=9606	HAUS5	-0.195308	N/D	N/D	N/D	21	10	238	10	633	71.6	8.51	-0.254457	-0.562187	-0.144159	0.12474	-0.295932	-0.194595	-0.593089	-0.417955	-0.304024
1.78761	0.437433	1.35419	O94952	FALSE	F-box only protein 21 OS=Homo sapiens OX=9606	FBXO21	-0.354192	N/D	N/D	N/D	7	3	50	3	628	72.2	6.09	-1.11735	-1.10715	-1.54882	-1.01707	-0.974658	-0.891506	-1.4365	-1.61524	-1.56599
0.77737	-0.657974	0.633768	O94953	TRUE	Lysine-specific demethylase 4B OS=Homo sapiens OX=9606	KDM4B	0.366232	4.76183	3.39216	N/D	5	4	10	3	1096	121.8	7.09	-2.83085	-2.92365	-2.76736	-3.26656	-4.83007	-3.23962	-2.9274	-3.44929	-3.82611
2.16544	1.91861	3.7806	O94964	TRUE	Protein SOGA1 OS=Homo sapiens OX=9606	SOGA1	-2.7806	N/D	N/D	N/D	2	3	13	2	1423	159.7	6.46	-5.9605	-5.65543	-6.72486	-3.56086	-5.41487	-3.84457	-5.86393	-7.06858	-5.87898
0.235376	0.0365148	1.02563	O94966	FALSE	Ubiquitin carboxyl-terminal hydrolase 19 OS=Homo sapiens OX=9606	USP19	-0.0256331	N/D	N/D	N/D	13	11	179	11	1318	145.6	6.28	-0.301197	-0.0555344	-0.12751	-0.0666742	-0.0472002	-0.110195	-0.0541487	-0.122585	-0.00625229
0.0729104	0.0232568	1.01625	O94967	TRUE	WD repeat-containing protein 47 OS=Homo sapiens OX=9606	WDR47	-0.016251	N/D	N/D	N/D	9	5	46	5	919	101.9	5.94	-2.18846	-2.08553	-2.1822	-2.32385	-1.90393	-2.12928	-2.15608	-1.91014	-2.33128
0.670059	0.0835894	1.05965	O94973	FALSE	AP-2 complex subunit alpha-2 OS=Homo sapiens OX=9606	AP2A2	-0.0596512	N/D	N/D	N/D	27	25	678	16	939	103.9	6.96	1.99947	1.83098	1.98656	2.10828	2.06361	2.10609	2.02767	2.10147	2.10829
0.525236	0.037367	1.02624	O94979	FALSE	Protein transport protein Sec31A OS=Homo sapiens OX=9606	SEC31A	-0.0262392	N/D	N/D	N/D	23	27	912	27	1220	132.9	6.89	2.36478	2.40224	2.36332	2.45796	2.38394	2.4108	2.33353	2.47142	2.34589
0.641867	0.3029	1.23362	O94985	FALSE	Calsyntenin-1 OS=Homo sapiens OX=9606	CLSTN1	-0.233621	N/D	N/D	N/D	2	1	1	1	981	109.7	4.91	-5.2963	-6.04049	-5.60538	-5.09386	-5.08992	-5.03926	-5.17129	-5.14859	-5.00143
0.731911	0.0529688	1.0374	O94992	TRUE	Protein HEXIM1 OS=Homo sapiens OX=9606	HEXIM1	-0.0373975	N/D	N/D	N/D	45	10	292	10	359	40.6	4.89	1.02039	0.958141	0.926931	1.05728	0.98445	0.969666	0.869994	0.938051	0.991476
1.5481	-0.350863	0.784115	O95059	FALSE	Ribonuclease P protein subunit p14 OS=Homo sapiens OX=9606	RPP14	0.215885	4.43984	7.15264	N/D	7	1	24	1	124	13.7	7.75	-3.51543	-3.65365	-3.57452	-4.06839	-4.28243	-3.72865	-3.70664	-3.77022	-3.83329
0.96171	0.269689	1.20555	O95067	TRUE	G2/mitotic-specific cyclin-B2 OS=Homo sapiens OX=9606	CCNB2	-0.205548	N/D	N/D	N/D	33	11	158	11	398	45.3	8.9	-0.65419	-0.562119	-0.946877	-0.390548	-0.126397	-0.41984	-0.450706	-0.602268	-0.275543
1.45634	-0.0736076	0.950259	O95071	FALSE	E3 ubiquitin-protein ligase UBR5 OS=Homo sapiens OX=9606	UBR5	0.0497412	3.71887	N/D	N/D	24	52	913	52	2799	309.2	5.85	2.90468	2.88627	2.83925	2.82288	2.75924	2.74499	2.80484	2.81494	2.84588
0.825473	-0.645806	0.639136	O95081	FALSE	Arf-GAP domain and FG repeat-containing protein 2 OS=Homo sapiens OX=9606	AGFG2	0.360864	4.75175	3.44682	N/D	2	1	2	1	481	48.9	9.11	-4.98904	-4.62239	-5.07896	-5.09841	-6.81368	-5.07952	-5.16237	-5.26579	-4.98984
0.00464969	0.000414054	1.00029	O95104	TRUE	SR-related and CTD-associated factor 4 OS=Homo sapiens OX=9606	SCAF4	-0.000287041	N/D	N/D	N/D	12	12	247	9	1147	125.8	9.55	0.139912	0.0974598	0.0796967	0.185964	0.0833635	0.105846	0.144303	0.179708	0.106783
0.298066	-0.202528	0.869026	O95139	FALSE	NADH dehydrogenase [ubiquinone] 1 beta subcomplex subunit 6 OS=Homo sapiens OX=9606	NDUFB6	0.130974	4.17815	45.6889	N/D	17	3	184	3	128	15.5	9.63	-1.95614	-1.52123	-1.82816	-2.59391	-1.6672	-2.30309	-2.6173	-2.17506	-1.81534
0.852388	0.303588	1.23421	O95140	TRUE	Mitofusin-2 OS=Homo sapiens OX=9606	MFN2	-0.23421	N/D	N/D	N/D	7	5	32	4	757	86.3	6.98	-3.02511	-2.49848	-2.45162	-2.04693	-2.08391	-2.54151	-2.38718	-2.33147	-2.47235
1.47715	-0.0930931	0.937511	O95149	FALSE	Snurportin-1 OS=Homo sapiens OX=9606	SNUPN	0.0624894	3.82383	N/D	N/D	28	10	288	10	360	41.1	6.64	0.416512	0.291622	0.327032	0.281138	0.296203	0.267467	0.436654	0.418558	0.357798
0.387171	0.0364312	1.02557	O95155	TRUE	Ubiquitin conjugation factor E4 B OS=Homo sapiens OX=9606	UBE4B	-0.0255737	N/D	N/D	N/D	17	17	383	16	1302	146.1	6.55	0.622871	0.678207	0.603277	0.644	0.660331	0.606939	0.556571	0.492279	0.650747
0.826246	0.0937454	1.06714	O95159	TRUE	Zinc finger protein-like 1 OS=Homo sapiens OX=9606	ZFPL1	-0.067137	N/D	N/D	N/D	16	4	79	4	310	34.1	8.07	-1.47019	-1.40925	-1.57546	-1.35446	-1.46963	-1.43832	-1.49567	-1.47656	-1.66017
0.0362218	0.00317272	1.0022	O95163	FALSE	Elongator complex protein 1 OS=Homo sapiens OX=9606	ELP1	-0.00220158	N/D	N/D	N/D	24	29	918	29	1332	150.2	5.94	2.62586	2.59206	2.58815	2.62355	2.62168	2.55258	2.51851	2.60421	2.64779
6.53822	2.52244	5.74554	O95166	FALSE	Gamma-aminobutyric acid receptor-associated protein OS=Homo sapiens OX=9606	GABARAP	-4.74554	N/D	N/D	N/D	20	4	190	2	117	13.9	8.79	-4.88348	-5.15298	-5.15887	-2.53777	-2.58638	-2.38194	-5.00141	-4.68614	-5.26394
0.0522655	0.0127921	1.00891	O95167	FALSE	NADH dehydrogenase [ubiquinone] 1 alpha subcomplex subunit 3 OS=Homo sapiens OX=9606	NDUFA3	-0.00890624	N/D	N/D	N/D	50	3	58	3	84	9.3	8.46	-0.880514	-0.975128	-1.01994	-0.945924	-1.20387	-0.922451	-1.09961	-1.18892	-1.05713
1.38314	0.0705803	1.05014	O95168	FALSE	NADH dehydrogenase [ubiquinone] 1 beta subcomplex subunit 4 OS=Homo sapiens OX=9606	NDUFB4	-0.050139	N/D	N/D	N/D	42	5	135	5	129	15.2	9.85	0.172035	0.146011	0.117308	0.249459	0.169684	0.198301	0.125297	0.0712223	0.179535
1.47882	0.244826	1.18495	O95169	TRUE	NADH dehydrogenase [ubiquinone] 1 beta subcomplex subunit 8, mitochondrial OS=Homo sapiens OX=9606	NDUFB8	-0.18495	N/D	N/D	N/D	17	3	116	3	186	21.8	6.8	-1.62259	-1.63176	-1.55946	-1.31098	-1.63716	-1.29998	-1.58938	-1.77812	-1.78388
2.0501	-0.202585	0.868992	O95178	FALSE	NADH dehydrogenase [ubiquinone] 1 beta subcomplex subunit 2, mitochondrial OS=Homo sapiens OX=9606	NDUFB2	0.131008	4.17828	45.5777	N/D	19	3	75	3	105	12.1	5.74	0.572559	0.696098	0.519344	0.330449	0.475228	0.277071	0.538896	0.546949	0.507158
0.228116	-0.0199707	0.986253	O95182	TRUE	NADH dehydrogenase [ubiquinone] 1 alpha subcomplex subunit 7 OS=Homo sapiens OX=9606	NDUFA7	0.0137473	3.14423	N/D	N/D	65	7	166	7	113	12.5	10.18	-0.709383	-0.758783	-0.705509	-0.693957	-0.702386	-0.765114	-0.733665	-0.600483	-0.695267
0.0967287	-0.0163582	0.988725	O95183	FALSE	Vesicle-associated membrane protein 5 OS=Homo sapiens OX=9606	VAMP5	0.0112746	3.05703	N/D	N/D	28	3	125	2	116	12.8	7.85	-2.51246	-2.57936	-2.45758	-2.64935	-2.50349	-2.50942	-2.50094	-2.47522	-2.70081
1.5024	0.100367	1.07205	O95197	TRUE	Reticulon-3 OS=Homo sapiens OX=9606	RTN3	-0.072046	N/D	N/D	N/D	6	3	115	3	1032	112.5	4.96	0.174923	0.133059	0.113764	0.220681	0.295735	0.289454	0.262076	0.201754	0.123964
2.09849	-0.152403	0.899751	O95202	TRUE	Mitochondrial proton/calcium exchanger protein OS=Homo sapiens OX=9606	LETM1	0.100249	4.04696	N/D	N/D	41	28	941	28	739	83.3	6.7	3.63967	3.62004	3.58513	3.41857	3.55208	3.37396	3.59099	3.5382	3.62961
0.648324	-0.0796714	0.946273	O95214	FALSE	Leptin receptor overlapping transcript-like 1 OS=Homo sapiens OX=9606	LEPROTL1	0.0537268	3.75417	N/D	N/D	10	1	45	1	131	14.4	5.9	-2.16166	-2.17595	-2.23398	-2.30595	-2.28927	-2.08207	-2.13265	-2.12345	-2.04883
2.49964	0.0817768	1.05832	O95218	FALSE	Zinc finger Ran-binding domain-containing protein 2 OS=Homo sapiens OX=9606	ZRANB2	-0.0583206	N/D	N/D	N/D	43	21	967	21	330	37.4	10.01	3.11155	3.10034	3.11566	3.21482	3.21519	3.19403	3.11874	3.18533	3.12579
0.309973	-0.0973611	0.934741	O95229	TRUE	ZW10 interactor OS=Homo sapiens OX=9606	ZWINT	0.0652588	3.84395	N/D	N/D	40	9	142	9	277	31.3	5.15	-0.306623	-0.0894852	-0.384518	-0.523088	-0.244679	-0.00370407	0.0110292	-0.0881233	-0.101055
1.35518	-0.0777097	0.947561	O95232	FALSE	Luc7-like protein 3 OS=Homo sapiens OX=9606	LUC7L3	0.0524393	3.74305	N/D	N/D	26	11	398	11	432	51.4	9.79	2.00636	2.02102	2.10817	1.97684	1.94086	1.90317	2.00858	1.9676	1.99627
0.265597	-0.0334465	0.977083	O95235	FALSE	Kinesin-like protein KIF20A OS=Homo sapiens OX=9606	KIF20A	0.0229167	3.37022	N/D	N/D	24	14	238	14	890	100.2	6.92	-0.358212	-0.339361	-0.51462	-0.436999	-0.556777	-0.387253	-0.42063	-0.456161	-0.472395
1.99908	-0.0689454	0.953335	O95239	TRUE	Chromosome-associated kinesin KIF4A OS=Homo sapiens OX=9606	KIF4A	0.0466654	3.68975	N/D	N/D	39	42	997	41	1232	139.8	6.27	2.60035	2.65971	2.6137	2.55225	2.58467	2.52465	2.58825	2.63169	2.6431
0.325714	-0.147325	0.902923	O95243	TRUE	Methyl-CpG-binding domain protein 4 OS=Homo sapiens OX=9606	MBD4	0.0970767	4.03146	N/D	N/D	4	2	12	2	580	66	8.82	-2.39939	-2.22628	-2.11396	-2.27087	-1.9803	-2.12232	-1.66958	-1.7803	-1.67353
6.86039	-1.07368	0.475106	O95248	TRUE	Myotubularin-related protein 5 OS=Homo sapiens OX=9606	SBF1	0.524894	5.04328	2.41897	5.04328	19	29	275	29	1868	208.3	6.9	0.553469	0.63283	0.57177	-0.411281	-0.508391	-0.63928	0.500653	0.533928	0.531527
1.79471	0.229769	1.17265	O95249	FALSE	Golgi SNAP receptor complex member 1 OS=Homo sapiens OX=9606	GOSR1	-0.172647	N/D	N/D	N/D	26	7	113	7	250	28.6	9.42	-0.673645	-0.671753	-0.87925	-0.477511	-0.482675	-0.69223	-0.879821	-0.764755	-0.81422
0.279886	0.196112	1.14561	O95251	TRUE	Histone acetyltransferase KAT7 OS=Homo sapiens OX=9606	KAT7	-0.145607	N/D	N/D	N/D	15	7	43	7	611	70.6	8.85	-2.13026	-2.22117	-1.28361	-1.75001	-1.50685	-1.45256	-2.06469	-1.82785	-1.06793
0.0622126	0.0118187	1.00823	O95260	TRUE	Arginyl-tRNA--protein transferase 1 OS=Homo sapiens OX=9606	ATE1	-0.00822576	N/D	N/D	N/D	11	5	67	5	518	59.1	7.93	-0.475317	-0.724651	-0.708765	-0.664542	-0.72996	-0.591148	-0.771981	-0.7104	-0.6511
0.78866	-0.840109	0.558601	O95273	FALSE	Cyclin-D1-binding protein 1 OS=Homo sapiens OX=9606	CCNDBP1	0.441399	4.89773	2.8149	N/D	4	1	1	1	360	40.2	4.82	-4.85908	-5.39927	-5.69147	-6.04675	-5.0719	-5.50105	-4.18224	-4.71436	-3.35232
0.0107498	0.0128652	1.00896	O95292	FALSE	Vesicle-associated membrane protein-associated protein B/C OS=Homo sapiens OX=9606	VAPB	-0.00895737	N/D	N/D	N/D	45	10	217	9	243	27.2	7.3	-1.07131	-1.38577	-0.140198	-1.30958	-1.1935	-0.212379	-0.284762	-1.38531	-1.24076
0.204527	-0.0243452	0.983267	O95295	TRUE	SNARE-associated protein Snapin OS=Homo sapiens OX=9606	SNAPIN	0.0167333	3.23091	N/D	N/D	59	6	102	6	136	14.9	9.31	0.172428	-0.00704765	0.0752563	0.112529	0.0660315	0.0741711	0.159846	0.0597134	0.191338
0.567211	0.0552239	1.03902	O95297	FALSE	Myelin protein zero-like protein 1 OS=Homo sapiens OX=9606	MPZL1	-0.0390204	N/D	N/D	N/D	12	4	102	4	269	29.1	8.72	-1.03623	-0.996208	-0.925049	-0.821313	-1.01564	-0.928204	-0.970206	-0.921621	-1.01234
0.855739	0.071418	1.05075	O95298	FALSE	NADH dehydrogenase [ubiquinone] 1 subunit C2 OS=Homo sapiens OX=9606	NDUFC2	-0.0507489	N/D	N/D	N/D	44	6	185	6	119	14.2	8.98	-0.103821	-0.0889606	-0.166969	-0.0362864	0.0580664	-0.0184784	-0.0612898	-0.00115013	0.000286102
1.72472	0.118583	1.08567	O95299	FALSE	NADH dehydrogenase [ubiquinone] 1 alpha subcomplex subunit 10, mitochondrial OS=Homo sapiens OX=9606	NDUFA10	-0.0856682	N/D	N/D	N/D	33	10	264	10	355	40.7	8.48	1.5693	1.69136	1.58811	1.79918	1.73451	1.77046	1.68247	1.72721	1.63834
1.38929	0.0817707	1.05832	O95319	FALSE	CUGBP Elav-like family member 2 OS=Homo sapiens OX=9606	CELF2	-0.0583162	N/D	N/D	N/D	20	9	427	7	508	54.3	8.76	1.9475	2.06594	2.01017	2.10414	2.12101	2.08183	2.05812	2.07205	1.96957
0.832616	0.0715445	1.05084	O95336	FALSE	6-phosphogluconolactonase OS=Homo sapiens OX=9606	PGLS	-0.0508411	N/D	N/D	N/D	74	13	701	13	258	27.5	6.05	2.95016	2.86001	3.01465	3.07983	3.01529	2.96643	3.02974	2.91722	2.92205
2.57999	0.10937	1.07876	O95347	FALSE	Structural maintenance of chromosomes protein 2 OS=Homo sapiens OX=9606	SMC2	-0.0787571	N/D	N/D	N/D	39	50	2168	50	1197	135.6	8.43	4.7058	4.70157	4.68264	4.85765	4.83556	4.7484	4.7029	4.73441	4.69965
0.0946774	0.0361149	1.02535	O95352	FALSE	Ubiquitin-like modifier-activating enzyme ATG7 OS=Homo sapiens OX=9606	ATG7	-0.0253489	N/D	N/D	N/D	17	12	150	12	703	77.9	6.24	-0.342407	-0.536495	-0.356319	-0.529252	-0.0242281	-0.227495	-0.199683	-0.317308	-0.0264263
1.05741	0.0747625	1.05319	O95363	FALSE	Phenylalanine--tRNA ligase, mitochondrial OS=Homo sapiens OX=9606	FARS2	-0.0531876	N/D	N/D	N/D	25	10	156	10	451	52.3	7.46	1.37927	1.28285	1.32948	1.43462	1.47515	1.39389	1.32487	1.40374	1.43855
1.23987	-0.482457	0.715758	O95365	FALSE	Zinc finger and BTB domain-containing protein 7A OS=Homo sapiens OX=9606	ZBTB7A	0.284242	4.59892	4.60626	N/D	4	2	4	2	584	61.4	5.19	-4.72926	-4.80043	-5.33155	-5.52165	-5.57669	-5.84708	-5.14913	-5.54994	-5.43578
2.37068	1.27622	2.42203	O95372	FALSE	Acyl-protein thioesterase 2 OS=Homo sapiens OX=9606	LYPLA2	-1.42203	N/D	N/D	N/D	37	7	142	7	231	24.7	7.23	0.0175362	-0.174107	-0.0445137	1.43602	1.79669	1.13156	0.805476	-0.266024	0.732843
0.357077	-0.0343785	0.976452	O95373	FALSE	Importin-7 OS=Homo sapiens OX=9606	IPO7	0.0235477	3.3823	N/D	N/D	26	25	649	25	1038	119.4	4.82	2.9236	2.87609	2.85419	2.82045	2.87279	2.77716	2.88553	2.87008	2.73759
0.688148	0.0815978	1.05819	O95376	FALSE	E3 ubiquitin-protein ligase ARIH2 OS=Homo sapiens OX=9606	ARIH2	-0.0581894	N/D	N/D	N/D	16	7	220	7	493	57.8	5.63	-0.829153	-0.919937	-1.05007	-0.756774	-0.849399	-0.795525	-0.802724	-0.813923	-0.877174
0.0234603	0.00573397	1.00398	O95379	FALSE	Tumor necrosis factor alpha-induced protein 8 OS=Homo sapiens OX=9606	TNFAIP8	-0.00398239	N/D	N/D	N/D	29	5	97	5	198	23	7.93	-0.192364	0.0275517	0.050909	-0.0771379	0.0820208	-0.184647	-0.130841	0.0248337	-0.174021
0.93003	-0.139714	0.907699	O95391	TRUE	Pre-mRNA-splicing factor SLU7 OS=Homo sapiens OX=9606	SLU7	0.092301	4.00726	N/D	N/D	41	21	267	21	586	68.3	7.14	-0.0296574	0.118916	0.0952129	-0.27525	-0.111249	-0.00285339	-0.155444	0.0206108	0.0099411
0.329488	-0.0516194	0.964853	O95394	FALSE	Phosphoacetylglucosamine mutase OS=Homo sapiens OX=9606	PGM3	0.0351473	3.56143	N/D	N/D	22	12	129	12	542	59.8	6.25	0.28355	0.321957	0.265013	0.157104	0.289636	0.206919	0.0830126	0.398794	0.264706
0.405647	-0.153505	0.899063	O95396	TRUE	Adenylyltransferase and sulfurtransferase MOCS3 OS=Homo sapiens OX=9606	MOCS3	0.100937	4.05026	N/D	N/D	8	3	31	3	460	49.6	6.21	-2.51979	-3.01237	-2.92586	-3.15084	-2.98036	-3.25945	-2.97932	-3.07783	-3.34512
0.701861	-0.0500763	0.965885	O95400	TRUE	CD2 antigen cytoplasmic tail-binding protein 2 OS=Homo sapiens OX=9606	CD2BP2	0.0341148	3.54802	N/D	N/D	25	8	196	8	341	37.6	4.61	0.245888	0.189964	0.123384	0.112597	0.14961	0.0633945	0.118009	0.111988	0.162428
0.666466	-0.438146	0.738082	O95402	TRUE	Mediator of RNA polymerase II transcription subunit 26 OS=Homo sapiens OX=9606	MED26	0.261918	4.55006	5.17378	N/D	7	3	13	3	600	65.4	9.16	-3.06781	-3.94885	-4.10452	-3.96748	-4.39074	-3.63414	-3.86263	-2.96132	-3.41072
1.69179	0.132908	1.0965	O95425	TRUE	Supervillin OS=Homo sapiens OX=9606	SVIL	-0.0965017	N/D	N/D	N/D	1	2	21	2	2214	247.6	6.98	-1.49201	-1.39427	-1.58325	-1.34213	-1.37546	-1.29464	-1.44324	-1.40877	-1.50039
1.45275	-0.335832	0.792327	O95429	TRUE	BAG family molecular chaperone regulator 4 OS=Homo sapiens OX=9606	BAG4	0.207673	4.41848	7.71715	N/D	14	3	36	3	457	49.6	5.12	-2.43704	-2.1787	-2.25819	-2.47092	-2.54248	-2.35892	-1.95104	-2.01581	-1.88886
2.16434	0.0815829	1.05818	O95433	FALSE	Activator of 90 kDa heat shock protein ATPase homolog 1 OS=Homo sapiens OX=9606	AHSA1	-0.0581784	N/D	N/D	N/D	70	24	1797	24	338	38.3	5.53	5.0392	5.1197	5.12332	5.17001	5.15565	5.15397	5.0762	5.06078	5.05056
0.0704043	0.00414101	1.00287	O95453	TRUE	Poly(A)-specific ribonuclease PARN OS=Homo sapiens OX=9606	PARN	-0.00287445	N/D	N/D	N/D	37	27	609	27	639	73.4	6.2	2.44663	2.45004	2.43495	2.42547	2.43553	2.40218	2.37562	2.3761	2.41815
2.75761	0.0896414	1.06411	O95456	FALSE	Proteasome assembly chaperone 1 OS=Homo sapiens OX=9606	PSMG1	-0.0641057	N/D	N/D	N/D	42	12	357	12	288	32.8	7.17	2.42345	2.40065	2.43547	2.53468	2.4676	2.51845	2.43645	2.38314	2.42446
1.07664	0.0439744	1.03095	O95466	TRUE	Formin-like protein 1 OS=Homo sapiens OX=9606	FMNL1	-0.03095	N/D	N/D	N/D	24	28	612	28	1100	121.8	5.72	2.56837	2.56772	2.52781	2.59988	2.57948	2.54271	2.51462	2.5099	2.49188
0.0770417	0.0108205	1.00753	O95470	FALSE	Sphingosine-1-phosphate lyase 1 OS=Homo sapiens OX=9606	SGPL1	-0.00752843	N/D	N/D	N/D	22	12	262	12	568	63.5	9.16	1.16302	1.18994	1.22655	1.21504	1.07676	1.18782	1.01718	1.13996	1.15767
1.0897	0.135667	1.0986	O95475	FALSE	Homeobox protein SIX6 OS=Homo sapiens OX=9606	SIX6	-0.0986006	N/D	N/D	N/D	32	6	111	6	246	27.7	9.42	-0.0344124	-0.048151	0.100626	0.097867	0.251651	0.0177345	0.0770178	-0.0765934	-0.0979843
1.05753	0.112242	1.08091	O95478	FALSE	Ribosome biogenesis protein NSA2 homolog OS=Homo sapiens OX=9606	NSA2	-0.0809064	N/D	N/D	N/D	33	8	277	8	260	30	10.27	0.49905	0.553587	0.577923	0.724927	0.570058	0.673359	0.61785	0.609764	0.405064
0.834268	-0.46217	0.725894	O95479	TRUE	GDH/6PGL endoplasmic bifunctional protein OS=Homo sapiens OX=9606	H6PD	0.274106	4.57705	4.84397	N/D	7	5	25	5	791	88.8	7.3	-2.18178	-2.04107	-1.22241	-2.16331	-2.41228	-2.89217	-2.40276	-2.16431	-2.15018
0.384964	-0.0238392	0.983612	O95486	TRUE	Protein transport protein Sec24A OS=Homo sapiens OX=9606	SEC24A	0.0163883	3.22171	N/D	N/D	16	13	266	13	1093	119.7	7.66	0.0397739	0.114546	0.0182495	0.0292082	0.0455694	0.0813999	0.129786	0.0740318	0.0790024
0.820976	-0.0570041	0.961258	O95487	FALSE	Protein transport protein Sec24B OS=Homo sapiens OX=9606	SEC24B	0.0387418	3.60534	N/D	N/D	15	15	343	15	1268	137.3	6.67	0.712236	0.856255	0.810574	0.728408	0.763167	0.67345	0.749473	0.749208	0.794331
1.07808	-0.37853	0.769221	O95544	FALSE	NAD kinase OS=Homo sapiens OX=9606	NADK	0.230779	4.47714	6.33703	N/D	13	4	42	4	446	49.2	6.47	-1.87549	-2.23222	-1.9455	-2.71933	-2.22246	-2.38084	-2.14555	-2.46102	-1.71433
0.0483194	-0.0221095	0.984792	O95551	FALSE	Tyrosyl-DNA phosphodiesterase 2 OS=Homo sapiens OX=9606	TDP2	0.0152083	3.18874	N/D	N/D	17	6	170	6	362	40.9	5.1	0.170372	-0.396807	0.123262	0.225492	0.110251	-0.218725	0.208463	0.14053	0.120872
0.404586	-0.373612	0.771848	O95562	FALSE	Vesicle transport protein SFT2B OS=Homo sapiens OX=9606	SFT2D2	0.228152	4.47069	6.46498	N/D	6	1	28	1	160	17.8	9.13	-3.65152	-2.60766	-2.42385	-3.42926	-2.60786	-3.97135	-3.08958	-2.49325	-3.5094
1.40714	0.171869	1.12652	O95563	FALSE	Mitochondrial pyruvate carrier 2 OS=Homo sapiens OX=9606	MPC2	-0.126517	N/D	N/D	N/D	39	4	77	4	127	14.3	10.43	-1.28391	-1.04486	-1.25292	-0.988172	-0.929481	-0.957956	-1.07777	-1.01323	-1.10974
0.806018	0.0530616	1.03746	O95568	FALSE	Histidine protein methyltransferase 1 homolog OS=Homo sapiens OX=9606	METTL18	-0.0374643	N/D	N/D	N/D	8	3	21	3	372	42.1	6.76	-2.43568	-2.37864	-2.47896	-2.32184	-2.37004	-2.34567	-2.33449	-2.41141	-2.35427
0.470297	0.0738358	1.05251	O95571	FALSE	Persulfide dioxygenase ETHE1, mitochondrial OS=Homo sapiens OX=9606	ETHE1	-0.0525114	N/D	N/D	N/D	39	7	223	7	254	27.9	6.83	-0.403303	-0.451567	-0.246616	-0.203187	-0.367482	-0.218618	-0.344937	-0.175182	-0.399984
2.69586	0.113501	1.08185	O95573	FALSE	Fatty acid CoA ligase Acsl3 OS=Homo sapiens OX=9606	ACSL3	-0.0818504	N/D	N/D	N/D	37	23	800	22	720	80.4	8.38	1.96474	2.04402	2.00018	2.1301	2.16586	2.10568	2.06446	2.02802	2.02087
0.388856	-0.0442545	0.969791	O95602	FALSE	DNA-directed RNA polymerase I subunit RPA1 OS=Homo sapiens OX=9606	POLR1A	0.0302092	3.49346	N/D	N/D	31	43	729	42	1720	194.7	7.03	2.24665	2.25907	2.43975	2.26766	2.30406	2.29348	2.41972	2.34936	2.28139
0.134097	-0.0162508	0.988799	O95613	TRUE	Pericentrin OS=Homo sapiens OX=9606	PCNT	0.011201	3.05415	N/D	N/D	11	34	324	34	3336	377.8	5.55	1.51043	1.39498	1.4584	1.51886	1.41471	1.42392	1.51548	1.38441	1.5488
0.526401	-0.093204	0.937439	O95619	FALSE	YEATS domain-containing protein 4 OS=Homo sapiens OX=9606	YEATS4	0.0625615	3.82436	N/D	N/D	36	9	158	9	227	26.5	8.41	0.149511	0.365139	0.172796	0.161206	0.279544	0.228975	0.304219	0.439278	0.467731
0.224909	-0.244908	0.843869	O95620	FALSE	tRNA-dihydrouridine(20a/20b) synthase [NAD(P)+]-like OS=Homo sapiens OX=9606	DUS4L	0.156131	4.26721	16.7064	N/D	3	1	10	1	317	35.8	7.33	-5.62531	-5.77769	-3.84413	-5.52032	-5.55669	-5.63678	-5.74178	-5.46965	-5.49956
0.244995	-0.0918298	0.938332	O95625	FALSE	Zinc finger and BTB domain-containing protein 11 OS=Homo sapiens OX=9606	ZBTB11	0.0616681	3.8177	N/D	N/D	17	15	127	15	1053	119.3	8.66	-0.2125	-0.858139	-0.552153	-0.891658	-0.757709	-0.569309	-0.744342	-0.739523	-0.779716
0.400033	0.0521986	1.03684	O95628	TRUE	CCR4-NOT transcription complex subunit 4 OS=Homo sapiens OX=9606	CNOT4	-0.0368438	N/D	N/D	N/D	25	9	119	9	575	63.5	7.03	1.69421	1.55377	1.58637	1.63846	1.58888	1.74027	1.6169	1.47731	1.69346
2.30562	0.145405	1.10604	O95630	FALSE	STAM-binding protein OS=Homo sapiens OX=9606	STAMBP	-0.106041	N/D	N/D	N/D	30	11	317	11	424	48	6.29	0.569708	0.604342	0.476694	0.74574	0.716537	0.683525	0.63951	0.537628	0.591293
0.721006	-0.053747	0.963431	O95639	FALSE	Cleavage and polyadenylation specificity factor subunit 4 OS=Homo sapiens OX=9606	CPSF4	0.0365692	3.57929	N/D	N/D	46	10	252	10	269	30.2	8.31	0.561817	0.564684	0.635342	0.466054	0.491231	0.564583	0.547519	0.47308	0.583776
0.0354803	0.0197469	1.01378	O95644	TRUE	Nuclear factor of activated T-cells, cytoplasmic 1 OS=Homo sapiens OX=9606	NFATC1	-0.0137816	N/D	N/D	N/D	1	1	7	1	943	101.2	6.99	-4.74755	-4.58799	-4.41019	-4.79424	-4.24499	-4.49364	-4.66293	-4.7409	-4.03466
1.17043	0.166216	1.12211	O95671	FALSE	Probable bifunctional dTTP/UTP pyrophosphatase/methyltransferase protein OS=Homo sapiens OX=9606	ASMTL	-0.122112	N/D	N/D	N/D	18	8	168	8	621	68.8	6.07	-0.578594	-0.735714	-0.748247	-0.583333	-0.656629	-0.550913	-0.965489	-0.794241	-0.75676
0.219804	-0.0393926	0.973065	O95674	FALSE	Phosphatidate cytidylyltransferase 2 OS=Homo sapiens OX=9606	CDS2	0.0269355	3.44218	N/D	N/D	16	5	47	5	445	51.4	7.09	-1.5553	-1.659	-1.50513	-1.62576	-1.79265	-1.55143	-1.68274	-1.7455	-1.55566
0.280452	-0.0570699	0.961214	O95684	FALSE	Centrosomal protein 43 OS=Homo sapiens OX=9606	CEP43	0.0387857	3.60585	N/D	N/D	28	9	203	9	399	43	4.81	0.465246	0.662123	0.60848	0.364697	0.489053	0.597588	0.6559	0.497637	0.355709
0.599824	-0.194762	0.873717	O95696	TRUE	Bromodomain-containing protein 1 OS=Homo sapiens OX=9606	BRD1	0.126283	4.15997	69.0426	N/D	2	2	3	2	1058	119.4	8.6	-4.13474	-4.65844	-4.43385	-4.42196	-4.5953	-4.40191	-4.2431	-4.27691	-3.92274
0.198075	-0.107753	0.928032	O95707	FALSE	Ribonuclease P protein subunit p29 OS=Homo sapiens OX=9606	POP4	0.0719676	3.88957	N/D	N/D	25	5	84	5	220	25.4	10.07	-1.95082	-2.03651	-2.19938	-1.62288	-2.26836	-1.88174	-1.73975	-1.5486	-1.4244
0.893286	-0.0964602	0.935325	O95714	TRUE	E3 ubiquitin-protein ligase HERC2 OS=Homo sapiens OX=9606	HERC2	0.0646749	3.83977	N/D	N/D	9	35	232	35	4834	526.9	6.28	1.46434	1.37774	1.37863	1.33738	1.17911	1.25198	1.26247	1.25891	1.3736
2.33119	0.0867333	1.06196	O95721	TRUE	Synaptosomal-associated protein 29 OS=Homo sapiens OX=9606	SNAP29	-0.0619629	N/D	N/D	N/D	50	10	309	10	258	29	5.81	0.723047	0.749792	0.740469	0.833234	0.851834	0.849941	0.774487	0.820826	0.740997
0.63893	0.0631989	1.04478	O95747	FALSE	Serine/threonine-protein kinase OSR1 OS=Homo sapiens OX=9606	OXSR1	-0.0447798	N/D	N/D	N/D	30	14	496	11	527	58	6.43	2.33646	2.43557	2.32349	2.43952	2.49905	2.35686	2.32461	2.47036	2.32116
1.61614	0.116306	1.08396	O95749	FALSE	Geranylgeranyl pyrophosphate synthase OS=Homo sapiens OX=9606	GGPS1	-0.0839555	N/D	N/D	N/D	26	7	146	7	300	34.8	6.14	-0.288252	-0.241453	-0.189924	-0.113235	-0.185674	-0.171415	-0.369773	-0.238171	-0.310907
0.194331	-0.0220221	0.984851	O95757	FALSE	Heat shock 70 kDa protein 4L OS=Homo sapiens OX=9606	HSPA4L	0.0151486	3.187	N/D	N/D	43	31	881	26	839	94.5	5.88	3.15872	3.03062	3.03243	3.05594	3.09795	3.03253	3.13909	2.9956	3.14851
1.73417	0.057611	1.04074	O95758	TRUE	Polypyrimidine tract-binding protein 3 OS=Homo sapiens OX=9606	PTBP3	-0.0407409	N/D	N/D	N/D	18	8	525	6	552	59.7	9.04	0.102318	0.13208	0.108051	0.21053	0.187337	0.195786	0.164134	0.160425	0.174631
0.0820705	-0.0252856	0.982626	O95772	FALSE	STARD3 N-terminal-like protein OS=Homo sapiens OX=9606	STARD3NL	0.0173739	3.24751	N/D	N/D	15	3	59	3	234	26.6	4.81	-1.79472	-1.78807	-1.93017	-1.63902	-1.72544	-2.05802	-1.78738	-1.83939	-1.55352
0.448919	0.0739036	1.05256	O95777	FALSE	U6 snRNA-associated Sm-like protein LSm8 OS=Homo sapiens OX=9606	LSM8	-0.0525608	N/D	N/D	N/D	48	4	320	4	96	10.4	4.48	2.18338	2.09043	2.26647	2.3204	2.39773	2.15117	2.19335	2.18559	2.37595
0.134053	-0.0179893	0.987608	O95782	TRUE	AP-2 complex subunit alpha-1 OS=Homo sapiens OX=9606	AP2A1	0.0123918	3.09855	N/D	N/D	42	34	1068	25	977	107.5	7.03	4.13924	4.06057	4.13792	4.22988	4.12907	4.10263	4.19515	4.26017	4.23805
5.14127	-0.481651	0.716158	O95785	TRUE	Protein Wiz OS=Homo sapiens OX=9606	WIZ	0.283842	4.59807	4.61509	4.59807	4	5	10	5	1651	178.6	6.86	-3.11575	-3.0929	-3.06361	-3.53592	-3.6947	-3.53851	-3.14873	-3.07554	-3.15181
0.462129	0.106693	1.07676	O95786	FALSE	Antiviral innate immune response receptor RIG-I OS=Homo sapiens OX=9606	DDX58	-0.0767575	N/D	N/D	N/D	19	18	207	18	925	106.5	6.4	0.296837	0.473322	0.308039	0.281369	0.547873	0.540934	0.41141	0.103096	0.507488
1.28353	0.065722	1.04661	O95793	FALSE	Double-stranded RNA-binding protein Staufen homolog 1 OS=Homo sapiens OX=9606	STAU1	-0.0466086	N/D	N/D	N/D	52	26	749	24	577	63.1	9.44	1.8106	1.77162	1.76726	1.89468	1.84445	1.85022	1.80402	1.75578	1.87509
0.330879	-0.0207273	0.985736	O95801	FALSE	Tetratricopeptide repeat protein 4 OS=Homo sapiens OX=9606	TTC4	0.0142644	3.16049	N/D	N/D	35	15	355	15	387	44.7	5.6	0.979301	0.886366	0.914452	0.910382	0.895507	0.96302	0.931626	0.982271	0.968166
0.79636	-0.439106	0.737591	O95807	FALSE	Transmembrane protein 50A OS=Homo sapiens OX=9606	TMEM50A	0.262409	4.55116	5.15942	N/D	6	1	20	1	157	17.4	5.87	-4.84054	-5.07388	-5.30628	-5.55022	-5.13036	-5.36454	-4.07878	-4.89507	-5.26102
0.405426	0.0244765	1.01711	O95816	FALSE	BAG family molecular chaperone regulator 2 OS=Homo sapiens OX=9606	BAG2	-0.0171106	N/D	N/D	N/D	69	15	610	15	211	23.8	6.7	3.11916	3.18047	3.22192	3.16971	3.21869	3.16417	3.12335	3.17956	3.13382
0.310096	0.0489446	1.03451	O95817	TRUE	BAG family molecular chaperone regulator 3 OS=Homo sapiens OX=9606	BAG3	-0.0345079	N/D	N/D	N/D	51	20	401	20	575	61.6	6.95	0.461262	0.471445	0.34185	0.652083	0.506412	0.453117	0.524861	0.621222	0.508917
1.64286	-0.107284	0.928334	O95819	TRUE	Mitogen-activated protein kinase kinase kinase kinase 4 OS=Homo sapiens OX=9606	MAP4K4	0.071666	3.88761	N/D	N/D	38	40	1431	28	1239	142	7.46	2.37234	2.39352	2.33023	2.23924	2.24011	2.17872	2.3156	2.22733	2.32082
0.335868	-0.129386	0.91422	O95822	TRUE	Malonyl-CoA decarboxylase, mitochondrial OS=Homo sapiens OX=9606	MLYCD	0.0857796	3.97233	N/D	N/D	6	2	9	2	493	55	8.95	-5.11364	-4.84926	-4.66661	-4.70411	-5.20529	-4.77843	-4.58305	-4.86391	-4.52287
0.721796	-0.168473	0.889784	O95825	FALSE	Quinone oxidoreductase-like protein 1 OS=Homo sapiens OX=9606	CRYZL1	0.110216	4.09296	N/D	N/D	23	7	89	7	349	38.7	5.78	-0.745644	-0.594519	-0.884928	-0.735099	-1.05545	-1.01988	-0.834559	-0.97263	-0.577736
0.305487	0.0180087	1.01256	O95831	FALSE	Apoptosis-inducing factor 1, mitochondrial OS=Homo sapiens OX=9606	AIFM1	-0.0125609	N/D	N/D	N/D	44	24	901	24	613	66.9	8.95	3.41237	3.33952	3.31969	3.37398	3.33728	3.36247	3.29105	3.33717	3.33962
0.124092	0.0477783	1.03367	O95834	FALSE	Echinoderm microtubule-associated protein-like 2 OS=Homo sapiens OX=9606	EML2	-0.0336719	N/D	N/D	N/D	19	10	113	10	649	70.6	6.32	0.743958	1.10847	1.17123	1.23245	1.24992	1.21091	1.38159	1.31724	1.37743
0.0624002	0.012582	1.00876	O95837	FALSE	Guanine nucleotide-binding protein subunit alpha-14 OS=Homo sapiens OX=9606	GNA14	-0.00875931	N/D	N/D	N/D	8	3	110	1	355	41.5	6.07	-4.25881	-4.53766	-4.45748	-4.42045	-4.33884	-4.48503	-4.51914	-4.46568	-4.32537
1.4094	0.0733396	1.05215	O95861	FALSE	3'(2'),5'-bisphosphate nucleotidase 1 OS=Homo sapiens OX=9606	BPNT1	-0.0521494	N/D	N/D	N/D	46	13	652	13	308	33.4	5.69	2.81755	2.82174	2.82516	2.89678	2.87296	2.80984	2.73934	2.76458	2.75076
0.339188	0.0181149	1.01264	O95864	FALSE	Acyl-CoA 6-desaturase OS=Homo sapiens OX=9606	FADS2	-0.0126354	N/D	N/D	N/D	27	11	285	11	444	52.2	8.82	2.26171	2.23079	2.3083	2.29799	2.30121	2.25138	2.27656	2.29354	2.22154
0.73418	0.283473	1.21712	O95865	TRUE	N(G),N(G)-dimethylarginine dimethylaminohydrolase 2 OS=Homo sapiens OX=9606	DDAH2	-0.217121	N/D	N/D	N/D	34	8	165	8	285	29.6	6.01	-0.728909	-0.692585	-0.446035	-0.374164	-0.501662	-0.428629	-1.31364	-0.694777	-0.433805
0.864151	0.155594	1.11388	O95870	FALSE	Phosphatidylserine lipase ABHD16A OS=Homo sapiens OX=9606	ABHD16A	-0.11388	N/D	N/D	N/D	24	10	197	10	558	63.2	8.13	0.500359	0.474785	0.546432	0.661157	0.842357	0.725988	0.812463	0.472385	0.719013
0.625491	0.104824	1.07536	O95881	FALSE	Thioredoxin domain-containing protein 12 OS=Homo sapiens OX=9606	TXNDC12	-0.0753631	N/D	N/D	N/D	35	5	82	5	172	19.2	5.4	0.368259	0.172699	0.365356	0.448016	0.46979	0.53738	0.353997	0.579481	0.441637
0.367808	-0.0293199	0.979882	O95900	FALSE	Mitochondrial mRNA pseudouridine synthase TRUB2 OS=Homo sapiens OX=9606	TRUB2	0.0201179	3.31241	N/D	N/D	16	5	30	5	331	36.7	8.98	-1.1569	-1.13879	-1.19174	-1.17955	-1.23382	-1.26185	-1.21259	-1.28757	-1.18696
0.218683	-0.0736203	0.95025	O95905	FALSE	Protein ecdysoneless homolog OS=Homo sapiens OX=9606	ECD	0.0497496	3.71895	N/D	N/D	13	8	127	8	644	72.7	4.87	-1.04729	-1.29531	-0.91017	-1.45477	-0.959559	-1.09947	-1.28941	-1.05777	-0.985935
0.302886	-0.091983	0.938232	O95926	FALSE	Pre-mRNA-splicing factor SYF2 OS=Homo sapiens OX=9606	SYF2	0.0617677	3.81845	N/D	N/D	43	9	150	9	243	28.7	8.4	-0.391523	-0.420271	-0.442856	-0.420089	-0.565297	-0.358564	0.0564547	-0.488157	-0.44965
2.00871	0.143175	1.10433	O95983	FALSE	Methyl-CpG-binding domain protein 3 OS=Homo sapiens OX=9606	MBD3	-0.104333	N/D	N/D	N/D	36	9	190	8	291	32.8	5.34	0.299046	0.35532	0.412506	0.596477	0.525681	0.499752	0.442651	0.412457	0.462791
1.88546	-0.37261	0.772384	O95985	TRUE	DNA topoisomerase 3-beta-1 OS=Homo sapiens OX=9606	TOP3B	0.227616	4.46937	6.49184	N/D	10	7	46	7	862	96.6	8.12	-2.21429	-1.86636	-2.01937	-2.46374	-2.60077	-2.25911	-2.03109	-2.28605	-1.99442
3.46763	0.217623	1.16282	O95989	FALSE	Diphosphoinositol polyphosphate phosphohydrolase 1 OS=Homo sapiens OX=9606	NUDT3	-0.162816	N/D	N/D	N/D	10	3	77	1	172	19.5	6.34	-1.94038	-1.9684	-2.04335	-1.76837	-1.68306	-1.75735	-1.9239	-1.93705	-1.91021
2.26935	0.127046	1.09206	O95999	FALSE	B-cell lymphoma/leukemia 10 OS=Homo sapiens OX=9606	BCL10	-0.0920554	N/D	N/D	N/D	22	7	130	7	233	26.2	5.74	-0.785902	-0.701504	-0.711248	-0.59719	-0.590585	-0.600014	-0.682965	-0.664619	-0.791615
0.947416	-0.0435831	0.970242	O96000	TRUE	NADH dehydrogenase [ubiquinone] 1 beta subcomplex subunit 10 OS=Homo sapiens OX=9606	NDUFB10	0.0297577	3.48672	N/D	N/D	51	8	199	8	172	20.8	8.48	1.11176	0.990431	1.07347	1.01039	1.01009	1.02951	1.07031	1.05359	1.06191
1.13089	0.0782606	1.05574	O96005	FALSE	Cleft lip and palate transmembrane protein 1 OS=Homo sapiens OX=9606	CLPTM1	-0.0557444	N/D	N/D	N/D	24	13	318	13	669	76	6.3	0.864592	0.883394	0.915365	0.962298	1.05465	0.948431	0.943206	0.862932	0.991714
1.27637	-0.0830547	0.944057	O96006	FALSE	E3 SUMO-protein ligase ZBED1 OS=Homo sapiens OX=9606	ZBED1	0.0559434	3.77275	N/D	N/D	7	5	70	5	694	78.1	6.1	-1.64518	-1.65423	-1.5932	-1.76045	-1.62554	-1.75943	-1.58578	-1.66799	-1.64614
2.23249	0.160844	1.11794	O96007	FALSE	Molybdopterin synthase catalytic subunit OS=Homo sapiens OX=9606	MOCS2	-0.117941	N/D	N/D	N/D	28	5	137	5	188	20.9	5.44	-0.615398	-0.619848	-0.643089	-0.477248	-0.381595	-0.581268	-0.630282	-0.691561	-0.645107
1.98479	0.111583	1.08041	O96008	FALSE	Mitochondrial import receptor subunit TOM40 homolog OS=Homo sapiens OX=9606	TOMM40	-0.0804132	N/D	N/D	N/D	40	9	352	9	361	37.9	7.25	2.98586	3.0642	2.97647	3.04542	3.12446	3.09369	2.94319	2.93243	2.95547
0.91643	0.0794094	1.05659	O96011	FALSE	Peroxisomal membrane protein 11B OS=Homo sapiens OX=9606	PEX11B	-0.0565854	N/D	N/D	N/D	25	6	132	6	259	28.4	9.85	-0.567902	-0.588783	-0.510725	-0.373302	-0.473268	-0.531088	-0.492793	-0.604273	-0.467295
2.95759	-0.38187	0.767442	O96013	TRUE	Serine/threonine-protein kinase PAK 4 OS=Homo sapiens OX=9606	PAK4	0.232558	4.48149	6.25367	N/D	28	11	143	11	591	64	9.73	-0.468184	-0.376921	-0.413725	-0.893914	-0.847753	-0.899017	-0.697154	-0.455549	-0.578613
1.08316	0.0489084	1.03448	O96017	FALSE	Serine/threonine-protein kinase Chk2 OS=Homo sapiens OX=9606	CHEK2	-0.0344819	N/D	N/D	N/D	16	10	229	10	543	60.9	5.91	0.498878	0.536768	0.478865	0.550231	0.551728	0.486517	0.447536	0.457279	0.464176
2.77932	0.117652	1.08497	O96019	FALSE	Actin-like protein 6A OS=Homo sapiens OX=9606	ACTL6A	-0.0849677	N/D	N/D	N/D	42	13	621	10	429	47.4	5.6	3.17739	3.25169	3.21439	3.31748	3.3436	3.30077	3.21036	3.14395	3.22
0.962243	-0.0742825	0.949814	O96028	TRUE	Histone-lysine N-methyltransferase NSD2 OS=Homo sapiens OX=9606	NSD2	0.0501856	3.72294	N/D	N/D	33	34	604	33	1365	152.2	8.69	1.17192	1.20888	1.20877	1.1992	1.17344	1.06005	1.29868	1.17213	1.2507
0.623383	0.236702	1.1783	O96033	FALSE	Molybdopterin synthase sulfur carrier subunit OS=Homo sapiens OX=9606	MOCS2	-0.178296	N/D	N/D	N/D	22	2	71	2	88	9.7	4.72	-0.965708	-1.06832	-0.882158	-0.892356	-0.853955	-0.818127	-1.01143	-0.919678	-1.7018
0.330198	0.104577	1.07518	P00167	FALSE	Cytochrome b5 OS=Homo sapiens OX=9606	CYB5A	-0.0751788	N/D	N/D	N/D	40	4	159	4	134	15.3	4.96	0.0425758	-0.175335	0.0387402	-0.0976782	-0.171247	0.432251	-0.148049	-0.0241661	-0.0345726
2.41631	0.096642	1.06928	P00338	FALSE	L-lactate dehydrogenase A chain OS=Homo sapiens OX=9606	LDHA	-0.0692817	N/D	N/D	N/D	70	25	4534	24	332	36.7	8.27	7.23988	7.18842	7.13601	7.29983	7.27996	7.29295	7.17751	7.19383	7.22999
2.04817	0.153773	1.11247	P00367	FALSE	Glutamate dehydrogenase 1, mitochondrial OS=Homo sapiens OX=9606	GLUD1	-0.112475	N/D	N/D	N/D	55	26	1445	26	558	61.4	7.8	4.15961	4.16194	4.21543	4.28712	4.24177	4.4025	4.15479	4.06735	4.18104
0.228741	0.0272145	1.01904	P00374	FALSE	Dihydrofolate reductase OS=Homo sapiens OX=9606	DHFR	-0.0190427	N/D	N/D	N/D	46	9	205	9	187	21.4	7.42	1.39904	1.61957	1.55897	1.55677	1.57474	1.56433	1.50742	1.6095	1.53389
1.66282	0.100636	1.07225	P00387	FALSE	NADH-cytochrome b5 reductase 3 OS=Homo sapiens OX=9606	CYB5R3	-0.0722458	N/D	N/D	N/D	47	13	492	13	301	34.2	7.59	2.56168	2.57465	2.63712	2.77354	2.69709	2.64975	2.59489	2.59579	2.67282
1.96092	0.0802954	1.05723	P00390	FALSE	Glutathione reductase, mitochondrial OS=Homo sapiens OX=9606	GSR	-0.0572345	N/D	N/D	N/D	35	13	712	13	522	56.2	8.5	3.51726	3.4968	3.46972	3.54148	3.55781	3.53699	3.46205	3.41864	3.42632
1.33104	-0.32627	0.797596	P00395	FALSE	Cytochrome c oxidase subunit 1 OS=Homo sapiens OX=9606	MT-CO1	0.202404	4.40444	8.13666	N/D	2	1	11	1	513	57	6.7	-4.26436	-4.50107	-4.26628	-4.77063	-4.81079	-4.3101	-4.1797	-4.15844	-4.45558
0.809217	0.119704	1.08651	P00403	FALSE	Cytochrome c oxidase subunit 2 OS=Homo sapiens OX=9606	MT-CO2	-0.0865117	N/D	N/D	N/D	16	3	228	3	227	25.5	4.82	1.02244	1.27654	1.33849	1.4396	1.35014	1.36631	1.34417	1.29063	1.3216
0.496087	-0.139688	0.907715	P00414	FALSE	Cytochrome c oxidase subunit 3 OS=Homo sapiens OX=9606	MT-CO3	0.0922846	4.00718	N/D	N/D	9	2	48	2	261	29.9	7.31	-2.75093	-2.86655	-2.43369	-2.87641	-2.94383	-2.81744	-2.8512	-2.99731	-2.53756
2.73342	0.181016	1.13368	P00441	FALSE	Superoxide dismutase [Cu-Zn] OS=Homo sapiens OX=9606	SOD1	-0.133682	N/D	N/D	N/D	69	8	969	8	154	15.9	6.13	5.86141	5.91059	5.93406	6.1513	6.04852	6.12143	5.96727	5.88147	6.00161
1.92416	0.118956	1.08595	P00491	FALSE	Purine nucleoside phosphorylase OS=Homo sapiens OX=9606	PNP	-0.0859488	N/D	N/D	N/D	64	16	1186	16	289	32.1	6.95	3.97243	3.92076	3.99644	4.13967	4.08701	4.00266	4.00368	3.94389	3.90774
3.77056	0.183669	1.13577	P00492	FALSE	Hypoxanthine-guanine phosphoribosyltransferase OS=Homo sapiens OX=9606	HPRT1	-0.135768	N/D	N/D	N/D	64	10	592	10	218	24.6	6.68	3.20453	3.09742	3.13929	3.31136	3.37209	3.3388	3.17912	3.17663	3.1455
2.78032	0.123787	1.08959	P00505	FALSE	Aspartate aminotransferase, mitochondrial OS=Homo sapiens OX=9606	GOT2	-0.0895913	N/D	N/D	N/D	57	24	1578	24	430	47.5	9.01	5.04789	5.02944	5.03474	5.1358	5.16346	5.09049	4.97468	4.97769	4.97235
0.680334	-0.61418	0.653301	P00519	TRUE	Tyrosine-protein kinase ABL1 OS=Homo sapiens OX=9606	ABL1	0.346699	4.72484	3.60319	N/D	7	6	62	4	1130	122.8	8.66	-3.43575	-3.37101	-3.54468	-4.05993	-4.79764	-3.58372	-2.84248	-4.72816	-3.27543
3.72583	0.090604	1.06482	P00558	FALSE	Phosphoglycerate kinase 1 OS=Homo sapiens OX=9606	PGK1	-0.0648159	N/D	N/D	N/D	74	31	4582	26	417	44.6	8.1	7.18289	7.17689	7.15061	7.24697	7.25259	7.24335	7.15881	7.14796	7.12501
1.37933	0.280729	1.21481	P00734	FALSE	Prothrombin OS=Homo sapiens OX=9606	F2	-0.214809	N/D	N/D	N/D	1	1	29	1	622	70	5.9	-3.30719	-3.10163	-2.88602	-2.85854	-3.02964	-2.81985	-3.1874	-3.38435	-3.23385
3.31884	0.124566	1.09018	P00813	FALSE	Adenosine deaminase OS=Homo sapiens OX=9606	ADA	-0.0901799	N/D	N/D	N/D	78	27	3454	27	363	40.7	5.95	6.2562	6.23043	6.25727	6.3463	6.34301	6.35038	6.22366	6.18972	6.1747
0.243858	-0.0407853	0.972126	P00846	FALSE	ATP synthase subunit a OS=Homo sapiens OX=9606	MT-ATP6	0.0278744	3.45748	N/D	N/D	8	2	107	2	226	24.8	10.1	0.602638	0.687456	0.632662	0.454337	0.57381	0.487928	0.432839	0.462055	0.459211
0.373342	0.0838974	1.05988	P00966	FALSE	Argininosuccinate synthase OS=Homo sapiens OX=9606	ASS1	-0.0598774	N/D	N/D	N/D	4	2	2	2	412	46.5	8.02	-4.17022	-4.27552	-3.96165	-4.02886	-4.04784	-4.19032	-4.00953	-4.33422	-4.28628
0.620403	-0.129728	0.914004	P01023	FALSE	Alpha-2-macroglobulin OS=Homo sapiens OX=9606	A2M	0.0859961	3.97353	N/D	N/D	3	4	41	4	1474	163.2	6.46	-1.86161	-1.55672	-1.63844	-1.92371	-1.67218	-1.89647	-1.8511	-1.53487	-1.76362
0.23185	0.0461774	1.03253	P01106	TRUE	Myc proto-oncogene protein OS=Homo sapiens OX=9606	MYC	-0.0325255	N/D	N/D	N/D	8	3	54	3	439	48.8	5.49	-1.91739	-1.90504	-1.91801	-1.90601	-1.76676	-1.69734	-1.61216	-1.81027	-1.85442
0.0346381	0.00879399	1.00611	P01111	FALSE	GTPase NRas OS=Homo sapiens OX=9606	NRAS	-0.00611414	N/D	N/D	N/D	45	7	265	1	189	21.2	5.17	-1.53056	-1.52124	-1.59938	-1.55476	-1.63147	-1.7479	-1.80855	-1.63469	-1.82661
0.310045	0.0701	1.04979	P01112	FALSE	GTPase HRas OS=Homo sapiens OX=9606	HRAS	-0.0497894	N/D	N/D	N/D	40	6	177	1	189	21.3	5.31	-3.97259	-4.13398	-4.11234	-4.01454	-3.8625	-3.90514	-3.89559	-4.11774	-3.75273
1.14732	0.101919	1.0732	P01116	FALSE	GTPase KRas OS=Homo sapiens OX=9606	KRAS	-0.0731998	N/D	N/D	N/D	38	5	233	2	189	21.6	6.77	-1.23129	-1.20827	-1.11408	-0.994376	-1.1612	-1.1252	-1.22655	-1.25873	-1.13414
0.465023	-0.120524	0.919854	P01130	FALSE	Low-density lipoprotein receptor OS=Homo sapiens OX=9606	LDLR	0.0801463	3.94016	N/D	N/D	21	13	82	12	860	95.3	5.05	-0.85087	-1.31043	-1.21644	-1.39999	-1.2899	-1.31573	-1.32883	-1.18207	-1.39946
2.18205	-0.508469	0.702968	P01137	FALSE	Transforming growth factor beta-1 proprotein OS=Homo sapiens OX=9606	TGFB1	0.297032	4.62587	4.34442	N/D	3	1	11	1	390	44.3	8.53	-4.99656	-5.19431	-4.96707	-5.18755	-5.66335	-5.75165	-5.10689	-4.86725	-5.02221
0.284237	0.0565569	1.03998	P01210	FALSE	Proenkephalin-A OS=Homo sapiens OX=9606	PENK	-0.0399808	N/D	N/D	N/D	3	2	58	2	267	30.8	5.53	0.17993	0.105165	-0.02878	0.0618887	0.0146666	0.0569973	-0.21009	-0.0309277	-0.087534
0.0126944	-0.00957791	0.993383	P01733	FALSE	T cell receptor beta variable 12-3 OS=Homo sapiens OX=9606	TRBV12-3	0.00661691	2.82354	N/D	N/D	30	3	119	3	115	13	6.27	-0.8599	-0.142302	-0.0603828	-0.695067	-0.195584	-0.689018	-0.867099	-0.308472	-0.863718
2.25921	0.10335	1.07427	P01850	FALSE	T cell receptor beta constant 1 OS=Homo sapiens OX=9606	TRBC1	-0.0742652	N/D	N/D	N/D	44	5	274	5	176	19.8	6.18	1.64747	1.61998	1.60631	1.6766	1.71994	1.78467	1.58618	1.62183	1.66055
1.92924	0.198182	1.14725	P01889	TRUE	HLA class I histocompatibility antigen, B alpha chain OS=Homo sapiens OX=9606	HLA-B	-0.147252	N/D	N/D	N/D	34	9	413	3	362	40.4	5.85	-1.38614	-1.29283	-1.19505	-0.990159	-1.22034	-1.12115	-1.30056	-1.35361	-1.3242
0.5629	0.129588	1.09398	P01893	TRUE	Putative HLA class I histocompatibility antigen, alpha chain H OS=Homo sapiens OX=9606	HLA-H	-0.093981	N/D	N/D	N/D	26	6	407	1	362	40.9	6.3	-3.76033	-3.42654	-3.64786	-3.49469	-3.33503	-3.51497	-3.76742	-3.49491	-3.36987
0.242963	0.0362007	1.02541	P02649	FALSE	Apolipoprotein E OS=Homo sapiens OX=9606	APOE	-0.0254099	N/D	N/D	N/D	3	1	12	1	317	36.1	5.73	-2.79037	-2.68301	-2.74827	-2.62537	-2.84945	-2.75046	-2.77427	-2.7649	-2.90693
2.33102	-0.923706	0.527153	P02679	FALSE	Fibrinogen gamma chain OS=Homo sapiens OX=9606	FGG	0.472847	4.95278	2.64462	N/D	7	2	4	2	453	51.5	5.62	-3.89873	-4.32352	-4.12764	-5.22336	-4.39817	-5.35685	-3.87587	-4.23777	-3.95099
0.121369	-0.0316892	0.978274	P02686	FALSE	Myelin basic protein OS=Homo sapiens OX=9606	MBP	0.0217258	3.34651	N/D	N/D	22	4	72	4	304	33.1	9.79	-1.80382	-1.53853	-1.7345	-1.69366	-1.77157	-1.75985	-1.54296	-1.96213	-1.67808
3.58877	0.19794	1.14706	P02751	TRUE	Fibronectin OS=Homo sapiens OX=9606	FN1	-0.147059	N/D	N/D	N/D	6	11	86	11	2477	272.2	5.5	-0.603493	-0.721832	-0.678574	-0.507787	-0.419845	-0.48938	-0.689403	-0.663252	-0.66511
1.5205	0.14533	1.10598	P02765	TRUE	Alpha-2-HS-glycoprotein OS=Homo sapiens OX=9606	AHSG	-0.105984	N/D	N/D	N/D	5	3	138	3	367	39.3	5.72	0.155342	0.123425	0.0630264	0.285617	0.167567	0.306534	0.208007	0.110086	-0.0124302
3.05981	0.0659798	1.0468	P02786	FALSE	Transferrin receptor protein 1 OS=Homo sapiens OX=9606	TFRC	-0.0467956	N/D	N/D	N/D	39	28	1825	28	760	84.8	6.61	4.90271	4.88766	4.89706	4.97441	4.96071	4.97529	4.92017	4.88385	4.93349
1.24912	0.148437	1.10837	P02788	FALSE	Lactotransferrin OS=Homo sapiens OX=9606	LTF	-0.108368	N/D	N/D	N/D	5	3	131	3	710	78.1	8.12	-0.321428	-0.272415	-0.127632	-0.0620909	-0.0483446	-0.126789	-0.128942	-0.149292	-0.365364
0.146643	-0.048697	0.966809	P02792	FALSE	Ferritin light chain OS=Homo sapiens OX=9606	FTL	0.0331909	3.53568	N/D	N/D	9	2	30	2	175	20	5.78	-3.2983	-3.52417	-3.2924	-3.28138	-3.38963	-3.45886	-3.45822	-3.4413	-2.95318
5.41413	0.305833	1.23613	P02794	FALSE	Ferritin heavy chain OS=Homo sapiens OX=9606	FTH1	-0.236132	N/D	N/D	N/D	44	9	224	9	183	21.2	5.55	0.908356	0.892761	0.871992	1.21777	1.15559	1.21902	0.907832	0.838739	0.930086
0.179513	-0.0727092	0.950851	P03897	FALSE	NADH-ubiquinone oxidoreductase chain 3 OS=Homo sapiens OX=9606	MT-ND3	0.0491493	3.7134	N/D	N/D	13	1	20	1	115	13.2	4.44	-3.22182	-2.89475	-3.14102	-3.53513	-3.35633	-3.13577	-3.40814	-3.40463	-3.54784
0.335482	-0.142645	0.905857	P03905	FALSE	NADH-ubiquinone oxidoreductase chain 4 OS=Homo sapiens OX=9606	MT-ND4	0.0941434	4.01673	N/D	N/D	4	2	12	2	459	51.5	9.35	-4.62983	-4.40618	-4.19323	-4.70715	-4.23689	-5.00696	-4.63945	-4.5042	-4.67325
0.0051121	-0.00276391	0.998086	P03923	FALSE	NADH-ubiquinone oxidoreductase chain 6 OS=Homo sapiens OX=9606	MT-ND6	0.00191396	2.28276	N/D	N/D	8	1	12	1	174	18.6	4.22	-5.18279	-4.83144	-4.65579	-4.50835	-4.726	-5.0528	-4.5128	-4.83982	-4.53505
3.19372	0.82815	1.77541	P03928	FALSE	ATP synthase protein 8 OS=Homo sapiens OX=9606	MT-ATP8	-0.775407	N/D	N/D	N/D	53	3	159	3	68	8	9.91	-0.000839233	-0.352415	-0.185457	0.403644	0.52773	0.454779	-0.507051	-0.559887	-0.590946
0.185289	0.0654359	1.0464	P04035	FALSE	3-hydroxy-3-methylglutaryl-coenzyme A reductase OS=Homo sapiens OX=9606	HMGCR	-0.046401	N/D	N/D	N/D	10	8	32	8	888	97.4	6.74	-2.06791	-2.08987	-2.28138	-2.34642	-2.11272	-2.20332	-2.59117	-2.17348	-2.51371
4.09243	-0.307987	0.807768	P04049	FALSE	RAF proto-oncogene serine/threonine-protein kinase OS=Homo sapiens OX=9606	RAF1	0.192232	4.37654	9.11331	N/D	29	15	299	9	648	73	9.2	-0.776447	-0.750698	-0.741749	-1.14131	-1.1376	-1.05483	-0.823852	-0.851566	-0.87524
0.847573	-0.115702	0.922933	P04053	FALSE	DNA nucleotidylexotransferase OS=Homo sapiens OX=9606	DNTT	0.077067	3.9217	N/D	N/D	19	9	105	9	509	58.5	8.43	-0.810137	-0.564455	-0.67968	-0.664874	-0.768693	-0.878984	-0.701262	-0.560511	-0.614845
2.08283	-0.279197	0.824049	P04066	TRUE	Tissue alpha-L-fucosidase OS=Homo sapiens OX=9606	FUCA1	0.175951	4.32944	11.3809	N/D	3	1	1	1	466	53.7	6.84	-4.77003	-4.90501	-4.61815	-4.99674	-5.18973	-5.08082	-4.7973	-4.83512	-4.93378
2.80343	0.145415	1.10605	P04075	FALSE	Fructose-bisphosphate aldolase A OS=Homo sapiens OX=9606	ALDOA	-0.106049	N/D	N/D	N/D	80	30	3810	26	364	39.4	8.09	7.28616	7.26574	7.31587	7.46696	7.35381	7.40968	7.24008	7.22326	7.25728
5.85319	0.314891	1.24392	P04080	FALSE	Cystatin-B OS=Homo sapiens OX=9606	CSTB	-0.243918	N/D	N/D	N/D	80	6	377	6	98	11.1	7.56	3.25373	3.30773	3.28802	3.63144	3.59998	3.61732	3.30054	3.30036	3.35776
3.26401	0.164176	1.12053	P04083	FALSE	Annexin A1 OS=Homo sapiens OX=9606	ANXA1	-0.120526	N/D	N/D	N/D	60	19	969	19	346	38.7	7.02	4.15844	4.14083	4.16709	4.39016	4.34069	4.32854	4.25118	4.20389	4.2123
1.0186	-0.188534	0.877497	P04114	FALSE	Apolipoprotein B-100 OS=Homo sapiens OX=9606	APOB	0.122503	4.1449	118.479	N/D	2	8	127	7	4563	515.3	7.05	-1.38191	-1.30616	-1.34067	-1.57747	-1.54907	-1.57914	-1.57061	-1.54947	-1.13131
0.331234	-0.0373168	0.974466	P04150	FALSE	Glucocorticoid receptor OS=Homo sapiens OX=9606	NR3C1	0.0255344	3.41836	N/D	N/D	8	5	64	5	777	85.6	6.38	-2.69598	-2.73813	-2.72047	-2.80607	-2.7731	-2.85653	-2.76645	-2.90272	-2.82375
0.184357	0.0461736	1.03252	P04179	FALSE	Superoxide dismutase [Mn], mitochondrial OS=Homo sapiens OX=9606	SOD2	-0.0325228	N/D	N/D	N/D	51	10	490	10	222	24.7	8.25	1.17791	1.58615	1.23658	1.52674	1.41551	1.40543	1.45187	1.47208	1.49371
3.8413	0.314287	1.2434	P04181	FALSE	Ornithine aminotransferase, mitochondrial OS=Homo sapiens OX=9606	OAT	-0.243397	N/D	N/D	N/D	26	8	223	8	439	48.5	7.03	1.00197	0.98966	0.880362	1.25078	1.23101	1.2112	0.868192	0.828918	0.931147
1.37014	0.194837	1.14459	P04183	TRUE	Thymidine kinase, cytosolic OS=Homo sapiens OX=9606	TK1	-0.144595	N/D	N/D	N/D	9	2	26	2	234	25.5	8.51	-3.49274	-3.28571	-3.49918	-3.07985	-3.37467	-3.24191	-3.52042	-3.40434	-3.35947
3.27131	0.192584	1.14281	P04216	FALSE	Thy-1 membrane glycoprotein OS=Homo sapiens OX=9606	THY1	-0.142809	N/D	N/D	N/D	25	4	201	4	161	17.9	8.73	0.120956	0.138456	0.200903	0.39158	0.34525	0.358423	0.2033	0.125265	0.246122
4.03078	-0.201065	0.869908	P04234	FALSE	T-cell surface glycoprotein CD3 delta chain OS=Homo sapiens OX=9606	CD3D	0.130092	4.17478	48.7723	N/D	33	7	253	7	171	18.9	5.54	1.7353	1.74321	1.81668	1.55789	1.55817	1.53729	1.70822	1.72209	1.78758
0.314501	0.0224519	1.01568	P04350	FALSE	Tubulin beta-4A chain OS=Homo sapiens OX=9606	TUBB4A	-0.0156842	N/D	N/D	N/D	66	24	9516	3	444	49.6	4.88	-0.551779	-0.619188	-0.547508	-0.565299	-0.607955	-0.555237	-0.611756	-0.675114	-0.586348
3.40403	0.106552	1.07665	P04406	FALSE	Glyceraldehyde-3-phosphate dehydrogenase OS=Homo sapiens OX=9606	GAPDH	-0.0766517	N/D	N/D	N/D	74	20	8763	20	335	36	8.46	9.26283	9.1952	9.22357	9.34901	9.31441	9.31548	9.2231	9.19304	9.22077
0.0792921	0.0916719	1.0656	P04424	FALSE	Argininosuccinate lyase OS=Homo sapiens OX=9606	ASL	-0.0656044	N/D	N/D	N/D	5	2	9	2	464	51.6	6.48	-5.90351	-4.75057	-4.43484	-5.53784	-5.62783	-4.60155	-5.65106	-5.59406	-5.75045
0.411709	0.0513457	1.03623	P04439	TRUE	HLA class I histocompatibility antigen, A alpha chain OS=Homo sapiens OX=9606	HLA-A	-0.036231	N/D	N/D	N/D	55	19	764	13	365	40.8	6	1.7469	1.82023	1.83709	1.8272	1.96325	1.80688	1.71769	1.93397	1.83071
0.79155	0.0946317	1.06779	P04632	FALSE	Calpain small subunit 1 OS=Homo sapiens OX=9606	CAPNS1	-0.0677928	N/D	N/D	N/D	52	9	263	9	268	28.3	5.2	1.56763	1.46956	1.34862	1.64083	1.5523	1.62081	1.51987	1.63533	1.51907
1.20894	0.0501501	1.03537	P04818	FALSE	Thymidylate synthase OS=Homo sapiens OX=9606	TYMS	-0.0353726	N/D	N/D	N/D	52	15	928	15	313	35.7	7.01	3.92206	3.97812	3.98649	4.02946	3.96826	4.02795	3.98903	3.92355	3.95119
1.38482	0.0494628	1.03488	P04843	FALSE	Dolichyl-diphosphooligosaccharide--protein glycosyltransferase subunit 1 OS=Homo sapiens OX=9606	RPN1	-0.0348795	N/D	N/D	N/D	53	28	1342	28	607	68.5	6.38	4.28553	4.27463	4.3288	4.36125	4.35225	4.34491	4.35662	4.27686	4.29761
0.822619	0.038534	1.02707	P04844	FALSE	Dolichyl-diphosphooligosaccharide--protein glycosyltransferase subunit 2 OS=Homo sapiens OX=9606	RPN2	-0.0270696	N/D	N/D	N/D	32	15	677	15	631	69.2	5.69	4.14528	4.12124	4.04657	4.1588	4.13921	4.10232	4.07022	4.08455	4.10161
0.20182	0.0319854	1.02242	P04899	FALSE	Guanine nucleotide-binding protein G(i) subunit alpha-2 OS=Homo sapiens OX=9606	GNAI2	-0.0224182	N/D	N/D	N/D	47	14	779	9	355	40.4	5.54	2.56582	2.45849	2.5014	2.47542	2.5236	2.38206	2.33758	2.33154	2.3754
0.878323	-0.692852	0.61863	P04920	TRUE	Anion exchange protein 2 OS=Homo sapiens OX=9606	SLC4A2	0.38137	4.78992	3.24988	N/D	4	2	8	2	1241	136.9	6.29	-3.70413	-3.93373	-3.59603	-5.04694	-4.76148	-4.44357	-4.19344	-3.61136	-5.30818
0.0885703	0.0286047	1.02003	P04921	FALSE	Glycophorin-C OS=Homo sapiens OX=9606	GYPC	-0.0200251	N/D	N/D	N/D	21	2	83	2	128	13.8	4.84	-1.64733	-1.25424	-1.42902	-1.28075	-1.21116	-1.44913	-1.14745	-1.20723	-1.36845
0.0585684	-0.00374556	0.997407	P05023	TRUE	Sodium/potassium-transporting ATPase subunit alpha-1 OS=Homo sapiens OX=9606	ATP1A1	0.00259285	2.41491	N/D	N/D	38	40	1685	28	1023	112.8	5.49	3.73252	3.76573	3.74957	3.74313	3.74801	3.77918	3.82917	3.75362	3.73251
3.0391	0.242131	1.18274	P05107	FALSE	Integrin beta-2 OS=Homo sapiens OX=9606	ITGB2	-0.182738	N/D	N/D	N/D	49	32	913	32	769	84.7	6.95	2.80054	2.83311	2.81936	3.14094	3.1228	3.11051	2.94543	2.92756	2.96971
2.36977	0.529712	1.44364	P05108	FALSE	Cholesterol side-chain cleavage enzyme, mitochondrial OS=Homo sapiens OX=9606	CYP11A1	-0.443641	N/D	N/D	N/D	3	1	5	1	521	60.1	8.84	-1.6646	-1.45401	-1.66868	-0.925229	-0.868087	-0.863983	-1.23926	-1.23124	-1.23509
0.652453	0.223888	1.16788	P05109	FALSE	Protein S100-A8 OS=Homo sapiens OX=9606	S100A8	-0.167876	N/D	N/D	N/D	24	2	7	2	93	10.8	7.03	-2.49592	-2.7352	-2.47991	-2.50881	-2.762	-2.4087	-2.91292	-3.01999	-3.05841
0.127674	0.0523712	1.03697	P05114	FALSE	Non-histone chromosomal protein HMG-14 OS=Homo sapiens OX=9606	HMGN1	-0.0369679	N/D	N/D	N/D	47	6	161	6	100	10.7	9.6	-0.239094	0.0866528	0.246769	-0.0114069	0.311517	-0.12027	-0.107759	0.249363	-0.190479
0.248991	-0.0561999	0.961794	P05120	FALSE	Plasminogen activator inhibitor 2 OS=Homo sapiens OX=9606	SERPINB2	0.0382058	3.59905	N/D	N/D	18	7	184	7	415	46.6	5.63	-1.0215	-1.18746	-1.29378	-1.15704	-1.31539	-1.42745	-1.26205	-1.29417	-1.40359
0.693004	0.0418477	1.02943	P05141	FALSE	ADP/ATP translocase 2 OS=Homo sapiens OX=9606	SLC25A5	-0.0294314	N/D	N/D	N/D	50	19	1996	7	298	32.8	9.69	3.78444	3.82614	3.77813	3.85547	3.86857	3.84092	3.86318	3.753	3.87393
0.863093	0.0540821	1.0382	P05161	FALSE	Ubiquitin-like protein ISG15 OS=Homo sapiens OX=9606	ISG15	-0.0381983	N/D	N/D	N/D	36	5	172	5	165	17.9	7.44	1.95506	1.97742	2.03604	2.12342	2.01133	2.00665	1.99441	2.0309	1.96448
0.156561	-0.0431228	0.970552	P05165	FALSE	Propionyl-CoA carboxylase alpha chain, mitochondrial OS=Homo sapiens OX=9606	PCCA	0.0294481	3.48204	N/D	N/D	9	5	51	5	728	80	7.52	-0.496233	-0.584536	-0.67161	-0.796847	-0.777753	-0.760794	-0.943433	-0.871847	-0.844393
0.86435	0.282277	1.21611	P05166	FALSE	Propionyl-CoA carboxylase beta chain, mitochondrial OS=Homo sapiens OX=9606	PCCB	-0.216113	N/D	N/D	N/D	22	10	149	10	539	58.2	7.64	-0.896578	-1.55586	-1.45808	-1.20393	-0.99191	-0.951595	-1.6025	-1.31365	-1.16186
0.57687	0.0321078	1.0225	P05198	FALSE	Eukaryotic translation initiation factor 2 subunit 1 OS=Homo sapiens OX=9606	EIF2S1	-0.022505	N/D	N/D	N/D	73	25	1489	25	315	36.1	5.08	4.48872	4.49277	4.43241	4.5268	4.45837	4.45982	4.41838	4.40491	4.46014
4.04678	2.04394	4.12371	P05204	TRUE	Non-histone chromosomal protein HMG-17 OS=Homo sapiens OX=9606	HMGN2	-3.12371	N/D	N/D	N/D	30	2	13	2	90	9.4	9.99	-8.14993	-7.52147	-6.94737	-5.34112	-5.61293	-5.73569	-7.7618	-7.45005	-7.8125
1.06817	0.735729	1.66524	P05386	FALSE	60S acidic ribosomal protein P1 OS=Homo sapiens OX=9606	RPLP1	-0.665239	N/D	N/D	N/D	53	3	134	2	114	11.5	4.32	-1.41574	-1.54387	-1.7078	-1.1458	-1.496	-0.944149	-1.55771	-2.61666	-2.74449
0.112543	-0.00846847	0.994147	P05387	FALSE	60S acidic ribosomal protein P2 OS=Homo sapiens OX=9606	RPLP2	0.0058527	2.76991	N/D	N/D	89	9	1026	8	115	11.7	4.54	5.73428	5.72132	5.74834	5.7223	5.77566	5.73693	5.80261	5.81016	5.70388
1.0527	0.0763679	1.05436	P05388	FALSE	60S acidic ribosomal protein P0 OS=Homo sapiens OX=9606	RPLP0	-0.0543602	N/D	N/D	N/D	46	12	1611	12	317	34.3	5.97	5.80791	5.68175	5.73162	5.79184	5.75491	5.77479	5.66993	5.62799	5.66569
1.45588	-0.115619	0.922986	P05423	TRUE	DNA-directed RNA polymerase III subunit RPC4 OS=Homo sapiens OX=9606	POLR3D	0.0770137	3.92137	N/D	N/D	29	9	135	9	398	44.4	6.98	-0.528778	-0.437473	-0.341864	-0.500825	-0.600455	-0.490957	-0.39149	-0.389824	-0.401333
0.0960685	0.00632683	1.0044	P05455	TRUE	Lupus La protein OS=Homo sapiens OX=9606	SSB	-0.00439506	N/D	N/D	N/D	48	24	1226	24	408	46.8	7.12	4.44649	4.38234	4.40966	4.41733	4.40184	4.39455	4.37143	4.34299	4.43657
1.07326	0.0514143	1.03628	P05556	FALSE	Integrin beta-1 OS=Homo sapiens OX=9606	ITGB1	-0.0362803	N/D	N/D	N/D	38	26	791	26	798	88.4	5.39	2.49132	2.44153	2.46783	2.57675	2.50172	2.56027	2.52357	2.51422	2.53054
0.497291	0.0477335	1.03364	P05771	FALSE	Protein kinase C beta type OS=Homo sapiens OX=9606	PRKCB	-0.0336398	N/D	N/D	N/D	20	14	517	7	671	76.8	7.01	-0.611567	-0.628187	-0.729418	-0.676162	-0.577127	-0.69009	-0.767028	-0.742344	-0.694614
0.376312	0.17475	1.12877	P06126	FALSE	T-cell surface glycoprotein CD1a OS=Homo sapiens OX=9606	CD1A	-0.128769	N/D	N/D	N/D	10	2	22	1	327	37.1	6.79	-3.4985	-3.58734	-3.39218	-3.58181	-3.19711	-3.49613	-4.1695	-3.69139	-3.25971
0.282081	-0.0354568	0.975723	P06127	TRUE	T-cell surface glycoprotein CD5 OS=Homo sapiens OX=9606	CD5	0.0242772	3.39587	N/D	N/D	34	13	253	13	495	54.5	8.21	0.808304	0.676615	0.770897	0.731395	0.805614	0.80192	0.842471	0.90728	0.885031
0.224373	0.042961	1.03023	P06132	FALSE	Uroporphyrinogen decarboxylase OS=Homo sapiens OX=9606	UROD	-0.0302261	N/D	N/D	N/D	20	8	350	8	367	40.8	6.14	1.30343	0.998459	1.04006	1.10869	1.06639	1.09035	0.964995	0.975784	0.990377
2.77865	0.110021	1.07924	P06239	FALSE	Tyrosine-protein kinase Lck OS=Homo sapiens OX=9606	LCK	-0.079244	N/D	N/D	N/D	58	19	964	17	509	58	5.36	3.3614	3.38923	3.42335	3.49068	3.50017	3.47353	3.4039	3.31982	3.37095
0.464356	0.064418	1.04566	P06241	FALSE	Tyrosine-protein kinase Fyn OS=Homo sapiens OX=9606	FYN	-0.045663	N/D	N/D	N/D	15	8	362	4	537	60.7	6.67	-1.54901	-1.64747	-1.66348	-1.58185	-1.52689	-1.60105	-1.80932	-1.62157	-1.51523
0.928175	0.139605	1.1016	P06280	FALSE	Alpha-galactosidase A OS=Homo sapiens OX=9606	GLA	-0.101603	N/D	N/D	N/D	23	9	220	9	429	48.7	5.6	-0.525602	-0.428171	-0.240694	-0.258018	-0.192824	-0.32148	-0.54285	-0.281578	-0.363377
0.372037	0.107113	1.07707	P06396	FALSE	Gelsolin OS=Homo sapiens OX=9606	GSN	-0.0770708	N/D	N/D	N/D	1	1	5	1	782	85.6	6.28	-5.09883	-4.53056	-4.73114	-4.79105	-4.6403	-4.61423	-4.63343	-4.90001	-4.83987
7.92321	-0.507747	0.70332	P06400	TRUE	Retinoblastoma-associated protein OS=Homo sapiens OX=9606	RB1	0.29668	4.62513	4.35114	4.62513	43	38	1491	38	928	106.1	7.94	4.31231	4.34724	4.30681	3.84993	3.82992	3.78426	4.35437	4.3282	4.32575
0.472389	0.0702351	1.04989	P06454	FALSE	Prothymosin alpha OS=Homo sapiens OX=9606	PTMA	-0.0498878	N/D	N/D	N/D	37	7	1420	7	111	12.2	3.78	5.05636	5.20533	5.19469	5.11831	5.18976	5.10276	4.94974	5.02554	4.96858
1.75612	0.0731025	1.05198	P06493	FALSE	Cyclin-dependent kinase 1 OS=Homo sapiens OX=9606	CDK1	-0.0519765	N/D	N/D	N/D	69	17	1255	15	297	34.1	8.4	3.93052	3.98362	3.94938	4.02601	4.04006	3.97194	3.96282	3.91707	3.894
3.2609	0.0949372	1.06802	P06576	FALSE	ATP synthase subunit beta, mitochondrial OS=Homo sapiens OX=9606	ATP5F1B	-0.0680189	N/D	N/D	N/D	66	24	2901	24	529	56.5	5.4	6.60912	6.61989	6.56472	6.6793	6.66803	6.68676	6.58215	6.55782	6.56488
4.95674	-0.437774	0.738273	P06729	TRUE	T-cell surface antigen CD2 OS=Homo sapiens OX=9606	CD2	0.261727	4.54963	5.17937	N/D	36	12	296	12	351	39.4	9.63	1.27625	1.28284	1.42408	0.862021	0.85753	0.886045	1.30905	1.31715	1.22846
5.63237	-0.179222	0.883179	P06730	FALSE	Eukaryotic translation initiation factor 4E OS=Homo sapiens OX=9606	EIF4E	0.116821	4.12147	N/D	N/D	47	10	572	10	217	25.1	6.15	2.93049	2.9744	2.92787	2.73769	2.77576	2.77247	2.93616	2.93989	2.93836
4.09494	0.0764407	1.05441	P06733	FALSE	Alpha-enolase OS=Homo sapiens OX=9606	ENO1	-0.0544134	N/D	N/D	N/D	82	31	6182	26	434	47.1	7.39	8.03012	7.99085	8.01474	8.08731	8.09459	8.07998	8.02428	7.99958	8.00555
0.177994	0.0973112	1.06978	P06737	FALSE	Glycogen phosphorylase, liver form OS=Homo sapiens OX=9606	PYGL	-0.0697778	N/D	N/D	N/D	7	6	146	1	847	97.1	7.17	-3.41604	-3.46585	-3.37902	-2.87138	-3.01792	-3.12795	-2.76122	-2.83176	-2.7645
1.15943	0.0592796	1.04195	P06744	FALSE	Glucose-6-phosphate isomerase OS=Homo sapiens OX=9606	GPI	-0.0419453	N/D	N/D	N/D	60	27	2290	27	558	63.1	8.32	5.72726	5.80343	5.83035	5.81648	5.86138	5.80544	5.74512	5.77625	5.72851
0.736392	-0.0402284	0.972501	P06748	FALSE	Nucleophosmin OS=Homo sapiens OX=9606	NPM1	0.027499	3.45143	N/D	N/D	72	16	2803	16	294	32.6	4.78	6.63385	6.66886	6.70374	6.63206	6.65406	6.56871	6.67621	6.60089	6.66747
0.379625	0.0225835	1.01578	P06753	FALSE	Tropomyosin alpha-3 chain OS=Homo sapiens OX=9606	TPM3	-0.0157768	N/D	N/D	N/D	39	16	1277	7	285	32.9	4.72	3.62118	3.54652	3.61232	3.66413	3.63695	3.59051	3.62539	3.58784	3.65444
3.66144	0.272284	1.20772	P06865	FALSE	Beta-hexosaminidase subunit alpha OS=Homo sapiens OX=9606	HEXA	-0.207719	N/D	N/D	N/D	21	11	352	10	529	60.7	5.16	0.550873	0.591702	0.532843	0.768521	0.770143	0.788282	0.469218	0.422781	0.45277
0.573987	0.0792397	1.05646	P07099	FALSE	Epoxide hydrolase 1 OS=Homo sapiens OX=9606	EPHX1	-0.0564611	N/D	N/D	N/D	16	8	117	8	455	52.9	7.25	1.95004	1.92264	1.90215	1.85234	1.9172	1.98619	1.8148	1.74163	1.70478
3.25451	0.143779	1.10479	P07108	FALSE	Acyl-CoA-binding protein OS=Homo sapiens OX=9606	DBI	-0.104795	N/D	N/D	N/D	64	5	353	5	87	10	6.57	3.93681	3.9197	3.97941	4.08169	4.08972	4.0892	3.90071	3.91777	4.00413
2.10209	0.0771852	1.05496	P07195	FALSE	L-lactate dehydrogenase B chain OS=Homo sapiens OX=9606	LDHB	-0.0549577	N/D	N/D	N/D	52	20	4847	19	334	36.6	6.05	7.25798	7.29528	7.27638	7.35744	7.32149	7.30675	7.24026	7.21608	7.22226
0.275854	0.0734941	1.05226	P07199	FALSE	Major centromere autoantigen B OS=Homo sapiens OX=9606	CENPB	-0.0522621	N/D	N/D	N/D	7	3	21	3	599	65.1	4.55	-2.77754	-3.18151	-3.06574	-2.99853	-3.04396	-2.97061	-3.29923	-2.97097	-3.17217
0.231386	0.0449411	1.03164	P07203	FALSE	Glutathione peroxidase 1 OS=Homo sapiens OX=9606	GPX1	-0.0316411	N/D	N/D	N/D	33	6	139	6	203	22.1	6.55	-0.517447	-0.377964	-0.175692	-0.407411	-0.301316	-0.3365	-0.392261	-0.526936	-0.369802
1.14481	0.152267	1.11131	P07205	FALSE	Phosphoglycerate kinase 2 OS=Homo sapiens OX=9606	PGK2	-0.111315	N/D	N/D	N/D	20	7	933	2	417	44.8	8.54	3.24323	3.29382	3.24424	3.35695	3.27414	3.29776	3.09695	3.04653	3.0193
3.02309	0.0805926	1.05745	P07237	FALSE	Protein disulfide-isomerase OS=Homo sapiens OX=9606	P4HB	-0.0574523	N/D	N/D	N/D	59	31	1764	31	508	57.1	4.87	5.1196	5.10355	5.08344	5.19705	5.16447	5.18051	5.11192	5.06319	5.11881
0.925387	0.0487332	1.03436	P07311	FALSE	Acylphosphatase-1 OS=Homo sapiens OX=9606	ACYP1	-0.0343563	N/D	N/D	N/D	45	5	291	5	99	11.3	9.31	0.734186	0.667835	0.654692	0.705379	0.787345	0.763874	0.741393	0.691269	0.731421
1.92086	0.0608706	1.0431	P07339	FALSE	Cathepsin D OS=Homo sapiens OX=9606	CTSD	-0.0430951	N/D	N/D	N/D	27	10	526	10	412	44.5	6.54	3.12031	3.096	3.10785	3.13776	3.20025	3.16838	3.08825	3.14723	3.08793
3.52118	0.154033	1.11268	P07355	FALSE	Annexin A2 OS=Homo sapiens OX=9606	ANXA2	-0.112675	N/D	N/D	N/D	37	14	457	14	339	38.6	7.75	0.926451	0.895678	0.879028	1.03444	1.06952	1.07657	0.970775	0.886068	0.878862
1.37125	0.061652	1.04366	P07384	FALSE	Calpain-1 catalytic subunit OS=Homo sapiens OX=9606	CAPN1	-0.0436602	N/D	N/D	N/D	32	27	998	27	714	81.8	5.67	2.80784	2.88301	2.84522	2.90815	2.89978	2.86461	2.85499	2.80917	2.77493
1.27456	0.0612645	1.04338	P07437	FALSE	Tubulin beta chain OS=Homo sapiens OX=9606	TUBB	-0.0433799	N/D	N/D	N/D	74	28	12915	4	444	49.6	4.89	6.64438	6.60745	6.59391	6.74674	6.6622	6.62611	6.61361	6.60366	6.6395
0.282327	-0.0162263	0.988816	P07602	FALSE	Prosaposin OS=Homo sapiens OX=9606	PSAP	0.0111842	3.05349	N/D	N/D	38	18	888	18	524	58.1	5.17	4.0658	4.05908	4.07795	4.01879	4.04214	4.01089	3.96895	4.0371	4.03214
2.78751	0.0993365	1.07128	P07686	FALSE	Beta-hexosaminidase subunit beta OS=Homo sapiens OX=9606	HEXB	-0.0712806	N/D	N/D	N/D	29	16	551	15	556	63.1	6.76	1.41562	1.47744	1.4859	1.57223	1.56498	1.51726	1.45317	1.45511	1.42567
2.88732	0.0725484	1.05157	P07737	FALSE	Profilin-1 OS=Homo sapiens OX=9606	PFN1	-0.0515726	N/D	N/D	N/D	98	15	5597	15	140	15	8.27	7.86021	7.88561	7.89624	7.96072	7.97264	7.96103	7.92546	7.87758	7.9084
0.704114	0.45779	1.37344	P07738	FALSE	Bisphosphoglycerate mutase OS=Homo sapiens OX=9606	BPGM	-0.373437	N/D	N/D	N/D	6	2	9	2	259	30	6.54	-5.3381	-3.89986	-4.06417	-3.78669	-3.70405	-4.10556	-4.36578	-4.0653	-4.20613
0.480904	0.0347587	1.02439	P07741	FALSE	Adenine phosphoribosyltransferase OS=Homo sapiens OX=9606	APRT	-0.0243855	N/D	N/D	N/D	51	9	436	9	180	19.6	6.02	4.05205	4.08767	4.10632	4.05739	4.19288	4.10289	4.10345	4.11808	4.0302
1.5307	0.0484687	1.03417	P07766	FALSE	T-cell surface glycoprotein CD3 epsilon chain OS=Homo sapiens OX=9606	CD3E	-0.0341667	N/D	N/D	N/D	50	8	396	8	207	23.1	6.76	2.29503	2.25051	2.22991	2.33085	2.31238	2.27437	2.25418	2.24102	2.27373
3.63645	0.0695135	1.04936	P07814	FALSE	Bifunctional glutamate/proline--tRNA ligase OS=Homo sapiens OX=9606	EPRS1	-0.0493627	N/D	N/D	N/D	51	64	3117	63	1512	170.5	7.33	5.29371	5.28579	5.31145	5.37496	5.37282	5.34323	5.28676	5.30717	5.28008
1.79001	0.137672	1.10013	P07858	FALSE	Cathepsin B OS=Homo sapiens OX=9606	CTSB	-0.100128	N/D	N/D	N/D	25	7	212	7	339	37.8	6.3	-0.272484	-0.220907	-0.228813	-0.108596	-0.13613	-0.138895	-0.29433	-0.390766	-0.185974
1.66147	0.0639739	1.04534	P07900	FALSE	Heat shock protein HSP 90-alpha OS=Homo sapiens OX=9606	HSP90AA1	-0.0453412	N/D	N/D	N/D	66	57	13768	33	732	84.6	5.02	7.41039	7.42841	7.44311	7.43671	7.47049	7.48648	7.35572	7.37867	7.38722
0.352994	-0.488622	0.712705	P07902	TRUE	Galactose-1-phosphate uridylyltransferase OS=Homo sapiens OX=9606	GALT	0.287295	4.60542	4.54021	N/D	6	2	2	2	379	43.3	6.99	-6.06688	-5.39943	-4.90305	-6.41232	-5.29379	-4.62448	-3.81702	-4.20542	-5.33764
1.94279	0.109794	1.07907	P07910	TRUE	Heterogeneous nuclear ribonucleoproteins C1/C2 OS=Homo sapiens OX=9606	HNRNPC	-0.079074	N/D	N/D	N/D	59	26	2672	26	306	33.7	5.08	6.4982	6.53454	6.45084	6.69547	6.56274	6.60474	6.52998	6.5173	6.53628
1.34826	0.222615	1.16685	P07919	FALSE	Cytochrome b-c1 complex subunit 6, mitochondrial OS=Homo sapiens OX=9606	UQCRH	-0.166847	N/D	N/D	N/D	36	3	153	3	91	10.7	4.44	0.838085	0.780251	0.795458	0.890187	1.06075	1.00545	0.477561	0.855093	0.830629
0.456601	-0.0746109	0.949598	P07947	FALSE	Tyrosine-protein kinase Yes OS=Homo sapiens OX=9606	YES1	0.0504018	3.72491	N/D	N/D	16	9	358	2	543	60.8	6.74	-4.44423	-4.56275	-4.38719	-4.32141	-4.57444	-4.53564	-4.34303	-4.31501	-4.36312
0.302541	0.0258768	1.0181	P07954	FALSE	Fumarate hydratase, mitochondrial OS=Homo sapiens OX=9606	FH	-0.0180983	N/D	N/D	N/D	53	20	947	20	510	54.6	8.76	4.03443	4.17223	4.07356	4.14099	4.15197	4.05751	4.10861	4.0444	4.11243
1.93741	0.135146	1.0982	P07992	FALSE	DNA excision repair protein ERCC-1 OS=Homo sapiens OX=9606	ERCC1	-0.0982039	N/D	N/D	N/D	23	7	106	7	297	32.5	6.25	-1.28318	-1.26275	-1.36881	-1.12232	-1.13432	-1.1096	-1.24515	-1.19495	-1.1885
2.16396	-0.308942	0.807234	P08047	TRUE	Transcription factor Sp1 OS=Homo sapiens OX=9606	SP1	0.192766	4.37803	9.05542	N/D	14	8	147	8	785	80.6	7.34	-0.58868	-0.487469	-0.477438	-1.06079	-0.79004	-0.839842	-0.752753	-0.635971	-0.585377
2.36207	0.0614209	1.04349	P08133	FALSE	Annexin A6 OS=Homo sapiens OX=9606	ANXA6	-0.043493	N/D	N/D	N/D	58	45	3240	45	673	75.8	5.6	6.00276	6.01315	6.05276	6.08127	6.07907	6.05221	5.99841	6.00057	5.98892
1.64803	0.145262	1.10593	P08134	FALSE	Rho-related GTP-binding protein RhoC OS=Homo sapiens OX=9606	RHOC	-0.105931	N/D	N/D	N/D	45	8	662	1	193	22	6.58	-0.957579	-0.88669	-0.963684	-0.786233	-0.683534	-0.743288	-0.80556	-0.778812	-0.905355
0.0235562	-0.0506819	0.96548	P08174	FALSE	Complement decay-accelerating factor OS=Homo sapiens OX=9606	CD55	0.0345201	3.55333	N/D	N/D	12	4	24	4	381	41.4	7.59	-3.72787	-3.7298	-3.58265	-5.16218	-4.62573	-3.63114	-3.72538	-5.91338	-5.85492
1.85795	0.0524195	1.037	P08195	FALSE	4F2 cell-surface antigen heavy chain OS=Homo sapiens OX=9606	SLC3A2	-0.0370026	N/D	N/D	N/D	41	23	1220	23	630	68	5.01	4.18964	4.23759	4.17624	4.23891	4.25709	4.2469	4.16883	4.18315	4.21585
0.420361	0.105793	1.07609	P08236	FALSE	Beta-glucuronidase OS=Homo sapiens OX=9606	GUSB	-0.0760858	N/D	N/D	N/D	4	2	25	2	651	74.7	7.02	-3.28604	-3.08748	-3.44601	-3.05884	-2.95394	-3.36263	-3.09902	-3.21102	-3.25603
0.955122	0.198128	1.14721	P08237	FALSE	ATP-dependent 6-phosphofructokinase, muscle type OS=Homo sapiens OX=9606	PFKM	-0.147208	N/D	N/D	N/D	6	4	185	1	780	85.1	7.99	-2.89276	-3.01692	-2.83652	-2.91565	-2.6604	-2.64179	-2.72412	-3.1646	-2.98952
2.93896	0.0796517	1.05676	P08238	FALSE	Heat shock protein HSP 90-beta OS=Homo sapiens OX=9606	HSP90AB1	-0.0567629	N/D	N/D	N/D	69	63	17088	29	724	83.2	5.03	7.852	7.85591	7.83091	7.93667	7.90791	7.8993	7.82732	7.7966	7.8471
1.26561	0.0843186	1.06019	P08240	FALSE	Signal recognition particle receptor subunit alpha OS=Homo sapiens OX=9606	SRPRA	-0.0601869	N/D	N/D	N/D	26	17	361	17	638	69.8	8.95	1.3609	1.33556	1.23874	1.39009	1.35776	1.33309	1.25162	1.21382	1.25534
1.66177	0.342744	1.26817	P08243	FALSE	Asparagine synthetase [glutamine-hydrolyzing] OS=Homo sapiens OX=9606	ASNS	-0.268166	N/D	N/D	N/D	26	13	159	13	561	64.3	6.86	0.0846157	0.220736	0.232456	0.709229	0.403619	0.656691	0.480514	0.0663967	0.397896
0.653201	-0.318194	0.802074	P08311	FALSE	Cathepsin G OS=Homo sapiens OX=9606	CTSG	0.197926	4.39229	8.53623	N/D	7	2	24	2	255	28.8	11.19	-2.16981	-2.27486	-2.23534	-3.31075	-2.23819	-2.24528	-2.30432	-2.39284	-2.30212
0.0873561	0.0125108	1.00871	P08397	FALSE	Porphobilinogen deaminase OS=Homo sapiens OX=9606	HMBS	-0.00870952	N/D	N/D	N/D	23	8	379	8	361	39.3	7.18	1.79847	1.72404	1.64054	1.83208	1.74995	1.69139	1.8128	1.67912	1.81681
9.09721	0.138173	1.10051	P08559	FALSE	Pyruvate dehydrogenase E1 component subunit alpha, somatic form, mitochondrial OS=Homo sapiens OX=9606	PDHA1	-0.100511	N/D	N/D	N/D	42	15	617	15	390	43.3	8.06	3.02475	3.03618	3.03464	3.16675	3.16729	3.17188	3.02564	3.03354	3.02805
0.0575121	0.0190822	1.01331	P08574	FALSE	Cytochrome c1, heme protein, mitochondrial OS=Homo sapiens OX=9606	CYC1	-0.0133147	N/D	N/D	N/D	28	8	208	8	325	35.4	9	0.832541	0.777103	0.515041	0.821046	0.48175	0.710028	0.728518	0.654541	0.403408
1.18817	0.0339042	1.02378	P08575	TRUE	Receptor-type tyrosine-protein phosphatase C OS=Homo sapiens OX=9606	PTPRC	-0.0237789	N/D	N/D	N/D	38	51	2973	51	1306	147.4	6.15	5.24907	5.21497	5.22812	5.26826	5.25511	5.23347	5.19308	5.19031	5.23471
0.0401839	-0.00645081	0.995539	P08579	FALSE	U2 small nuclear ribonucleoprotein B'' OS=Homo sapiens OX=9606	SNRPB2	0.00446138	2.65141	N/D	N/D	28	7	414	4	225	25.5	9.72	1.16786	1.27292	1.28942	1.17091	1.14752	1.20998	1.20553	1.06256	1.09723
3.11755	0.0863633	1.06169	P08621	FALSE	U1 small nuclear ribonucleoprotein 70 kDa OS=Homo sapiens OX=9606	SNRNP70	-0.0616905	N/D	N/D	N/D	40	20	964	20	437	51.5	9.94	4.33429	4.3595	4.33165	4.42743	4.4069	4.40904	4.34427	4.30475	4.2941
0.129349	-0.153493	0.899071	P08648	FALSE	Integrin alpha-5 OS=Homo sapiens OX=9606	ITGA5	0.100929	4.05022	N/D	N/D	3	3	22	3	1049	114.5	5.77	-3.67359	-4.23732	-4.14207	-5.12577	-4.35129	-3.67918	-5.2634	-4.43346	-3.6417
4.21644	0.0763497	1.05435	P08670	FALSE	Vimentin OS=Homo sapiens OX=9606	VIM	-0.054347	N/D	N/D	N/D	85	45	3234	43	466	53.6	5.12	6.35081	6.34066	6.35548	6.43192	6.42351	6.41768	6.35453	6.32312	6.36355
0.350479	0.0150765	1.01051	P08708	FALSE	40S ribosomal protein S17 OS=Homo sapiens OX=9606	RPS17	-0.010505	N/D	N/D	N/D	56	9	729	9	135	15.5	9.85	4.68633	4.6159	4.60286	4.64634	4.63889	4.6347	4.62427	4.6141	4.60595
2.17759	0.0657872	1.04666	P08754	FALSE	Guanine nucleotide-binding protein G(i) subunit alpha-3 OS=Homo sapiens OX=9606	GNAI3	-0.0466559	N/D	N/D	N/D	30	10	523	5	354	40.5	5.69	0.558355	0.562172	0.581356	0.606568	0.626182	0.610106	0.561667	0.512474	0.514963
1.32437	0.0449567	1.03165	P08758	FALSE	Annexin A5 OS=Homo sapiens OX=9606	ANXA5	-0.0316522	N/D	N/D	N/D	40	13	459	12	320	35.9	5.05	2.02559	2.06502	2.04166	2.12756	2.06957	2.0873	2.04431	2.02993	2.0926
0.800067	0.0645369	1.04575	P08865	FALSE	40S ribosomal protein SA OS=Homo sapiens OX=9606	RPSA	-0.0457492	N/D	N/D	N/D	62	16	1547	16	295	32.8	4.87	5.83372	5.8913	5.78713	5.8377	5.95663	5.88223	5.87017	5.84688	5.73669
0.418161	0.0929885	1.06658	P09001	FALSE	39S ribosomal protein L3, mitochondrial OS=Homo sapiens OX=9606	MRPL3	-0.0665773	N/D	N/D	N/D	26	7	124	7	348	38.6	9.48	0.23735	0.238684	0.310467	0.317698	0.524055	0.251234	0.530889	0.171278	0.139376
2.43793	0.210399	1.15701	P09012	FALSE	U1 small nuclear ribonucleoprotein A OS=Homo sapiens OX=9606	SNRPA	-0.157009	N/D	N/D	N/D	28	8	541	5	282	31.3	9.83	1.89245	1.84261	1.92913	2.12262	2.00914	2.0005	1.82324	1.74983	1.76488
1.31764	0.119246	1.08617	P09104	FALSE	Gamma-enolase OS=Homo sapiens OX=9606	ENO2	-0.0861668	N/D	N/D	N/D	52	16	1019	10	434	47.2	5.03	2.19141	2.39893	2.36504	2.46488	2.50145	2.42096	2.34186	2.34843	2.41342
0.0649088	0.00820208	1.0057	P09110	FALSE	3-ketoacyl-CoA thiolase, peroxisomal OS=Homo sapiens OX=9606	ACAA1	-0.00570144	N/D	N/D	N/D	36	10	253	10	424	44.3	8.44	0.615046	0.7054	0.803497	0.762631	0.762467	0.635695	0.716146	0.719198	0.713087
1.64474	0.163097	1.11969	P09132	FALSE	Signal recognition particle 19 kDa protein OS=Homo sapiens OX=9606	SRP19	-0.119688	N/D	N/D	N/D	35	5	144	5	144	16.1	9.85	-0.267914	-0.331718	-0.275309	-0.0427732	-0.0816412	-0.0420208	-0.220159	-0.115816	-0.100534
3.83374	0.174114	1.12827	P09211	FALSE	Glutathione S-transferase P OS=Homo sapiens OX=9606	GSTP1	-0.128271	N/D	N/D	N/D	70	13	1140	13	210	23.3	5.64	5.65173	5.63531	5.56481	5.83003	5.79173	5.80062	5.64942	5.67272	5.62609
0.612458	0.0675286	1.04792	P09234	FALSE	U1 small nuclear ribonucleoprotein C OS=Homo sapiens OX=9606	SNRPC	-0.04792	N/D	N/D	N/D	25	4	169	4	159	17.4	9.67	2.1369	2.32606	2.31296	2.35845	2.39769	2.25443	2.2956	2.22151	2.32297
1.36265	-0.168158	0.889978	P09326	FALSE	CD48 antigen OS=Homo sapiens OX=9606	CD48	0.110022	4.0921	N/D	N/D	24	6	152	6	243	27.7	8.07	0.921038	0.886541	0.942139	0.701419	0.612969	0.705038	0.849488	0.640949	0.807644
0.331904	-0.109895	0.926655	P09417	FALSE	Dihydropteridine reductase OS=Homo sapiens OX=9606	QDPR	0.0733446	3.89845	N/D	N/D	40	7	257	7	244	25.8	7.37	0.41485	0.0778084	0.481371	0.175563	0.187152	-0.141088	0.0556917	0.00704765	0.065855
2.86259	0.156546	1.11462	P09429	TRUE	High mobility group protein B1 OS=Homo sapiens OX=9606	HMGB1	-0.114615	N/D	N/D	N/D	55	22	3274	16	215	24.9	5.74	6.14914	6.16206	6.17324	6.26293	6.28216	6.27199	6.06713	6.06461	6.07871
0.296293	0.0265298	1.01856	P09488	FALSE	Glutathione S-transferase Mu 1 OS=Homo sapiens OX=9606	GSTM1	-0.0185592	N/D	N/D	N/D	56	14	477	5	218	25.7	6.7	0.808508	0.834885	0.844627	0.791821	0.764489	0.88855	0.760753	0.72501	0.75676
0.705425	-0.133287	0.911752	P09493	FALSE	Tropomyosin alpha-1 chain OS=Homo sapiens OX=9606	TPM1	0.0882482	3.98583	N/D	N/D	18	7	736	2	284	32.7	4.74	-1.27147	-0.813095	-1.01803	-1.09459	-1.15263	-1.18393	-1.04214	-1.0081	-0.909733
0.495155	0.0302634	1.0212	P09496	FALSE	Clathrin light chain A OS=Homo sapiens OX=9606	CLTA	-0.0211986	N/D	N/D	N/D	20	7	500	7	248	27.1	4.51	3.42338	3.35355	3.35337	3.45429	3.44694	3.41932	3.45035	3.45632	3.42255
1.18204	0.0295663	1.02071	P09497	FALSE	Clathrin light chain B OS=Homo sapiens OX=9606	CLTB	-0.0207052	N/D	N/D	N/D	28	9	321	9	229	25.2	4.64	1.70279	1.71533	1.66973	1.74296	1.71457	1.70809	1.67336	1.68309	1.70954
0.885478	0.248721	1.18815	P09525	FALSE	Annexin A4 OS=Homo sapiens OX=9606	ANXA4	-0.188153	N/D	N/D	N/D	15	6	58	5	319	35.9	6.13	-2.5857	-2.62757	-2.92101	-2.4723	-2.5941	-2.44517	-2.6456	-3.16126	-2.57434
0.0147348	0.00168371	1.00117	P09543	FALSE	2',3'-cyclic-nucleotide 3'-phosphodiesterase OS=Homo sapiens OX=9606	CNP	-0.00116774	N/D	N/D	N/D	36	18	634	18	421	47.5	9.07	2.62029	2.50229	2.60611	2.52011	2.61507	2.64213	2.6027	2.5657	2.64743
0.507594	-0.0347644	0.976191	P09564	FALSE	T-cell antigen CD7 OS=Homo sapiens OX=9606	CD7	0.0238089	3.3872	N/D	N/D	20	3	126	3	240	25.4	7.27	-0.536661	-0.468397	-0.424088	-0.516549	-0.569512	-0.503395	-0.554864	-0.511347	-0.47497
1.29058	0.0528973	1.03735	P09622	FALSE	Dihydrolipoyl dehydrogenase, mitochondrial OS=Homo sapiens OX=9606	DLD	-0.0373461	N/D	N/D	N/D	42	17	837	17	509	54.1	7.85	3.67162	3.69483	3.69531	3.71971	3.69179	3.71289	3.62889	3.61284	3.62791
2.85977	0.812108	1.75577	P09651	FALSE	Heterogeneous nuclear ribonucleoprotein A1 OS=Homo sapiens OX=9606	HNRNPA1	-0.755774	N/D	N/D	N/D	70	32	4536	4	372	38.7	9.13	3.4847	3.48634	3.53796	4.59674	4.51398	4.5503	3.92894	4.04224	3.96919
1.3362	-0.0659531	0.955314	P09661	FALSE	U2 small nuclear ribonucleoprotein A' OS=Homo sapiens OX=9606	SNRPA1	0.044686	3.67003	N/D	N/D	37	12	567	12	255	28.4	8.62	3.44743	3.43029	3.37991	3.39348	3.32658	3.37289	3.46196	3.3851	3.47693
2.37474	-0.132533	0.912229	P09669	FALSE	Cytochrome c oxidase subunit 6C OS=Homo sapiens OX=9606	COX6C	0.0877713	3.98325	N/D	N/D	43	4	209	4	75	8.8	10.39	1.50044	1.42386	1.34463	1.27382	1.3044	1.26362	1.39592	1.39153	1.42247
0.850195	0.0893118	1.06386	P09693	FALSE	T-cell surface glycoprotein CD3 gamma chain OS=Homo sapiens OX=9606	CD3G	-0.0638625	N/D	N/D	N/D	42	8	324	8	182	20.5	8.4	2.48206	2.52815	2.6578	2.65413	2.73273	2.65541	2.64279	2.5414	2.69648
0.0750201	0.00860866	1.00598	P09874	FALSE	Poly [ADP-ribose] polymerase 1 OS=Homo sapiens OX=9606	PARP1	-0.00598491	N/D	N/D	N/D	35	39	1178	39	1014	113	8.88	3.19894	3.35634	3.21995	3.3092	3.28368	3.2012	3.29831	3.22616	3.2368
0.471383	0.028845	1.0202	P09884	TRUE	DNA polymerase alpha catalytic subunit OS=Homo sapiens OX=9606	POLA1	-0.020195	N/D	N/D	N/D	22	30	647	30	1462	165.8	5.85	2.07435	2.09397	2.05754	2.07731	2.08932	2.0475	1.97878	2.05296	1.99759
4.33774	0.108788	1.07832	P09960	TRUE	Leukotriene A-4 hydrolase OS=Homo sapiens OX=9606	LTA4H	-0.0783217	N/D	N/D	N/D	54	29	1128	29	611	69.2	6.18	3.75427	3.74416	3.71698	3.86496	3.85356	3.82101	3.74375	3.72271	3.74443
1.42293	0.134342	1.09759	P09972	FALSE	Fructose-bisphosphate aldolase C OS=Homo sapiens OX=9606	ALDOC	-0.0975924	N/D	N/D	N/D	46	13	523	9	364	39.4	6.87	1.70199	1.56748	1.5607	1.87478	1.69961	1.71453	1.69136	1.59261	1.65764
8.18207	0.690141	1.61344	P0AEX9	FALSE	Maltose/maltodextrin-binding periplasmic protein OS=Escherichia coli (strain K12) OX=83333	MBP	-0.613441	N/D	N/D	N/D	79	35	19351	35	396	43.4	5.71	10.355	10.3234	10.3477	11.0122	11.0019	10.9931	10.2887	10.2703	10.2885
1.14412	-0.796805	0.575622	P0C1Z6	TRUE	TCF3 fusion partner OS=Homo sapiens OX=9606	TFPT	0.424378	4.86761	2.92126	N/D	10	2	52	2	253	28.3	5.21	-2.71129	-2.77711	-2.56427	-2.86608	-2.97066	-4.61693	-2.56529	-2.78492	-2.72364
0.217661	-0.0670851	0.954565	P0C7P0	FALSE	CDGSH iron-sulfur domain-containing protein 3, mitochondrial OS=Homo sapiens OX=9606	CISD3	0.0454353	3.67759	N/D	N/D	35	4	109	4	127	14.2	10.55	-1.87631	-1.9193	-1.96559	-1.74012	-2.1309	-1.76493	-1.54511	-1.84411	-1.71895
0.505029	0.244328	1.18454	P0C7T5	FALSE	Ataxin-1-like OS=Homo sapiens OX=9606	ATXN1L	-0.184541	N/D	N/D	N/D	5	3	22	3	689	73.3	6.6	-4.18781	-4.22216	-4.91949	-4.03503	-4.24522	-4.72204	-4.77112	-4.65057	-4.71941
0.152411	0.0434426	1.03057	P0CAP2	FALSE	DNA-directed RNA polymerase II subunit GRINL1A OS=Homo sapiens OX=9606	POLR2M	-0.03057	N/D	N/D	N/D	34	10	113	10	368	41.7	6.39	-0.878662	-0.435541	-0.460733	-0.484273	-0.476558	-0.451674	-0.41216	-0.50988	-0.388687
0.0926274	0.0299627	1.02099	P0CG08	FALSE	Golgi pH regulator B OS=Homo sapiens OX=9606	GPR89B	-0.0209857	N/D	N/D	N/D	5	2	27	2	455	52.9	9.28	-3.83476	-3.92243	-3.59	-3.56891	-3.56962	-3.93929	-3.61092	-3.79118	-3.58613
1.44656	-0.433692	0.740365	P0CG12	FALSE	Decreased expression in renal and prostate cancer protein OS=Homo sapiens OX=9606	DERPC	0.259635	4.54492	5.2418	N/D	39	12	212	12	524	51.4	12.41	-0.0110626	-0.0444012	-0.164478	-0.0196371	-0.692119	-0.777868	-0.196622	0.0495567	-0.0100918
3.30342	1.26288	2.39974	P0CG13	FALSE	Chromosome transmission fidelity protein 8 homolog OS=Homo sapiens OX=9606	CHTF8	-1.39974	N/D	N/D	N/D	21	2	8	2	121	13.3	8.18	-4.81457	-4.82978	-4.6266	-3.42843	-3.39353	-3.43692	-4.24517	-4.37405	-5.20484
0.22675	0.116819	1.08434	P0CG39	FALSE	POTE ankyrin domain family member J OS=Homo sapiens OX=9606	POTEJ	-0.084341	N/D	N/D	N/D	9	7	5525	1	1038	117.3	5.97	-0.577307	-0.634933	-0.237114	-0.287038	0.116164	-0.126265	0.093379	-0.0159645	0.0767517
0.110533	0.0293606	1.02056	P0DJ93	FALSE	Small integral membrane protein 13 OS=Homo sapiens OX=9606	SMIM13	-0.0205597	N/D	N/D	N/D	12	1	1	1	91	10.3	6.67	-5.02169	-4.72798	-5.0387	-4.91698	-4.90075	-5.02077	-4.94067	-5.21207	-4.91204
1.18427	0.0925622	1.06626	P0DMV9	FALSE	Heat shock 70 kDa protein 1B OS=Homo sapiens OX=9606	HSPA1B	-0.0662622	N/D	N/D	N/D	42	25	2348	15	641	70	5.66	3.03618	3.06154	3.02276	3.18731	3.20391	3.18633	3.18098	3.11682	3.18144
2.07138	-0.141129	0.906809	P0DP25	FALSE	Calmodulin-3 OS=Homo sapiens OX=9606	CALM3	0.093191	4.01186	N/D	N/D	55	10	901	8	149	16.8	4.22	3.86503	3.96807	3.98097	3.7591	3.73118	3.76398	3.85528	3.83832	3.84763
7.17813	-1.2534	0.419459	P0DPB5	FALSE	Protein POLR1D, isoform 2 OS=Homo sapiens OX=9606	POLR1D	0.580541	5.14114	2.23162	5.14114	20	3	54	2	122	14.3	9.88	-1.75107	-1.62283	-1.74537	-3.00639	-2.88821	-2.90827	-1.67383	-1.73913	-1.55314
3.29647	0.16355	1.12004	P0DPB6	FALSE	DNA-directed RNA polymerases I and III subunit RPAC2 OS=Homo sapiens OX=9606	POLR1D	-0.120039	N/D	N/D	N/D	65	6	209	5	133	15.2	5.8	0.738607	0.797235	0.782518	0.944556	0.91328	0.924881	0.825149	0.722692	0.717934
0.750905	0.219315	1.16418	P0DPD7	TRUE	EEF1A lysine methyltransferase 4 OS=Homo sapiens OX=9606	EEF1AKMT4	-0.16418	N/D	N/D	N/D	16	4	147	1	255	28.3	6.05	-3.04307	-2.96196	-2.81307	-2.94582	-2.57514	-2.99397	-3.37189	-2.96445	-3.19131
1.2893	0.0670269	1.04756	P10109	FALSE	Adrenodoxin, mitochondrial OS=Homo sapiens OX=9606	FDX1	-0.0475557	N/D	N/D	N/D	18	4	97	4	184	19.4	5.83	-0.301151	-0.275366	-0.204809	-0.25384	-0.200566	-0.177351	-0.326768	-0.28475	-0.272833
0.538806	-0.0690748	0.953249	P10114	FALSE	Ras-related protein Rap-2a OS=Homo sapiens OX=9606	RAP2A	0.0467509	3.69058	N/D	N/D	17	4	148	1	183	20.6	4.82	-3.88144	-4.04191	-3.96083	-3.88007	-4.13787	-4.0007	-3.89935	-3.89908	-3.94022
0.182641	-0.0232991	0.98398	P10155	FALSE	RNA-binding protein RO60 OS=Homo sapiens OX=9606	RO60	0.01602	3.21168	N/D	N/D	28	15	291	15	538	60.6	8.03	2.44124	2.48649	2.44894	2.29285	2.41454	2.40754	2.31863	2.33959	2.33474
1.36687	-0.163562	0.892818	P10242	TRUE	Transcriptional activator Myb OS=Homo sapiens OX=9606	MYB	0.107182	4.07936	N/D	N/D	11	7	100	7	640	72.3	6.83	-1.28208	-1.27596	-1.37659	-1.38609	-1.67002	-1.43172	-1.33004	-1.41591	-1.31369
3.53185	-0.677671	0.625174	P10244	TRUE	Myb-related protein B OS=Homo sapiens OX=9606	MYBL2	0.374826	4.77783	3.30936	4.77783	4	2	21	2	700	78.7	6.87	-3.25548	-3.40671	-3.28788	-4.06734	-3.81419	-4.18772	-3.45377	-3.48612	-3.18253
0.273631	0.0888311	1.06351	P10253	FALSE	Lysosomal alpha-glucosidase OS=Homo sapiens OX=9606	GAA	-0.0635082	N/D	N/D	N/D	8	7	74	7	952	105.3	6	-0.847189	-0.568096	-0.929613	-0.683843	-0.823041	-0.937712	-0.993873	-0.866512	-1.21689
0.761774	0.341048	1.26668	P10321	TRUE	HLA class I histocompatibility antigen, C alpha chain OS=Homo sapiens OX=9606	HLA-C	-0.266676	N/D	N/D	N/D	33	9	442	4	366	40.6	6.04	-2.11487	-1.64064	-1.40081	-1.33834	-1.28543	-1.28845	-1.28222	-2.09277	-1.33942
0.500512	0.360694	1.28404	P10398	FALSE	Serine/threonine-protein kinase A-Raf OS=Homo sapiens OX=9606	ARAF	-0.284044	N/D	N/D	N/D	25	14	225	8	606	67.5	9.01	-2.42428	-2.36841	-2.65136	-2.96219	-1.57423	-1.68051	-2.21439	-2.10575	-2.83384
0.197461	0.0158966	1.01108	P10412	TRUE	Histone H1.4 OS=Homo sapiens OX=9606	H1-4	-0.0110796	N/D	N/D	N/D	31	9	715	1	219	21.9	11.03	1.16547	1.12716	1.03704	1.13504	1.15515	1.17227	1.17404	1.15817	1.16766
1.70332	0.120169	1.08686	P10515	FALSE	Dihydrolipoyllysine-residue acetyltransferase component of pyruvate dehydrogenase complex, mitochondrial OS=Homo sapiens OX=9606	DLAT	-0.0868625	N/D	N/D	N/D	27	14	463	14	647	69	7.84	3.05989	3.14721	3.19979	3.21676	3.19548	3.32636	3.08459	3.11716	3.14755
2.3129	0.190341	1.14103	P10599	FALSE	Thioredoxin OS=Homo sapiens OX=9606	TXN	-0.141034	N/D	N/D	N/D	52	7	584	7	105	11.7	4.92	4.82488	4.90509	4.81546	5.14196	5.08544	4.98848	4.89727	4.98249	4.86451
0.903853	0.0520234	1.03672	P10606	FALSE	Cytochrome c oxidase subunit 5B, mitochondrial OS=Homo sapiens OX=9606	COX5B	-0.0367179	N/D	N/D	N/D	30	5	348	5	129	13.7	8.81	2.2239	2.2051	2.14956	2.31344	2.22021	2.23272	2.24069	2.16449	2.23684
0.925437	-0.232501	0.851158	P10619	FALSE	Lysosomal protective protein OS=Homo sapiens OX=9606	CTSA	0.148842	4.24271	20.3474	N/D	8	4	81	4	480	54.4	6.61	-0.721182	-0.663757	-0.604324	-0.89461	-0.984044	-1.00242	-0.967193	-0.983885	-0.426802
0.852361	0.0475669	1.03352	P10644	FALSE	cAMP-dependent protein kinase type I-alpha regulatory subunit OS=Homo sapiens OX=9606	PRKAR1A	-0.0335204	N/D	N/D	N/D	27	12	568	10	381	43	5.35	2.46828	2.45025	2.55823	2.54196	2.55004	2.59538	2.53312	2.53717	2.54233
0.248995	0.0559325	1.03953	P10746	FALSE	Uroporphyrinogen-III synthase OS=Homo sapiens OX=9606	UROS	-0.0395308	N/D	N/D	N/D	38	7	110	7	265	28.6	5.48	-1.94036	-2.22858	-2.03138	-1.96068	-1.88982	-1.97264	-2.01206	-1.75863	-2.01086
1.50852	0.105296	1.07572	P10747	TRUE	T-cell-specific surface glycoprotein CD28 OS=Homo sapiens OX=9606	CD28	-0.0757153	N/D	N/D	N/D	13	3	93	3	220	25.1	9.39	-1.27021	-1.31126	-1.34527	-1.26411	-1.17618	-1.26243	-1.35346	-1.43973	-1.3173
2.95044	0.138463	1.10073	P10768	FALSE	S-formylglutathione hydrolase OS=Homo sapiens OX=9606	ESD	-0.100732	N/D	N/D	N/D	59	11	945	11	282	31.4	7.02	4.35521	4.29977	4.24187	4.43909	4.47718	4.44042	4.33939	4.30451	4.34186
3.43285	0.104609	1.0752	P10809	FALSE	60 kDa heat shock protein, mitochondrial OS=Homo sapiens OX=9606	HSPD1	-0.0752032	N/D	N/D	N/D	72	42	6006	42	573	61	5.87	8.12786	8.07249	8.08364	8.23012	8.21193	8.19131	8.13539	8.11008	8.10961
1.86722	0.0673579	1.0478	P11021	FALSE	Endoplasmic reticulum chaperone BiP OS=Homo sapiens OX=9606	HSPA5	-0.047796	N/D	N/D	N/D	55	38	3341	36	654	72.3	5.16	5.89703	5.8664	5.87357	5.96112	5.90184	5.94582	5.87978	5.81483	5.88179
0.478292	-0.192609	0.875022	P11117	TRUE	Lysosomal acid phosphatase OS=Homo sapiens OX=9606	ACP2	0.124978	4.15482	80.6085	N/D	13	5	101	5	423	48.3	6.74	-1.80265	-1.42659	-1.20576	-1.87319	-1.77429	-1.34625	-1.52262	-1.69689	-1.17729
2.39383	0.0623199	1.04414	P11142	FALSE	Heat shock cognate 71 kDa protein OS=Homo sapiens OX=9606	HSPA8	-0.0441434	N/D	N/D	N/D	71	42	12409	29	646	70.9	5.52	8.35184	8.36355	8.33751	8.38112	8.4082	8.40431	8.3436	8.31408	8.30276
4.23301	-0.410273	0.752481	P11166	FALSE	Solute carrier family 2, facilitated glucose transporter member 1 OS=Homo sapiens OX=9606	SLC2A1	0.247519	4.51711	5.64266	N/D	11	5	99	5	492	54	8.72	0.0316849	0.160433	0.0725632	-0.34533	-0.393006	-0.210352	0.067441	0.0731735	0.158968
1.27843	-0.0302545	0.979248	P11171	FALSE	Protein 4.1 OS=Homo sapiens OX=9606	EPB41	0.0207525	3.32618	N/D	N/D	39	29	779	29	864	97	5.58	3.13506	3.16949	3.17168	3.1097	3.12064	3.12909	3.1655	3.12764	3.13103
2.4346	0.112695	1.08125	P11172	FALSE	Uridine 5'-monophosphate synthase OS=Homo sapiens OX=9606	UMPS	-0.0812463	N/D	N/D	N/D	41	23	624	23	480	52.2	7.24	2.95137	2.97641	2.94115	3.04818	3.14284	3.0136	2.94607	2.95961	2.95845
0.834071	0.123317	1.08924	P11177	FALSE	Pyruvate dehydrogenase E1 component subunit beta, mitochondrial OS=Homo sapiens OX=9606	PDHB	-0.0892363	N/D	N/D	N/D	42	12	301	12	359	39.2	6.65	3.48682	3.25658	3.32119	3.48794	3.34432	3.4486	3.3809	3.18045	3.19587
1.10433	0.187979	1.13917	P11182	FALSE	Lipoamide acyltransferase component of branched-chain alpha-keto acid dehydrogenase complex, mitochondrial OS=Homo sapiens OX=9606	DBT	-0.139166	N/D	N/D	N/D	28	10	157	10	482	53.5	8.51	0.154045	0.173126	0.101431	0.444913	0.194306	0.304518	-0.0503378	0.335978	0.0453606
2.18078	0.0989814	1.07102	P11216	FALSE	Glycogen phosphorylase, brain form OS=Homo sapiens OX=9606	PYGB	-0.071017	N/D	N/D	N/D	32	29	856	24	843	96.6	6.86	1.91609	1.99267	2.01109	2.05921	2.11974	2.03394	1.97062	1.98579	1.95561
2.6891	0.621983	1.53899	P11233	FALSE	Ras-related protein Ral-A OS=Homo sapiens OX=9606	RALA	-0.538989	N/D	N/D	N/D	33	7	202	5	206	23.6	7.11	-2.07372	-1.82477	-1.5897	-1.08809	-1.04186	-1.07009	-1.57636	-1.52452	-1.54292
0.833585	-0.147383	0.902887	P11234	FALSE	Ras-related protein Ral-B OS=Homo sapiens OX=9606	RALB	0.097113	4.03164	N/D	N/D	13	3	113	1	206	23.4	6.62	-1.43069	-1.67515	-1.66187	-1.6258	-1.80728	-1.75415	-1.56665	-1.74899	-1.4068
0.074207	0.00928895	1.00646	P11274	FALSE	Breakpoint cluster region protein OS=Homo sapiens OX=9606	BCR	-0.00645938	N/D	N/D	N/D	20	22	451	21	1271	142.7	7.03	0.449585	0.579426	0.452303	0.572553	0.512725	0.451065	0.488864	0.456703	0.590071
3.87577	-0.286683	0.819785	P11277	FALSE	Spectrin beta chain, erythrocytic OS=Homo sapiens OX=9606	SPTB	0.180215	4.34209	10.6736	N/D	3	6	228	1	2137	246.3	5.27	-3.04674	-3.06815	-3.18115	-3.3802	-3.42607	-3.39218	-3.07922	-3.10559	-3.19596
0.314543	0.0343944	1.02413	P11279	FALSE	Lysosome-associated membrane glycoprotein 1 OS=Homo sapiens OX=9606	LAMP1	-0.0241269	N/D	N/D	N/D	14	5	246	5	417	44.9	8.75	1.45622	1.45469	1.28087	1.47437	1.37851	1.48351	1.44142	1.38669	1.44653
2.36156	0.118276	1.08544	P11310	FALSE	Medium-chain specific acyl-CoA dehydrogenase, mitochondrial OS=Homo sapiens OX=9606	ACADM	-0.0854373	N/D	N/D	N/D	34	14	584	14	421	46.6	8.37	3.04657	3.09267	3.11031	3.2365	3.19927	3.24106	3.14967	3.07649	3.16829
3.65476	0.149244	1.10899	P11387	FALSE	DNA topoisomerase 1 OS=Homo sapiens OX=9606	TOP1	-0.108988	N/D	N/D	N/D	35	28	775	28	765	90.7	9.31	2.18158	2.22048	2.15802	2.28061	2.35191	2.36913	2.1864	2.18346	2.17791
0.438824	-0.0231458	0.984085	P11388	FALSE	DNA topoisomerase 2-alpha OS=Homo sapiens OX=9606	TOP2A	0.0159155	3.20879	N/D	N/D	27	45	1274	35	1531	174.3	8.72	2.2078	2.15103	2.13254	2.11601	2.13126	2.10906	2.14879	2.08959	2.12177
2.91133	0.0663228	1.04704	P11413	FALSE	Glucose-6-phosphate 1-dehydrogenase OS=Homo sapiens OX=9606	G6PD	-0.0470445	N/D	N/D	N/D	55	30	1312	30	515	59.2	6.84	4.69418	4.67337	4.64944	4.75865	4.71719	4.72743	4.66772	4.65205	4.67183
2.13636	0.113296	1.0817	P11441	FALSE	Ubiquitin-like protein 4A OS=Homo sapiens OX=9606	UBL4A	-0.0816965	N/D	N/D	N/D	38	7	167	7	157	17.8	8.66	1.47865	1.4203	1.3932	1.57662	1.57712	1.55193	1.45396	1.44784	1.53763
0.170935	-0.0559799	0.961941	P11498	FALSE	Pyruvate carboxylase, mitochondrial OS=Homo sapiens OX=9606	PC	0.0380591	3.59731	N/D	N/D	23	24	556	24	1178	129.6	6.84	1.60585	2.04553	1.51697	1.56046	1.58888	1.53839	1.52703	1.53842	1.47753
2.31355	0.0643106	1.04559	P11586	FALSE	C-1-tetrahydrofolate synthase, cytoplasmic OS=Homo sapiens OX=9606	MTHFD1	-0.0455851	N/D	N/D	N/D	54	44	2456	43	935	101.5	7.3	5.64934	5.67057	5.63712	5.69194	5.72602	5.70366	5.66481	5.60468	5.63084
3.72807	0.069742	1.04953	P11717	FALSE	Cation-independent mannose-6-phosphate receptor OS=Homo sapiens OX=9606	IGF2R	-0.049529	N/D	N/D	N/D	28	60	1986	60	2491	274.2	5.94	3.66666	3.67358	3.66708	3.75461	3.76109	3.73702	3.69273	3.68563	3.70131
4.02756	0.127351	1.09229	P11766	FALSE	Alcohol dehydrogenase class-3 OS=Homo sapiens OX=9606	ADH5	-0.092286	N/D	N/D	N/D	38	13	1044	13	374	39.7	7.49	4.37969	4.36897	4.31815	4.49594	4.46042	4.46228	4.33697	4.33654	4.33286
2.08314	0.118688	1.08575	P11802	FALSE	Cyclin-dependent kinase 4 OS=Homo sapiens OX=9606	CDK4	-0.0857469	N/D	N/D	N/D	32	8	542	7	303	33.7	7.01	0.126165	0.0365276	-0.0140018	0.202773	0.170501	0.155264	0.0831118	0.0194187	0.0937271
0.665896	0.270511	1.20623	P11831	TRUE	Serum response factor OS=Homo sapiens OX=9606	SRF	-0.206235	N/D	N/D	N/D	2	1	7	1	508	51.6	8.1	-4.19607	-4.00773	-4.04952	-4.05813	-3.66267	-4.08774	-4.15756	-4.79375	-4.03553
0.987605	0.0415978	1.02925	P11908	FALSE	Ribose-phosphate pyrophosphokinase 2 OS=Homo sapiens OX=9606	PRPS2	-0.0292531	N/D	N/D	N/D	63	18	711	8	318	34.7	6.61	5.67286	5.60954	5.66856	5.70693	5.70734	5.67999	5.61831	5.66593	5.70375
0.740941	-0.0477659	0.967433	P11940	FALSE	Polyadenylate-binding protein 1 OS=Homo sapiens OX=9606	PABPC1	0.0325667	3.52715	N/D	N/D	52	28	2295	8	636	70.6	9.5	4.08127	4.0932	4.00953	3.93999	4.05697	4.01969	4.0294	4.01779	4.08872
1.52373	0.0447777	1.03152	P12004	FALSE	Proliferating cell nuclear antigen OS=Homo sapiens OX=9606	PCNA	-0.0315242	N/D	N/D	N/D	54	12	1849	12	261	28.8	4.69	5.92419	5.96391	5.96311	5.97264	5.97803	6.01181	5.92807	5.91163	5.9654
2.93058	0.607751	1.52388	P12036	FALSE	Neurofilament heavy polypeptide OS=Homo sapiens OX=9606	NEFH	-0.523882	N/D	N/D	N/D	3	3	174	1	1026	112.4	6.18	0.688755	0.67473	0.740705	1.20358	1.13904	1.07618	0.403829	0.367073	0.31601
0.539323	0.338834	1.26473	P12074	FALSE	Cytochrome c oxidase subunit 6A1, mitochondrial OS=Homo sapiens OX=9606	COX6A1	-0.264734	N/D	N/D	N/D	43	2	219	2	109	12.1	9.32	0.0284195	1.26266	1.27969	1.36677	1.34476	1.4018	1.17034	1.19062	1.26191
0.376787	-0.0203099	0.986021	P12081	FALSE	Histidine--tRNA ligase, cytoplasmic OS=Homo sapiens OX=9606	HARS1	0.0139791	3.15159	N/D	N/D	39	22	1100	15	509	57.4	5.88	3.92764	3.92743	3.97641	3.90636	3.95726	3.92594	3.93807	3.91987	4.01158
1.02466	-0.0624973	0.957605	P12235	FALSE	ADP/ATP translocase 1 OS=Homo sapiens OX=9606	SLC25A4	0.0423949	3.64613	N/D	N/D	56	18	1420	4	298	33	9.76	0.853613	0.881132	0.912975	0.774758	0.793681	0.774967	0.820069	0.757141	0.836866
0.436205	-0.0203703	0.98598	P12236	FALSE	ADP/ATP translocase 3 OS=Homo sapiens OX=9606	SLC25A6	0.0140204	3.15289	N/D	N/D	61	20	1806	4	298	32.8	9.74	2.88522	2.88791	2.87907	2.85371	2.82638	2.84319	2.88091	2.81121	2.82445
1.57978	0.16368	1.12014	P12259	FALSE	Coagulation factor V OS=Homo sapiens OX=9606	F5	-0.120141	N/D	N/D	N/D	4	9	290	9	2224	251.5	6.05	0.0278397	-0.0109787	0.0494385	0.257327	0.21419	0.272604	0.0292921	0.200972	0.209599
3.78167	0.106188	1.07638	P12268	FALSE	Inosine-5'-monophosphate dehydrogenase 2 OS=Homo sapiens OX=9606	IMPDH2	-0.0763806	N/D	N/D	N/D	61	27	2184	24	514	55.8	6.9	5.14233	5.10279	5.08722	5.21656	5.20848	5.23287	5.09025	5.13394	5.12214
1.84214	0.0585113	1.04139	P12270	TRUE	Nucleoprotein TPR OS=Homo sapiens OX=9606	TPR	-0.0413906	N/D	N/D	N/D	37	84	2324	83	2363	267.1	5.02	4.05406	4.04514	4.01783	4.10624	4.0996	4.09192	4.08507	4.04385	3.99849
0.773028	0.402028	1.32136	P12544	FALSE	Granzyme A OS=Homo sapiens OX=9606	GZMA	-0.321364	N/D	N/D	N/D	4	1	9	1	262	29	8.91	-4.61816	-4.90384	-4.94534	-3.69393	-4.82689	-4.72924	-5.05572	-4.79823	-4.59101
3.17071	0.1915	1.14195	P12694	FALSE	2-oxoisovalerate dehydrogenase subunit alpha, mitochondrial OS=Homo sapiens OX=9606	BCKDHA	-0.141951	N/D	N/D	N/D	36	13	425	13	445	50.4	8.27	0.35825	0.456287	0.388166	0.581185	0.627202	0.608631	0.447089	0.356003	0.47924
2.11511	0.0852389	1.06086	P12814	FALSE	Alpha-actinin-1 OS=Homo sapiens OX=9606	ACTN1	-0.0608634	N/D	N/D	N/D	57	45	1912	27	892	103	5.41	3.04539	3.08697	3.03446	3.16645	3.13675	3.13127	3.09171	3.00533	3.09366
0.0685337	-0.0397627	0.972815	P12829	FALSE	Myosin light chain 4 OS=Homo sapiens OX=9606	MYL4	0.027185	3.4463	N/D	N/D	22	4	30	4	197	21.6	5.03	-2.71749	-2.93372	-3.25442	-2.59386	-3.40866	-2.7289	-2.67671	-2.75511	-2.88681
0.511661	0.300485	1.23156	P12931	FALSE	Proto-oncogene tyrosine-protein kinase Src OS=Homo sapiens OX=9606	SRC	-0.231559	N/D	N/D	N/D	17	9	121	4	536	59.8	7.42	-2.60995	-2.48227	-2.58147	-2.2204	-2.48175	-2.56535	-3.62052	-2.48104	-2.56266
1.76043	0.134691	1.09786	P12955	FALSE	Xaa-Pro dipeptidase OS=Homo sapiens OX=9606	PEPD	-0.0978577	N/D	N/D	N/D	35	13	407	13	493	54.5	6	2.22207	2.11715	2.14216	2.23066	2.26287	2.26024	2.11779	1.99914	2.10109
2.11089	0.0954426	1.06839	P12956	FALSE	X-ray repair cross-complementing protein 6 OS=Homo sapiens OX=9606	XRCC6	-0.0683931	N/D	N/D	N/D	54	34	1843	34	609	69.8	6.64	5.27212	5.21987	5.25674	5.38899	5.33898	5.38774	5.33943	5.28385	5.28673
0.65383	0.0429387	1.03021	P13010	TRUE	X-ray repair cross-complementing protein 5 OS=Homo sapiens OX=9606	XRCC5	-0.0302102	N/D	N/D	N/D	60	44	2688	44	732	82.7	5.81	5.88512	5.96053	5.98344	5.95863	5.94391	6.03059	5.96412	5.87427	5.94114
2.2212	-0.461663	0.726149	P13051	TRUE	Uracil-DNA glycosylase OS=Homo sapiens OX=9606	UNG	0.273851	4.57649	4.85034	N/D	49	9	141	9	313	34.6	9.32	0.578392	0.656414	0.637035	0.0950708	0.147023	-0.183983	0.264127	0.384903	0.36533
2.28731	-0.872607	0.546159	P13056	FALSE	Nuclear receptor subfamily 2 group C member 1 OS=Homo sapiens OX=9606	NR2C1	0.453841	4.91958	2.74382	N/D	2	1	3	1	603	67.3	6.32	-4.00021	-3.88002	-4.05605	-4.43279	-4.47476	-5.32898	-3.71639	-3.61075	-3.97399
1.90354	0.0733552	1.05216	P13073	FALSE	Cytochrome c oxidase subunit 4 isoform 1, mitochondrial OS=Homo sapiens OX=9606	COX4I1	-0.0521608	N/D	N/D	N/D	40	9	783	9	169	19.6	9.51	3.64176	3.57818	3.58282	3.69738	3.63265	3.65922	3.60851	3.5591	3.568
0.210191	-0.0812211	0.945257	P13196	FALSE	5-aminolevulinate synthase, nonspecific, mitochondrial OS=Homo sapiens OX=9606	ALAS1	0.0547428	3.76278	N/D	N/D	9	3	17	3	640	70.5	8.46	-3.26966	-3.59342	-3.46695	-3.68853	-3.82066	-3.28433	-3.58471	-3.37519	-3.80979
0.0448938	0.0179162	1.0125	P13284	FALSE	Gamma-interferon-inducible lysosomal thiol reductase OS=Homo sapiens OX=9606	IFI30	-0.012496	N/D	N/D	N/D	4	1	27	1	250	27.9	4.88	-3.6195	-3.80743	-3.64145	-3.3886	-3.92085	-3.60778	-3.87319	-3.5751	-3.42528
2.60898	0.121567	1.08792	P13473	FALSE	Lysosome-associated membrane glycoprotein 2 OS=Homo sapiens OX=9606	LAMP2	-0.0879158	N/D	N/D	N/D	6	3	144	3	410	44.9	5.63	1.83863	1.80663	1.85653	1.99823	1.92809	2.0002	1.90153	1.83236	1.88798
1.4587	0.0459323	1.03235	P13489	FALSE	Ribonuclease inhibitor OS=Homo sapiens OX=9606	RNH1	-0.0323501	N/D	N/D	N/D	48	15	863	15	461	49.9	4.82	3.56915	3.62257	3.54979	3.64545	3.60938	3.62508	3.57744	3.56249	3.6028
1.27705	-0.0727979	0.950792	P13598	FALSE	Intercellular adhesion molecule 2 OS=Homo sapiens OX=9606	ICAM2	0.0492077	3.71395	N/D	N/D	21	5	133	5	275	30.6	7.43	0.383694	0.403738	0.397499	0.312646	0.413604	0.316158	0.423059	0.490911	0.422703
1.03281	0.0587331	1.04155	P13612	FALSE	Integrin alpha-4 OS=Homo sapiens OX=9606	ITGA4	-0.0415508	N/D	N/D	N/D	38	30	923	30	1032	114.8	6.48	3.31315	3.3014	3.29774	3.3201	3.33547	3.31372	3.24027	3.18121	3.25243
0.13155	0.0476699	1.03359	P13637	TRUE	Sodium/potassium-transporting ATPase subunit alpha-3 OS=Homo sapiens OX=9606	ATP1A3	-0.0335942	N/D	N/D	N/D	26	22	684	10	1013	111.7	5.38	-0.980473	-0.850187	-0.606361	-0.68706	-1.03771	-0.651234	-1.11912	-0.720911	-0.760971
4.39664	0.0993295	1.07128	P13639	FALSE	Elongation factor 2 OS=Homo sapiens OX=9606	EEF2	-0.0712754	N/D	N/D	N/D	69	57	10102	56	858	95.3	6.83	8.06013	8.04492	8.05194	8.15906	8.14713	8.15429	8.06818	8.02499	8.07484
5.06668	0.0929828	1.06657	P13667	FALSE	Protein disulfide-isomerase A4 OS=Homo sapiens OX=9606	PDIA4	-0.066573	N/D	N/D	N/D	54	40	2231	40	645	72.9	5.07	4.8527	4.87987	4.87465	4.96288	4.96109	4.94713	4.85341	4.85303	4.87068
0.175685	0.0258619	1.01809	P13674	FALSE	Prolyl 4-hydroxylase subunit alpha-1 OS=Homo sapiens OX=9606	P4HA1	-0.0180877	N/D	N/D	N/D	30	14	313	14	534	61	6.01	0.689474	0.513046	0.508062	0.567952	0.575324	0.634762	0.512399	0.68519	0.492733
0.0811135	0.0173392	1.01209	P13693	FALSE	Translationally-controlled tumor protein OS=Homo sapiens OX=9606	TPT1	-0.0120912	N/D	N/D	N/D	73	10	1034	10	172	19.6	4.93	3.86891	3.829	3.87876	3.74695	3.89338	3.72155	3.64982	3.78844	3.60481
0.175899	0.0492813	1.03475	P13716	FALSE	Delta-aminolevulinic acid dehydratase OS=Homo sapiens OX=9606	ALAD	-0.0347493	N/D	N/D	N/D	27	8	204	8	330	36.3	6.79	-0.416727	-0.684492	-0.317003	-0.305049	-0.426604	-0.301018	-0.494084	-0.227676	-0.221046
3.2742	0.104459	1.07509	P13796	FALSE	Plastin-2 OS=Homo sapiens OX=9606	LCP1	-0.0750911	N/D	N/D	N/D	85	50	6829	46	627	70.2	5.43	7.62883	7.63724	7.63008	7.7238	7.73339	7.68979	7.60717	7.58871	7.57516
3.30008	0.1014	1.07281	P13798	FALSE	Acylamino-acid-releasing enzyme OS=Homo sapiens OX=9606	APEH	-0.0728142	N/D	N/D	N/D	31	18	525	18	732	81.2	5.48	2.66809	2.63092	2.67707	2.78985	2.75966	2.74096	2.68924	2.6368	2.67042
0.110801	0.00789595	1.00549	P13804	FALSE	Electron transfer flavoprotein subunit alpha, mitochondrial OS=Homo sapiens OX=9606	ETFA	-0.00548806	N/D	N/D	N/D	46	12	500	12	333	35.1	8.38	2.49327	2.48261	2.44277	2.52122	2.48384	2.43032	2.51641	2.42458	2.46376
5.89412	1.30009	2.46243	P13807	TRUE	Glycogen [starch] synthase, muscle OS=Homo sapiens OX=9606	GYS1	-1.46243	N/D	N/D	N/D	24	12	155	12	737	83.7	6.18	-1.0843	-0.867044	-0.941092	0.411162	0.217971	0.492199	-0.794539	-1.02577	-0.845108
2.26862	0.0871695	1.06228	P13861	FALSE	cAMP-dependent protein kinase type II-alpha regulatory subunit OS=Homo sapiens OX=9606	PRKAR2A	-0.062284	N/D	N/D	N/D	36	12	281	11	404	45.5	5.07	3.63024	3.59115	3.52342	3.66887	3.66707	3.6677	3.60426	3.56623	3.56896
1.09408	-0.188303	0.877637	P13929	FALSE	Beta-enolase OS=Homo sapiens OX=9606	ENO3	0.122363	4.14433	121.732	N/D	25	8	817	1	434	47	7.71	1.06656	1.03217	0.79571	0.727334	0.636611	0.662489	0.790538	0.815329	0.682377
0.201377	-0.0440717	0.969914	P13984	FALSE	General transcription factor IIF subunit 2 OS=Homo sapiens OX=9606	GTF2F2	0.0300863	3.49164	N/D	N/D	65	14	446	14	249	28.4	9.23	2.20197	2.1577	2.10079	2.26365	2.14724	2.18163	2.22884	2.50746	2.25272
0.299803	0.0518139	1.03657	P13987	FALSE	CD59 glycoprotein OS=Homo sapiens OX=9606	CD59	-0.0365674	N/D	N/D	N/D	25	4	153	4	128	14.2	6.48	0.330275	0.39012	0.382927	0.492703	0.340705	0.517538	0.396083	0.599184	0.292421
0.22006	-0.177734	0.88409	P13994	TRUE	Probable splicing factor YJU2B OS=Homo sapiens OX=9606	YJU2B	0.11591	4.11762	N/D	N/D	2	1	6	1	396	44.8	8.24	-5.19234	-6.07329	-4.95523	-5.3543	-6.30863	-5.53978	-5.4594	-5.66267	-5.99611
2.89917	-0.457789	0.728101	P13995	FALSE	Bifunctional methylenetetrahydrofolate dehydrogenase/cyclohydrolase, mitochondrial OS=Homo sapiens OX=9606	MTHFD2	0.271899	4.57222	4.89986	N/D	41	10	436	10	350	37.9	8.73	2.68714	2.36737	2.33478	2.11476	1.99554	2.06021	2.6406	2.50097	2.5569
0.5751	-0.022532	0.984503	P14151	FALSE	L-selectin OS=Homo sapiens OX=9606	SELL	0.0154967	3.19702	N/D	N/D	12	5	171	5	372	42.2	6.6	0.621094	0.66548	0.646196	0.631433	0.617822	0.652885	0.706792	0.659563	0.640347
2.04107	0.144762	1.10555	P14174	FALSE	Macrophage migration inhibitory factor OS=Homo sapiens OX=9606	MIF	-0.105548	N/D	N/D	N/D	43	4	681	4	115	12.5	7.88	5.88238	5.91737	5.98978	6.04674	6.17098	6.09238	6.00295	5.93603	6.02312
0.113746	-0.0761622	0.948578	P14209	TRUE	CD99 antigen OS=Homo sapiens OX=9606	CD99	0.0514223	3.73408	N/D	N/D	17	3	176	3	185	18.8	4.75	1.08035	1.66715	1.80162	1.13329	1.60874	1.05127	1.03607	1.53745	0.920944
4.27739	0.140109	1.10199	P14314	FALSE	Glucosidase 2 subunit beta OS=Homo sapiens OX=9606	PRKCSH	-0.101988	N/D	N/D	N/D	49	22	1220	22	528	59.4	4.41	4.42182	4.41522	4.44434	4.59716	4.56427	4.59145	4.48353	4.45506	4.44513
0.267996	-0.0611428	0.958505	P14316	FALSE	Interferon regulatory factor 2 OS=Homo sapiens OX=9606	IRF2	0.0414954	3.63641	N/D	N/D	4	2	39	2	349	39.3	7.52	-4.24426	-4.19165	-4.50885	-4.30359	-4.55154	-4.44818	-4.36034	-4.40051	-4.53416
0.264721	0.0253565	1.01773	P14317	TRUE	Hematopoietic lineage cell-specific protein OS=Homo sapiens OX=9606	HCLS1	-0.0177311	N/D	N/D	N/D	40	19	651	19	486	54	4.81	2.50819	2.44982	2.52276	2.53071	2.4837	2.43203	2.47203	2.426	2.36193
4.27234	0.151113	1.11043	P14324	FALSE	Farnesyl pyrophosphate synthase OS=Homo sapiens OX=9606	FDPS	-0.110426	N/D	N/D	N/D	22	7	702	7	419	48.2	6.15	4.16717	4.1382	4.16925	4.31247	4.27674	4.28469	4.14739	4.11285	4.10627
0.7445	0.354262	1.27833	P14373	FALSE	Zinc finger protein RFP OS=Homo sapiens OX=9606	TRIM27	-0.278331	N/D	N/D	N/D	14	6	129	6	513	58.5	6.21	-2.01589	-2.40682	-2.09104	-1.14308	-2.07213	-1.66452	-1.63706	-1.96677	-1.76747
2.05556	0.35085	1.27531	P14406	FALSE	Cytochrome c oxidase subunit 7A2, mitochondrial OS=Homo sapiens OX=9606	COX7A2	-0.275312	N/D	N/D	N/D	12	1	29	1	83	9.4	9.76	-0.923254	-0.844093	-0.923298	-0.701741	-0.659162	-0.712934	-1.20804	-1.19003	-1.16405
2.41646	0.0970753	1.0696	P14550	FALSE	Aldo-keto reductase family 1 member A1 OS=Homo sapiens OX=9606	AKR1A1	-0.0696029	N/D	N/D	N/D	43	11	502	10	325	36.6	6.79	1.75584	1.73793	1.74911	1.91302	1.81839	1.8645	1.79067	1.77956	1.79626
4.00748	0.133761	1.09715	P14618	FALSE	Pyruvate kinase PKM OS=Homo sapiens OX=9606	PKM	-0.0971501	N/D	N/D	N/D	76	36	5466	36	531	57.9	7.84	7.8487	7.85216	7.88406	8.0211	7.95066	7.98805	7.85816	7.83763	7.83636
0.759259	0.133159	1.09669	P14621	FALSE	Acylphosphatase-2 OS=Homo sapiens OX=9606	ACYP2	-0.0966923	N/D	N/D	N/D	39	4	52	4	99	11.1	9.5	-2.70078	-2.65144	-2.70726	-2.531	-2.58399	-2.29883	-2.60537	-2.4107	-2.55104
1.4208	0.0509257	1.03593	P14625	FALSE	Endoplasmin OS=Homo sapiens OX=9606	HSP90B1	-0.0359294	N/D	N/D	N/D	67	51	4003	41	803	92.4	4.84	6.18825	6.22838	6.25836	6.23383	6.27421	6.27486	6.17508	6.20011	6.21007
0.334475	-0.0429603	0.970661	P14635	TRUE	G2/mitotic-specific cyclin-B1 OS=Homo sapiens OX=9606	CCNB1	0.0293388	3.48038	N/D	N/D	21	8	264	8	433	48.3	7.47	1.93612	2.02315	2.01555	1.91516	2.04375	1.86978	2.00308	2.07094	1.86629
0.0547071	-0.00673246	0.995344	P14649	TRUE	Myosin light chain 6B OS=Homo sapiens OX=9606	MYL6B	0.00465572	2.67001	N/D	N/D	25	5	394	3	208	22.8	5.73	-1.12438	-1.19347	-1.16422	-1.0277	-1.19537	-1.20579	-1.13214	-1.10426	-1.09887
0.336786	0.0298546	1.02091	P14678	TRUE	Small nuclear ribonucleoprotein-associated proteins B and B' OS=Homo sapiens OX=9606	SNRPB	-0.0209092	N/D	N/D	N/D	36	10	858	1	240	24.6	11.19	-1.84834	-1.81395	-1.83145	-1.76263	-1.76636	-1.77489	-1.74004	-1.85466	-1.69845
0.268499	0.0694826	1.04934	P14735	FALSE	Insulin-degrading enzyme OS=Homo sapiens OX=9606	IDE	-0.0493403	N/D	N/D	N/D	36	33	1108	33	1019	117.9	6.61	2.40475	2.68282	2.7539	2.5506	2.55508	2.60337	2.48543	2.33225	2.34204
0.794679	0.154158	1.11277	P14854	FALSE	Cytochrome c oxidase subunit 6B1 OS=Homo sapiens OX=9606	COX6B1	-0.112772	N/D	N/D	N/D	55	6	495	6	86	10.2	7.05	1.86712	2.15663	2.2328	2.26366	2.42161	2.12141	2.06321	2.16756	2.20108
2.74789	-0.136446	0.909758	P14859	TRUE	POU domain, class 2, transcription factor 1 OS=Homo sapiens OX=9606	POU2F1	0.0902422	3.99648	N/D	N/D	12	6	106	6	743	76.4	6.81	-0.693144	-0.617525	-0.664003	-0.821887	-0.823964	-0.740692	-0.643346	-0.707533	-0.628862
1.55326	0.0610334	1.04321	P14866	FALSE	Heterogeneous nuclear ribonucleoprotein L OS=Homo sapiens OX=9606	HNRNPL	-0.0432128	N/D	N/D	N/D	73	28	1981	27	589	64.1	8.22	5.56375	5.6187	5.65621	5.6699	5.66506	5.7099	5.64415	5.6036	5.6371
5.62199	0.108662	1.07823	P14868	TRUE	Aspartate--tRNA ligase, cytoplasmic OS=Homo sapiens OX=9606	DARS1	-0.0782279	N/D	N/D	N/D	68	35	2040	35	501	57.1	6.55	5.17668	5.16618	5.17348	5.28235	5.26507	5.27693	5.17025	5.14333	5.16679
0.887302	0.0523553	1.03696	P14921	FALSE	Protein C-ets-1 OS=Homo sapiens OX=9606	ETS1	-0.0369564	N/D	N/D	N/D	30	10	248	10	441	50.4	5.19	1.08538	1.1229	1.10835	1.13624	1.14396	1.15627	0.994586	1.12819	1.11941
1.12437	0.0830169	1.05923	P14927	FALSE	Cytochrome b-c1 complex subunit 7 OS=Homo sapiens OX=9606	UQCRB	-0.0592307	N/D	N/D	N/D	34	5	155	5	111	13.5	8.78	0.0498104	0.150677	0.0879116	0.178472	0.183087	0.285952	0.158135	0.200396	0.14999
0.378962	-0.0491862	0.966481	P15056	TRUE	Serine/threonine-protein kinase B-raf OS=Homo sapiens OX=9606	BRAF	0.0335187	3.54009	N/D	N/D	17	11	246	5	766	84.4	7.53	-1.06183	-1.02682	-1.11376	-1.05131	-1.12741	-1.29068	-1.14571	-1.18283	-1.11273
0.177842	0.0171698	1.01197	P15104	FALSE	Glutamine synthetase OS=Homo sapiens OX=9606	GLUL	-0.0119723	N/D	N/D	N/D	19	8	213	8	373	42	6.89	0.216234	0.12108	0.204611	0.18163	0.189397	0.269939	0.285804	0.163294	0.187891
4.70287	0.103616	1.07446	P15121	FALSE	Aldo-keto reductase family 1 member B1 OS=Homo sapiens OX=9606	AKR1B1	-0.0744631	N/D	N/D	N/D	69	18	1198	17	316	35.8	6.98	4.45563	4.44579	4.45649	4.56461	4.55591	4.55885	4.43269	4.46351	4.48293
1.76379	0.090872	1.06501	P15153	FALSE	Ras-related C3 botulinum toxin substrate 2 OS=Homo sapiens OX=9606	RAC2	-0.0650137	N/D	N/D	N/D	41	8	880	4	192	21.4	7.61	2.03502	2.09927	2.04112	2.2254	2.17319	2.11284	2.11779	2.08889	2.09553
1.05509	-0.0739261	0.950049	P15170	TRUE	Eukaryotic peptide chain release factor GTP-binding subunit ERF3A OS=Homo sapiens OX=9606	GSPT1	0.049951	3.7208	N/D	N/D	52	24	1440	12	499	55.7	5.62	3.02762	3.06195	3.11302	2.96496	2.99187	2.89776	2.9866	2.99714	2.96641
0.388889	-0.130627	0.913434	P15260	FALSE	Interferon gamma receptor 1 OS=Homo sapiens OX=9606	IFNGR1	0.0865655	3.97667	N/D	N/D	2	1	2	1	489	54.4	4.91	-4.45477	-4.57055	-4.76991	-4.7087	-4.60314	-4.39403	-4.46354	-4.20209	-4.16712
1.56478	0.116185	1.08386	P15291	FALSE	Beta-1,4-galactosyltransferase 1 OS=Homo sapiens OX=9606	B4GALT1	-0.083865	N/D	N/D	N/D	6	2	18	2	398	43.9	8.65	-0.75296	-0.659088	-0.721642	-0.658502	-0.585914	-0.589603	-0.657142	-0.744419	-0.829897
0.25795	0.0188556	1.01316	P15311	FALSE	Ezrin OS=Homo sapiens OX=9606	EZR	-0.0131555	N/D	N/D	N/D	46	39	3031	24	586	69.4	6.27	4.89568	4.86742	4.84439	4.91903	4.84881	4.90478	4.87818	4.80754	4.93888
0.790788	0.146068	1.10655	P15336	FALSE	Cyclic AMP-dependent transcription factor ATF-2 OS=Homo sapiens OX=9606	ATF2	-0.10655	N/D	N/D	N/D	21	6	168	5	505	54.5	7.88	-1.34264	-1.07327	-1.38707	-1.11917	-1.20302	-0.937809	-1.125	-1.31322	-1.15522
2.28649	0.109557	1.0789	P15374	FALSE	Ubiquitin carboxyl-terminal hydrolase isozyme L3 OS=Homo sapiens OX=9606	UCHL3	-0.0788969	N/D	N/D	N/D	58	12	447	12	230	26.2	4.92	2.07697	2.15621	2.17003	2.23118	2.22004	2.21025	2.12197	2.06208	2.07833
1.2047	0.10408	1.07481	P15498	FALSE	Proto-oncogene vav OS=Homo sapiens OX=9606	VAV1	-0.0748088	N/D	N/D	N/D	28	21	771	20	845	98.3	6.62	1.98135	2.02845	2.13057	2.19256	2.1869	2.0901	2.14821	2.00099	2.02508
1.038	-0.26651	0.831328	P15529	FALSE	Membrane cofactor protein OS=Homo sapiens OX=9606	CD46	0.168672	4.30727	12.8593	N/D	11	4	98	4	392	43.7	6.74	-1.39286	-1.43853	-1.52987	-1.94439	-1.6038	-2.05354	-1.75384	-1.81868	-1.67061
3.75025	0.0890816	1.06369	P15531	FALSE	Nucleoside diphosphate kinase A OS=Homo sapiens OX=9606	NME1	-0.0636928	N/D	N/D	N/D	70	10	1944	5	152	17.1	6.19	4.3815	4.34418	4.38192	4.45325	4.4641	4.45004	4.3643	4.34117	4.3872
0.661628	0.0503332	1.0355	P15586	TRUE	N-acetylglucosamine-6-sulfatase OS=Homo sapiens OX=9606	GNS	-0.035504	N/D	N/D	N/D	15	8	205	8	552	62	8.31	0.12862	0.0613403	0.10671	0.195453	0.098279	0.232004	0.158303	0.10659	0.187908
0.480693	0.221021	1.16556	P15735	FALSE	Phosphorylase b kinase gamma catalytic chain, liver/testis isoform OS=Homo sapiens OX=9606	PHKG2	-0.165558	N/D	N/D	N/D	6	2	9	2	406	46.4	6.38	-3.73693	-4.41907	-3.66519	-3.68873	-3.5443	-3.69005	-3.61854	-3.55985	-4.17269
0.017626	-0.00677411	0.995316	P15812	FALSE	T-cell surface glycoprotein CD1e, membrane-associated OS=Homo sapiens OX=9606	CD1E	0.00468445	2.6727	N/D	N/D	3	1	33	1	388	43.6	8.57	-2.44633	-2.33729	-2.68862	-2.6705	-2.46528	-2.52609	-2.31899	-2.6653	-2.82657
1.24586	-0.201323	0.869753	P15814	FALSE	Immunoglobulin lambda-like polypeptide 1 OS=Homo sapiens OX=9606	IGLL1	0.130247	4.17537	48.1983	N/D	31	4	48	4	213	22.9	10.07	-2.07044	-1.98017	-2.00421	-2.28411	-2.17131	-2.32763	-2.24101	-2.19283	-1.8695
0.721202	-0.356165	0.781238	P15848	FALSE	Arylsulfatase B OS=Homo sapiens OX=9606	ARSB	0.218762	4.44719	6.97648	N/D	4	2	17	2	533	59.6	8.21	-4.46753	-4.46351	-3.923	-4.01544	-5.02544	-4.53108	-4.0912	-3.8687	-4.193
0.0213968	0.00108417	1.00075	P15880	FALSE	40S ribosomal protein S2 OS=Homo sapiens OX=9606	RPS2	-0.000751771	N/D	N/D	N/D	51	16	1596	16	293	31.3	10.24	5.61153	5.59045	5.59963	5.59367	5.59209	5.60015	5.59487	5.54174	5.62709
0.503114	-0.199523	0.870838	P15882	FALSE	N-chimaerin OS=Homo sapiens OX=9606	CHN1	0.129162	4.1712	52.5213	N/D	9	3	28	3	459	53.1	6.98	-3.16963	-3.68697	-3.13356	-3.57743	-3.49876	-3.44384	-3.67734	-2.94993	-3.2255
1.6228	0.143746	1.10477	P15923	TRUE	Transcription factor E2-alpha OS=Homo sapiens OX=9606	TCF3	-0.10477	N/D	N/D	N/D	58	18	394	16	654	67.6	6.47	1.20679	1.21576	1.21161	1.28052	1.29891	1.26449	1.09581	1.03971	1.05568
0.694253	0.046384	1.03267	P15927	FALSE	Replication protein A 32 kDa subunit OS=Homo sapiens OX=9606	RPA2	-0.0326734	N/D	N/D	N/D	40	7	381	7	270	29.2	6.15	2.44356	2.50491	2.56499	2.51356	2.60313	2.54803	2.52563	2.46478	2.54727
2.47329	0.204383	1.15219	P15954	FALSE	Cytochrome c oxidase subunit 7C, mitochondrial OS=Homo sapiens OX=9606	COX7C	-0.152194	N/D	N/D	N/D	14	1	96	1	63	7.2	10.27	-0.529816	-0.419289	-0.404079	-0.277915	-0.323062	-0.277676	-0.613418	-0.508791	-0.508213
0.994849	0.29233	1.22462	P16083	FALSE	Ribosyldihydronicotinamide dehydrogenase [quinone] OS=Homo sapiens OX=9606	NQO2	-0.224616	N/D	N/D	N/D	39	8	222	8	231	25.9	6.29	-0.106897	-0.156794	-0.0783043	0.332002	0.161616	0.31045	0.486754	-0.120811	-0.16979
0.519466	0.0726374	1.05164	P16150	FALSE	Leukosialin OS=Homo sapiens OX=9606	SPN	-0.0516374	N/D	N/D	N/D	38	8	388	8	400	40.3	5.1	2.77432	2.79884	2.82513	2.84803	2.8883	2.81724	2.81482	2.57377	2.88444
1.59142	0.112057	1.08077	P16219	FALSE	Short-chain specific acyl-CoA dehydrogenase, mitochondrial OS=Homo sapiens OX=9606	ACADS	-0.0807683	N/D	N/D	N/D	31	11	204	11	412	44.3	7.99	0.507589	0.597393	0.598013	0.70822	0.639216	0.667639	0.60378	0.45569	0.595343
0.79687	0.101353	1.07278	P16220	FALSE	Cyclic AMP-responsive element-binding protein 1 OS=Homo sapiens OX=9606	CREB1	-0.072779	N/D	N/D	N/D	18	4	161	2	327	35.1	5.27	-0.910925	-1.06855	-0.956697	-0.922402	-0.818223	-1.03168	-0.995109	-1.10224	-1.11921
0.816538	0.0990052	1.07103	P16278	TRUE	Beta-galactosidase OS=Homo sapiens OX=9606	GLB1	-0.0710347	N/D	N/D	N/D	15	7	125	7	677	76	6.57	3.65468	3.62244	3.79317	3.69009	3.76399	3.6985	3.5225	3.59016	3.52819
2.72528	0.140843	1.10255	P16284	FALSE	Platelet endothelial cell adhesion molecule OS=Homo sapiens OX=9606	PECAM1	-0.102549	N/D	N/D	N/D	26	16	342	16	738	82.5	6.99	0.598255	0.70244	0.611258	0.812383	0.732482	0.803612	0.618066	0.650358	0.671516
0.449726	0.0648685	1.04599	P16298	TRUE	Serine/threonine-protein phosphatase 2B catalytic subunit beta isoform OS=Homo sapiens OX=9606	PPP3CB	-0.0459896	N/D	N/D	N/D	15	5	121	4	524	59	5.91	-1.52844	-1.63812	-1.68802	-1.59226	-1.54446	-1.70488	-1.82556	-1.69301	-1.69927
0.114727	0.0249426	1.01744	P16333	TRUE	Cytoplasmic protein NCK1 OS=Homo sapiens OX=9606	NCK1	-0.0174392	N/D	N/D	N/D	49	19	442	16	377	42.8	6.47	1.10542	1.07913	1.14787	0.89441	1.20973	1.14383	1.00911	1.09669	0.908043
0.0150661	-0.00163221	0.998869	P16383	FALSE	Intron Large complex component GCFC2 OS=Homo sapiens OX=9606	GCFC2	0.00113072	2.05385	N/D	N/D	12	8	149	8	781	89.3	5.99	-0.696739	-0.709848	-0.780739	-0.770696	-0.762019	-0.741518	-0.827271	-0.82184	-0.702234
0.0269397	-0.00310469	0.99785	P16401	FALSE	Histone H1.5 OS=Homo sapiens OX=9606	H1-5	0.00214969	2.33331	N/D	N/D	30	9	736	7	226	22.6	10.92	4.38328	4.39999	4.3151	4.43235	4.32404	4.3983	4.34046	4.41472	4.47445
0.325934	0.0375117	1.02634	P16403	FALSE	Histone H1.2 OS=Homo sapiens OX=9606	H1-2	-0.0263421	N/D	N/D	N/D	32	9	768	1	213	21.4	10.93	1.85834	1.8968	1.74717	1.90591	1.95385	1.92057	1.91005	1.9817	1.94151
1.63576	0.0801272	1.05711	P16435	FALSE	NADPH--cytochrome P450 reductase OS=Homo sapiens OX=9606	POR	-0.0571113	N/D	N/D	N/D	31	21	562	21	677	76.6	5.58	1.67933	1.5797	1.65846	1.73239	1.76103	1.69743	1.70009	1.6509	1.63245
0.435003	0.0304945	1.02136	P16455	FALSE	Methylated-DNA--protein-cysteine methyltransferase OS=Homo sapiens OX=9606	MGMT	-0.0213622	N/D	N/D	N/D	31	6	257	6	207	21.6	8.1	0.928608	0.89299	0.903662	0.954535	0.981624	0.905228	0.866073	1.00303	0.905445
0.359739	0.0422784	1.02974	P16591	FALSE	Tyrosine-protein kinase Fer OS=Homo sapiens OX=9606	FER	-0.0297388	N/D	N/D	N/D	10	7	101	7	822	94.6	7.14	-0.0273266	0.00244331	0.0294876	-0.0131655	0.0302439	-0.0890903	-0.131864	-0.147179	-0.123257
0.665904	0.0367468	1.0258	P16615	TRUE	Sarcoplasmic/endoplasmic reticulum calcium ATPase 2 OS=Homo sapiens OX=9606	ATP2A2	-0.0257981	N/D	N/D	N/D	30	31	1685	16	1042	114.7	5.34	3.15641	3.13752	3.11463	3.13647	3.13966	3.13325	3.04319	3.05415	3.09238
0.18036	0.0242333	1.01694	P16885	TRUE	1-phosphatidylinositol 4,5-bisphosphate phosphodiesterase gamma-2 OS=Homo sapiens OX=9606	PLCG2	-0.0169391	N/D	N/D	N/D	11	13	85	13	1265	147.8	6.64	-0.0887527	-0.241203	-0.313913	-0.205022	-0.140149	-0.142206	-0.158437	-0.107862	-0.209986
1.33976	0.0684908	1.04862	P16930	FALSE	Fumarylacetoacetase OS=Homo sapiens OX=9606	FAH	-0.0486192	N/D	N/D	N/D	23	8	282	8	419	46.3	6.95	2.1236	2.13724	2.05326	2.19068	2.13449	2.14212	2.08478	2.02309	2.10166
0.949889	0.0255392	1.01786	P16949	TRUE	Stathmin OS=Homo sapiens OX=9606	STMN1	-0.0178601	N/D	N/D	N/D	62	13	1355	12	149	17.3	5.97	5.71612	5.72707	5.71089	5.73674	5.76348	5.7366	5.71692	5.69239	5.75701
0.626819	0.0267056	1.01868	P16989	TRUE	Y-box-binding protein 3 OS=Homo sapiens OX=9606	YBX3	-0.0186833	N/D	N/D	N/D	60	18	989	12	372	40.1	9.77	2.27229	2.26414	2.24812	2.2833	2.34532	2.28753	2.32666	2.28545	2.27538
0.250496	0.0444398	1.03128	P17026	FALSE	Zinc finger protein 22 OS=Homo sapiens OX=9606	ZNF22	-0.0312826	N/D	N/D	N/D	32	8	155	6	224	25.9	10.04	-0.664656	-0.536335	-0.79641	-0.579249	-0.723695	-0.723005	-0.845489	-0.708975	-0.766674
2.716	-0.171896	0.887676	P17028	FALSE	Zinc finger protein 24 OS=Homo sapiens OX=9606	ZNF24	0.112324	4.10222	N/D	N/D	27	9	217	9	368	42.1	6.21	0.0798283	0.00812912	0.113539	-0.0264616	-0.117459	-0.15424	0.0922174	0.0327168	0.108622
0.0253493	0.015141	1.01055	P17029	FALSE	Zinc finger protein with KRAB and SCAN domains 1 OS=Homo sapiens OX=9606	ZKSCAN1	-0.0105502	N/D	N/D	N/D	13	5	42	5	563	63.6	7.05	-2.9848	-2.03589	-2.66442	-2.34926	-2.59683	-2.36487	-2.43089	-2.26327	-2.33348
0.786405	0.202388	1.1506	P17050	FALSE	Alpha-N-acetylgalactosaminidase OS=Homo sapiens OX=9606	NAGA	-0.150602	N/D	N/D	N/D	13	5	81	5	411	46.5	5.19	-1.59098	-1.33475	-1.73857	-1.51766	-1.3677	-1.56953	-1.85555	-1.69297	-1.91129
3.12297	-0.453446	0.730297	P17096	TRUE	High mobility group protein HMG-I/HMG-Y OS=Homo sapiens OX=9606	HMGA1	0.269703	4.56739	4.95703	N/D	37	3	123	3	107	11.7	10.32	-0.578407	-0.579603	-0.56838	-1.05039	-0.880734	-0.898365	-0.511035	-0.423044	-0.277826
1.55405	-0.720527	0.606876	P17098	FALSE	Zinc finger protein 8 OS=Homo sapiens OX=9606	ZNF8	0.393124	4.81143	3.15004	N/D	4	2	11	2	575	64.9	7.39	-3.9328	-4.7193	-4.44527	-4.44246	-5.05002	-5.53069	-4.22346	-4.19096	-4.21138
0.157387	0.0189834	1.01325	P17152	FALSE	Transmembrane protein 11, mitochondrial OS=Homo sapiens OX=9606	TMEM11	-0.0132452	N/D	N/D	N/D	22	4	83	4	192	21.5	7.36	-1.75272	-1.83401	-1.64855	-1.76174	-1.75632	-1.69061	-1.839	-1.75342	-1.70354
0.228368	0.0386742	1.02717	P17174	FALSE	Aspartate aminotransferase, cytoplasmic OS=Homo sapiens OX=9606	GOT1	-0.0271694	N/D	N/D	N/D	44	16	641	16	413	46.2	7.01	2.86581	2.82437	2.93323	3.06632	3.02402	2.91625	3.06498	3.05768	3.03508
0.357621	0.107116	1.07707	P17252	FALSE	Protein kinase C alpha type OS=Homo sapiens OX=9606	PRKCA	-0.0770729	N/D	N/D	N/D	37	21	820	14	672	76.7	7.05	2.29194	2.68388	2.32722	2.4124	2.49518	2.33557	2.32556	2.14736	2.06765
0.842311	0.120696	1.08726	P17480	TRUE	Nucleolar transcription factor 1 OS=Homo sapiens OX=9606	UBTF	-0.0872594	N/D	N/D	N/D	11	8	128	8	764	89.4	5.81	-0.418961	-0.75466	-0.700203	-0.495431	-0.420117	-0.520929	-0.548812	-0.579866	-0.594631
0.75566	-0.200931	0.869989	P17483	FALSE	Homeobox protein Hox-B4 OS=Homo sapiens OX=9606	HOXB4	0.130011	4.17447	49.0759	N/D	6	1	1	1	251	27.6	9.77	-4.82245	-4.66442	-4.7653	-4.79599	-5.22473	-4.91281	-4.52328	-5.03312	-4.8529
0.882885	-0.507581	0.703401	P17535	TRUE	Transcription factor JunD OS=Homo sapiens OX=9606	JUND	0.296599	4.62497	4.35268	N/D	16	4	54	4	347	35.2	7.37	-1.93412	-1.30146	-0.751289	-1.96136	-1.8418	-2.20471	-2.04625	-1.2736	-1.66353
1.19957	0.0769178	1.05476	P17542	TRUE	T-cell acute lymphocytic leukemia protein 1 OS=Homo sapiens OX=9606	TAL1	-0.0547622	N/D	N/D	N/D	33	7	222	7	331	34.2	8.02	0.123131	0.0482082	0.107264	0.222112	0.125278	0.152967	0.0397978	0.0577297	0.163076
0.142041	0.0590863	1.04181	P17544	FALSE	Cyclic AMP-dependent transcription factor ATF-7 OS=Homo sapiens OX=9606	ATF7	-0.0418058	N/D	N/D	N/D	19	5	79	4	483	51.7	8	-2.6734	-2.19816	-2.43526	-2.46807	-2.26697	-2.51598	-2.23623	-2.85425	-2.45927
0.943277	0.0574581	1.04063	P17568	FALSE	NADH dehydrogenase [ubiquinone] 1 beta subcomplex subunit 7 OS=Homo sapiens OX=9606	NDUFB7	-0.0406306	N/D	N/D	N/D	28	4	166	4	137	16.4	8.92	-0.671738	-0.672543	-0.698483	-0.664468	-0.543181	-0.614656	-0.703815	-0.611122	-0.63166
0.77528	0.144047	1.105	P17612	FALSE	cAMP-dependent protein kinase catalytic subunit alpha OS=Homo sapiens OX=9606	PRKACA	-0.105001	N/D	N/D	N/D	35	13	517	4	351	40.6	8.79	-0.202562	-0.194357	0.125635	0.0101671	0.157964	0.15625	-0.0706034	-0.00195312	0.128319
1.01312	-0.154628	0.898364	P17676	TRUE	CCAAT/enhancer-binding protein beta OS=Homo sapiens OX=9606	CEBPB	0.101636	4.0536	N/D	N/D	3	1	4	1	345	36.1	8.31	-3.87503	-3.7793	-3.68146	-3.80342	-3.80981	-3.93715	-3.5771	-3.72452	-3.53558
0.0055636	-0.000526269	0.999635	P17706	FALSE	Tyrosine-protein phosphatase non-receptor type 2 OS=Homo sapiens OX=9606	PTPN2	0.000364716	1.56211	N/D	N/D	33	15	517	15	415	48.4	8.29	1.87625	2.00661	1.88406	1.90644	1.95245	1.88793	1.8943	1.93638	1.89921
0.83502	0.11615	1.08384	P17707	FALSE	S-adenosylmethionine decarboxylase proenzyme OS=Homo sapiens OX=9606	AMD1	-0.0838385	N/D	N/D	N/D	14	4	55	4	334	38.3	6	-1.80193	-1.86502	-1.7134	-1.75325	-1.75627	-1.78209	-2.03361	-1.99184	-1.87433
1.48969	0.117472	1.08483	P17812	FALSE	CTP synthase 1 OS=Homo sapiens OX=9606	CTPS1	-0.0848319	N/D	N/D	N/D	58	30	1468	30	591	66.6	6.46	4.00001	3.99711	4.00726	4.20096	4.1738	4.18151	4.14486	4.12117	4.13731
1.33011	-0.0302701	0.979237	P17844	FALSE	Probable ATP-dependent RNA helicase DDX5 OS=Homo sapiens OX=9606	DDX5	0.0207631	3.3264	N/D	N/D	51	34	4183	25	614	69.1	8.92	6.09714	6.13589	6.12099	6.09671	6.1145	6.07021	6.13396	6.13843	6.11805
0.293865	-0.0229665	0.984207	P17858	FALSE	ATP-dependent 6-phosphofructokinase, liver type OS=Homo sapiens OX=9606	PFKL	0.0157932	3.20538	N/D	N/D	23	16	553	12	780	85	7.5	1.24077	1.31725	1.38102	1.3238	1.25697	1.33592	1.35664	1.34237	1.33312
0.279907	0.0386875	1.02718	P17900	FALSE	Ganglioside GM2 activator OS=Homo sapiens OX=9606	GM2A	-0.027179	N/D	N/D	N/D	9	2	82	2	193	20.8	5.31	-1.76952	-1.62132	-1.87042	-1.6841	-1.64135	-1.69674	-1.63501	-1.71856	-1.66166
1.0817	0.0458582	1.0323	P17980	FALSE	26S proteasome regulatory subunit 6A OS=Homo sapiens OX=9606	PSMC3	-0.0322971	N/D	N/D	N/D	51	21	865	21	439	49.2	5.24	3.41468	3.47946	3.52569	3.52582	3.50475	3.51766	3.48841	3.4533	3.45976
2.64199	0.0760496	1.05413	P17987	FALSE	T-complex protein 1 subunit alpha OS=Homo sapiens OX=9606	TCP1	-0.0541277	N/D	N/D	N/D	72	32	3332	32	556	60.3	6.11	7.16216	7.13068	7.13552	7.20649	7.25881	7.2194	7.16171	7.13786	7.18516
2.72287	0.120094	1.08681	P18031	TRUE	Tyrosine-protein phosphatase non-receptor type 1 OS=Homo sapiens OX=9606	PTPN1	-0.0868053	N/D	N/D	N/D	59	26	718	26	435	49.9	6.27	3.08384	3.12378	3.09456	3.24179	3.28339	3.21299	3.15841	3.17391	3.12128
0.0314191	0.0102935	1.00716	P18065	FALSE	Insulin-like growth factor-binding protein 2 OS=Homo sapiens OX=9606	IGFBP2	-0.00716041	N/D	N/D	N/D	25	6	77	6	325	34.8	7.5	-2.164	-1.7327	-2.11005	-1.88802	-2.04193	-2.05893	-1.92979	-1.90684	-2.19612
0.793425	0.0620894	1.04398	P18074	FALSE	General transcription and DNA repair factor IIH helicase subunit XPD OS=Homo sapiens OX=9606	ERCC2	-0.0439766	N/D	N/D	N/D	21	15	225	15	760	86.9	7.15	0.404079	0.390186	0.316046	0.349034	0.487838	0.406624	0.308232	0.298864	0.397047
0.92682	0.0550726	1.03891	P18077	FALSE	60S ribosomal protein L35a OS=Homo sapiens OX=9606	RPL35A	-0.0389114	N/D	N/D	N/D	46	9	770	9	110	12.5	11.06	4.34517	4.41776	4.41364	4.39538	4.46122	4.38803	4.31002	4.34275	4.32951
1.77244	0.103581	1.07444	P18085	FALSE	ADP-ribosylation factor 4 OS=Homo sapiens OX=9606	ARF4	-0.074437	N/D	N/D	N/D	51	8	504	4	180	20.5	7.14	2.06871	2.07715	2.07907	2.19192	2.1987	2.18542	2.01833	2.10042	2.18691
0.0943543	-0.00622829	0.995692	P18124	TRUE	60S ribosomal protein L7 OS=Homo sapiens OX=9606	RPL7	0.00430781	2.63613	N/D	N/D	58	22	1693	22	248	29.2	10.65	5.7844	5.80923	5.76094	5.80578	5.8319	5.79151	5.84407	5.83414	5.86295
0.667678	-0.0227275	0.98437	P18206	TRUE	Vinculin OS=Homo sapiens OX=9606	VCL	0.0156301	3.2008	N/D	N/D	33	31	492	31	1134	123.7	5.66	1.37659	1.41921	1.37855	1.38949	1.34939	1.33852	1.36806	1.3555	1.39323
1.45016	-0.13955	0.907802	P18433	TRUE	Receptor-type tyrosine-protein phosphatase alpha OS=Homo sapiens OX=9606	PTPRA	0.0921976	4.00673	N/D	N/D	16	8	63	7	802	90.7	6.65	0.0669613	-0.0392857	0.0921097	-0.188426	-0.15451	-0.0895481	0.0430479	-0.0737381	-0.116764
1.93353	-0.0308436	0.978848	P18583	TRUE	Protein SON OS=Homo sapiens OX=9606	SON	0.0211522	3.33464	N/D	N/D	24	44	1537	44	2426	263.7	5.64	3.40138	3.39511	3.39534	3.35965	3.35618	3.3532	3.36606	3.36994	3.3953
5.63725	-0.445675	0.734241	P18615	FALSE	Negative elongation factor E OS=Homo sapiens OX=9606	NELFE	0.265759	4.55865	5.06399	4.55865	34	11	297	11	380	43.2	9.33	0.940144	0.929024	0.853052	0.486062	0.512046	0.413601	0.937566	0.962975	0.87471
1.40273	0.0549235	1.0388	P18621	TRUE	60S ribosomal protein L17 OS=Homo sapiens OX=9606	RPL17	-0.038804	N/D	N/D	N/D	47	8	635	8	184	21.4	10.17	4.84449	4.78577	4.76993	4.88005	4.82959	4.81833	4.77397	4.79136	4.76087
6.85235	0.252418	1.1912	P18669	FALSE	Phosphoglycerate mutase 1 OS=Homo sapiens OX=9606	PGAM1	-0.191202	N/D	N/D	N/D	73	16	1769	16	254	28.8	7.18	5.21847	5.19033	5.22916	5.45139	5.49177	5.45514	5.22673	5.21004	5.20737
0.0773775	0.0106289	1.00739	P18754	FALSE	Regulator of chromosome condensation OS=Homo sapiens OX=9606	RCC1	-0.00739457	N/D	N/D	N/D	60	16	702	16	421	44.9	7.52	3.31598	3.46822	3.2796	3.31982	3.42746	3.29799	3.27725	3.32864	3.35708
0.224236	0.124952	1.09047	P18846	FALSE	Cyclic AMP-dependent transcription factor ATF-1 OS=Homo sapiens OX=9606	ATF1	-0.0904711	N/D	N/D	N/D	23	3	116	1	271	29.2	8.37	-3.90734	-3.63422	-2.85476	-3.48244	-3.34018	-3.25932	-3.74647	-3.39452	-3.37628
0.316771	0.020439	1.01427	P18858	TRUE	DNA ligase 1 OS=Homo sapiens OX=9606	LIG1	-0.0142681	N/D	N/D	N/D	45	34	1410	34	919	101.7	5.62	3.56236	3.58674	3.51943	3.64755	3.57568	3.58208	3.63529	3.58524	3.59893
2.82717	0.388168	1.30873	P18859	FALSE	ATP synthase-coupling factor 6, mitochondrial OS=Homo sapiens OX=9606	ATP5PF	-0.308731	N/D	N/D	N/D	52	6	236	6	108	12.6	9.52	2.30573	2.36031	2.25207	2.81473	2.80087	2.79488	2.54348	2.4671	2.56327
0.813893	-0.09748	0.934664	P18887	TRUE	DNA repair protein XRCC1 OS=Homo sapiens OX=9606	XRCC1	0.0653358	3.8445	N/D	N/D	25	14	270	14	633	69.5	6.28	0.90523	1.03339	1.08121	0.890624	1.01168	0.862387	0.979375	1.15183	0.96323
1.17891	1.26944	2.41068	P19022	TRUE	Cadherin-2 OS=Homo sapiens OX=9606	CDH2	-1.41068	N/D	N/D	N/D	2	2	11	2	906	99.7	4.81	-5.8052	-5.95921	-5.8491	-4.40483	-3.25502	-4.91059	-6.28483	-4.5029	-4.35628
1.48945	0.0723449	1.05142	P19174	FALSE	1-phosphatidylinositol 4,5-bisphosphate phosphodiesterase gamma-1 OS=Homo sapiens OX=9606	PLCG1	-0.0514243	N/D	N/D	N/D	36	37	1157	37	1290	148.4	6.05	3.05008	3.08729	3.08426	3.17135	3.15739	3.06206	3.06122	3.01945	3.04524
0.0644569	-0.0181651	0.987488	P19256	FALSE	Lymphocyte function-associated antigen 3 OS=Homo sapiens OX=9606	CD58	0.0125122	3.1028	N/D	N/D	4	1	2	1	250	28.1	6.76	-3.63468	-3.39573	-3.60101	-3.6905	-3.5968	-3.72924	-3.84838	-3.63277	-3.81152
0.127625	0.0136313	1.00949	P19338	FALSE	Nucleolin OS=Homo sapiens OX=9606	NCL	-0.00949331	N/D	N/D	N/D	50	38	4942	38	710	76.6	4.7	7.77983	7.73453	7.71225	7.63758	7.80486	7.81059	7.71657	7.7235	7.75757
0.860332	0.0742272	1.0528	P19367	FALSE	Hexokinase-1 OS=Homo sapiens OX=9606	HK1	-0.0527969	N/D	N/D	N/D	29	26	857	22	917	102.4	6.8	2.36402	2.45693	2.45457	2.53067	2.55564	2.58507	2.53451	2.53026	2.55712
0.867245	0.0670495	1.04757	P19387	FALSE	DNA-directed RNA polymerase II subunit RPB3 OS=Homo sapiens OX=9606	POLR2C	-0.0475721	N/D	N/D	N/D	32	8	184	8	275	31.4	4.92	0.714073	0.822027	0.760525	0.89346	0.88063	0.83955	0.871913	0.780891	0.875553
0.308572	-0.0178545	0.9877	P19388	FALSE	DNA-directed RNA polymerases I, II, and III subunit RPABC1 OS=Homo sapiens OX=9606	POLR2E	0.0122996	3.09526	N/D	N/D	32	7	265	7	210	24.5	5.95	2.2966	2.25228	2.20306	2.22272	2.20444	2.27455	2.26262	2.22256	2.27342
0.86077	-0.192537	0.875065	P19404	FALSE	NADH dehydrogenase [ubiquinone] flavoprotein 2, mitochondrial OS=Homo sapiens OX=9606	NDUFV2	0.124935	4.15464	81.063	N/D	39	8	181	8	249	27.4	8.06	0.201431	0.21101	0.251724	0.100013	-0.0359354	-0.0986061	-0.169431	0.362295	0.229136
0.565449	-0.109976	0.926603	P19447	FALSE	General transcription and DNA repair factor IIH helicase subunit XPB OS=Homo sapiens OX=9606	ERCC3	0.0733965	3.89878	N/D	N/D	24	14	177	14	782	89.2	7.23	-0.341333	-0.0962009	-0.335043	-0.386004	-0.371661	-0.358885	-0.484937	-0.0936947	-0.222036
1.09951	0.0984658	1.07063	P19474	FALSE	E3 ubiquitin-protein ligase TRIM21 OS=Homo sapiens OX=9606	TRIM21	-0.0706343	N/D	N/D	N/D	22	10	152	10	475	54.1	6.38	-0.212315	-0.220678	-0.158897	-0.140553	-0.0984907	-0.0353699	-0.142938	-0.306711	-0.0980835
1.84759	0.102936	1.07396	P19525	FALSE	Interferon-induced, double-stranded RNA-activated protein kinase OS=Homo sapiens OX=9606	EIF2AK2	-0.073957	N/D	N/D	N/D	21	12	337	12	551	62.1	8.4	1.50381	1.442	1.51141	1.61264	1.58421	1.53655	1.4202	1.43756	1.53419
0.565741	0.0978462	1.07017	P19623	FALSE	Spermidine synthase OS=Homo sapiens OX=9606	SRM	-0.0701746	N/D	N/D	N/D	66	14	558	14	302	33.8	5.49	3.27397	3.50586	3.44586	3.3675	3.48522	3.39152	3.15926	3.27482	3.24163
1.07569	0.297364	1.2289	P19634	FALSE	Sodium/hydrogen exchanger 1 OS=Homo sapiens OX=9606	SLC9A1	-0.228897	N/D	N/D	N/D	3	2	13	2	815	90.7	7.21	-4.259	-4.39892	-4.20579	-3.8883	-4.00021	-4.01814	-4.66644	-3.97896	-4.08838
1.53763	0.104264	1.07495	P19784	FALSE	Casein kinase II subunit alpha' OS=Homo sapiens OX=9606	CSNK2A2	-0.0749459	N/D	N/D	N/D	62	18	468	17	350	41.2	8.56	3.223	3.17537	3.07764	3.23477	3.30514	3.2401	3.11428	3.12752	3.21662
0.103855	-0.0475281	0.967593	P19793	FALSE	Retinoic acid receptor RXR-alpha OS=Homo sapiens OX=9606	RXRA	0.0324072	3.52495	N/D	N/D	13	6	53	4	462	50.8	7.8	-3.73813	-3.71059	-3.56262	-3.74596	-3.9564	-3.8601	-3.53368	-4.14776	-4.14696
0.171891	-0.0616638	0.958158	P19823	FALSE	Inter-alpha-trypsin inhibitor heavy chain H2 OS=Homo sapiens OX=9606	ITIH2	0.0418415	3.64017	N/D	N/D	2	1	1	1	946	106.4	6.86	-5.46956	-5.51382	-5.33444	-5.33693	-5.77042	-5.28675	-5.1042	-5.54621	-5.44999
0.640026	0.0912433	1.06529	P19838	FALSE	Nuclear factor NF-kappa-B p105 subunit OS=Homo sapiens OX=9606	NFKB1	-0.0652878	N/D	N/D	N/D	25	18	425	18	968	105.3	5.4	1.0469	1.2918	1.11514	1.31048	1.19312	1.21178	1.27018	1.11784	1.04144
2.3887	-0.147687	0.902696	P20020	TRUE	Plasma membrane calcium-transporting ATPase 1 OS=Homo sapiens OX=9606	ATP2B1	0.0973037	4.03259	N/D	N/D	19	18	350	8	1220	134.6	5.91	0.650454	0.623825	0.621614	0.418359	0.471328	0.55369	0.669883	0.651426	0.555676
2.91235	0.0442513	1.03115	P20042	FALSE	Eukaryotic translation initiation factor 2 subunit 2 OS=Homo sapiens OX=9606	EIF2S2	-0.0311479	N/D	N/D	N/D	63	27	1512	27	333	38.4	5.8	4.18394	4.19779	4.20384	4.24048	4.25736	4.239	4.21273	4.19228	4.21758
1.38421	0.0891623	1.06375	P20073	FALSE	Annexin A7 OS=Homo sapiens OX=9606	ANXA7	-0.0637524	N/D	N/D	N/D	28	15	545	15	488	52.7	5.68	2.13578	2.21079	2.1694	2.2303	2.1914	2.2247	2.04776	2.09356	2.10052
1.61934	-0.1716	0.887858	P20226	FALSE	TATA-box-binding protein OS=Homo sapiens OX=9606	TBP	0.112142	4.10143	N/D	N/D	6	2	37	2	339	37.7	9.79	-1.60255	-1.71738	-1.66908	-1.88604	-1.92089	-1.91229	-1.73991	-1.89079	-1.78914
1.32216	-0.202212	0.869217	P20248	FALSE	Cyclin-A2 OS=Homo sapiens OX=9606	CCNA2	0.130783	4.17742	46.321	N/D	15	5	51	5	432	48.5	6.54	-1.49698	-1.40781	-1.42537	-1.72212	-1.77359	-1.73546	-1.56082	-1.79436	-1.56372
0.346287	-0.053103	0.963861	P20290	FALSE	Transcription factor BTF3 OS=Homo sapiens OX=9606	BTF3	0.036139	3.57396	N/D	N/D	65	11	711	11	206	22.2	9.38	4.08934	4.28029	4.22691	4.1798	3.98446	4.11997	4.16408	4.06318	4.06328
0.230426	-0.0375009	0.974341	P20336	FALSE	Ras-related protein Rab-3A OS=Homo sapiens OX=9606	RAB3A	0.0256587	3.42052	N/D	N/D	21	4	423	3	220	25	5.03	-0.625456	-0.725618	-0.719549	-0.611892	-0.846652	-0.865974	-0.811215	-0.786339	-0.755854
0.682059	0.0475574	1.03351	P20338	FALSE	Ras-related protein Rab-4A OS=Homo sapiens OX=9606	RAB4A	-0.0335136	N/D	N/D	N/D	26	6	459	4	218	24.4	6.07	-1.39857	-1.39118	-1.33649	-1.42181	-1.26994	-1.2953	-1.35424	-1.38308	-1.39588
0.0724175	-0.00898345	0.993792	P20339	TRUE	Ras-related protein Rab-5A OS=Homo sapiens OX=9606	RAB5A	0.00620751	2.79562	N/D	N/D	33	6	411	3	215	23.6	8.15	-0.452101	-0.544626	-0.496056	-0.552642	-0.597114	-0.423937	-0.502563	-0.59446	-0.503679
3.02119	0.130815	1.09491	P20340	FALSE	Ras-related protein Rab-6A OS=Homo sapiens OX=9606	RAB6A	-0.0949118	N/D	N/D	N/D	47	13	653	9	208	23.6	5.54	1.7447	1.69406	1.65424	1.86807	1.85955	1.80381	1.72622	1.72258	1.73616
1.05714	0.083358	1.05948	P20618	FALSE	Proteasome subunit beta type-1 OS=Homo sapiens OX=9606	PSMB1	-0.0594812	N/D	N/D	N/D	51	11	787	11	241	26.5	8.13	4.09226	4.11634	4.03579	4.13143	4.25377	4.1721	4.04336	4.18887	4.13782
6.27268	0.301201	1.23217	P20645	FALSE	Cation-dependent mannose-6-phosphate receptor OS=Homo sapiens OX=9606	M6PR	-0.232169	N/D	N/D	N/D	19	6	191	6	277	31	5.83	2.36386	2.35328	2.38798	2.64505	2.66628	2.71891	2.39595	2.36726	2.38495
1.14761	0.105584	1.07593	P20674	FALSE	Cytochrome c oxidase subunit 5A, mitochondrial OS=Homo sapiens OX=9606	COX5A	-0.0759301	N/D	N/D	N/D	18	3	150	3	150	16.8	6.79	1.95946	2.06384	2.04835	1.99534	2.18742	2.10135	1.94168	1.92746	1.99391
9.39463	-0.37163	0.772909	P20700	TRUE	Lamin-B1 OS=Homo sapiens OX=9606	LMNB1	0.227091	4.46807	6.51838	4.46807	68	49	3912	45	586	66.4	5.16	6.08982	6.06931	6.06171	5.71441	5.70575	5.69206	6.08445	6.06968	6.07923
1.50387	0.169376	1.12457	P20701	FALSE	Integrin alpha-L OS=Homo sapiens OX=9606	ITGAL	-0.124572	N/D	N/D	N/D	21	18	391	18	1170	128.7	5.63	1.64402	1.44779	1.66963	1.76458	1.79588	1.74402	1.73713	1.54363	1.55051
3.44631	-1.08618	0.471008	P20810	TRUE	Calpastatin OS=Homo sapiens OX=9606	CAST	0.528992	5.05042	2.40354	5.05042	3	2	3	2	708	76.5	5.07	-4.04129	-4.24098	-3.93494	-4.83461	-5.43272	-5.47629	-4.09573	-4.40077	-4.25646
3.12029	0.166968	1.1227	P20839	FALSE	Inosine-5'-monophosphate dehydrogenase 1 OS=Homo sapiens OX=9606	IMPDH1	-0.122696	N/D	N/D	N/D	43	19	751	16	514	55.4	6.9	2.86572	2.82824	2.80936	2.94936	2.9694	3.00213	2.72564	2.81525	2.79574
0.489212	-0.260283	0.834924	P20929	FALSE	Nebulin OS=Homo sapiens OX=9606	NEB	0.165076	4.29604	13.7559	N/D	1	2	22	2	6669	772.4	9.07	-1.86396	-1.09615	-1.8322	-1.49437	-1.94618	-1.5274	-1.4456	-1.07356	-1.06275
0.0181565	-0.00659831	0.995437	P20936	FALSE	Ras GTPase-activating protein 1 OS=Homo sapiens OX=9606	RASA1	0.00456316	2.66125	N/D	N/D	7	7	48	7	1047	116.3	6.54	-1.37741	-1.58278	-1.64852	-1.54521	-1.46833	-1.71125	-1.39179	-1.51368	-1.89582
0.526105	0.0569065	1.04023	P20962	FALSE	Parathymosin OS=Homo sapiens OX=9606	PTMS	-0.0402329	N/D	N/D	N/D	24	3	78	3	102	11.5	4.16	-0.663031	-0.667927	-0.656799	-0.702975	-0.671422	-0.653685	-0.798955	-0.854475	-0.756416
0.759291	-0.138454	0.908492	P20963	FALSE	T-cell surface glycoprotein CD3 zeta chain OS=Homo sapiens OX=9606	CD247	0.0915078	4.00314	N/D	N/D	51	8	361	8	164	18.7	9.25	1.10296	0.96307	0.946728	0.81569	0.978873	0.675549	1.09326	0.820869	0.844067
0.421426	-0.086404	0.941867	P21127	TRUE	Cyclin-dependent kinase 11B OS=Homo sapiens OX=9606	CDK11B	0.0581325	3.79043	N/D	N/D	30	25	732	25	795	92.6	5.54	2.33389	2.60872	2.70615	2.35664	2.5063	2.34607	2.3992	2.4934	2.39507
1.98305	0.10681	1.07684	P21266	FALSE	Glutathione S-transferase Mu 3 OS=Homo sapiens OX=9606	GSTM3	-0.0768446	N/D	N/D	N/D	43	11	233	9	225	26.5	5.54	-0.593649	-0.663364	-0.588869	-0.52378	-0.46277	-0.449932	-0.578418	-0.562607	-0.526917
0.0499412	-0.00677188	0.995317	P21281	FALSE	V-type proton ATPase subunit B, brain isoform OS=Homo sapiens OX=9606	ATP6V1B2	0.00468291	2.67255	N/D	N/D	33	16	720	16	511	56.5	5.81	2.95041	2.89527	2.90482	2.99518	2.98704	2.78304	2.9488	2.95095	2.9209
1.4838	0.0903157	1.0646	P21283	FALSE	V-type proton ATPase subunit C 1 OS=Homo sapiens OX=9606	ATP6V1C1	-0.0646031	N/D	N/D	N/D	31	14	368	14	382	43.9	7.46	2.26101	2.3713	2.32661	2.38962	2.37683	2.36095	2.22464	2.23643	2.29292
0.21429	-0.0157348	0.989153	P21291	FALSE	Cysteine and glycine-rich protein 1 OS=Homo sapiens OX=9606	CSRP1	0.0108473	3.04006	N/D	N/D	59	9	303	9	193	20.6	8.57	1.69851	1.66821	1.64143	1.67292	1.56761	1.63746	1.60152	1.6218	1.61893
1.51622	0.0300288	1.02103	P21333	TRUE	Filamin-A OS=Homo sapiens OX=9606	FLNA	-0.0210325	N/D	N/D	N/D	54	119	6536	107	2647	280.6	6.06	6.75004	6.73468	6.73108	6.78073	6.75904	6.73888	6.72211	6.71098	6.72824
1.98188	0.113431	1.0818	P21359	FALSE	Neurofibromin OS=Homo sapiens OX=9606	NF1	-0.0817975	N/D	N/D	N/D	5	10	93	10	2839	319.2	7.39	0.626862	0.533865	0.58189	0.654979	0.668168	0.67943	0.518546	0.477255	0.586153
1.0116	-0.159235	0.8955	P21399	FALSE	Cytoplasmic aconitate hydratase OS=Homo sapiens OX=9606	ACO1	0.1045	4.06705	N/D	N/D	22	18	578	18	889	98.3	6.68	2.80409	2.76418	2.87807	2.56899	2.50892	2.5266	2.57808	2.57208	2.56792
0.933385	-0.193346	0.874575	P21675	TRUE	Transcription initiation factor TFIID subunit 1 OS=Homo sapiens OX=9606	TAF1	0.125425	4.15659	76.2278	N/D	1	2	15	2	1872	212.5	5.07	-3.60183	-3.40038	-3.71209	-3.6736	-3.53663	-3.85426	-3.39278	-3.54585	-3.31598
0.437086	0.0223012	1.01558	P21796	FALSE	Voltage-dependent anion-selective channel protein 1 OS=Homo sapiens OX=9606	VDAC1	-0.0155781	N/D	N/D	N/D	78	20	1627	19	283	30.8	8.54	5.84738	5.83195	5.77913	5.89544	5.83139	5.80972	5.84468	5.80489	5.83128
0.140163	-0.0882796	0.940644	P21802	FALSE	Fibroblast growth factor receptor 2 OS=Homo sapiens OX=9606	FGFR2	0.0593562	3.80004	N/D	N/D	2	2	254	1	821	92	5.88	-5.05889	-4.53861	-5.07291	-4.42117	-4.91256	-5.26713	-4.43502	-5.01395	-4.55266
0.461656	0.0402904	1.02832	P21912	FALSE	Succinate dehydrogenase [ubiquinone] iron-sulfur subunit, mitochondrial OS=Homo sapiens OX=9606	SDHB	-0.0283208	N/D	N/D	N/D	55	16	472	15	280	31.6	8.76	2.25654	2.21096	2.1514	2.27064	2.17483	2.33945	2.26185	2.24165	2.2057
0.345754	-0.0847249	0.942964	P21953	FALSE	2-oxoisovalerate dehydrogenase subunit beta, mitochondrial OS=Homo sapiens OX=9606	BCKDHB	0.0570357	3.78165	N/D	N/D	19	5	135	5	392	43.1	6.29	-0.430367	-0.282366	-0.149191	-0.312032	-0.321029	-0.391747	-0.494691	-0.113939	-0.0707111
0.368349	0.168783	1.12411	P21964	FALSE	Catechol O-methyltransferase OS=Homo sapiens OX=9606	COMT	-0.12411	N/D	N/D	N/D	25	5	100	5	271	30	5.47	-0.612953	-0.0688934	-0.826771	-0.0161886	-0.673656	-0.478916	-0.614766	-0.691238	-0.535597
0.898689	-0.111323	0.925739	P22033	FALSE	Methylmalonyl-CoA mutase, mitochondrial OS=Homo sapiens OX=9606	MMUT	0.0742614	3.90427	N/D	N/D	23	13	260	13	750	83.1	6.93	0.920296	0.781574	0.901705	0.662946	0.64507	0.736734	0.733989	0.648851	0.771025
0.444685	-0.0337647	0.976868	P22059	FALSE	Oxysterol-binding protein 1 OS=Homo sapiens OX=9606	OSBP	0.0231321	3.37438	N/D	N/D	27	20	482	18	807	89.4	7.3	1.88227	1.98249	1.994	1.84148	1.92096	1.92175	1.91565	1.87603	1.92051
2.88095	0.111051	1.08001	P22061	FALSE	Protein-L-isoaspartate(D-aspartate) O-methyltransferase OS=Homo sapiens OX=9606	PCMT1	-0.0800146	N/D	N/D	N/D	23	7	446	7	227	24.6	7.21	2.12977	2.15144	2.20437	2.25992	2.29991	2.30546	2.21594	2.17533	2.18742
2.80555	0.123958	1.08972	P22087	FALSE	rRNA 2'-O-methyltransferase fibrillarin OS=Homo sapiens OX=9606	FBL	-0.0897202	N/D	N/D	N/D	59	19	687	19	321	33.8	10.18	3.52887	3.50969	3.45435	3.64863	3.61389	3.56358	3.46523	3.49622	3.45408
1.46275	0.10576	1.07606	P22090	FALSE	40S ribosomal protein S4, Y isoform 1 OS=Homo sapiens OX=9606	RPS4Y1	-0.0760614	N/D	N/D	N/D	46	14	1677	7	263	29.4	10.24	1.10368	1.11805	1.07871	1.26295	1.27751	1.21731	1.18972	1.13639	1.25443
3.73469	0.127755	1.09259	P22102	FALSE	Trifunctional purine biosynthetic protein adenosine-3 OS=Homo sapiens OX=9606	GART	-0.0925924	N/D	N/D	N/D	53	44	2208	44	1010	107.7	6.7	5.08313	5.03849	5.04827	5.18894	5.21115	5.16757	5.10304	5.05901	5.03687
0.436303	0.0308162	1.02159	P22234	FALSE	Multifunctional protein ADE2 OS=Homo sapiens OX=9606	PAICS	-0.0215899	N/D	N/D	N/D	57	24	1803	24	425	47	7.23	5.88139	5.94415	5.97943	5.95236	5.9861	5.92178	5.94292	5.94241	5.84529
1.91098	0.0750184	1.05337	P22307	FALSE	Sterol carrier protein 2 OS=Homo sapiens OX=9606	SCP2	-0.0533745	N/D	N/D	N/D	32	16	525	16	547	59	6.89	2.99643	3.00321	2.9073	3.03321	3.04231	3.04234	2.9441	2.94792	2.98664
3.10062	0.104477	1.0751	P22314	FALSE	Ubiquitin-like modifier-activating enzyme 1 OS=Homo sapiens OX=9606	UBA1	-0.0751044	N/D	N/D	N/D	60	48	2718	48	1058	117.8	5.76	5.96841	5.9391	5.96337	6.07081	6.0745	6.03867	5.98589	5.90837	5.97595
0.855932	0.195829	1.14538	P22392	FALSE	Nucleoside diphosphate kinase B OS=Homo sapiens OX=9606	NME2	-0.145382	N/D	N/D	N/D	84	13	2280	8	152	17.3	8.41	4.73762	4.65741	4.72633	4.80472	4.8219	4.80112	4.82114	4.36204	4.37598
0.0875364	0.0177067	1.01235	P22415	TRUE	Upstream stimulatory factor 1 OS=Homo sapiens OX=9606	USF1	-0.012349	N/D	N/D	N/D	13	4	97	3	310	33.5	5.54	-2.92775	-2.87196	-2.816	-2.87723	-2.91111	-2.75675	-2.88904	-2.67915	-3.0125
0.448421	-0.148181	0.902387	P22570	FALSE	NADPH:adrenodoxin oxidoreductase, mitochondrial OS=Homo sapiens OX=9606	FDXR	0.0976126	4.03411	N/D	N/D	29	13	178	13	491	53.8	8.44	-0.0486069	0.0537834	-0.0783749	-0.398902	0.000325203	-0.362247	-0.342862	0.148539	-0.36504
0.695572	-0.0224722	0.984544	P22626	FALSE	Heterogeneous nuclear ribonucleoproteins A2/B1 OS=Homo sapiens OX=9606	HNRNPA2B1	0.0154559	3.19586	N/D	N/D	76	34	5934	29	353	37.4	8.95	7.83899	7.84632	7.86698	7.80036	7.84636	7.79394	7.83275	7.81439	7.81671
0.0972559	-0.0178498	0.987704	P22670	TRUE	MHC class II regulatory factor RFX1 OS=Homo sapiens OX=9606	RFX1	0.0122963	3.09515	N/D	N/D	18	12	178	10	979	104.7	6.29	-0.629374	-0.455648	-0.491373	-0.509076	-0.662757	-0.375814	-0.469617	-0.444637	-0.497547
8.23436	-2.48381	0.178772	P22681	TRUE	E3 ubiquitin-protein ligase CBL OS=Homo sapiens OX=9606	CBL	0.821228	5.66216	1.73406	5.66216	30	17	308	17	906	99.6	6.54	1.03285	1.01796	0.988573	-1.54253	-1.54512	-1.54131	1.03415	0.736578	0.834785
0.460897	0.082692	1.05899	P22694	FALSE	cAMP-dependent protein kinase catalytic subunit beta OS=Homo sapiens OX=9606	PRKACB	-0.0589922	N/D	N/D	N/D	26	12	463	3	351	40.6	8.78	-1.88619	-2.20405	-2.05271	-2.01175	-2.03497	-1.86654	-2.14598	-2.10416	-1.92957
1.67637	0.0722044	1.05132	P22695	FALSE	Cytochrome b-c1 complex subunit 2, mitochondrial OS=Homo sapiens OX=9606	UQCRC2	-0.0513219	N/D	N/D	N/D	37	15	713	15	453	48.4	8.63	3.69109	3.68064	3.67629	3.73006	3.74672	3.70838	3.6254	3.59165	3.67202
4.65392	-0.138346	0.90856	P22830	FALSE	Ferrochelatase, mitochondrial OS=Homo sapiens OX=9606	FECH	0.0914397	4.00278	N/D	N/D	41	14	446	14	423	47.8	8.73	1.58705	1.52994	1.54151	1.39801	1.40825	1.42544	1.561	1.53345	1.54051
0.217967	0.0618482	1.0438	P22897	TRUE	Macrophage mannose receptor 1 OS=Homo sapiens OX=9606	MRC1	-0.0438021	N/D	N/D	N/D	1	1	12	1	1456	165.9	6.54	-3.19771	-3.46375	-3.32386	-3.3017	-3.12465	-3.07997	-2.96175	-3.12124	-3.31541
0.292767	0.0905903	1.06481	P23025	FALSE	DNA repair protein complementing XP-A cells OS=Homo sapiens OX=9606	XPA	-0.0648058	N/D	N/D	N/D	7	1	3	1	273	31.3	6.73	-4.81548	-5.06895	-5.30768	-4.92246	-4.7556	-4.8886	-4.79192	-4.75717	-4.93564
0.178841	-0.00778945	0.994615	P23193	FALSE	Transcription elongation factor A protein 1 OS=Homo sapiens OX=9606	TCEA1	0.00538469	2.73351	N/D	N/D	50	17	562	17	301	33.9	8.38	2.77646	2.73395	2.71081	2.71555	2.70759	2.72422	2.71035	2.70787	2.70202
5.72817	-0.19894	0.87119	P23246	TRUE	Splicing factor, proline- and glutamine-rich OS=Homo sapiens OX=9606	SFPQ	0.12881	4.16984	54.0971	N/D	45	31	2266	30	707	76.1	9.44	6.40517	6.36216	6.34765	6.17001	6.16607	6.15867	6.35739	6.34032	6.37048
0.889168	-0.0711544	0.951876	P23258	FALSE	Tubulin gamma-1 chain OS=Homo sapiens OX=9606	TUBG1	0.048124	3.70378	N/D	N/D	46	18	584	18	451	51.1	6.14	2.70584	2.60833	2.75693	2.65166	2.63665	2.66493	2.80649	2.69675	2.75908
2.43831	0.102773	1.07384	P23284	FALSE	Peptidyl-prolyl cis-trans isomerase B OS=Homo sapiens OX=9606	PPIB	-0.0738352	N/D	N/D	N/D	58	15	1606	15	216	23.7	9.41	4.56136	4.57851	4.61532	4.71751	4.73864	4.69411	4.6329	4.63409	4.66173
2.81294	0.0663196	1.04704	P23368	FALSE	NAD-dependent malic enzyme, mitochondrial OS=Homo sapiens OX=9606	ME2	-0.0470422	N/D	N/D	N/D	41	21	1017	21	584	65.4	7.61	3.99344	3.96968	3.9823	4.04946	4.04658	4.01101	3.96392	3.94235	3.9645
1.10733	0.0712317	1.05061	P23381	FALSE	Tryptophan--tRNA ligase, cytoplasmic OS=Homo sapiens OX=9606	WARS1	-0.0506132	N/D	N/D	N/D	39	14	567	14	471	53.1	6.23	2.09062	2.07018	2.04259	2.15953	2.19844	2.07599	2.09949	2.0101	2.12753
1.52016	-0.119007	0.920821	P23396	TRUE	40S ribosomal protein S3 OS=Homo sapiens OX=9606	RPS3	0.0791787	3.93443	N/D	N/D	84	23	2990	23	243	26.7	9.66	6.61452	6.60322	6.60411	6.42277	6.47453	6.38372	6.4836	6.47439	6.49624
0.499078	0.0745098	1.053	P23434	FALSE	Glycine cleavage system H protein, mitochondrial OS=Homo sapiens OX=9606	GCSH	-0.0530032	N/D	N/D	N/D	11	2	91	2	173	18.9	4.88	-0.68367	-0.680811	-0.791842	-0.520076	-0.560189	-0.560095	-0.500421	-0.533865	-0.53717
0.455419	0.0944317	1.06764	P23443	TRUE	Ribosomal protein S6 kinase beta-1 OS=Homo sapiens OX=9606	RPS6KB1	-0.0676448	N/D	N/D	N/D	15	8	205	7	525	59.1	6.65	0.171638	0.35528	0.30801	0.448598	0.364896	0.320623	0.0653963	0.293434	0.507885
1.03755	-0.185936	0.879079	P23458	FALSE	Tyrosine-protein kinase JAK1 OS=Homo sapiens OX=9606	JAK1	0.120921	4.13848	169.769	N/D	9	9	60	8	1154	133.2	7.55	-2.43967	-2.4101	-2.31557	-2.54272	-2.76652	-2.6706	-2.7321	-2.42503	-2.52159
0.124815	-0.0704443	0.952345	P23469	TRUE	Receptor-type tyrosine-protein phosphatase epsilon OS=Homo sapiens OX=9606	PTPRE	0.0476553	3.69932	N/D	N/D	5	3	22	2	700	80.6	7.02	-3.97882	-4.38433	-4.54182	-3.9896	-4.31864	-4.50078	-3.96197	-4.51082	-3.8176
1.3633	-0.376356	0.770381	P23497	TRUE	Nuclear autoantigen Sp-100 OS=Homo sapiens OX=9606	SP100	0.229619	4.4743	6.39278	N/D	20	13	490	7	879	100.4	8.22	-1.97407	-2.06531	-1.86518	-2.05147	-2.72535	-2.38723	-2.26023	-2.00507	-1.9001
0.0809753	-0.0153047	0.989448	P23511	FALSE	Nuclear transcription factor Y subunit alpha OS=Homo sapiens OX=9606	NFYA	0.0105524	3.02796	N/D	N/D	7	2	65	2	347	36.9	8.94	-1.39669	-1.18579	-1.22772	-1.35399	-1.31232	-1.39435	-1.33658	-1.47622	-1.4065
1.714	0.0337265	1.02365	P23526	FALSE	Adenosylhomocysteinase OS=Homo sapiens OX=9606	AHCY	-0.0236528	N/D	N/D	N/D	51	27	1908	25	432	47.7	6.34	5.27209	5.27315	5.27591	5.29804	5.30354	5.29334	5.25327	5.23229	5.28078
2.36962	0.0404693	1.02845	P23528	FALSE	Cofilin-1 OS=Homo sapiens OX=9606	CFL1	-0.0284483	N/D	N/D	N/D	86	22	2697	17	166	18.5	8.09	6.63838	6.65814	6.62684	6.70222	6.69273	6.67254	6.65887	6.65753	6.65241
0.767038	-0.0400592	0.972615	P23588	TRUE	Eukaryotic translation initiation factor 4B OS=Homo sapiens OX=9606	EIF4B	0.027385	3.44957	N/D	N/D	47	30	1445	30	611	69.1	5.73	3.66496	3.66746	3.6155	3.64582	3.59967	3.6528	3.73194	3.70147	3.6556
1.12373	0.201698	1.15005	P23610	FALSE	40-kDa huntingtin-associated protein OS=Homo sapiens OX=9606	F8A1	-0.150051	N/D	N/D	N/D	7	2	33	2	371	39.1	6.84	-3.57078	-3.89185	-3.74824	-3.54648	-3.64587	-3.68489	-3.8185	-3.91878	-4.01652
0.113572	0.0050683	1.00352	P23634	FALSE	Plasma membrane calcium-transporting ATPase 4 OS=Homo sapiens OX=9606	ATP2B4	-0.00351926	N/D	N/D	N/D	24	24	600	14	1241	137.8	6.6	1.02487	0.991976	1.0365	1.05229	1.02671	0.999239	1.04817	1.02797	0.996576
0.599064	0.0176628	1.01232	P23743	FALSE	Diacylglycerol kinase alpha OS=Homo sapiens OX=9606	DGKA	-0.0123182	N/D	N/D	N/D	32	21	646	21	735	82.6	6.73	2.35674	2.37479	2.3868	2.39747	2.38924	2.35527	2.37486	2.34797	2.3368
0.509747	0.0500878	1.03533	P23786	TRUE	Carnitine O-palmitoyltransferase 2, mitochondrial OS=Homo sapiens OX=9606	CPT2	-0.0353279	N/D	N/D	N/D	36	19	447	19	658	73.7	8.18	1.25243	1.26583	1.24115	1.21414	1.35294	1.24986	1.28281	1.1565	1.13464
1.92237	0.0768568	1.05472	P23919	FALSE	Thymidylate kinase OS=Homo sapiens OX=9606	DTYMK	-0.0547176	N/D	N/D	N/D	67	16	722	16	212	23.8	8.27	3.34713	3.29282	3.33929	3.4501	3.35292	3.38694	3.30781	3.30176	3.32995
1.83561	0.0709949	1.05044	P23921	FALSE	Ribonucleoside-diphosphate reductase large subunit OS=Homo sapiens OX=9606	RRM1	-0.0504408	N/D	N/D	N/D	38	29	1329	29	792	90	7.15	3.8986	3.93008	3.91709	3.94247	3.95513	3.99837	3.89503	3.88753	3.83762
0.0392091	0.0119179	1.0083	P24386	FALSE	Rab proteins geranylgeranyltransferase component A 1 OS=Homo sapiens OX=9606	CHM	-0.00829508	N/D	N/D	N/D	15	8	98	6	653	73.4	4.75	-1.52168	-1.57571	-1.96383	-1.57225	-1.80451	-1.60851	-1.63747	-1.60843	-1.73494
1.72424	-0.0960088	0.935618	P24534	FALSE	Elongation factor 1-beta OS=Homo sapiens OX=9606	EEF1B2	0.0643822	3.83767	N/D	N/D	74	15	1188	11	225	24.7	4.67	5.06306	5.02294	5.01737	4.96313	4.91969	4.989	5.13977	5.01296	5.0636
2.64583	0.0629172	1.04458	P24539	FALSE	ATP synthase F(0) complex subunit B1, mitochondrial OS=Homo sapiens OX=9606	ATP5PB	-0.0445758	N/D	N/D	N/D	39	12	921	12	256	28.9	9.36	3.58292	3.58113	3.58134	3.63868	3.64497	3.63388	3.54306	3.56074	3.60838
0.888012	-0.0518492	0.964699	P24666	FALSE	Low molecular weight phosphotyrosine protein phosphatase OS=Homo sapiens OX=9606	ACP1	0.035301	3.5634	N/D	N/D	41	7	310	7	158	18	6.74	2.00557	1.96664	1.9913	1.93717	1.91829	1.91271	1.89498	1.94982	2.03912
0.582085	-0.163576	0.892809	P24723	FALSE	Protein kinase C eta type OS=Homo sapiens OX=9606	PRKCH	0.107191	4.0794	N/D	N/D	14	8	219	7	683	77.8	7.77	-1.12818	-0.671593	-0.80213	-1.07736	-1.17302	-0.729225	-0.910441	-0.765581	-0.699837
0.982201	0.0295418	1.02069	P24752	FALSE	Acetyl-CoA acetyltransferase, mitochondrial OS=Homo sapiens OX=9606	ACAT1	-0.0206879	N/D	N/D	N/D	44	14	835	14	427	45.2	8.85	3.55556	3.52215	3.54532	3.58689	3.55762	3.56402	3.56049	3.49863	3.55767
1.21762	0.0449688	1.03166	P24928	TRUE	DNA-directed RNA polymerase II subunit RPB1 OS=Homo sapiens OX=9606	POLR2A	-0.0316608	N/D	N/D	N/D	31	66	1615	66	1970	217	7.37	3.57608	3.56927	3.58808	3.5907	3.58707	3.61066	3.49991	3.53687	3.53683
0.0459721	0.00611639	1.00425	P24941	FALSE	Cyclin-dependent kinase 2 OS=Homo sapiens OX=9606	CDK2	-0.00424856	N/D	N/D	N/D	55	15	811	13	298	33.9	8.68	1.86299	1.82084	1.88011	1.94501	1.88032	1.93696	1.99331	1.92002	2.01063
1.43278	0.0851995	1.06083	P25098	TRUE	Beta-adrenergic receptor kinase 1 OS=Homo sapiens OX=9606	GRK2	-0.0608344	N/D	N/D	N/D	33	20	639	14	689	79.5	7.28	1.80109	1.64875	1.78041	1.83381	1.84289	1.82373	1.7432	1.73325	1.78296
1.09437	0.0733746	1.05217	P25205	FALSE	DNA replication licensing factor MCM3 OS=Homo sapiens OX=9606	MCM3	-0.0521749	N/D	N/D	N/D	54	45	2443	45	808	90.9	5.77	5.38416	5.34646	5.37024	5.42565	5.33558	5.43828	5.26224	5.2838	5.31189
1.28129	0.113816	1.08209	P25325	FALSE	3-mercaptopyruvate sulfurtransferase OS=Homo sapiens OX=9606	MPST	-0.0820865	N/D	N/D	N/D	57	12	352	12	297	33.2	6.6	1.48032	1.48231	1.5234	1.651	1.58597	1.73758	1.65717	1.558	1.56498
0.211773	-0.00884549	0.993888	P25398	FALSE	40S ribosomal protein S12 OS=Homo sapiens OX=9606	RPS12	0.00611247	2.78888	N/D	N/D	55	9	1620	9	132	14.5	7.21	5.76776	5.77769	5.82463	5.80753	5.78222	5.79736	5.81917	5.80321	5.83484
4.13393	-0.1454	0.904129	P25440	TRUE	Bromodomain-containing protein 2 OS=Homo sapiens OX=9606	BRD2	0.0958711	4.02546	N/D	N/D	14	9	171	7	801	88	9.09	-1.08798	-1.15858	-1.1205	-1.26938	-1.30461	-1.26287	-1.13839	-1.1493	-1.14658
0.0720028	0.0365984	1.02569	P25445	FALSE	Tumor necrosis factor receptor superfamily member 6 OS=Homo sapiens OX=9606	FAS	-0.0256926	N/D	N/D	N/D	4	1	14	1	335	37.7	7.94	-5.10472	-5.22863	-5.58126	-5.21049	-5.46576	-5.41306	-5.75894	-5.08689	-5.63778
0.888634	-0.17064	0.888449	P25490	FALSE	Transcriptional repressor protein YY1 OS=Homo sapiens OX=9606	YY1	0.111551	4.09884	N/D	N/D	32	11	123	11	414	44.7	6.25	0.75012	0.714273	0.671673	0.689639	0.61074	0.218801	0.628896	0.645046	0.652189
0.694622	0.0309542	1.02169	P25685	TRUE	DnaJ homolog subfamily B member 1 OS=Homo sapiens OX=9606	DNAJB1	-0.0216876	N/D	N/D	N/D	48	22	926	21	340	38	8.63	3.57322	3.56396	3.55584	3.62605	3.54816	3.59615	3.57391	3.50679	3.58126
0.349651	0.0821884	1.05862	P25686	FALSE	DnaJ homolog subfamily B member 2 OS=Homo sapiens OX=9606	DNAJB2	-0.0586227	N/D	N/D	N/D	19	5	67	4	324	35.6	5.95	-1.20754	-1.20959	-1.3651	-1.38277	-1.22376	-1.16933	-1.27983	-1.62653	-1.35628
3.05603	0.0731317	1.052	P25705	FALSE	ATP synthase subunit alpha, mitochondrial OS=Homo sapiens OX=9606	ATP5F1A	-0.0519978	N/D	N/D	N/D	55	30	3247	30	553	59.7	9.13	7.00246	6.97828	6.97994	7.07809	7.04894	7.02795	6.98625	6.96016	6.96407
1.99167	0.0750801	1.05342	P25786	TRUE	Proteasome subunit alpha type-1 OS=Homo sapiens OX=9606	PSMA1	-0.0534195	N/D	N/D	N/D	84	19	1851	19	263	29.5	6.61	5.58587	5.60817	5.61526	5.71157	5.65981	5.62492	5.55276	5.5773	5.60278
2.80157	0.122317	1.08848	P25787	FALSE	Proteasome subunit alpha type-2 OS=Homo sapiens OX=9606	PSMA2	-0.0884812	N/D	N/D	N/D	64	14	839	14	234	25.9	7.43	4.3196	4.23522	4.26205	4.44143	4.38158	4.3671	4.29332	4.24428	4.29182
1.82754	0.0961709	1.06893	P25788	FALSE	Proteasome subunit alpha type-3 OS=Homo sapiens OX=9606	PSMA3	-0.0689326	N/D	N/D	N/D	42	11	1048	11	255	28.4	5.33	4.90695	4.9518	4.95199	5.0138	5.0285	4.96613	4.85878	4.84555	4.92476
1.59653	0.0777996	1.05541	P25789	FALSE	Proteasome subunit alpha type-4 OS=Homo sapiens OX=9606	PSMA4	-0.0554071	N/D	N/D	N/D	51	11	719	11	261	29.5	7.72	4.23412	4.14951	4.19153	4.32524	4.26886	4.21491	4.18007	4.17953	4.21647
0.520569	-0.100205	0.932901	P25800	FALSE	Rhombotin-1 OS=Homo sapiens OX=9606	LMO1	0.0670993	3.85688	N/D	N/D	15	2	19	2	156	17.8	7.97	-4.38275	-4.24763	-4.5395	-4.34326	-4.41785	-4.52774	-4.24425	-4.15821	-4.40414
1.77508	0.0604237	1.04277	P26038	FALSE	Moesin OS=Homo sapiens OX=9606	MSN	-0.042772	N/D	N/D	N/D	62	50	4960	34	577	67.8	6.4	6.34607	6.35859	6.34116	6.38635	6.37655	6.38522	6.28067	6.28755	6.31966
3.30935	-0.162047	0.893756	P26196	FALSE	Probable ATP-dependent RNA helicase DDX6 OS=Homo sapiens OX=9606	DDX6	0.106244	4.07509	N/D	N/D	55	21	871	21	483	54.4	8.66	3.50546	3.53967	3.46902	3.35073	3.38828	3.30471	3.49155	3.48913	3.56491
8.87638	-1.71955	0.303644	P26358	TRUE	DNA (cytosine-5)-methyltransferase 1 OS=Homo sapiens OX=9606	DNMT1	0.696356	5.36047	1.94954	5.36047	34	57	1882	57	1616	183.1	7.75	4.1829	4.14824	4.19384	2.48035	2.48505	2.31682	4.10867	4.13437	4.1137
0.943243	0.0433164	1.03048	P26368	FALSE	Splicing factor U2AF 65 kDa subunit OS=Homo sapiens OX=9606	U2AF2	-0.0304799	N/D	N/D	N/D	32	12	681	12	475	53.5	9.09	3.41203	3.41434	3.41027	3.49281	3.46822	3.44852	3.50214	3.40019	3.42023
2.09185	0.0912054	1.06526	P26373	TRUE	60S ribosomal protein L13 OS=Homo sapiens OX=9606	RPL13	-0.0652599	N/D	N/D	N/D	56	15	1790	15	211	24.2	11.65	5.61654	5.62566	5.64226	5.76648	5.70521	5.77557	5.69661	5.68553	5.68069
1.19797	0.272345	1.20777	P26374	FALSE	Rab proteins geranylgeranyltransferase component A 2 OS=Homo sapiens OX=9606	CHML	-0.207769	N/D	N/D	N/D	12	8	82	6	656	74	4.93	-1.82212	-1.50522	-1.92989	-1.34851	-1.45594	-1.34109	-1.47791	-1.73835	-1.45165
0.685376	0.0276198	1.01933	P26440	FALSE	Isovaleryl-CoA dehydrogenase, mitochondrial OS=Homo sapiens OX=9606	IVD	-0.019329	N/D	N/D	N/D	28	11	379	11	426	46.6	8.05	1.19089	1.22265	1.131	1.22553	1.1874	1.19909	1.18102	1.17385	1.15891
0.960756	0.50677	1.42087	P26447	FALSE	Protein S100-A4 OS=Homo sapiens OX=9606	S100A4	-0.420865	N/D	N/D	N/D	20	2	16	2	101	11.7	6.11	-4.29753	-3.58476	-4.70895	-3.22547	-3.60248	-3.54296	-3.65894	-3.82324	-3.70901
2.51028	0.0516941	1.03648	P26583	TRUE	High mobility group protein B2 OS=Homo sapiens OX=9606	HMGB2	-0.0364813	N/D	N/D	N/D	61	18	2036	15	209	24	7.81	5.52828	5.56807	5.53096	5.59565	5.58181	5.58325	5.53122	5.51083	5.54189
0.893521	0.0520533	1.03674	P26599	FALSE	Polypyrimidine tract-binding protein 1 OS=Homo sapiens OX=9606	PTBP1	-0.0367394	N/D	N/D	N/D	60	21	1686	19	531	57.2	9.17	5.15234	5.04603	5.15064	5.21904	5.13356	5.19168	5.12633	5.14411	5.15682
3.10534	0.0575229	1.04068	P26639	FALSE	Threonine--tRNA ligase 1, cytoplasmic OS=Homo sapiens OX=9606	TARS1	-0.0406774	N/D	N/D	N/D	59	35	1683	32	723	83.4	6.67	4.79305	4.77962	4.79655	4.82398	4.84329	4.84162	4.75701	4.76392	4.78249
0.207067	0.0133789	1.00932	P26640	TRUE	Valine--tRNA ligase OS=Homo sapiens OX=9606	VARS1	-0.00931671	N/D	N/D	N/D	40	43	1921	43	1264	140.4	7.59	3.8666	3.87795	3.86948	3.85225	3.83367	3.86701	3.79817	3.77629	3.8371
1.11955	-0.0449338	0.969334	P26641	FALSE	Elongation factor 1-gamma OS=Homo sapiens OX=9606	EEF1G	0.0306657	3.50018	N/D	N/D	52	26	2518	26	437	50.1	6.67	6.63762	6.66226	6.66896	6.59724	6.58558	6.58904	6.61642	6.57324	6.65482
7.38407	-0.680941	0.623758	P26885	FALSE	Peptidyl-prolyl cis-trans isomerase FKBP2 OS=Homo sapiens OX=9606	FKBP2	0.376242	4.78045	3.29624	4.78045	33	5	152	5	142	15.6	9.13	1.04526	1.06392	1.05913	0.361924	0.338595	0.344378	1.0626	0.979315	0.965227
0.269585	0.155682	1.11395	P27105	FALSE	Stomatin OS=Homo sapiens OX=9606	STOM	-0.113948	N/D	N/D	N/D	6	2	11	2	288	31.7	7.88	-5.64267	-5.14557	-6.06228	-5.14774	-5.59048	-5.47648	-5.52592	-5.85483	-5.13223
2.76438	0.277215	1.21185	P27144	FALSE	Adenylate kinase 4, mitochondrial OS=Homo sapiens OX=9606	AK4	-0.211853	N/D	N/D	N/D	27	5	102	5	223	25.3	8.4	-0.286522	-0.300325	-0.0905323	0.112645	0.0870848	0.0543652	-0.235038	-0.120588	-0.122095
4.05078	0.145883	1.10641	P27348	FALSE	14-3-3 protein theta OS=Homo sapiens OX=9606	YWHAQ	-0.106407	N/D	N/D	N/D	72	21	2916	14	245	27.7	4.78	5.10761	5.08445	5.04648	5.26506	5.22011	5.23586	5.11746	5.11625	5.09451
0.329299	0.0225317	1.01574	P27361	FALSE	Mitogen-activated protein kinase 3 OS=Homo sapiens OX=9606	MAPK3	-0.0157404	N/D	N/D	N/D	44	15	565	10	379	43.1	6.74	1.2051	1.20077	1.17282	1.18269	1.21592	1.22567	1.22097	1.096	1.21772
3.39479	-0.484364	0.714812	P27448	FALSE	MAP/microtubule affinity-regulating kinase 3 OS=Homo sapiens OX=9606	MARK3	0.285188	4.60094	4.58554	N/D	17	12	146	9	753	84.4	9.57	-1.63806	-1.55006	-1.56297	-2.11162	-2.09946	-2.16636	-1.84355	-1.5167	-1.73736
0.0545493	0.130484	1.09466	P27449	FALSE	V-type proton ATPase 16 kDa proteolipid subunit c OS=Homo sapiens OX=9606	ATP6V0C	-0.0946606	N/D	N/D	N/D	12	1	16	1	155	15.7	8.44	-4.84649	-2.67504	-2.85812	-3.24778	-3.12907	-4.73545	-3.64462	-3.03764	-5.9456
0.133924	0.184851	1.1367	P27482	FALSE	Calmodulin-like protein 3 OS=Homo sapiens OX=9606	CALML3	-0.136699	N/D	N/D	N/D	23	3	169	1	149	16.9	4.42	-4.8171	-4.74784	-5.26552	-5.31384	-3.77993	-3.53485	-3.85043	-3.74866	-3.9368
0.224741	0.0597107	1.04226	P27540	FALSE	Aryl hydrocarbon receptor nuclear translocator OS=Homo sapiens OX=9606	ARNT	-0.0422567	N/D	N/D	N/D	15	7	57	7	789	86.6	6.54	-1.80943	-1.78884	-1.70744	-1.86568	-1.82925	-1.77818	-1.79824	-2.17562	-2.0249
2.33243	0.10598	1.07623	P27635	FALSE	60S ribosomal protein L10 OS=Homo sapiens OX=9606	RPL10	-0.076225	N/D	N/D	N/D	47	11	1291	11	214	24.6	10.08	4.40644	4.43602	4.48834	4.52491	4.53949	4.50515	4.4145	4.39237	4.36556
4.3973	0.231179	1.17379	P27694	FALSE	Replication protein A 70 kDa DNA-binding subunit OS=Homo sapiens OX=9606	RPA1	-0.173794	N/D	N/D	N/D	37	26	821	26	616	68.1	7.21	3.34714	3.32056	3.33531	3.55534	3.54047	3.49932	3.27236	3.25629	3.27151
0.087607	0.00432126	1.003	P27695	FALSE	DNA-(apurinic or apyrimidinic site) endonuclease OS=Homo sapiens OX=9606	APEX1	-0.00299976	N/D	N/D	N/D	57	19	933	19	318	35.5	8.12	4.32314	4.34825	4.36492	4.36664	4.37032	4.32393	4.36003	4.31683	4.3827
0.70537	0.140892	1.10259	P27701	FALSE	CD82 antigen OS=Homo sapiens OX=9606	CD82	-0.102587	N/D	N/D	N/D	16	3	97	3	267	29.6	5.24	0.352974	0.806498	0.749701	0.826827	0.769996	0.848167	0.677533	0.752634	0.70529
1.45149	0.0606208	1.04291	P27707	FALSE	Deoxycytidine kinase OS=Homo sapiens OX=9606	DCK	-0.0429144	N/D	N/D	N/D	45	14	809	14	260	30.5	5.21	2.58427	2.60596	2.5459	2.63188	2.68739	2.61514	2.59057	2.62602	2.55238
5.07571	-0.12558	0.916636	P27708	TRUE	CAD protein OS=Homo sapiens OX=9606	CAD	0.0833643	3.95878	N/D	N/D	41	70	3225	70	2225	242.8	6.46	5.3787	5.39332	5.37396	5.26805	5.2554	5.23006	5.36889	5.3564	5.38923
3.44255	0.105752	1.07606	P27797	FALSE	Calreticulin OS=Homo sapiens OX=9606	CALR	-0.0760555	N/D	N/D	N/D	67	31	2886	31	417	48.1	4.44	6.71107	6.71378	6.70206	6.82349	6.76282	6.83694	6.70846	6.69303	6.68357
3.73281	-0.164062	0.892509	P27816	TRUE	Microtubule-associated protein 4 OS=Homo sapiens OX=9606	MAP4	0.107491	4.08076	N/D	N/D	41	34	1378	34	1152	120.9	5.43	4.00146	4.05991	4.05302	3.8803	3.83129	3.83548	3.99544	3.9856	3.98307
1.67505	0.0848705	1.06059	P27824	TRUE	Calnexin OS=Homo sapiens OX=9606	CANX	-0.0605925	N/D	N/D	N/D	48	32	1480	32	592	67.5	4.6	5.04334	5.17509	5.11772	5.16823	5.21277	5.17947	5.07481	5.08208	5.11867
2.78301	-0.168659	0.889669	P27986	TRUE	Phosphatidylinositol 3-kinase regulatory subunit alpha OS=Homo sapiens OX=9606	PIK3R1	0.110331	4.09347	N/D	N/D	30	20	456	20	724	83.5	6.16	0.938269	0.96892	0.933756	0.802978	0.733691	0.708452	0.944734	0.84532	0.871199
0.0194423	0.00341209	1.00237	P28062	FALSE	Proteasome subunit beta type-8 OS=Homo sapiens OX=9606	PSMB8	-0.00236788	N/D	N/D	N/D	44	10	699	10	276	30.3	7.43	3.13329	3.06528	3.09155	2.99101	3.07552	2.99277	2.92003	2.98989	2.89808
1.60663	0.0854204	1.061	P28065	FALSE	Proteasome subunit beta type-9 OS=Homo sapiens OX=9606	PSMB9	-0.0609969	N/D	N/D	N/D	37	8	379	8	219	23.3	5.03	2.10421	2.03443	2.10346	2.12619	2.13011	2.13707	2.02899	2.02863	1.97449
1.42263	-0.0435189	0.970285	P28066	FALSE	Proteasome subunit alpha type-5 OS=Homo sapiens OX=9606	PSMA5	0.0297146	3.48607	N/D	N/D	55	11	910	11	241	26.4	4.79	4.90541	4.89403	4.877	4.85842	4.8294	4.83904	4.89236	4.83612	4.90992
1.27193	0.0903335	1.06462	P28070	FALSE	Proteasome subunit beta type-4 OS=Homo sapiens OX=9606	PSMB4	-0.0646162	N/D	N/D	N/D	30	6	387	6	264	29.2	5.97	3.25328	3.16953	3.16999	3.28754	3.2263	3.24821	3.10109	3.08697	3.20125
0.00738822	-0.00095892	0.999336	P28072	FALSE	Proteasome subunit beta type-6 OS=Homo sapiens OX=9606	PSMB6	0.000664452	1.82275	N/D	N/D	51	9	659	9	239	25.3	4.92	3.48097	3.46071	3.59766	3.53039	3.52561	3.53718	3.50491	3.50146	3.6464
1.10669	0.0568643	1.0402	P28074	FALSE	Proteasome subunit beta type-5 OS=Homo sapiens OX=9606	PSMB5	-0.0402024	N/D	N/D	N/D	35	11	602	11	263	28.5	6.92	3.7434	3.73653	3.67882	3.77355	3.76006	3.71026	3.66014	3.64108	3.68658
0.265261	-0.0680556	0.953923	P28161	FALSE	Glutathione S-transferase Mu 2 OS=Homo sapiens OX=9606	GSTM2	0.0460772	3.68397	N/D	N/D	27	7	266	2	218	25.7	6.37	-0.85722	-0.842745	-0.844311	-0.701097	-1.17488	-0.765257	-0.677918	-0.871157	-0.780787
0.823826	0.0516448	1.03645	P28288	FALSE	ATP-binding cassette sub-family D member 3 OS=Homo sapiens OX=9606	ABCD3	-0.0364459	N/D	N/D	N/D	27	17	702	17	659	75.4	9.36	2.33042	2.38949	2.38316	2.44256	2.44546	2.39632	2.35856	2.331	2.46618
0.490986	-0.455232	0.729393	P28290	TRUE	Protein ITPRID2 OS=Homo sapiens OX=9606	ITPRID2	0.270607	4.56938	4.93329	N/D	2	2	4	2	1259	138.3	5.19	-5.98533	-5.84539	-6.03753	-6.48859	-5.79218	-6.08028	-6.04652	-4.29149	-5.78443
2.9184	0.184517	1.13644	P28331	FALSE	NADH-ubiquinone oxidoreductase 75 kDa subunit, mitochondrial OS=Homo sapiens OX=9606	NDUFS1	-0.136436	N/D	N/D	N/D	35	23	746	23	727	79.4	6.23	2.0791	2.2052	2.20023	2.363	2.37168	2.28748	2.12363	2.19304	2.13604
0.397467	-0.0485009	0.966941	P28340	TRUE	DNA polymerase delta catalytic subunit OS=Homo sapiens OX=9606	POLD1	0.0330594	3.5339	N/D	N/D	37	38	1024	38	1107	123.6	7.03	2.63055	2.57232	2.60555	2.63323	2.68075	2.5239	2.77546	2.66554	2.71733
0.322446	-0.0247884	0.982965	P28482	FALSE	Mitogen-activated protein kinase 1 OS=Homo sapiens OX=9606	MAPK1	0.0170352	3.23881	N/D	N/D	54	17	724	12	360	41.4	6.98	2.17606	2.13857	2.25437	2.1245	2.17243	2.19401	2.24321	2.13752	2.18089
0.144548	0.0782968	1.05577	P28676	FALSE	Grancalcin OS=Homo sapiens OX=9606	GCA	-0.0557709	N/D	N/D	N/D	9	1	2	1	217	24	5.21	-4.78111	-5.57275	-5.56257	-5.25244	-5.53651	-5.31573	-5.71464	-5.49897	-5.54909
4.65037	-0.732657	0.601795	P28702	TRUE	Retinoic acid receptor RXR-beta OS=Homo sapiens OX=9606	RXRB	0.398205	4.82066	3.10944	4.82066	17	8	82	6	533	56.9	8.18	-1.76516	-1.73425	-1.983	-2.48372	-2.70326	-2.58914	-1.96778	-1.86747	-1.83864
0.439668	0.0748096	1.05322	P28715	FALSE	DNA excision repair protein ERCC-5 OS=Homo sapiens OX=9606	ERCC5	-0.053222	N/D	N/D	N/D	20	17	254	17	1186	133	5.22	0.0154076	0.170139	0.0260029	0.20708	0.0630426	0.0483322	0.0992155	0.0530415	-0.175755
3.15337	1.14655	2.21383	P28749	TRUE	Retinoblastoma-like protein 1 OS=Homo sapiens OX=9606	RBL1	-1.21383	N/D	N/D	N/D	3	2	8	2	1068	120.8	7.5	-1.21975	-1.37692	-2.16135	-0.350904	-0.423535	-0.336082	-1.54946	-1.40155	-1.39129
0.394911	0.150488	1.10995	P28799	FALSE	Progranulin OS=Homo sapiens OX=9606	GRN	-0.109945	N/D	N/D	N/D	11	3	28	3	593	63.5	6.83	-2.04551	-2.54333	-2.15639	-1.9857	-1.89519	-1.94422	-2.12916	-1.67091	-2.00786
0.298963	0.0349294	1.02451	P28838	FALSE	Cytosol aminopeptidase OS=Homo sapiens OX=9606	LAP3	-0.0245067	N/D	N/D	N/D	57	28	1436	28	519	56.1	7.93	4.09505	4.09329	4.09786	4.19541	4.22319	4.18909	4.26825	4.20353	4.24783
0.286022	-0.0748989	0.949409	P28907	FALSE	ADP-ribosyl cyclase/cyclic ADP-ribose hydrolase 1 OS=Homo sapiens OX=9606	CD38	0.0505913	3.72662	N/D	N/D	14	4	35	4	300	34.3	7.66	-2.66349	-2.38129	-2.68196	-2.52465	-2.60105	-2.51427	-2.49273	-2.40523	-2.20583
0.205673	-0.194829	0.873676	P28908	TRUE	Tumor necrosis factor receptor superfamily member 8 OS=Homo sapiens OX=9606	TNFRSF8	0.126324	4.16013	68.7333	N/D	6	3	8	3	595	63.7	5.62	-4.30266	-4.33559	-4.65767	-4.34889	-5.67142	-4.62354	-4.53323	-5.54405	-4.74551
1.61305	0.154049	1.11269	P29016	FALSE	T-cell surface glycoprotein CD1b OS=Homo sapiens OX=9606	CD1B	-0.112688	N/D	N/D	N/D	14	4	146	4	333	36.9	6.29	-1.33167	-1.46045	-1.21876	-1.24617	-1.20589	-1.18097	-1.3388	-1.41481	-1.42589
0.835257	0.3125	1.24186	P29017	FALSE	T-cell surface glycoprotein CD1c OS=Homo sapiens OX=9606	CD1C	-0.241857	N/D	N/D	N/D	11	4	97	3	333	37.6	6.14	-1.19613	-1.18095	-1.27982	-1.19867	-1.11963	-1.24874	-1.8678	-1.80535	-1.67902
1.18558	0.092319	1.06608	P29083	FALSE	General transcription factor IIE subunit 1 OS=Homo sapiens OX=9606	GTF2E1	-0.0660824	N/D	N/D	N/D	27	10	161	10	439	49.4	4.82	-0.108517	-0.228579	-0.245211	-0.118869	-0.0957956	-0.16399	-0.31516	-0.200651	-0.213106
1.207	-0.11453	0.923683	P29084	FALSE	Transcription initiation factor IIE subunit beta OS=Homo sapiens OX=9606	GTF2E2	0.0763171	3.9171	N/D	N/D	35	9	195	9	291	33	9.66	0.402515	0.368879	0.449533	0.225072	0.258096	0.316753	0.472322	0.245749	0.348026
2.67136	0.0545135	1.03851	P29144	TRUE	Tripeptidyl-peptidase 2 OS=Homo sapiens OX=9606	TPP2	-0.0385088	N/D	N/D	N/D	50	54	2092	54	1249	138.3	6.32	4.39784	4.39593	4.39978	4.4473	4.43275	4.44875	4.38478	4.35252	4.39967
3.21235	0.172837	1.12727	P29218	FALSE	Inositol monophosphatase 1 OS=Homo sapiens OX=9606	IMPA1	-0.127273	N/D	N/D	N/D	49	13	382	13	277	30.2	5.26	2.24982	2.24168	2.13642	2.39058	2.36256	2.36763	2.19359	2.15139	2.23161
0.0094722	-0.00189034	0.998691	P29320	FALSE	Ephrin type-A receptor 3 OS=Homo sapiens OX=9606	EPHA3	0.00130943	2.11765	N/D	N/D	7	6	76	6	983	110.1	6.76	-0.710882	-0.810266	-0.67407	-0.745542	-0.923833	-0.62409	-0.777152	-0.834795	-0.768421
1.78906	0.0816471	1.05823	P29350	FALSE	Tyrosine-protein phosphatase non-receptor type 6 OS=Homo sapiens OX=9606	PTPN6	-0.0582255	N/D	N/D	N/D	47	24	871	24	595	67.5	7.78	2.24692	2.32996	2.28637	2.37291	2.40269	2.39953	2.31646	2.37258	2.30808
0.211315	0.0583053	1.04124	P29353	TRUE	SHC-transforming protein 1 OS=Homo sapiens OX=9606	SHC1	-0.0412419	N/D	N/D	N/D	23	10	93	10	583	62.8	6.44	-1.49179	-1.07131	-1.01936	-0.996007	-1.08726	-1.2168	-1.18047	-1.09717	-1.08987
4.98718	-0.960146	0.514005	P29372	FALSE	DNA-3-methyladenine glycosylase OS=Homo sapiens OX=9606	MPG	0.485995	4.97566	2.58181	4.97566	31	6	59	6	298	32.8	9.57	-1.6009	-1.7686	-1.65839	-2.69056	-2.68478	-2.6587	-1.98393	-1.61221	-1.68318
2.03102	0.26395	1.20076	P29374	FALSE	AT-rich interactive domain-containing protein 4A OS=Homo sapiens OX=9606	ARID4A	-0.200761	N/D	N/D	N/D	8	8	68	7	1257	142.7	5.1	-1.81714	-1.91	-1.82147	-1.45241	-1.49417	-1.68093	-1.85204	-1.81713	-1.62094
4.11056	0.16611	1.12203	P29401	FALSE	Transketolase OS=Homo sapiens OX=9606	TKT	-0.122029	N/D	N/D	N/D	74	38	2929	38	623	67.8	7.66	6.21963	6.18466	6.21952	6.42519	6.39369	6.37797	6.25691	6.26299	6.25333
0.678119	-0.112947	0.924697	P29558	FALSE	RNA-binding motif, single-stranded-interacting protein 1 OS=Homo sapiens OX=9606	RBMS1	0.0753025	3.91081	N/D	N/D	12	4	46	4	406	44.5	8.79	-1.74586	-1.60295	-1.68963	-1.77784	-1.5782	-1.78816	-1.61394	-1.42011	-1.53821
0.0483485	0.0102175	1.00711	P29590	TRUE	Protein PML OS=Homo sapiens OX=9606	PML	-0.00710737	N/D	N/D	N/D	33	24	878	24	882	97.5	6.21	2.31834	2.38278	2.25689	2.21107	2.18351	2.43946	2.30358	2.13565	2.20953
0.776786	-0.586847	0.665796	P29597	TRUE	Non-receptor tyrosine-protein kinase TYK2 OS=Homo sapiens OX=9606	TYK2	0.334204	4.70067	3.75793	N/D	5	5	26	4	1187	133.6	7.15	-2.92692	-4.0044	-3.50045	-4.11459	-5.04128	-3.49797	-3.91737	-3.52694	-3.9105
0.591967	0.0244206	1.01707	P29692	FALSE	Elongation factor 1-delta OS=Homo sapiens OX=9606	EEF1D	-0.0170711	N/D	N/D	N/D	83	25	1586	21	281	31.1	5.01	5.34196	5.30637	5.25464	5.31709	5.29837	5.32009	5.26472	5.28526	5.27163
0.732645	0.15455	1.11307	P29728	TRUE	2'-5'-oligoadenylate synthase 2 OS=Homo sapiens OX=9606	OAS2	-0.113075	N/D	N/D	N/D	3	2	5	2	719	82.4	8.25	-4.71851	-4.54793	-4.45198	-4.61233	-4.47725	-4.46005	-4.59438	-4.87322	-4.84054
1.21627	0.103786	1.07459	P30038	FALSE	Delta-1-pyrroline-5-carboxylate dehydrogenase, mitochondrial OS=Homo sapiens OX=9606	ALDH4A1	-0.0745895	N/D	N/D	N/D	25	13	293	13	563	61.7	8.07	2.11024	2.19757	2.16832	2.2201	2.27024	2.17002	2.02932	2.15763	2.03492
0.752067	0.0204568	1.01428	P30040	FALSE	Endoplasmic reticulum resident protein 29 OS=Homo sapiens OX=9606	ERP29	-0.0142806	N/D	N/D	N/D	43	10	471	10	261	29	7.31	2.65867	2.59101	2.62963	2.6454	2.6495	2.63657	2.62921	2.61983	2.61183
2.6277	0.115153	1.08309	P30041	FALSE	Peroxiredoxin-6 OS=Homo sapiens OX=9606	PRDX6	-0.08309	N/D	N/D	N/D	82	18	940	18	224	25	6.38	4.17246	4.12812	4.15463	4.25561	4.21955	4.24623	4.10064	4.06116	4.13486
0.81934	0.0834632	1.05956	P30043	FALSE	Flavin reductase (NADPH) OS=Homo sapiens OX=9606	BLVRB	-0.0595585	N/D	N/D	N/D	37	5	190	5	206	22.1	7.65	0.387526	0.43911	0.48324	0.495952	0.436488	0.430252	0.310735	0.255295	0.3487
1.65138	0.0967546	1.06937	P30044	FALSE	Peroxiredoxin-5, mitochondrial OS=Homo sapiens OX=9606	PRDX5	-0.0693651	N/D	N/D	N/D	29	6	449	6	214	22.1	8.7	3.1986	3.27253	3.28283	3.43606	3.34432	3.36169	3.31426	3.31865	3.31675
1.85842	0.208842	1.15576	P30046	FALSE	D-dopachrome decarboxylase OS=Homo sapiens OX=9606	DDT	-0.15576	N/D	N/D	N/D	52	6	287	6	118	12.7	7.3	1.60126	1.56553	1.60245	1.92598	1.87019	1.87206	1.79336	1.71389	1.80694
2.70059	0.270164	1.20594	P30048	FALSE	Thioredoxin-dependent peroxide reductase, mitochondrial OS=Homo sapiens OX=9606	PRDX3	-0.205945	N/D	N/D	N/D	48	8	748	8	256	27.7	7.78	4.72302	4.69392	4.69071	5.05816	5.05437	5.06065	4.8794	4.88463	4.85369
1.3688	0.0945913	1.06776	P30049	FALSE	ATP synthase subunit delta, mitochondrial OS=Homo sapiens OX=9606	ATP5F1D	-0.0677629	N/D	N/D	N/D	38	3	91	3	168	17.5	5.49	1.45771	1.45686	1.36907	1.53996	1.53075	1.5384	1.50836	1.4999	1.35878
0.91058	0.0628311	1.04451	P30050	FALSE	60S ribosomal protein L12 OS=Homo sapiens OX=9606	RPL12	-0.0445135	N/D	N/D	N/D	64	8	792	8	165	17.8	9.42	5.12576	5.02941	5.02387	5.20349	5.0935	5.06914	5.05308	5.08507	5.0381
2.88754	0.10676	1.07681	P30084	FALSE	Enoyl-CoA hydratase, mitochondrial OS=Homo sapiens OX=9606	ECHS1	-0.0768074	N/D	N/D	N/D	41	12	497	12	290	31.4	8.07	2.32886	2.33492	2.28645	2.44304	2.37896	2.45625	2.3018	2.34795	2.31595
0.940255	0.0933582	1.06685	P30085	FALSE	UMP-CMP kinase OS=Homo sapiens OX=9606	CMPK1	-0.0668506	N/D	N/D	N/D	41	8	278	8	196	22.2	5.57	1.54563	1.58667	1.54092	1.70629	1.51478	1.65999	1.43465	1.59443	1.49967
3.07281	0.101248	1.0727	P30086	FALSE	Phosphatidylethanolamine-binding protein 1 OS=Homo sapiens OX=9606	PEBP1	-0.0727012	N/D	N/D	N/D	82	13	1654	13	187	21	7.53	5.12106	5.10011	5.12834	5.23396	5.22645	5.25602	5.16608	5.13266	5.1771
2.46924	0.155583	1.11387	P30101	FALSE	Protein disulfide-isomerase A3 OS=Homo sapiens OX=9606	PDIA3	-0.113872	N/D	N/D	N/D	55	31	1862	31	505	56.7	6.35	4.97028	5.08351	4.99694	5.21615	5.22742	5.19978	5.10454	5.10125	5.09668
2.77277	0.150109	1.10965	P30153	FALSE	Serine/threonine-protein phosphatase 2A 65 kDa regulatory subunit A alpha isoform OS=Homo sapiens OX=9606	PPP2R1A	-0.109653	N/D	N/D	N/D	53	27	1554	19	589	65.3	5.11	4.47388	4.4756	4.44624	4.61548	4.66331	4.65779	4.49175	4.49856	4.58648
0.783111	0.106496	1.07661	P30154	FALSE	Serine/threonine-protein phosphatase 2A 65 kDa regulatory subunit A beta isoform OS=Homo sapiens OX=9606	PPP2R1B	-0.07661	N/D	N/D	N/D	34	19	761	11	601	66.2	4.94	1.31209	1.32757	1.40693	1.58129	1.52227	1.55916	1.53433	1.56086	1.5447
9.4099	-1.26368	0.41648	P30260	TRUE	Cell division cycle protein 27 homolog OS=Homo sapiens OX=9606	CDC27	0.58352	5.14646	2.22278	5.14646	25	18	303	18	824	91.8	7.02	1.88541	1.85051	1.92319	0.66603	0.602077	0.590771	1.90666	1.83316	1.9009
0.287141	0.032798	1.02299	P30281	FALSE	G1/S-specific cyclin-D3 OS=Homo sapiens OX=9606	CCND3	-0.0229942	N/D	N/D	N/D	10	3	62	3	292	32.5	7.06	-2.01099	-2.04066	-2.01832	-1.90035	-1.89643	-2.01829	-1.92483	-1.86229	-1.96982
2.81354	-2.04925	0.241609	P30291	TRUE	Wee1-like protein kinase OS=Homo sapiens OX=9606	WEE1	0.758391	5.49678	1.83497	5.49678	9	5	11	5	646	71.6	6.77	-2.6739	-2.40361	-3.00008	-4.66968	-5.2573	-3.46688	-2.05071	-2.2805	-2.0834
0.0774936	-0.0394549	0.973022	P30305	FALSE	M-phase inducer phosphatase 2 OS=Homo sapiens OX=9606	CDC25B	0.0269775	3.44288	N/D	N/D	8	4	30	4	580	64.9	6.4	-2.84565	-3.19732	-2.97423	-3.01613	-3.16927	-3.07589	-3.56218	-3.01851	-2.68797
1.19562	0.165766	1.12176	P30307	FALSE	M-phase inducer phosphatase 3 OS=Homo sapiens OX=9606	CDC25C	-0.121761	N/D	N/D	N/D	17	8	65	8	473	53.3	6.79	-1.934	-1.8649	-2.03365	-1.71493	-1.83152	-1.57693	-1.80941	-1.76353	-1.83586
0.15664	0.0455918	1.03211	P30405	FALSE	Peptidyl-prolyl cis-trans isomerase F, mitochondrial OS=Homo sapiens OX=9606	PPIF	-0.0321065	N/D	N/D	N/D	50	9	324	7	207	22	9.38	0.698133	0.933733	0.963005	0.830083	0.995738	0.631153	0.780736	0.592546	0.672243
1.05638	0.220275	1.16496	P30414	FALSE	NK-tumor recognition protein OS=Homo sapiens OX=9606	NKTR	-0.164956	N/D	N/D	N/D	6	8	98	8	1462	165.6	9.99	-1.71998	-1.69276	-1.86075	-1.68746	-1.7605	-1.60953	-1.96391	-2.12136	-2.07787
0.586286	0.0506018	1.0357	P30419	TRUE	Glycylpeptide N-tetradecanoyltransferase 1 OS=Homo sapiens OX=9606	NMT1	-0.0356969	N/D	N/D	N/D	22	13	458	9	496	56.8	7.8	2.25196	2.19822	2.18367	2.35097	2.3341	2.20356	2.25457	2.28413	2.3011
3.02941	0.102359	1.07353	P30519	FALSE	Heme oxygenase 2 OS=Homo sapiens OX=9606	HMOX2	-0.0735271	N/D	N/D	N/D	34	10	379	10	316	36	5.41	1.83045	1.82075	1.76702	1.93043	1.93017	1.88983	1.79732	1.84177	1.8294
1.00042	0.0764899	1.05445	P30520	FALSE	Adenylosuccinate synthetase isozyme 2 OS=Homo sapiens OX=9606	ADSS2	-0.0544494	N/D	N/D	N/D	49	21	785	19	456	50.1	6.55	3.0891	3.14181	3.14249	3.28936	3.26846	3.20146	3.2239	3.21766	3.24467
0.396921	-0.0164307	0.988676	P30533	FALSE	Alpha-2-macroglobulin receptor-associated protein OS=Homo sapiens OX=9606	LRPAP1	0.0113243	3.05896	N/D	N/D	36	11	366	11	357	41.4	8.78	1.07193	1.04317	1.06131	1.0963	1.00785	1.04294	1.07069	1.06699	1.07868
0.234922	0.0593867	1.04202	P30566	FALSE	Adenylosuccinate lyase OS=Homo sapiens OX=9606	ADSL	-0.0420227	N/D	N/D	N/D	56	18	560	18	484	54.9	7.11	3.13564	2.78041	3.18641	3.20218	3.0233	3.24175	3.15892	3.17023	3.14655
0.304079	0.0308433	1.02161	P30622	FALSE	CAP-Gly domain-containing linker protein 1 OS=Homo sapiens OX=9606	CLIP1	-0.0216091	N/D	N/D	N/D	20	26	343	26	1438	162.1	5.36	0.946815	0.931602	1.08722	0.987346	1.00253	0.985018	0.901097	0.899797	0.998196
5.06823	0.129955	1.09426	P30626	FALSE	Sorcin OS=Homo sapiens OX=9606	SRI	-0.0942599	N/D	N/D	N/D	52	9	810	9	198	21.7	5.59	3.04018	2.99619	3.03008	3.14367	3.14059	3.15301	3.01997	2.99324	3.01513
0.637091	0.0495563	1.03495	P30679	FALSE	Guanine nucleotide-binding protein subunit alpha-15 OS=Homo sapiens OX=9606	GNA15	-0.0349465	N/D	N/D	N/D	17	5	67	5	374	43.5	8.51	-2.26097	-2.14326	-2.32956	-2.23675	-2.18243	-2.19503	-2.26592	-2.26151	-2.26452
0.233236	-0.13321	0.9118	P30793	TRUE	GTP cyclohydrolase 1 OS=Homo sapiens OX=9606	GCH1	0.0881998	3.98557	N/D	N/D	8	2	2	2	250	27.9	8.56	-4.00159	-4.45692	-4.46821	-5.0569	-4.13888	-4.28605	-4.26984	-4.68594	-4.2819
2.07829	0.199235	1.14809	P30825	FALSE	High affinity cationic amino acid transporter 1 OS=Homo sapiens OX=9606	SLC7A1	-0.14809	N/D	N/D	N/D	8	4	83	4	629	67.6	5.43	0.69153	0.612434	0.692141	0.915994	0.907054	0.938684	0.690867	0.881088	0.759991
1.71222	0.0680203	1.04828	P30876	FALSE	DNA-directed RNA polymerase II subunit RPB2 OS=Homo sapiens OX=9606	POLR2B	-0.0482773	N/D	N/D	N/D	39	43	1407	43	1174	133.8	6.87	3.54304	3.55942	3.57987	3.61089	3.6006	3.59808	3.52569	3.46983	3.53316
1.77208	0.0948879	1.06798	P31040	TRUE	Succinate dehydrogenase [ubiquinone] flavoprotein subunit, mitochondrial OS=Homo sapiens OX=9606	SDHA	-0.0679824	N/D	N/D	N/D	47	23	960	23	664	72.6	7.39	3.6276	3.60612	3.60828	3.72208	3.68925	3.68172	3.67509	3.53315	3.56652
0.701018	0.0290068	1.02031	P31146	FALSE	Coronin-1A OS=Homo sapiens OX=9606	CORO1A	-0.0203095	N/D	N/D	N/D	47	23	2191	20	461	51	6.68	5.37968	5.40292	5.39022	5.45058	5.46892	5.40689	5.44923	5.41589	5.4408
0.621524	0.0257716	1.01802	P31150	FALSE	Rab GDP dissociation inhibitor alpha OS=Homo sapiens OX=9606	GDI1	-0.018024	N/D	N/D	N/D	53	22	1102	12	447	50.6	5.14	2.21637	2.26417	2.23803	2.24943	2.24419	2.25912	2.17964	2.19752	2.25514
2.16605	0.0872766	1.06236	P31153	FALSE	S-adenosylmethionine synthase isoform type-2 OS=Homo sapiens OX=9606	MAT2A	-0.0623629	N/D	N/D	N/D	55	20	1075	20	395	43.6	6.48	4.65965	4.70046	4.6839	4.76075	4.71715	4.76184	4.6513	4.66251	4.59799
1.50855	0.146005	1.1065	P31321	FALSE	cAMP-dependent protein kinase type I-beta regulatory subunit OS=Homo sapiens OX=9606	PRKAR1B	-0.106502	N/D	N/D	N/D	10	4	119	2	381	43	5.71	-2.73108	-2.5718	-2.51544	-2.52434	-2.46552	-2.4858	-2.70753	-2.59518	-2.70632
0.766221	0.0626502	1.04438	P31323	FALSE	cAMP-dependent protein kinase type II-beta regulatory subunit OS=Homo sapiens OX=9606	PRKAR2B	-0.0443825	N/D	N/D	N/D	26	8	193	7	418	46.3	4.92	-1.15495	-1.00856	-1.07794	-1.00546	-1.01583	-1.02396	-0.98478	-1.13603	-1.10414
1.30479	-0.0830611	0.944052	P31350	FALSE	Ribonucleoside-diphosphate reductase subunit M2 OS=Homo sapiens OX=9606	RRM2	0.0559475	3.77278	N/D	N/D	40	16	751	15	389	44.8	5.38	2.72011	2.77619	2.73251	2.61173	2.71526	2.59514	2.7126	2.65225	2.74899
0.0378347	0.00750049	1.00521	P31483	FALSE	Cytotoxic granule associated RNA binding protein TIA1 OS=Homo sapiens OX=9606	TIA1	-0.00521248	N/D	N/D	N/D	31	9	437	6	386	42.9	7.74	0.665117	0.864275	0.829971	0.747613	0.651278	0.775135	0.653678	0.586679	0.703329
0.476778	0.136323	1.0991	P31641	FALSE	Sodium- and chloride-dependent taurine transporter OS=Homo sapiens OX=9606	SLC6A6	-0.0991001	N/D	N/D	N/D	4	2	29	2	620	69.8	7.39	-3.91722	-4.24233	-3.82174	-3.73399	-3.82977	-4.18834	-4.13411	-4.16307	-4.04368
0.53923	-0.0403438	0.972423	P31689	FALSE	DnaJ homolog subfamily A member 1 OS=Homo sapiens OX=9606	DNAJA1	0.0275768	3.45269	N/D	N/D	57	22	1134	22	397	44.8	7.08	4.40943	4.42047	4.34598	4.29284	4.28467	4.39413	4.35791	4.35161	4.29993
1.79606	-0.144686	0.904576	P31749	FALSE	RAC-alpha serine/threonine-protein kinase OS=Homo sapiens OX=9606	AKT1	0.0954235	4.02321	N/D	N/D	17	8	165	5	480	55.7	6.07	0.0291042	-0.0215187	-0.0695133	-0.146157	-0.257073	-0.164494	-0.140216	0.0236092	-0.0888004
0.0521767	0.00492779	1.00342	P31751	TRUE	RAC-beta serine/threonine-protein kinase OS=Homo sapiens OX=9606	AKT2	-0.00342153	N/D	N/D	N/D	29	13	303	10	481	55.7	6.37	0.529495	0.519039	0.517733	0.554885	0.501533	0.458344	0.547359	0.424856	0.461473
0.649009	-0.0658784	0.955363	P31785	FALSE	Cytokine receptor common subunit gamma OS=Homo sapiens OX=9606	IL2RG	0.0446365	3.66952	N/D	N/D	10	3	37	3	369	42.3	6.34	0.256281	0.173018	0.285688	0.0844946	0.116815	0.266853	0.138137	0.242123	0.236349
2.25678	0.1406	1.10236	P31930	FALSE	Cytochrome b-c1 complex subunit 1, mitochondrial OS=Homo sapiens OX=9606	UQCRC1	-0.102364	N/D	N/D	N/D	49	17	717	16	480	52.6	6.37	3.02014	3.09205	2.97348	3.08792	3.18316	3.16689	2.95496	2.97261	3.0191
0.112485	-0.0245887	0.983101	P31937	FALSE	3-hydroxyisobutyrate dehydrogenase, mitochondrial OS=Homo sapiens OX=9606	HIBADH	0.0168992	3.23527	N/D	N/D	26	6	74	6	336	35.3	8.13	0.727976	0.913671	0.688137	0.810422	0.869971	0.85635	0.902589	0.94924	1.03941
4.729	0.129288	1.09375	P31939	FALSE	Bifunctional purine biosynthesis protein ATIC OS=Homo sapiens OX=9606	ATIC	-0.0937537	N/D	N/D	N/D	71	34	2240	34	592	64.6	6.71	5.90878	5.91715	5.88519	6.05497	6.03205	6.03933	5.93535	5.89719	5.93332
0.194038	0.0186658	1.01302	P31942	FALSE	Heterogeneous nuclear ribonucleoprotein H3 OS=Homo sapiens OX=9606	HNRNPH3	-0.0130222	N/D	N/D	N/D	69	20	1529	18	346	36.9	6.87	3.75765	3.83209	3.84702	3.75934	3.83504	3.78213	3.69589	3.72672	3.78167
0.472379	0.0356008	1.02498	P31943	FALSE	Heterogeneous nuclear ribonucleoprotein H OS=Homo sapiens OX=9606	HNRNPH1	-0.0249836	N/D	N/D	N/D	65	22	3085	10	449	49.2	6.3	5.25501	5.33382	5.33201	5.29781	5.34368	5.27249	5.24535	5.20025	5.24789
1.17261	0.0564443	1.0399	P31946	FALSE	14-3-3 protein beta/alpha OS=Homo sapiens OX=9606	YWHAB	-0.0398997	N/D	N/D	N/D	71	17	1942	9	246	28.1	4.83	3.91289	3.89679	3.88887	4.01294	3.94948	3.9568	3.91947	3.89214	3.98962
2.52757	0.0636493	1.04511	P31948	TRUE	Stress-induced-phosphoprotein 1 OS=Homo sapiens OX=9606	STIP1	-0.045106	N/D	N/D	N/D	63	39	3746	39	543	62.6	6.8	6.52219	6.50778	6.51713	6.57586	6.60811	6.56315	6.54379	6.5319	6.48953
0.311521	-0.24284	0.84508	P32019	FALSE	Type II inositol 1,4,5-trisphosphate 5-phosphatase OS=Homo sapiens OX=9606	INPP5B	0.15492	4.26321	17.2135	N/D	5	4	34	3	993	112.8	5.57	-5.96313	-5.35286	-5.31967	-6.16359	-5.45248	-6.39343	-6.29272	-5.38713	-6.24646
2.48255	0.137033	1.09964	P32119	FALSE	Peroxiredoxin-2 OS=Homo sapiens OX=9606	PRDX2	-0.0996413	N/D	N/D	N/D	66	9	1010	8	198	21.9	5.97	4.08391	4.09218	4.11879	4.26976	4.27809	4.27876	4.18938	4.13333	4.21343
1.80351	-0.348447	0.785429	P32121	TRUE	Beta-arrestin-2 OS=Homo sapiens OX=9606	ARRB2	0.214571	4.43646	7.23657	N/D	26	10	280	10	409	46.1	7.69	1.08836	1.09567	1.01721	0.832006	0.82376	0.352455	0.956986	0.975283	0.973621
1.53659	-0.582524	0.667795	P32189	FALSE	Glycerol kinase OS=Homo sapiens OX=9606	GK	0.332205	4.69676	3.78433	N/D	6	4	44	4	559	61.2	6.54	-2.67675	-2.80956	-2.63577	-3.63103	-3.80064	-3.06116	-3.32098	-3.02129	-3.02617
1.07889	-0.114444	0.923738	P32321	FALSE	Deoxycytidylate deaminase OS=Homo sapiens OX=9606	DCTD	0.0762615	3.91676	N/D	N/D	26	4	128	4	178	20	7.56	-0.342833	-0.382517	-0.424994	-0.343558	-0.627217	-0.512362	-0.364392	-0.364449	-0.400429
3.73637	0.1922	1.1425	P32322	FALSE	Pyrroline-5-carboxylate reductase 1, mitochondrial OS=Homo sapiens OX=9606	PYCR1	-0.142504	N/D	N/D	N/D	40	12	287	11	319	33.3	7.61	0.653955	0.662819	0.596024	0.79601	0.80235	0.891165	0.62173	0.619122	0.672203
0.442688	-0.106873	0.928599	P32455	FALSE	Guanylate-binding protein 1 OS=Homo sapiens OX=9606	GBP1	0.0714014	3.88588	N/D	N/D	25	16	294	16	592	67.9	6.32	1.05652	0.758615	0.69161	0.74274	0.740478	0.651676	0.715083	0.652864	1.03633
0.356212	0.0512586	1.03617	P32519	TRUE	ETS-related transcription factor Elf-1 OS=Homo sapiens OX=9606	ELF1	-0.0361685	N/D	N/D	N/D	21	9	191	9	619	67.5	5.21	-0.27556	-0.289568	-0.321665	-0.337667	-0.29345	-0.0552902	-0.242532	-0.328213	-0.222828
2.37886	-0.422409	0.746178	P32780	FALSE	General transcription factor IIH subunit 1 OS=Homo sapiens OX=9606	GTF2H1	0.253822	4.53169	5.42526	N/D	25	11	133	11	548	62	8.66	1.35478	1.29485	1.62692	1.03006	0.899251	0.808931	1.20563	1.31375	1.21501
0.315049	0.0542343	1.03831	P32929	FALSE	Cystathionine gamma-lyase OS=Homo sapiens OX=9606	CTH	-0.0383079	N/D	N/D	N/D	13	4	14	4	405	44.5	6.7	-1.42242	-1.29778	-1.33359	-1.17435	-1.41522	-1.43515	-1.40425	-1.53332	-1.38348
2.64585	0.167417	1.12305	P32942	FALSE	Intercellular adhesion molecule 3 OS=Homo sapiens OX=9606	ICAM3	-0.123046	N/D	N/D	N/D	13	7	335	7	547	59.5	5.43	1.04076	0.992029	0.937485	1.10646	1.11619	1.14506	0.901366	0.885406	0.973877
0.667276	0.0324562	1.02275	P32969	FALSE	60S ribosomal protein L9 OS=Homo sapiens OX=9606	RPL9	-0.0227519	N/D	N/D	N/D	66	10	778	10	192	21.9	9.95	4.60954	4.60477	4.53655	4.58543	4.59449	4.61208	4.57662	4.55011	4.5117
0.511375	0.509931	1.42398	P33121	TRUE	Long-chain-fatty-acid--CoA ligase 1 OS=Homo sapiens OX=9606	ACSL1	-0.423982	N/D	N/D	N/D	6	4	15	4	698	77.9	7.15	-5.82604	-3.94573	-5.50756	-4.51119	-3.97408	-4.1868	-4.55908	-4.37339	-4.19191
2.24143	0.050185	1.0354	P33176	FALSE	Kinesin-1 heavy chain OS=Homo sapiens OX=9606	KIF5B	-0.0353977	N/D	N/D	N/D	53	46	1745	36	963	109.6	6.51	3.53937	3.52709	3.51951	3.611	3.58077	3.59029	3.55724	3.54926	3.57055
0.731257	0.101051	1.07255	P33240	FALSE	Cleavage stimulation factor subunit 2 OS=Homo sapiens OX=9606	CSTF2	-0.0725544	N/D	N/D	N/D	41	15	583	9	577	60.9	6.83	1.58768	1.52559	1.35205	1.6813	1.60729	1.46848	1.51676	1.53765	1.38811
2.4231	0.0826278	1.05895	P33316	FALSE	Deoxyuridine 5'-triphosphate nucleotidohydrolase, mitochondrial OS=Homo sapiens OX=9606	DUT	-0.0589451	N/D	N/D	N/D	51	12	1049	12	252	26.5	9.36	4.51223	4.46208	4.50613	4.59389	4.61382	4.54533	4.53232	4.49028	4.50728
0.419288	-0.0628753	0.957354	P33527	FALSE	Multidrug resistance-associated protein 1 OS=Homo sapiens OX=9606	ABCC1	0.0426458	3.6488	N/D	N/D	19	24	572	24	1531	171.5	7.11	1.79449	1.7389	1.75239	1.58138	1.63188	1.61603	1.52726	1.5493	1.67352
0.111606	0.0136237	1.00949	P33552	FALSE	Cyclin-dependent kinases regulatory subunit 2 OS=Homo sapiens OX=9606	CKS2	-0.00948797	N/D	N/D	N/D	57	4	255	4	79	9.9	8.46	1.53946	1.34896	1.35909	1.40863	1.41148	1.48902	1.40186	1.4291	1.45805
0.399106	-0.0304697	0.979101	P33981	FALSE	Dual specificity protein kinase TTK OS=Homo sapiens OX=9606	TTK	0.0208985	3.32929	N/D	N/D	18	12	321	12	857	97	8.16	0.31444	0.304741	0.361101	0.300708	0.336822	0.250299	0.337771	0.392017	0.248405
2.3699	0.0421071	1.02962	P33991	FALSE	DNA replication licensing factor MCM4 OS=Homo sapiens OX=9606	MCM4	-0.0296165	N/D	N/D	N/D	53	39	2247	39	863	96.5	6.74	5.39218	5.37744	5.38667	5.43833	5.43793	5.42691	5.40756	5.37426	5.41559
0.555951	0.029435	1.02061	P33992	FALSE	DNA replication licensing factor MCM5 OS=Homo sapiens OX=9606	MCM5	-0.0206123	N/D	N/D	N/D	55	39	2067	39	734	82.2	8.37	5.13267	5.12196	5.14245	5.13719	5.11751	5.12554	5.0411	5.06018	5.08553
1.82694	0.0414875	1.02917	P33993	FALSE	DNA replication licensing factor MCM7 OS=Homo sapiens OX=9606	MCM7	-0.0291744	N/D	N/D	N/D	55	40	2181	40	719	81.3	6.46	5.30945	5.34974	5.33813	5.35808	5.37843	5.37051	5.349	5.30309	5.31571
0.0927717	0.0103532	1.0072	P34896	FALSE	Serine hydroxymethyltransferase, cytosolic OS=Homo sapiens OX=9606	SHMT1	-0.00720214	N/D	N/D	N/D	37	16	537	16	483	53	7.71	1.90217	1.88455	2.01396	1.95535	1.96382	1.95069	1.86949	1.98711	2.02034
1.68516	0.0717063	1.05096	P34897	FALSE	Serine hydroxymethyltransferase, mitochondrial OS=Homo sapiens OX=9606	SHMT2	-0.0509589	N/D	N/D	N/D	58	25	2201	25	504	56	8.53	5.33013	5.28541	5.32813	5.37692	5.3934	5.32048	5.26213	5.29241	5.25314
1.25834	0.0694674	1.04933	P34913	FALSE	Bifunctional epoxide hydrolase 2 OS=Homo sapiens OX=9606	EPHX2	-0.0493292	N/D	N/D	N/D	20	10	282	10	555	62.6	6.28	1.35774	1.40151	1.38051	1.47821	1.40411	1.41957	1.2897	1.41089	1.34661
0.573741	0.125896	1.09118	P34931	FALSE	Heat shock 70 kDa protein 1-like OS=Homo sapiens OX=9606	HSPA1L	-0.091185	N/D	N/D	N/D	20	11	1931	1	641	70.3	6.02	-4.07415	-4.44558	-4.24392	-3.93299	-4.16982	-4.11025	-4.10874	-4.02879	-4.28031
1.6335	0.0631468	1.04474	P34932	FALSE	Heat shock 70 kDa protein 4 OS=Homo sapiens OX=9606	HSPA4	-0.044742	N/D	N/D	N/D	75	59	3171	56	840	94.3	5.19	5.99598	6.02687	6.04174	6.07351	6.06684	6.03652	5.97338	5.98876	5.94815
0.380956	0.130517	1.09469	P34949	FALSE	Mannose-6-phosphate isomerase OS=Homo sapiens OX=9606	MPI	-0.0946856	N/D	N/D	N/D	21	7	121	7	423	46.6	5.95	-1.05113	-1.31962	-0.795021	-0.748202	-1.03762	-0.717928	-0.797662	-1.08887	-0.738291
1.23657	0.0767261	1.05462	P35080	FALSE	Profilin-2 OS=Homo sapiens OX=9606	PFN2	-0.0546221	N/D	N/D	N/D	36	4	205	4	140	15	6.99	0.725811	0.728706	0.680061	0.752206	0.789327	0.702606	0.615054	0.620174	0.658113
0.639384	0.0609581	1.04316	P35219	FALSE	Carbonic anhydrase-related protein OS=Homo sapiens OX=9606	CA8	-0.0431583	N/D	N/D	N/D	37	7	117	7	290	33	4.86	-0.997932	-0.891569	-0.812159	-0.882167	-0.891185	-0.797667	-0.937312	-0.986767	-0.882046
2.11796	-0.22652	0.854694	P35221	FALSE	Catenin alpha-1 OS=Homo sapiens OX=9606	CTNNA1	0.145306	4.23047	22.7962	N/D	22	15	282	15	906	100	6.29	2.87554	2.71972	2.8889	2.50582	2.63112	2.54152	2.64814	2.82325	2.76049
0.503844	-0.203031	0.868724	P35222	FALSE	Catenin beta-1 OS=Homo sapiens OX=9606	CTNNB1	0.131276	4.1793	44.7202	N/D	17	9	66	9	781	85.4	5.86	-1.42715	-1.93667	-1.5666	-1.83263	-2.1169	-2.04017	-1.99372	-2.20878	-1.62831
4.34507	-0.659561	0.633071	P35226	FALSE	Polycomb complex protein BMI-1 OS=Homo sapiens OX=9606	BMI1	0.366929	4.76313	3.38524	4.76313	21	5	92	3	326	36.9	8.63	-2.43861	-2.34911	-2.46778	-3.16661	-3.25547	-3.0097	-2.604	-2.58475	-2.46195
1.25892	0.48845	1.40294	P35227	FALSE	Polycomb group RING finger protein 2 OS=Homo sapiens OX=9606	PCGF2	-0.402937	N/D	N/D	N/D	15	4	52	2	344	37.8	7.96	-3.97745	-5.02743	-4.48937	-4.04922	-3.89454	-3.91958	-4.5677	-4.29143	-4.30398
4.10234	0.145449	1.10607	P35232	FALSE	Prohibitin 1 OS=Homo sapiens OX=9606	PHB1	-0.106075	N/D	N/D	N/D	67	15	1006	15	272	29.8	5.76	4.16987	4.20497	4.18702	4.35792	4.36354	4.3425	4.24955	4.2314	4.21242
0.431946	0.0308932	1.02164	P35236	FALSE	Tyrosine-protein phosphatase non-receptor type 7 OS=Homo sapiens OX=9606	PTPN7	-0.0216444	N/D	N/D	N/D	44	12	384	12	360	40.5	6.79	1.31829	1.39929	1.38816	1.35282	1.40013	1.33842	1.27528	1.3194	1.29697
0.977953	-0.129694	0.914025	P35240	FALSE	Merlin OS=Homo sapiens OX=9606	NF2	0.085975	3.97341	N/D	N/D	10	6	73	5	595	69.6	6.47	-1.94851	-1.98603	-2.08479	-2.18169	-2.1687	-2.1801	-1.96667	-2.26265	-2.03418
0.13534	0.0518282	1.03658	P35241	FALSE	Radixin OS=Homo sapiens OX=9606	RDX	-0.0365777	N/D	N/D	N/D	48	32	1719	14	583	68.5	6.37	0.794514	0.365816	0.460564	0.26946	0.434896	0.64694	0.252063	0.298178	0.220488
1.64433	0.345687	1.27076	P35244	FALSE	Replication protein A 14 kDa subunit OS=Homo sapiens OX=9606	RPA3	-0.270756	N/D	N/D	N/D	59	5	227	5	121	13.6	5.08	0.89521	0.946972	0.970465	1.17524	1.64325	1.06115	0.914681	0.956106	1.00172
0.0763177	0.00469732	1.00326	P35249	TRUE	Replication factor C subunit 4 OS=Homo sapiens OX=9606	RFC4	-0.00326124	N/D	N/D	N/D	42	14	804	14	363	39.7	8.02	2.92155	2.95374	2.91185	2.91477	2.96255	2.97256	2.92125	2.97622	2.98699
0.814639	0.0351605	1.02467	P35250	FALSE	Replication factor C subunit 2 OS=Homo sapiens OX=9606	RFC2	-0.0246708	N/D	N/D	N/D	50	16	675	16	354	39.1	6.44	2.42513	2.41795	2.34715	2.45029	2.41164	2.40003	2.35285	2.37496	2.39493
1.60051	0.164231	1.12057	P35251	TRUE	Replication factor C subunit 1 OS=Homo sapiens OX=9606	RFC1	-0.120569	N/D	N/D	N/D	21	20	230	20	1148	128.2	9.36	-0.162046	-0.153399	-0.267424	-0.051671	-0.144765	-0.097414	-0.353015	-0.263744	-0.373461
1.6123	0.0641974	1.0455	P35268	FALSE	60S ribosomal protein L22 OS=Homo sapiens OX=9606	RPL22	-0.0455031	N/D	N/D	N/D	64	8	644	7	128	14.8	9.19	4.49039	4.52275	4.4812	4.52819	4.55567	4.59596	4.52997	4.44553	4.50464
0.32242	0.0345321	1.02422	P35269	TRUE	General transcription factor IIF subunit 1 OS=Homo sapiens OX=9606	GTF2F1	-0.0242246	N/D	N/D	N/D	34	16	503	16	517	58.2	7.49	1.7762	1.80128	1.74104	1.79158	1.88187	1.80346	1.77589	1.72836	1.92386
0.790911	0.05748	1.04065	P35270	FALSE	Sepiapterin reductase OS=Homo sapiens OX=9606	SPR	-0.0406465	N/D	N/D	N/D	31	8	272	8	261	28	8.05	0.576059	0.454851	0.453821	0.598359	0.525252	0.585917	0.504933	0.502127	0.582384
0.526605	-0.40579	0.754823	P35520	TRUE	Cystathionine beta-synthase OS=Homo sapiens OX=9606	CBS	0.245177	4.51164	5.72889	N/D	10	5	23	5	551	60.5	6.65	-0.829868	-0.0552311	0.084692	-1.19053	-0.57443	-1.18843	-1.15905	-0.314566	-1.19801
2.28431	0.675915	1.59761	P35573	TRUE	Glycogen debranching enzyme OS=Homo sapiens OX=9606	AGL	-0.59761	N/D	N/D	N/D	31	39	679	39	1532	174.7	6.76	1.79571	1.81468	1.86689	2.82775	2.78979	2.41332	2.06563	2.44324	2.02008
1.20365	-0.0303531	0.979181	P35579	FALSE	Myosin-9 OS=Homo sapiens OX=9606	MYH9	0.0208194	3.3276	N/D	N/D	57	125	7955	102	1960	226.4	5.6	7.41997	7.43405	7.43379	7.40858	7.37507	7.37082	7.40071	7.38615	7.41637
2.62653	0.0407948	1.02868	P35580	FALSE	Myosin-10 OS=Homo sapiens OX=9606	MYH10	-0.0286804	N/D	N/D	N/D	47	106	4190	82	1976	228.9	5.54	4.63666	4.65733	4.6492	4.69336	4.66631	4.70121	4.63753	4.64093	4.65536
0.845959	0.0545468	1.03853	P35606	FALSE	Coatomer subunit beta' OS=Homo sapiens OX=9606	COPB2	-0.0385328	N/D	N/D	N/D	43	33	1182	33	906	102.4	5.27	3.79616	3.89074	3.87125	3.89843	3.91127	3.82652	3.76818	3.80261	3.81624
0.925031	0.129692	1.09406	P35610	FALSE	Sterol O-acyltransferase 1 OS=Homo sapiens OX=9606	SOAT1	-0.0940598	N/D	N/D	N/D	13	7	127	7	550	64.7	8.94	-0.419893	-0.617384	-0.523829	-0.22051	-0.442748	-0.302299	-0.386077	-0.407114	-0.354967
0.446079	-0.0246364	0.983068	P35611	TRUE	Alpha-adducin OS=Homo sapiens OX=9606	ADD1	0.0169317	3.23612	N/D	N/D	36	20	654	19	737	80.9	5.83	1.65204	1.66745	1.65165	1.62211	1.62002	1.5816	1.59197	1.57372	1.65844
0.096002	0.0392537	1.02758	P35612	TRUE	Beta-adducin OS=Homo sapiens OX=9606	ADD2	-0.0275821	N/D	N/D	N/D	11	8	136	7	726	80.8	5.92	-2.13723	-1.79513	-1.70366	-1.51998	-1.65622	-1.93729	-1.61783	-1.68348	-1.52518
1.02105	0.0812952	1.05797	P35613	FALSE	Basigin OS=Homo sapiens OX=9606	BSG	-0.0579674	N/D	N/D	N/D	27	8	360	8	385	42.2	5.66	1.83331	2.01921	1.97919	2.06232	2.0546	2.00538	1.95958	2.01467	1.95087
0.93207	-0.168407	0.889825	P35626	TRUE	Beta-adrenergic receptor kinase 2 OS=Homo sapiens OX=9606	GRK3	0.110175	4.09278	N/D	N/D	23	14	230	8	688	79.7	7.62	-0.361649	-0.371021	-0.433661	-0.741754	-0.276338	-0.641571	-0.406638	-0.372147	-0.363768
4.45339	0.391279	1.31156	P35637	FALSE	RNA-binding protein FUS OS=Homo sapiens OX=9606	FUS	-0.311556	N/D	N/D	N/D	21	11	853	9	526	53.4	9.36	2.90246	2.89184	2.93119	3.37619	3.3613	3.33127	2.97765	3.02037	3.06633
0.219626	-0.0144537	0.990031	P35658	TRUE	Nuclear pore complex protein Nup214 OS=Homo sapiens OX=9606	NUP214	0.00996854	3.00298	N/D	N/D	19	31	670	31	2090	213.5	7.47	2.23401	2.23305	2.23752	2.21624	2.22634	2.18342	2.18225	2.16785	2.28405
0.901142	0.0468799	1.03303	P35659	FALSE	Protein DEK OS=Homo sapiens OX=9606	DEK	-0.0330284	N/D	N/D	N/D	43	16	501	16	375	42.6	8.56	3.3043	3.28296	3.19848	3.31967	3.33838	3.28932	3.2778	3.30949	3.24045
2.6387	0.248363	1.18786	P35754	FALSE	Glutaredoxin-1 OS=Homo sapiens OX=9606	GLRX	-0.187858	N/D	N/D	N/D	79	6	259	6	106	11.8	8.09	2.61744	2.59534	2.5421	2.95718	2.8375	2.89299	2.7146	2.76248	2.6532
0.077926	-0.0513514	0.965032	P35790	FALSE	Choline kinase alpha OS=Homo sapiens OX=9606	CHKA	0.0349681	3.55913	N/D	N/D	7	3	14	3	457	52.2	6.55	-3.27511	-2.82491	-3.57236	-3.36097	-3.21729	-3.40148	-2.76193	-3.63749	-3.57958
1.21979	0.0719225	1.05112	P35813	FALSE	Protein phosphatase 1A OS=Homo sapiens OX=9606	PPM1A	-0.0511164	N/D	N/D	N/D	46	14	611	14	382	42.4	5.36	1.70632	1.62541	1.68107	1.72986	1.6709	1.73723	1.59435	1.58308	1.6542
3.79917	-2.37246	0.193116	P35900	FALSE	Keratin, type I cytoskeletal 20 OS=Homo sapiens OX=9606	KRT20	0.806884	5.62099	1.75611	5.62099	5	2	5	1	424	48.5	5.69	-0.225828	-0.16268	-0.0365295	-2.94483	-2.91637	-3.13427	-1.1642	-1.14892	-1.01802
0.647403	-0.520467	0.697146	P35914	FALSE	Hydroxymethylglutaryl-CoA lyase, mitochondrial OS=Homo sapiens OX=9606	HMGCL	0.302854	4.63791	4.23715	N/D	15	4	73	4	325	34.3	8.54	-1.92631	-1.99224	-2.18413	-3.69857	-1.7394	-2.19762	-1.98624	-2.08381	-1.97567
2.38651	0.0632145	1.04479	P35998	FALSE	26S proteasome regulatory subunit 7 OS=Homo sapiens OX=9606	PSMC2	-0.0447911	N/D	N/D	N/D	64	28	1956	28	433	48.6	5.95	4.65978	4.66677	4.69485	4.69349	4.7381	4.74589	4.6614	4.64486	4.64802
2.7135	-0.169103	0.889395	P36402	FALSE	Transcription factor 7 OS=Homo sapiens OX=9606	TCF7	0.110605	4.09468	N/D	N/D	36	10	304	7	384	41.6	6.81	0.356936	0.313337	0.281277	0.137887	0.089488	0.0818424	0.239108	0.211876	0.230522
0.117251	-0.0471355	0.967856	P36404	FALSE	ADP-ribosylation factor-like protein 2 OS=Homo sapiens OX=9606	ARL2	0.0321439	3.52129	N/D	N/D	24	4	192	4	184	20.9	6.34	0.54627	0.467487	0.172218	0.120778	0.16503	0.171066	0.0763044	-0.0331364	-0.0325813
0.421277	0.0590466	1.04178	P36405	FALSE	ADP-ribosylation factor-like protein 3 OS=Homo sapiens OX=9606	ARL3	-0.0417771	N/D	N/D	N/D	41	6	171	6	182	20.4	7.24	1.12775	1.11157	1.18186	1.21559	1.37963	1.17096	1.31651	1.17803	1.26234
0.614448	0.0483063	1.03405	P36507	TRUE	Dual specificity mitogen-activated protein kinase kinase 2 OS=Homo sapiens OX=9606	MAP2K2	-0.0340503	N/D	N/D	N/D	39	15	628	9	400	44.4	6.55	1.13369	1.10227	1.14672	1.22498	1.21699	1.24949	1.21906	1.23839	1.25294
0.142585	-0.0587188	0.960116	P36508	FALSE	Zinc finger protein 76 OS=Homo sapiens OX=9606	ZNF76	0.0398836	3.61847	N/D	N/D	6	4	31	1	570	61.8	6.05	-5.02433	-5.67519	-5.47611	-5.36651	-5.40976	-5.69577	-5.31531	-5.63361	-5.46722
2.34662	0.103521	1.07439	P36542	FALSE	ATP synthase subunit gamma, mitochondrial OS=Homo sapiens OX=9606	ATP5F1C	-0.0743923	N/D	N/D	N/D	23	7	803	7	298	33	9.22	3.85629	3.93508	3.95227	3.98102	4.02816	4.05394	3.9123	3.90528	3.94388
0.25165	-0.0501663	0.965825	P36543	FALSE	V-type proton ATPase subunit E 1 OS=Homo sapiens OX=9606	ATP6V1E1	0.034175	3.54881	N/D	N/D	41	12	353	12	226	26.1	8	1.92298	1.63704	1.67563	1.61706	1.59113	1.61738	1.55155	1.57641	1.58853
1.50966	0.0726813	1.05167	P36551	FALSE	Oxygen-dependent coproporphyrinogen-III oxidase, mitochondrial OS=Homo sapiens OX=9606	CPOX	-0.0516694	N/D	N/D	N/D	40	16	417	16	454	50.1	8.25	1.10006	1.09924	1.14256	1.24429	1.14911	1.16682	1.15467	1.06765	1.12019
0.263951	0.0117297	1.00816	P36578	FALSE	60S ribosomal protein L4 OS=Homo sapiens OX=9606	RPL4	-0.00816356	N/D	N/D	N/D	47	27	2747	27	427	47.7	11.06	6.40165	6.3763	6.38591	6.43922	6.4044	6.37242	6.43381	6.37176	6.39226
0.0547587	-0.0272854	0.981265	P36639	FALSE	Oxidized purine nucleoside triphosphate hydrolase OS=Homo sapiens OX=9606	NUDT1	0.0187351	3.28087	N/D	N/D	31	5	198	5	156	17.9	5.08	1.16041	1.14698	1.08158	1.18457	0.686942	1.22845	0.606317	1.16599	1.20237
0.980458	-0.045856	0.968715	P36776	FALSE	Lon protease homolog, mitochondrial OS=Homo sapiens OX=9606	LONP1	0.0312851	3.50914	N/D	N/D	38	30	1060	30	959	106.4	6.39	3.59848	3.62262	3.63853	3.53777	3.54813	3.5372	3.56324	3.52774	3.57071
2.2793	0.0682928	1.04848	P36871	FALSE	Phosphoglucomutase-1 OS=Homo sapiens OX=9606	PGM1	-0.0484752	N/D	N/D	N/D	51	29	1189	29	562	61.4	6.76	3.49294	3.50242	3.46355	3.5409	3.5437	3.58943	3.4806	3.47212	3.52669
5.9637	-0.512426	0.701042	P36873	TRUE	Serine/threonine-protein phosphatase PP1-gamma catalytic subunit OS=Homo sapiens OX=9606	PPP1CC	0.298958	4.62987	4.30819	4.62987	61	18	1002	5	323	37	6.54	1.30767	1.36835	1.32648	0.768804	0.795634	0.901426	1.28803	1.34959	1.36617
2.95522	0.110118	1.07932	P36915	FALSE	Guanine nucleotide-binding protein-like 1 OS=Homo sapiens OX=9606	GNL1	-0.0793168	N/D	N/D	N/D	29	17	540	17	607	68.6	5.8	2.28371	2.30723	2.29261	2.4489	2.43869	2.35979	2.31839	2.32669	2.30541
2.28422	0.121776	1.08807	P36954	FALSE	DNA-directed RNA polymerase II subunit RPB9 OS=Homo sapiens OX=9606	POLR2I	-0.0880736	N/D	N/D	N/D	66	6	214	6	125	14.5	5.14	0.685812	0.657848	0.684454	0.860291	0.776465	0.835649	0.771848	0.676918	0.737276
0.62337	-0.186877	0.878505	P36956	TRUE	Sterol regulatory element-binding protein 1 OS=Homo sapiens OX=9606	SREBF1	0.121495	4.14081	146.704	N/D	3	3	8	2	1147	121.6	8.13	-4.90513	-4.8531	-5.09236	-5.22636	-4.98472	-5.32001	-5.09486	-4.69245	-5.30304
1.4364	0.105663	1.07599	P36957	FALSE	Dihydrolipoyllysine-residue succinyltransferase component of 2-oxoglutarate dehydrogenase complex, mitochondrial OS=Homo sapiens OX=9606	DLST	-0.0759891	N/D	N/D	N/D	23	8	150	8	453	48.7	8.95	0.287077	0.308514	0.312056	0.41653	0.374049	0.361238	0.334657	0.14966	0.277691
1.42659	0.130181	1.09443	P36969	FALSE	Phospholipid hydroperoxide glutathione peroxidase OS=Homo sapiens OX=9606	GPX4	-0.0944311	N/D	N/D	N/D	39	7	243	7	197	22.2	8.37	0.610676	0.63468	0.759321	0.710807	0.806617	0.781227	0.522664	0.609924	0.678949
0.163183	-0.0344431	0.976409	P37108	FALSE	Signal recognition particle 14 kDa protein OS=Homo sapiens OX=9606	SRP14	0.0235914	3.38312	N/D	N/D	47	8	626	8	136	14.6	10.04	4.21586	4.42432	4.49639	4.29539	4.45703	4.21245	4.30897	4.43644	4.25442
0.375329	0.0204005	1.01424	P37198	FALSE	Nuclear pore glycoprotein p62 OS=Homo sapiens OX=9606	NUP62	-0.014241	N/D	N/D	N/D	17	7	229	7	522	53.2	5.31	1.28903	1.22017	1.31118	1.29846	1.30762	1.29755	1.32211	1.24501	1.29733
0.228738	0.0338124	1.02371	P37235	FALSE	Hippocalcin-like protein 1 OS=Homo sapiens OX=9606	HPCAL1	-0.0237137	N/D	N/D	N/D	51	8	222	8	193	22.3	5.35	0.378748	0.300932	0.356211	0.233079	0.404796	0.352968	0.201165	0.186895	0.35486
2.83093	0.141518	1.10307	P37268	FALSE	Squalene synthase OS=Homo sapiens OX=9606	FDFT1	-0.103065	N/D	N/D	N/D	62	25	808	25	417	48.1	6.54	3.61131	3.57846	3.62781	3.78083	3.69006	3.7102	3.6058	3.5345	3.55517
0.0508474	0.0164088	1.01144	P37275	TRUE	Zinc finger E-box-binding homeobox 1 OS=Homo sapiens OX=9606	ZEB1	-0.0114386	N/D	N/D	N/D	13	11	155	11	1124	124	4.94	-1.28811	-1.05602	-1.23256	-1.00428	-1.06752	-1.39258	-1.28286	-0.948948	-1.21872
2.4478	0.0976437	1.07002	P37802	FALSE	Transgelin-2 OS=Homo sapiens OX=9606	TAGLN2	-0.0700244	N/D	N/D	N/D	72	15	1201	15	199	22.4	8.25	4.8743	4.95001	4.95929	5.02912	5.01658	4.9994	4.92876	4.87306	4.91892
2.69159	0.0580862	1.04108	P37837	FALSE	Transaldolase OS=Homo sapiens OX=9606	TALDO1	-0.0410838	N/D	N/D	N/D	40	15	963	15	337	37.5	6.81	4.46348	4.48364	4.4477	4.534	4.52643	4.54919	4.49839	4.48819	4.4893
0.388489	0.0226127	1.0158	P38117	FALSE	Electron transfer flavoprotein subunit beta OS=Homo sapiens OX=9606	ETFB	-0.0157974	N/D	N/D	N/D	56	17	738	17	255	27.8	8.1	3.29919	3.23723	3.18109	3.27157	3.22685	3.24587	3.21606	3.21791	3.2014
5.58149	-0.664167	0.631053	P38159	TRUE	RNA-binding motif protein, X chromosome OS=Homo sapiens OX=9606	RBMX	0.368947	4.7669	3.3654	4.7669	49	23	2292	7	391	42.3	10.05	2.85422	2.88766	3.03139	2.19006	2.31167	2.20965	2.88062	2.91881	2.83506
0.62625	-0.186153	0.878947	P38398	FALSE	Breast cancer type 1 susceptibility protein OS=Homo sapiens OX=9606	BRCA1	0.121053	4.13901	163.832	N/D	7	7	22	7	1863	207.6	5.41	-2.42263	-2.54529	-2.64668	-2.511	-2.79578	-2.78744	-2.76577	-2.5575	-2.13366
0.0677518	-0.0163239	0.988749	P38432	FALSE	Coilin OS=Homo sapiens OX=9606	COIL	0.0112511	3.05611	N/D	N/D	3	2	5	2	576	62.6	9.07	-4.7201	-4.73353	-4.61745	-4.64418	-4.7511	-4.59622	-4.80791	-4.429	-4.57709
0.0770225	-0.0209788	0.985564	P38571	FALSE	Lysosomal acid lipase/cholesteryl ester hydrolase OS=Homo sapiens OX=9606	LIPA	0.0144362	3.16577	N/D	N/D	13	4	134	4	399	45.4	6.92	-0.613686	-0.272434	-0.438402	-0.492963	-0.499843	-0.562731	-0.373668	-0.704281	-0.582729
0.417071	0.0161901	1.01129	P38606	FALSE	V-type proton ATPase catalytic subunit A OS=Homo sapiens OX=9606	ATP6V1A	-0.0112853	N/D	N/D	N/D	34	20	913	20	617	68.3	5.52	3.16037	3.20871	3.20345	3.21585	3.1663	3.19363	3.15889	3.15102	3.172
0.390518	0.0186365	1.013	P38646	FALSE	Stress-70 protein, mitochondrial OS=Homo sapiens OX=9606	HSPA9	-0.0130017	N/D	N/D	N/D	66	43	2851	42	679	73.6	6.16	6.13997	6.11564	6.15053	6.14281	6.12671	6.11835	6.09483	6.054	6.10895
2.63636	-0.157029	0.89687	P38919	FALSE	Eukaryotic initiation factor 4A-III OS=Homo sapiens OX=9606	EIF4A3	0.10313	4.06065	N/D	N/D	52	24	1055	20	411	46.8	6.73	4.12752	4.07095	4.08664	3.86773	3.90782	3.92135	4.05254	3.97105	4.02728
4.39522	-0.375591	0.77079	P38935	FALSE	DNA-binding protein SMUBP-2 OS=Homo sapiens OX=9606	IGHMBP2	0.22921	4.4733	6.41271	N/D	20	16	153	16	993	109.1	8.97	0.593102	0.545809	0.560181	0.242854	0.264985	0.243135	0.664506	0.679897	0.712
0.14943	-0.0175401	0.987916	P39019	FALSE	40S ribosomal protein S19 OS=Homo sapiens OX=9606	RPS19	0.0120843	3.0875	N/D	N/D	66	15	1590	15	145	16.1	10.32	5.73259	5.86762	5.90108	5.80697	5.86188	5.76116	5.78781	5.89078	5.78538
0.0786987	-0.0072999	0.994953	P39023	TRUE	60S ribosomal protein L3 OS=Homo sapiens OX=9606	RPL3	0.00504713	2.70524	N/D	N/D	55	26	2427	26	403	46.1	10.18	5.91211	5.98057	5.92373	5.93532	5.86379	5.87569	5.87881	5.8541	5.84407
0.498796	0.0291502	1.02041	P39656	FALSE	Dolichyl-diphosphooligosaccharide--protein glycosyltransferase 48 kDa subunit OS=Homo sapiens OX=9606	DDOST	-0.0204109	N/D	N/D	N/D	38	13	564	13	456	50.8	6.55	3.64461	3.6481	3.55929	3.60147	3.69363	3.63614	3.63482	3.59699	3.60377
0.103661	-0.0376773	0.974222	P39687	FALSE	Acidic leucine-rich nuclear phosphoprotein 32 family member A OS=Homo sapiens OX=9606	ANP32A	0.0257778	3.42259	N/D	N/D	37	11	1309	7	249	28.6	4.09	5.45278	5.46156	5.4189	5.3087	5.12344	5.37291	4.95741	5.41048	5.13501
0.314483	-0.0134699	0.990707	P39748	FALSE	Flap endonuclease 1 OS=Homo sapiens OX=9606	FEN1	0.00929314	2.97222	N/D	N/D	50	17	748	17	380	42.6	8.62	3.65106	3.59277	3.61244	3.57828	3.58873	3.60979	3.6116	3.56275	3.6038
0.947642	-0.128905	0.914525	P39880	FALSE	Homeobox protein cut-like 1 OS=Homo sapiens OX=9606	CUX1	0.085475	3.97064	N/D	N/D	13	17	218	4	1505	164.1	5.9	-2.11311	-2.2846	-2.38218	-2.30031	-2.39559	-2.5165	-2.21873	-2.30285	-2.34988
2.12678	0.0913914	1.0654	P40121	FALSE	Macrophage-capping protein OS=Homo sapiens OX=9606	CAPG	-0.0653972	N/D	N/D	N/D	43	10	547	10	348	38.5	6.19	3.23943	3.20099	3.2235	3.36575	3.32641	3.33657	3.31223	3.26517	3.2678
0.974978	-0.0283647	0.980531	P40222	TRUE	Alpha-taxilin OS=Homo sapiens OX=9606	TXLNA	0.0194689	3.29788	N/D	N/D	53	24	932	23	546	61.9	6.52	2.94823	2.98882	2.93999	2.95398	2.915	2.95018	2.97305	2.96399	2.99443
0.948733	0.0710886	1.05051	P40227	FALSE	T-complex protein 1 subunit zeta OS=Homo sapiens OX=9606	CCT6A	-0.0505091	N/D	N/D	N/D	47	25	2441	20	531	58	6.68	5.79624	5.86433	5.87036	5.87218	5.9491	5.82186	5.74635	5.82078	5.76171
0.675664	0.0588028	1.0416	P40306	TRUE	Proteasome subunit beta type-10 OS=Homo sapiens OX=9606	PSMB10	-0.041601	N/D	N/D	N/D	44	9	253	9	273	28.9	7.81	0.467314	0.592873	0.494184	0.482894	0.656116	0.589434	0.528605	0.484943	0.53615
0.268199	-0.0314294	0.97845	P40337	FALSE	von Hippel-Lindau disease tumor suppressor OS=Homo sapiens OX=9606	VHL	0.0215497	3.3429	N/D	N/D	15	3	66	3	213	24.1	4.73	-1.35754	-1.38507	-1.53893	-1.52582	-1.47236	-1.43765	-1.48898	-1.51559	-1.39698
0.462297	0.0294992	1.02066	P40394	FALSE	All-trans-retinol dehydrogenase [NAD(+)] ADH7 OS=Homo sapiens OX=9606	ADH7	-0.0206578	N/D	N/D	N/D	4	2	90	2	386	41.5	7.85	1.87591	1.88538	1.90715	1.90796	1.92708	1.95708	1.84686	1.90878	1.98316
0.193405	0.388904	1.3094	P40425	TRUE	Pre-B-cell leukemia transcription factor 2 OS=Homo sapiens OX=9606	PBX2	-0.309398	N/D	N/D	N/D	9	3	29	3	430	45.9	7.56	-3.67385	-5.915	-5.91668	-5.08932	-4.50807	-4.55709	-3.2055	-6.31134	-5.62004
0.720794	0.0578084	1.04088	P40429	FALSE	60S ribosomal protein L13a OS=Homo sapiens OX=9606	RPL13A	-0.0408834	N/D	N/D	N/D	38	10	1000	10	203	23.6	10.93	4.36687	4.43941	4.40924	4.38892	4.42634	4.42957	4.33709	4.25304	4.33718
0.172332	-0.0238805	0.983584	P40616	FALSE	ADP-ribosylation factor-like protein 1 OS=Homo sapiens OX=9606	ARL1	0.0164164	3.22247	N/D	N/D	30	4	146	4	181	20.4	5.72	0.125862	0.131071	0.339706	0.175328	0.192103	0.110132	0.230477	0.131672	0.139622
0.0780858	0.0090464	1.00629	P40692	FALSE	DNA mismatch repair protein Mlh1 OS=Homo sapiens OX=9606	MLH1	-0.00629018	N/D	N/D	N/D	29	21	474	21	756	84.5	5.72	1.07062	1.1006	1.04056	1.06598	0.956614	1.14871	1.05378	1.01515	1.00761
1.3529	0.0639869	1.04535	P40763	FALSE	Signal transducer and activator of transcription 3 OS=Homo sapiens OX=9606	STAT3	-0.0453506	N/D	N/D	N/D	37	22	616	22	770	88	6.3	2.15668	2.19112	2.23384	2.23189	2.27369	2.22177	2.20884	2.12422	2.1561
1.73916	0.139413	1.10146	P40818	TRUE	Ubiquitin carboxyl-terminal hydrolase 8 OS=Homo sapiens OX=9606	USP8	-0.101457	N/D	N/D	N/D	14	14	219	14	1118	127.4	8.51	0.164167	0.129921	0.109274	0.381991	0.336242	0.253378	0.283889	0.221746	0.197748
1.14288	0.0682349	1.04843	P40855	TRUE	Peroxisomal biogenesis factor 19 OS=Homo sapiens OX=9606	PEX19	-0.0484332	N/D	N/D	N/D	36	8	250	8	299	32.8	4.34	0.297934	0.389021	0.402397	0.41664	0.382461	0.39662	0.28538	0.323812	0.283487
2.39074	0.0650907	1.04615	P40925	FALSE	Malate dehydrogenase, cytoplasmic OS=Homo sapiens OX=9606	MDH1	-0.0461507	N/D	N/D	N/D	38	12	863	12	334	36.4	7.36	4.17302	4.16756	4.16447	4.22239	4.26285	4.24894	4.18017	4.22416	4.16844
1.92059	0.0399747	1.0281	P40926	FALSE	Malate dehydrogenase, mitochondrial OS=Homo sapiens OX=9606	MDH2	-0.0280958	N/D	N/D	N/D	66	18	2084	18	338	35.5	8.68	5.92197	5.92027	5.92377	5.97623	5.94752	5.96051	5.93476	5.88879	5.93911
0.115448	0.0141085	1.00983	P40937	FALSE	Replication factor C subunit 5 OS=Homo sapiens OX=9606	RFC5	-0.00982724	N/D	N/D	N/D	51	17	547	17	340	38.5	7.2	2.70339	2.63263	2.55359	2.63215	2.6333	2.66137	2.69851	2.5209	2.65994
0.870393	0.0626655	1.04439	P40938	FALSE	Replication factor C subunit 3 OS=Homo sapiens OX=9606	RFC3	-0.0443936	N/D	N/D	N/D	50	16	497	16	356	40.5	8.34	2.2285	2.25941	2.17089	2.34894	2.21183	2.24682	2.23121	2.14386	2.20531
2.73283	-0.206826	0.866441	P40939	FALSE	Trifunctional enzyme subunit alpha, mitochondrial OS=Homo sapiens OX=9606	HADHA	0.133559	4.18793	38.5768	N/D	40	25	950	25	763	82.9	9.04	4.30211	4.14978	4.20827	4.02992	4.01543	3.90988	4.17643	4.15318	4.16164
1.35326	0.0442541	1.03115	P41091	FALSE	Eukaryotic translation initiation factor 2 subunit 3 OS=Homo sapiens OX=9606	EIF2S3	-0.0311499	N/D	N/D	N/D	58	25	1298	25	472	51.1	8.4	4.54215	4.51191	4.57882	4.58062	4.57841	4.60062	4.50996	4.53769	4.57323
0.32385	-0.520618	0.697073	P41134	FALSE	DNA-binding protein inhibitor ID-1 OS=Homo sapiens OX=9606	ID1	0.302927	4.63806	4.23584	N/D	25	3	31	3	155	16.1	6.99	-1.60055	0.219105	0.860588	-1.27111	-0.047452	-1.62687	-1.17018	0.251482	-1.3276
0.0879736	-0.0102102	0.992948	P41208	FALSE	Centrin-2 OS=Homo sapiens OX=9606	CETN2	0.00705218	2.8514	N/D	N/D	9	2	98	2	172	19.7	5	-0.958048	-1.00214	-0.996964	-0.991445	-1.00833	-0.965149	-1.06641	-0.989271	-0.855749
2.13851	0.279569	1.21383	P41212	FALSE	Transcription factor ETV6 OS=Homo sapiens OX=9606	ETV6	-0.213832	N/D	N/D	N/D	19	6	83	6	452	53	7.43	-1.49966	-1.46588	-1.39241	-1.20303	-1.12657	-1.16614	-1.47519	-1.60058	-1.23518
0.0806694	-0.00820684	0.994328	P41214	TRUE	Eukaryotic translation initiation factor 2D OS=Homo sapiens OX=9606	EIF2D	0.0056724	2.75624	N/D	N/D	34	16	385	16	584	64.7	7.65	0.745937	0.63604	0.755281	0.715375	0.69324	0.66069	0.663369	0.634771	0.752453
1.68707	0.206689	1.15404	P41223	FALSE	Protein BUD31 homolog OS=Homo sapiens OX=9606	BUD31	-0.154036	N/D	N/D	N/D	49	7	227	7	144	17	8.82	0.749733	0.617424	0.571701	0.931069	0.854161	0.852421	0.54042	0.730324	0.825569
0.940276	0.0504527	1.03559	P41227	FALSE	N-alpha-acetyltransferase 10 OS=Homo sapiens OX=9606	NAA10	-0.0355898	N/D	N/D	N/D	76	17	565	17	235	26.4	5.64	2.70222	2.72183	2.66772	2.73276	2.72234	2.68276	2.64878	2.61483	2.61764
0.141233	-0.036558	0.974978	P41229	TRUE	Lysine-specific demethylase 5C OS=Homo sapiens OX=9606	KDM5C	0.0250217	3.40932	N/D	N/D	4	6	21	6	1560	175.6	5.58	-1.69112	-1.77876	-1.65205	-1.70213	-2.04512	-1.72991	-1.91443	-1.7696	-1.92899
0.4686	-0.0775005	0.947698	P41236	FALSE	Protein phosphatase inhibitor 2 OS=Homo sapiens OX=9606	PPP1R2	0.0523019	3.74185	N/D	N/D	35	6	229	6	205	23	4.74	1.36238	1.38438	1.34373	1.3867	1.38927	1.42236	1.61067	1.56097	1.59954
1.72075	0.088491	1.06326	P41240	FALSE	Tyrosine-protein kinase CSK OS=Homo sapiens OX=9606	CSK	-0.0632574	N/D	N/D	N/D	47	18	624	18	450	50.7	7.06	2.55257	2.56832	2.65343	2.66182	2.63389	2.71105	2.59599	2.53177	2.58051
2.02466	0.0611835	1.04332	P41250	FALSE	Glycine--tRNA ligase OS=Homo sapiens OX=9606	GARS1	-0.0433213	N/D	N/D	N/D	44	29	1265	29	739	83.1	7.03	4.3058	4.33388	4.32765	4.38538	4.37908	4.33347	4.29315	4.27377	4.29451
2.5076	0.0639755	1.04534	P41252	FALSE	Isoleucine--tRNA ligase, cytoplasmic OS=Homo sapiens OX=9606	IARS1	-0.0453423	N/D	N/D	N/D	48	55	2292	55	1262	144.4	6.15	5.44033	5.4595	5.44137	5.49703	5.49049	5.53353	5.42322	5.4228	5.47102
0.601061	0.144221	1.10513	P41440	TRUE	Reduced folate transporter OS=Homo sapiens OX=9606	SLC19A1	-0.105134	N/D	N/D	N/D	6	3	45	3	591	64.8	8.95	-2.61136	-2.64954	-2.23621	-2.30914	-2.19732	-2.23456	-2.23911	-2.33783	-2.27331
0.94962	-0.0601452	0.959168	P41567	FALSE	Eukaryotic translation initiation factor 1 OS=Homo sapiens OX=9606	EIF1	0.0408324	3.62911	N/D	N/D	77	7	362	7	113	12.7	7.44	2.6861	2.7184	2.7251	2.66081	2.70497	2.7156	2.77416	2.79763	2.82222
0.167014	-0.0293501	0.979862	P41732	FALSE	Tetraspanin-7 OS=Homo sapiens OX=9606	TSPAN7	0.0201384	3.31286	N/D	N/D	6	1	67	1	249	27.6	7.2	-0.867464	-1.14623	-1.09676	-1.15403	-1.13409	-1.07179	-1.14829	-1.15201	-1.13298
0.0072143	-0.0063351	0.995618	P41743	FALSE	Protein kinase C iota type OS=Homo sapiens OX=9606	PRKCI	0.00438153	2.64353	N/D	N/D	19	6	138	6	596	68.2	5.85	-0.467218	-1.3108	-1.1418	-1.37353	-1.13658	-0.428856	-1.22328	-1.20333	-0.493498
1.33791	0.430638	1.34783	P42025	TRUE	Beta-centractin OS=Homo sapiens OX=9606	ACTR1B	-0.34783	N/D	N/D	N/D	32	11	473	2	376	42.3	6.4	-3.78304	-3.17005	-3.44695	-3.09933	-3.1639	-3.39684	-3.86949	-3.81069	-3.82374
0.496845	-0.0392874	0.973135	P42166	TRUE	Lamina-associated polypeptide 2, isoform alpha OS=Homo sapiens OX=9606	TMPO	0.0268645	3.44101	N/D	N/D	46	29	1890	17	694	75.4	7.66	3.20308	3.16903	3.11562	3.10079	3.11388	3.22591	3.24637	3.18649	3.19628
2.14297	-0.128247	0.914942	P42167	TRUE	Lamina-associated polypeptide 2, isoforms beta/gamma OS=Homo sapiens OX=9606	TMPO	0.0850576	3.96832	N/D	N/D	58	24	1646	12	454	50.6	9.38	3.67162	3.6686	3.60538	3.51214	3.55192	3.45403	3.64828	3.66218	3.54961
0.141061	-0.0196919	0.986443	P42224	FALSE	Signal transducer and activator of transcription 1-alpha/beta OS=Homo sapiens OX=9606	STAT1	0.0135567	3.13808	N/D	N/D	35	23	530	23	750	87.3	6.05	2.22631	2.25727	2.34406	2.21114	2.26379	2.13661	2.19501	2.10075	2.21783
0.230562	-0.042816	0.970758	P42226	FALSE	Signal transducer and activator of transcription 6 OS=Homo sapiens OX=9606	STAT6	0.0292417	3.47889	N/D	N/D	17	13	280	13	847	94.1	6.23	0.382135	0.404379	0.481266	0.312753	0.392058	0.174713	0.211953	0.229548	0.306664
4.79823	0.0824663	1.05883	P42285	FALSE	Exosome RNA helicase MTR4 OS=Homo sapiens OX=9606	MTREX	-0.0588266	N/D	N/D	N/D	34	30	1449	30	1042	117.7	6.52	3.53031	3.52155	3.54069	3.59798	3.61472	3.62332	3.54295	3.52402	3.51773
0.331304	-0.0415463	0.971613	P42331	TRUE	Rho GTPase-activating protein 25 OS=Homo sapiens OX=9606	ARHGAP25	0.028387	3.46563	N/D	N/D	25	14	260	14	645	73.4	6.37	0.0275097	0.0555534	0.134207	-0.0685873	-0.0771704	0.0804043	-0.0227652	-0.00544167	-0.0704918
0.0594322	-0.0230581	0.984144	P42336	FALSE	Phosphatidylinositol 4,5-bisphosphate 3-kinase catalytic subunit alpha isoform OS=Homo sapiens OX=9606	PIK3CA	0.0158556	3.20712	N/D	N/D	7	8	93	8	1068	124.2	7.23	-1.80711	-1.76843	-1.94129	-2.05331	-1.49312	-1.84835	-1.50262	-1.81883	-1.81295
0.255176	0.0292754	1.0205	P42338	FALSE	Phosphatidylinositol 4,5-bisphosphate 3-kinase catalytic subunit beta isoform OS=Homo sapiens OX=9606	PIK3CB	-0.0204995	N/D	N/D	N/D	2	2	19	2	1070	122.7	7.09	0.500244	0.552691	0.609564	0.72144	0.578792	0.534773	0.623551	0.629528	0.578779
0.783079	0.0493242	1.03478	P42345	FALSE	Serine/threonine-protein kinase mTOR OS=Homo sapiens OX=9606	MTOR	-0.0347801	N/D	N/D	N/D	16	38	493	38	2549	288.7	7.17	2.57522	2.67382	2.5247	2.6593	2.6692	2.63228	2.63756	2.59518	2.61912
1.41807	-0.0460766	0.968567	P42356	FALSE	Phosphatidylinositol 4-kinase alpha OS=Homo sapiens OX=9606	PI4KA	0.0314332	3.51126	N/D	N/D	11	21	133	21	2102	236.7	7.06	1.01188	0.988077	0.968576	0.967582	0.940562	0.971762	1.0374	1.03854	0.991798
0.210188	0.0307641	1.02155	P42566	TRUE	Epidermal growth factor receptor substrate 15 OS=Homo sapiens OX=9606	EPS15	-0.021553	N/D	N/D	N/D	29	21	476	21	896	98.6	4.64	0.842278	0.744862	0.891809	0.914651	0.929204	0.702141	0.805789	0.85763	0.765039
0.0130765	0.00225719	1.00157	P42574	FALSE	Caspase-3 OS=Homo sapiens OX=9606	CASP3	-0.00156579	N/D	N/D	N/D	31	8	242	7	277	31.6	6.54	1.27317	1.23239	1.18843	1.13624	1.12631	1.19337	1.03874	1.06589	1.09968
3.35388	0.0891639	1.06375	P42575	FALSE	Caspase-2 OS=Homo sapiens OX=9606	CASP2	-0.0637535	N/D	N/D	N/D	40	14	449	14	452	50.7	6.81	1.69767	1.72129	1.7458	1.8172	1.80631	1.80729	1.75373	1.70663	1.70149
0.0755506	-0.00805426	0.994433	P42677	FALSE	40S ribosomal protein S27 OS=Homo sapiens OX=9606	RPS27	0.00556723	2.74806	N/D	N/D	38	3	597	1	84	9.5	9.45	3.3583	3.32451	3.30621	3.35656	3.29896	3.36897	3.4404	3.39164	3.27624
4.28373	-1.26215	0.416922	P42684	TRUE	Tyrosine-protein kinase ABL2 OS=Homo sapiens OX=9606	ABL2	0.583078	5.14567	2.22409	5.14567	5	5	43	3	1182	128.3	8.07	-4.32047	-4.19221	-4.1145	-5.10722	-5.60642	-5.51419	-3.82104	-4.25114	-4.18339
0.530664	0.0457225	1.0322	P42694	TRUE	Probable helicase with zinc finger domain OS=Homo sapiens OX=9606	HELZ	-0.0322	N/D	N/D	N/D	10	17	186	17	1942	218.8	7.42	-0.432287	-0.494789	-0.522549	-0.445704	-0.522801	-0.339989	-0.45135	-0.509356	-0.480993
1.46111	-0.124885	0.917077	P42695	FALSE	Condensin-2 complex subunit D3 OS=Homo sapiens OX=9606	NCAPD3	0.0829231	3.95627	N/D	N/D	16	22	381	22	1498	168.8	7.5	0.926157	0.945009	0.955542	0.919209	0.795222	0.729843	0.961417	0.847351	1.00239
0.436026	-0.017173	0.988167	P42696	FALSE	RNA-binding protein 34 OS=Homo sapiens OX=9606	RBM34	0.0118328	3.07826	N/D	N/D	44	21	465	21	430	48.5	10.11	1.67167	1.6968	1.64776	1.65595	1.62184	1.69707	1.6715	1.69342	1.67158
0.918535	0.0424848	1.02989	P42704	FALSE	Leucine-rich PPR motif-containing protein, mitochondrial OS=Homo sapiens OX=9606	LRPPRC	-0.0298861	N/D	N/D	N/D	43	60	2367	60	1394	157.8	6.13	5.14842	5.09326	5.15261	5.18836	5.18208	5.14949	5.10435	5.09829	5.18802
0.791105	0.0785569	1.05596	P42765	FALSE	3-ketoacyl-CoA thiolase, mitochondrial OS=Homo sapiens OX=9606	ACAA2	-0.0559612	N/D	N/D	N/D	44	15	409	15	397	41.9	8.09	0.730537	0.85965	0.769335	0.975842	0.912229	0.8911	0.901948	0.914005	0.911526
1.99854	0.0776299	1.05528	P42766	FALSE	60S ribosomal protein L35 OS=Homo sapiens OX=9606	RPL35	-0.055283	N/D	N/D	N/D	37	6	1006	6	123	14.5	11.05	4.76118	4.72672	4.73447	4.85969	4.83068	4.8203	4.80184	4.73036	4.80098
6.66263	-1.51102	0.350863	P42768	TRUE	Wiskott-Aldrich syndrome protein OS=Homo sapiens OX=9606	WAS	0.649137	5.2672	2.0513	5.2672	27	10	115	10	502	52.9	6.64	0.338989	0.280371	0.260786	-1.06394	-1.1106	-1.4026	0.395907	0.274046	0.361742
1.66987	-0.390836	0.762687	P42773	FALSE	Cyclin-dependent kinase 4 inhibitor C OS=Homo sapiens OX=9606	CDKN2C	0.237313	4.49297	6.04302	N/D	10	2	16	2	168	18.1	6.52	-2.49085	-2.16815	-2.25726	-2.74365	-2.71783	-3.0477	-2.64194	-2.5672	-2.54796
1.59092	0.072571	1.05159	P42785	FALSE	Lysosomal Pro-X carboxypeptidase OS=Homo sapiens OX=9606	PRCP	-0.051589	N/D	N/D	N/D	20	10	205	10	496	55.8	7.21	0.6602	0.607664	0.589199	0.669917	0.65886	0.652233	0.55997	0.539022	0.570539
0.756128	-0.0554986	0.962262	P42858	TRUE	Huntingtin OS=Homo sapiens OX=9606	HTT	0.0377382	3.59349	N/D	N/D	14	35	434	35	3142	347.4	6.2	0.755816	0.797348	0.835485	0.634292	0.795772	0.757256	0.75327	0.792143	0.773567
1.13732	0.324372	1.25212	P42892	TRUE	Endothelin-converting enzyme 1 OS=Homo sapiens OX=9606	ECE1	-0.252119	N/D	N/D	N/D	8	6	81	6	770	87.1	5.88	-1.98688	-2.02211	-1.49063	-1.33418	-1.49198	-1.282	-1.60603	-1.45803	-1.59888
0.405474	0.0677737	1.0481	P42898	FALSE	Methylenetetrahydrofolate reductase OS=Homo sapiens OX=9606	MTHFR	-0.048098	N/D	N/D	N/D	12	7	64	7	656	74.5	5.34	-1.57549	-1.30536	-1.50262	-1.4716	-1.35914	-1.48486	-1.48936	-1.65682	-1.50819
0.150407	0.0244784	1.01711	P43007	FALSE	Neutral amino acid transporter A OS=Homo sapiens OX=9606	SLC1A4	-0.0171119	N/D	N/D	N/D	22	7	68	7	532	55.7	6.25	-1.25012	-1.43001	-1.32006	-1.30479	-1.32382	-1.4475	-1.42646	-1.36067	-1.5118
1.09151	0.119353	1.08625	P43034	TRUE	Platelet-activating factor acetylhydrolase IB subunit beta OS=Homo sapiens OX=9606	PAFAH1B1	-0.0862479	N/D	N/D	N/D	64	23	1052	22	410	46.6	7.37	3.02618	2.90409	3.01913	3.04401	3.09373	2.97466	2.83524	2.80891	2.91512
1.23077	0.0300937	1.02108	P43243	FALSE	Matrin-3 OS=Homo sapiens OX=9606	MATR3	-0.0210784	N/D	N/D	N/D	50	45	4105	45	847	94.6	6.25	5.85994	5.83246	5.81128	5.87674	5.87356	5.87359	5.83317	5.86225	5.86811
0.0693677	0.0205925	1.01438	P43250	TRUE	G protein-coupled receptor kinase 6 OS=Homo sapiens OX=9606	GRK6	-0.014376	N/D	N/D	N/D	24	11	284	10	576	65.9	8	-0.304911	-0.382925	-0.0972462	-0.277642	-0.236613	-0.515333	-0.411429	-0.452114	-0.534107
0.738337	-0.199161	0.871057	P43307	FALSE	Translocon-associated protein subunit alpha OS=Homo sapiens OX=9606	SSR1	0.128943	4.17035	53.4883	N/D	20	4	122	4	286	32.2	4.49	1.36962	1.40363	1.73017	1.50242	1.03739	1.11404	1.4022	1.27922	1.31783
0.65203	-0.212616	0.862971	P43358	FALSE	Melanoma-associated antigen 4 OS=Homo sapiens OX=9606	MAGEA4	0.137029	4.20082	31.96	N/D	3	1	8	1	317	34.9	4.69	-3.69427	-4.06569	-3.7622	-4.22706	-4.19303	-4.34108	-4.1947	-4.16686	-4.36293
0.126983	-0.0673013	0.954422	P43378	FALSE	Tyrosine-protein phosphatase non-receptor type 9 OS=Homo sapiens OX=9606	PTPN9	0.0455783	3.67902	N/D	N/D	11	6	58	6	593	68	8.02	-2.33911	-2.53963	-3.10335	-2.89015	-2.72035	-2.31398	-2.62005	-2.41557	-2.42746
0.884276	0.0458242	1.03227	P43403	FALSE	Tyrosine-protein kinase ZAP-70 OS=Homo sapiens OX=9606	ZAP70	-0.0322727	N/D	N/D	N/D	65	38	1793	38	619	69.8	7.69	5.06558	5.04834	5.08438	5.15241	5.13219	5.11103	5.11702	5.04596	5.15503
1.38601	0.0617814	1.04375	P43487	FALSE	Ran-specific GTPase-activating protein OS=Homo sapiens OX=9606	RANBP1	-0.0437538	N/D	N/D	N/D	64	11	943	11	201	23.3	5.29	5.16899	5.14002	5.19464	5.259	5.20928	5.25955	5.17275	5.16107	5.2475
1.08034	0.0636007	1.04507	P43490	FALSE	Nicotinamide phosphoribosyltransferase OS=Homo sapiens OX=9606	NAMPT	-0.0450708	N/D	N/D	N/D	47	22	830	22	491	55.5	7.15	3.04759	2.97154	3.03704	3.07536	3.10899	3.01636	3.04333	2.965	2.95533
3.38681	0.0923874	1.06613	P43686	FALSE	26S proteasome regulatory subunit 6B OS=Homo sapiens OX=9606	PSMC4	-0.066133	N/D	N/D	N/D	50	24	1024	23	418	47.3	5.21	3.71566	3.72054	3.73921	3.84595	3.79671	3.8307	3.7624	3.74028	3.71432
0.17428	0.0146343	1.0102	P43897	TRUE	Elongation factor Ts, mitochondrial OS=Homo sapiens OX=9606	TSFM	-0.0101953	N/D	N/D	N/D	48	13	375	13	325	35.4	8.38	2.26895	2.22886	2.29073	2.19941	2.28871	2.24005	2.22581	2.16463	2.18955
2.34782	0.107404	1.07729	P45880	FALSE	Voltage-dependent anion-selective channel protein 2 OS=Homo sapiens OX=9606	VDAC2	-0.0772877	N/D	N/D	N/D	68	14	1543	14	294	31.5	7.56	5.37334	5.36658	5.3938	5.5043	5.47737	5.46622	5.33579	5.3348	5.44706
1.03575	0.138575	1.10082	P45954	FALSE	Short/branched chain specific acyl-CoA dehydrogenase, mitochondrial OS=Homo sapiens OX=9606	ACADSB	-0.100817	N/D	N/D	N/D	34	12	243	12	432	47.5	6.99	0.0630493	-0.195219	0.122496	0.111543	0.166602	0.162558	0.0509539	0.0731544	-0.0644779
0.771578	-0.0335482	0.977014	P45973	FALSE	Chromobox protein homolog 5 OS=Homo sapiens OX=9606	CBX5	0.0229856	3.37155	N/D	N/D	52	9	323	8	191	22.2	5.86	1.35907	1.34101	1.34262	1.25968	1.32303	1.32256	1.28821	1.36423	1.3167
0.668252	0.0403307	1.02835	P45974	FALSE	Ubiquitin carboxyl-terminal hydrolase 5 OS=Homo sapiens OX=9606	USP5	-0.0283495	N/D	N/D	N/D	34	28	775	28	858	95.7	5.03	2.51033	2.47905	2.44328	2.57817	2.54899	2.54425	2.56116	2.5566	2.55044
0.520487	0.203949	1.15185	P45983	TRUE	Mitogen-activated protein kinase 8 OS=Homo sapiens OX=9606	MAPK8	-0.151847	N/D	N/D	N/D	21	8	229	3	427	48.3	6.89	-1.59168	-1.93815	-2.11922	-1.80427	-1.6513	-1.92174	-2.47287	-2.00887	-1.84753
4.26166	0.317288	1.24599	P45984	FALSE	Mitogen-activated protein kinase 9 OS=Homo sapiens OX=9606	MAPK9	-0.245986	N/D	N/D	N/D	27	12	264	7	424	48.1	5.63	-1.34853	-1.43421	-1.36457	-1.09751	-1.09131	-1.13675	-1.49728	-1.43326	-1.477
1.63544	0.19601	1.14553	P45985	FALSE	Dual specificity mitogen-activated protein kinase kinase 4 OS=Homo sapiens OX=9606	MAP2K4	-0.145526	N/D	N/D	N/D	22	5	98	5	399	44.3	8.07	-1.36165	-1.39177	-1.52574	-1.08564	-1.29087	-1.18764	-1.44812	-1.2966	-1.28047
9.15212	-1.24342	0.42237	P46013	TRUE	Proliferation marker protein Ki-67 OS=Homo sapiens OX=9606	MKI67	0.57763	5.13596	2.24036	5.13596	30	72	1420	72	3256	358.5	9.45	3.06431	3.14318	3.09686	1.90723	1.87009	1.86953	3.19515	3.12268	3.13203
0.451393	-0.0948736	0.936354	P46019	FALSE	Phosphorylase b kinase regulatory subunit alpha, liver isoform OS=Homo sapiens OX=9606	PHKA2	0.0636457	3.83233	N/D	N/D	8	8	87	6	1235	138.3	6.44	-1.80867	-1.8537	-1.68476	-2.13079	-1.77598	-1.986	-2.00009	-1.95007	-1.91902
0.574437	0.646548	1.56542	P46020	FALSE	Phosphorylase b kinase regulatory subunit alpha, skeletal muscle isoform OS=Homo sapiens OX=9606	PHKA1	-0.565418	N/D	N/D	N/D	7	7	76	5	1223	137.2	6.19	-3.47696	-4.78083	-3.94015	-3.57923	-2.95367	-4.75012	-5.07032	-4.03112	-5.14596
0.254424	0.013138	1.00915	P46060	FALSE	Ran GTPase-activating protein 1 OS=Homo sapiens OX=9606	RANGAP1	-0.00914814	N/D	N/D	N/D	51	31	1266	31	587	63.5	4.68	4.22953	4.19299	4.15814	4.17624	4.22072	4.20541	4.20574	4.14059	4.19893
0.366898	0.0256982	1.01797	P46063	FALSE	ATP-dependent DNA helicase Q1 OS=Homo sapiens OX=9606	RECQL	-0.0179722	N/D	N/D	N/D	35	17	591	16	649	73.4	7.88	1.25325	1.1999	1.21522	1.19885	1.20805	1.22134	1.12025	1.13091	1.18277
1.57311	0.0626775	1.0444	P46087	FALSE	Probable 28S rRNA (cytosine(4447)-C(5))-methyltransferase OS=Homo sapiens OX=9606	NOP2	-0.0444023	N/D	N/D	N/D	39	31	1286	31	812	89.2	9.23	3.82484	3.72572	3.76833	3.82013	3.81593	3.87178	3.77801	3.76323	3.77948
0.168855	0.0503071	1.03549	P46100	TRUE	Transcriptional regulator ATRX OS=Homo sapiens OX=9606	ATRX	-0.0354853	N/D	N/D	N/D	10	20	274	20	2492	282.4	6.55	-0.138302	0.0808411	-0.0867901	0.0193796	-0.206216	-0.0675545	0.0243979	-0.347614	-0.343157
2.43506	0.115661	1.08347	P46108	FALSE	Adapter molecule crk OS=Homo sapiens OX=9606	CRK	-0.083471	N/D	N/D	N/D	38	9	174	9	304	33.8	5.55	-0.392727	-0.399773	-0.425867	-0.334319	-0.352265	-0.250671	-0.433518	-0.473297	-0.443293
3.34498	0.180794	1.13351	P46109	FALSE	Crk-like protein OS=Homo sapiens OX=9606	CRKL	-0.133507	N/D	N/D	N/D	46	11	314	11	303	33.8	6.74	1.97857	2.04346	2.07372	2.18448	2.2421	2.2734	2.09002	2.05495	2.07446
0.407859	0.258196	1.19598	P46199	FALSE	Translation initiation factor IF-2, mitochondrial OS=Homo sapiens OX=9606	MTIF2	-0.195983	N/D	N/D	N/D	6	4	30	4	727	81.3	7.15	-3.07502	-4.08587	-3.21542	-3.20543	-3.21641	-3.28656	-3.09181	-3.4192	-4.07865
1.33219	0.0490657	1.03459	P46379	TRUE	Large proline-rich protein BAG6 OS=Homo sapiens OX=9606	BAG6	-0.0345947	N/D	N/D	N/D	29	26	1001	26	1132	119.3	5.6	5.19219	5.23162	5.24829	5.32	5.27593	5.26257	5.26955	5.25961	5.22135
3.55367	0.0932419	1.06676	P46459	FALSE	Vesicle-fusing ATPase OS=Homo sapiens OX=9606	NSF	-0.0667646	N/D	N/D	N/D	49	36	1342	35	744	82.5	6.95	3.37058	3.3827	3.37987	3.48237	3.4969	3.43161	3.38857	3.37584	3.36473
0.355117	0.326712	1.25415	P46531	FALSE	Neurogenic locus notch homolog protein 1 OS=Homo sapiens OX=9606	NOTCH1	-0.254152	N/D	N/D	N/D	2	4	27	3	2555	272.3	5.12	-3.12473	-3.07316	-3.21866	-3.24508	-3.10943	-3.08233	-3.09399	-4.79087	-3.53254
0.9183	-0.216143	0.860864	P46734	FALSE	Dual specificity mitogen-activated protein kinase kinase 3 OS=Homo sapiens OX=9606	MAP2K3	0.139136	4.20851	28.968	N/D	11	4	70	2	347	39.3	7.43	-3.0701	-2.80466	-2.85249	-3.1818	-3.44823	-3.05687	-3.01094	-3.23419	-3.10455
0.025413	-0.0034976	0.997579	P46736	FALSE	Lys-63-specific deubiquitinase BRCC36 OS=Homo sapiens OX=9606	BRCC3	0.00242142	2.38512	N/D	N/D	43	11	249	11	316	36	5.92	0.90905	1.0889	1.11999	1.03417	1.04091	1.06952	1.11426	1.03518	1.04281
1.05796	0.0913281	1.06535	P46776	FALSE	60S ribosomal protein L27a OS=Homo sapiens OX=9606	RPL27A	-0.0653505	N/D	N/D	N/D	32	6	636	6	148	16.6	11	4.42409	4.597	4.47	4.65705	4.62486	4.56367	4.60177	4.50452	4.54581
0.280414	0.026607	1.01861	P46777	FALSE	60S ribosomal protein L5 OS=Homo sapiens OX=9606	RPL5	-0.0186137	N/D	N/D	N/D	46	15	1771	15	297	34.3	9.72	5.77328	5.80346	5.7801	5.73464	5.78896	5.74124	5.66962	5.68002	5.66357
1.35262	0.0660427	1.04684	P46778	TRUE	60S ribosomal protein L21 OS=Homo sapiens OX=9606	RPL21	-0.0468413	N/D	N/D	N/D	33	7	517	7	160	18.6	10.49	4.57827	4.64512	4.62768	4.66155	4.69303	4.6297	4.60735	4.58243	4.53148
0.79251	0.0295091	1.02066	P46779	FALSE	60S ribosomal protein L28 OS=Homo sapiens OX=9606	RPL28	-0.0206647	N/D	N/D	N/D	52	9	1336	9	137	15.7	12.02	4.9967	4.98563	4.99585	4.97783	4.98845	5.03281	4.94549	4.95698	4.94047
1.83876	-0.0730993	0.950594	P46781	FALSE	40S ribosomal protein S9 OS=Homo sapiens OX=9606	RPS9	0.0494063	3.71579	N/D	N/D	61	21	2163	21	194	22.6	10.65	6.3781	6.38198	6.37223	6.26185	6.27059	6.28491	6.33564	6.29854	6.30679
2.45986	-0.0934711	0.937265	P46782	FALSE	40S ribosomal protein S5 OS=Homo sapiens OX=9606	RPS5	0.062735	3.82565	N/D	N/D	49	12	955	12	204	22.9	9.72	5.2674	5.24591	5.28781	5.14272	5.18773	5.12502	5.21188	5.21303	5.24573
3.30442	-0.146155	0.903656	P46783	FALSE	40S ribosomal protein S10 OS=Homo sapiens OX=9606	RPS10	0.0963441	4.02782	N/D	N/D	65	13	892	12	165	18.9	10.15	4.50076	4.50565	4.51552	4.34694	4.37852	4.29226	4.48425	4.47059	4.43559
0.127177	0.0239822	1.01676	P46926	FALSE	Glucosamine-6-phosphate isomerase 1 OS=Homo sapiens OX=9606	GNPDA1	-0.0167621	N/D	N/D	N/D	64	13	478	10	289	32.6	6.92	1.70901	1.69076	1.74785	1.77103	1.62235	1.59057	1.46461	1.59159	1.62018
0.590553	0.0606453	1.04293	P46934	FALSE	E3 ubiquitin-protein ligase NEDD4 OS=Homo sapiens OX=9606	NEDD4	-0.0429321	N/D	N/D	N/D	14	16	254	14	1319	149	6.58	0.66621	0.609949	0.684309	0.684304	0.846589	0.723284	0.698035	0.684988	0.800991
1.26464	0.180082	1.13295	P46939	TRUE	Utrophin OS=Homo sapiens OX=9606	UTRN	-0.132949	N/D	N/D	N/D	7	20	85	20	3433	394.2	5.33	-0.51841	-0.333611	-0.431204	-0.353578	-0.417243	-0.253448	-0.59513	-0.649471	-0.601208
3.13072	0.0844057	1.06025	P46940	FALSE	Ras GTPase-activating-like protein IQGAP1 OS=Homo sapiens OX=9606	IQGAP1	-0.0602509	N/D	N/D	N/D	36	60	2301	57	1657	189.1	6.48	4.66692	4.66203	4.65859	4.77295	4.73095	4.71817	4.64612	4.62812	4.67591
5.66032	2.19495	4.57874	P46976	FALSE	Glycogenin-1 OS=Homo sapiens OX=9606	GYG1	-3.57874	N/D	N/D	N/D	16	4	76	4	350	39.4	5.53	-3.23937	-3.63116	-3.18442	-0.962642	-0.934545	-1.15833	-2.98063	-3.30279	-2.94236
0.0318238	-0.00182899	0.998733	P46977	FALSE	Dolichyl-diphosphooligosaccharide--protein glycosyltransferase subunit STT3A OS=Homo sapiens OX=9606	STT3A	0.00126695	2.10331	N/D	N/D	14	12	574	11	705	80.5	8.07	2.14065	2.19169	2.18891	2.16522	2.20016	2.13394	2.17995	2.13097	2.17745
0.146284	0.0100144	1.00697	P47224	FALSE	Guanine nucleotide exchange factor MSS4 OS=Homo sapiens OX=9606	RABIF	-0.00696558	N/D	N/D	N/D	29	3	141	3	123	13.8	5.52	1.17187	1.22128	1.16168	1.19768	1.15262	1.15946	1.17695	1.11167	1.11599
2.251	-0.142802	0.905758	P47736	FALSE	Rap1 GTPase-activating protein 1 OS=Homo sapiens OX=9606	RAP1GAP	0.094242	4.01723	N/D	N/D	14	9	137	8	663	73.3	5.82	-1.63276	-1.54226	-1.68936	-1.7644	-1.78022	-1.76357	-1.66573	-1.66632	-1.56316
0.214027	0.047222	1.03327	P47755	FALSE	F-actin-capping protein subunit alpha-2 OS=Homo sapiens OX=9606	CAPZA2	-0.0332734	N/D	N/D	N/D	63	12	637	10	286	32.9	5.85	2.08643	1.83241	1.73007	1.78578	1.9303	2.01454	1.93524	1.81774	1.77602
0.469356	-0.0229929	0.984189	P47756	FALSE	F-actin-capping protein subunit beta OS=Homo sapiens OX=9606	CAPZB	0.0158112	3.20589	N/D	N/D	48	14	1667	14	277	31.3	5.59	4.66946	4.70157	4.68976	4.62272	4.64174	4.70202	4.66505	4.63634	4.70873
1.07897	0.132432	1.09614	P47813	FALSE	Eukaryotic translation initiation factor 1A, X-chromosomal OS=Homo sapiens OX=9606	EIF1AX	-0.0961398	N/D	N/D	N/D	39	7	276	1	144	16.5	5.24	0.476231	0.384626	0.674362	0.739495	0.626067	0.611784	0.495118	0.532866	0.596899
2.09998	0.118051	1.08527	P47897	FALSE	Glutamine--tRNA ligase OS=Homo sapiens OX=9606	QARS1	-0.0852678	N/D	N/D	N/D	49	40	1877	39	775	87.7	7.15	4.81639	4.78606	4.83322	4.94536	4.92908	4.84496	4.81745	4.73249	4.74487
0.754239	0.0794479	1.05661	P47914	FALSE	60S ribosomal protein L29 OS=Homo sapiens OX=9606	RPL29	-0.0566136	N/D	N/D	N/D	16	3	258	3	159	17.7	11.66	3.11848	3.1898	3.0892	3.29533	3.24628	3.24113	3.30933	3.12712	3.25485
0.472283	-0.0566443	0.961498	P47974	FALSE	mRNA decay activator protein ZFP36L2 OS=Homo sapiens OX=9606	ZFP36L2	0.038502	3.60254	N/D	N/D	16	6	119	6	494	51	8.16	-1.30883	-1.35241	-1.53014	-1.46921	-1.35634	-1.45089	-1.33807	-1.30529	-1.37827
1.94868	0.084798	1.06054	P47985	FALSE	Cytochrome b-c1 complex subunit Rieske, mitochondrial OS=Homo sapiens OX=9606	UQCRFS1	-0.0605393	N/D	N/D	N/D	28	10	648	2	274	29.6	8.32	0.937231	0.962296	0.864529	1.05207	0.992867	1.0171	0.941209	0.942295	0.96773
3.0431	0.115995	1.08372	P48047	FALSE	ATP synthase subunit O, mitochondrial OS=Homo sapiens OX=9606	ATP5PO	-0.0837219	N/D	N/D	N/D	68	12	752	12	213	23.3	9.96	3.92121	3.92337	3.87401	4.04462	4.04414	4.05254	3.9793	3.93777	3.95098
0.426724	0.0852974	1.06091	P48059	FALSE	LIM and senescent cell antigen-like-containing domain protein 1 OS=Homo sapiens OX=9606	LIMS1	-0.0609064	N/D	N/D	N/D	36	10	259	10	325	37.2	8.05	-0.0431309	0.278139	0.309286	0.30848	0.325788	0.218664	0.231118	0.328184	0.0904827
0.00383383	-0.00148026	0.998974	P48147	FALSE	Prolyl endopeptidase OS=Homo sapiens OX=9606	PREP	0.00102551	2.01139	N/D	N/D	37	26	767	26	710	80.6	5.86	2.64713	3.04088	3.03987	2.7803	3.0975	2.73617	2.76285	3.01189	2.7342
0.00794099	0.00160074	1.00111	P48200	TRUE	Iron-responsive element-binding protein 2 OS=Homo sapiens OX=9606	IREB2	-0.00111017	N/D	N/D	N/D	14	11	201	11	963	105	7.05	-0.437622	-0.444134	-0.268976	-0.373382	-0.356933	-0.305748	-0.160542	-0.405964	-0.364491
0.19795	0.0213323	1.0149	P48380	TRUE	Transcription factor RFX3 OS=Homo sapiens OX=9606	RFX3	-0.0148963	N/D	N/D	N/D	11	5	56	3	749	83.5	6	-1.04858	-1.07157	-1.07775	-1.15578	-1.01358	-1.06994	-1.06523	-1.16827	-1.1752
3.22663	-0.107718	0.928055	P48382	TRUE	DNA-binding protein RFX5 OS=Homo sapiens OX=9606	RFX5	0.0719453	3.88943	N/D	N/D	29	16	147	15	616	65.3	9.29	1.42905	1.42682	1.48565	1.31799	1.3056	1.35538	1.41861	1.4266	1.41752
1.04125	-0.144515	0.904684	P48426	FALSE	Phosphatidylinositol 5-phosphate 4-kinase type-2 alpha OS=Homo sapiens OX=9606	PIP4K2A	0.0953163	4.02267	N/D	N/D	33	13	428	8	406	46.2	6.99	0.714701	0.763342	0.703493	0.475078	0.560428	0.818256	0.756406	0.830498	0.806171
0.297864	0.0374452	1.02629	P48444	TRUE	Coatomer subunit delta OS=Homo sapiens OX=9606	ARCN1	-0.0262948	N/D	N/D	N/D	42	24	1107	24	511	57.2	6.21	3.91721	3.93754	3.92309	3.93702	3.8268	3.90684	3.79681	3.78176	3.76024
0.347943	0.0411992	1.02897	P48449	FALSE	Lanosterol synthase OS=Homo sapiens OX=9606	LSS	-0.0289688	N/D	N/D	N/D	44	31	1007	31	732	83.3	6.61	3.15127	3.05517	3.08731	3.15662	3.04749	3.17169	3.15496	2.95358	3.10209
0.242256	0.0491118	1.03463	P48454	FALSE	Serine/threonine-protein phosphatase 2B catalytic subunit gamma isoform OS=Homo sapiens OX=9606	PPP3CC	-0.0346278	N/D	N/D	N/D	4	2	26	2	512	58.1	6.98	-3.76628	-3.72171	-3.8136	-3.62745	-3.68454	-3.54947	-3.48709	-3.70096	-3.52797
0.12793	0.0255017	1.01783	P48506	TRUE	Glutamate--cysteine ligase catalytic subunit OS=Homo sapiens OX=9606	GCLC	-0.0178336	N/D	N/D	N/D	30	17	429	16	637	72.7	6.09	1.26098	1.24366	1.27695	1.37445	1.3204	1.35156	1.28351	1.57515	1.29957
0.0656021	0.00919199	1.00639	P48507	FALSE	Glutamate--cysteine ligase regulatory subunit OS=Homo sapiens OX=9606	GCLM	-0.00639174	N/D	N/D	N/D	27	8	198	8	274	30.7	6.02	0.160166	0.0639648	0.141493	0.112746	0.167207	0.0145264	-0.0307913	0.0886173	0.110357
0.0954647	0.0754671	1.0537	P48551	FALSE	Interferon alpha/beta receptor 2 OS=Homo sapiens OX=9606	IFNAR2	-0.0537021	N/D	N/D	N/D	2	1	1	1	515	57.7	4.5	-5.02141	-4.32301	-5.68071	-5.18398	-4.84849	-5.0991	-5.46095	-5.26821	-4.96165
0.267603	0.171546	1.12626	P48553	FALSE	Trafficking protein particle complex subunit 10 OS=Homo sapiens OX=9606	TRAPPC10	-0.126265	N/D	N/D	N/D	9	10	52	10	1259	142.1	6.04	-1.78312	-1.93124	-2.85048	-2.02634	-2.23125	-1.72079	-2.49391	-1.93776	-1.98954
3.02268	0.0784634	1.05589	P48556	TRUE	26S proteasome non-ATPase regulatory subunit 8 OS=Homo sapiens OX=9606	PSMD8	-0.0558928	N/D	N/D	N/D	33	12	468	12	350	39.6	9.7	2.83548	2.86858	2.82959	2.91041	2.94718	2.94809	2.88026	2.86257	2.8641
9.2024	-2.62916	0.161638	P48634	TRUE	Protein PRRC2A OS=Homo sapiens OX=9606	PRRC2A	0.838362	5.71489	1.7083	5.71489	23	32	332	30	2157	228.7	9.45	1.14253	0.99733	1.14204	-1.4802	-1.63545	-1.46253	1.14558	1.01794	1.17318
0.437069	0.0386748	1.02717	P48637	FALSE	Glutathione synthetase OS=Homo sapiens OX=9606	GSS	-0.0271699	N/D	N/D	N/D	32	16	462	16	474	52.4	5.92	2.87521	2.99187	2.99912	2.98169	2.90389	2.99297	2.90598	2.86533	2.88755
0.0134875	0.000542164	1.00038	P48643	TRUE	T-complex protein 1 subunit epsilon OS=Homo sapiens OX=9606	CCT5	-0.00037587	N/D	N/D	N/D	74	39	4557	38	541	59.6	5.66	6.78257	6.75924	6.75982	6.78636	6.73891	6.75983	6.77515	6.73284	6.75734
0.000952015	-0.000271002	0.999812	P48651	FALSE	Phosphatidylserine synthase 1 OS=Homo sapiens OX=9606	PTDSS1	0.000187827	1.27384	N/D	N/D	9	3	50	3	473	55.5	8.43	-2.07849	-2.14309	-2.07081	-2.066	-2.11934	-2.17925	-2.08759	-2.40747	-1.94011
6.74566	0.920742	1.89309	P48723	FALSE	Heat shock 70 kDa protein 13 OS=Homo sapiens OX=9606	HSPA13	-0.893088	N/D	N/D	N/D	15	6	148	6	471	51.9	5.76	-0.624308	-0.677521	-0.77947	0.251042	0.231439	0.284084	-0.624753	-0.713343	-0.571924
0.307939	0.0927405	1.06639	P48729	FALSE	Casein kinase I isoform alpha OS=Homo sapiens OX=9606	CSNK1A1	-0.066394	N/D	N/D	N/D	37	12	374	12	337	38.9	9.57	0.829117	0.651499	0.817886	1.04137	0.608922	0.594967	0.533799	0.490961	0.610804
1.23503	-0.450854	0.731609	P48730	FALSE	Casein kinase I isoform delta OS=Homo sapiens OX=9606	CSNK1D	0.268391	4.56449	4.99202	N/D	34	13	257	4	415	47.3	9.74	-1.49605	-1.39146	-1.89422	-2.50433	-1.80819	-1.86165	-1.62166	-1.38069	-1.85915
3.05015	0.169059	1.12432	P48735	FALSE	Isocitrate dehydrogenase [NADP], mitochondrial OS=Homo sapiens OX=9606	IDH2	-0.124325	N/D	N/D	N/D	52	24	1894	23	452	50.9	8.69	5.17808	5.13757	5.16367	5.38652	5.38323	5.347	5.25129	5.24348	5.24504
0.504901	-0.14212	0.906186	P48736	FALSE	Phosphatidylinositol 4,5-bisphosphate 3-kinase catalytic subunit gamma isoform OS=Homo sapiens OX=9606	PIK3CG	0.0938136	4.01505	N/D	N/D	6	6	37	6	1102	126.4	7.5	-2.6663	-2.5852	-2.78881	-3.02013	-3.02618	-2.97622	-3.12515	-3.04601	-2.98088
0.612744	0.130091	1.09436	P48739	TRUE	Phosphatidylinositol transfer protein beta isoform OS=Homo sapiens OX=9606	PITPNB	-0.0943624	N/D	N/D	N/D	61	18	657	13	271	31.5	6.87	2.70142	3.01254	2.72608	2.77561	2.77202	3.02998	2.63986	2.63743	2.65736
0.0980764	-0.0296114	0.979684	P48960	FALSE	Adhesion G protein-coupled receptor E5 OS=Homo sapiens OX=9606	ADGRE5	0.0203159	3.31675	N/D	N/D	4	3	22	3	835	91.8	6.87	-2.82574	-2.81182	-3.06589	-3.01951	-3.07987	-2.98684	-3.18033	-3.22892	-2.88206
1.50274	0.0840287	1.05997	P49005	FALSE	DNA polymerase delta subunit 2 OS=Homo sapiens OX=9606	POLD2	-0.0599739	N/D	N/D	N/D	36	15	433	15	469	51.3	5.58	1.13276	1.2317	1.15886	1.27813	1.31017	1.27621	1.26277	1.19483	1.24389
0.474267	-0.0178943	0.987673	P49006	FALSE	MARCKS-related protein OS=Homo sapiens OX=9606	MARCKSL1	0.0123268	3.09624	N/D	N/D	82	9	489	9	195	19.5	4.67	3.62081	3.60707	3.54834	3.59573	3.55443	3.58907	3.59808	3.60255	3.60897
1.36002	-0.291463	0.817073	P49069	FALSE	Guided entry of tail-anchored proteins factor CAMLG OS=Homo sapiens OX=9606	CAMLG	0.182927	4.35002	10.2716	N/D	32	6	71	6	296	32.9	8.05	-1.14877	-0.713709	-0.90406	-1.13061	-1.06151	-1.43896	-0.803016	-0.940289	-1.00354
0.35948	0.146621	1.10697	P49116	FALSE	Nuclear receptor subfamily 2 group C member 2 OS=Homo sapiens OX=9606	NR2C2	-0.106974	N/D	N/D	N/D	21	8	58	8	596	65.4	6.28	-2.33296	-1.7314	-2.15007	-2.05066	-2.173	-2.11364	-2.38534	-2.59704	-2.35751
4.64048	-0.23493	0.849726	P49137	FALSE	MAP kinase-activated protein kinase 2 OS=Homo sapiens OX=9606	MAPKAPK2	0.150274	4.2476	19.5051	N/D	30	13	250	9	400	45.5	8.68	-0.287088	-0.289846	-0.324162	-0.460015	-0.552373	-0.547182	-0.265674	-0.281303	-0.26149
3.7448	0.176702	1.1303	P49189	FALSE	4-trimethylaminobutyraldehyde dehydrogenase OS=Homo sapiens OX=9606	ALDH9A1	-0.130297	N/D	N/D	N/D	39	15	618	15	494	53.8	5.87	2.65664	2.5981	2.64583	2.77688	2.76461	2.83109	2.57551	2.57974	2.62913
0.583263	0.0521922	1.03684	P49207	FALSE	60S ribosomal protein L34 OS=Homo sapiens OX=9606	RPL34	-0.0368392	N/D	N/D	N/D	37	6	875	6	117	13.3	11.47	4.39161	4.51832	4.55477	4.56734	4.58556	4.47137	4.49345	4.52923	4.448
3.42561	0.140679	1.10242	P49247	FALSE	Ribose-5-phosphate isomerase OS=Homo sapiens OX=9606	RPIA	-0.102424	N/D	N/D	N/D	50	13	402	13	311	33.2	8.54	2.85678	2.86587	2.83068	3.00537	2.93582	3.00147	2.86374	2.79478	2.82938
1.31863	0.0684861	1.04862	P49257	TRUE	Protein ERGIC-53 OS=Homo sapiens OX=9606	LMAN1	-0.0486157	N/D	N/D	N/D	44	18	494	18	510	57.5	6.77	2.74703	2.70865	2.75094	2.88176	2.78531	2.80052	2.79945	2.78963	2.72856
0.160299	0.0337345	1.02366	P49281	FALSE	Natural resistance-associated macrophage protein 2 OS=Homo sapiens OX=9606	SLC11A2	-0.0236585	N/D	N/D	N/D	5	2	33	2	568	62.2	6.09	-3.47746	-3.59651	-3.55556	-3.55255	-3.47211	-3.68674	-3.5054	-3.71759	-3.7727
1.05049	-0.0373295	0.974457	P49321	FALSE	Nuclear autoantigenic sperm protein OS=Homo sapiens OX=9606	NASP	0.025543	3.41851	N/D	N/D	61	37	2391	37	788	85.2	4.3	5.74535	5.73411	5.72957	5.68369	5.69606	5.66399	5.67278	5.68952	5.74014
3.55164	0.0979978	1.07029	P49327	FALSE	Fatty acid synthase OS=Homo sapiens OX=9606	FASN	-0.0702871	N/D	N/D	N/D	48	88	4026	88	2511	273.3	6.44	5.67904	5.68005	5.68712	5.77472	5.77661	5.7472	5.68334	5.63902	5.64048
1.79956	-0.297092	0.813891	P49336	FALSE	Cyclin-dependent kinase 8 OS=Homo sapiens OX=9606	CDK8	0.186109	4.3592	9.8403	N/D	15	7	67	4	464	53.3	8.57	-2.77595	-2.92059	-2.7609	-3.22421	-3.22994	-3.12977	-3.18024	-2.90672	-2.84089
0.620268	0.0664471	1.04713	P49354	FALSE	Protein farnesyltransferase/geranylgeranyltransferase type-1 subunit alpha OS=Homo sapiens OX=9606	FNTA	-0.0471347	N/D	N/D	N/D	32	11	282	11	379	44.4	5.08	0.336111	0.224148	0.221983	0.250539	0.314172	0.2852	0.189771	0.25091	0.0782166
2.19887	0.249991	1.1892	P49356	FALSE	Protein farnesyltransferase subunit beta OS=Homo sapiens OX=9606	FNTB	-0.1892	N/D	N/D	N/D	6	3	48	3	437	48.7	5.82	-1.10952	-1.0485	-0.967665	-0.665622	-0.715926	-0.857515	-1.02992	-0.972012	-0.850458
2.73727	0.0972044	1.0697	P49366	FALSE	Deoxyhypusine synthase OS=Homo sapiens OX=9606	DHPS	-0.0696986	N/D	N/D	N/D	41	11	538	11	369	40.9	5.36	2.24413	2.21235	2.24061	2.37724	2.32876	2.30311	2.22008	2.23801	2.27979
4.30997	0.112447	1.08106	P49368	FALSE	T-complex protein 1 subunit gamma OS=Homo sapiens OX=9606	CCT3	-0.0810605	N/D	N/D	N/D	71	43	3587	43	545	60.5	6.49	6.67642	6.67104	6.66123	6.80077	6.79109	6.78986	6.69921	6.66604	6.71482
0.873799	0.224444	1.16833	P49406	TRUE	39S ribosomal protein L19, mitochondrial OS=Homo sapiens OX=9606	MRPL19	-0.168327	N/D	N/D	N/D	29	8	176	8	292	33.5	9.5	-0.276115	0.181416	0.261713	0.347985	0.421962	0.388992	0.239205	0.231518	0.333479
2.5538	0.0741382	1.05273	P49411	FALSE	Elongation factor Tu, mitochondrial OS=Homo sapiens OX=9606	TUFM	-0.052732	N/D	N/D	N/D	56	21	1245	21	452	49.5	7.61	4.55083	4.57875	4.53244	4.62945	4.62885	4.60126	4.53605	4.50831	4.56792
4.0786	-0.227774	0.853951	P49418	TRUE	Amphiphysin OS=Homo sapiens OX=9606	AMPH	0.146049	4.23306	22.2318	N/D	11	6	446	5	695	76.2	4.64	1.4285	1.46089	1.39875	1.16885	1.26742	1.18902	1.39781	1.45263	1.47865
0.426408	-0.0265505	0.981765	P49427	FALSE	Ubiquitin-conjugating enzyme E2 R1 OS=Homo sapiens OX=9606	CDC34	0.0182351	3.2689	N/D	N/D	20	5	158	4	236	26.7	4.54	-0.622643	-0.698372	-0.667961	-0.673738	-0.657075	-0.639908	-0.586715	-0.581676	-0.624771
0.237405	0.0546788	1.03863	P49450	TRUE	Histone H3-like centromeric protein A OS=Homo sapiens OX=9606	CENPA	-0.0386278	N/D	N/D	N/D	10	1	21	1	140	16	11.71	-4.70073	-4.58456	-4.68852	-4.72225	-4.54872	-4.46342	-4.58113	-4.81568	-4.42625
5.41051	-0.364654	0.776655	P49454	TRUE	Centromere protein F OS=Homo sapiens OX=9606	CENPF	0.223345	4.45875	6.71553	N/D	34	94	992	94	3114	357.3	5.1	3.34079	3.24849	3.28473	2.95106	2.92757	2.86356	3.24686	3.25091	3.30052
3.22167	0.105718	1.07603	P49458	FALSE	Signal recognition particle 9 kDa protein OS=Homo sapiens OX=9606	SRP9	-0.0760296	N/D	N/D	N/D	64	6	373	6	86	10.1	7.97	3.41476	3.41391	3.39107	3.46591	3.54807	3.52536	3.39563	3.40235	3.42664
0.0590619	-0.00906102	0.993739	P49459	FALSE	Ubiquitin-conjugating enzyme E2 A OS=Homo sapiens OX=9606	UBE2A	0.00626094	2.79937	N/D	N/D	18	3	125	3	152	17.3	5.15	-0.715565	-0.648241	-0.638758	-0.639972	-0.745996	-0.799082	-0.746823	-0.846884	-0.719461
1.43551	-0.329223	0.795965	P49585	FALSE	Choline-phosphate cytidylyltransferase A OS=Homo sapiens OX=9606	PCYT1A	0.204035	4.40881	8.00139	N/D	30	9	151	9	367	41.7	7.25	-0.19039	-0.150606	-0.250376	-0.952004	-0.422858	-0.393023	-0.34291	-0.285906	-0.340246
2.45615	0.0541342	1.03824	P49588	FALSE	Alanine--tRNA ligase, cytoplasmic OS=Homo sapiens OX=9606	AARS1	-0.0382359	N/D	N/D	N/D	42	36	1955	36	968	106.7	5.53	4.76589	4.79551	4.80502	4.82125	4.86142	4.84813	4.78036	4.78111	4.80891
1.39323	0.0671592	1.04765	P49589	FALSE	Cysteine--tRNA ligase, cytoplasmic OS=Homo sapiens OX=9606	CARS1	-0.0476517	N/D	N/D	N/D	43	28	815	28	748	85.4	6.76	2.59223	2.59192	2.66101	2.7073	2.71977	2.69501	2.66353	2.70337	2.62916
1.56932	0.125322	1.09075	P49590	FALSE	Histidine--tRNA ligase, mitochondrial OS=Homo sapiens OX=9606	HARS2	-0.0907511	N/D	N/D	N/D	28	14	756	7	506	56.9	8.24	1.14012	1.02598	1.18465	1.29301	1.20175	1.16563	1.1172	1.06372	1.03717
1.32057	0.111579	1.08041	P49591	FALSE	Serine--tRNA ligase, cytoplasmic OS=Homo sapiens OX=9606	SARS1	-0.0804104	N/D	N/D	N/D	40	22	846	22	514	58.7	6.43	4.36868	4.19892	4.26552	4.45928	4.40073	4.31061	4.33322	4.24256	4.26287
0.0683775	-0.0314457	0.978439	P49593	TRUE	Protein phosphatase 1F OS=Homo sapiens OX=9606	PPM1F	0.0215606	3.34313	N/D	N/D	24	11	213	11	454	49.8	5.1	0.594049	0.723495	0.149517	0.361897	0.719005	0.293716	0.614381	0.23752	0.618948
1.26592	-0.160349	0.894809	P49641	FALSE	Alpha-mannosidase 2x OS=Homo sapiens OX=9606	MAN2A2	0.105191	4.07025	N/D	N/D	1	2	30	1	1150	130.5	6.84	-0.867281	-0.831335	-0.985592	-1.05446	-1.22995	-1.10612	-1.01626	-1.01978	-1.09871
1.45064	0.0961846	1.06894	P49642	FALSE	DNA primase small subunit OS=Homo sapiens OX=9606	PRIM1	-0.0689427	N/D	N/D	N/D	39	16	304	16	420	49.9	8.21	0.405987	0.339745	0.376118	0.53485	0.508101	0.448706	0.358108	0.437456	0.488794
1.97494	0.116024	1.08374	P49643	TRUE	DNA primase large subunit OS=Homo sapiens OX=9606	PRIM2	-0.0837439	N/D	N/D	N/D	41	18	470	18	509	58.8	7.91	1.10772	1.13282	1.17232	1.31135	1.32781	1.22153	1.21896	1.18828	1.20514
1.4837	-0.187764	0.877966	P49674	TRUE	Casein kinase I isoform epsilon OS=Homo sapiens OX=9606	CSNK1E	0.122034	4.143	130.105	N/D	27	12	248	3	416	47.3	9.66	-2.45707	-2.37745	-2.50733	-2.68581	-2.57574	-2.83942	-2.59659	-2.5828	-2.55412
0.752891	0.0567644	1.04013	P49711	TRUE	Transcriptional repressor CTCF OS=Homo sapiens OX=9606	CTCF	-0.0401304	N/D	N/D	N/D	35	22	569	22	727	82.7	6.96	1.53065	1.44806	1.56517	1.6427	1.55842	1.61245	1.54019	1.598	1.60448
1.90984	0.092375	1.06612	P49720	FALSE	Proteasome subunit beta type-3 OS=Homo sapiens OX=9606	PSMB3	-0.0661238	N/D	N/D	N/D	44	10	847	10	205	22.9	6.55	3.90973	3.82746	3.83541	3.92383	3.9588	3.9109	3.85871	3.77868	3.82281
2.06443	0.0526436	1.03716	P49721	FALSE	Proteasome subunit beta type-2 OS=Homo sapiens OX=9606	PSMB2	-0.0371637	N/D	N/D	N/D	63	14	808	14	201	22.8	7.02	4.57695	4.52849	4.56711	4.62317	4.5763	4.61403	4.53854	4.54137	4.55869
4.32399	0.0616879	1.04369	P49736	FALSE	DNA replication licensing factor MCM2 OS=Homo sapiens OX=9606	MCM2	-0.0436862	N/D	N/D	N/D	52	41	2071	41	904	101.8	5.52	5.33518	5.31337	5.31968	5.37775	5.39345	5.39826	5.32967	5.33478	5.33612
1.11632	0.106878	1.0769	P49748	FALSE	Very long-chain specific acyl-CoA dehydrogenase, mitochondrial OS=Homo sapiens OX=9606	ACADVL	-0.0768954	N/D	N/D	N/D	41	23	656	23	655	70.3	8.75	2.06856	2.01779	2.04463	2.27784	2.05531	2.20993	2.14313	2.05381	2.11698
3.88438	-0.2339	0.850333	P49750	TRUE	YLP motif-containing protein 1 OS=Homo sapiens OX=9606	YLPM1	0.149667	4.24554	19.8528	N/D	29	50	922	50	2146	241.5	6.55	2.58827	2.67193	2.72386	2.4641	2.44059	2.45046	2.71393	2.69779	2.71793
0.663774	-0.0734452	0.950366	P49754	FALSE	Vacuolar protein sorting-associated protein 41 homolog OS=Homo sapiens OX=9606	VPS41	0.0496342	3.71789	N/D	N/D	14	11	88	11	854	98.5	5.85	-0.633171	-0.528709	-0.7714	-0.718574	-0.778665	-0.761871	-0.678603	-0.738453	-0.727211
0.66058	0.0428306	1.03013	P49755	FALSE	Transmembrane emp24 domain-containing protein 10 OS=Homo sapiens OX=9606	TMED10	-0.030133	N/D	N/D	N/D	31	6	410	6	219	25	7.44	2.67066	2.61002	2.58417	2.68571	2.616	2.67691	2.64287	2.54318	2.64936
[truncated: 4,652 more rows]

## Sheet: OBSC1_nHU_Exploris
-LOG(P-Value)	Difference log2	Ratio OBSC1/MBP	Accession	Contains putative PxxP?	Description	Gene Name	BI	pKd	threshold	pKdsign	Coverage [%]	# Peptides	# PSMs	# Unique Peptides	# AAs	MW [kDa]	calc. pI	XIC OBSC1 rep1	XIC OBSC1 rep2	XIC OBSC1 rep3	XIC MBP_a rep1	XIC MBP_a rep2	XIC MBP_a rep3	XIC MBP_b rep1	XIC MBP_b rep2	XIC MBP_b rep3	XIC AMPH rep1	XIC AMPH rep2	XIC AMPH rep3
[truncated: 6,357 more rows]

[truncated: 5 more sheets: ARHGEF7_nHU_Exploris, PRMT2_nHU_Exploris, ABL1_nHU_Exploris, AMPH_nHU_Exploris, BIN1_nHU_Elite]
