# Supplementary material for: Uncovering the BIN1-SH3 interactome underpinning centronuclear myopathy
Source: eLife. 2024 Jul 12;13:RP95397. doi: 10.7554/eLife.95397 (PMC11245310; doi:10.7554/eLife.95397)
Supplement: Supplementary file 2. — Significant partners have non “0” values in the “pKd” column. [file elife-95397-supp2.xlsx]

## Sheet: SH32
FRAGMENT1_geneID	FRAGMENT1_UNIPROT	FRAGMENT1_fragment	FRAGMENT1_site	FRAGMENT1_mod	FRAGMENT1_construct	FRAGMENT2_geneID	FRAGMENT2_UNIPROT	FRAGMENT2_fragment	FRAGMENT2_site	FRAGMENT2_mod	FRAGMENT2_sequence	FRAGMENT2_construct	Holdup_BI_average	Holdup_BI_stdev	Holdup_immob	n (no. of measurement)	pKd	TYPE	fitting	Date
BIN1	O00499	513-593	SH3	D537V	his6-MBP-TEVsite-SH3	DNM2	P50570	823-860	\N	\N	\N	Biotinylated peptide with ttds linker	0.00247063	0.0270398	3	18	0	HU (DAPF)	Bait concentration was adjusted to fit the profile to WT	2022.10.24.
BIN1	O00499	513-593	SH3	F584S	his6-MBP-TEVsite-SH3	DNM2	P50570	823-860	\N	\N	\N	Biotinylated peptide with ttds linker	-0.0417614	0.0464228	3	18	0	HU (DAPF)	Bait concentration was adjusted to fit the profile to WT	2022.10.24.
BIN1	O00499	513-593	SH3	P551L	his6-MBP-TEVsite-SH3	DNM2	P50570	823-860	\N	\N	\N	Biotinylated peptide with ttds linker	0.182755	0.0258626	3	6	4.6072	HU (DAPF)	Bait concentration was adjusted to fit the profile to WT	2022.10.24.
BIN1	O00499	513-593	SH3	Q540H	his6-MBP-TEVsite-SH3	DNM2	P50570	823-860	\N	\N	\N	Biotinylated peptide with ttds linker	0.411161	0.0220357	3	18	4.62601	HU (DAPF)	Bait concentration was adjusted to fit the profile to WT	2022.10.24.
BIN1	O00499	513-593	SH3	R581C	his6-MBP-TEVsite-SH3	DNM2	P50570	823-860	\N	\N	\N	Biotinylated peptide with ttds linker	0.186295	0.0250673	3	6	4.61814	HU (DAPF)	Bait concentration was adjusted to fit the profile to WT	2022.10.24.
BIN1	O00499	513-593	SH3	T532M	his6-MBP-TEVsite-SH3	DNM2	P50570	823-860	\N	\N	\N	Biotinylated peptide with ttds linker	0.336923	0.0155651	3	18	4.48449	HU (DAPF)	Bait concentration was adjusted to fit the profile to WT	2022.10.24.
BIN1	O00499	513-593	SH3	V566M	his6-MBP-TEVsite-SH3	DNM2	P50570	823-860	\N	\N	\N	Biotinylated peptide with ttds linker	0.348956	0.0204423	3	18	4.50894	HU (DAPF)	Bait concentration was adjusted to fit the profile to WT	2022.10.24.
BIN1	O00499	513-593	SH3	V583I	his6-MBP-TEVsite-SH3	DNM2	P50570	823-860	\N	\N	\N	Biotinylated peptide with ttds linker	0.271051	0.0145487	3	9	4.67186	HU (DAPF)	Bait concentration was adjusted to fit the profile to WT	2022.10.24.
BIN1	O00499	513-593	SH3	\N	his6-MBP-TEVsite-SH3	DNM2	P50570	823-860	\N	\N	\N	Biotinylated peptide with ttds linker	0.370656	0.0148189	3	18	4.55214	HU (DAPF)	Bait concentration was adjusted to fit the profile to WT	2022.10.24.
BIN1	O00499	513-593	SH3	Y531S	his6-MBP-TEVsite-SH3	DNM2	P50570	823-860	\N	\N	\N	Biotinylated peptide with ttds linker	0.0341048	0.0222285	3	18	0	HU (DAPF)	Bait concentration was adjusted to fit the profile to WT	2022.10.24.
BIN1	O00499	513-593	SH3	P551L	his6-MBP-TEVsite-SH3	ACAP1	Q15027	534-548	PxxP_1	\N	GRPRGQPPVPPKPSI	bio ado ado-GRPRGQPPVPPKPSI	0.0134408	0.0228259	6	4	0	HU (DAPF)	Bait concentration was adjusted to fit the profile to WT	2022.10.24.
BIN1	O00499	513-593	SH3	P551L	his6-MBP-TEVsite-SH3	ACAP1	Q15027	553-567	PxxP_2	\N	GSLRSKPEPPSEDLG	bio ado ado-GSLRSKPEPPSEDLG	-0.0109593	0.0405006	6	2	0	HU (DAPF)	Bait concentration was adjusted to fit the profile to WT	2022.10.24.
BIN1	O00499	513-593	SH3	P551L	his6-MBP-TEVsite-SH3	ARHGAP17	Q68EM7	632-646	PxxP_1	\N	AVKKPAPAPPKPGNP	bio ado ado-AVKKPAPAPPKPGNP	-0.0018382	0.026784	6	2	0	HU (DAPF)	Bait concentration was adjusted to fit the profile to WT	2022.10.24.
BIN1	O00499	513-593	SH3	P551L	his6-MBP-TEVsite-SH3	ARHGAP17	Q68EM7	662-676	PxxP_2	\N	HPPSLSPKPPTRSPS	bio ado ado-HPPSLSPKPPTRSPS	0.0428841	0.0175378	6	2	0	HU (DAPF)	Bait concentration was adjusted to fit the profile to WT	2022.10.24.
BIN1	O00499	513-593	SH3	P551L	his6-MBP-TEVsite-SH3	ARHGAP17	Q68EM7	765-779	PxxP_3	\N	PLGKQNPSLPAPQTL	bio ado ado-PLGKQNPSLPAPQTL	0.00404677	0.0102211	6	2	0	HU (DAPF)	Bait concentration was adjusted to fit the profile to WT	2022.10.24.
BIN1	O00499	513-593	SH3	P551L	his6-MBP-TEVsite-SH3	ARHGAP17	Q68EM7	801-815	PxxP_4	\N	PKPRNRPSVPPPPQP	bio ado ado-PKPRNRPSVPPPPQP	0.0142681	0.00383173	6	2	0	HU (DAPF)	Bait concentration was adjusted to fit the profile to WT	2022.10.24.
BIN1	O00499	513-593	SH3	P551L	his6-MBP-TEVsite-SH3	ARHGAP45	Q92619	1106-1120	PxxP_1	\N	NNVLQAPLPPMRLRG	bio ado ado-NNVLQAPLPPMRLRG	0.227802	0.0116393	6	2	4.73682	HU (DAPF)	Bait concentration was adjusted to fit the profile to WT	2022.10.24.
BIN1	O00499	513-593	SH3	P551L	his6-MBP-TEVsite-SH3	ARHGAP45	Q92619	681-695	PxxP_2	\N	ELPVAVPSGPFRHEG	bio ado ado-ELPVAVPSGPFRHEG	-0.00609939	0.00901807	6	2	0	HU (DAPF)	Bait concentration was adjusted to fit the profile to WT	2022.10.24.
BIN1	O00499	513-593	SH3	P551L	his6-MBP-TEVsite-SH3	BUD13	Q9BRD0	194-208	PxxP_1	\N	RHDSPDPSPPRRPQH	bio ado ado-RHDSPDPSPPRRPQH	-0.0403221	0.0377184	6	2	0	HU (DAPF)	Bait concentration was adjusted to fit the profile to WT	2022.10.24.
BIN1	O00499	513-593	SH3	P551L	his6-MBP-TEVsite-SH3	BUD13	Q9BRD0	219-233	PxxP_2	\N	RHDSPDPSPPRRARH	bio ado ado-RHDSPDPSPPRRARH	0.164214	0.0066139	6	2	4.54722	HU (DAPF)	Bait concentration was adjusted to fit the profile to WT	2022.10.24.
BIN1	O00499	513-593	SH3	P551L	his6-MBP-TEVsite-SH3	C1orf122	Q6ZSJ8	25-39	PxxP_1	\N	GLGGRPPPQPPREER	bio ado ado-GLGGRPPPQPPREER	0.0153393	0.0263127	6	2	0	HU (DAPF)	Bait concentration was adjusted to fit the profile to WT	2022.10.24.
BIN1	O00499	513-593	SH3	P551L	his6-MBP-TEVsite-SH3	C1orf122	Q6ZSJ8	26-40	PxxP_2	\N	LGGRPPPQPPREERA	bio ado ado-LGGRPPPQPPREERA	0.0109983	0.0154839	6	2	0	HU (DAPF)	Bait concentration was adjusted to fit the profile to WT	2022.10.24.
BIN1	O00499	513-593	SH3	P551L	his6-MBP-TEVsite-SH3	CBL	P22681	488-502	PxxP_1	\N	APQASLPPVPPRLDL	bio ado ado-APQASLPPVPPRLDL	0.00637518	0.0356326	6	2	0	HU (DAPF)	Bait concentration was adjusted to fit the profile to WT	2022.10.24.
BIN1	O00499	513-593	SH3	P551L	his6-MBP-TEVsite-SH3	CBL	P22681	528-542	PxxP_2	\N	HKDKPLPVPPTLRDL	bio ado ado-HKDKPLPVPPTLRDL	-0.0192948	0.0248874	6	2	0	HU (DAPF)	Bait concentration was adjusted to fit the profile to WT	2022.10.24.
BIN1	O00499	513-593	SH3	P551L	his6-MBP-TEVsite-SH3	CBL	P22681	537-551	PxxP_3	\N	PTLRDLPPPPPPDRP	bio ado ado-PTLRDLPPPPPPDRP	0.0414623	0.00835727	6	2	0	HU (DAPF)	Bait concentration was adjusted to fit the profile to WT	2022.10.24.
BIN1	O00499	513-593	SH3	P551L	his6-MBP-TEVsite-SH3	CBL	P22681	539-553	PxxP_4	\N	LRDLPPPPPPDRPYS	bio ado ado-LRDLPPPPPPDRPYS	0.0276272	0.0394063	6	2	0	HU (DAPF)	Bait concentration was adjusted to fit the profile to WT	2022.10.24.
BIN1	O00499	513-593	SH3	P551L	his6-MBP-TEVsite-SH3	CBL	P22681	560-574	PxxP_5	\N	PQRRPLPCTPGDCPS	bio ado ado-PQRRPLPCTPGDCPS	-0.00305178	0.0233593	6	2	0	HU (DAPF)	Bait concentration was adjusted to fit the profile to WT	2022.10.24.
BIN1	O00499	513-593	SH3	P551L	his6-MBP-TEVsite-SH3	CBL	P22681	590-604	PxxP_6	\N	WLPRPIPKVPVSAPS	bio ado ado-WLPRPIPKVPVSAPS	-0.00206936	0.00841194	6	2	0	HU (DAPF)	Bait concentration was adjusted to fit the profile to WT	2022.10.24.
BIN1	O00499	513-593	SH3	P551L	his6-MBP-TEVsite-SH3	CBL	P22681	814-828	PxxP_7	\N	TEGSQVPERPPKPFP	bio ado ado-TEGSQVPERPPKPFP	0.0234494	0.0486833	6	2	0	HU (DAPF)	Bait concentration was adjusted to fit the profile to WT	2022.10.24.
BIN1	O00499	513-593	SH3	P551L	his6-MBP-TEVsite-SH3	CDC27	P30260	396-410	PxxP_1	\N	LKMKFPPKIPNRKTK	bio ado ado-LKMKFPPKIPNRKTK	0.496254	0.0103568	6	4	5.3205	HU (DAPF)	Bait concentration was adjusted to fit the profile to WT	2022.10.24.
BIN1	O00499	513-593	SH3	P551L	his6-MBP-TEVsite-SH3	DDX42	Q86XP3	183-197	PxxP_1	\N	YDSDGNPIAPTKKII	bio ado ado-YDSDGNPIAPTKKII	-0.00135806	0.0527704	6	2	0	HU (DAPF)	Bait concentration was adjusted to fit the profile to WT	2022.10.24.
BIN1	O00499	513-593	SH3	P551L	his6-MBP-TEVsite-SH3	DDX42	Q86XP3	23-37	PxxP_2	\N	AGKKEEPKLPQQSHS	bio ado ado-AGKKEEPKLPQQSHS	-0.0106847	0.0503776	6	2	0	HU (DAPF)	Bait concentration was adjusted to fit the profile to WT	2022.10.24.
BIN1	O00499	513-593	SH3	P551L	his6-MBP-TEVsite-SH3	DDX42	Q86XP3	920-934	PxxP_3	\N	ADGFAVPEPPKRKKS	bio ado ado-ADGFAVPEPPKRKKS	0.342319	0.0345444	6	2	5.008	HU (DAPF)	Bait concentration was adjusted to fit the profile to WT	2022.10.24.
BIN1	O00499	513-593	SH3	P551L	his6-MBP-TEVsite-SH3	DMBT1	Q9UGM3	215-229	PxxP_1	\N	WPVRISPPVPTEGSE	bio ado ado-WPVRISPPVPTEGSE	0.0179858	0.000125146	6	2	0	HU (DAPF)	Bait concentration was adjusted to fit the profile to WT	2022.10.24.
BIN1	O00499	513-593	SH3	P551L	his6-MBP-TEVsite-SH3	DNM2	P50570	313-327	PxxP_1	\N	EYKNFRPDDPTRKTK	bio ado ado-EYKNFRPDDPTRKTK	-0.0186652	0.0437864	6	2	0	HU (DAPF)	Bait concentration was adjusted to fit the profile to WT	2022.10.24.
BIN1	O00499	513-593	SH3	P551L	his6-MBP-TEVsite-SH3	DNM2	P50570	801-815	PxxP_2	\N	AASFSAPPIPSRPGP	bio ado ado-AASFSAPPIPSRPGP	-0.00706355	0.0379179	6	2	0	HU (DAPF)	Bait concentration was adjusted to fit the profile to WT	2022.10.24.
BIN1	O00499	513-593	SH3	P551L	his6-MBP-TEVsite-SH3	DNM2	P50570	823-837	PxxP_3	\N	DLFPAPPQIPSRPVR	bio ado ado-DLFPAPPQIPSRPVR	0.0925939	0.042741	6	2	4.24841	HU (DAPF)	Bait concentration was adjusted to fit the profile to WT	2022.10.24.
BIN1	O00499	513-593	SH3	P551L	his6-MBP-TEVsite-SH3	DNM2	P50570	826-840	PxxP_4	\N	PAPPQIPSRPVRIPP	bio ado ado-PAPPQIPSRPVRIPP	0.0167812	0.0162257	6	2	0	HU (DAPF)	Bait concentration was adjusted to fit the profile to WT	2022.10.24.
BIN1	O00499	513-593	SH3	P551L	his6-MBP-TEVsite-SH3	DNM2	P50570	834-848	PxxP_5	\N	RPVRIPPGIPPGVPS	bio ado ado-RPVRIPPGIPPGVPS	0.0250346	0.0284517	6	2	0	HU (DAPF)	Bait concentration was adjusted to fit the profile to WT	2022.10.24.
BIN1	O00499	513-593	SH3	P551L	his6-MBP-TEVsite-SH3	DNM2	P50570	838-852	PxxP_6	\N	IPPGIPPGVPSRRPP	bio ado ado-IPPGIPPGVPSRRPP	0.0388672	0.0253153	6	2	0	HU (DAPF)	Bait concentration was adjusted to fit the profile to WT	2022.10.24.
BIN1	O00499	513-593	SH3	P551L	his6-MBP-TEVsite-SH3	DNM2	P50570	846-860	PxxP_7	\N	VPSRRPPAAPSRPTI	bio ado ado-VPSRRPPAAPSRPTI	0.0374453	0.0413838	6	4	0	HU (DAPF)	Bait concentration was adjusted to fit the profile to WT	2022.10.24.
BIN1	O00499	513-593	SH3	P551L	his6-MBP-TEVsite-SH3	DNMT1	P26358	129-143	PxxP_1	\N	PKPLSKPRTPRRSKS	bio ado ado-PKPLSKPRTPRRSKS	0.26659	0.0186639	6	2	4.83566	HU (DAPF)	Bait concentration was adjusted to fit the profile to WT	2022.10.24.
BIN1	O00499	513-593	SH3	P551L	his6-MBP-TEVsite-SH3	DNMT1	P26358	323-337	PxxP_2	\N	KRRKTTPKEPTEKKM	bio ado ado-KRRKTTPKEPTEKKM	0.0500936	0.0258578	6	2	3.95348	HU (DAPF)	Bait concentration was adjusted to fit the profile to WT	2022.10.24.
BIN1	O00499	513-593	SH3	P551L	his6-MBP-TEVsite-SH3	EZH2	Q15910	341-355	PxxP_1	\N	ERIKTPPKRPGGRRR	bio ado ado-ERIKTPPKRPGGRRR	0.177513	0.0430533	6	2	4.59071	HU (DAPF)	Bait concentration was adjusted to fit the profile to WT	2022.10.24.
BIN1	O00499	513-593	SH3	P551L	his6-MBP-TEVsite-SH3	G3BP1	Q13283	288-302	PxxP_1	\N	PESQIPPQRPQRDQR	bio ado ado-PESQIPPQRPQRDQR	0.038857	0.0295643	6	2	0	HU (DAPF)	Bait concentration was adjusted to fit the profile to WT	2022.10.24.
BIN1	O00499	513-593	SH3	P551L	his6-MBP-TEVsite-SH3	HDGFL2	Q7Z4V5	288-302	PxxP_1	\N	RGRKPKPERPPSSSS	bio ado ado-RGRKPKPERPPSSSS	0.0334707	0.00429203	6	2	0	HU (DAPF)	Bait concentration was adjusted to fit the profile to WT	2022.10.24.
BIN1	O00499	513-593	SH3	P551L	his6-MBP-TEVsite-SH3	HIRIP3	Q9BW71	531-545	PxxP_1	\N	DEERPRPAPPDWSHM	bio ado ado-DEERPRPAPPDWSHM	0.0270038	0.0642057	6	2	0	HU (DAPF)	Bait concentration was adjusted to fit the profile to WT	2022.10.24.
BIN1	O00499	513-593	SH3	P551L	his6-MBP-TEVsite-SH3	HMGA1	P17096	28-42	PxxP_1	\N	RPRKQPPVSPGTALV	bio ado ado-RPRKQPPVSPGTALV	0.0699938	0.00405305	6	2	4.1118	HU (DAPF)	Bait concentration was adjusted to fit the profile to WT	2022.10.24.
BIN1	O00499	513-593	SH3	P551L	his6-MBP-TEVsite-SH3	HNRNPK	P61978	266-280	PxxP_1	\N	PGRGGRPMPPSRRDY	bio ado ado-PGRGGRPMPPSRRDY	0.1784	0.0214004	6	2	4.59352	HU (DAPF)	Bait concentration was adjusted to fit the profile to WT	2022.10.24.
BIN1	O00499	513-593	SH3	P551L	his6-MBP-TEVsite-SH3	HNRNPK	P61978	283-297	PxxP_2	\N	MSPRRGPPPPPPGRG	bio ado ado-MSPRRGPPPPPPGRG	0.0823715	0.00785724	6	2	4.19074	HU (DAPF)	Bait concentration was adjusted to fit the profile to WT	2022.10.24.
BIN1	O00499	513-593	SH3	P551L	his6-MBP-TEVsite-SH3	HNRNPK	P61978	284-298	PxxP_3	\N	SPRRGPPPPPPGRGG	bio ado ado-SPRRGPPPPPPGRGG	0.100226	0.019645	6	2	4.28798	HU (DAPF)	Bait concentration was adjusted to fit the profile to WT	2022.10.24.
BIN1	O00499	513-593	SH3	P551L	his6-MBP-TEVsite-SH3	HNRNPK	P61978	285-299	PxxP_4	\N	PRRGPPPPPPGRGGR	bio ado ado-PRRGPPPPPPGRGGR	0.154305	0.0154861	6	2	4.51307	HU (DAPF)	Bait concentration was adjusted to fit the profile to WT	2022.10.24.
BIN1	O00499	513-593	SH3	P551L	his6-MBP-TEVsite-SH3	HNRNPK	P61978	302-316	PxxP_5	\N	SRARNLPLPPPPPPR	bio ado ado-SRARNLPLPPPPPPR	0.141231	0.0118743	6	2	4.46533	HU (DAPF)	Bait concentration was adjusted to fit the profile to WT	2022.10.24.
BIN1	O00499	513-593	SH3	P551L	his6-MBP-TEVsite-SH3	HNRNPK	P61978	305-319	PxxP_6	\N	RNLPLPPPPPPRGGD	bio ado ado-RNLPLPPPPPPRGGD	0.0512337	0.0133446	6	2	3.964	HU (DAPF)	Bait concentration was adjusted to fit the profile to WT	2022.10.24.
BIN1	O00499	513-593	SH3	P551L	his6-MBP-TEVsite-SH3	IRF2BP1	Q8IU81	361-375	PxxP_1	\N	ALCGPPPRAPSRNLA	bio ado ado-ALCGPPPRAPSRNLA	0.109843	0.00662966	6	2	4.33433	HU (DAPF)	Bait concentration was adjusted to fit the profile to WT	2022.10.24.
BIN1	O00499	513-593	SH3	P551L	his6-MBP-TEVsite-SH3	KHDRBS1	Q07666	32-46	PxxP_1	\N	QTPSRQPPLPHRSRG	bio ado ado-QTPSRQPPLPHRSRG	0.0626915	0.0306749	6	2	4.05914	HU (DAPF)	Bait concentration was adjusted to fit the profile to WT	2022.10.24.
BIN1	O00499	513-593	SH3	P551L	his6-MBP-TEVsite-SH3	KHDRBS1	Q07666	328-342	PxxP_2	\N	TVTRGVPPPPTVRGA	bio ado ado-TVTRGVPPPPTVRGA	0.0334935	0.0255826	6	2	0	HU (DAPF)	Bait concentration was adjusted to fit the profile to WT	2022.10.24.
BIN1	O00499	513-593	SH3	P551L	his6-MBP-TEVsite-SH3	KHDRBS1	Q07666	421-435	PxxP_3	\N	PSLKAPPARPVKGAY	bio ado ado-PSLKAPPARPVKGAY	0.0116576	0.0402886	6	4	0	HU (DAPF)	Bait concentration was adjusted to fit the profile to WT	2022.10.24.
BIN1	O00499	513-593	SH3	P551L	his6-MBP-TEVsite-SH3	MKI67	P46013	1083-1097	PxxP_1	\N	TGMKKWPRTPKEEAQ	bio ado ado-TGMKKWPRTPKEEAQ	0.0628668	0.0551542	6	2	4.06046	HU (DAPF)	Bait concentration was adjusted to fit the profile to WT	2022.10.24.
BIN1	O00499	513-593	SH3	P551L	his6-MBP-TEVsite-SH3	MKI67	P46013	1327-1341	PxxP_2	\N	TGSKRRPQTPKEEAQ	bio ado ado-TGSKRRPQTPKEEAQ	0.000310857	0.00455245	6	2	0	HU (DAPF)	Bait concentration was adjusted to fit the profile to WT	2022.10.24.
BIN1	O00499	513-593	SH3	P551L	his6-MBP-TEVsite-SH3	MKI67	P46013	1385-1399	PxxP_3	\N	TSTRRQPKTPLEKRD	bio ado ado-TSTRRQPKTPLEKRD	0.0544373	0.0150072	6	2	3.99242	HU (DAPF)	Bait concentration was adjusted to fit the profile to WT	2022.10.24.
BIN1	O00499	513-593	SH3	P551L	his6-MBP-TEVsite-SH3	MKI67	P46013	1935-1949	PxxP_4	\N	PGSKRRPQTPKEKAK	bio ado ado-PGSKRRPQTPKEKAK	0.0535064	0.0193395	6	2	3.98433	HU (DAPF)	Bait concentration was adjusted to fit the profile to WT	2022.10.24.
BIN1	O00499	513-593	SH3	P551L	his6-MBP-TEVsite-SH3	MKI67	P46013	2115-2129	PxxP_5	\N	TSTRRRPKTPLGKRD	bio ado ado-TSTRRRPKTPLGKRD	0.064162	0.0082054	6	2	4.07017	HU (DAPF)	Bait concentration was adjusted to fit the profile to WT	2022.10.24.
BIN1	O00499	513-593	SH3	P551L	his6-MBP-TEVsite-SH3	MKI67	P46013	2175-2189	PxxP_6	\N	TGSKRQPRTPKGKAQ	bio ado ado-TGSKRQPRTPKGKAQ	0.0310121	0.0107182	6	2	0	HU (DAPF)	Bait concentration was adjusted to fit the profile to WT	2022.10.24.
BIN1	O00499	513-593	SH3	P551L	his6-MBP-TEVsite-SH3	MKI67	P46013	2297-2311	PxxP_7	\N	PGSKRWPQTPKEKAQ	bio ado ado-PGSKRWPQTPKEKAQ	0.0112782	0.0210794	6	2	0	HU (DAPF)	Bait concentration was adjusted to fit the profile to WT	2022.10.24.
BIN1	O00499	513-593	SH3	P551L	his6-MBP-TEVsite-SH3	MKI67	P46013	2418-2432	PxxP_8	\N	PGSKRQPQTPKEKAE	bio ado ado-PGSKRQPQTPKEKAE	0.0275396	0.0062884	6	2	0	HU (DAPF)	Bait concentration was adjusted to fit the profile to WT	2022.10.24.
BIN1	O00499	513-593	SH3	P551L	his6-MBP-TEVsite-SH3	MKI67	P46013	2660-2674	PxxP_9	\N	EPSRRRPRAPKEKAQ	bio ado ado-EPSRRRPRAPKEKAQ	0.0522946	0.0105283	6	2	3.97359	HU (DAPF)	Bait concentration was adjusted to fit the profile to WT	2022.10.24.
BIN1	O00499	513-593	SH3	P551L	his6-MBP-TEVsite-SH3	MKI67	P46013	2781-2795	PxxP_10	\N	TGSRRRPRAPRESAQ	bio ado ado-TGSRRRPRAPRESAQ	0.0274864	0.000664588	6	2	0	HU (DAPF)	Bait concentration was adjusted to fit the profile to WT	2022.10.24.
BIN1	O00499	513-593	SH3	P551L	his6-MBP-TEVsite-SH3	MKI67	P46013	2899-2913	PxxP_11	\N	IGSRRQPRAPKEKAQ	bio ado ado-IGSRRQPRAPKEKAQ	0.0434804	0.0154568	6	2	0	HU (DAPF)	Bait concentration was adjusted to fit the profile to WT	2022.10.24.
BIN1	O00499	513-593	SH3	P551L	his6-MBP-TEVsite-SH3	MKI67	P46013	2986-3000	PxxP_12	\N	KSNTSLPPLPFKRGG	bio ado ado-KSNTSLPPLPFKRGG	0.0597859	0.0241618	6	2	4.03662	HU (DAPF)	Bait concentration was adjusted to fit the profile to WT	2022.10.24.
BIN1	O00499	513-593	SH3	P551L	his6-MBP-TEVsite-SH3	MKI67	P46013	517-531	PxxP_13	\N	FDENLPPNTPLKRGE	bio ado ado-FDENLPPNTPLKRGE	6.46848e-05	0.00758987	6	2	0	HU (DAPF)	Bait concentration was adjusted to fit the profile to WT	2022.10.24.
BIN1	O00499	513-593	SH3	P551L	his6-MBP-TEVsite-SH3	MKI67	P46013	686-700	PxxP_14	\N	NKRQRRPATPKKPVG	bio ado ado-NKRQRRPATPKKPVG	0.0300612	0.037812	6	2	0	HU (DAPF)	Bait concentration was adjusted to fit the profile to WT	2022.10.24.
BIN1	O00499	513-593	SH3	P551L	his6-MBP-TEVsite-SH3	MUC5AC	P98088	1311-1325	PxxP_1	\N	IERRVYPCSPTTPVP	bio ado ado-IERRVYPCSPTTPVP	0.0218461	0.00168626	6	2	0	HU (DAPF)	Bait concentration was adjusted to fit the profile to WT	2022.10.24.
BIN1	O00499	513-593	SH3	P551L	his6-MBP-TEVsite-SH3	MUC5AC	P98088	1563-1577	PxxP_2	\N	VSSKPTPTEPSTSSC	bio ado ado-VSSKPTPTEPSTSSC	0.0396798	0.0229163	6	2	0	HU (DAPF)	Bait concentration was adjusted to fit the profile to WT	2022.10.24.
BIN1	O00499	513-593	SH3	P551L	his6-MBP-TEVsite-SH3	MUC5AC	P98088	1936-1950	PxxP_3	\N	VSSKPTPTEPSTSSC	bio ado ado-VSSKPTPTEPSTSSC	0.0223976	0.0867314	6	2	0	HU (DAPF)	Bait concentration was adjusted to fit the profile to WT	2022.10.24.
BIN1	O00499	513-593	SH3	P551L	his6-MBP-TEVsite-SH3	MUC5AC	P98088	5643-5657	PxxP_4	\N	SWERGVPVSPMH---	bio ado ado-SWERGVPVSPMH---	0.061187	0.0696691	6	2	4.0476	HU (DAPF)	Bait concentration was adjusted to fit the profile to WT	2022.10.24.
BIN1	O00499	513-593	SH3	P551L	his6-MBP-TEVsite-SH3	NOLC1	Q14978	193-207	PxxP_1	\N	KAQTKAPPKPARAAP	bio ado ado-KAQTKAPPKPARAAP	0.0269169	0.0457504	6	2	0	HU (DAPF)	Bait concentration was adjusted to fit the profile to WT	2022.10.24.
BIN1	O00499	513-593	SH3	P551L	his6-MBP-TEVsite-SH3	PKN1	Q16512	565-579	PxxP_1	\N	KSSRDPPSSPSSLSS	bio ado ado-KSSRDPPSSPSSLSS	-0.0413815	0.0458925	6	2	0	HU (DAPF)	Bait concentration was adjusted to fit the profile to WT	2022.10.24.
BIN1	O00499	513-593	SH3	P551L	his6-MBP-TEVsite-SH3	PPP1R12A	O14974	401-415	PxxP_1	\N	SSGQATPTSPIKKFP	bio ado ado-SSGQATPTSPIKKFP	0.0432304	0.0109232	6	2	0	HU (DAPF)	Bait concentration was adjusted to fit the profile to WT	2022.10.24.
BIN1	O00499	513-593	SH3	P551L	his6-MBP-TEVsite-SH3	PPP1R12A	O14974	493-507	PxxP_2	\N	RLAYVAPTIPRRLAS	bio ado ado-RLAYVAPTIPRRLAS	0.0512109	0.0636851	6	2	3.96379	HU (DAPF)	Bait concentration was adjusted to fit the profile to WT	2022.10.24.
BIN1	O00499	513-593	SH3	P551L	his6-MBP-TEVsite-SH3	PRRC2A	P48634	1192-1206	PxxP_1	\N	LAPKKPPTGPLPPSK	bio ado ado-LAPKKPPTGPLPPSK	-0.0249759	0.0183056	6	2	0	HU (DAPF)	Bait concentration was adjusted to fit the profile to WT	2022.10.24.
BIN1	O00499	513-593	SH3	P551L	his6-MBP-TEVsite-SH3	PRRC2A	P48634	1195-1209	PxxP_2	\N	KKPPTGPLPPSKEPL	bio ado ado-KKPPTGPLPPSKEPL	-0.0128332	0.0354026	6	2	0	HU (DAPF)	Bait concentration was adjusted to fit the profile to WT	2022.10.24.
BIN1	O00499	513-593	SH3	P551L	his6-MBP-TEVsite-SH3	PRRC2A	P48634	120-134	PxxP_3	\N	NQPKRPPAAPENTPL	bio ado ado-NQPKRPPAAPENTPL	0.0355227	0.0430191	6	2	0	HU (DAPF)	Bait concentration was adjusted to fit the profile to WT	2022.10.24.
BIN1	O00499	513-593	SH3	P551L	his6-MBP-TEVsite-SH3	PRRC2A	P48634	1495-1509	PxxP_4	\N	GHPRHKPGLPQAPQG	bio ado ado-GHPRHKPGLPQAPQG	0.00544513	0.0516745	6	2	0	HU (DAPF)	Bait concentration was adjusted to fit the profile to WT	2022.10.24.
BIN1	O00499	513-593	SH3	P551L	his6-MBP-TEVsite-SH3	PRRC2A	P48634	1506-1520	PxxP_5	\N	APQGPSPRPPTRYEP	bio ado ado-APQGPSPRPPTRYEP	-0.0222965	0.0478941	6	2	0	HU (DAPF)	Bait concentration was adjusted to fit the profile to WT	2022.10.24.
BIN1	O00499	513-593	SH3	P551L	his6-MBP-TEVsite-SH3	PRRC2A	P48634	1549-1563	PxxP_6	\N	DSAGVSPFPPKRRER	bio ado ado-DSAGVSPFPPKRRER	0.289174	0.0268548	6	2	4.88939	HU (DAPF)	Bait concentration was adjusted to fit the profile to WT	2022.10.24.
BIN1	O00499	513-593	SH3	P551L	his6-MBP-TEVsite-SH3	PRRC2A	P48634	1705-1719	PxxP_7	\N	EPPRRPPPAPHDGDR	bio ado ado-EPPRRPPPAPHDGDR	0.0177989	0.0170653	6	2	0	HU (DAPF)	Bait concentration was adjusted to fit the profile to WT	2022.10.24.
BIN1	O00499	513-593	SH3	P551L	his6-MBP-TEVsite-SH3	PRRC2A	P48634	1721-1735	PxxP_8	\N	ELPREQPLPPGPIGT	bio ado ado-ELPREQPLPPGPIGT	0.0161293	0.0197204	6	2	0	HU (DAPF)	Bait concentration was adjusted to fit the profile to WT	2022.10.24.
BIN1	O00499	513-593	SH3	P551L	his6-MBP-TEVsite-SH3	PRRC2A	P48634	261-275	PxxP_9	\N	FPPPYGPQGPYRYPT	bio ado ado-FPPPYGPQGPYRYPT	-0.00149407	0.0114829	6	2	0	HU (DAPF)	Bait concentration was adjusted to fit the profile to WT	2022.10.24.
BIN1	O00499	513-593	SH3	P551L	his6-MBP-TEVsite-SH3	PRRC2A	P48634	270-284	PxxP_10	\N	PYRYPTPDGPSRFPR	bio ado ado-PYRYPTPDGPSRFPR	0.0326045	0.0282788	6	2	0	HU (DAPF)	Bait concentration was adjusted to fit the profile to WT	2022.10.24.
BIN1	O00499	513-593	SH3	P551L	his6-MBP-TEVsite-SH3	PRRC2A	P48634	502-516	PxxP_11	\N	KRLKAEPAAPPAAPS	bio ado ado-KRLKAEPAAPPAAPS	-0.00292796	0.00725087	6	2	0	HU (DAPF)	Bait concentration was adjusted to fit the profile to WT	2022.10.24.
BIN1	O00499	513-593	SH3	P551L	his6-MBP-TEVsite-SH3	PRRC2A	P48634	523-537	PxxP_12	\N	AVPKELPAPPAPPPA	bio ado ado-AVPKELPAPPAPPPA	0.0214454	0.0158058	6	2	0	HU (DAPF)	Bait concentration was adjusted to fit the profile to WT	2022.10.24.
BIN1	O00499	513-593	SH3	P551L	his6-MBP-TEVsite-SH3	PRRC2A	P48634	585-599	PxxP_13	\N	EASPVEPQLPSKEGP	bio ado ado-EASPVEPQLPSKEGP	-0.00413029	0.0514834	6	2	0	HU (DAPF)	Bait concentration was adjusted to fit the profile to WT	2022.10.24.
BIN1	O00499	513-593	SH3	P551L	his6-MBP-TEVsite-SH3	PRRC2A	P48634	593-607	PxxP_14	\N	LPSKEGPEPPEEVPP	bio ado ado-LPSKEGPEPPEEVPP	-0.0366489	0.0280466	6	2	0	HU (DAPF)	Bait concentration was adjusted to fit the profile to WT	2022.10.24.
BIN1	O00499	513-593	SH3	P551L	his6-MBP-TEVsite-SH3	PRRC2A	P48634	690-704	PxxP_15	\N	VPAPQAPPPPPKALY	bio ado ado-VPAPQAPPPPPKALY	-0.019789	0.0294631	6	2	0	HU (DAPF)	Bait concentration was adjusted to fit the profile to WT	2022.10.24.
BIN1	O00499	513-593	SH3	P551L	his6-MBP-TEVsite-SH3	PRRC2A	P48634	707-721	PxxP_16	\N	ALGRPPPMPPMNFDP	bio ado ado-ALGRPPPMPPMNFDP	-0.020841	0.008412	6	2	0	HU (DAPF)	Bait concentration was adjusted to fit the profile to WT	2022.10.24.
BIN1	O00499	513-593	SH3	P551L	his6-MBP-TEVsite-SH3	PRRC2A	P48634	859-873	PxxP_17	\N	PGPRPLPWPPGSDEV	bio ado ado-PGPRPLPWPPGSDEV	-0.0204966	0.0810317	6	2	0	HU (DAPF)	Bait concentration was adjusted to fit the profile to WT	2022.10.24.
BIN1	O00499	513-593	SH3	P551L	his6-MBP-TEVsite-SH3	PRRC2A	P48634	907-921	PxxP_18	\N	GSGGQGPPPPRRESR	bio ado ado-GSGGQGPPPPRRESR	0.0591722	0.0178011	6	2	4.03174	HU (DAPF)	Bait concentration was adjusted to fit the profile to WT	2022.10.24.
BIN1	O00499	513-593	SH3	P551L	his6-MBP-TEVsite-SH3	PRRC2A	P48634	936-950	PxxP_19	\N	GIPPEEPGAPPRRAG	bio ado ado-GIPPEEPGAPPRRAG	0.0310745	0.00155654	6	2	0	HU (DAPF)	Bait concentration was adjusted to fit the profile to WT	2022.10.24.
BIN1	O00499	513-593	SH3	P551L	his6-MBP-TEVsite-SH3	PRRC2A	P48634	949-963	PxxP_20	\N	AGPIKKPPPPTKVEE	bio ado ado-AGPIKKPPPPTKVEE	0.0306209	0.000519611	6	2	0	HU (DAPF)	Bait concentration was adjusted to fit the profile to WT	2022.10.24.
BIN1	O00499	513-593	SH3	P551L	his6-MBP-TEVsite-SH3	PRRC2C	Q9Y520	1053-1067	PxxP_1	\N	TEKKDLPPPPPPPQP	bio ado ado-TEKKDLPPPPPPPQP	-0.0569855	0.077328	6	2	0	HU (DAPF)	Bait concentration was adjusted to fit the profile to WT	2022.10.24.
BIN1	O00499	513-593	SH3	P551L	his6-MBP-TEVsite-SH3	PRRC2C	Q9Y520	1226-1240	PxxP_2	\N	PRAEHIPSGPLRQRE	bio ado ado-PRAEHIPSGPLRQRE	0.00833275	0.0328853	6	2	0	HU (DAPF)	Bait concentration was adjusted to fit the profile to WT	2022.10.24.
BIN1	O00499	513-593	SH3	P551L	his6-MBP-TEVsite-SH3	PRRC2C	Q9Y520	1419-1433	PxxP_3	\N	RPRRQRPTRPPRQDK	bio ado ado-RPRRQRPTRPPRQDK	0.409381	0.0129178	6	4	5.14748	HU (DAPF)	Bait concentration was adjusted to fit the profile to WT	2022.10.24.
BIN1	O00499	513-593	SH3	P551L	his6-MBP-TEVsite-SH3	PRRC2C	Q9Y520	1630-1644	PxxP_4	\N	EDPKPGPKKPKEKVD	bio ado ado-EDPKPGPKKPKEKVD	0.00612282	0.0869573	6	2	0	HU (DAPF)	Bait concentration was adjusted to fit the profile to WT	2022.10.24.
BIN1	O00499	513-593	SH3	P551L	his6-MBP-TEVsite-SH3	PRRC2C	Q9Y520	2005-2019	PxxP_5	\N	ISKKLGPISPPQPPS	bio ado ado-ISKKLGPISPPQPPS	0.0259227	0.0128475	6	2	0	HU (DAPF)	Bait concentration was adjusted to fit the profile to WT	2022.10.24.
BIN1	O00499	513-593	SH3	P551L	his6-MBP-TEVsite-SH3	PRRC2C	Q9Y520	2877-2891	PxxP_6	\N	KPVRTGPIKPQAIKT	bio ado ado-KPVRTGPIKPQAIKT	0.0231418	0.0138578	6	2	0	HU (DAPF)	Bait concentration was adjusted to fit the profile to WT	2022.10.24.
BIN1	O00499	513-593	SH3	P551L	his6-MBP-TEVsite-SH3	PRRC2C	Q9Y520	596-610	PxxP_7	\N	LEEKIEPREPNLEPM	bio ado ado-LEEKIEPREPNLEPM	-0.00888912	0.0225694	6	2	0	HU (DAPF)	Bait concentration was adjusted to fit the profile to WT	2022.10.24.
BIN1	O00499	513-593	SH3	P551L	his6-MBP-TEVsite-SH3	PRRC2C	Q9Y520	704-718	PxxP_8	\N	PSSSTVPPPPHRPLY	bio ado ado-PSSSTVPPPPHRPLY	0.00395506	0.0372946	6	2	0	HU (DAPF)	Bait concentration was adjusted to fit the profile to WT	2022.10.24.
BIN1	O00499	513-593	SH3	P551L	his6-MBP-TEVsite-SH3	RB1	P06400	244-258	PxxP_1	\N	IPINGSPRTPRRGQN	bio ado ado-IPINGSPRTPRRGQN	0.0622854	0.0700097	6	2	4.05605	HU (DAPF)	Bait concentration was adjusted to fit the profile to WT	2022.10.24.
BIN1	O00499	513-593	SH3	P551L	his6-MBP-TEVsite-SH3	RB1	P06400	365-379	PxxP_2	\N	EVNVIPPHTPVRTVM	bio ado ado-EVNVIPPHTPVRTVM	0.0176055	0.00547711	6	2	0	HU (DAPF)	Bait concentration was adjusted to fit the profile to WT	2022.10.24.
BIN1	O00499	513-593	SH3	P551L	his6-MBP-TEVsite-SH3	RB1	P06400	780-794	PxxP_3	\N	SPIPHIPRSPYKFPS	bio ado ado-SPIPHIPRSPYKFPS	0.033404	0.0262701	6	2	0	HU (DAPF)	Bait concentration was adjusted to fit the profile to WT	2022.10.24.
BIN1	O00499	513-593	SH3	P551L	his6-MBP-TEVsite-SH3	RB1	P06400	787-801	PxxP_4	\N	RSPYKFPSSPLRIPG	bio ado ado-RSPYKFPSSPLRIPG	0.0223862	0.0196597	6	2	0	HU (DAPF)	Bait concentration was adjusted to fit the profile to WT	2022.10.24.
BIN1	O00499	513-593	SH3	P551L	his6-MBP-TEVsite-SH3	RB1	P06400	862-876	PxxP_5	\N	SAEGSNPPKPLKKLR	bio ado ado-SAEGSNPPKPLKKLR	0.060569	0.0266143	6	2	4.04279	HU (DAPF)	Bait concentration was adjusted to fit the profile to WT	2022.10.24.
BIN1	O00499	513-593	SH3	P551L	his6-MBP-TEVsite-SH3	SH3KBP1	Q96B97	360-374	PxxP_1	\N	EIKKIPPERPEMLPN	bio ado ado-EIKKIPPERPEMLPN	0.00318005	0.0494208	6	2	0	HU (DAPF)	Bait concentration was adjusted to fit the profile to WT	2022.10.24.
BIN1	O00499	513-593	SH3	P551L	his6-MBP-TEVsite-SH3	SH3KBP1	Q96B97	390-404	PxxP_2	\N	LQKPSVPAIPPKKPR	bio ado ado-LQKPSVPAIPPKKPR	0.136508	0.0403901	6	2	4.44723	HU (DAPF)	Bait concentration was adjusted to fit the profile to WT	2022.10.24.
BIN1	O00499	513-593	SH3	P551L	his6-MBP-TEVsite-SH3	SH3KBP1	Q96B97	413-427	PxxP_3	\N	RPGALPPRRPERPVG	bio ado ado-RPGALPPRRPERPVG	-0.0157786	0.0767912	6	2	0	HU (DAPF)	Bait concentration was adjusted to fit the profile to WT	2022.10.24.
BIN1	O00499	513-593	SH3	P551L	his6-MBP-TEVsite-SH3	SMCHD1	A6NHR9	1139-1153	PxxP_1	\N	FTVRPLPDEPKHLKC	bio ado ado-FTVRPLPDEPKHLKC	0.00531117	0.0225192	6	2	0	HU (DAPF)	Bait concentration was adjusted to fit the profile to WT	2022.10.24.
BIN1	O00499	513-593	SH3	P551L	his6-MBP-TEVsite-SH3	SMCHD1	A6NHR9	1977-1991	PxxP_2	\N	VETTDCPVPPKRMRR	bio ado ado-VETTDCPVPPKRMRR	0.641063	0.00242774	6	2	5.61507	HU (DAPF)	Bait concentration was adjusted to fit the profile to WT	2022.10.24.
BIN1	O00499	513-593	SH3	P551L	his6-MBP-TEVsite-SH3	SMCHD1	A6NHR9	437-451	PxxP_3	\N	ETYPDDPCFPSKLKD	bio ado ado-ETYPDDPCFPSKLKD	-0.0108479	0.0406126	6	2	0	HU (DAPF)	Bait concentration was adjusted to fit the profile to WT	2022.10.24.
BIN1	O00499	513-593	SH3	P551L	his6-MBP-TEVsite-SH3	SRRM1	Q8IYB3	327-341	PxxP_1	\N	TPPRRMPPPPRHRRS	bio ado ado-TPPRRMPPPPRHRRS	0.304638	0.00917845	6	2	4.92491	HU (DAPF)	Bait concentration was adjusted to fit the profile to WT	2022.10.24.
BIN1	O00499	513-593	SH3	P551L	his6-MBP-TEVsite-SH3	SRRM1	Q8IYB3	365-379	PxxP_2	\N	SRSRSPPKKPPKRTS	bio ado ado-SRSRSPPKKPPKRTS	0.213705	0.0353347	6	4	4.69828	HU (DAPF)	Bait concentration was adjusted to fit the profile to WT	2022.10.24.
BIN1	O00499	513-593	SH3	P551L	his6-MBP-TEVsite-SH3	SRRM1	Q8IYB3	395-409	PxxP_3	\N	PRRRHRPSPPATPPP	bio ado ado-PRRRHRPSPPATPPP	0.162557	0.0479157	6	2	4.54162	HU (DAPF)	Bait concentration was adjusted to fit the profile to WT	2022.10.24.
BIN1	O00499	513-593	SH3	P551L	his6-MBP-TEVsite-SH3	SRRM1	Q8IYB3	544-558	PxxP_4	\N	GRRRRSPSPPPTRRR	bio ado ado-GRRRRSPSPPPTRRR	0.504494	0.026297	6	2	5.33679	HU (DAPF)	Bait concentration was adjusted to fit the profile to WT	2022.10.24.
BIN1	O00499	513-593	SH3	P551L	his6-MBP-TEVsite-SH3	SRRM1	Q8IYB3	557-571	PxxP_5	\N	RRRSPSPAPPPRRRR	bio ado ado-RRRSPSPAPPPRRRR	0.705078	0.0325048	6	2	5.75873	HU (DAPF)	Bait concentration was adjusted to fit the profile to WT	2022.10.24.
BIN1	O00499	513-593	SH3	P551L	his6-MBP-TEVsite-SH3	SRRM1	Q8IYB3	567-581	PxxP_6	\N	PRRRRTPTPPPRRRT	bio ado ado-PRRRRTPTPPPRRRT	0.727412	0.0238123	6	4	5.81257	HU (DAPF)	Bait concentration was adjusted to fit the profile to WT	2022.10.24.
BIN1	O00499	513-593	SH3	P551L	his6-MBP-TEVsite-SH3	SRRM1	Q8IYB3	576-590	PxxP_7	\N	PPRRRTPSPPPRRRS	bio ado ado-PPRRRTPSPPPRRRS	0.693169	0.0160433	6	4	5.73092	HU (DAPF)	Bait concentration was adjusted to fit the profile to WT	2022.10.24.
BIN1	O00499	513-593	SH3	P551L	his6-MBP-TEVsite-SH3	SRRM1	Q8IYB3	600-614	PxxP_8	\N	IQRRYSPSPPPKRRT	bio ado ado-IQRRYSPSPPPKRRT	0.294023	0.0156717	6	4	4.90063	HU (DAPF)	Bait concentration was adjusted to fit the profile to WT	2022.10.24.
BIN1	O00499	513-593	SH3	P551L	his6-MBP-TEVsite-SH3	SRRM1	Q8IYB3	611-625	PxxP_9	\N	KRRTASPPPPPKRRA	bio ado ado-KRRTASPPPPPKRRA	0.273172	0.0222744	6	2	4.85157	HU (DAPF)	Bait concentration was adjusted to fit the profile to WT	2022.10.24.
BIN1	O00499	513-593	SH3	P551L	his6-MBP-TEVsite-SH3	SRRM1	Q8IYB3	612-626	PxxP_10	\N	RRTASPPPPPKRRAS	bio ado ado-RRTASPPPPPKRRAS	0.313112	0.0157022	6	2	4.94399	HU (DAPF)	Bait concentration was adjusted to fit the profile to WT	2022.10.24.
BIN1	O00499	513-593	SH3	P551L	his6-MBP-TEVsite-SH3	SRRM1	Q8IYB3	621-635	PxxP_11	\N	PKRRASPSPPPKRRV	bio ado ado-PKRRASPSPPPKRRV	0.321208	0.00343106	6	4	4.96199	HU (DAPF)	Bait concentration was adjusted to fit the profile to WT	2022.10.24.
BIN1	O00499	513-593	SH3	P551L	his6-MBP-TEVsite-SH3	SRRM1	Q8IYB3	759-773	PxxP_12	\N	PAAKKPPAPPSPVQS	bio ado ado-PAAKKPPAPPSPVQS	-0.0151905	0.0682656	6	2	0	HU (DAPF)	Bait concentration was adjusted to fit the profile to WT	2022.10.24.
BIN1	O00499	513-593	SH3	P551L	his6-MBP-TEVsite-SH3	SRRM1	Q8IYB3	776-790	PxxP_13	\N	PSTNWSPAVPVKKAK	bio ado ado-PSTNWSPAVPVKKAK	0.0378178	0.00615037	6	2	0	HU (DAPF)	Bait concentration was adjusted to fit the profile to WT	2022.10.24.
BIN1	O00499	513-593	SH3	P551L	his6-MBP-TEVsite-SH3	SRRM2	Q9UQ35	1405-1419	PxxP_1	\N	PVLDAVPRTPSRERS	bio ado ado-PVLDAVPRTPSRERS	-0.0289769	0.0293219	6	2	0	HU (DAPF)	Bait concentration was adjusted to fit the profile to WT	2022.10.24.
BIN1	O00499	513-593	SH3	P551L	his6-MBP-TEVsite-SH3	SRRM2	Q9UQ35	1426-1440	PxxP_2	\N	EMKDGLPRTPSRRSR	bio ado ado-EMKDGLPRTPSRRSR	0.295163	0.0117708	6	2	4.90326	HU (DAPF)	Bait concentration was adjusted to fit the profile to WT	2022.10.24.
BIN1	O00499	513-593	SH3	P551L	his6-MBP-TEVsite-SH3	SRRM2	Q9UQ35	1464-1478	PxxP_3	\N	PGMKDIPRTPSRGRS	bio ado ado-PGMKDIPRTPSRGRS	0.0319553	0.0130775	6	4	0	HU (DAPF)	Bait concentration was adjusted to fit the profile to WT	2022.10.24.
BIN1	O00499	513-593	SH3	P551L	his6-MBP-TEVsite-SH3	SRRM2	Q9UQ35	1484-1498	PxxP_4	\N	PEPKALPQTPRPRSR	bio ado ado-PEPKALPQTPRPRSR	0.097501	0.013734	6	2	4.27416	HU (DAPF)	Bait concentration was adjusted to fit the profile to WT	2022.10.24.
BIN1	O00499	513-593	SH3	P551L	his6-MBP-TEVsite-SH3	SRRM2	Q9UQ35	1653-1667	PxxP_5	\N	SSTESSPEHPPKSRT	bio ado ado-SSTESSPEHPPKSRT	0.0275174	0.0187157	6	2	0	HU (DAPF)	Bait concentration was adjusted to fit the profile to WT	2022.10.24.
BIN1	O00499	513-593	SH3	P551L	his6-MBP-TEVsite-SH3	SRRM2	Q9UQ35	2029-2043	PxxP_6	\N	RSRSRTPLLPRKRSR	bio ado ado-RSRSRTPLLPRKRSR	0.398325	0.0204368	6	2	5.12501	HU (DAPF)	Bait concentration was adjusted to fit the profile to WT	2022.10.24.
BIN1	O00499	513-593	SH3	P551L	his6-MBP-TEVsite-SH3	SRRM2	Q9UQ35	2405-2419	PxxP_7	\N	ARSRTPPSAPSQSRM	bio ado ado-ARSRTPPSAPSQSRM	0.0406942	0.0285129	6	2	0	HU (DAPF)	Bait concentration was adjusted to fit the profile to WT	2022.10.24.
BIN1	O00499	513-593	SH3	P551L	his6-MBP-TEVsite-SH3	SRRM2	Q9UQ35	2656-2670	PxxP_8	\N	PQALPKPASPKKPPP	bio ado ado-PQALPKPASPKKPPP	0.0161924	0.0308237	6	2	0	HU (DAPF)	Bait concentration was adjusted to fit the profile to WT	2022.10.24.
BIN1	O00499	513-593	SH3	P551L	his6-MBP-TEVsite-SH3	SRRM2	Q9UQ35	400-414	PxxP_9	\N	TRDRSPPKSPEKLPQ	bio ado ado-TRDRSPPKSPEKLPQ	-0.0171491	0.0151395	6	4	0	HU (DAPF)	Bait concentration was adjusted to fit the profile to WT	2022.10.24.
BIN1	O00499	513-593	SH3	P551L	his6-MBP-TEVsite-SH3	SRRM2	Q9UQ35	975-989	PxxP_10	\N	PDTKVKPETPPRQSH	bio ado ado-PDTKVKPETPPRQSH	0.045496	0.00999045	6	4	0	HU (DAPF)	Bait concentration was adjusted to fit the profile to WT	2022.10.24.
BIN1	O00499	513-593	SH3	P551L	his6-MBP-TEVsite-SH3	SUB1	P53999	27-41	PxxP_1	\N	RKKQVAPEKPVKKQK	bio ado ado-RKKQVAPEKPVKKQK	0.0967811	0.0401246	6	2	4.27045	HU (DAPF)	Bait concentration was adjusted to fit the profile to WT	2022.10.24.
BIN1	O00499	513-593	SH3	P551L	his6-MBP-TEVsite-SH3	TTF2	Q9UNY4	401-415	PxxP_1	\N	VSKKVEPSDPVARRV	bio ado ado-VSKKVEPSDPVARRV	-0.0288366	0.0427671	6	2	0	HU (DAPF)	Bait concentration was adjusted to fit the profile to WT	2022.10.24.
BIN1	O00499	513-593	SH3	P551L	his6-MBP-TEVsite-SH3	TUBGCP2	Q9BSJ2	876-890	PxxP_1	\N	RSQKATPQVPVLRGP	bio ado ado-RSQKATPQVPVLRGP	0.0355471	0.0111836	6	2	0	HU (DAPF)	Bait concentration was adjusted to fit the profile to WT	2022.10.24.
BIN1	O00499	513-593	SH3	P551L	his6-MBP-TEVsite-SH3	ZC3H14	Q6PJT7	329-343	PxxP_1	\N	SSSVSVPAKPERRPS	bio ado ado-SSSVSVPAKPERRPS	0.040308	0.0143377	6	2	0	HU (DAPF)	Bait concentration was adjusted to fit the profile to WT	2022.10.24.
BIN1	O00499	513-593	SH3	R581C	his6-MBP-TEVsite-SH3	ACAP1	Q15027	534-548	PxxP_1	\N	GRPRGQPPVPPKPSI	bio ado ado-GRPRGQPPVPPKPSI	0.0301519	0.0150616	6	4	0	HU (DAPF)	Bait concentration was adjusted to fit the profile to WT	2022.10.24.
BIN1	O00499	513-593	SH3	R581C	his6-MBP-TEVsite-SH3	ACAP1	Q15027	553-567	PxxP_2	\N	GSLRSKPEPPSEDLG	bio ado ado-GSLRSKPEPPSEDLG	-0.00958188	0.0393073	6	2	0	HU (DAPF)	Bait concentration was adjusted to fit the profile to WT	2022.10.24.
BIN1	O00499	513-593	SH3	R581C	his6-MBP-TEVsite-SH3	ARHGAP17	Q68EM7	632-646	PxxP_1	\N	AVKKPAPAPPKPGNP	bio ado ado-AVKKPAPAPPKPGNP	0.00531015	0.00981239	6	2	0	HU (DAPF)	Bait concentration was adjusted to fit the profile to WT	2022.10.24.
BIN1	O00499	513-593	SH3	R581C	his6-MBP-TEVsite-SH3	ARHGAP17	Q68EM7	662-676	PxxP_2	\N	HPPSLSPKPPTRSPS	bio ado ado-HPPSLSPKPPTRSPS	0.0356028	0.00349385	6	2	0	HU (DAPF)	Bait concentration was adjusted to fit the profile to WT	2022.10.24.
BIN1	O00499	513-593	SH3	R581C	his6-MBP-TEVsite-SH3	ARHGAP17	Q68EM7	765-779	PxxP_3	\N	PLGKQNPSLPAPQTL	bio ado ado-PLGKQNPSLPAPQTL	0.0194301	0.016221	6	2	0	HU (DAPF)	Bait concentration was adjusted to fit the profile to WT	2022.10.24.
BIN1	O00499	513-593	SH3	R581C	his6-MBP-TEVsite-SH3	ARHGAP17	Q68EM7	801-815	PxxP_4	\N	PKPRNRPSVPPPPQP	bio ado ado-PKPRNRPSVPPPPQP	0.00791357	0.0227742	6	2	0	HU (DAPF)	Bait concentration was adjusted to fit the profile to WT	2022.10.24.
BIN1	O00499	513-593	SH3	R581C	his6-MBP-TEVsite-SH3	ARHGAP45	Q92619	1106-1120	PxxP_1	\N	NNVLQAPLPPMRLRG	bio ado ado-NNVLQAPLPPMRLRG	0.24444	0.0339843	6	2	4.78038	HU (DAPF)	Bait concentration was adjusted to fit the profile to WT	2022.10.24.
BIN1	O00499	513-593	SH3	R581C	his6-MBP-TEVsite-SH3	ARHGAP45	Q92619	681-695	PxxP_2	\N	ELPVAVPSGPFRHEG	bio ado ado-ELPVAVPSGPFRHEG	-0.0138995	0.0219303	6	2	0	HU (DAPF)	Bait concentration was adjusted to fit the profile to WT	2022.10.24.
BIN1	O00499	513-593	SH3	R581C	his6-MBP-TEVsite-SH3	BUD13	Q9BRD0	194-208	PxxP_1	\N	RHDSPDPSPPRRPQH	bio ado ado-RHDSPDPSPPRRPQH	0.0105596	0.0316394	6	2	0	HU (DAPF)	Bait concentration was adjusted to fit the profile to WT	2022.10.24.
BIN1	O00499	513-593	SH3	R581C	his6-MBP-TEVsite-SH3	BUD13	Q9BRD0	219-233	PxxP_2	\N	RHDSPDPSPPRRARH	bio ado ado-RHDSPDPSPPRRARH	0.194025	0.0131262	6	2	4.64153	HU (DAPF)	Bait concentration was adjusted to fit the profile to WT	2022.10.24.
BIN1	O00499	513-593	SH3	R581C	his6-MBP-TEVsite-SH3	C1orf122	Q6ZSJ8	25-39	PxxP_1	\N	GLGGRPPPQPPREER	bio ado ado-GLGGRPPPQPPREER	-0.0036777	0.0326824	6	2	0	HU (DAPF)	Bait concentration was adjusted to fit the profile to WT	2022.10.24.
BIN1	O00499	513-593	SH3	R581C	his6-MBP-TEVsite-SH3	C1orf122	Q6ZSJ8	26-40	PxxP_2	\N	LGGRPPPQPPREERA	bio ado ado-LGGRPPPQPPREERA	0.00353584	0.0384976	6	2	0	HU (DAPF)	Bait concentration was adjusted to fit the profile to WT	2022.10.24.
BIN1	O00499	513-593	SH3	R581C	his6-MBP-TEVsite-SH3	CBL	P22681	488-502	PxxP_1	\N	APQASLPPVPPRLDL	bio ado ado-APQASLPPVPPRLDL	0.0179806	0.0376165	6	2	0	HU (DAPF)	Bait concentration was adjusted to fit the profile to WT	2022.10.24.
BIN1	O00499	513-593	SH3	R581C	his6-MBP-TEVsite-SH3	CBL	P22681	528-542	PxxP_2	\N	HKDKPLPVPPTLRDL	bio ado ado-HKDKPLPVPPTLRDL	0.00440496	0.00680366	6	2	0	HU (DAPF)	Bait concentration was adjusted to fit the profile to WT	2022.10.24.
BIN1	O00499	513-593	SH3	R581C	his6-MBP-TEVsite-SH3	CBL	P22681	537-551	PxxP_3	\N	PTLRDLPPPPPPDRP	bio ado ado-PTLRDLPPPPPPDRP	0.0194875	0.029906	6	2	0	HU (DAPF)	Bait concentration was adjusted to fit the profile to WT	2022.10.24.
BIN1	O00499	513-593	SH3	R581C	his6-MBP-TEVsite-SH3	CBL	P22681	539-553	PxxP_4	\N	LRDLPPPPPPDRPYS	bio ado ado-LRDLPPPPPPDRPYS	0.00522407	0.0444359	6	2	0	HU (DAPF)	Bait concentration was adjusted to fit the profile to WT	2022.10.24.
BIN1	O00499	513-593	SH3	R581C	his6-MBP-TEVsite-SH3	CBL	P22681	560-574	PxxP_5	\N	PQRRPLPCTPGDCPS	bio ado ado-PQRRPLPCTPGDCPS	0.00481726	0.0569618	6	2	0	HU (DAPF)	Bait concentration was adjusted to fit the profile to WT	2022.10.24.
BIN1	O00499	513-593	SH3	R581C	his6-MBP-TEVsite-SH3	CBL	P22681	590-604	PxxP_6	\N	WLPRPIPKVPVSAPS	bio ado ado-WLPRPIPKVPVSAPS	-0.00405461	0.0199893	6	2	0	HU (DAPF)	Bait concentration was adjusted to fit the profile to WT	2022.10.24.
BIN1	O00499	513-593	SH3	R581C	his6-MBP-TEVsite-SH3	CBL	P22681	814-828	PxxP_7	\N	TEGSQVPERPPKPFP	bio ado ado-TEGSQVPERPPKPFP	0.00782259	0.0163216	6	2	0	HU (DAPF)	Bait concentration was adjusted to fit the profile to WT	2022.10.24.
BIN1	O00499	513-593	SH3	R581C	his6-MBP-TEVsite-SH3	CDC27	P30260	396-410	PxxP_1	\N	LKMKFPPKIPNRKTK	bio ado ado-LKMKFPPKIPNRKTK	0.5432	0.0183968	6	4	5.41364	HU (DAPF)	Bait concentration was adjusted to fit the profile to WT	2022.10.24.
BIN1	O00499	513-593	SH3	R581C	his6-MBP-TEVsite-SH3	DDX42	Q86XP3	183-197	PxxP_1	\N	YDSDGNPIAPTKKII	bio ado ado-YDSDGNPIAPTKKII	0.000334267	0.0601827	6	2	0	HU (DAPF)	Bait concentration was adjusted to fit the profile to WT	2022.10.24.
BIN1	O00499	513-593	SH3	R581C	his6-MBP-TEVsite-SH3	DDX42	Q86XP3	23-37	PxxP_2	\N	AGKKEEPKLPQQSHS	bio ado ado-AGKKEEPKLPQQSHS	-0.00235056	0.0408179	6	2	0	HU (DAPF)	Bait concentration was adjusted to fit the profile to WT	2022.10.24.
BIN1	O00499	513-593	SH3	R581C	his6-MBP-TEVsite-SH3	DDX42	Q86XP3	920-934	PxxP_3	\N	ADGFAVPEPPKRKKS	bio ado ado-ADGFAVPEPPKRKKS	0.356867	0.000283494	6	2	5.03901	HU (DAPF)	Bait concentration was adjusted to fit the profile to WT	2022.10.24.
BIN1	O00499	513-593	SH3	R581C	his6-MBP-TEVsite-SH3	DMBT1	Q9UGM3	215-229	PxxP_1	\N	WPVRISPPVPTEGSE	bio ado ado-WPVRISPPVPTEGSE	-0.023914	0.0585048	6	2	0	HU (DAPF)	Bait concentration was adjusted to fit the profile to WT	2022.10.24.
BIN1	O00499	513-593	SH3	R581C	his6-MBP-TEVsite-SH3	DNM2	P50570	313-327	PxxP_1	\N	EYKNFRPDDPTRKTK	bio ado ado-EYKNFRPDDPTRKTK	0.00417804	0.0153736	6	2	0	HU (DAPF)	Bait concentration was adjusted to fit the profile to WT	2022.10.24.
BIN1	O00499	513-593	SH3	R581C	his6-MBP-TEVsite-SH3	DNM2	P50570	801-815	PxxP_2	\N	AASFSAPPIPSRPGP	bio ado ado-AASFSAPPIPSRPGP	-0.0578159	0.112135	6	2	0	HU (DAPF)	Bait concentration was adjusted to fit the profile to WT	2022.10.24.
BIN1	O00499	513-593	SH3	R581C	his6-MBP-TEVsite-SH3	DNM2	P50570	823-837	PxxP_3	\N	DLFPAPPQIPSRPVR	bio ado ado-DLFPAPPQIPSRPVR	0.0719547	0.0556808	6	2	4.1251	HU (DAPF)	Bait concentration was adjusted to fit the profile to WT	2022.10.24.
BIN1	O00499	513-593	SH3	R581C	his6-MBP-TEVsite-SH3	DNM2	P50570	826-840	PxxP_4	\N	PAPPQIPSRPVRIPP	bio ado ado-PAPPQIPSRPVRIPP	0.02976	0.00639066	6	2	0	HU (DAPF)	Bait concentration was adjusted to fit the profile to WT	2022.10.24.
BIN1	O00499	513-593	SH3	R581C	his6-MBP-TEVsite-SH3	DNM2	P50570	834-848	PxxP_5	\N	RPVRIPPGIPPGVPS	bio ado ado-RPVRIPPGIPPGVPS	0.0312374	0.00730519	6	2	0	HU (DAPF)	Bait concentration was adjusted to fit the profile to WT	2022.10.24.
BIN1	O00499	513-593	SH3	R581C	his6-MBP-TEVsite-SH3	DNM2	P50570	838-852	PxxP_6	\N	IPPGIPPGVPSRRPP	bio ado ado-IPPGIPPGVPSRRPP	0.0275501	0.00654916	6	2	0	HU (DAPF)	Bait concentration was adjusted to fit the profile to WT	2022.10.24.
BIN1	O00499	513-593	SH3	R581C	his6-MBP-TEVsite-SH3	DNM2	P50570	846-860	PxxP_7	\N	VPSRRPPAAPSRPTI	bio ado ado-VPSRRPPAAPSRPTI	0.00581346	0.0533555	6	4	0	HU (DAPF)	Bait concentration was adjusted to fit the profile to WT	2022.10.24.
BIN1	O00499	513-593	SH3	R581C	his6-MBP-TEVsite-SH3	DNMT1	P26358	129-143	PxxP_1	\N	PKPLSKPRTPRRSKS	bio ado ado-PKPLSKPRTPRRSKS	0.29869	0.00861064	6	2	4.91136	HU (DAPF)	Bait concentration was adjusted to fit the profile to WT	2022.10.24.
BIN1	O00499	513-593	SH3	R581C	his6-MBP-TEVsite-SH3	DNMT1	P26358	323-337	PxxP_2	\N	KRRKTTPKEPTEKKM	bio ado ado-KRRKTTPKEPTEKKM	0.024653	0.0171541	6	2	0	HU (DAPF)	Bait concentration was adjusted to fit the profile to WT	2022.10.24.
BIN1	O00499	513-593	SH3	R581C	his6-MBP-TEVsite-SH3	EZH2	Q15910	341-355	PxxP_1	\N	ERIKTPPKRPGGRRR	bio ado ado-ERIKTPPKRPGGRRR	0.189151	0.0406241	6	2	4.62686	HU (DAPF)	Bait concentration was adjusted to fit the profile to WT	2022.10.24.
BIN1	O00499	513-593	SH3	R581C	his6-MBP-TEVsite-SH3	G3BP1	Q13283	288-302	PxxP_1	\N	PESQIPPQRPQRDQR	bio ado ado-PESQIPPQRPQRDQR	0.0439876	0.0308141	6	2	0	HU (DAPF)	Bait concentration was adjusted to fit the profile to WT	2022.10.24.
BIN1	O00499	513-593	SH3	R581C	his6-MBP-TEVsite-SH3	HDGFL2	Q7Z4V5	288-302	PxxP_1	\N	RGRKPKPERPPSSSS	bio ado ado-RGRKPKPERPPSSSS	0.0298815	0.028971	6	2	0	HU (DAPF)	Bait concentration was adjusted to fit the profile to WT	2022.10.24.
BIN1	O00499	513-593	SH3	R581C	his6-MBP-TEVsite-SH3	HIRIP3	Q9BW71	531-545	PxxP_1	\N	DEERPRPAPPDWSHM	bio ado ado-DEERPRPAPPDWSHM	0.0271768	0.0186387	6	2	0	HU (DAPF)	Bait concentration was adjusted to fit the profile to WT	2022.10.24.
BIN1	O00499	513-593	SH3	R581C	his6-MBP-TEVsite-SH3	HMGA1	P17096	28-42	PxxP_1	\N	RPRKQPPVSPGTALV	bio ado ado-RPRKQPPVSPGTALV	0.0481754	0.0468608	6	2	0	HU (DAPF)	Bait concentration was adjusted to fit the profile to WT	2022.10.24.
BIN1	O00499	513-593	SH3	R581C	his6-MBP-TEVsite-SH3	HNRNPK	P61978	266-280	PxxP_1	\N	PGRGGRPMPPSRRDY	bio ado ado-PGRGGRPMPPSRRDY	0.182203	0.00102643	6	2	4.60548	HU (DAPF)	Bait concentration was adjusted to fit the profile to WT	2022.10.24.
BIN1	O00499	513-593	SH3	R581C	his6-MBP-TEVsite-SH3	HNRNPK	P61978	283-297	PxxP_2	\N	MSPRRGPPPPPPGRG	bio ado ado-MSPRRGPPPPPPGRG	0.0872024	0.0121059	6	2	4.21873	HU (DAPF)	Bait concentration was adjusted to fit the profile to WT	2022.10.24.
BIN1	O00499	513-593	SH3	R581C	his6-MBP-TEVsite-SH3	HNRNPK	P61978	284-298	PxxP_3	\N	SPRRGPPPPPPGRGG	bio ado ado-SPRRGPPPPPPGRGG	0.116083	0.016685	6	2	4.36262	HU (DAPF)	Bait concentration was adjusted to fit the profile to WT	2022.10.24.
BIN1	O00499	513-593	SH3	R581C	his6-MBP-TEVsite-SH3	HNRNPK	P61978	285-299	PxxP_4	\N	PRRGPPPPPPGRGGR	bio ado ado-PRRGPPPPPPGRGGR	0.177787	0.00969436	6	2	4.59158	HU (DAPF)	Bait concentration was adjusted to fit the profile to WT	2022.10.24.
BIN1	O00499	513-593	SH3	R581C	his6-MBP-TEVsite-SH3	HNRNPK	P61978	302-316	PxxP_5	\N	SRARNLPLPPPPPPR	bio ado ado-SRARNLPLPPPPPPR	0.159046	0.0105163	6	2	4.52961	HU (DAPF)	Bait concentration was adjusted to fit the profile to WT	2022.10.24.
BIN1	O00499	513-593	SH3	R581C	his6-MBP-TEVsite-SH3	HNRNPK	P61978	305-319	PxxP_6	\N	RNLPLPPPPPPRGGD	bio ado ado-RNLPLPPPPPPRGGD	0.0257715	0.0553007	6	2	0	HU (DAPF)	Bait concentration was adjusted to fit the profile to WT	2022.10.24.
BIN1	O00499	513-593	SH3	R581C	his6-MBP-TEVsite-SH3	IRF2BP1	Q8IU81	361-375	PxxP_1	\N	ALCGPPPRAPSRNLA	bio ado ado-ALCGPPPRAPSRNLA	0.0889041	0.00528873	6	2	4.22827	HU (DAPF)	Bait concentration was adjusted to fit the profile to WT	2022.10.24.
BIN1	O00499	513-593	SH3	R581C	his6-MBP-TEVsite-SH3	KHDRBS1	Q07666	32-46	PxxP_1	\N	QTPSRQPPLPHRSRG	bio ado ado-QTPSRQPPLPHRSRG	0.0705908	0.0497897	6	2	4.11588	HU (DAPF)	Bait concentration was adjusted to fit the profile to WT	2022.10.24.
BIN1	O00499	513-593	SH3	R581C	his6-MBP-TEVsite-SH3	KHDRBS1	Q07666	328-342	PxxP_2	\N	TVTRGVPPPPTVRGA	bio ado ado-TVTRGVPPPPTVRGA	0.0276694	0.0304925	6	2	0	HU (DAPF)	Bait concentration was adjusted to fit the profile to WT	2022.10.24.
BIN1	O00499	513-593	SH3	R581C	his6-MBP-TEVsite-SH3	KHDRBS1	Q07666	421-435	PxxP_3	\N	PSLKAPPARPVKGAY	bio ado ado-PSLKAPPARPVKGAY	0.0160671	0.0442913	6	4	0	HU (DAPF)	Bait concentration was adjusted to fit the profile to WT	2022.10.24.
BIN1	O00499	513-593	SH3	R581C	his6-MBP-TEVsite-SH3	MKI67	P46013	1083-1097	PxxP_1	\N	TGMKKWPRTPKEEAQ	bio ado ado-TGMKKWPRTPKEEAQ	0.0207735	0.0127767	6	2	0	HU (DAPF)	Bait concentration was adjusted to fit the profile to WT	2022.10.24.
BIN1	O00499	513-593	SH3	R581C	his6-MBP-TEVsite-SH3	MKI67	P46013	1327-1341	PxxP_2	\N	TGSKRRPQTPKEEAQ	bio ado ado-TGSKRRPQTPKEEAQ	-0.0176951	0.0250938	6	2	0	HU (DAPF)	Bait concentration was adjusted to fit the profile to WT	2022.10.24.
BIN1	O00499	513-593	SH3	R581C	his6-MBP-TEVsite-SH3	MKI67	P46013	1385-1399	PxxP_3	\N	TSTRRQPKTPLEKRD	bio ado ado-TSTRRQPKTPLEKRD	0.0473689	0.00796659	6	2	0	HU (DAPF)	Bait concentration was adjusted to fit the profile to WT	2022.10.24.
BIN1	O00499	513-593	SH3	R581C	his6-MBP-TEVsite-SH3	MKI67	P46013	1935-1949	PxxP_4	\N	PGSKRRPQTPKEKAK	bio ado ado-PGSKRRPQTPKEKAK	0.0348991	0.0209557	6	2	0	HU (DAPF)	Bait concentration was adjusted to fit the profile to WT	2022.10.24.
BIN1	O00499	513-593	SH3	R581C	his6-MBP-TEVsite-SH3	MKI67	P46013	2115-2129	PxxP_5	\N	TSTRRRPKTPLGKRD	bio ado ado-TSTRRRPKTPLGKRD	0.0703141	0.016534	6	2	4.11399	HU (DAPF)	Bait concentration was adjusted to fit the profile to WT	2022.10.24.
BIN1	O00499	513-593	SH3	R581C	his6-MBP-TEVsite-SH3	MKI67	P46013	2175-2189	PxxP_6	\N	TGSKRQPRTPKGKAQ	bio ado ado-TGSKRQPRTPKGKAQ	-0.00201847	0.0244751	6	2	0	HU (DAPF)	Bait concentration was adjusted to fit the profile to WT	2022.10.24.
BIN1	O00499	513-593	SH3	R581C	his6-MBP-TEVsite-SH3	MKI67	P46013	2297-2311	PxxP_7	\N	PGSKRWPQTPKEKAQ	bio ado ado-PGSKRWPQTPKEKAQ	-0.00411497	0.015203	6	2	0	HU (DAPF)	Bait concentration was adjusted to fit the profile to WT	2022.10.24.
BIN1	O00499	513-593	SH3	R581C	his6-MBP-TEVsite-SH3	MKI67	P46013	2418-2432	PxxP_8	\N	PGSKRQPQTPKEKAE	bio ado ado-PGSKRQPQTPKEKAE	-0.0076431	0.020903	6	2	0	HU (DAPF)	Bait concentration was adjusted to fit the profile to WT	2022.10.24.
BIN1	O00499	513-593	SH3	R581C	his6-MBP-TEVsite-SH3	MKI67	P46013	2660-2674	PxxP_9	\N	EPSRRRPRAPKEKAQ	bio ado ado-EPSRRRPRAPKEKAQ	0.0670069	0.0310266	6	2	4.09089	HU (DAPF)	Bait concentration was adjusted to fit the profile to WT	2022.10.24.
BIN1	O00499	513-593	SH3	R581C	his6-MBP-TEVsite-SH3	MKI67	P46013	2781-2795	PxxP_10	\N	TGSRRRPRAPRESAQ	bio ado ado-TGSRRRPRAPRESAQ	0.0674822	0.0431753	6	2	4.09427	HU (DAPF)	Bait concentration was adjusted to fit the profile to WT	2022.10.24.
BIN1	O00499	513-593	SH3	R581C	his6-MBP-TEVsite-SH3	MKI67	P46013	2899-2913	PxxP_11	\N	IGSRRQPRAPKEKAQ	bio ado ado-IGSRRQPRAPKEKAQ	0.0330428	0.054577	6	2	0	HU (DAPF)	Bait concentration was adjusted to fit the profile to WT	2022.10.24.
BIN1	O00499	513-593	SH3	R581C	his6-MBP-TEVsite-SH3	MKI67	P46013	2986-3000	PxxP_12	\N	KSNTSLPPLPFKRGG	bio ado ado-KSNTSLPPLPFKRGG	0.050692	0.0162417	6	2	3.95903	HU (DAPF)	Bait concentration was adjusted to fit the profile to WT	2022.10.24.
BIN1	O00499	513-593	SH3	R581C	his6-MBP-TEVsite-SH3	MKI67	P46013	517-531	PxxP_13	\N	FDENLPPNTPLKRGE	bio ado ado-FDENLPPNTPLKRGE	-0.000948255	0.0286456	6	2	0	HU (DAPF)	Bait concentration was adjusted to fit the profile to WT	2022.10.24.
BIN1	O00499	513-593	SH3	R581C	his6-MBP-TEVsite-SH3	MKI67	P46013	686-700	PxxP_14	\N	NKRQRRPATPKKPVG	bio ado ado-NKRQRRPATPKKPVG	0.044392	0.0333348	6	2	0	HU (DAPF)	Bait concentration was adjusted to fit the profile to WT	2022.10.24.
BIN1	O00499	513-593	SH3	R581C	his6-MBP-TEVsite-SH3	MUC5AC	P98088	1311-1325	PxxP_1	\N	IERRVYPCSPTTPVP	bio ado ado-IERRVYPCSPTTPVP	0.00438098	0.025659	6	2	0	HU (DAPF)	Bait concentration was adjusted to fit the profile to WT	2022.10.24.
BIN1	O00499	513-593	SH3	R581C	his6-MBP-TEVsite-SH3	MUC5AC	P98088	1563-1577	PxxP_2	\N	VSSKPTPTEPSTSSC	bio ado ado-VSSKPTPTEPSTSSC	0.0410775	0.0213302	6	2	0	HU (DAPF)	Bait concentration was adjusted to fit the profile to WT	2022.10.24.
BIN1	O00499	513-593	SH3	R581C	his6-MBP-TEVsite-SH3	MUC5AC	P98088	1936-1950	PxxP_3	\N	VSSKPTPTEPSTSSC	bio ado ado-VSSKPTPTEPSTSSC	0.0433942	0.0200448	6	2	0	HU (DAPF)	Bait concentration was adjusted to fit the profile to WT	2022.10.24.
BIN1	O00499	513-593	SH3	R581C	his6-MBP-TEVsite-SH3	MUC5AC	P98088	5643-5657	PxxP_4	\N	SWERGVPVSPMH---	bio ado ado-SWERGVPVSPMH---	0.0588164	0.0926806	6	2	4.02889	HU (DAPF)	Bait concentration was adjusted to fit the profile to WT	2022.10.24.
BIN1	O00499	513-593	SH3	R581C	his6-MBP-TEVsite-SH3	NOLC1	Q14978	193-207	PxxP_1	\N	KAQTKAPPKPARAAP	bio ado ado-KAQTKAPPKPARAAP	0.0175673	0.0293048	6	2	0	HU (DAPF)	Bait concentration was adjusted to fit the profile to WT	2022.10.24.
BIN1	O00499	513-593	SH3	R581C	his6-MBP-TEVsite-SH3	PKN1	Q16512	565-579	PxxP_1	\N	KSSRDPPSSPSSLSS	bio ado ado-KSSRDPPSSPSSLSS	-0.010939	0.0136412	6	2	0	HU (DAPF)	Bait concentration was adjusted to fit the profile to WT	2022.10.24.
BIN1	O00499	513-593	SH3	R581C	his6-MBP-TEVsite-SH3	PPP1R12A	O14974	401-415	PxxP_1	\N	SSGQATPTSPIKKFP	bio ado ado-SSGQATPTSPIKKFP	0.122529	0.112921	6	2	4.39055	HU (DAPF)	Bait concentration was adjusted to fit the profile to WT	2022.10.24.
BIN1	O00499	513-593	SH3	R581C	his6-MBP-TEVsite-SH3	PPP1R12A	O14974	493-507	PxxP_2	\N	RLAYVAPTIPRRLAS	bio ado ado-RLAYVAPTIPRRLAS	0.0851765	0.0250367	6	2	4.20716	HU (DAPF)	Bait concentration was adjusted to fit the profile to WT	2022.10.24.
BIN1	O00499	513-593	SH3	R581C	his6-MBP-TEVsite-SH3	PRRC2A	P48634	1192-1206	PxxP_1	\N	LAPKKPPTGPLPPSK	bio ado ado-LAPKKPPTGPLPPSK	0.00287471	0.0138566	6	2	0	HU (DAPF)	Bait concentration was adjusted to fit the profile to WT	2022.10.24.
BIN1	O00499	513-593	SH3	R581C	his6-MBP-TEVsite-SH3	PRRC2A	P48634	1195-1209	PxxP_2	\N	KKPPTGPLPPSKEPL	bio ado ado-KKPPTGPLPPSKEPL	0.0173935	0.00994847	6	2	0	HU (DAPF)	Bait concentration was adjusted to fit the profile to WT	2022.10.24.
BIN1	O00499	513-593	SH3	R581C	his6-MBP-TEVsite-SH3	PRRC2A	P48634	120-134	PxxP_3	\N	NQPKRPPAAPENTPL	bio ado ado-NQPKRPPAAPENTPL	0.0135541	0.0134542	6	2	0	HU (DAPF)	Bait concentration was adjusted to fit the profile to WT	2022.10.24.
BIN1	O00499	513-593	SH3	R581C	his6-MBP-TEVsite-SH3	PRRC2A	P48634	1495-1509	PxxP_4	\N	GHPRHKPGLPQAPQG	bio ado ado-GHPRHKPGLPQAPQG	0.00772176	0.053625	6	2	0	HU (DAPF)	Bait concentration was adjusted to fit the profile to WT	2022.10.24.
BIN1	O00499	513-593	SH3	R581C	his6-MBP-TEVsite-SH3	PRRC2A	P48634	1506-1520	PxxP_5	\N	APQGPSPRPPTRYEP	bio ado ado-APQGPSPRPPTRYEP	-0.00185942	0.00427298	6	2	0	HU (DAPF)	Bait concentration was adjusted to fit the profile to WT	2022.10.24.
BIN1	O00499	513-593	SH3	R581C	his6-MBP-TEVsite-SH3	PRRC2A	P48634	1549-1563	PxxP_6	\N	DSAGVSPFPPKRRER	bio ado ado-DSAGVSPFPPKRRER	0.311746	0.0251072	6	2	4.94093	HU (DAPF)	Bait concentration was adjusted to fit the profile to WT	2022.10.24.
BIN1	O00499	513-593	SH3	R581C	his6-MBP-TEVsite-SH3	PRRC2A	P48634	1705-1719	PxxP_7	\N	EPPRRPPPAPHDGDR	bio ado ado-EPPRRPPPAPHDGDR	0.00385823	0.0349268	6	2	0	HU (DAPF)	Bait concentration was adjusted to fit the profile to WT	2022.10.24.
BIN1	O00499	513-593	SH3	R581C	his6-MBP-TEVsite-SH3	PRRC2A	P48634	1721-1735	PxxP_8	\N	ELPREQPLPPGPIGT	bio ado ado-ELPREQPLPPGPIGT	0.00688076	0.0283418	6	2	0	HU (DAPF)	Bait concentration was adjusted to fit the profile to WT	2022.10.24.
BIN1	O00499	513-593	SH3	R581C	his6-MBP-TEVsite-SH3	PRRC2A	P48634	261-275	PxxP_9	\N	FPPPYGPQGPYRYPT	bio ado ado-FPPPYGPQGPYRYPT	0.00685361	0.00608922	6	2	0	HU (DAPF)	Bait concentration was adjusted to fit the profile to WT	2022.10.24.
BIN1	O00499	513-593	SH3	R581C	his6-MBP-TEVsite-SH3	PRRC2A	P48634	270-284	PxxP_10	\N	PYRYPTPDGPSRFPR	bio ado ado-PYRYPTPDGPSRFPR	0.0309247	0.0237114	6	2	0	HU (DAPF)	Bait concentration was adjusted to fit the profile to WT	2022.10.24.
BIN1	O00499	513-593	SH3	R581C	his6-MBP-TEVsite-SH3	PRRC2A	P48634	502-516	PxxP_11	\N	KRLKAEPAAPPAAPS	bio ado ado-KRLKAEPAAPPAAPS	-0.023766	0.0406057	6	2	0	HU (DAPF)	Bait concentration was adjusted to fit the profile to WT	2022.10.24.
BIN1	O00499	513-593	SH3	R581C	his6-MBP-TEVsite-SH3	PRRC2A	P48634	523-537	PxxP_12	\N	AVPKELPAPPAPPPA	bio ado ado-AVPKELPAPPAPPPA	0.0223283	0.00284994	6	2	0	HU (DAPF)	Bait concentration was adjusted to fit the profile to WT	2022.10.24.
BIN1	O00499	513-593	SH3	R581C	his6-MBP-TEVsite-SH3	PRRC2A	P48634	585-599	PxxP_13	\N	EASPVEPQLPSKEGP	bio ado ado-EASPVEPQLPSKEGP	0.00879948	0.00120085	6	2	0	HU (DAPF)	Bait concentration was adjusted to fit the profile to WT	2022.10.24.
BIN1	O00499	513-593	SH3	R581C	his6-MBP-TEVsite-SH3	PRRC2A	P48634	593-607	PxxP_14	\N	LPSKEGPEPPEEVPP	bio ado ado-LPSKEGPEPPEEVPP	-0.0143854	0.0200052	6	2	0	HU (DAPF)	Bait concentration was adjusted to fit the profile to WT	2022.10.24.
BIN1	O00499	513-593	SH3	R581C	his6-MBP-TEVsite-SH3	PRRC2A	P48634	690-704	PxxP_15	\N	VPAPQAPPPPPKALY	bio ado ado-VPAPQAPPPPPKALY	0.00895492	0.0235662	6	2	0	HU (DAPF)	Bait concentration was adjusted to fit the profile to WT	2022.10.24.
BIN1	O00499	513-593	SH3	R581C	his6-MBP-TEVsite-SH3	PRRC2A	P48634	707-721	PxxP_16	\N	ALGRPPPMPPMNFDP	bio ado ado-ALGRPPPMPPMNFDP	-0.00735028	0.0289781	6	2	0	HU (DAPF)	Bait concentration was adjusted to fit the profile to WT	2022.10.24.
BIN1	O00499	513-593	SH3	R581C	his6-MBP-TEVsite-SH3	PRRC2A	P48634	859-873	PxxP_17	\N	PGPRPLPWPPGSDEV	bio ado ado-PGPRPLPWPPGSDEV	-0.00526003	0.0287893	6	2	0	HU (DAPF)	Bait concentration was adjusted to fit the profile to WT	2022.10.24.
BIN1	O00499	513-593	SH3	R581C	his6-MBP-TEVsite-SH3	PRRC2A	P48634	907-921	PxxP_18	\N	GSGGQGPPPPRRESR	bio ado ado-GSGGQGPPPPRRESR	0.0652627	0.0306797	6	2	4.07828	HU (DAPF)	Bait concentration was adjusted to fit the profile to WT	2022.10.24.
BIN1	O00499	513-593	SH3	R581C	his6-MBP-TEVsite-SH3	PRRC2A	P48634	936-950	PxxP_19	\N	GIPPEEPGAPPRRAG	bio ado ado-GIPPEEPGAPPRRAG	0.0475182	0.0304792	6	2	0	HU (DAPF)	Bait concentration was adjusted to fit the profile to WT	2022.10.24.
BIN1	O00499	513-593	SH3	R581C	his6-MBP-TEVsite-SH3	PRRC2A	P48634	949-963	PxxP_20	\N	AGPIKKPPPPTKVEE	bio ado ado-AGPIKKPPPPTKVEE	-0.00542115	0.0278804	6	2	0	HU (DAPF)	Bait concentration was adjusted to fit the profile to WT	2022.10.24.
BIN1	O00499	513-593	SH3	R581C	his6-MBP-TEVsite-SH3	PRRC2C	Q9Y520	1053-1067	PxxP_1	\N	TEKKDLPPPPPPPQP	bio ado ado-TEKKDLPPPPPPPQP	0.0124326	0.0351582	6	2	0	HU (DAPF)	Bait concentration was adjusted to fit the profile to WT	2022.10.24.
BIN1	O00499	513-593	SH3	R581C	his6-MBP-TEVsite-SH3	PRRC2C	Q9Y520	1226-1240	PxxP_2	\N	PRAEHIPSGPLRQRE	bio ado ado-PRAEHIPSGPLRQRE	0.0155879	0.0335978	6	2	0	HU (DAPF)	Bait concentration was adjusted to fit the profile to WT	2022.10.24.
BIN1	O00499	513-593	SH3	R581C	his6-MBP-TEVsite-SH3	PRRC2C	Q9Y520	1419-1433	PxxP_3	\N	RPRRQRPTRPPRQDK	bio ado ado-RPRRQRPTRPPRQDK	0.455874	0.0153115	6	4	5.24057	HU (DAPF)	Bait concentration was adjusted to fit the profile to WT	2022.10.24.
BIN1	O00499	513-593	SH3	R581C	his6-MBP-TEVsite-SH3	PRRC2C	Q9Y520	1630-1644	PxxP_4	\N	EDPKPGPKKPKEKVD	bio ado ado-EDPKPGPKKPKEKVD	-0.0108173	0.0615488	6	2	0	HU (DAPF)	Bait concentration was adjusted to fit the profile to WT	2022.10.24.
BIN1	O00499	513-593	SH3	R581C	his6-MBP-TEVsite-SH3	PRRC2C	Q9Y520	2005-2019	PxxP_5	\N	ISKKLGPISPPQPPS	bio ado ado-ISKKLGPISPPQPPS	-0.0132654	0.00539824	6	2	0	HU (DAPF)	Bait concentration was adjusted to fit the profile to WT	2022.10.24.
BIN1	O00499	513-593	SH3	R581C	his6-MBP-TEVsite-SH3	PRRC2C	Q9Y520	2877-2891	PxxP_6	\N	KPVRTGPIKPQAIKT	bio ado ado-KPVRTGPIKPQAIKT	0.0162602	0.0228234	6	2	0	HU (DAPF)	Bait concentration was adjusted to fit the profile to WT	2022.10.24.
BIN1	O00499	513-593	SH3	R581C	his6-MBP-TEVsite-SH3	PRRC2C	Q9Y520	596-610	PxxP_7	\N	LEEKIEPREPNLEPM	bio ado ado-LEEKIEPREPNLEPM	-0.00322464	0.017558	6	2	0	HU (DAPF)	Bait concentration was adjusted to fit the profile to WT	2022.10.24.
BIN1	O00499	513-593	SH3	R581C	his6-MBP-TEVsite-SH3	PRRC2C	Q9Y520	704-718	PxxP_8	\N	PSSSTVPPPPHRPLY	bio ado ado-PSSSTVPPPPHRPLY	0.0240879	0.00131342	6	2	0	HU (DAPF)	Bait concentration was adjusted to fit the profile to WT	2022.10.24.
BIN1	O00499	513-593	SH3	R581C	his6-MBP-TEVsite-SH3	RB1	P06400	244-258	PxxP_1	\N	IPINGSPRTPRRGQN	bio ado ado-IPINGSPRTPRRGQN	0.0583888	0.0536778	6	2	4.02544	HU (DAPF)	Bait concentration was adjusted to fit the profile to WT	2022.10.24.
BIN1	O00499	513-593	SH3	R581C	his6-MBP-TEVsite-SH3	RB1	P06400	365-379	PxxP_2	\N	EVNVIPPHTPVRTVM	bio ado ado-EVNVIPPHTPVRTVM	-0.0125835	0.0291675	6	2	0	HU (DAPF)	Bait concentration was adjusted to fit the profile to WT	2022.10.24.
BIN1	O00499	513-593	SH3	R581C	his6-MBP-TEVsite-SH3	RB1	P06400	780-794	PxxP_3	\N	SPIPHIPRSPYKFPS	bio ado ado-SPIPHIPRSPYKFPS	0.0244925	0.0201948	6	2	0	HU (DAPF)	Bait concentration was adjusted to fit the profile to WT	2022.10.24.
BIN1	O00499	513-593	SH3	R581C	his6-MBP-TEVsite-SH3	RB1	P06400	787-801	PxxP_4	\N	RSPYKFPSSPLRIPG	bio ado ado-RSPYKFPSSPLRIPG	0.00170601	0.00310698	6	2	0	HU (DAPF)	Bait concentration was adjusted to fit the profile to WT	2022.10.24.
BIN1	O00499	513-593	SH3	R581C	his6-MBP-TEVsite-SH3	RB1	P06400	862-876	PxxP_5	\N	SAEGSNPPKPLKKLR	bio ado ado-SAEGSNPPKPLKKLR	0.0418685	0.0303925	6	2	0	HU (DAPF)	Bait concentration was adjusted to fit the profile to WT	2022.10.24.
BIN1	O00499	513-593	SH3	R581C	his6-MBP-TEVsite-SH3	SH3KBP1	Q96B97	360-374	PxxP_1	\N	EIKKIPPERPEMLPN	bio ado ado-EIKKIPPERPEMLPN	0.0106182	0.0187656	6	2	0	HU (DAPF)	Bait concentration was adjusted to fit the profile to WT	2022.10.24.
BIN1	O00499	513-593	SH3	R581C	his6-MBP-TEVsite-SH3	SH3KBP1	Q96B97	390-404	PxxP_2	\N	LQKPSVPAIPPKKPR	bio ado ado-LQKPSVPAIPPKKPR	0.14285	0.0274337	6	2	4.47142	HU (DAPF)	Bait concentration was adjusted to fit the profile to WT	2022.10.24.
BIN1	O00499	513-593	SH3	R581C	his6-MBP-TEVsite-SH3	SH3KBP1	Q96B97	413-427	PxxP_3	\N	RPGALPPRRPERPVG	bio ado ado-RPGALPPRRPERPVG	0.0397655	0.013506	6	2	0	HU (DAPF)	Bait concentration was adjusted to fit the profile to WT	2022.10.24.
BIN1	O00499	513-593	SH3	R581C	his6-MBP-TEVsite-SH3	SMCHD1	A6NHR9	1139-1153	PxxP_1	\N	FTVRPLPDEPKHLKC	bio ado ado-FTVRPLPDEPKHLKC	-0.0186911	0.0289125	6	2	0	HU (DAPF)	Bait concentration was adjusted to fit the profile to WT	2022.10.24.
BIN1	O00499	513-593	SH3	R581C	his6-MBP-TEVsite-SH3	SMCHD1	A6NHR9	1977-1991	PxxP_2	\N	VETTDCPVPPKRMRR	bio ado ado-VETTDCPVPPKRMRR	0.678086	0.00728024	6	2	5.69649	HU (DAPF)	Bait concentration was adjusted to fit the profile to WT	2022.10.24.
BIN1	O00499	513-593	SH3	R581C	his6-MBP-TEVsite-SH3	SMCHD1	A6NHR9	437-451	PxxP_3	\N	ETYPDDPCFPSKLKD	bio ado ado-ETYPDDPCFPSKLKD	0.0155051	0.0175139	6	2	0	HU (DAPF)	Bait concentration was adjusted to fit the profile to WT	2022.10.24.
BIN1	O00499	513-593	SH3	R581C	his6-MBP-TEVsite-SH3	SRRM1	Q8IYB3	327-341	PxxP_1	\N	TPPRRMPPPPRHRRS	bio ado ado-TPPRRMPPPPRHRRS	0.32337	0.0308821	6	2	4.96676	HU (DAPF)	Bait concentration was adjusted to fit the profile to WT	2022.10.24.
BIN1	O00499	513-593	SH3	R581C	his6-MBP-TEVsite-SH3	SRRM1	Q8IYB3	365-379	PxxP_2	\N	SRSRSPPKKPPKRTS	bio ado ado-SRSRSPPKKPPKRTS	0.217959	0.0462448	6	4	4.71008	HU (DAPF)	Bait concentration was adjusted to fit the profile to WT	2022.10.24.
BIN1	O00499	513-593	SH3	R581C	his6-MBP-TEVsite-SH3	SRRM1	Q8IYB3	395-409	PxxP_3	\N	PRRRHRPSPPATPPP	bio ado ado-PRRRHRPSPPATPPP	0.208071	0.0239096	6	2	4.68241	HU (DAPF)	Bait concentration was adjusted to fit the profile to WT	2022.10.24.
BIN1	O00499	513-593	SH3	R581C	his6-MBP-TEVsite-SH3	SRRM1	Q8IYB3	544-558	PxxP_4	\N	GRRRRSPSPPPTRRR	bio ado ado-GRRRRSPSPPPTRRR	0.522129	0.0322234	6	2	5.37172	HU (DAPF)	Bait concentration was adjusted to fit the profile to WT	2022.10.24.
BIN1	O00499	513-593	SH3	R581C	his6-MBP-TEVsite-SH3	SRRM1	Q8IYB3	557-571	PxxP_5	\N	RRRSPSPAPPPRRRR	bio ado ado-RRRSPSPAPPPRRRR	0.789828	0.00852394	6	2	5.97875	HU (DAPF)	Bait concentration was adjusted to fit the profile to WT	2022.10.24.
BIN1	O00499	513-593	SH3	R581C	his6-MBP-TEVsite-SH3	SRRM1	Q8IYB3	567-581	PxxP_6	\N	PRRRRTPTPPPRRRT	bio ado ado-PRRRRTPTPPPRRRT	0.790667	0.00526857	6	4	5.98119	HU (DAPF)	Bait concentration was adjusted to fit the profile to WT	2022.10.24.
BIN1	O00499	513-593	SH3	R581C	his6-MBP-TEVsite-SH3	SRRM1	Q8IYB3	576-590	PxxP_7	\N	PPRRRTPSPPPRRRS	bio ado ado-PPRRRTPSPPPRRRS	0.749844	0.00651137	6	4	5.86926	HU (DAPF)	Bait concentration was adjusted to fit the profile to WT	2022.10.24.
BIN1	O00499	513-593	SH3	R581C	his6-MBP-TEVsite-SH3	SRRM1	Q8IYB3	600-614	PxxP_8	\N	IQRRYSPSPPPKRRT	bio ado ado-IQRRYSPSPPPKRRT	0.3267	0.0266842	6	4	4.97408	HU (DAPF)	Bait concentration was adjusted to fit the profile to WT	2022.10.24.
BIN1	O00499	513-593	SH3	R581C	his6-MBP-TEVsite-SH3	SRRM1	Q8IYB3	611-625	PxxP_9	\N	KRRTASPPPPPKRRA	bio ado ado-KRRTASPPPPPKRRA	0.280081	0.0417615	6	2	4.86804	HU (DAPF)	Bait concentration was adjusted to fit the profile to WT	2022.10.24.
BIN1	O00499	513-593	SH3	R581C	his6-MBP-TEVsite-SH3	SRRM1	Q8IYB3	612-626	PxxP_10	\N	RRTASPPPPPKRRAS	bio ado ado-RRTASPPPPPKRRAS	0.336032	0.0254081	6	2	4.99443	HU (DAPF)	Bait concentration was adjusted to fit the profile to WT	2022.10.24.
BIN1	O00499	513-593	SH3	R581C	his6-MBP-TEVsite-SH3	SRRM1	Q8IYB3	621-635	PxxP_11	\N	PKRRASPSPPPKRRV	bio ado ado-PKRRASPSPPPKRRV	0.35084	0.00987229	6	4	5.02623	HU (DAPF)	Bait concentration was adjusted to fit the profile to WT	2022.10.24.
BIN1	O00499	513-593	SH3	R581C	his6-MBP-TEVsite-SH3	SRRM1	Q8IYB3	759-773	PxxP_12	\N	PAAKKPPAPPSPVQS	bio ado ado-PAAKKPPAPPSPVQS	0.00592571	0.0121816	6	2	0	HU (DAPF)	Bait concentration was adjusted to fit the profile to WT	2022.10.24.
BIN1	O00499	513-593	SH3	R581C	his6-MBP-TEVsite-SH3	SRRM1	Q8IYB3	776-790	PxxP_13	\N	PSTNWSPAVPVKKAK	bio ado ado-PSTNWSPAVPVKKAK	0.0417088	0.0250427	6	2	0	HU (DAPF)	Bait concentration was adjusted to fit the profile to WT	2022.10.24.
BIN1	O00499	513-593	SH3	R581C	his6-MBP-TEVsite-SH3	SRRM2	Q9UQ35	1405-1419	PxxP_1	\N	PVLDAVPRTPSRERS	bio ado ado-PVLDAVPRTPSRERS	-0.00160746	0.00875483	6	2	0	HU (DAPF)	Bait concentration was adjusted to fit the profile to WT	2022.10.24.
BIN1	O00499	513-593	SH3	R581C	his6-MBP-TEVsite-SH3	SRRM2	Q9UQ35	1426-1440	PxxP_2	\N	EMKDGLPRTPSRRSR	bio ado ado-EMKDGLPRTPSRRSR	0.304602	0.020402	6	2	4.92482	HU (DAPF)	Bait concentration was adjusted to fit the profile to WT	2022.10.24.
BIN1	O00499	513-593	SH3	R581C	his6-MBP-TEVsite-SH3	SRRM2	Q9UQ35	1464-1478	PxxP_3	\N	PGMKDIPRTPSRGRS	bio ado ado-PGMKDIPRTPSRGRS	0.0495754	0.0106099	6	4	0	HU (DAPF)	Bait concentration was adjusted to fit the profile to WT	2022.10.24.
BIN1	O00499	513-593	SH3	R581C	his6-MBP-TEVsite-SH3	SRRM2	Q9UQ35	1484-1498	PxxP_4	\N	PEPKALPQTPRPRSR	bio ado ado-PEPKALPQTPRPRSR	0.095997	0.0261094	6	2	4.26639	HU (DAPF)	Bait concentration was adjusted to fit the profile to WT	2022.10.24.
BIN1	O00499	513-593	SH3	R581C	his6-MBP-TEVsite-SH3	SRRM2	Q9UQ35	1653-1667	PxxP_5	\N	SSTESSPEHPPKSRT	bio ado ado-SSTESSPEHPPKSRT	0.00903128	0.0143496	6	2	0	HU (DAPF)	Bait concentration was adjusted to fit the profile to WT	2022.10.24.
BIN1	O00499	513-593	SH3	R581C	his6-MBP-TEVsite-SH3	SRRM2	Q9UQ35	2029-2043	PxxP_6	\N	RSRSRTPLLPRKRSR	bio ado ado-RSRSRTPLLPRKRSR	0.412762	0.0268106	6	2	5.15432	HU (DAPF)	Bait concentration was adjusted to fit the profile to WT	2022.10.24.
BIN1	O00499	513-593	SH3	R581C	his6-MBP-TEVsite-SH3	SRRM2	Q9UQ35	2405-2419	PxxP_7	\N	ARSRTPPSAPSQSRM	bio ado ado-ARSRTPPSAPSQSRM	0.0156953	0.0425298	6	2	0	HU (DAPF)	Bait concentration was adjusted to fit the profile to WT	2022.10.24.
BIN1	O00499	513-593	SH3	R581C	his6-MBP-TEVsite-SH3	SRRM2	Q9UQ35	2656-2670	PxxP_8	\N	PQALPKPASPKKPPP	bio ado ado-PQALPKPASPKKPPP	0.000183095	0.0200553	6	2	0	HU (DAPF)	Bait concentration was adjusted to fit the profile to WT	2022.10.24.
BIN1	O00499	513-593	SH3	R581C	his6-MBP-TEVsite-SH3	SRRM2	Q9UQ35	400-414	PxxP_9	\N	TRDRSPPKSPEKLPQ	bio ado ado-TRDRSPPKSPEKLPQ	0.00584214	0.0215933	6	4	0	HU (DAPF)	Bait concentration was adjusted to fit the profile to WT	2022.10.24.
BIN1	O00499	513-593	SH3	R581C	his6-MBP-TEVsite-SH3	SRRM2	Q9UQ35	975-989	PxxP_10	\N	PDTKVKPETPPRQSH	bio ado ado-PDTKVKPETPPRQSH	0.0660945	0.010214	6	4	4.08433	HU (DAPF)	Bait concentration was adjusted to fit the profile to WT	2022.10.24.
BIN1	O00499	513-593	SH3	R581C	his6-MBP-TEVsite-SH3	SUB1	P53999	27-41	PxxP_1	\N	RKKQVAPEKPVKKQK	bio ado ado-RKKQVAPEKPVKKQK	0.0572782	0.0911924	6	2	4.01637	HU (DAPF)	Bait concentration was adjusted to fit the profile to WT	2022.10.24.
BIN1	O00499	513-593	SH3	R581C	his6-MBP-TEVsite-SH3	TTF2	Q9UNY4	401-415	PxxP_1	\N	VSKKVEPSDPVARRV	bio ado ado-VSKKVEPSDPVARRV	-0.00743449	0.0186693	6	2	0	HU (DAPF)	Bait concentration was adjusted to fit the profile to WT	2022.10.24.
BIN1	O00499	513-593	SH3	R581C	his6-MBP-TEVsite-SH3	TUBGCP2	Q9BSJ2	876-890	PxxP_1	\N	RSQKATPQVPVLRGP	bio ado ado-RSQKATPQVPVLRGP	0.018476	0.0216565	6	2	0	HU (DAPF)	Bait concentration was adjusted to fit the profile to WT	2022.10.24.
BIN1	O00499	513-593	SH3	R581C	his6-MBP-TEVsite-SH3	ZC3H14	Q6PJT7	329-343	PxxP_1	\N	SSSVSVPAKPERRPS	bio ado ado-SSSVSVPAKPERRPS	0.0313538	0.0103835	6	2	0	HU (DAPF)	Bait concentration was adjusted to fit the profile to WT	2022.10.24.
BIN1	O00499	513-593	SH3	P551L	his6-MBP-TEVsite-SH3	ABL2	P42684	615-629	PxxP_1	\N	QASSGSPALPRKQRD	Bio Ado Ado-QASSGSPALPRKQRD-CONH2	-0.0150568	\N	8	1	0	HU (DAPF)	Bait concentration was adjusted to fit the profile to WT	2023/01/17
BIN1	O00499	513-593	SH3	P551L	his6-MBP-TEVsite-SH3	ABL2	P42684	657-671	PxxP_2	\N	MKKRNAPTPPKRSSS	Bio Ado Ado-MKKRNAPTPPKRSSS-CONH2	0.41807	0.00263421	8	2	5.01671	HU (DAPF)	Bait concentration was adjusted to fit the profile to WT	2023/01/17
BIN1	O00499	513-593	SH3	P551L	his6-MBP-TEVsite-SH3	ABL2	P42684	915-929	PxxP_3	\N	SPAKAAPVLPTTHNH	Bio Ado Ado-SPAKAAPVLPTTHNH-CONH2	-0.00868538	\N	8	1	0	HU (DAPF)	Bait concentration was adjusted to fit the profile to WT	2023/01/17
BIN1	O00499	513-593	SH3	P551L	his6-MBP-TEVsite-SH3	ABL2	P42684	978-992	PxxP_4	\N	VKPKCAPPPPPVMRL	Bio Ado Ado-VKPKCAPPPPPVMRL-CONH2	0.0332482	\N	8	1	0	HU (DAPF)	Bait concentration was adjusted to fit the profile to WT	2023/01/17
BIN1	O00499	513-593	SH3	P551L	his6-MBP-TEVsite-SH3	AGAP2	Q99490	176-190	PxxP_1	\N	RRLKVAPPPPAPKPC	Bio Ado Ado-RRLKVAPPPPAPKPC-CONH2	0.107615	\N	8	1	4.19369	HU (DAPF)	Bait concentration was adjusted to fit the profile to WT	2023/01/17
BIN1	O00499	513-593	SH3	P551L	his6-MBP-TEVsite-SH3	AGAP2	Q99490	577-591	PxxP_2	\N	AACKSLPSSPSHSAA	Bio Ado Ado-AACKSLPSSPSHSAA-CONH2	-0.0172565	\N	8	1	0	HU (DAPF)	Bait concentration was adjusted to fit the profile to WT	2023/01/17
BIN1	O00499	513-593	SH3	P551L	his6-MBP-TEVsite-SH3	AGAP2	Q99490	819-833	PxxP_3	\N	PLSREPPPSPMVKKQ	Bio Ado Ado-PLSREPPPSPMVKKQ-CONH2	-0.0180536	\N	8	1	0	HU (DAPF)	Bait concentration was adjusted to fit the profile to WT	2023/01/17
BIN1	O00499	513-593	SH3	P551L	his6-MBP-TEVsite-SH3	AGAP2	Q99490	91-105	PxxP_4	\N	PALSPAPASPARPVS	Bio Ado Ado-PALSPAPASPARPVS-CONH2	0.0238312	\N	8	1	0	HU (DAPF)	Bait concentration was adjusted to fit the profile to WT	2023/01/17
BIN1	O00499	513-593	SH3	P551L	his6-MBP-TEVsite-SH3	ANKS1A	Q92625	314-328	PxxP_1	\N	EVDKTPPPQPPLISS	Bio Ado Ado-EVDKTPPPQPPLISS-CONH2	-0.0256471	\N	8	1	0	HU (DAPF)	Bait concentration was adjusted to fit the profile to WT	2023/01/17
BIN1	O00499	513-593	SH3	P551L	his6-MBP-TEVsite-SH3	ANKS1A	Q92625	401-415	PxxP_2	\N	VRPRERPPPPAKPPP	Bio Ado Ado-VRPRERPPPPAKPPP-CONH2	-0.0148965	0.00380299	8	2	0	HU (DAPF)	Bait concentration was adjusted to fit the profile to WT	2023/01/17
BIN1	O00499	513-593	SH3	P551L	his6-MBP-TEVsite-SH3	ANKS1A	Q92625	832-846	PxxP_3	\N	RPYEEPPQKPPRFSQ	Bio Ado Ado-RPYEEPPQKPPRFSQ-CONH2	0.128651	\N	8	1	4.28468	HU (DAPF)	Bait concentration was adjusted to fit the profile to WT	2023/01/17
BIN1	O00499	513-593	SH3	P551L	his6-MBP-TEVsite-SH3	ANKS1A	Q92625	885-899	PxxP_4	\N	HDSLHDPAAPSRAER	Bio Ado Ado-HDSLHDPAAPSRAER-CONH2	-0.0358368	\N	8	1	0	HU (DAPF)	Bait concentration was adjusted to fit the profile to WT	2023/01/17
BIN1	O00499	513-593	SH3	P551L	his6-MBP-TEVsite-SH3	ANLN	Q9NQW6	315-329	PxxP_1	\N	ELLPKTPISPLKTGV	Bio Ado Ado-ELLPKTPISPLKTGV-CONH2	-0.0071481	\N	8	1	0	HU (DAPF)	Bait concentration was adjusted to fit the profile to WT	2023/01/17
BIN1	O00499	513-593	SH3	P551L	his6-MBP-TEVsite-SH3	APBB1IP	Q7Z5R6	512-526	PxxP_1	\N	PKSSLPPPPPVRRSS	Bio Ado Ado-PKSSLPPPPPVRRSS-CONH2	0.183265	\N	8	1	4.47458	HU (DAPF)	Bait concentration was adjusted to fit the profile to WT	2023/01/17
BIN1	O00499	513-593	SH3	P551L	his6-MBP-TEVsite-SH3	APBB1IP	Q7Z5R6	526-540	PxxP_2	\N	SDTSGSPATPLKAKG	Bio Ado Ado-SDTSGSPATPLKAKG-CONH2	0.0065905	\N	8	1	0	HU (DAPF)	Bait concentration was adjusted to fit the profile to WT	2023/01/17
BIN1	O00499	513-593	SH3	P551L	his6-MBP-TEVsite-SH3	APBB1IP	Q7Z5R6	621-635	PxxP_3	\N	PAVAKRPPVPPKRQE	Bio Ado Ado-PAVAKRPPVPPKRQE-CONH2	0.171008	\N	8	1	4.43621	HU (DAPF)	Bait concentration was adjusted to fit the profile to WT	2023/01/17
BIN1	O00499	513-593	SH3	P551L	his6-MBP-TEVsite-SH3	APBB1IP	Q7Z5R6	622-636	PxxP_4	\N	AVAKRPPVPPKRQEN	Bio Ado Ado-AVAKRPPVPPKRQEN-CONH2	0.148027	0.00586936	8	2	4.35824	HU (DAPF)	Bait concentration was adjusted to fit the profile to WT	2023/01/17
BIN1	O00499	513-593	SH3	P551L	his6-MBP-TEVsite-SH3	ARAP1	Q96P48	109-123	PxxP_1	\N	EGLPAAPPIPPRRSC	Bio Ado Ado-EGLPAAPPIPPRRSC-CONH2	0.619088	\N	8	1	5.4054	HU (DAPF)	Bait concentration was adjusted to fit the profile to WT	2023/01/17
BIN1	O00499	513-593	SH3	P551L	his6-MBP-TEVsite-SH3	ARAP1	Q96P48	110-124	PxxP_2	\N	GLPAAPPIPPRRSCL	Bio Ado Ado-GLPAAPPIPPRRSCL-CONH2	0.484726	\N	8	1	5.14482	HU (DAPF)	Bait concentration was adjusted to fit the profile to WT	2023/01/17
BIN1	O00499	513-593	SH3	P551L	his6-MBP-TEVsite-SH3	ARAP1	Q96P48	136-150	PxxP_3	\N	APDPVLPPLPAKRHL	Bio Ado Ado-APDPVLPPLPAKRHL-CONH2	0.0401686	\N	8	1	0	HU (DAPF)	Bait concentration was adjusted to fit the profile to WT	2023/01/17
BIN1	O00499	513-593	SH3	P551L	his6-MBP-TEVsite-SH3	ARAP1	Q96P48	150-164	PxxP_4	\N	LAELSVPPVPPRTGP	Bio Ado Ado-LAELSVPPVPPRTGP-CONH2	0.0945736	\N	8	1	4.12938	HU (DAPF)	Bait concentration was adjusted to fit the profile to WT	2023/01/17
BIN1	O00499	513-593	SH3	P551L	his6-MBP-TEVsite-SH3	ARAP1	Q96P48	207-221	PxxP_5	\N	SPPPCPPEIPPKPVR	Bio Ado Ado-SPPPCPPEIPPKPVR-CONH2	0.0418785	\N	8	1	0	HU (DAPF)	Bait concentration was adjusted to fit the profile to WT	2023/01/17
BIN1	O00499	513-593	SH3	P551L	his6-MBP-TEVsite-SH3	ARAP1	Q96P48	210-224	PxxP_6	\N	PCPPEIPPKPVRLFP	Bio Ado Ado-PCPPEIPPKPVRLFP-CONH2	0.0494831	\N	8	1	0	HU (DAPF)	Bait concentration was adjusted to fit the profile to WT	2023/01/17
BIN1	O00499	513-593	SH3	P551L	his6-MBP-TEVsite-SH3	ARAP1	Q96P48	233-247	PxxP_7	\N	EVPEEGPGAPARVMT	Bio Ado Ado-EVPEEGPGAPARVMT-CONH2	-0.00992631	\N	8	1	0	HU (DAPF)	Bait concentration was adjusted to fit the profile to WT	2023/01/17
BIN1	O00499	513-593	SH3	P551L	his6-MBP-TEVsite-SH3	ARHGAP17	Q68EM7	662-676	PxxP_2	\N	HPPSLSPKPPTRSPS	Bio E E Ado Ado-HPPSLSPKPPTRSPS-CONH2	-0.00618971	\N	8	1	0	HU (DAPF)	Bait concentration was adjusted to fit the profile to WT	2023/01/17
BIN1	O00499	513-593	SH3	P551L	his6-MBP-TEVsite-SH3	ARHGAP45	Q92619	1106-1120	PxxP_1	\N	NNVLQAPLPPMRLRG	Bio E E Ado Ado-NNVLQAPLPPMRLRG-CONH2	0.257994	\N	8	1	4.67614	HU (DAPF)	Bait concentration was adjusted to fit the profile to WT	2023/01/17
BIN1	O00499	513-593	SH3	P551L	his6-MBP-TEVsite-SH3	ATAT1	Q5SQI0	210-224	PxxP_1	\N	AAVDPTPAAPARKLP	Bio Ado Ado-AAVDPTPAAPARKLP-CONH2	0.0724348	\N	8	1	3.99986	HU (DAPF)	Bait concentration was adjusted to fit the profile to WT	2023/01/17
BIN1	O00499	513-593	SH3	P551L	his6-MBP-TEVsite-SH3	ATAT1	Q5SQI0	293-307	PxxP_2	\N	RSLRLCPPHPTARLL	Bio Ado Ado-RSLRLCPPHPTARLL-CONH2	0.0180743	\N	8	1	0	HU (DAPF)	Bait concentration was adjusted to fit the profile to WT	2023/01/17
BIN1	O00499	513-593	SH3	P551L	his6-MBP-TEVsite-SH3	ATXN2	Q99700	112-126	PxxP_1	\N	ASPGAPPAAPTRASP	Bio Ado Ado-ASPGAPPAAPTRASP-CONH2	0.027757	\N	8	1	0	HU (DAPF)	Bait concentration was adjusted to fit the profile to WT	2023/01/17
BIN1	O00499	513-593	SH3	P551L	his6-MBP-TEVsite-SH3	ATXN2	Q99700	139-153	PxxP_2	\N	SLARPAPGCPRPACE	Bio Ado Ado-SLARPAPGCPRPACE-CONH2	-0.00910314	\N	8	1	0	HU (DAPF)	Bait concentration was adjusted to fit the profile to WT	2023/01/17
BIN1	O00499	513-593	SH3	P551L	his6-MBP-TEVsite-SH3	ATXN2	Q99700	583-597	PxxP_3	\N	RPPSRPPSRPSRPPS	Bio Ado Ado-RPPSRPPSRPSRPPS-CONH2	0.0646624	\N	8	1	3.94582	HU (DAPF)	Bait concentration was adjusted to fit the profile to WT	2023/01/17
BIN1	O00499	513-593	SH3	P551L	his6-MBP-TEVsite-SH3	ATXN2	Q99700	995-1009	PxxP_4	\N	KTYRAVPNMPQQRQD	Bio Ado Ado-KTYRAVPNMPQQRQD-CONH2	0.0182798	\N	8	1	0	HU (DAPF)	Bait concentration was adjusted to fit the profile to WT	2023/01/17
BIN1	O00499	513-593	SH3	P551L	his6-MBP-TEVsite-SH3	BIRC6	Q9NR09	3927-3941	PxxP_1	\N	AVSATPPRPPSRRGR	Bio Ado Ado-AVSATPPRPPSRRGR-CONH2	0.579132	\N	8	1	5.3261	HU (DAPF)	Bait concentration was adjusted to fit the profile to WT	2023/01/17
BIN1	O00499	513-593	SH3	P551L	his6-MBP-TEVsite-SH3	BUD13	Q9BRD0	219-233	PxxP_2	\N	RHDSPDPSPPRRARH	Bio E E Ado Ado-RHDSPDPSPPRRARH-CONH2	0.168569	\N	8	1	4.42833	HU (DAPF)	Bait concentration was adjusted to fit the profile to WT	2023/01/17
BIN1	O00499	513-593	SH3	P551L	his6-MBP-TEVsite-SH3	C19orf47	Q8N9M1	147-161	PxxP_1	\N	LNHDSPPSTPPRRPD	Bio Ado Ado-LNHDSPPSTPPRRPD-CONH2	0.00711272	\N	8	1	0	HU (DAPF)	Bait concentration was adjusted to fit the profile to WT	2023/01/17
BIN1	O00499	513-593	SH3	P551L	his6-MBP-TEVsite-SH3	CAMSAP1	Q5T5Y3	1359-1373	PxxP_1	\N	GKPKSKPKKPRPKSV	Bio Ado Ado-GKPKSKPKKPRPKSV-CONH2	-0.0180032	\N	8	1	0	HU (DAPF)	Bait concentration was adjusted to fit the profile to WT	2023/01/17
BIN1	O00499	513-593	SH3	P551L	his6-MBP-TEVsite-SH3	CAMSAP1	Q5T5Y3	1586-1600	PxxP_2	\N	LWQPKRPAVPKKAQT	Bio Ado Ado-LWQPKRPAVPKKAQT-CONH2	0.0324747	\N	8	1	0	HU (DAPF)	Bait concentration was adjusted to fit the profile to WT	2023/01/17
BIN1	O00499	513-593	SH3	P551L	his6-MBP-TEVsite-SH3	CAMSAP1	Q5T5Y3	414-428	PxxP_3	\N	AFSPSHPLLPLRQKQ	Bio Ado Ado-AFSPSHPLLPLRQKQ-CONH2	0.0218471	\N	8	1	0	HU (DAPF)	Bait concentration was adjusted to fit the profile to WT	2023/01/17
BIN1	O00499	513-593	SH3	P551L	his6-MBP-TEVsite-SH3	CAPRIN1	Q14444	687-701	PxxP_1	\N	PRGRGGPPRPNRGMP	Bio Ado Ado-PRGRGGPPRPNRGMP-CONH2	0.0142046	0.00555172	8	2	0	HU (DAPF)	Bait concentration was adjusted to fit the profile to WT	2023/01/17
BIN1	O00499	513-593	SH3	P551L	his6-MBP-TEVsite-SH3	CARMIL2	Q6F5E8	1030-1044	PxxP_1	\N	HHHRPPPGGPQVPPA	Bio Ado Ado-HHHRPPPGGPQVPPA-CONH2	0.00962508	\N	8	1	0	HU (DAPF)	Bait concentration was adjusted to fit the profile to WT	2023/01/17
BIN1	O00499	513-593	SH3	P551L	his6-MBP-TEVsite-SH3	CARMIL2	Q6F5E8	1133-1147	PxxP_2	\N	GDLLRPPTRPSRGEE	Bio Ado Ado-GDLLRPPTRPSRGEE-CONH2	0.0240141	\N	8	1	0	HU (DAPF)	Bait concentration was adjusted to fit the profile to WT	2023/01/17
BIN1	O00499	513-593	SH3	P551L	his6-MBP-TEVsite-SH3	CARMIL2	Q6F5E8	1408-1422	PxxP_3	\N	PPQPTEPSSPERSPP	Bio Ado Ado-PPQPTEPSSPERSPP-CONH2	-0.000619036	\N	8	1	0	HU (DAPF)	Bait concentration was adjusted to fit the profile to WT	2023/01/17
BIN1	O00499	513-593	SH3	P551L	his6-MBP-TEVsite-SH3	CASKIN2	Q8WXE0	1121-1135	PxxP_1	\N	PRLGPRPVPPPRPES	Bio Ado Ado-PRLGPRPVPPPRPES-CONH2	0.0341225	\N	8	1	0	HU (DAPF)	Bait concentration was adjusted to fit the profile to WT	2023/01/17
BIN1	O00499	513-593	SH3	P551L	his6-MBP-TEVsite-SH3	CASKIN2	Q8WXE0	683-697	PxxP_2	\N	GGPEPLPLPPARSPS	Bio Ado Ado-GGPEPLPLPPARSPS-CONH2	0.00328209	\N	8	1	0	HU (DAPF)	Bait concentration was adjusted to fit the profile to WT	2023/01/17
BIN1	O00499	513-593	SH3	P551L	his6-MBP-TEVsite-SH3	CASKIN2	Q8WXE0	782-796	PxxP_3	\N	AGPPATPPDPPRPKR	Bio Ado Ado-AGPPATPPDPPRPKR-CONH2	0.0414772	\N	8	1	0	HU (DAPF)	Bait concentration was adjusted to fit the profile to WT	2023/01/17
BIN1	O00499	513-593	SH3	P551L	his6-MBP-TEVsite-SH3	CASKIN2	Q8WXE0	785-799	PxxP_4	\N	PATPPDPPRPKRRSH	Bio Ado Ado-PATPPDPPRPKRRSH-CONH2	0.131397	\N	8	1	4.29563	HU (DAPF)	Bait concentration was adjusted to fit the profile to WT	2023/01/17
BIN1	O00499	513-593	SH3	P551L	his6-MBP-TEVsite-SH3	CASKIN2	Q8WXE0	862-876	PxxP_5	\N	RARRKGPPPPPPKRL	Bio Ado Ado-RARRKGPPPPPPKRL-CONH2	0.363775	\N	8	1	4.90878	HU (DAPF)	Bait concentration was adjusted to fit the profile to WT	2023/01/17
BIN1	O00499	513-593	SH3	P551L	his6-MBP-TEVsite-SH3	CASKIN2	Q8WXE0	863-877	PxxP_6	\N	ARRKGPPPPPPKRLS	Bio Ado Ado-ARRKGPPPPPPKRLS-CONH2	0.255584	0.00586037	8	2	4.67029	HU (DAPF)	Bait concentration was adjusted to fit the profile to WT	2023/01/17
BIN1	O00499	513-593	SH3	P551L	his6-MBP-TEVsite-SH3	CASKIN2	Q8WXE0	864-878	PxxP_7	\N	RRKGPPPPPPKRLSS	Bio Ado Ado-RRKGPPPPPPKRLSS-CONH2	0.261506	\N	8	1	4.68462	HU (DAPF)	Bait concentration was adjusted to fit the profile to WT	2023/01/17
BIN1	O00499	513-593	SH3	P551L	his6-MBP-TEVsite-SH3	CASKIN2	Q8WXE0	960-974	PxxP_8	\N	IKQRPKPAGPPPRET	Bio Ado Ado-IKQRPKPAGPPPRET-CONH2	0.0508195	\N	8	1	3.83282	HU (DAPF)	Bait concentration was adjusted to fit the profile to WT	2023/01/17
BIN1	O00499	513-593	SH3	P551L	his6-MBP-TEVsite-SH3	CASKIN2	Q8WXE0	969-983	PxxP_9	\N	PPPRETPVPPGLDFN	Bio Ado Ado-PPPRETPVPPGLDFN-CONH2	-0.00882064	\N	8	1	0	HU (DAPF)	Bait concentration was adjusted to fit the profile to WT	2023/01/17
BIN1	O00499	513-593	SH3	P551L	his6-MBP-TEVsite-SH3	CAST	P20810	12-26	PxxP_1	\N	SQQMEGPHLPNKKKH	Bio Ado Ado-SQQMEGPHLPNKKKH-CONH2	-0.0121921	\N	8	1	0	HU (DAPF)	Bait concentration was adjusted to fit the profile to WT	2023/01/17
BIN1	O00499	513-593	SH3	P551L	his6-MBP-TEVsite-SH3	CAST	P20810	379-393	PxxP_2	\N	SECKEKPSKPTEKTE	Bio Ado Ado-SECKEKPSKPTEKTE-CONH2	-0.0127478	\N	8	1	0	HU (DAPF)	Bait concentration was adjusted to fit the profile to WT	2023/01/17
BIN1	O00499	513-593	SH3	P551L	his6-MBP-TEVsite-SH3	CC2D1A	Q6P1N0	3-17	PxxP_1	\N	KRKGPPGPPGRGAAA	Bio Ado Ado-KRKGPPGPPGRGAAA-CONH2	-0.0225594	0.0157879	8	3	0	HU (DAPF)	Bait concentration was adjusted to fit the profile to WT	2023/01/17
BIN1	O00499	513-593	SH3	P551L	his6-MBP-TEVsite-SH3	CD2AP	Q9Y5K6	335-349	PxxP_1	\N	FPKPKKPPPPAKAPA	Bio Ado Ado-FPKPKKPPPPAKAPA-CONH2	-0.00830902	\N	8	1	0	HU (DAPF)	Bait concentration was adjusted to fit the profile to WT	2023/01/17
BIN1	O00499	513-593	SH3	P551L	his6-MBP-TEVsite-SH3	CD2AP	Q9Y5K6	379-393	PxxP_2	\N	PSKPAAPQVPPKKPT	Bio Ado Ado-PSKPAAPQVPPKKPT-CONH2	0.0253808	\N	8	1	0	HU (DAPF)	Bait concentration was adjusted to fit the profile to WT	2023/01/17
BIN1	O00499	513-593	SH3	P551L	his6-MBP-TEVsite-SH3	CD2AP	Q9Y5K6	386-400	PxxP_3	\N	QVPPKKPTPPTKASN	Bio Ado Ado-QVPPKKPTPPTKASN-CONH2	0.0297649	\N	8	1	0	HU (DAPF)	Bait concentration was adjusted to fit the profile to WT	2023/01/17
BIN1	O00499	513-593	SH3	P551L	his6-MBP-TEVsite-SH3	CD2AP	Q9Y5K6	404-418	PxxP_4	\N	SSGTVYPKRPEKPVP	Bio Ado Ado-SSGTVYPKRPEKPVP-CONH2	-0.0258348	\N	8	1	0	HU (DAPF)	Bait concentration was adjusted to fit the profile to WT	2023/01/17
BIN1	O00499	513-593	SH3	P551L	his6-MBP-TEVsite-SH3	CD2AP	Q9Y5K6	412-426	PxxP_5	\N	RPEKPVPPPPPIAKI	Bio Ado Ado-RPEKPVPPPPPIAKI-CONH2	-0.0155104	\N	8	1	0	HU (DAPF)	Bait concentration was adjusted to fit the profile to WT	2023/01/17
BIN1	O00499	513-593	SH3	P551L	his6-MBP-TEVsite-SH3	CD2AP	Q9Y5K6	488-502	PxxP_6	\N	HLTANRPKMPGRRLP	Bio Ado Ado-HLTANRPKMPGRRLP-CONH2	0.00251755	\N	8	1	0	HU (DAPF)	Bait concentration was adjusted to fit the profile to WT	2023/01/17
BIN1	O00499	513-593	SH3	P551L	his6-MBP-TEVsite-SH3	CD3EAP	O15446	317-331	PxxP_1	\N	PLEEAIPLPPTKKRK	Bio Ado Ado-PLEEAIPLPPTKKRK-CONH2	0.0235496	\N	8	1	0	HU (DAPF)	Bait concentration was adjusted to fit the profile to WT	2023/01/17
BIN1	O00499	513-593	SH3	P551L	his6-MBP-TEVsite-SH3	CDC27	P30260	396-410	PxxP_1	\N	LKMKFPPKIPNRKTK	Bio E E Ado Ado-LKMKFPPKIPNRKTK-CONH2	0.472325	\N	8	1	5.12116	HU (DAPF)	Bait concentration was adjusted to fit the profile to WT	2023/01/17
BIN1	O00499	513-593	SH3	P551L	his6-MBP-TEVsite-SH3	CDT1	Q9H211	48-62	PxxP_1	\N	RKRARPPAAPGRDQA	Bio Ado Ado-RKRARPPAAPGRDQA-CONH2	0.022327	\N	8	1	0	HU (DAPF)	Bait concentration was adjusted to fit the profile to WT	2023/01/17
BIN1	O00499	513-593	SH3	P551L	his6-MBP-TEVsite-SH3	CDT1	Q9H211	9-23	PxxP_2	\N	FFARRRPGPPRIAPP	Bio Ado Ado-FFARRRPGPPRIAPP-CONH2	0.0102489	\N	8	1	0	HU (DAPF)	Bait concentration was adjusted to fit the profile to WT	2023/01/17
BIN1	O00499	513-593	SH3	P551L	his6-MBP-TEVsite-SH3	CENPT	Q96BT3	19-33	PxxP_1	\N	VLDTADPRTPRRPRS	Bio Ado Ado-VLDTADPRTPRRPRS-CONH2	-0.0328834	\N	8	1	0	HU (DAPF)	Bait concentration was adjusted to fit the profile to WT	2023/01/17
BIN1	O00499	513-593	SH3	P551L	his6-MBP-TEVsite-SH3	CENPT	Q96BT3	283-297	PxxP_2	\N	GLQKNSPGKPAQFLA	Bio Ado Ado-GLQKNSPGKPAQFLA-CONH2	-0.0242223	\N	8	1	0	HU (DAPF)	Bait concentration was adjusted to fit the profile to WT	2023/01/17
BIN1	O00499	513-593	SH3	P551L	his6-MBP-TEVsite-SH3	CEP170	Q5SW79	640-654	PxxP_1	\N	RRRRTLPQLPNEEKS	Bio Ado Ado-RRRRTLPQLPNEEKS-CONH2	0.221093	\N	8	1	4.58238	HU (DAPF)	Bait concentration was adjusted to fit the profile to WT	2023/01/17
BIN1	O00499	513-593	SH3	P551L	his6-MBP-TEVsite-SH3	CEP170	Q5SW79	840-854	PxxP_2	\N	TIEKPSPNIPIELIP	Bio Ado Ado-TIEKPSPNIPIELIP-CONH2	-0.0240384	\N	8	1	0	HU (DAPF)	Bait concentration was adjusted to fit the profile to WT	2023/01/17
BIN1	O00499	513-593	SH3	P551L	his6-MBP-TEVsite-SH3	CIZ1	Q9ULV3	881-895	PxxP_1	\N	TARPSQPPLPRRSTR	Bio Ado Ado-TARPSQPPLPRRSTR-CONH2	0.141479	\N	8	1	4.33429	HU (DAPF)	Bait concentration was adjusted to fit the profile to WT	2023/01/17
BIN1	O00499	513-593	SH3	P551L	his6-MBP-TEVsite-SH3	CPSF7	Q8N684	45-59	PxxP_1	\N	RSSSTEPPPPVRQEP	Bio Ado Ado-RSSSTEPPPPVRQEP-CONH2	-0.0536544	\N	8	1	0	HU (DAPF)	Bait concentration was adjusted to fit the profile to WT	2023/01/17
BIN1	O00499	513-593	SH3	P551L	his6-MBP-TEVsite-SH3	DCAF12	Q5T6F0	7-21	PxxP_1	\N	SRKRKAPASPGAGSD	Bio Ado Ado-SRKRKAPASPGAGSD-CONH2	-0.00852238	\N	8	1	0	HU (DAPF)	Bait concentration was adjusted to fit the profile to WT	2023/01/17
BIN1	O00499	513-593	SH3	P551L	his6-MBP-TEVsite-SH3	DENND1A	Q8TEH3	553-567	PxxP_1	\N	KSTGPVPAPPDRAAS	Bio Ado Ado-KSTGPVPAPPDRAAS-CONH2	-0.00454181	\N	8	1	0	HU (DAPF)	Bait concentration was adjusted to fit the profile to WT	2023/01/17
BIN1	O00499	513-593	SH3	P551L	his6-MBP-TEVsite-SH3	DENND1A	Q8TEH3	942-956	PxxP_2	\N	LRPGDPPLLPPRPPQ	Bio Ado Ado-LRPGDPPLLPPRPPQ-CONH2	-0.014014	\N	8	1	0	HU (DAPF)	Bait concentration was adjusted to fit the profile to WT	2023/01/17
BIN1	O00499	513-593	SH3	P551L	his6-MBP-TEVsite-SH3	DIDO1	Q9BTC0	441-455	PxxP_1	\N	EKMKMKPEKPSLPKC	Bio Ado Ado-EKMKMKPEKPSLPKC-CONH2	-0.0288955	\N	8	1	0	HU (DAPF)	Bait concentration was adjusted to fit the profile to WT	2023/01/17
BIN1	O00499	513-593	SH3	P551L	his6-MBP-TEVsite-SH3	DNM2	P50570	826-840	PxxP_4	\N	PAPPQIPSRPVRIPP	Bio E E Ado Ado-PAPPQIPSRPVRIPP-CONH2	0.0407884	\N	8	1	0	HU (DAPF)	Bait concentration was adjusted to fit the profile to WT	2023/01/17
BIN1	O00499	513-593	SH3	P551L	his6-MBP-TEVsite-SH3	DNM2	P50570	838-852	PxxP_6	\N	IPPGIPPGVPSRRPP	Bio E E Ado Ado-IPPGIPPGVPSRRPP-CONH2	0.0314792	\N	8	1	0	HU (DAPF)	Bait concentration was adjusted to fit the profile to WT	2023/01/17
BIN1	O00499	513-593	SH3	P551L	his6-MBP-TEVsite-SH3	DNMT1	P26358	129-143	PxxP_1	\N	PKPLSKPRTPRRSKS	Bio E E Ado Ado-PKPLSKPRTPRRSKS-CONH2	0.0199602	\N	8	1	0	HU (DAPF)	Bait concentration was adjusted to fit the profile to WT	2023/01/17
BIN1	O00499	513-593	SH3	P551L	his6-MBP-TEVsite-SH3	ELMSAN1	Q6PJG2	175-189	PxxP_1	\N	LDRYVRPMMPQKVQL	Bio Ado Ado-LDRYVRPMMPQKVQL-CONH2	-0.0217655	\N	8	1	0	HU (DAPF)	Bait concentration was adjusted to fit the profile to WT	2023/01/17
BIN1	O00499	513-593	SH3	P551L	his6-MBP-TEVsite-SH3	ELMSAN1	Q6PJG2	228-242	PxxP_2	\N	QVFRQGPPPPNPVAA	Bio Ado Ado-QVFRQGPPPPNPVAA-CONH2	-0.0109563	\N	8	1	0	HU (DAPF)	Bait concentration was adjusted to fit the profile to WT	2023/01/17
BIN1	O00499	513-593	SH3	P551L	his6-MBP-TEVsite-SH3	ESPL1	Q14674	1338-1352	PxxP_1	\N	LEGRGLPCTPKPPDR	Bio Ado Ado-LEGRGLPCTPKPPDR-CONH2	0.0348342	\N	8	1	0	HU (DAPF)	Bait concentration was adjusted to fit the profile to WT	2023/01/17
BIN1	O00499	513-593	SH3	P551L	his6-MBP-TEVsite-SH3	ESPL1	Q14674	1341-1355	PxxP_2	\N	RGLPCTPKPPDRIRQ	Bio Ado Ado-RGLPCTPKPPDRIRQ-CONH2	0.204067	\N	8	1	4.53561	HU (DAPF)	Bait concentration was adjusted to fit the profile to WT	2023/01/17
BIN1	O00499	513-593	SH3	P551L	his6-MBP-TEVsite-SH3	EZH2	Q15910	341-355	PxxP_1	\N	ERIKTPPKRPGGRRR	Bio E E Ado Ado-ERIKTPPKRPGGRRR-CONH2	-0.0134382	\N	8	1	0	HU (DAPF)	Bait concentration was adjusted to fit the profile to WT	2023/01/17
BIN1	O00499	513-593	SH3	P551L	his6-MBP-TEVsite-SH3	FKBPL	Q9UIM3	33-47	PxxP_1	\N	IQIRQQPRDPPTETL	Bio Ado Ado-IQIRQQPRDPPTETL-CONH2	0.03979	\N	8	1	0	HU (DAPF)	Bait concentration was adjusted to fit the profile to WT	2023/01/17
BIN1	O00499	513-593	SH3	P551L	his6-MBP-TEVsite-SH3	G3BP2	Q9UN86	231-245	PxxP_1	\N	AEPVSLPQEPPKAFS	Bio Ado Ado-AEPVSLPQEPPKAFS-CONH2	-0.0555307	\N	8	1	0	HU (DAPF)	Bait concentration was adjusted to fit the profile to WT	2023/01/17
BIN1	O00499	513-593	SH3	P551L	his6-MBP-TEVsite-SH3	G3BP2	Q9UN86	294-308	PxxP_2	\N	QRPRERPGFPPRGPR	Bio Ado Ado-QRPRERPGFPPRGPR-CONH2	0.0516846	0.0105184	8	2	3.84068	HU (DAPF)	Bait concentration was adjusted to fit the profile to WT	2023/01/17
BIN1	O00499	513-593	SH3	P551L	his6-MBP-TEVsite-SH3	GAR1	Q9NY12	153-167	PxxP_1	\N	PLQRFLPRPPGEKGP	Bio Ado Ado-PLQRFLPRPPGEKGP-CONH2	0.0167988	\N	8	1	0	HU (DAPF)	Bait concentration was adjusted to fit the profile to WT	2023/01/17
BIN1	O00499	513-593	SH3	P551L	his6-MBP-TEVsite-SH3	GAS2L1	Q99501	166-180	PxxP_1	\N	RELRAAPPAPNAPAA	Bio Ado Ado-RELRAAPPAPNAPAA-CONH2	-0.0290427	\N	8	1	0	HU (DAPF)	Bait concentration was adjusted to fit the profile to WT	2023/01/17
BIN1	O00499	513-593	SH3	P551L	his6-MBP-TEVsite-SH3	GAS2L1	Q99501	185-199	PxxP_2	\N	TETAPAPGTPARGPR	Bio Ado Ado-TETAPAPGTPARGPR-CONH2	0.049971	\N	8	1	0	HU (DAPF)	Bait concentration was adjusted to fit the profile to WT	2023/01/17
BIN1	O00499	513-593	SH3	P551L	his6-MBP-TEVsite-SH3	GAS2L1	Q99501	326-340	PxxP_3	\N	RSTKEGPETPPRPRD	Bio Ado Ado-RSTKEGPETPPRPRD-CONH2	-0.0163679	0.0192795	8	2	0	HU (DAPF)	Bait concentration was adjusted to fit the profile to WT	2023/01/17
BIN1	O00499	513-593	SH3	P551L	his6-MBP-TEVsite-SH3	GAS2L1	Q99501	386-400	PxxP_4	\N	RLTTGTPASPRRPPA	Bio Ado Ado-RLTTGTPASPRRPPA-CONH2	-0.0333824	\N	8	1	0	HU (DAPF)	Bait concentration was adjusted to fit the profile to WT	2023/01/17
BIN1	O00499	513-593	SH3	P551L	his6-MBP-TEVsite-SH3	GAS2L1	Q99501	466-480	PxxP_5	\N	GSGRSTPQTPRARSP	Bio Ado Ado-GSGRSTPQTPRARSP-CONH2	-0.00215794	\N	8	1	0	HU (DAPF)	Bait concentration was adjusted to fit the profile to WT	2023/01/17
BIN1	O00499	513-593	SH3	P551L	his6-MBP-TEVsite-SH3	GAS2L1	Q99501	644-658	PxxP_6	\N	PSRIPTPRGPRRPSG	Bio Ado Ado-PSRIPTPRGPRRPSG-CONH2	0.0219025	\N	8	1	0	HU (DAPF)	Bait concentration was adjusted to fit the profile to WT	2023/01/17
BIN1	O00499	513-593	SH3	P551L	his6-MBP-TEVsite-SH3	GLCCI1	Q86VQ1	140-154	PxxP_1	\N	SPERRSPGSPVCRAD	Bio Ado Ado-SPERRSPGSPVCRAD-CONH2	0.0189472	\N	8	1	0	HU (DAPF)	Bait concentration was adjusted to fit the profile to WT	2023/01/17
BIN1	O00499	513-593	SH3	P551L	his6-MBP-TEVsite-SH3	GPATCH8	Q9UKJ3	602-616	PxxP_1	\N	HLQGLDPGEPNKSKE	Bio Ado Ado-HLQGLDPGEPNKSKE-CONH2	-0.0136255	\N	8	1	0	HU (DAPF)	Bait concentration was adjusted to fit the profile to WT	2023/01/17
BIN1	O00499	513-593	SH3	P551L	his6-MBP-TEVsite-SH3	GPATCH8	Q9UKJ3	735-749	PxxP_2	\N	PPGSGSPAPPRRRRR	Bio Ado Ado-PPGSGSPAPPRRRRR-CONH2	0.653549	\N	8	1	5.47624	HU (DAPF)	Bait concentration was adjusted to fit the profile to WT	2023/01/17
BIN1	O00499	513-593	SH3	P551L	his6-MBP-TEVsite-SH3	GTSE1	Q9NYZ3	235-249	PxxP_1	\N	KPKKEIPASPSRTKI	Bio Ado Ado-KPKKEIPASPSRTKI-CONH2	0.0322416	0.00657426	8	2	0	HU (DAPF)	Bait concentration was adjusted to fit the profile to WT	2023/01/17
BIN1	O00499	513-593	SH3	P551L	his6-MBP-TEVsite-SH3	HNRNPK	P61978	285-299	PxxP_4	\N	PRRGPPPPPPGRGGR	Bio E E Ado Ado-PRRGPPPPPPGRGGR-CONH2	0.306971	\N	8	1	4.7889	HU (DAPF)	Bait concentration was adjusted to fit the profile to WT	2023/01/17
BIN1	O00499	513-593	SH3	P551L	his6-MBP-TEVsite-SH3	IFRD2	Q12894	57-71	PxxP_1	\N	RPPRPVPGMPRARKG	Bio Ado Ado-RPPRPVPGMPRARKG-CONH2	0.0518713	\N	8	1	3.84235	HU (DAPF)	Bait concentration was adjusted to fit the profile to WT	2023/01/17
BIN1	O00499	513-593	SH3	P551L	his6-MBP-TEVsite-SH3	IQSEC1	Q6DN90	435-449	PxxP_1	\N	PELRPRPPRPLDSHL	Bio Ado Ado-PELRPRPPRPLDSHL-CONH2	-0.0177052	\N	8	1	0	HU (DAPF)	Bait concentration was adjusted to fit the profile to WT	2023/01/17
BIN1	O00499	513-593	SH3	P551L	his6-MBP-TEVsite-SH3	ITCH	Q96J02	244-258	PxxP_1	\N	SNGGFKPSRPPRPSR	Bio Ado Ado-SNGGFKPSRPPRPSR-CONH2	0.559431	\N	8	1	5.28779	HU (DAPF)	Bait concentration was adjusted to fit the profile to WT	2023/01/17
BIN1	O00499	513-593	SH3	P551L	his6-MBP-TEVsite-SH3	ITCH	Q96J02	247-261	PxxP_2	\N	GFKPSRPPRPSRPPP	Bio Ado Ado-GFKPSRPPRPSRPPP-CONH2	0.499092	\N	8	1	5.17219	HU (DAPF)	Bait concentration was adjusted to fit the profile to WT	2023/01/17
BIN1	O00499	513-593	SH3	P551L	his6-MBP-TEVsite-SH3	ITCH	Q96J02	255-269	PxxP_3	\N	RPSRPPPPTPRRPAS	Bio Ado Ado-RPSRPPPPTPRRPAS-CONH2	0.10335	0.0187216	8	2	4.17344	HU (DAPF)	Bait concentration was adjusted to fit the profile to WT	2023/01/17
BIN1	O00499	513-593	SH3	P551L	his6-MBP-TEVsite-SH3	ITCH	Q96J02	353-367	PxxP_4	\N	TWDRPEPLPPGWERR	Bio Ado Ado-TWDRPEPLPPGWERR-CONH2	-0.0247164	\N	8	1	0	HU (DAPF)	Bait concentration was adjusted to fit the profile to WT	2023/01/17
BIN1	O00499	513-593	SH3	P551L	his6-MBP-TEVsite-SH3	KATNB1	Q9BVA0	323-337	PxxP_1	\N	AQPLPNPSAPLRRIY	Bio Ado Ado-AQPLPNPSAPLRRIY-CONH2	0.1787	\N	8	1	4.46052	HU (DAPF)	Bait concentration was adjusted to fit the profile to WT	2023/01/17
BIN1	O00499	513-593	SH3	P551L	his6-MBP-TEVsite-SH3	KDM2A	Q9Y2K7	545-559	PxxP_1	\N	PAPRLTPVRPAAASP	Bio Ado Ado-PAPRLTPVRPAAASP-CONH2	0.0197056	\N	8	1	0	HU (DAPF)	Bait concentration was adjusted to fit the profile to WT	2023/01/17
BIN1	O00499	513-593	SH3	P551L	his6-MBP-TEVsite-SH3	KDM2B	Q8NHM5	1041-1055	PxxP_1	\N	HVIRPPPISPPPDSL	Bio Ado Ado-HVIRPPPISPPPDSL-CONH2	0.0141075	\N	8	1	0	HU (DAPF)	Bait concentration was adjusted to fit the profile to WT	2023/01/17
BIN1	O00499	513-593	SH3	P551L	his6-MBP-TEVsite-SH3	KDM2B	Q8NHM5	892-906	PxxP_2	\N	EPEDELPEAPPKTRE	Bio Ado Ado-EPEDELPEAPPKTRE-CONH2	-0.0100392	\N	8	1	0	HU (DAPF)	Bait concentration was adjusted to fit the profile to WT	2023/01/17
BIN1	O00499	513-593	SH3	P551L	his6-MBP-TEVsite-SH3	KIF2C	Q99661	140-154	PxxP_1	\N	RKQFSVPPAPTRPSC	Bio Ado Ado-RKQFSVPPAPTRPSC-CONH2	0.00369914	\N	8	1	0	HU (DAPF)	Bait concentration was adjusted to fit the profile to WT	2023/01/17
BIN1	O00499	513-593	SH3	P551L	his6-MBP-TEVsite-SH3	KIFC1	Q9BW19	104-118	PxxP_1	\N	KNQKPVPAVPVQKSG	Bio Ado Ado-KNQKPVPAVPVQKSG-CONH2	0.0118412	\N	8	1	0	HU (DAPF)	Bait concentration was adjusted to fit the profile to WT	2023/01/17
BIN1	O00499	513-593	SH3	P551L	his6-MBP-TEVsite-SH3	KIFC1	Q9BW19	358-372	PxxP_2	\N	GTLSGAPAPPTRHDF	Bio Ado Ado-GTLSGAPAPPTRHDF-CONH2	-0.00045871	\N	8	1	0	HU (DAPF)	Bait concentration was adjusted to fit the profile to WT	2023/01/17
BIN1	O00499	513-593	SH3	P551L	his6-MBP-TEVsite-SH3	LENG1	Q96BZ8	184-198	PxxP_1	\N	GSEKQRPKEPPSLDQ	Bio Ado Ado-GSEKQRPKEPPSLDQ-CONH2	-0.0188358	\N	8	1	0	HU (DAPF)	Bait concentration was adjusted to fit the profile to WT	2023/01/17
BIN1	O00499	513-593	SH3	P551L	his6-MBP-TEVsite-SH3	LMNB1	P20700	15-29	PxxP_1	\N	AGGPTTPLSPTRLSR	Bio Ado Ado-AGGPTTPLSPTRLSR-CONH2	0.0252626	\N	8	1	0	HU (DAPF)	Bait concentration was adjusted to fit the profile to WT	2023/01/17
BIN1	O00499	513-593	SH3	P551L	his6-MBP-TEVsite-SH3	LRRC41	Q15345	352-366	PxxP_1	\N	PGTKRSPSAPAATSS	Bio Ado Ado-PGTKRSPSAPAATSS-CONH2	-0.00817106	\N	8	1	0	HU (DAPF)	Bait concentration was adjusted to fit the profile to WT	2023/01/17
BIN1	O00499	513-593	SH3	P551L	his6-MBP-TEVsite-SH3	LRRC41	Q15345	560-574	PxxP_2	\N	PSQRDNPGVPGNAGP	Bio Ado Ado-PSQRDNPGVPGNAGP-CONH2	-0.0026365	\N	8	1	0	HU (DAPF)	Bait concentration was adjusted to fit the profile to WT	2023/01/17
BIN1	O00499	513-593	SH3	P551L	his6-MBP-TEVsite-SH3	LUZP1	Q86V48	1062-1076	PxxP_1	\N	AEERLRPTRPCAEEN	Bio Ado Ado-AEERLRPTRPCAEEN-CONH2	0.019898	\N	8	1	0	HU (DAPF)	Bait concentration was adjusted to fit the profile to WT	2023/01/17
BIN1	O00499	513-593	SH3	P551L	his6-MBP-TEVsite-SH3	MAP2K7	O14733	285-299	PxxP_1	\N	APERIDPPDPTKPDY	Bio Ado Ado-APERIDPPDPTKPDY-CONH2	0.0164795	0.00113725	8	2	0	HU (DAPF)	Bait concentration was adjusted to fit the profile to WT	2023/01/17
BIN1	O00499	513-593	SH3	P551L	his6-MBP-TEVsite-SH3	MAP2K7	O14733	59-73	PxxP_2	\N	ESSPQHPTPPARPRH	Bio Ado Ado-ESSPQHPTPPARPRH-CONH2	0.157232	\N	8	1	4.39052	HU (DAPF)	Bait concentration was adjusted to fit the profile to WT	2023/01/17
BIN1	O00499	513-593	SH3	P551L	his6-MBP-TEVsite-SH3	MAP4K5	Q9Y4K4	384-398	PxxP_1	\N	SKRAIPPPLPPKPRI	Bio Ado Ado-SKRAIPPPLPPKPRI-CONH2	0.0249079	\N	8	1	0	HU (DAPF)	Bait concentration was adjusted to fit the profile to WT	2023/01/17
BIN1	O00499	513-593	SH3	P551L	his6-MBP-TEVsite-SH3	MAP4K5	Q9Y4K4	461-475	PxxP_2	\N	EGSAQAPQLPRKKDK	Bio Ado Ado-EGSAQAPQLPRKKDK-CONH2	0.0136594	\N	8	1	0	HU (DAPF)	Bait concentration was adjusted to fit the profile to WT	2023/01/17
BIN1	O00499	513-593	SH3	P551L	his6-MBP-TEVsite-SH3	MDC1	Q14676	1040-1054	PxxP_1	\N	PTVPEAPAPPQKPLN	Bio Ado Ado-PTVPEAPAPPQKPLN-CONH2	0.0121848	\N	8	1	0	HU (DAPF)	Bait concentration was adjusted to fit the profile to WT	2023/01/17
BIN1	O00499	513-593	SH3	P551L	his6-MBP-TEVsite-SH3	MDC1	Q14676	990-1004	PxxP_2	\N	SGGRGSPVSPRRHQK	Bio Ado Ado-SGGRGSPVSPRRHQK-CONH2	0.0544459	0.00438455	8	2	3.86494	HU (DAPF)	Bait concentration was adjusted to fit the profile to WT	2023/01/17
BIN1	O00499	513-593	SH3	P551L	his6-MBP-TEVsite-SH3	MICALL1	Q8N3F8	272-286	PxxP_1	\N	ASPEARPQIPTKPRV	Bio Ado Ado-ASPEARPQIPTKPRV-CONH2	0.0227596	\N	8	1	0	HU (DAPF)	Bait concentration was adjusted to fit the profile to WT	2023/01/17
BIN1	O00499	513-593	SH3	P551L	his6-MBP-TEVsite-SH3	MICALL1	Q8N3F8	278-292	PxxP_2	\N	PQIPTKPRVPGKLQE	Bio Ado Ado-PQIPTKPRVPGKLQE-CONH2	-0.0927855	\N	8	1	0	HU (DAPF)	Bait concentration was adjusted to fit the profile to WT	2023/01/17
BIN1	O00499	513-593	SH3	P551L	his6-MBP-TEVsite-SH3	MICALL1	Q8N3F8	379-393	PxxP_3	\N	PKKKPAPLPPSSSPG	Bio Ado Ado-PKKKPAPLPPSSSPG-CONH2	0.0175832	\N	8	1	0	HU (DAPF)	Bait concentration was adjusted to fit the profile to WT	2023/01/17
BIN1	O00499	513-593	SH3	P551L	his6-MBP-TEVsite-SH3	MICALL1	Q8N3F8	474-488	PxxP_4	\N	TKKRPAPRAPSASPL	Bio Ado Ado-TKKRPAPRAPSASPL-CONH2	0.0320346	\N	8	1	0	HU (DAPF)	Bait concentration was adjusted to fit the profile to WT	2023/01/17
BIN1	O00499	513-593	SH3	P551L	his6-MBP-TEVsite-SH3	MORC2	Q9Y6X9	620-634	PxxP_1	\N	AVIRNAPSRPPSLPT	Bio Ado Ado-AVIRNAPSRPPSLPT-CONH2	0.00534087	\N	8	1	0	HU (DAPF)	Bait concentration was adjusted to fit the profile to WT	2023/01/17
BIN1	O00499	513-593	SH3	P551L	his6-MBP-TEVsite-SH3	MORC2	Q9Y6X9	665-679	PxxP_2	\N	SRLLQPPEAPRKPAN	Bio Ado Ado-SRLLQPPEAPRKPAN-CONH2	0.00340916	\N	8	1	0	HU (DAPF)	Bait concentration was adjusted to fit the profile to WT	2023/01/17
BIN1	O00499	513-593	SH3	P551L	his6-MBP-TEVsite-SH3	MORC2	Q9Y6X9	725-739	PxxP_3	\N	SPIKLSPATPSRKRS	Bio Ado Ado-SPIKLSPATPSRKRS-CONH2	0.119064	0.00665766	8	2	4.24488	HU (DAPF)	Bait concentration was adjusted to fit the profile to WT	2023/01/17
BIN1	O00499	513-593	SH3	P551L	his6-MBP-TEVsite-SH3	MORF4L1	Q9UBU8	163-177	PxxP_1	\N	GSTSETPQPPRKKRA	Bio Ado Ado-GSTSETPQPPRKKRA-CONH2	0.0269976	\N	8	1	0	HU (DAPF)	Bait concentration was adjusted to fit the profile to WT	2023/01/17
BIN1	O00499	513-593	SH3	P551L	his6-MBP-TEVsite-SH3	MORF4L2	Q15014	47-61	PxxP_1	\N	QQKNLEPALPGRWGG	Bio Ado Ado-QQKNLEPALPGRWGG-CONH2	0.0182796	\N	8	1	0	HU (DAPF)	Bait concentration was adjusted to fit the profile to WT	2023/01/17
BIN1	O00499	513-593	SH3	P551L	his6-MBP-TEVsite-SH3	MORF4L2	Q15014	89-103	PxxP_2	\N	GSTSEAPQPPRKKRA	Bio Ado Ado-GSTSEAPQPPRKKRA-CONH2	0.0384098	\N	8	1	0	HU (DAPF)	Bait concentration was adjusted to fit the profile to WT	2023/01/17
BIN1	O00499	513-593	SH3	P551L	his6-MBP-TEVsite-SH3	MRPS12	O15235	36-50	PxxP_1	\N	MHRLGPPKRPPRKLG	Bio Ado Ado-MHRLGPPKRPPRKLG-CONH2	0.436689	\N	8	1	5.05281	HU (DAPF)	Bait concentration was adjusted to fit the profile to WT	2023/01/17
BIN1	O00499	513-593	SH3	P551L	his6-MBP-TEVsite-SH3	MYBL2	P10244	525-539	PxxP_1	\N	ALEKYGPLKPLPQTP	Bio Ado Ado-ALEKYGPLKPLPQTP-CONH2	-0.0107678	\N	8	1	0	HU (DAPF)	Bait concentration was adjusted to fit the profile to WT	2023/01/17
BIN1	O00499	513-593	SH3	P551L	his6-MBP-TEVsite-SH3	MYBL2	P10244	530-544	PxxP_2	\N	GPLKPLPQTPHLEED	Bio Ado Ado-GPLKPLPQTPHLEED-CONH2	-0.0181639	\N	8	1	0	HU (DAPF)	Bait concentration was adjusted to fit the profile to WT	2023/01/17
BIN1	O00499	513-593	SH3	P551L	his6-MBP-TEVsite-SH3	NCKIPSD	Q9NZQ3	165-179	PxxP_1	\N	LPSSQIPPQPRRAAP	Bio Ado Ado-LPSSQIPPQPRRAAP-CONH2	0.024841	\N	8	1	0	HU (DAPF)	Bait concentration was adjusted to fit the profile to WT	2023/01/17
BIN1	O00499	513-593	SH3	P551L	his6-MBP-TEVsite-SH3	NCKIPSD	Q9NZQ3	173-187	PxxP_2	\N	QPRRAAPTTPPPPVK	Bio Ado Ado-QPRRAAPTTPPPPVK-CONH2	-0.0152373	\N	8	1	0	HU (DAPF)	Bait concentration was adjusted to fit the profile to WT	2023/01/17
BIN1	O00499	513-593	SH3	P551L	his6-MBP-TEVsite-SH3	NCKIPSD	Q9NZQ3	176-190	PxxP_3	\N	RAAPTTPPPPVKRRD	Bio Ado Ado-RAAPTTPPPPVKRRD-CONH2	0.0218011	\N	8	1	0	HU (DAPF)	Bait concentration was adjusted to fit the profile to WT	2023/01/17
BIN1	O00499	513-593	SH3	P551L	his6-MBP-TEVsite-SH3	NCKIPSD	Q9NZQ3	238-252	PxxP_4	\N	SCSPTPPPVPRRGTH	Bio Ado Ado-SCSPTPPPVPRRGTH-CONH2	0.257635	\N	8	1	4.67527	HU (DAPF)	Bait concentration was adjusted to fit the profile to WT	2023/01/17
BIN1	O00499	513-593	SH3	P551L	his6-MBP-TEVsite-SH3	NUP153	P49790	252-266	PxxP_1	\N	SQLGDSPFYPGKTTY	Bio Ado Ado-SQLGDSPFYPGKTTY-CONH2	0.049927	\N	8	1	0	HU (DAPF)	Bait concentration was adjusted to fit the profile to WT	2023/01/17
BIN1	O00499	513-593	SH3	P551L	his6-MBP-TEVsite-SH3	PAN3	Q58A45	105-119	PxxP_1	\N	GGGAGPPPGPKKPDL	Bio Ado Ado-GGGAGPPPGPKKPDL-CONH2	-0.0271873	\N	8	1	0	HU (DAPF)	Bait concentration was adjusted to fit the profile to WT	2023/01/17
BIN1	O00499	513-593	SH3	P551L	his6-MBP-TEVsite-SH3	PDCD6IP	Q8WUM4	746-760	PxxP_1	\N	TMPPTKPQPPARPPP	Bio Ado Ado-TMPPTKPQPPARPPP-CONH2	0.00946858	\N	8	1	0	HU (DAPF)	Bait concentration was adjusted to fit the profile to WT	2023/01/17
BIN1	O00499	513-593	SH3	P551L	his6-MBP-TEVsite-SH3	PDS5A	Q29RF7	1256-1270	PxxP_1	\N	KVDESGPPAPSKPRR	Bio Ado Ado-KVDESGPPAPSKPRR-CONH2	0.0299864	\N	8	1	0	HU (DAPF)	Bait concentration was adjusted to fit the profile to WT	2023/01/17
BIN1	O00499	513-593	SH3	P551L	his6-MBP-TEVsite-SH3	PDS5A	Q29RF7	1259-1273	PxxP_2	\N	ESGPPAPSKPRRGRR	Bio Ado Ado-ESGPPAPSKPRRGRR-CONH2	0.311494	\N	8	1	4.79881	HU (DAPF)	Bait concentration was adjusted to fit the profile to WT	2023/01/17
BIN1	O00499	513-593	SH3	P551L	his6-MBP-TEVsite-SH3	PEX1	O43933	1156-1170	PxxP_1	\N	SMTQDLPGVPGKDQL	Bio Ado Ado-SMTQDLPGVPGKDQL-CONH2	0.0107648	\N	8	1	0	HU (DAPF)	Bait concentration was adjusted to fit the profile to WT	2023/01/17
BIN1	O00499	513-593	SH3	P551L	his6-MBP-TEVsite-SH3	PHACTR4	Q8IZ21	161-175	PxxP_1	\N	ENVPKPPLLPPKRPL	Bio Ado Ado-ENVPKPPLLPPKRPL-CONH2	0.0236524	\N	8	1	0	HU (DAPF)	Bait concentration was adjusted to fit the profile to WT	2023/01/17
BIN1	O00499	513-593	SH3	P551L	his6-MBP-TEVsite-SH3	PHACTR4	Q8IZ21	229-243	PxxP_2	\N	PAPRTLPAAPASTNT	Bio Ado Ado-PAPRTLPAAPASTNT-CONH2	0.0207127	\N	8	1	0	HU (DAPF)	Bait concentration was adjusted to fit the profile to WT	2023/01/17
BIN1	O00499	513-593	SH3	P551L	his6-MBP-TEVsite-SH3	PHACTR4	Q8IZ21	253-267	PxxP_3	\N	VPAKQPPIPPPKPAH	Bio Ado Ado-VPAKQPPIPPPKPAH-CONH2	-0.009727	0.0284848	8	2	0	HU (DAPF)	Bait concentration was adjusted to fit the profile to WT	2023/01/17
BIN1	O00499	513-593	SH3	P551L	his6-MBP-TEVsite-SH3	PHACTR4	Q8IZ21	286-300	PxxP_4	\N	LLSKPSPPLPPKRGI	Bio Ado Ado-LLSKPSPPLPPKRGI-CONH2	0.253788	0.00260183	8	2	4.6659	HU (DAPF)	Bait concentration was adjusted to fit the profile to WT	2023/01/17
BIN1	O00499	513-593	SH3	P551L	his6-MBP-TEVsite-SH3	PHACTR4	Q8IZ21	287-301	PxxP_5	\N	LSKPSPPLPPKRGIP	Bio Ado Ado-LSKPSPPLPPKRGIP-CONH2	0.199608	\N	8	1	4.52291	HU (DAPF)	Bait concentration was adjusted to fit the profile to WT	2023/01/17
BIN1	O00499	513-593	SH3	P551L	his6-MBP-TEVsite-SH3	PHACTR4	Q8IZ21	346-360	PxxP_6	\N	PLPTHIPPEPPRTPP	Bio Ado Ado-PLPTHIPPEPPRTPP-CONH2	-0.0372949	\N	8	1	0	HU (DAPF)	Bait concentration was adjusted to fit the profile to WT	2023/01/17
BIN1	O00499	513-593	SH3	P551L	his6-MBP-TEVsite-SH3	PHACTR4	Q8IZ21	353-367	PxxP_7	\N	PEPPRTPPFPAKTFQ	Bio Ado Ado-PEPPRTPPFPAKTFQ-CONH2	-0.0952835	\N	8	1	0	HU (DAPF)	Bait concentration was adjusted to fit the profile to WT	2023/01/17
BIN1	O00499	513-593	SH3	P551L	his6-MBP-TEVsite-SH3	PHACTR4	Q8IZ21	400-414	PxxP_8	\N	DQNFGEPHIPSRLPP	Bio Ado Ado-DQNFGEPHIPSRLPP-CONH2	-0.022633	\N	8	1	0	HU (DAPF)	Bait concentration was adjusted to fit the profile to WT	2023/01/17
BIN1	O00499	513-593	SH3	P551L	his6-MBP-TEVsite-SH3	PI4K2B	Q8TCG2	1-12	PxxP_1	\N	___MEDPSEPDRLAS	Bio Ado Ado-___MEDPSEPDRLAS-CONH2	-0.0326599	\N	8	1	0	HU (DAPF)	Bait concentration was adjusted to fit the profile to WT	2023/01/17
BIN1	O00499	513-593	SH3	P551L	his6-MBP-TEVsite-SH3	PKMYT1	Q99640	46-60	PxxP_1	\N	GLSRSLPPPPPAKGS	Bio Ado Ado-GLSRSLPPPPPAKGS-CONH2	-0.0086377	\N	8	1	0	HU (DAPF)	Bait concentration was adjusted to fit the profile to WT	2023/01/17
BIN1	O00499	513-593	SH3	P551L	his6-MBP-TEVsite-SH3	PKMYT1	Q99640	47-61	PxxP_2	\N	LSRSLPPPPPAKGSI	Bio Ado Ado-LSRSLPPPPPAKGSI-CONH2	-0.0138925	\N	8	1	0	HU (DAPF)	Bait concentration was adjusted to fit the profile to WT	2023/01/17
BIN1	O00499	513-593	SH3	P551L	his6-MBP-TEVsite-SH3	POM121	Q96HA1	140-154	PxxP_1	\N	YLGKPGPPQPAAAPE	Bio Ado Ado-YLGKPGPPQPAAAPE-CONH2	0.0128428	\N	8	1	0	HU (DAPF)	Bait concentration was adjusted to fit the profile to WT	2023/01/17
BIN1	O00499	513-593	SH3	P551L	his6-MBP-TEVsite-SH3	POM121	Q96HA1	161-175	PxxP_2	\N	RPGRRPPARPAPRSP	Bio Ado Ado-RPGRRPPARPAPRSP-CONH2	0.0791633	\N	8	1	4.04257	HU (DAPF)	Bait concentration was adjusted to fit the profile to WT	2023/01/17
BIN1	O00499	513-593	SH3	P551L	his6-MBP-TEVsite-SH3	POM121	Q96HA1	166-180	PxxP_3	\N	PPARPAPRSPPPRSP	Bio Ado Ado-PPARPAPRSPPPRSP-CONH2	0.0605485	\N	8	1	3.91477	HU (DAPF)	Bait concentration was adjusted to fit the profile to WT	2023/01/17
BIN1	O00499	513-593	SH3	P551L	his6-MBP-TEVsite-SH3	POM121	Q96HA1	180-194	PxxP_4	\N	PPPRSPPPSPPTHRA	Bio Ado Ado-PPPRSPPPSPPTHRA-CONH2	0.0238423	\N	8	1	0	HU (DAPF)	Bait concentration was adjusted to fit the profile to WT	2023/01/17
BIN1	O00499	513-593	SH3	P551L	his6-MBP-TEVsite-SH3	POM121	Q96HA1	442-456	PxxP_5	\N	SSRSQTPERPAKKIR	Bio Ado Ado-SSRSQTPERPAKKIR-CONH2	0.0693942	\N	8	1	3.97937	HU (DAPF)	Bait concentration was adjusted to fit the profile to WT	2023/01/17
BIN1	O00499	513-593	SH3	P551L	his6-MBP-TEVsite-SH3	POM121	Q96HA1	737-751	PxxP_6	\N	KSEKEGPTPPGPSVT	Bio Ado Ado-KSEKEGPTPPGPSVT-CONH2	-0.032172	\N	8	1	0	HU (DAPF)	Bait concentration was adjusted to fit the profile to WT	2023/01/17
BIN1	O00499	513-593	SH3	P551L	his6-MBP-TEVsite-SH3	POM121C	A8CG34	127-141	PxxP_1	\N	YLGKPGPPQPAPAPE	Bio Ado Ado-YLGKPGPPQPAPAPE-CONH2	0.00694938	\N	8	1	0	HU (DAPF)	Bait concentration was adjusted to fit the profile to WT	2023/01/17
BIN1	O00499	513-593	SH3	P551L	his6-MBP-TEVsite-SH3	POM121C	A8CG34	148-162	PxxP_2	\N	RPGRRPPARPAPRST	Bio Ado Ado-RPGRRPPARPAPRST-CONH2	0.0980645	\N	8	1	4.14731	HU (DAPF)	Bait concentration was adjusted to fit the profile to WT	2023/01/17
BIN1	O00499	513-593	SH3	P551L	his6-MBP-TEVsite-SH3	POM121C	A8CG34	419-433	PxxP_3	\N	SSRSQTPERPAKKIR	Bio Ado Ado-SSRSQTPERPAKKIR-CONH2	0.0361734	\N	8	1	0	HU (DAPF)	Bait concentration was adjusted to fit the profile to WT	2023/01/17
BIN1	O00499	513-593	SH3	P551L	his6-MBP-TEVsite-SH3	PPP1CA	P62136	312-326	PxxP_1	\N	LNPGGRPITPPRNSA	Bio Ado Ado-LNPGGRPITPPRNSA-CONH2	0.0804565	\N	8	1	4.05041	HU (DAPF)	Bait concentration was adjusted to fit the profile to WT	2023/01/17
BIN1	O00499	513-593	SH3	P551L	his6-MBP-TEVsite-SH3	PPP1CB	P62140	308-322	PxxP_1	\N	GLNSGRPVTPPRTAN	Bio Ado Ado-GLNSGRPVTPPRTAN-CONH2	0.0436589	\N	8	1	0	HU (DAPF)	Bait concentration was adjusted to fit the profile to WT	2023/01/17
BIN1	O00499	513-593	SH3	P551L	his6-MBP-TEVsite-SH3	PPP1CC	P36873	303-317	PxxP_1	\N	KPNATRPVTPPRGMI	Bio Ado Ado-KPNATRPVTPPRGMI-CONH2	0.0686939	\N	8	1	3.97454	HU (DAPF)	Bait concentration was adjusted to fit the profile to WT	2023/01/17
BIN1	O00499	513-593	SH3	P551L	his6-MBP-TEVsite-SH3	PPP1R10	Q96QC0	498-512	PxxP_1	\N	FLNKESPHEPDPEPY	Bio Ado Ado-FLNKESPHEPDPEPY-CONH2	0.0467267	\N	8	1	0	HU (DAPF)	Bait concentration was adjusted to fit the profile to WT	2023/01/17
BIN1	O00499	513-593	SH3	P551L	his6-MBP-TEVsite-SH3	PPP1R10	Q96QC0	663-677	PxxP_2	\N	GPRLLGPPPPPRGGD	Bio Ado Ado-GPRLLGPPPPPRGGD-CONH2	-0.00286072	\N	8	1	0	HU (DAPF)	Bait concentration was adjusted to fit the profile to WT	2023/01/17
BIN1	O00499	513-593	SH3	P551L	his6-MBP-TEVsite-SH3	PPP1R10	Q96QC0	677-691	PxxP_3	\N	DPFWDGPGDPMRGGP	Bio Ado Ado-DPFWDGPGDPMRGGP-CONH2	-0.0391067	\N	8	1	0	HU (DAPF)	Bait concentration was adjusted to fit the profile to WT	2023/01/17
BIN1	O00499	513-593	SH3	P551L	his6-MBP-TEVsite-SH3	PPP1R10	Q96QC0	712-726	PxxP_4	\N	GNEPPPPPPPFRGAR	Bio Ado Ado-GNEPPPPPPPFRGAR-CONH2	0.00677893	\N	8	1	0	HU (DAPF)	Bait concentration was adjusted to fit the profile to WT	2023/01/17
BIN1	O00499	513-593	SH3	P551L	his6-MBP-TEVsite-SH3	PPP1R8	Q12972	97-111	PxxP_1	\N	GHIRLEPHKPQQIPI	Bio Ado Ado-GHIRLEPHKPQQIPI-CONH2	-0.00373532	\N	8	1	0	HU (DAPF)	Bait concentration was adjusted to fit the profile to WT	2023/01/17
BIN1	O00499	513-593	SH3	P551L	his6-MBP-TEVsite-SH3	PRC1	O43663	462-476	PxxP_1	\N	MLYGSAPRTPSKRRG	Bio Ado Ado-MLYGSAPRTPSKRRG-CONH2	0.032345	\N	8	1	0	HU (DAPF)	Bait concentration was adjusted to fit the profile to WT	2023/01/17
BIN1	O00499	513-593	SH3	P551L	his6-MBP-TEVsite-SH3	PRC1	O43663	473-487	PxxP_2	\N	KRRGLAPNTPGKARK	Bio Ado Ado-KRRGLAPNTPGKARK-CONH2	0.0277063	\N	8	1	0	HU (DAPF)	Bait concentration was adjusted to fit the profile to WT	2023/01/17
BIN1	O00499	513-593	SH3	P551L	his6-MBP-TEVsite-SH3	PRR12	Q9ULL5	1215-1229	PxxP_1	\N	GGTRLEPLKPLKIKL	Bio Ado Ado-GGTRLEPLKPLKIKL-CONH2	-0.025373	0.00327565	8	2	0	HU (DAPF)	Bait concentration was adjusted to fit the profile to WT	2023/01/17
BIN1	O00499	513-593	SH3	P551L	his6-MBP-TEVsite-SH3	PRR12	Q9ULL5	13-27	PxxP_2	BAA86519.1	HPVRPPPPPPPPMPL	Bio Ado Ado-HPVRPPPPPPPPMPL-CONH2	0.0252929	\N	8	1	0	HU (DAPF)	Bait concentration was adjusted to fit the profile to WT	2023/01/17
BIN1	O00499	513-593	SH3	P551L	his6-MBP-TEVsite-SH3	PRR12	Q9ULL5	1300-1314	PxxP_3	\N	QAGLTPPLSPPKSVP	Bio Ado Ado-QAGLTPPLSPPKSVP-CONH2	-0.0143798	\N	8	1	0	HU (DAPF)	Bait concentration was adjusted to fit the profile to WT	2023/01/17
BIN1	O00499	513-593	SH3	P551L	his6-MBP-TEVsite-SH3	PRR12	Q9ULL5	1453-1467	PxxP_4	\N	LEEKPPPTPPPAPTP	Bio Ado Ado-LEEKPPPTPPPAPTP-CONH2	-0.0254593	\N	8	1	0	HU (DAPF)	Bait concentration was adjusted to fit the profile to WT	2023/01/17
BIN1	O00499	513-593	SH3	P551L	his6-MBP-TEVsite-SH3	PRR12	Q9ULL5	1664-1678	PxxP_5	\N	RKPWHRPPVPVRRSG	Bio Ado Ado-RKPWHRPPVPVRRSG-CONH2	0.462768	\N	8	1	5.1029	HU (DAPF)	Bait concentration was adjusted to fit the profile to WT	2023/01/17
BIN1	O00499	513-593	SH3	P551L	his6-MBP-TEVsite-SH3	PRR12	Q9ULL5	1691-1705	PxxP_6	\N	APPPKAPAPPPKPET	Bio Ado Ado-APPPKAPAPPPKPET-CONH2	-0.0080228	\N	8	1	0	HU (DAPF)	Bait concentration was adjusted to fit the profile to WT	2023/01/17
BIN1	O00499	513-593	SH3	P551L	his6-MBP-TEVsite-SH3	PRR12	Q9ULL5	1697-1711	PxxP_7	\N	PAPPPKPETPEKTTS	Bio Ado Ado-PAPPPKPETPEKTTS-CONH2	-0.0161153	\N	8	1	0	HU (DAPF)	Bait concentration was adjusted to fit the profile to WT	2023/01/17
BIN1	O00499	513-593	SH3	P551L	his6-MBP-TEVsite-SH3	PRR12	Q9ULL5	1720-1734	PxxP_8	\N	ETAMPEPPAPEKPSL	Bio Ado Ado-ETAMPEPPAPEKPSL-CONH2	-0.0128674	\N	8	1	0	HU (DAPF)	Bait concentration was adjusted to fit the profile to WT	2023/01/17
BIN1	O00499	513-593	SH3	P551L	his6-MBP-TEVsite-SH3	PRR12	Q9ULL5	1143-1157	PxxP_9	\N	CPPNPGPDGPRRRGR	Bio Ado Ado-CPPNPGPDGPRRRGR-CONH2	0.0543422	\N	8	1	3.86405	HU (DAPF)	Bait concentration was adjusted to fit the profile to WT	2023/01/17
BIN1	O00499	513-593	SH3	P551L	his6-MBP-TEVsite-SH3	PRR12	Q9ULL5	1161-1175	PxxP_10	\N	KAKRDGPPRPRGRPR	Bio Ado Ado-KAKRDGPPRPRGRPR-CONH2	0.179992	\N	8	1	4.46452	HU (DAPF)	Bait concentration was adjusted to fit the profile to WT	2023/01/17
BIN1	O00499	513-593	SH3	P551L	his6-MBP-TEVsite-SH3	PRR12	Q9ULL5	1309-1323	PxxP_11	\N	PPKSVPPSVPARGLQ	Bio Ado Ado-PPKSVPPSVPARGLQ-CONH2	0.0953457	\N	8	1	4.1334	HU (DAPF)	Bait concentration was adjusted to fit the profile to WT	2023/01/17
BIN1	O00499	513-593	SH3	P551L	his6-MBP-TEVsite-SH3	PRR12	Q9ULL5	5-19	PxxP_12	BAA86519.1	PGVPPGPPHPVRPPP	Bio Ado Ado-PGVPPGPPHPVRPPP-CONH2	0.00564087	\N	8	1	0	HU (DAPF)	Bait concentration was adjusted to fit the profile to WT	2023/01/17
BIN1	O00499	513-593	SH3	P551L	his6-MBP-TEVsite-SH3	PRR12	Q9ULL5	986-1000	PxxP_13	\N	AYDPYGPYCPGRASG	Bio Ado Ado-AYDPYGPYCPGRASG-CONH2	-0.00786847	\N	8	1	0	HU (DAPF)	Bait concentration was adjusted to fit the profile to WT	2023/01/17
BIN1	O00499	513-593	SH3	P551L	his6-MBP-TEVsite-SH3	PRRC2A	P48634	907-921	PxxP_18	\N	GSGGQGPPPPRRESR	Bio E E Ado Ado-GSGGQGPPPPRRESR-CONH2	8.13844e-05	\N	8	1	0	HU (DAPF)	Bait concentration was adjusted to fit the profile to WT	2023/01/17
BIN1	O00499	513-593	SH3	P551L	his6-MBP-TEVsite-SH3	PRRC2B	Q5JSZ5	251-265	PxxP_1	\N	KDPSLRPAQPVRKGA	Bio Ado Ado-KDPSLRPAQPVRKGA-CONH2	-0.00244534	\N	8	1	0	HU (DAPF)	Bait concentration was adjusted to fit the profile to WT	2023/01/17
BIN1	O00499	513-593	SH3	P551L	his6-MBP-TEVsite-SH3	PRRC2B	Q5JSZ5	306-320	PxxP_2	\N	PQLRLEPRVPFRQFQ	Bio Ado Ado-PQLRLEPRVPFRQFQ-CONH2	0.0159851	0.00700434	8	2	0	HU (DAPF)	Bait concentration was adjusted to fit the profile to WT	2023/01/17
BIN1	O00499	513-593	SH3	P551L	his6-MBP-TEVsite-SH3	PRRC2B	Q5JSZ5	330-344	PxxP_3	\N	RLGLSRPLRPLRQLV	Bio Ado Ado-RLGLSRPLRPLRQLV-CONH2	0.101781	\N	8	1	4.1658	HU (DAPF)	Bait concentration was adjusted to fit the profile to WT	2023/01/17
BIN1	O00499	513-593	SH3	P551L	his6-MBP-TEVsite-SH3	PRRC2B	Q5JSZ5	445-459	PxxP_4	\N	VRKAPDPQPPPRKLH	Bio Ado Ado-VRKAPDPQPPPRKLH-CONH2	0.295023	\N	8	1	4.76236	HU (DAPF)	Bait concentration was adjusted to fit the profile to WT	2023/01/17
BIN1	O00499	513-593	SH3	P551L	his6-MBP-TEVsite-SH3	PRRC2B	Q5JSZ5	548-562	PxxP_5	\N	QAEKEVPWSPSAEKA	Bio Ado Ado-QAEKEVPWSPSAEKA-CONH2	-0.0168606	\N	8	1	0	HU (DAPF)	Bait concentration was adjusted to fit the profile to WT	2023/01/17
BIN1	O00499	513-593	SH3	P551L	his6-MBP-TEVsite-SH3	PRRC2B	Q5JSZ5	570-584	PxxP_6	\N	AVHKGSPEFPAQETP	Bio Ado Ado-AVHKGSPEFPAQETP-CONH2	0.00999261	\N	8	1	0	HU (DAPF)	Bait concentration was adjusted to fit the profile to WT	2023/01/17
BIN1	O00499	513-593	SH3	P551L	his6-MBP-TEVsite-SH3	PRRC2B	Q5JSZ5	647-661	PxxP_7	\N	QPVYPPPSHPQRTFY	Bio Ado Ado-QPVYPPPSHPQRTFY-CONH2	0.0240521	\N	8	1	0	HU (DAPF)	Bait concentration was adjusted to fit the profile to WT	2023/01/17
BIN1	O00499	513-593	SH3	P551L	his6-MBP-TEVsite-SH3	PRRC2B	Q5JSZ5	848-862	PxxP_8	\N	QNLRCSPLEPDFVPD	Bio Ado Ado-QNLRCSPLEPDFVPD-CONH2	0.00316378	\N	8	1	0	HU (DAPF)	Bait concentration was adjusted to fit the profile to WT	2023/01/17
BIN1	O00499	513-593	SH3	P551L	his6-MBP-TEVsite-SH3	PRRC2C	Q9Y520	1419-1433	PxxP_3	\N	RPRRQRPTRPPRQDK	Bio E E Ado Ado-RPRRQRPTRPPRQDK-CONH2	0.347967	\N	8	1	4.8763	HU (DAPF)	Bait concentration was adjusted to fit the profile to WT	2023/01/17
BIN1	O00499	513-593	SH3	P551L	his6-MBP-TEVsite-SH3	PTK2B	Q14289	708-722	PxxP_1	\N	TAFQEPPPKPSRPKY	Bio Ado Ado-TAFQEPPPKPSRPKY-CONH2	0.0364404	\N	8	1	0	HU (DAPF)	Bait concentration was adjusted to fit the profile to WT	2023/01/17
BIN1	O00499	513-593	SH3	P551L	his6-MBP-TEVsite-SH3	PTK2B	Q14289	834-848	PxxP_2	\N	YMNDKSPLTPEKEVG	Bio Ado Ado-YMNDKSPLTPEKEVG-CONH2	0.0241101	\N	8	1	0	HU (DAPF)	Bait concentration was adjusted to fit the profile to WT	2023/01/17
BIN1	O00499	513-593	SH3	P551L	his6-MBP-TEVsite-SH3	PTK2B	Q14289	850-864	PxxP_3	\N	LEFTGPPQKPPRLGA	Bio Ado Ado-LEFTGPPQKPPRLGA-CONH2	0.099002	\N	8	1	4.15203	HU (DAPF)	Bait concentration was adjusted to fit the profile to WT	2023/01/17
BIN1	O00499	513-593	SH3	P551L	his6-MBP-TEVsite-SH3	RACGAP1	Q9H0H5	188-202	PxxP_1	\N	RQFVDGPPGPVKKTR	Bio Ado Ado-RQFVDGPPGPVKKTR-CONH2	0.0134726	\N	8	1	0	HU (DAPF)	Bait concentration was adjusted to fit the profile to WT	2023/01/17
BIN1	O00499	513-593	SH3	P551L	his6-MBP-TEVsite-SH3	RASAL3	Q86YV0	91-105	PxxP_1	\N	GRHKNPPPEPDPEPE	Bio Ado Ado-GRHKNPPPEPDPEPE-CONH2	-0.00110139	\N	8	1	0	HU (DAPF)	Bait concentration was adjusted to fit the profile to WT	2023/01/17
BIN1	O00499	513-593	SH3	P551L	his6-MBP-TEVsite-SH3	RAVER1	Q8IY67	420-434	PxxP_1	\N	AGGGLPPELPPRRGK	Bio Ado Ado-AGGGLPPELPPRRGK-CONH2	0.330608	\N	8	1	4.83991	HU (DAPF)	Bait concentration was adjusted to fit the profile to WT	2023/01/17
BIN1	O00499	513-593	SH3	P551L	his6-MBP-TEVsite-SH3	RAVER1	Q8IY67	431-445	PxxP_2	\N	RRGKPPPLLPSVLGP	Bio Ado Ado-RRGKPPPLLPSVLGP-CONH2	0.0531908	\N	8	1	3.85406	HU (DAPF)	Bait concentration was adjusted to fit the profile to WT	2023/01/17
BIN1	O00499	513-593	SH3	P551L	his6-MBP-TEVsite-SH3	RBBP6	Q7Z6E9	331-345	PxxP_1	\N	RLRKQLPPPPPPIPP	Bio Ado Ado-RLRKQLPPPPPPIPP-CONH2	0.0325585	\N	8	1	0	HU (DAPF)	Bait concentration was adjusted to fit the profile to WT	2023/01/17
BIN1	O00499	513-593	SH3	P551L	his6-MBP-TEVsite-SH3	RBBP6	Q7Z6E9	336-350	PxxP_2	\N	LPPPPPPIPPPRPLI	Bio Ado Ado-LPPPPPPIPPPRPLI-CONH2	0.00759013	\N	8	1	0	HU (DAPF)	Bait concentration was adjusted to fit the profile to WT	2023/01/17
BIN1	O00499	513-593	SH3	P551L	his6-MBP-TEVsite-SH3	RBBP6	Q7Z6E9	725-739	PxxP_3	\N	RSYSRSPPYPRRGRG	Bio Ado Ado-RSYSRSPPYPRRGRG-CONH2	0.249914	\N	8	1	4.65638	HU (DAPF)	Bait concentration was adjusted to fit the profile to WT	2023/01/17
BIN1	O00499	513-593	SH3	P551L	his6-MBP-TEVsite-SH3	RBM15	Q96T37	311-325	PxxP_1	\N	ALGRLPPPPPPPLPR	Bio Ado Ado-ALGRLPPPPPPPLPR-CONH2	0.0760326	\N	8	1	4.02312	HU (DAPF)	Bait concentration was adjusted to fit the profile to WT	2023/01/17
BIN1	O00499	513-593	SH3	P551L	his6-MBP-TEVsite-SH3	RBM15	Q96T37	583-597	PxxP_2	\N	DSDWVPPPPPVRERS	Bio Ado Ado-DSDWVPPPPPVRERS-CONH2	0.00242875	\N	8	1	0	HU (DAPF)	Bait concentration was adjusted to fit the profile to WT	2023/01/17
BIN1	O00499	513-593	SH3	P551L	his6-MBP-TEVsite-SH3	RBM15B	Q8NDT2	108-122	PxxP_1	\N	MSPRASPLPPPPPPP	Bio Ado Ado-MSPRASPLPPPPPPP-CONH2	0.0068873	\N	8	1	0	HU (DAPF)	Bait concentration was adjusted to fit the profile to WT	2023/01/17
BIN1	O00499	513-593	SH3	P551L	his6-MBP-TEVsite-SH3	RBM33	Q96EV2	477-491	PxxP_1	\N	LEQRSPPPPPPPPTL	Bio Ado Ado-LEQRSPPPPPPPPTL-CONH2	-0.0168693	\N	8	1	0	HU (DAPF)	Bait concentration was adjusted to fit the profile to WT	2023/01/17
BIN1	O00499	513-593	SH3	P551L	his6-MBP-TEVsite-SH3	RBM33	Q96EV2	521-535	PxxP_2	\N	VFPRERPVRPALQPP	Bio Ado Ado-VFPRERPVRPALQPP-CONH2	0.0189216	\N	8	1	0	HU (DAPF)	Bait concentration was adjusted to fit the profile to WT	2023/01/17
BIN1	O00499	513-593	SH3	P551L	his6-MBP-TEVsite-SH3	RBM33	Q96EV2	547-561	PxxP_3	\N	GSATTRPFIPPRQPF	Bio Ado Ado-GSATTRPFIPPRQPF-CONH2	0.0791365	\N	8	1	4.04241	HU (DAPF)	Bait concentration was adjusted to fit the profile to WT	2023/01/17
BIN1	O00499	513-593	SH3	P551L	his6-MBP-TEVsite-SH3	RBM33	Q96EV2	706-720	PxxP_4	\N	SNLRELPIAPSHVIE	Bio Ado Ado-SNLRELPIAPSHVIE-CONH2	0.00883386	\N	8	1	0	HU (DAPF)	Bait concentration was adjusted to fit the profile to WT	2023/01/17
BIN1	O00499	513-593	SH3	P551L	his6-MBP-TEVsite-SH3	RBM33	Q96EV2	757-771	PxxP_5	\N	TEVKVKPASPVAQPK	Bio Ado Ado-TEVKVKPASPVAQPK-CONH2	0.0131023	\N	8	1	0	HU (DAPF)	Bait concentration was adjusted to fit the profile to WT	2023/01/17
BIN1	O00499	513-593	SH3	P551L	his6-MBP-TEVsite-SH3	RBM33	Q96EV2	926-940	PxxP_6	\N	PLHKVLPIKPADVEE	Bio Ado Ado-PLHKVLPIKPADVEE-CONH2	0.0402077	\N	8	1	0	HU (DAPF)	Bait concentration was adjusted to fit the profile to WT	2023/01/17
BIN1	O00499	513-593	SH3	P551L	his6-MBP-TEVsite-SH3	RBMX	P38159	161-175	PxxP_1	\N	PPKRSAPSGPVRSSS	Bio Ado Ado-PPKRSAPSGPVRSSS-CONH2	-0.0176539	0.0264847	8	2	0	HU (DAPF)	Bait concentration was adjusted to fit the profile to WT	2023/01/17
BIN1	O00499	513-593	SH3	P551L	his6-MBP-TEVsite-SH3	RBMX	P38159	90-104	PxxP_2	\N	ESGRRGPPPPPRSRG	Bio Ado Ado-ESGRRGPPPPPRSRG-CONH2	0.229975	0.00525641	8	2	4.60582	HU (DAPF)	Bait concentration was adjusted to fit the profile to WT	2023/01/17
BIN1	O00499	513-593	SH3	P551L	his6-MBP-TEVsite-SH3	RBMX	P38159	91-105	PxxP_3	\N	SGRRGPPPPPRSRGP	Bio Ado Ado-SGRRGPPPPPRSRGP-CONH2	0.217493	\N	8	1	4.5727	HU (DAPF)	Bait concentration was adjusted to fit the profile to WT	2023/01/17
BIN1	O00499	513-593	SH3	P551L	his6-MBP-TEVsite-SH3	REEP4	Q9H6H4	202-216	PxxP_1	\N	SDTEAVPRAPARPRE	Bio Ado Ado-SDTEAVPRAPARPRE-CONH2	0.0205301	\N	8	1	0	HU (DAPF)	Bait concentration was adjusted to fit the profile to WT	2023/01/17
BIN1	O00499	513-593	SH3	P551L	his6-MBP-TEVsite-SH3	RNF25	Q96BH1	333-347	PxxP_1	\N	QKAMLDPPKPSRGPW	Bio Ado Ado-QKAMLDPPKPSRGPW-CONH2	0.0172092	\N	8	1	0	HU (DAPF)	Bait concentration was adjusted to fit the profile to WT	2023/01/17
BIN1	O00499	513-593	SH3	P551L	his6-MBP-TEVsite-SH3	RNF25	Q96BH1	369-383	PxxP_2	\N	TQELPPPEGPLKEPM	Bio Ado Ado-TQELPPPEGPLKEPM-CONH2	-0.00131135	\N	8	1	0	HU (DAPF)	Bait concentration was adjusted to fit the profile to WT	2023/01/17
BIN1	O00499	513-593	SH3	P551L	his6-MBP-TEVsite-SH3	RNPS1	Q15287	237-251	PxxP_1	\N	AVLAPWPRPPPRRFS	Bio Ado Ado-AVLAPWPRPPPRRFS-CONH2	0.493399	\N	8	1	5.16135	HU (DAPF)	Bait concentration was adjusted to fit the profile to WT	2023/01/17
BIN1	O00499	513-593	SH3	P551L	his6-MBP-TEVsite-SH3	RNPS1	Q15287	252-266	PxxP_2	\N	PPRRMLPPPPMWRRS	Bio Ado Ado-PPRRMLPPPPMWRRS-CONH2	0.214635	\N	8	1	4.56494	HU (DAPF)	Bait concentration was adjusted to fit the profile to WT	2023/01/17
BIN1	O00499	513-593	SH3	P551L	his6-MBP-TEVsite-SH3	RPS6KA5	O75582	270-284	PxxP_1	\N	RILKSEPPYPQEMSA	Bio Ado Ado-RILKSEPPYPQEMSA-CONH2	0.0146507	\N	8	1	0	HU (DAPF)	Bait concentration was adjusted to fit the profile to WT	2023/01/17
BIN1	O00499	513-593	SH3	P551L	his6-MBP-TEVsite-SH3	RSPRY1	Q96DX4	71-85	PxxP_1	\N	ADTRSQPRDPVRPPR	Bio Ado Ado-ADTRSQPRDPVRPPR-CONH2	0.142942	0.0287104	8	2	4.33972	HU (DAPF)	Bait concentration was adjusted to fit the profile to WT	2023/01/17
BIN1	O00499	513-593	SH3	P551L	his6-MBP-TEVsite-SH3	RSPRY1	Q96DX4	74-88	PxxP_2	\N	RSQPRDPVRPPRRGR	Bio Ado Ado-RSQPRDPVRPPRRGR-CONH2	0.598177	\N	8	1	5.36359	HU (DAPF)	Bait concentration was adjusted to fit the profile to WT	2023/01/17
BIN1	O00499	513-593	SH3	P551L	his6-MBP-TEVsite-SH3	RSPRY1	Q96DX4	84-98	PxxP_3	\N	PRRGRGPHEPRRKKQ	Bio Ado Ado-PRRGRGPHEPRRKKQ-CONH2	0.0475316	\N	8	1	0	HU (DAPF)	Bait concentration was adjusted to fit the profile to WT	2023/01/17
BIN1	O00499	513-593	SH3	P551L	his6-MBP-TEVsite-SH3	RUNX1	Q01196	167-181	PxxP_4	\N	KITVDGPREPRRHRQ	Bio Ado Ado-KITVDGPREPRRHRQ-CONH2	-0.00405274	\N	8	1	0	HU (DAPF)	Bait concentration was adjusted to fit the profile to WT	2023/01/17
BIN1	O00499	513-593	SH3	P551L	his6-MBP-TEVsite-SH3	RUNX1	Q01196	207-221	PxxP_5	\N	TAMRVSPHHPAPTPN	Bio Ado Ado-TAMRVSPHHPAPTPN-CONH2	0.00406624	\N	8	1	0	HU (DAPF)	Bait concentration was adjusted to fit the profile to WT	2023/01/17
BIN1	O00499	513-593	SH3	P551L	his6-MBP-TEVsite-SH3	RUNX1	Q01196	268-282	PxxP_6	\N	SVHPATPISPGRASG	Bio Ado Ado-SVHPATPISPGRASG-CONH2	-0.0173382	\N	8	1	0	HU (DAPF)	Bait concentration was adjusted to fit the profile to WT	2023/01/17
BIN1	O00499	513-593	SH3	P551L	his6-MBP-TEVsite-SH3	RUNX1	Q01196	304-318	PxxP_7	\N	SDPRQFPALPSISDP	Bio Ado Ado-SDPRQFPALPSISDP-CONH2	0.0478759	\N	8	1	0	HU (DAPF)	Bait concentration was adjusted to fit the profile to WT	2023/01/17
BIN1	O00499	513-593	SH3	P551L	his6-MBP-TEVsite-SH3	RXRB	P28702	3-17	PxxP_1	\N	WAARPPFLPQRHAAG	Bio Ado Ado-WAARPPFLPQRHAAG-CONH2	0.0272938	\N	8	1	0	HU (DAPF)	Bait concentration was adjusted to fit the profile to WT	2023/01/17
BIN1	O00499	513-593	SH3	P551L	his6-MBP-TEVsite-SH3	SAMD1	Q6SPF0	102-116	PxxP_1	\N	PRRGATPPAPPRAPR	Bio Ado Ado-PRRGATPPAPPRAPR-CONH2	0.253014	\N	8	1	4.66401	HU (DAPF)	Bait concentration was adjusted to fit the profile to WT	2023/01/17
BIN1	O00499	513-593	SH3	P551L	his6-MBP-TEVsite-SH3	SAMD1	Q6SPF0	187-201	PxxP_2	\N	PPAVAPPAGPRRAPP	Bio Ado Ado-PPAVAPPAGPRRAPP-CONH2	-0.00757842	\N	8	1	0	HU (DAPF)	Bait concentration was adjusted to fit the profile to WT	2023/01/17
BIN1	O00499	513-593	SH3	P551L	his6-MBP-TEVsite-SH3	SAMD1	Q6SPF0	204-218	PxxP_3	\N	VAAREPPLPPPPQPP	Bio Ado Ado-VAAREPPLPPPPQPP-CONH2	-0.0210696	\N	8	1	0	HU (DAPF)	Bait concentration was adjusted to fit the profile to WT	2023/01/17
BIN1	O00499	513-593	SH3	P551L	his6-MBP-TEVsite-SH3	SAMD1	Q6SPF0	424-438	PxxP_4	\N	DSPSPVPLPPGKPAL	Bio Ado Ado-DSPSPVPLPPGKPAL-CONH2	0.0247982	\N	8	1	0	HU (DAPF)	Bait concentration was adjusted to fit the profile to WT	2023/01/17
BIN1	O00499	513-593	SH3	P551L	his6-MBP-TEVsite-SH3	SAMD1	Q6SPF0	450-464	PxxP_5	\N	PGRKEKPSDPVEWTV	Bio Ado Ado-PGRKEKPSDPVEWTV-CONH2	-0.00596176	\N	8	1	0	HU (DAPF)	Bait concentration was adjusted to fit the profile to WT	2023/01/17
BIN1	O00499	513-593	SH3	P551L	his6-MBP-TEVsite-SH3	SBF1	O95248	1029-1043	PxxP_1	\N	LGSAHTPGRPPRVTK	Bio Ado Ado-LGSAHTPGRPPRVTK-CONH2	0.0540657	\N	8	1	3.86167	HU (DAPF)	Bait concentration was adjusted to fit the profile to WT	2023/01/17
BIN1	O00499	513-593	SH3	P551L	his6-MBP-TEVsite-SH3	SCML2	Q9UQR0	158-172	PxxP_1	\N	TLFKKEPPKPPLNNF	Bio Ado Ado-TLFKKEPPKPPLNNF-CONH2	0.0275884	\N	8	1	0	HU (DAPF)	Bait concentration was adjusted to fit the profile to WT	2023/01/17
BIN1	O00499	513-593	SH3	P551L	his6-MBP-TEVsite-SH3	SCML2	Q9UQR0	159-173	PxxP_2	\N	LFKKEPPKPPLNNFK	Bio Ado Ado-LFKKEPPKPPLNNFK-CONH2	0.0200802	\N	8	1	0	HU (DAPF)	Bait concentration was adjusted to fit the profile to WT	2023/01/17
BIN1	O00499	513-593	SH3	P551L	his6-MBP-TEVsite-SH3	SCML2	Q9UQR0	282-296	PxxP_3	\N	RSSRIKPPGPTAVPK	Bio Ado Ado-RSSRIKPPGPTAVPK-CONH2	0.0285217	\N	8	1	0	HU (DAPF)	Bait concentration was adjusted to fit the profile to WT	2023/01/17
BIN1	O00499	513-593	SH3	P551L	his6-MBP-TEVsite-SH3	SH3KBP1	Q96B97	390-404	PxxP_2	\N	LQKPSVPAIPPKKPR	Bio E E Ado Ado-LQKPSVPAIPPKKPR-CONH2	0.00105703	\N	8	1	0	HU (DAPF)	Bait concentration was adjusted to fit the profile to WT	2023/01/17
BIN1	O00499	513-593	SH3	P551L	his6-MBP-TEVsite-SH3	SHKBP1	Q8TBC3	642-656	PxxP_1	\N	SGHRGSPSPPQAEAR	Bio Ado Ado-SGHRGSPSPPQAEAR-CONH2	0.0426644	\N	8	1	0	HU (DAPF)	Bait concentration was adjusted to fit the profile to WT	2023/01/17
BIN1	O00499	513-593	SH3	P551L	his6-MBP-TEVsite-SH3	SHKBP1	Q8TBC3	688-702	PxxP_2	\N	SSGLGTPLTPPKMKL	Bio Ado Ado-SSGLGTPLTPPKMKL-CONH2	-0.0105943	\N	8	1	0	HU (DAPF)	Bait concentration was adjusted to fit the profile to WT	2023/01/17
BIN1	O00499	513-593	SH3	P551L	his6-MBP-TEVsite-SH3	SMC5	Q8IY18	15-29	PxxP_1	\N	PSKRALPRDPSSEVP	Bio Ado Ado-PSKRALPRDPSSEVP-CONH2	-0.0393222	\N	8	1	0	HU (DAPF)	Bait concentration was adjusted to fit the profile to WT	2023/01/17
BIN1	O00499	513-593	SH3	P551L	his6-MBP-TEVsite-SH3	SMCHD1	A6NHR9	1977-1991	PxxP_2	\N	VETTDCPVPPKRMRR	Bio E E Ado Ado-VETTDCPVPPKRMRR-CONH2	0.308114	\N	8	1	4.79141	HU (DAPF)	Bait concentration was adjusted to fit the profile to WT	2023/01/17
BIN1	O00499	513-593	SH3	P551L	his6-MBP-TEVsite-SH3	SPAST	Q9UBP0	36-50	PxxP_1	\N	AGPAPPPESPHKRNL	Bio Ado Ado-AGPAPPPESPHKRNL-CONH2	-0.0136444	\N	8	1	0	HU (DAPF)	Bait concentration was adjusted to fit the profile to WT	2023/01/17
BIN1	O00499	513-593	SH3	P551L	his6-MBP-TEVsite-SH3	SRRM1	Q8IYB3	576-590	PxxP_7	\N	PPRRRTPSPPPRRRS	Bio E E Ado Ado-PPRRRTPSPPPRRRS-CONH2	0.388431	\N	8	1	4.95839	HU (DAPF)	Bait concentration was adjusted to fit the profile to WT	2023/01/17
BIN1	O00499	513-593	SH3	P551L	his6-MBP-TEVsite-SH3	SYNJ1	O43426	1056-1070	PxxP_1	\N	ISEGPVPSLPIRPSR	Bio Ado Ado-ISEGPVPSLPIRPSR-CONH2	0.176537	\N	8	1	4.45376	HU (DAPF)	Bait concentration was adjusted to fit the profile to WT	2023/01/17
BIN1	O00499	513-593	SH3	P551L	his6-MBP-TEVsite-SH3	SYNJ1	O43426	1059-1073	PxxP_2	\N	GPVPSLPIRPSRAPS	Bio Ado Ado-GPVPSLPIRPSRAPS-CONH2	0.0461056	\N	8	1	0	HU (DAPF)	Bait concentration was adjusted to fit the profile to WT	2023/01/17
BIN1	O00499	513-593	SH3	P551L	his6-MBP-TEVsite-SH3	SYNJ1	O43426	1096-1110	PxxP_3	\N	QKDPAQPLEPKRPPP	Bio Ado Ado-QKDPAQPLEPKRPPP-CONH2	0.00431984	\N	8	1	0	HU (DAPF)	Bait concentration was adjusted to fit the profile to WT	2023/01/17
BIN1	O00499	513-593	SH3	P551L	his6-MBP-TEVsite-SH3	SYNJ1	O43426	1104-1118	PxxP_4	\N	EPKRPPPPRPVAPPT	Bio Ado Ado-EPKRPPPPRPVAPPT-CONH2	0.00652126	\N	8	1	0	HU (DAPF)	Bait concentration was adjusted to fit the profile to WT	2023/01/17
BIN1	O00499	513-593	SH3	P551L	his6-MBP-TEVsite-SH3	SYNJ1	O43426	1114-1128	PxxP_5	\N	VAPPTRPAPPQRPPP	Bio Ado Ado-VAPPTRPAPPQRPPP-CONH2	0.0268034	\N	8	1	0	HU (DAPF)	Bait concentration was adjusted to fit the profile to WT	2023/01/17
BIN1	O00499	513-593	SH3	P551L	his6-MBP-TEVsite-SH3	SYNJ1	O43426	1190-1204	PxxP_6	\N	GYSTARPTIPPRAGV	Bio Ado Ado-GYSTARPTIPPRAGV-CONH2	0.158312	\N	8	1	4.39421	HU (DAPF)	Bait concentration was adjusted to fit the profile to WT	2023/01/17
BIN1	O00499	513-593	SH3	P551L	his6-MBP-TEVsite-SH3	SYNJ1	O43426	1278-1292	PxxP_7	\N	PNLETPPQPPPRSRS	Bio Ado Ado-PNLETPPQPPPRSRS-CONH2	0.489667	\N	8	1	5.15423	HU (DAPF)	Bait concentration was adjusted to fit the profile to WT	2023/01/17
BIN1	O00499	513-593	SH3	P551L	his6-MBP-TEVsite-SH3	SYNJ1	O43426	1371-1385	PxxP_8	\N	SCMPTMPPIPARSQS	Bio Ado Ado-SCMPTMPPIPARSQS-CONH2	0.0614417	\N	8	1	3.92167	HU (DAPF)	Bait concentration was adjusted to fit the profile to WT	2023/01/17
BIN1	O00499	513-593	SH3	P551L	his6-MBP-TEVsite-SH3	SYNJ1	O43426	1407-1421	PxxP_9	\N	SDRTAAPGNPFRAKS	Bio Ado Ado-SDRTAAPGNPFRAKS-CONH2	0.02014	\N	8	1	0	HU (DAPF)	Bait concentration was adjusted to fit the profile to WT	2023/01/17
BIN1	O00499	513-593	SH3	P551L	his6-MBP-TEVsite-SH3	SYNJ1	O43426	1533-1547	PxxP_10	\N	LPSRRPPPPPVPLLP	Bio Ado Ado-LPSRRPPPPPVPLLP-CONH2	-0.0145978	\N	8	1	0	HU (DAPF)	Bait concentration was adjusted to fit the profile to WT	2023/01/17
BIN1	O00499	513-593	SH3	P551L	his6-MBP-TEVsite-SH3	SYNJ2	O15056	1098-1112	PxxP_1	\N	VPNRPRPPQPPQRPP	Bio Ado Ado-VPNRPRPPQPPQRPP-CONH2	0.0017146	\N	8	1	0	HU (DAPF)	Bait concentration was adjusted to fit the profile to WT	2023/01/17
BIN1	O00499	513-593	SH3	P551L	his6-MBP-TEVsite-SH3	SYNJ2	O15056	1099-1113	PxxP_2	\N	PNRPRPPQPPQRPPP	Bio Ado Ado-PNRPRPPQPPQRPPP-CONH2	-0.00905459	\N	8	1	0	HU (DAPF)	Bait concentration was adjusted to fit the profile to WT	2023/01/17
BIN1	O00499	513-593	SH3	P551L	his6-MBP-TEVsite-SH3	SYNJ2	O15056	1140-1154	PxxP_3	\N	QTARLLPGAPQQPPK	Bio Ado Ado-QTARLLPGAPQQPPK-CONH2	0.00265612	\N	8	1	0	HU (DAPF)	Bait concentration was adjusted to fit the profile to WT	2023/01/17
BIN1	O00499	513-593	SH3	P551L	his6-MBP-TEVsite-SH3	SYNJ2	O15056	1143-1157	PxxP_4	\N	RLLPGAPQQPPKART	Bio Ado Ado-RLLPGAPQQPPKART-CONH2	0.0393918	\N	8	1	0	HU (DAPF)	Bait concentration was adjusted to fit the profile to WT	2023/01/17
BIN1	O00499	513-593	SH3	P551L	his6-MBP-TEVsite-SH3	SYNJ2	O15056	1219-1233	PxxP_5	\N	ETPQAPPLLPRRPPP	Bio Ado Ado-ETPQAPPLLPRRPPP-CONH2	0.0406509	\N	8	1	0	HU (DAPF)	Bait concentration was adjusted to fit the profile to WT	2023/01/17
BIN1	O00499	513-593	SH3	P551L	his6-MBP-TEVsite-SH3	SYNJ2	O15056	1227-1241	PxxP_6	\N	LPRRPPPRVPAIKKP	Bio Ado Ado-LPRRPPPRVPAIKKP-CONH2	0.189815	\N	8	1	4.49431	HU (DAPF)	Bait concentration was adjusted to fit the profile to WT	2023/01/17
BIN1	O00499	513-593	SH3	P551L	his6-MBP-TEVsite-SH3	SYNJ2	O15056	1324-1338	PxxP_7	\N	EAPPLVPKVPPRRKK	Bio Ado Ado-EAPPLVPKVPPRRKK-CONH2	0.701836	\N	8	1	5.58113	HU (DAPF)	Bait concentration was adjusted to fit the profile to WT	2023/01/17
BIN1	O00499	513-593	SH3	P551L	his6-MBP-TEVsite-SH3	SYNJ2	O15056	1442-1456	PxxP_8	\N	RSPKRDPIDPVSAGA	Bio Ado Ado-RSPKRDPIDPVSAGA-CONH2	-0.0353924	\N	8	1	0	HU (DAPF)	Bait concentration was adjusted to fit the profile to WT	2023/01/17
BIN1	O00499	513-593	SH3	P551L	his6-MBP-TEVsite-SH3	TBC1D10B	Q4KMP7	15-29	PxxP_1	\N	HGAPAAPSPPPRGSR	Bio Ado Ado-HGAPAAPSPPPRGSR-CONH2	0.465182	\N	8	1	5.10751	HU (DAPF)	Bait concentration was adjusted to fit the profile to WT	2023/01/17
BIN1	O00499	513-593	SH3	P551L	his6-MBP-TEVsite-SH3	TBC1D10B	Q4KMP7	673-687	PxxP_2	\N	AGGAPSPPPPVRRAS	Bio Ado Ado-AGGAPSPPPPVRRAS-CONH2	0.0334541	\N	8	1	0	HU (DAPF)	Bait concentration was adjusted to fit the profile to WT	2023/01/17
BIN1	O00499	513-593	SH3	P551L	his6-MBP-TEVsite-SH3	TBC1D9B	Q66K14	261-275	PxxP_1	\N	DKALPRPIRPHRNIS	Bio Ado Ado-DKALPRPIRPHRNIS-CONH2	0.187601	\N	8	1	4.4877	HU (DAPF)	Bait concentration was adjusted to fit the profile to WT	2023/01/17
BIN1	O00499	513-593	SH3	P551L	his6-MBP-TEVsite-SH3	TBC1D9B	Q66K14	556-570	PxxP_2	\N	DLHRSMPEHPAFQNE	Bio Ado Ado-DLHRSMPEHPAFQNE-CONH2	-0.0108424	\N	8	1	0	HU (DAPF)	Bait concentration was adjusted to fit the profile to WT	2023/01/17
BIN1	O00499	513-593	SH3	P551L	his6-MBP-TEVsite-SH3	TIPIN	Q9BVW5	23-37	PxxP_1	\N	FPPFPPPASPERQDG	Bio Ado Ado-FPPFPPPASPERQDG-CONH2	0.0178455	\N	8	1	0	HU (DAPF)	Bait concentration was adjusted to fit the profile to WT	2023/01/17
BIN1	O00499	513-593	SH3	P551L	his6-MBP-TEVsite-SH3	TMEM237	Q96Q45	15-29	PxxP_1	\N	RPPRALPPVPSQDDI	Bio Ado Ado-RPPRALPPVPSQDDI-CONH2	0.000510971	\N	8	1	0	HU (DAPF)	Bait concentration was adjusted to fit the profile to WT	2023/01/17
BIN1	O00499	513-593	SH3	P551L	his6-MBP-TEVsite-SH3	TMEM237	Q96Q45	70-84	PxxP_2	\N	KELKEHPEAPVQRRQ	Bio Ado Ado-KELKEHPEAPVQRRQ-CONH2	0.00265834	\N	8	1	0	HU (DAPF)	Bait concentration was adjusted to fit the profile to WT	2023/01/17
BIN1	O00499	513-593	SH3	P551L	his6-MBP-TEVsite-SH3	TPX2	Q9ULW0	108-122	PxxP_1	\N	AISRKTPAQPQRRSL	Bio Ado Ado-AISRKTPAQPQRRSL-CONH2	0.0214378	0.0274961	8	2	0	HU (DAPF)	Bait concentration was adjusted to fit the profile to WT	2023/01/17
BIN1	O00499	513-593	SH3	P551L	his6-MBP-TEVsite-SH3	TPX2	Q9ULW0	285-299	PxxP_2	\N	SELRKHPSSPARVTK	Bio Ado Ado-SELRKHPSSPARVTK-CONH2	-0.000524446	0.00254835	8	2	0	HU (DAPF)	Bait concentration was adjusted to fit the profile to WT	2023/01/17
BIN1	O00499	513-593	SH3	P551L	his6-MBP-TEVsite-SH3	TPX2	Q9ULW0	410-424	PxxP_3	\N	RILEGGPILPKKPPV	Bio Ado Ado-RILEGGPILPKKPPV-CONH2	-0.0124028	\N	8	1	0	HU (DAPF)	Bait concentration was adjusted to fit the profile to WT	2023/01/17
BIN1	O00499	513-593	SH3	P551L	his6-MBP-TEVsite-SH3	TPX2	Q9ULW0	417-431	PxxP_4	\N	ILPKKPPVKPPTEPI	Bio Ado Ado-ILPKKPPVKPPTEPI-CONH2	-0.021331	\N	8	1	0	HU (DAPF)	Bait concentration was adjusted to fit the profile to WT	2023/01/17
BIN1	O00499	513-593	SH3	P551L	his6-MBP-TEVsite-SH3	TPX2	Q9ULW0	631-645	PxxP_5	\N	TVISQEPFVPKKEKK	Bio Ado Ado-TVISQEPFVPKKEKK-CONH2	-0.0236777	\N	8	1	0	HU (DAPF)	Bait concentration was adjusted to fit the profile to WT	2023/01/17
BIN1	O00499	513-593	SH3	P551L	his6-MBP-TEVsite-SH3	UNC119	Q13432	53-67	PxxP_1	\N	PLQRKQPIGPEDVLG	Bio Ado Ado-PLQRKQPIGPEDVLG-CONH2	0.0202088	\N	8	1	0	HU (DAPF)	Bait concentration was adjusted to fit the profile to WT	2023/01/17
BIN1	O00499	513-593	SH3	P551L	his6-MBP-TEVsite-SH3	WAS	P42768	154-168	PxxP_1	\N	GDRRQLPPPPTPANE	Bio Ado Ado-GDRRQLPPPPTPANE-CONH2	0.00371564	\N	8	1	0	HU (DAPF)	Bait concentration was adjusted to fit the profile to WT	2023/01/17
BIN1	O00499	513-593	SH3	P551L	his6-MBP-TEVsite-SH3	WAS	P42768	306-320	PxxP_2	\N	EMRRQEPLPPPPPPS	Bio Ado Ado-EMRRQEPLPPPPPPS-CONH2	0.00302994	\N	8	1	0	HU (DAPF)	Bait concentration was adjusted to fit the profile to WT	2023/01/17
BIN1	O00499	513-593	SH3	P551L	his6-MBP-TEVsite-SH3	WAS	P42768	310-324	PxxP_3	\N	QEPLPPPPPPSRGGN	Bio Ado Ado-QEPLPPPPPPSRGGN-CONH2	0.0515144	\N	8	1	3.83914	HU (DAPF)	Bait concentration was adjusted to fit the profile to WT	2023/01/17
BIN1	O00499	513-593	SH3	P551L	his6-MBP-TEVsite-SH3	WAS	P42768	335-349	PxxP_4	\N	NKGRSGPLPPVPLGI	Bio Ado Ado-NKGRSGPLPPVPLGI-CONH2	-0.0251544	\N	8	1	0	HU (DAPF)	Bait concentration was adjusted to fit the profile to WT	2023/01/17
BIN1	O00499	513-593	SH3	P551L	his6-MBP-TEVsite-SH3	WAS	P42768	353-367	PxxP_5	\N	PPTPRGPPPPGRGGP	Bio Ado Ado-PPTPRGPPPPGRGGP-CONH2	-0.0146741	\N	8	1	0	HU (DAPF)	Bait concentration was adjusted to fit the profile to WT	2023/01/17
BIN1	O00499	513-593	SH3	P551L	his6-MBP-TEVsite-SH3	WAS	P42768	361-375	PxxP_6	\N	PPGRGGPPPPPPPAT	Bio Ado Ado-PPGRGGPPPPPPPAT-CONH2	0.0126771	\N	8	1	0	HU (DAPF)	Bait concentration was adjusted to fit the profile to WT	2023/01/17
BIN1	O00499	513-593	SH3	P551L	his6-MBP-TEVsite-SH3	WAS	P42768	374-388	PxxP_7	\N	ATGRSGPLPPPPPGA	Bio Ado Ado-ATGRSGPLPPPPPGA-CONH2	-0.0161706	\N	8	1	0	HU (DAPF)	Bait concentration was adjusted to fit the profile to WT	2023/01/17
BIN1	O00499	513-593	SH3	P551L	his6-MBP-TEVsite-SH3	WDR33	Q9C0J8	1044-1058	PxxP_1	\N	KWRRGGPGPPFPPDH	Bio Ado Ado-KWRRGGPGPPFPPDH-CONH2	0.00925439	\N	8	1	0	HU (DAPF)	Bait concentration was adjusted to fit the profile to WT	2023/01/17
BIN1	O00499	513-593	SH3	P551L	his6-MBP-TEVsite-SH3	WDR33	Q9C0J8	939-953	PxxP_2	\N	AQGRIPPLNPGQGPG	Bio Ado Ado-AQGRIPPLNPGQGPG-CONH2	0.021314	\N	8	1	0	HU (DAPF)	Bait concentration was adjusted to fit the profile to WT	2023/01/17
BIN1	O00499	513-593	SH3	P551L	his6-MBP-TEVsite-SH3	WDR44	Q5JSH3	205-219	PxxP_1	\N	AVEEVAPAKPPRHLT	Bio Ado Ado-AVEEVAPAKPPRHLT-CONH2	0.0556052	\N	8	1	3.87479	HU (DAPF)	Bait concentration was adjusted to fit the profile to WT	2023/01/17
BIN1	O00499	513-593	SH3	P551L	his6-MBP-TEVsite-SH3	WDR44	Q5JSH3	227-241	PxxP_2	\N	STKKPVPARPPPPTN	Bio Ado Ado-STKKPVPARPPPPTN-CONH2	0.00397608	\N	8	1	0	HU (DAPF)	Bait concentration was adjusted to fit the profile to WT	2023/01/17
BIN1	O00499	513-593	SH3	P551L	his6-MBP-TEVsite-SH3	WDR44	Q5JSH3	241-255	PxxP_3	\N	NFPPPRPPPPSRPAP	Bio Ado Ado-NFPPPRPPPPSRPAP-CONH2	0.00166435	\N	8	1	0	HU (DAPF)	Bait concentration was adjusted to fit the profile to WT	2023/01/17
BIN1	O00499	513-593	SH3	P551L	his6-MBP-TEVsite-SH3	WDR44	Q5JSH3	247-261	PxxP_4	\N	PPPPSRPAPPPRKRK	Bio Ado Ado-PPPPSRPAPPPRKRK-CONH2	0.653279	\N	8	1	5.47568	HU (DAPF)	Bait concentration was adjusted to fit the profile to WT	2023/01/17
BIN1	O00499	513-593	SH3	P551L	his6-MBP-TEVsite-SH3	WEE1	P30291	3-17	PxxP_1	\N	FLSRQQPPPPRRAGA	Bio Ado Ado-FLSRQQPPPPRRAGA-CONH2	0.0289264	0.0191422	8	2	0	HU (DAPF)	Bait concentration was adjusted to fit the profile to WT	2023/01/17
BIN1	O00499	513-593	SH3	P551L	his6-MBP-TEVsite-SH3	WEE1	P30291	55-69	PxxP_2	\N	FQEPDSPLPPARSPT	Bio Ado Ado-FQEPDSPLPPARSPT-CONH2	0.00370717	\N	8	1	0	HU (DAPF)	Bait concentration was adjusted to fit the profile to WT	2023/01/17
BIN1	O00499	513-593	SH3	P551L	his6-MBP-TEVsite-SH3	WIPF1	O43516	138-152	PxxP_1	\N	AKPFSPPSGPGRFPV	Bio Ado Ado-AKPFSPPSGPGRFPV-CONH2	0.0548822	\N	8	1	3.86867	HU (DAPF)	Bait concentration was adjusted to fit the profile to WT	2023/01/17
BIN1	O00499	513-593	SH3	P551L	his6-MBP-TEVsite-SH3	WIPF1	O43516	155-169	PxxP_2	\N	PGHRSGPPEPQRNRM	Bio Ado Ado-PGHRSGPPEPQRNRM-CONH2	-0.0264062	0.00630511	8	2	0	HU (DAPF)	Bait concentration was adjusted to fit the profile to WT	2023/01/17
BIN1	O00499	513-593	SH3	P551L	his6-MBP-TEVsite-SH3	WIPF1	O43516	165-179	PxxP_3	\N	QRNRMPPPRPDVGSK	Bio Ado Ado-QRNRMPPPRPDVGSK-CONH2	-0.0248777	\N	8	1	0	HU (DAPF)	Bait concentration was adjusted to fit the profile to WT	2023/01/17
BIN1	O00499	513-593	SH3	P551L	his6-MBP-TEVsite-SH3	WIPF1	O43516	198-212	PxxP_4	\N	PHNRGSPPVPGGPRQ	Bio Ado Ado-PHNRGSPPVPGGPRQ-CONH2	0.0363516	\N	8	1	0	HU (DAPF)	Bait concentration was adjusted to fit the profile to WT	2023/01/17
BIN1	O00499	513-593	SH3	P551L	his6-MBP-TEVsite-SH3	WIPF1	O43516	247-261	PxxP_5	\N	SNRPPLPPTPSRALD	Bio Ado Ado-SNRPPLPPTPSRALD-CONH2	0.00483505	\N	8	1	0	HU (DAPF)	Bait concentration was adjusted to fit the profile to WT	2023/01/17
BIN1	O00499	513-593	SH3	P551L	his6-MBP-TEVsite-SH3	WIPF1	O43516	260-274	PxxP_6	\N	LDDKPPPPPPPVGNR	Bio Ado Ado-LDDKPPPPPPPVGNR-CONH2	0.0259035	\N	8	1	0	HU (DAPF)	Bait concentration was adjusted to fit the profile to WT	2023/01/17
BIN1	O00499	513-593	SH3	P551L	his6-MBP-TEVsite-SH3	WIPF1	O43516	304-318	PxxP_7	\N	SQAPPPPPPPSRPGP	Bio Ado Ado-SQAPPPPPPPSRPGP-CONH2	-0.00424886	\N	8	1	0	HU (DAPF)	Bait concentration was adjusted to fit the profile to WT	2023/01/17
BIN1	O00499	513-593	SH3	P551L	his6-MBP-TEVsite-SH3	WIPF1	O43516	326-340	PxxP_8	\N	SGNDETPRLPQRNLS	Bio Ado Ado-SGNDETPRLPQRNLS-CONH2	0.00504745	\N	8	1	0	HU (DAPF)	Bait concentration was adjusted to fit the profile to WT	2023/01/17
BIN1	O00499	513-593	SH3	P551L	his6-MBP-TEVsite-SH3	WIPF1	O43516	350-364	PxxP_9	\N	SPGRSGPLPPPPSER	Bio Ado Ado-SPGRSGPLPPPPSER-CONH2	-0.000993147	\N	8	1	0	HU (DAPF)	Bait concentration was adjusted to fit the profile to WT	2023/01/17
BIN1	O00499	513-593	SH3	P551L	his6-MBP-TEVsite-SH3	WIPF1	O43516	359-373	PxxP_10	\N	PPPSERPPPPVRDPP	Bio Ado Ado-PPPSERPPPPVRDPP-CONH2	0.00867181	\N	8	1	0	HU (DAPF)	Bait concentration was adjusted to fit the profile to WT	2023/01/17
BIN1	O00499	513-593	SH3	P551L	his6-MBP-TEVsite-SH3	WIPF1	O43516	372-386	PxxP_11	\N	PPGRSGPLPPPPPVS	Bio Ado Ado-PPGRSGPLPPPPPVS-CONH2	-0.0182551	\N	8	1	0	HU (DAPF)	Bait concentration was adjusted to fit the profile to WT	2023/01/17
BIN1	O00499	513-593	SH3	P551L	his6-MBP-TEVsite-SH3	WIPF1	O43516	390-404	PxxP_12	\N	STSRALPATPQLPSR	Bio Ado Ado-STSRALPATPQLPSR-CONH2	0.0155482	\N	8	1	0	HU (DAPF)	Bait concentration was adjusted to fit the profile to WT	2023/01/17
BIN1	O00499	513-593	SH3	P551L	his6-MBP-TEVsite-SH3	WIPF1	O43516	393-407	PxxP_13	\N	RALPATPQLPSRSGV	Bio Ado Ado-RALPATPQLPSRSGV-CONH2	0.0743386	\N	8	1	4.01229	HU (DAPF)	Bait concentration was adjusted to fit the profile to WT	2023/01/17
BIN1	O00499	513-593	SH3	P551L	his6-MBP-TEVsite-SH3	WIPF1	O43516	408-422	PxxP_14	\N	DSPRSGPRPPLPPDR	Bio Ado Ado-DSPRSGPRPPLPPDR-CONH2	0.0482832	\N	8	1	0	HU (DAPF)	Bait concentration was adjusted to fit the profile to WT	2023/01/17
BIN1	O00499	513-593	SH3	P551L	his6-MBP-TEVsite-SH3	WIPF1	O43516	411-425	PxxP_15	\N	RSGPRPPLPPDRPSA	Bio Ado Ado-RSGPRPPLPPDRPSA-CONH2	0.0167643	\N	8	1	0	HU (DAPF)	Bait concentration was adjusted to fit the profile to WT	2023/01/17
BIN1	O00499	513-593	SH3	P551L	his6-MBP-TEVsite-SH3	WIPF1	O43516	490-503	PxxP_16	\N	RRERGAPPLPPIPR_	Bio Ado Ado-RRERGAPPLPPIPR_-CONH2	0.111781	\N	8	1	4.21283	HU (DAPF)	Bait concentration was adjusted to fit the profile to WT	2023/01/17
BIN1	O00499	513-593	SH3	P551L	his6-MBP-TEVsite-SH3	WIZ	O95785	1135-1149	PxxP_1	\N	PLAKKLPPPPGSPLG	Bio Ado Ado-PLAKKLPPPPGSPLG-CONH2	0.0266965	\N	8	1	0	HU (DAPF)	Bait concentration was adjusted to fit the profile to WT	2023/01/17
BIN1	O00499	513-593	SH3	P551L	his6-MBP-TEVsite-SH3	WIZ	O95785	1164-1178	PxxP_2	\N	FPGLAAPSLPKKLKP	Bio Ado Ado-FPGLAAPSLPKKLKP-CONH2	0.0113449	\N	8	1	0	HU (DAPF)	Bait concentration was adjusted to fit the profile to WT	2023/01/17
BIN1	O00499	513-593	SH3	P551L	his6-MBP-TEVsite-SH3	WIZ	O95785	157-171	PxxP_3	\N	LPAQPPPLAPFRRVF	Bio Ado Ado-LPAQPPPLAPFRRVF-CONH2	0.160265	\N	8	1	4.40084	HU (DAPF)	Bait concentration was adjusted to fit the profile to WT	2023/01/17
BIN1	O00499	513-593	SH3	P551L	his6-MBP-TEVsite-SH3	WIZ	O95785	9-23	PxxP_4	\N	LAAPDRPQGPERLPG	Bio Ado Ado-LAAPDRPQGPERLPG-CONH2	0.0202621	\N	8	1	0	HU (DAPF)	Bait concentration was adjusted to fit the profile to WT	2023/01/17
BIN1	O00499	513-593	SH3	P551L	his6-MBP-TEVsite-SH3	XRN2	Q9H0D6	933-947	PxxP_1	\N	REGRKYPLPPPSGRY	Bio Ado Ado-REGRKYPLPPPSGRY-CONH2	0.113043	\N	8	1	4.21851	HU (DAPF)	Bait concentration was adjusted to fit the profile to WT	2023/01/17
BIN1	O00499	513-593	SH3	P551L	his6-MBP-TEVsite-SH3	YAF2	Q8IY57	3-17	PxxP_1	\N	DKKSPTRPKRQPKPS	Bio Ado Ado-DKKSPTRPKRQPKPS-CONH2	0.257804	0.0111078	8	2	4.67569	HU (DAPF)	Bait concentration was adjusted to fit the profile to WT	2023/01/17
BIN1	O00499	513-593	SH3	P551L	his6-MBP-TEVsite-SH3	ZC3H13	Q5T200	1025-1039	PxxP_1	\N	SKKKRGPRTPPITTK	Bio Ado Ado-SKKKRGPRTPPITTK-CONH2	0.122876	\N	8	1	4.26101	HU (DAPF)	Bait concentration was adjusted to fit the profile to WT	2023/01/17
BIN1	O00499	513-593	SH3	P551L	his6-MBP-TEVsite-SH3	ZC3H13	Q5T200	255-269	PxxP_2	\N	QSKKKGPRTPSPPPP	Bio Ado Ado-QSKKKGPRTPSPPPP-CONH2	0.0181574	\N	8	1	0	HU (DAPF)	Bait concentration was adjusted to fit the profile to WT	2023/01/17
BIN1	O00499	513-593	SH3	P551L	his6-MBP-TEVsite-SH3	ZC3H13	Q5T200	562-576	PxxP_3	\N	RSRGRVPELPEKGSR	Bio Ado Ado-RSRGRVPELPEKGSR-CONH2	0.0152146	\N	8	1	0	HU (DAPF)	Bait concentration was adjusted to fit the profile to WT	2023/01/17
BIN1	O00499	513-593	SH3	P551L	his6-MBP-TEVsite-SH3	ZC3H13	Q5T200	635-649	PxxP_4	\N	RERDQRPSSPIRHQG	Bio Ado Ado-RERDQRPSSPIRHQG-CONH2	-0.00267654	\N	8	1	0	HU (DAPF)	Bait concentration was adjusted to fit the profile to WT	2023/01/17
BIN1	O00499	513-593	SH3	P551L	his6-MBP-TEVsite-SH3	ZC3H13	Q5T200	72-86	PxxP_5	\N	SNYRRSPERPTGDLR	Bio Ado Ado-SNYRRSPERPTGDLR-CONH2	0.0181134	\N	8	1	0	HU (DAPF)	Bait concentration was adjusted to fit the profile to WT	2023/01/17
BIN1	O00499	513-593	SH3	P551L	his6-MBP-TEVsite-SH3	ZC3H14	Q6PJT7	329-343	PxxP_1	\N	SSSVSVPAKPERRPS	Bio Ado Ado-SSSVSVPAKPERRPS-CONH2	0.0361839	0.00867804	8	2	0	HU (DAPF)	Bait concentration was adjusted to fit the profile to WT	2023/01/17
BIN1	O00499	513-593	SH3	P551L	his6-MBP-TEVsite-SH3	ZC4H2	Q9NQZ6	209-223	PxxP_1	\N	KSRSRNPKKPKRKQD	Bio Ado Ado-KSRSRNPKKPKRKQD-CONH2	0.117344	\N	8	1	4.23747	HU (DAPF)	Bait concentration was adjusted to fit the profile to WT	2023/01/17
BIN1	O00499	513-593	SH3	P551L	his6-MBP-TEVsite-SH3	ZNF280C	Q8ND82	72-86	PxxP_1	\N	KGIKSEPHSPGIPEI	Bio Ado Ado-KGIKSEPHSPGIPEI-CONH2	-0.0402586	\N	8	1	0	HU (DAPF)	Bait concentration was adjusted to fit the profile to WT	2023/01/17
BIN1	O00499	513-593	SH3	P551L	his6-MBP-TEVsite-SH3	ZNF280C	Q8ND82	92-106	PxxP_2	\N	QRCRDPPSNPVAASP	Bio Ado Ado-QRCRDPPSNPVAASP-CONH2	0.0457591	\N	8	1	0	HU (DAPF)	Bait concentration was adjusted to fit the profile to WT	2023/01/17
BIN1	O00499	513-593	SH3	P551L	his6-MBP-TEVsite-SH3	ZNF787	Q6DD87	56-70	PxxP_1	\N	PPPRPRPPAPYICNE	Bio Ado Ado-PPPRPRPPAPYICNE-CONH2	-0.012412	\N	8	1	0	HU (DAPF)	Bait concentration was adjusted to fit the profile to WT	2023/01/17
BIN1	O00499	513-593	SH3	V583I	his6-MBP-TEVsite-SH3	ACAP1	Q15027	534-548	PxxP_1	\N	GRPRGQPPVPPKPSI	bio ado ado-GRPRGQPPVPPKPSI	0.0253662	0.0106288	9	4	0	HU (DAPF)	Bait concentration was adjusted to fit the profile to WT	2022.10.24.
BIN1	O00499	513-593	SH3	V583I	his6-MBP-TEVsite-SH3	ACAP1	Q15027	553-567	PxxP_2	\N	GSLRSKPEPPSEDLG	bio ado ado-GSLRSKPEPPSEDLG	0.0113756	0.0186907	9	2	0	HU (DAPF)	Bait concentration was adjusted to fit the profile to WT	2022.10.24.
BIN1	O00499	513-593	SH3	V583I	his6-MBP-TEVsite-SH3	ARHGAP17	Q68EM7	632-646	PxxP_1	\N	AVKKPAPAPPKPGNP	bio ado ado-AVKKPAPAPPKPGNP	-0.0587209	0.0623657	9	2	0	HU (DAPF)	Bait concentration was adjusted to fit the profile to WT	2022.10.24.
BIN1	O00499	513-593	SH3	V583I	his6-MBP-TEVsite-SH3	ARHGAP17	Q68EM7	662-676	PxxP_2	\N	HPPSLSPKPPTRSPS	bio ado ado-HPPSLSPKPPTRSPS	0.0126497	0.0169444	9	2	0	HU (DAPF)	Bait concentration was adjusted to fit the profile to WT	2022.10.24.
BIN1	O00499	513-593	SH3	V583I	his6-MBP-TEVsite-SH3	ARHGAP17	Q68EM7	765-779	PxxP_3	\N	PLGKQNPSLPAPQTL	bio ado ado-PLGKQNPSLPAPQTL	-0.0392202	0.043743	9	2	0	HU (DAPF)	Bait concentration was adjusted to fit the profile to WT	2022.10.24.
BIN1	O00499	513-593	SH3	V583I	his6-MBP-TEVsite-SH3	ARHGAP17	Q68EM7	801-815	PxxP_4	\N	PKPRNRPSVPPPPQP	bio ado ado-PKPRNRPSVPPPPQP	-0.00811003	0.0303455	9	2	0	HU (DAPF)	Bait concentration was adjusted to fit the profile to WT	2022.10.24.
BIN1	O00499	513-593	SH3	V583I	his6-MBP-TEVsite-SH3	ARHGAP45	Q92619	1106-1120	PxxP_1	\N	NNVLQAPLPPMRLRG	bio ado ado-NNVLQAPLPPMRLRG	0.28119	0.00288506	9	2	4.69612	HU (DAPF)	Bait concentration was adjusted to fit the profile to WT	2022.10.24.
BIN1	O00499	513-593	SH3	V583I	his6-MBP-TEVsite-SH3	ARHGAP45	Q92619	681-695	PxxP_2	\N	ELPVAVPSGPFRHEG	bio ado ado-ELPVAVPSGPFRHEG	0.00756716	0.00868801	9	2	0	HU (DAPF)	Bait concentration was adjusted to fit the profile to WT	2022.10.24.
BIN1	O00499	513-593	SH3	V583I	his6-MBP-TEVsite-SH3	BUD13	Q9BRD0	194-208	PxxP_1	\N	RHDSPDPSPPRRPQH	bio ado ado-RHDSPDPSPPRRPQH	-0.000782744	0.0120501	9	2	0	HU (DAPF)	Bait concentration was adjusted to fit the profile to WT	2022.10.24.
BIN1	O00499	513-593	SH3	V583I	his6-MBP-TEVsite-SH3	BUD13	Q9BRD0	219-233	PxxP_2	\N	RHDSPDPSPPRRARH	bio ado ado-RHDSPDPSPPRRARH	0.137388	0.0127192	9	2	4.27525	HU (DAPF)	Bait concentration was adjusted to fit the profile to WT	2022.10.24.
BIN1	O00499	513-593	SH3	V583I	his6-MBP-TEVsite-SH3	C1orf122	Q6ZSJ8	25-39	PxxP_1	\N	GLGGRPPPQPPREER	bio ado ado-GLGGRPPPQPPREER	-0.00812958	0.0528408	9	2	0	HU (DAPF)	Bait concentration was adjusted to fit the profile to WT	2022.10.24.
BIN1	O00499	513-593	SH3	V583I	his6-MBP-TEVsite-SH3	C1orf122	Q6ZSJ8	26-40	PxxP_2	\N	LGGRPPPQPPREERA	bio ado ado-LGGRPPPQPPREERA	-0.0263251	0.0431714	9	2	0	HU (DAPF)	Bait concentration was adjusted to fit the profile to WT	2022.10.24.
BIN1	O00499	513-593	SH3	V583I	his6-MBP-TEVsite-SH3	CBL	P22681	488-502	PxxP_1	\N	APQASLPPVPPRLDL	bio ado ado-APQASLPPVPPRLDL	-0.00314019	0.00293254	9	2	0	HU (DAPF)	Bait concentration was adjusted to fit the profile to WT	2022.10.24.
BIN1	O00499	513-593	SH3	V583I	his6-MBP-TEVsite-SH3	CBL	P22681	528-542	PxxP_2	\N	HKDKPLPVPPTLRDL	bio ado ado-HKDKPLPVPPTLRDL	-0.0211998	0.0501241	9	2	0	HU (DAPF)	Bait concentration was adjusted to fit the profile to WT	2022.10.24.
BIN1	O00499	513-593	SH3	V583I	his6-MBP-TEVsite-SH3	CBL	P22681	537-551	PxxP_3	\N	PTLRDLPPPPPPDRP	bio ado ado-PTLRDLPPPPPPDRP	-0.00530647	0.0343581	9	2	0	HU (DAPF)	Bait concentration was adjusted to fit the profile to WT	2022.10.24.
BIN1	O00499	513-593	SH3	V583I	his6-MBP-TEVsite-SH3	CBL	P22681	539-553	PxxP_4	\N	LRDLPPPPPPDRPYS	bio ado ado-LRDLPPPPPPDRPYS	-0.0538083	0.0623106	9	2	0	HU (DAPF)	Bait concentration was adjusted to fit the profile to WT	2022.10.24.
BIN1	O00499	513-593	SH3	V583I	his6-MBP-TEVsite-SH3	CBL	P22681	560-574	PxxP_5	\N	PQRRPLPCTPGDCPS	bio ado ado-PQRRPLPCTPGDCPS	-0.00837729	0.0634518	9	2	0	HU (DAPF)	Bait concentration was adjusted to fit the profile to WT	2022.10.24.
BIN1	O00499	513-593	SH3	V583I	his6-MBP-TEVsite-SH3	CBL	P22681	590-604	PxxP_6	\N	WLPRPIPKVPVSAPS	bio ado ado-WLPRPIPKVPVSAPS	-0.00431692	0.0357155	9	2	0	HU (DAPF)	Bait concentration was adjusted to fit the profile to WT	2022.10.24.
BIN1	O00499	513-593	SH3	V583I	his6-MBP-TEVsite-SH3	CBL	P22681	814-828	PxxP_7	\N	TEGSQVPERPPKPFP	bio ado ado-TEGSQVPERPPKPFP	0.0223505	0.0309622	9	2	0	HU (DAPF)	Bait concentration was adjusted to fit the profile to WT	2022.10.24.
BIN1	O00499	513-593	SH3	V583I	his6-MBP-TEVsite-SH3	CDC27	P30260	396-410	PxxP_1	\N	LKMKFPPKIPNRKTK	bio ado ado-LKMKFPPKIPNRKTK	0.607089	0.0306842	9	4	5.37128	HU (DAPF)	Bait concentration was adjusted to fit the profile to WT	2022.10.24.
BIN1	O00499	513-593	SH3	V583I	his6-MBP-TEVsite-SH3	DDX42	Q86XP3	183-197	PxxP_1	\N	YDSDGNPIAPTKKII	bio ado ado-YDSDGNPIAPTKKII	0.022277	0.015122	9	2	0	HU (DAPF)	Bait concentration was adjusted to fit the profile to WT	2022.10.24.
BIN1	O00499	513-593	SH3	V583I	his6-MBP-TEVsite-SH3	DDX42	Q86XP3	23-37	PxxP_2	\N	AGKKEEPKLPQQSHS	bio ado ado-AGKKEEPKLPQQSHS	0.00322815	0.0101694	9	2	0	HU (DAPF)	Bait concentration was adjusted to fit the profile to WT	2022.10.24.
BIN1	O00499	513-593	SH3	V583I	his6-MBP-TEVsite-SH3	DDX42	Q86XP3	920-934	PxxP_3	\N	ADGFAVPEPPKRKKS	bio ado ado-ADGFAVPEPPKRKKS	0.387815	0.01998	9	2	4.92966	HU (DAPF)	Bait concentration was adjusted to fit the profile to WT	2022.10.24.
BIN1	O00499	513-593	SH3	V583I	his6-MBP-TEVsite-SH3	DMBT1	Q9UGM3	215-229	PxxP_1	\N	WPVRISPPVPTEGSE	bio ado ado-WPVRISPPVPTEGSE	-0.0125464	0.0245502	9	2	0	HU (DAPF)	Bait concentration was adjusted to fit the profile to WT	2022.10.24.
BIN1	O00499	513-593	SH3	V583I	his6-MBP-TEVsite-SH3	DNM2	P50570	313-327	PxxP_1	\N	EYKNFRPDDPTRKTK	bio ado ado-EYKNFRPDDPTRKTK	-7.95701e-05	0.0134186	9	2	0	HU (DAPF)	Bait concentration was adjusted to fit the profile to WT	2022.10.24.
BIN1	O00499	513-593	SH3	V583I	his6-MBP-TEVsite-SH3	DNM2	P50570	801-815	PxxP_2	\N	AASFSAPPIPSRPGP	bio ado ado-AASFSAPPIPSRPGP	0.0135691	0.00108618	9	2	0	HU (DAPF)	Bait concentration was adjusted to fit the profile to WT	2022.10.24.
BIN1	O00499	513-593	SH3	V583I	his6-MBP-TEVsite-SH3	DNM2	P50570	823-837	PxxP_3	\N	DLFPAPPQIPSRPVR	bio ado ado-DLFPAPPQIPSRPVR	0.0681328	0.0550291	9	2	3.92311	HU (DAPF)	Bait concentration was adjusted to fit the profile to WT	2022.10.24.
BIN1	O00499	513-593	SH3	V583I	his6-MBP-TEVsite-SH3	DNM2	P50570	826-840	PxxP_4	\N	PAPPQIPSRPVRIPP	bio ado ado-PAPPQIPSRPVRIPP	0.0238945	0.0262768	9	2	0	HU (DAPF)	Bait concentration was adjusted to fit the profile to WT	2022.10.24.
BIN1	O00499	513-593	SH3	V583I	his6-MBP-TEVsite-SH3	DNM2	P50570	834-848	PxxP_5	\N	RPVRIPPGIPPGVPS	bio ado ado-RPVRIPPGIPPGVPS	0.0301818	0.00553916	9	2	0	HU (DAPF)	Bait concentration was adjusted to fit the profile to WT	2022.10.24.
BIN1	O00499	513-593	SH3	V583I	his6-MBP-TEVsite-SH3	DNM2	P50570	838-852	PxxP_6	\N	IPPGIPPGVPSRRPP	bio ado ado-IPPGIPPGVPSRRPP	0.00431929	0.00636385	9	2	0	HU (DAPF)	Bait concentration was adjusted to fit the profile to WT	2022.10.24.
BIN1	O00499	513-593	SH3	V583I	his6-MBP-TEVsite-SH3	DNM2	P50570	846-860	PxxP_7	\N	VPSRRPPAAPSRPTI	bio ado ado-VPSRRPPAAPSRPTI	0.0211096	0.0280174	9	4	0	HU (DAPF)	Bait concentration was adjusted to fit the profile to WT	2022.10.24.
BIN1	O00499	513-593	SH3	V583I	his6-MBP-TEVsite-SH3	DNMT1	P26358	129-143	PxxP_1	\N	PKPLSKPRTPRRSKS	bio ado ado-PKPLSKPRTPRRSKS	0.417523	0.021097	9	2	4.9903	HU (DAPF)	Bait concentration was adjusted to fit the profile to WT	2022.10.24.
BIN1	O00499	513-593	SH3	V583I	his6-MBP-TEVsite-SH3	DNMT1	P26358	323-337	PxxP_2	\N	KRRKTTPKEPTEKKM	bio ado ado-KRRKTTPKEPTEKKM	0.00731534	0.00308956	9	2	0	HU (DAPF)	Bait concentration was adjusted to fit the profile to WT	2022.10.24.
BIN1	O00499	513-593	SH3	V583I	his6-MBP-TEVsite-SH3	EZH2	Q15910	341-355	PxxP_1	\N	ERIKTPPKRPGGRRR	bio ado ado-ERIKTPPKRPGGRRR	0.204543	0.0785149	9	2	4.49732	HU (DAPF)	Bait concentration was adjusted to fit the profile to WT	2022.10.24.
BIN1	O00499	513-593	SH3	V583I	his6-MBP-TEVsite-SH3	G3BP1	Q13283	288-302	PxxP_1	\N	PESQIPPQRPQRDQR	bio ado ado-PESQIPPQRPQRDQR	-0.0109287	0.0639637	9	2	0	HU (DAPF)	Bait concentration was adjusted to fit the profile to WT	2022.10.24.
BIN1	O00499	513-593	SH3	V583I	his6-MBP-TEVsite-SH3	HDGFL2	Q7Z4V5	288-302	PxxP_1	\N	RGRKPKPERPPSSSS	bio ado ado-RGRKPKPERPPSSSS	0.0187527	0.00213741	9	2	0	HU (DAPF)	Bait concentration was adjusted to fit the profile to WT	2022.10.24.
BIN1	O00499	513-593	SH3	V583I	his6-MBP-TEVsite-SH3	HIRIP3	Q9BW71	531-545	PxxP_1	\N	DEERPRPAPPDWSHM	bio ado ado-DEERPRPAPPDWSHM	0.0135419	0.0223074	9	2	0	HU (DAPF)	Bait concentration was adjusted to fit the profile to WT	2022.10.24.
BIN1	O00499	513-593	SH3	V583I	his6-MBP-TEVsite-SH3	HMGA1	P17096	28-42	PxxP_1	\N	RPRKQPPVSPGTALV	bio ado ado-RPRKQPPVSPGTALV	0.0360149	0.0478258	9	2	0	HU (DAPF)	Bait concentration was adjusted to fit the profile to WT	2022.10.24.
BIN1	O00499	513-593	SH3	V583I	his6-MBP-TEVsite-SH3	HNRNPK	P61978	266-280	PxxP_1	\N	PGRGGRPMPPSRRDY	bio ado ado-PGRGGRPMPPSRRDY	0.23626	0.0299196	9	2	4.58438	HU (DAPF)	Bait concentration was adjusted to fit the profile to WT	2022.10.24.
BIN1	O00499	513-593	SH3	V583I	his6-MBP-TEVsite-SH3	HNRNPK	P61978	283-297	PxxP_2	\N	MSPRRGPPPPPPGRG	bio ado ado-MSPRRGPPPPPPGRG	0.0938814	0.00389114	9	2	4.07966	HU (DAPF)	Bait concentration was adjusted to fit the profile to WT	2022.10.24.
BIN1	O00499	513-593	SH3	V583I	his6-MBP-TEVsite-SH3	HNRNPK	P61978	284-298	PxxP_3	\N	SPRRGPPPPPPGRGG	bio ado ado-SPRRGPPPPPPGRGG	0.101513	0.0033268	9	2	4.11882	HU (DAPF)	Bait concentration was adjusted to fit the profile to WT	2022.10.24.
BIN1	O00499	513-593	SH3	V583I	his6-MBP-TEVsite-SH3	HNRNPK	P61978	285-299	PxxP_4	\N	PRRGPPPPPPGRGGR	bio ado ado-PRRGPPPPPPGRGGR	0.211519	0.00489265	9	2	4.51719	HU (DAPF)	Bait concentration was adjusted to fit the profile to WT	2022.10.24.
BIN1	O00499	513-593	SH3	V583I	his6-MBP-TEVsite-SH3	HNRNPK	P61978	302-316	PxxP_5	\N	SRARNLPLPPPPPPR	bio ado ado-SRARNLPLPPPPPPR	0.181259	0.0183764	9	2	4.42739	HU (DAPF)	Bait concentration was adjusted to fit the profile to WT	2022.10.24.
BIN1	O00499	513-593	SH3	V583I	his6-MBP-TEVsite-SH3	HNRNPK	P61978	305-319	PxxP_6	\N	RNLPLPPPPPPRGGD	bio ado ado-RNLPLPPPPPPRGGD	0.0184604	0.0456588	9	2	0	HU (DAPF)	Bait concentration was adjusted to fit the profile to WT	2022.10.24.
BIN1	O00499	513-593	SH3	V583I	his6-MBP-TEVsite-SH3	IRF2BP1	Q8IU81	361-375	PxxP_1	\N	ALCGPPPRAPSRNLA	bio ado ado-ALCGPPPRAPSRNLA	0.0489747	0.0149425	9	2	0	HU (DAPF)	Bait concentration was adjusted to fit the profile to WT	2022.10.24.
BIN1	O00499	513-593	SH3	V583I	his6-MBP-TEVsite-SH3	KHDRBS1	Q07666	32-46	PxxP_1	\N	QTPSRQPPLPHRSRG	bio ado ado-QTPSRQPPLPHRSRG	0.0536403	0.0272646	9	2	3.80967	HU (DAPF)	Bait concentration was adjusted to fit the profile to WT	2022.10.24.
BIN1	O00499	513-593	SH3	V583I	his6-MBP-TEVsite-SH3	KHDRBS1	Q07666	328-342	PxxP_2	\N	TVTRGVPPPPTVRGA	bio ado ado-TVTRGVPPPPTVRGA	-0.00169861	0.0354271	9	2	0	HU (DAPF)	Bait concentration was adjusted to fit the profile to WT	2022.10.24.
BIN1	O00499	513-593	SH3	V583I	his6-MBP-TEVsite-SH3	KHDRBS1	Q07666	421-435	PxxP_3	\N	PSLKAPPARPVKGAY	bio ado ado-PSLKAPPARPVKGAY	-0.00103833	0.0283937	9	4	0	HU (DAPF)	Bait concentration was adjusted to fit the profile to WT	2022.10.24.
BIN1	O00499	513-593	SH3	V583I	his6-MBP-TEVsite-SH3	MKI67	P46013	1083-1097	PxxP_1	\N	TGMKKWPRTPKEEAQ	bio ado ado-TGMKKWPRTPKEEAQ	-0.0208861	0.0374747	9	2	0	HU (DAPF)	Bait concentration was adjusted to fit the profile to WT	2022.10.24.
BIN1	O00499	513-593	SH3	V583I	his6-MBP-TEVsite-SH3	MKI67	P46013	1327-1341	PxxP_2	\N	TGSKRRPQTPKEEAQ	bio ado ado-TGSKRRPQTPKEEAQ	-0.0102779	0.00532729	9	2	0	HU (DAPF)	Bait concentration was adjusted to fit the profile to WT	2022.10.24.
BIN1	O00499	513-593	SH3	V583I	his6-MBP-TEVsite-SH3	MKI67	P46013	1385-1399	PxxP_3	\N	TSTRRQPKTPLEKRD	bio ado ado-TSTRRQPKTPLEKRD	0.0288842	0.013595	9	2	0	HU (DAPF)	Bait concentration was adjusted to fit the profile to WT	2022.10.24.
BIN1	O00499	513-593	SH3	V583I	his6-MBP-TEVsite-SH3	MKI67	P46013	1935-1949	PxxP_4	\N	PGSKRRPQTPKEKAK	bio ado ado-PGSKRRPQTPKEKAK	0.0398597	0.021379	9	2	0	HU (DAPF)	Bait concentration was adjusted to fit the profile to WT	2022.10.24.
BIN1	O00499	513-593	SH3	V583I	his6-MBP-TEVsite-SH3	MKI67	P46013	2115-2129	PxxP_5	\N	TSTRRRPKTPLGKRD	bio ado ado-TSTRRRPKTPLGKRD	0.055888	0.0185303	9	2	3.82898	HU (DAPF)	Bait concentration was adjusted to fit the profile to WT	2022.10.24.
BIN1	O00499	513-593	SH3	V583I	his6-MBP-TEVsite-SH3	MKI67	P46013	2175-2189	PxxP_6	\N	TGSKRQPRTPKGKAQ	bio ado ado-TGSKRQPRTPKGKAQ	0.00171297	0.0284615	9	2	0	HU (DAPF)	Bait concentration was adjusted to fit the profile to WT	2022.10.24.
BIN1	O00499	513-593	SH3	V583I	his6-MBP-TEVsite-SH3	MKI67	P46013	2297-2311	PxxP_7	\N	PGSKRWPQTPKEKAQ	bio ado ado-PGSKRWPQTPKEKAQ	-0.0038389	0.0324109	9	2	0	HU (DAPF)	Bait concentration was adjusted to fit the profile to WT	2022.10.24.
BIN1	O00499	513-593	SH3	V583I	his6-MBP-TEVsite-SH3	MKI67	P46013	2418-2432	PxxP_8	\N	PGSKRQPQTPKEKAE	bio ado ado-PGSKRQPQTPKEKAE	-0.0220593	0.0160019	9	2	0	HU (DAPF)	Bait concentration was adjusted to fit the profile to WT	2022.10.24.
BIN1	O00499	513-593	SH3	V583I	his6-MBP-TEVsite-SH3	MKI67	P46013	2660-2674	PxxP_9	\N	EPSRRRPRAPKEKAQ	bio ado ado-EPSRRRPRAPKEKAQ	0.0267647	0.00991608	9	2	0	HU (DAPF)	Bait concentration was adjusted to fit the profile to WT	2022.10.24.
BIN1	O00499	513-593	SH3	V583I	his6-MBP-TEVsite-SH3	MKI67	P46013	2781-2795	PxxP_10	\N	TGSRRRPRAPRESAQ	bio ado ado-TGSRRRPRAPRESAQ	0.0969761	0.0841147	9	2	4.09586	HU (DAPF)	Bait concentration was adjusted to fit the profile to WT	2022.10.24.
BIN1	O00499	513-593	SH3	V583I	his6-MBP-TEVsite-SH3	MKI67	P46013	2899-2913	PxxP_11	\N	IGSRRQPRAPKEKAQ	bio ado ado-IGSRRQPRAPKEKAQ	0.0148638	0.00644186	9	2	0	HU (DAPF)	Bait concentration was adjusted to fit the profile to WT	2022.10.24.
BIN1	O00499	513-593	SH3	V583I	his6-MBP-TEVsite-SH3	MKI67	P46013	2986-3000	PxxP_12	\N	KSNTSLPPLPFKRGG	bio ado ado-KSNTSLPPLPFKRGG	0.0413124	0.0267769	9	2	0	HU (DAPF)	Bait concentration was adjusted to fit the profile to WT	2022.10.24.
BIN1	O00499	513-593	SH3	V583I	his6-MBP-TEVsite-SH3	MKI67	P46013	517-531	PxxP_13	\N	FDENLPPNTPLKRGE	bio ado ado-FDENLPPNTPLKRGE	-0.0354924	0.0516294	9	2	0	HU (DAPF)	Bait concentration was adjusted to fit the profile to WT	2022.10.24.
BIN1	O00499	513-593	SH3	V583I	his6-MBP-TEVsite-SH3	MKI67	P46013	686-700	PxxP_14	\N	NKRQRRPATPKKPVG	bio ado ado-NKRQRRPATPKKPVG	0.00652749	0.0285359	9	2	0	HU (DAPF)	Bait concentration was adjusted to fit the profile to WT	2022.10.24.
BIN1	O00499	513-593	SH3	V583I	his6-MBP-TEVsite-SH3	MUC5AC	P98088	1311-1325	PxxP_1	\N	IERRVYPCSPTTPVP	bio ado ado-IERRVYPCSPTTPVP	-0.0256408	0.034661	9	2	0	HU (DAPF)	Bait concentration was adjusted to fit the profile to WT	2022.10.24.
BIN1	O00499	513-593	SH3	V583I	his6-MBP-TEVsite-SH3	MUC5AC	P98088	1563-1577	PxxP_2	\N	VSSKPTPTEPSTSSC	bio ado ado-VSSKPTPTEPSTSSC	0.0301055	0.0655589	9	2	0	HU (DAPF)	Bait concentration was adjusted to fit the profile to WT	2022.10.24.
BIN1	O00499	513-593	SH3	V583I	his6-MBP-TEVsite-SH3	MUC5AC	P98088	1936-1950	PxxP_3	\N	VSSKPTPTEPSTSSC	bio ado ado-VSSKPTPTEPSTSSC	0.0228268	0.0335594	9	2	0	HU (DAPF)	Bait concentration was adjusted to fit the profile to WT	2022.10.24.
BIN1	O00499	513-593	SH3	V583I	his6-MBP-TEVsite-SH3	MUC5AC	P98088	5643-5657	PxxP_4	\N	SWERGVPVSPMH---	bio ado ado-SWERGVPVSPMH---	0.0432096	0.117591	9	2	0	HU (DAPF)	Bait concentration was adjusted to fit the profile to WT	2022.10.24.
BIN1	O00499	513-593	SH3	V583I	his6-MBP-TEVsite-SH3	NOLC1	Q14978	193-207	PxxP_1	\N	KAQTKAPPKPARAAP	bio ado ado-KAQTKAPPKPARAAP	0.0256504	0.00848236	9	2	0	HU (DAPF)	Bait concentration was adjusted to fit the profile to WT	2022.10.24.
BIN1	O00499	513-593	SH3	V583I	his6-MBP-TEVsite-SH3	PKN1	Q16512	565-579	PxxP_1	\N	KSSRDPPSSPSSLSS	bio ado ado-KSSRDPPSSPSSLSS	-0.0428827	0.0576221	9	2	0	HU (DAPF)	Bait concentration was adjusted to fit the profile to WT	2022.10.24.
BIN1	O00499	513-593	SH3	V583I	his6-MBP-TEVsite-SH3	PPP1R12A	O14974	401-415	PxxP_1	\N	SSGQATPTSPIKKFP	bio ado ado-SSGQATPTSPIKKFP	0.0213931	0.0222466	9	2	0	HU (DAPF)	Bait concentration was adjusted to fit the profile to WT	2022.10.24.
BIN1	O00499	513-593	SH3	V583I	his6-MBP-TEVsite-SH3	PPP1R12A	O14974	493-507	PxxP_2	\N	RLAYVAPTIPRRLAS	bio ado ado-RLAYVAPTIPRRLAS	0.0853605	0.000920113	9	2	4.03256	HU (DAPF)	Bait concentration was adjusted to fit the profile to WT	2022.10.24.
BIN1	O00499	513-593	SH3	V583I	his6-MBP-TEVsite-SH3	PRRC2A	P48634	1192-1206	PxxP_1	\N	LAPKKPPTGPLPPSK	bio ado ado-LAPKKPPTGPLPPSK	-0.0373077	0.0291342	9	2	0	HU (DAPF)	Bait concentration was adjusted to fit the profile to WT	2022.10.24.
BIN1	O00499	513-593	SH3	V583I	his6-MBP-TEVsite-SH3	PRRC2A	P48634	1195-1209	PxxP_2	\N	KKPPTGPLPPSKEPL	bio ado ado-KKPPTGPLPPSKEPL	0.00683761	0.0188606	9	2	0	HU (DAPF)	Bait concentration was adjusted to fit the profile to WT	2022.10.24.
BIN1	O00499	513-593	SH3	V583I	his6-MBP-TEVsite-SH3	PRRC2A	P48634	120-134	PxxP_3	\N	NQPKRPPAAPENTPL	bio ado ado-NQPKRPPAAPENTPL	-0.0254472	0.0382861	9	2	0	HU (DAPF)	Bait concentration was adjusted to fit the profile to WT	2022.10.24.
BIN1	O00499	513-593	SH3	V583I	his6-MBP-TEVsite-SH3	PRRC2A	P48634	1495-1509	PxxP_4	\N	GHPRHKPGLPQAPQG	bio ado ado-GHPRHKPGLPQAPQG	0.0059363	0.03975	9	2	0	HU (DAPF)	Bait concentration was adjusted to fit the profile to WT	2022.10.24.
BIN1	O00499	513-593	SH3	V583I	his6-MBP-TEVsite-SH3	PRRC2A	P48634	1506-1520	PxxP_5	\N	APQGPSPRPPTRYEP	bio ado ado-APQGPSPRPPTRYEP	-0.00345123	0.031226	9	2	0	HU (DAPF)	Bait concentration was adjusted to fit the profile to WT	2022.10.24.
BIN1	O00499	513-593	SH3	V583I	his6-MBP-TEVsite-SH3	PRRC2A	P48634	1549-1563	PxxP_6	\N	DSAGVSPFPPKRRER	bio ado ado-DSAGVSPFPPKRRER	0.362271	0.0297849	9	2	4.8764	HU (DAPF)	Bait concentration was adjusted to fit the profile to WT	2022.10.24.
BIN1	O00499	513-593	SH3	V583I	his6-MBP-TEVsite-SH3	PRRC2A	P48634	1705-1719	PxxP_7	\N	EPPRRPPPAPHDGDR	bio ado ado-EPPRRPPPAPHDGDR	-0.0287667	0.045812	9	2	0	HU (DAPF)	Bait concentration was adjusted to fit the profile to WT	2022.10.24.
BIN1	O00499	513-593	SH3	V583I	his6-MBP-TEVsite-SH3	PRRC2A	P48634	1721-1735	PxxP_8	\N	ELPREQPLPPGPIGT	bio ado ado-ELPREQPLPPGPIGT	-0.00102153	0.000344562	9	2	0	HU (DAPF)	Bait concentration was adjusted to fit the profile to WT	2022.10.24.
BIN1	O00499	513-593	SH3	V583I	his6-MBP-TEVsite-SH3	PRRC2A	P48634	261-275	PxxP_9	\N	FPPPYGPQGPYRYPT	bio ado ado-FPPPYGPQGPYRYPT	-0.021905	0.0362255	9	2	0	HU (DAPF)	Bait concentration was adjusted to fit the profile to WT	2022.10.24.
BIN1	O00499	513-593	SH3	V583I	his6-MBP-TEVsite-SH3	PRRC2A	P48634	270-284	PxxP_10	\N	PYRYPTPDGPSRFPR	bio ado ado-PYRYPTPDGPSRFPR	-0.00649556	0.0565676	9	2	0	HU (DAPF)	Bait concentration was adjusted to fit the profile to WT	2022.10.24.
BIN1	O00499	513-593	SH3	V583I	his6-MBP-TEVsite-SH3	PRRC2A	P48634	502-516	PxxP_11	\N	KRLKAEPAAPPAAPS	bio ado ado-KRLKAEPAAPPAAPS	-0.00582485	0.012591	9	2	0	HU (DAPF)	Bait concentration was adjusted to fit the profile to WT	2022.10.24.
BIN1	O00499	513-593	SH3	V583I	his6-MBP-TEVsite-SH3	PRRC2A	P48634	523-537	PxxP_12	\N	AVPKELPAPPAPPPA	bio ado ado-AVPKELPAPPAPPPA	-0.0166009	0.0339209	9	2	0	HU (DAPF)	Bait concentration was adjusted to fit the profile to WT	2022.10.24.
BIN1	O00499	513-593	SH3	V583I	his6-MBP-TEVsite-SH3	PRRC2A	P48634	585-599	PxxP_13	\N	EASPVEPQLPSKEGP	bio ado ado-EASPVEPQLPSKEGP	0.00954381	9.21683e-05	9	2	0	HU (DAPF)	Bait concentration was adjusted to fit the profile to WT	2022.10.24.
BIN1	O00499	513-593	SH3	V583I	his6-MBP-TEVsite-SH3	PRRC2A	P48634	593-607	PxxP_14	\N	LPSKEGPEPPEEVPP	bio ado ado-LPSKEGPEPPEEVPP	-0.0299988	0.0442525	9	2	0	HU (DAPF)	Bait concentration was adjusted to fit the profile to WT	2022.10.24.
BIN1	O00499	513-593	SH3	V583I	his6-MBP-TEVsite-SH3	PRRC2A	P48634	690-704	PxxP_15	\N	VPAPQAPPPPPKALY	bio ado ado-VPAPQAPPPPPKALY	-0.00270246	0.00598466	9	2	0	HU (DAPF)	Bait concentration was adjusted to fit the profile to WT	2022.10.24.
BIN1	O00499	513-593	SH3	V583I	his6-MBP-TEVsite-SH3	PRRC2A	P48634	707-721	PxxP_16	\N	ALGRPPPMPPMNFDP	bio ado ado-ALGRPPPMPPMNFDP	-0.0115085	0.0246196	9	2	0	HU (DAPF)	Bait concentration was adjusted to fit the profile to WT	2022.10.24.
BIN1	O00499	513-593	SH3	V583I	his6-MBP-TEVsite-SH3	PRRC2A	P48634	859-873	PxxP_17	\N	PGPRPLPWPPGSDEV	bio ado ado-PGPRPLPWPPGSDEV	-0.0576999	0.0100007	9	2	0	HU (DAPF)	Bait concentration was adjusted to fit the profile to WT	2022.10.24.
BIN1	O00499	513-593	SH3	V583I	his6-MBP-TEVsite-SH3	PRRC2A	P48634	907-921	PxxP_18	\N	GSGGQGPPPPRRESR	bio ado ado-GSGGQGPPPPRRESR	0.0181109	0.0327819	9	2	0	HU (DAPF)	Bait concentration was adjusted to fit the profile to WT	2022.10.24.
BIN1	O00499	513-593	SH3	V583I	his6-MBP-TEVsite-SH3	PRRC2A	P48634	936-950	PxxP_19	\N	GIPPEEPGAPPRRAG	bio ado ado-GIPPEEPGAPPRRAG	0.0239796	0.0273029	9	2	0	HU (DAPF)	Bait concentration was adjusted to fit the profile to WT	2022.10.24.
BIN1	O00499	513-593	SH3	V583I	his6-MBP-TEVsite-SH3	PRRC2A	P48634	949-963	PxxP_20	\N	AGPIKKPPPPTKVEE	bio ado ado-AGPIKKPPPPTKVEE	-0.00799288	0.0221829	9	2	0	HU (DAPF)	Bait concentration was adjusted to fit the profile to WT	2022.10.24.
BIN1	O00499	513-593	SH3	V583I	his6-MBP-TEVsite-SH3	PRRC2C	Q9Y520	1053-1067	PxxP_1	\N	TEKKDLPPPPPPPQP	bio ado ado-TEKKDLPPPPPPPQP	-0.0105252	0.0486135	9	2	0	HU (DAPF)	Bait concentration was adjusted to fit the profile to WT	2022.10.24.
BIN1	O00499	513-593	SH3	V583I	his6-MBP-TEVsite-SH3	PRRC2C	Q9Y520	1226-1240	PxxP_2	\N	PRAEHIPSGPLRQRE	bio ado ado-PRAEHIPSGPLRQRE	-0.0314771	0.0435937	9	2	0	HU (DAPF)	Bait concentration was adjusted to fit the profile to WT	2022.10.24.
BIN1	O00499	513-593	SH3	V583I	his6-MBP-TEVsite-SH3	PRRC2C	Q9Y520	1419-1433	PxxP_3	\N	RPRRQRPTRPPRQDK	bio ado ado-RPRRQRPTRPPRQDK	0.49083	0.0422645	9	4	5.1367	HU (DAPF)	Bait concentration was adjusted to fit the profile to WT	2022.10.24.
BIN1	O00499	513-593	SH3	V583I	his6-MBP-TEVsite-SH3	PRRC2C	Q9Y520	1630-1644	PxxP_4	\N	EDPKPGPKKPKEKVD	bio ado ado-EDPKPGPKKPKEKVD	-0.0110912	0.0667379	9	2	0	HU (DAPF)	Bait concentration was adjusted to fit the profile to WT	2022.10.24.
BIN1	O00499	513-593	SH3	V583I	his6-MBP-TEVsite-SH3	PRRC2C	Q9Y520	2005-2019	PxxP_5	\N	ISKKLGPISPPQPPS	bio ado ado-ISKKLGPISPPQPPS	0.00951519	0.0188295	9	2	0	HU (DAPF)	Bait concentration was adjusted to fit the profile to WT	2022.10.24.
BIN1	O00499	513-593	SH3	V583I	his6-MBP-TEVsite-SH3	PRRC2C	Q9Y520	2877-2891	PxxP_6	\N	KPVRTGPIKPQAIKT	bio ado ado-KPVRTGPIKPQAIKT	0.00699782	0.0139741	9	2	0	HU (DAPF)	Bait concentration was adjusted to fit the profile to WT	2022.10.24.
BIN1	O00499	513-593	SH3	V583I	his6-MBP-TEVsite-SH3	PRRC2C	Q9Y520	596-610	PxxP_7	\N	LEEKIEPREPNLEPM	bio ado ado-LEEKIEPREPNLEPM	-0.00816894	0.00619325	9	2	0	HU (DAPF)	Bait concentration was adjusted to fit the profile to WT	2022.10.24.
BIN1	O00499	513-593	SH3	V583I	his6-MBP-TEVsite-SH3	PRRC2C	Q9Y520	704-718	PxxP_8	\N	PSSSTVPPPPHRPLY	bio ado ado-PSSSTVPPPPHRPLY	-0.00144911	0.0233852	9	2	0	HU (DAPF)	Bait concentration was adjusted to fit the profile to WT	2022.10.24.
BIN1	O00499	513-593	SH3	V583I	his6-MBP-TEVsite-SH3	RB1	P06400	244-258	PxxP_1	\N	IPINGSPRTPRRGQN	bio ado ado-IPINGSPRTPRRGQN	0.0183917	0.0216147	9	2	0	HU (DAPF)	Bait concentration was adjusted to fit the profile to WT	2022.10.24.
BIN1	O00499	513-593	SH3	V583I	his6-MBP-TEVsite-SH3	RB1	P06400	365-379	PxxP_2	\N	EVNVIPPHTPVRTVM	bio ado ado-EVNVIPPHTPVRTVM	-0.014292	0.0155667	9	2	0	HU (DAPF)	Bait concentration was adjusted to fit the profile to WT	2022.10.24.
BIN1	O00499	513-593	SH3	V583I	his6-MBP-TEVsite-SH3	RB1	P06400	780-794	PxxP_3	\N	SPIPHIPRSPYKFPS	bio ado ado-SPIPHIPRSPYKFPS	-0.0627912	0.0323503	9	2	0	HU (DAPF)	Bait concentration was adjusted to fit the profile to WT	2022.10.24.
BIN1	O00499	513-593	SH3	V583I	his6-MBP-TEVsite-SH3	RB1	P06400	787-801	PxxP_4	\N	RSPYKFPSSPLRIPG	bio ado ado-RSPYKFPSSPLRIPG	0.0261927	0.0330154	9	2	0	HU (DAPF)	Bait concentration was adjusted to fit the profile to WT	2022.10.24.
BIN1	O00499	513-593	SH3	V583I	his6-MBP-TEVsite-SH3	RB1	P06400	862-876	PxxP_5	\N	SAEGSNPPKPLKKLR	bio ado ado-SAEGSNPPKPLKKLR	0.0234037	0.0518015	9	2	0	HU (DAPF)	Bait concentration was adjusted to fit the profile to WT	2022.10.24.
BIN1	O00499	513-593	SH3	V583I	his6-MBP-TEVsite-SH3	SH3KBP1	Q96B97	360-374	PxxP_1	\N	EIKKIPPERPEMLPN	bio ado ado-EIKKIPPERPEMLPN	0.0166839	0.008	9	2	0	HU (DAPF)	Bait concentration was adjusted to fit the profile to WT	2022.10.24.
BIN1	O00499	513-593	SH3	V583I	his6-MBP-TEVsite-SH3	SH3KBP1	Q96B97	390-404	PxxP_2	\N	LQKPSVPAIPPKKPR	bio ado ado-LQKPSVPAIPPKKPR	0.235802	0.0281143	9	2	4.58318	HU (DAPF)	Bait concentration was adjusted to fit the profile to WT	2022.10.24.
BIN1	O00499	513-593	SH3	V583I	his6-MBP-TEVsite-SH3	SH3KBP1	Q96B97	413-427	PxxP_3	\N	RPGALPPRRPERPVG	bio ado ado-RPGALPPRRPERPVG	0.0182526	0.0087964	9	2	0	HU (DAPF)	Bait concentration was adjusted to fit the profile to WT	2022.10.24.
BIN1	O00499	513-593	SH3	V583I	his6-MBP-TEVsite-SH3	SMCHD1	A6NHR9	1139-1153	PxxP_1	\N	FTVRPLPDEPKHLKC	bio ado ado-FTVRPLPDEPKHLKC	-0.00414467	0.0414157	9	2	0	HU (DAPF)	Bait concentration was adjusted to fit the profile to WT	2022.10.24.
BIN1	O00499	513-593	SH3	V583I	his6-MBP-TEVsite-SH3	SMCHD1	A6NHR9	1977-1991	PxxP_2	\N	VETTDCPVPPKRMRR	bio ado ado-VETTDCPVPPKRMRR	0.712836	0.00942139	9	2	5.60608	HU (DAPF)	Bait concentration was adjusted to fit the profile to WT	2022.10.24.
BIN1	O00499	513-593	SH3	V583I	his6-MBP-TEVsite-SH3	SMCHD1	A6NHR9	437-451	PxxP_3	\N	ETYPDDPCFPSKLKD	bio ado ado-ETYPDDPCFPSKLKD	-0.00908719	0.0617536	9	2	0	HU (DAPF)	Bait concentration was adjusted to fit the profile to WT	2022.10.24.
BIN1	O00499	513-593	SH3	V583I	his6-MBP-TEVsite-SH3	SRRM1	Q8IYB3	327-341	PxxP_1	\N	TPPRRMPPPPRHRRS	bio ado ado-TPPRRMPPPPRHRRS	0.353044	0.00167415	9	2	4.85684	HU (DAPF)	Bait concentration was adjusted to fit the profile to WT	2022.10.24.
BIN1	O00499	513-593	SH3	V583I	his6-MBP-TEVsite-SH3	SRRM1	Q8IYB3	365-379	PxxP_2	\N	SRSRSPPKKPPKRTS	bio ado ado-SRSRSPPKKPPKRTS	0.373875	0.0173768	9	4	4.90074	HU (DAPF)	Bait concentration was adjusted to fit the profile to WT	2022.10.24.
BIN1	O00499	513-593	SH3	V583I	his6-MBP-TEVsite-SH3	SRRM1	Q8IYB3	395-409	PxxP_3	\N	PRRRHRPSPPATPPP	bio ado ado-PRRRHRPSPPATPPP	0.209752	0.023517	9	2	4.5122	HU (DAPF)	Bait concentration was adjusted to fit the profile to WT	2022.10.24.
BIN1	O00499	513-593	SH3	V583I	his6-MBP-TEVsite-SH3	SRRM1	Q8IYB3	544-558	PxxP_4	\N	GRRRRSPSPPPTRRR	bio ado ado-GRRRRSPSPPPTRRR	0.5498	0.0783621	9	2	5.25424	HU (DAPF)	Bait concentration was adjusted to fit the profile to WT	2022.10.24.
BIN1	O00499	513-593	SH3	V583I	his6-MBP-TEVsite-SH3	SRRM1	Q8IYB3	557-571	PxxP_5	\N	RRRSPSPAPPPRRRR	bio ado ado-RRRSPSPAPPPRRRR	0.845122	0.00896913	9	2	5.98723	HU (DAPF)	Bait concentration was adjusted to fit the profile to WT	2022.10.24.
BIN1	O00499	513-593	SH3	V583I	his6-MBP-TEVsite-SH3	SRRM1	Q8IYB3	567-581	PxxP_6	\N	PRRRRTPTPPPRRRT	bio ado ado-PRRRRTPTPPPRRRT	0.829943	0.0278425	9	4	5.93409	HU (DAPF)	Bait concentration was adjusted to fit the profile to WT	2022.10.24.
BIN1	O00499	513-593	SH3	V583I	his6-MBP-TEVsite-SH3	SRRM1	Q8IYB3	576-590	PxxP_7	\N	PPRRRTPSPPPRRRS	bio ado ado-PPRRRTPSPPPRRRS	0.812842	0.00177227	9	4	5.87823	HU (DAPF)	Bait concentration was adjusted to fit the profile to WT	2022.10.24.
BIN1	O00499	513-593	SH3	V583I	his6-MBP-TEVsite-SH3	SRRM1	Q8IYB3	600-614	PxxP_8	\N	IQRRYSPSPPPKRRT	bio ado ado-IQRRYSPSPPPKRRT	0.430598	0.0102938	9	4	5.01667	HU (DAPF)	Bait concentration was adjusted to fit the profile to WT	2022.10.24.
BIN1	O00499	513-593	SH3	V583I	his6-MBP-TEVsite-SH3	SRRM1	Q8IYB3	611-625	PxxP_9	\N	KRRTASPPPPPKRRA	bio ado ado-KRRTASPPPPPKRRA	0.422114	0.00950608	9	2	4.99958	HU (DAPF)	Bait concentration was adjusted to fit the profile to WT	2022.10.24.
BIN1	O00499	513-593	SH3	V583I	his6-MBP-TEVsite-SH3	SRRM1	Q8IYB3	612-626	PxxP_10	\N	RRTASPPPPPKRRAS	bio ado ado-RRTASPPPPPKRRAS	0.451102	0.00982216	9	2	5.05772	HU (DAPF)	Bait concentration was adjusted to fit the profile to WT	2022.10.24.
BIN1	O00499	513-593	SH3	V583I	his6-MBP-TEVsite-SH3	SRRM1	Q8IYB3	621-635	PxxP_11	\N	PKRRASPSPPPKRRV	bio ado ado-PKRRASPSPPPKRRV	0.479623	0.039628	9	4	5.11446	HU (DAPF)	Bait concentration was adjusted to fit the profile to WT	2022.10.24.
BIN1	O00499	513-593	SH3	V583I	his6-MBP-TEVsite-SH3	SRRM1	Q8IYB3	759-773	PxxP_12	\N	PAAKKPPAPPSPVQS	bio ado ado-PAAKKPPAPPSPVQS	0.0050231	0.000984256	9	2	0	HU (DAPF)	Bait concentration was adjusted to fit the profile to WT	2022.10.24.
BIN1	O00499	513-593	SH3	V583I	his6-MBP-TEVsite-SH3	SRRM1	Q8IYB3	776-790	PxxP_13	\N	PSTNWSPAVPVKKAK	bio ado ado-PSTNWSPAVPVKKAK	0.00813823	0.0286601	9	2	0	HU (DAPF)	Bait concentration was adjusted to fit the profile to WT	2022.10.24.
BIN1	O00499	513-593	SH3	V583I	his6-MBP-TEVsite-SH3	SRRM2	Q9UQ35	1405-1419	PxxP_1	\N	PVLDAVPRTPSRERS	bio ado ado-PVLDAVPRTPSRERS	-0.0567438	0.00107295	9	2	0	HU (DAPF)	Bait concentration was adjusted to fit the profile to WT	2022.10.24.
BIN1	O00499	513-593	SH3	V583I	his6-MBP-TEVsite-SH3	SRRM2	Q9UQ35	1426-1440	PxxP_2	\N	EMKDGLPRTPSRRSR	bio ado ado-EMKDGLPRTPSRRSR	0.395005	0.00220642	9	2	4.94445	HU (DAPF)	Bait concentration was adjusted to fit the profile to WT	2022.10.24.
BIN1	O00499	513-593	SH3	V583I	his6-MBP-TEVsite-SH3	SRRM2	Q9UQ35	1464-1478	PxxP_3	\N	PGMKDIPRTPSRGRS	bio ado ado-PGMKDIPRTPSRGRS	0.0372286	0.0230063	9	4	0	HU (DAPF)	Bait concentration was adjusted to fit the profile to WT	2022.10.24.
BIN1	O00499	513-593	SH3	V583I	his6-MBP-TEVsite-SH3	SRRM2	Q9UQ35	1484-1498	PxxP_4	\N	PEPKALPQTPRPRSR	bio ado ado-PEPKALPQTPRPRSR	0.0603056	0.0755195	9	2	3.86493	HU (DAPF)	Bait concentration was adjusted to fit the profile to WT	2022.10.24.
BIN1	O00499	513-593	SH3	V583I	his6-MBP-TEVsite-SH3	SRRM2	Q9UQ35	1653-1667	PxxP_5	\N	SSTESSPEHPPKSRT	bio ado ado-SSTESSPEHPPKSRT	-0.0297999	0.0322796	9	2	0	HU (DAPF)	Bait concentration was adjusted to fit the profile to WT	2022.10.24.
BIN1	O00499	513-593	SH3	V583I	his6-MBP-TEVsite-SH3	SRRM2	Q9UQ35	2029-2043	PxxP_6	\N	RSRSRTPLLPRKRSR	bio ado ado-RSRSRTPLLPRKRSR	0.524983	0.00905857	9	2	5.20458	HU (DAPF)	Bait concentration was adjusted to fit the profile to WT	2022.10.24.
BIN1	O00499	513-593	SH3	V583I	his6-MBP-TEVsite-SH3	SRRM2	Q9UQ35	2405-2419	PxxP_7	\N	ARSRTPPSAPSQSRM	bio ado ado-ARSRTPPSAPSQSRM	-7.0796e-05	0.0266725	9	2	0	HU (DAPF)	Bait concentration was adjusted to fit the profile to WT	2022.10.24.
BIN1	O00499	513-593	SH3	V583I	his6-MBP-TEVsite-SH3	SRRM2	Q9UQ35	2656-2670	PxxP_8	\N	PQALPKPASPKKPPP	bio ado ado-PQALPKPASPKKPPP	0.00199641	0.0497736	9	2	0	HU (DAPF)	Bait concentration was adjusted to fit the profile to WT	2022.10.24.
BIN1	O00499	513-593	SH3	V583I	his6-MBP-TEVsite-SH3	SRRM2	Q9UQ35	400-414	PxxP_9	\N	TRDRSPPKSPEKLPQ	bio ado ado-TRDRSPPKSPEKLPQ	-0.00468101	0.0303976	9	4	0	HU (DAPF)	Bait concentration was adjusted to fit the profile to WT	2022.10.24.
BIN1	O00499	513-593	SH3	V583I	his6-MBP-TEVsite-SH3	SRRM2	Q9UQ35	975-989	PxxP_10	\N	PDTKVKPETPPRQSH	bio ado ado-PDTKVKPETPPRQSH	0.0284155	0.0415716	9	4	0	HU (DAPF)	Bait concentration was adjusted to fit the profile to WT	2022.10.24.
BIN1	O00499	513-593	SH3	V583I	his6-MBP-TEVsite-SH3	SUB1	P53999	27-41	PxxP_1	\N	RKKQVAPEKPVKKQK	bio ado ado-RKKQVAPEKPVKKQK	0.0551284	0.0870605	9	2	3.82253	HU (DAPF)	Bait concentration was adjusted to fit the profile to WT	2022.10.24.
BIN1	O00499	513-593	SH3	V583I	his6-MBP-TEVsite-SH3	TTF2	Q9UNY4	401-415	PxxP_1	\N	VSKKVEPSDPVARRV	bio ado ado-VSKKVEPSDPVARRV	0.00960012	0.0105838	9	2	0	HU (DAPF)	Bait concentration was adjusted to fit the profile to WT	2022.10.24.
BIN1	O00499	513-593	SH3	V583I	his6-MBP-TEVsite-SH3	TUBGCP2	Q9BSJ2	876-890	PxxP_1	\N	RSQKATPQVPVLRGP	bio ado ado-RSQKATPQVPVLRGP	0.0276318	6.12523e-05	9	2	0	HU (DAPF)	Bait concentration was adjusted to fit the profile to WT	2022.10.24.
BIN1	O00499	513-593	SH3	V583I	his6-MBP-TEVsite-SH3	ZC3H14	Q6PJT7	329-343	PxxP_1	\N	SSSVSVPAKPERRPS	bio ado ado-SSSVSVPAKPERRPS	0.0104955	0.0177364	9	2	0	HU (DAPF)	Bait concentration was adjusted to fit the profile to WT	2022.10.24.
BIN1	O00499	513-593	SH3	R581C	his6-MBP-TEVsite-SH3	ABL2	P42684	615-629	PxxP_1	\N	QASSGSPALPRKQRD	Bio Ado Ado-QASSGSPALPRKQRD-CONH2	-0.0168193	\N	10	1	0	HU (DAPF)	Bait concentration was adjusted to fit the profile to WT	2023/01/18
BIN1	O00499	513-593	SH3	R581C	his6-MBP-TEVsite-SH3	ABL2	P42684	657-671	PxxP_2	\N	MKKRNAPTPPKRSSS	Bio Ado Ado-MKKRNAPTPPKRSSS-CONH2	0.444304	0.00796397	10	2	4.98316	HU (DAPF)	Bait concentration was adjusted to fit the profile to WT	2023/01/18
BIN1	O00499	513-593	SH3	R581C	his6-MBP-TEVsite-SH3	ABL2	P42684	915-929	PxxP_3	\N	SPAKAAPVLPTTHNH	Bio Ado Ado-SPAKAAPVLPTTHNH-CONH2	-0.037877	\N	10	1	0	HU (DAPF)	Bait concentration was adjusted to fit the profile to WT	2023/01/18
BIN1	O00499	513-593	SH3	R581C	his6-MBP-TEVsite-SH3	ABL2	P42684	978-992	PxxP_4	\N	VKPKCAPPPPPVMRL	Bio Ado Ado-VKPKCAPPPPPVMRL-CONH2	0.0347873	\N	10	1	0	HU (DAPF)	Bait concentration was adjusted to fit the profile to WT	2023/01/18
BIN1	O00499	513-593	SH3	R581C	his6-MBP-TEVsite-SH3	AGAP2	Q99490	176-190	PxxP_1	\N	RRLKVAPPPPAPKPC	Bio Ado Ado-RRLKVAPPPPAPKPC-CONH2	0.0756178	\N	10	1	3.92543	HU (DAPF)	Bait concentration was adjusted to fit the profile to WT	2023/01/18
BIN1	O00499	513-593	SH3	R581C	his6-MBP-TEVsite-SH3	AGAP2	Q99490	577-591	PxxP_2	\N	AACKSLPSSPSHSAA	Bio Ado Ado-AACKSLPSSPSHSAA-CONH2	-0.0286634	\N	10	1	0	HU (DAPF)	Bait concentration was adjusted to fit the profile to WT	2023/01/18
BIN1	O00499	513-593	SH3	R581C	his6-MBP-TEVsite-SH3	AGAP2	Q99490	819-833	PxxP_3	\N	PLSREPPPSPMVKKQ	Bio Ado Ado-PLSREPPPSPMVKKQ-CONH2	-0.00698611	\N	10	1	0	HU (DAPF)	Bait concentration was adjusted to fit the profile to WT	2023/01/18
BIN1	O00499	513-593	SH3	R581C	his6-MBP-TEVsite-SH3	AGAP2	Q99490	91-105	PxxP_4	\N	PALSPAPASPARPVS	Bio Ado Ado-PALSPAPASPARPVS-CONH2	0.00102701	\N	10	1	0	HU (DAPF)	Bait concentration was adjusted to fit the profile to WT	2023/01/18
BIN1	O00499	513-593	SH3	R581C	his6-MBP-TEVsite-SH3	ANKS1A	Q92625	314-328	PxxP_1	\N	EVDKTPPPQPPLISS	Bio Ado Ado-EVDKTPPPQPPLISS-CONH2	0.00295744	\N	10	1	0	HU (DAPF)	Bait concentration was adjusted to fit the profile to WT	2023/01/18
BIN1	O00499	513-593	SH3	R581C	his6-MBP-TEVsite-SH3	ANKS1A	Q92625	401-415	PxxP_2	\N	VRPRERPPPPAKPPP	Bio Ado Ado-VRPRERPPPPAKPPP-CONH2	-0.0183922	0.00327288	10	2	0	HU (DAPF)	Bait concentration was adjusted to fit the profile to WT	2023/01/18
BIN1	O00499	513-593	SH3	R581C	his6-MBP-TEVsite-SH3	ANKS1A	Q92625	832-846	PxxP_3	\N	RPYEEPPQKPPRFSQ	Bio Ado Ado-RPYEEPPQKPPRFSQ-CONH2	0.137849	\N	10	1	4.22719	HU (DAPF)	Bait concentration was adjusted to fit the profile to WT	2023/01/18
BIN1	O00499	513-593	SH3	R581C	his6-MBP-TEVsite-SH3	ANKS1A	Q92625	885-899	PxxP_4	\N	HDSLHDPAAPSRAER	Bio Ado Ado-HDSLHDPAAPSRAER-CONH2	-0.0433053	\N	10	1	0	HU (DAPF)	Bait concentration was adjusted to fit the profile to WT	2023/01/18
BIN1	O00499	513-593	SH3	R581C	his6-MBP-TEVsite-SH3	ANLN	Q9NQW6	315-329	PxxP_1	\N	ELLPKTPISPLKTGV	Bio Ado Ado-ELLPKTPISPLKTGV-CONH2	0.00788278	\N	10	1	0	HU (DAPF)	Bait concentration was adjusted to fit the profile to WT	2023/01/18
BIN1	O00499	513-593	SH3	R581C	his6-MBP-TEVsite-SH3	APBB1IP	Q7Z5R6	512-526	PxxP_1	\N	PKSSLPPPPPVRRSS	Bio Ado Ado-PKSSLPPPPPVRRSS-CONH2	0.232267	\N	10	1	4.52091	HU (DAPF)	Bait concentration was adjusted to fit the profile to WT	2023/01/18
BIN1	O00499	513-593	SH3	R581C	his6-MBP-TEVsite-SH3	APBB1IP	Q7Z5R6	526-540	PxxP_2	\N	SDTSGSPATPLKAKG	Bio Ado Ado-SDTSGSPATPLKAKG-CONH2	-0.00306306	\N	10	1	0	HU (DAPF)	Bait concentration was adjusted to fit the profile to WT	2023/01/18
BIN1	O00499	513-593	SH3	R581C	his6-MBP-TEVsite-SH3	APBB1IP	Q7Z5R6	621-635	PxxP_3	\N	PAVAKRPPVPPKRQE	Bio Ado Ado-PAVAKRPPVPPKRQE-CONH2	0.173303	\N	10	1	4.35105	HU (DAPF)	Bait concentration was adjusted to fit the profile to WT	2023/01/18
BIN1	O00499	513-593	SH3	R581C	his6-MBP-TEVsite-SH3	APBB1IP	Q7Z5R6	622-636	PxxP_4	\N	AVAKRPPVPPKRQEN	Bio Ado Ado-AVAKRPPVPPKRQEN-CONH2	0.173126	0.0071665	10	2	4.35048	HU (DAPF)	Bait concentration was adjusted to fit the profile to WT	2023/01/18
BIN1	O00499	513-593	SH3	R581C	his6-MBP-TEVsite-SH3	ARAP1	Q96P48	109-123	PxxP_1	\N	EGLPAAPPIPPRRSC	Bio Ado Ado-EGLPAAPPIPPRRSC-CONH2	0.658131	\N	10	1	5.40944	HU (DAPF)	Bait concentration was adjusted to fit the profile to WT	2023/01/18
BIN1	O00499	513-593	SH3	R581C	his6-MBP-TEVsite-SH3	ARAP1	Q96P48	110-124	PxxP_2	\N	GLPAAPPIPPRRSCL	Bio Ado Ado-GLPAAPPIPPRRSCL-CONH2	0.487161	\N	10	1	5.0666	HU (DAPF)	Bait concentration was adjusted to fit the profile to WT	2023/01/18
BIN1	O00499	513-593	SH3	R581C	his6-MBP-TEVsite-SH3	ARAP1	Q96P48	136-150	PxxP_3	\N	APDPVLPPLPAKRHL	Bio Ado Ado-APDPVLPPLPAKRHL-CONH2	0.0404955	\N	10	1	0	HU (DAPF)	Bait concentration was adjusted to fit the profile to WT	2023/01/18
BIN1	O00499	513-593	SH3	R581C	his6-MBP-TEVsite-SH3	ARAP1	Q96P48	150-164	PxxP_4	\N	LAELSVPPVPPRTGP	Bio Ado Ado-LAELSVPPVPPRTGP-CONH2	0.0241427	\N	10	1	0	HU (DAPF)	Bait concentration was adjusted to fit the profile to WT	2023/01/18
BIN1	O00499	513-593	SH3	R581C	his6-MBP-TEVsite-SH3	ARAP1	Q96P48	207-221	PxxP_5	\N	SPPPCPPEIPPKPVR	Bio Ado Ado-SPPPCPPEIPPKPVR-CONH2	0.0644051	\N	10	1	3.84859	HU (DAPF)	Bait concentration was adjusted to fit the profile to WT	2023/01/18
BIN1	O00499	513-593	SH3	R581C	his6-MBP-TEVsite-SH3	ARAP1	Q96P48	210-224	PxxP_6	\N	PCPPEIPPKPVRLFP	Bio Ado Ado-PCPPEIPPKPVRLFP-CONH2	-0.0189534	\N	10	1	0	HU (DAPF)	Bait concentration was adjusted to fit the profile to WT	2023/01/18
BIN1	O00499	513-593	SH3	R581C	his6-MBP-TEVsite-SH3	ARAP1	Q96P48	233-247	PxxP_7	\N	EVPEEGPGAPARVMT	Bio Ado Ado-EVPEEGPGAPARVMT-CONH2	0.00289079	\N	10	1	0	HU (DAPF)	Bait concentration was adjusted to fit the profile to WT	2023/01/18
BIN1	O00499	513-593	SH3	R581C	his6-MBP-TEVsite-SH3	ARHGAP17	Q68EM7	662-676	PxxP_2	\N	HPPSLSPKPPTRSPS	Bio E E Ado Ado-HPPSLSPKPPTRSPS-CONH2	-0.031154	\N	10	1	0	HU (DAPF)	Bait concentration was adjusted to fit the profile to WT	2023/01/18
BIN1	O00499	513-593	SH3	R581C	his6-MBP-TEVsite-SH3	ARHGAP45	Q92619	1106-1120	PxxP_1	\N	NNVLQAPLPPMRLRG	Bio E E Ado Ado-NNVLQAPLPPMRLRG-CONH2	0.284003	\N	10	1	4.64801	HU (DAPF)	Bait concentration was adjusted to fit the profile to WT	2023/01/18
BIN1	O00499	513-593	SH3	R581C	his6-MBP-TEVsite-SH3	ATAT1	Q5SQI0	210-224	PxxP_1	\N	AAVDPTPAAPARKLP	Bio Ado Ado-AAVDPTPAAPARKLP-CONH2	0.0428319	\N	10	1	0	HU (DAPF)	Bait concentration was adjusted to fit the profile to WT	2023/01/18
BIN1	O00499	513-593	SH3	R581C	his6-MBP-TEVsite-SH3	ATAT1	Q5SQI0	293-307	PxxP_2	\N	RSLRLCPPHPTARLL	Bio Ado Ado-RSLRLCPPHPTARLL-CONH2	0.0425527	\N	10	1	0	HU (DAPF)	Bait concentration was adjusted to fit the profile to WT	2023/01/18
BIN1	O00499	513-593	SH3	R581C	his6-MBP-TEVsite-SH3	ATXN2	Q99700	112-126	PxxP_1	\N	ASPGAPPAAPTRASP	Bio Ado Ado-ASPGAPPAAPTRASP-CONH2	0.0156042	\N	10	1	0	HU (DAPF)	Bait concentration was adjusted to fit the profile to WT	2023/01/18
BIN1	O00499	513-593	SH3	R581C	his6-MBP-TEVsite-SH3	ATXN2	Q99700	139-153	PxxP_2	\N	SLARPAPGCPRPACE	Bio Ado Ado-SLARPAPGCPRPACE-CONH2	-0.0117878	\N	10	1	0	HU (DAPF)	Bait concentration was adjusted to fit the profile to WT	2023/01/18
BIN1	O00499	513-593	SH3	R581C	his6-MBP-TEVsite-SH3	ATXN2	Q99700	583-597	PxxP_3	\N	RPPSRPPSRPSRPPS	Bio Ado Ado-RPPSRPPSRPSRPPS-CONH2	0.0595385	\N	10	1	3.8114	HU (DAPF)	Bait concentration was adjusted to fit the profile to WT	2023/01/18
BIN1	O00499	513-593	SH3	R581C	his6-MBP-TEVsite-SH3	ATXN2	Q99700	995-1009	PxxP_4	\N	KTYRAVPNMPQQRQD	Bio Ado Ado-KTYRAVPNMPQQRQD-CONH2	-0.00537874	\N	10	1	0	HU (DAPF)	Bait concentration was adjusted to fit the profile to WT	2023/01/18
BIN1	O00499	513-593	SH3	R581C	his6-MBP-TEVsite-SH3	BIRC6	Q9NR09	3927-3941	PxxP_1	\N	AVSATPPRPPSRRGR	Bio Ado Ado-AVSATPPRPPSRRGR-CONH2	0.639511	\N	10	1	5.36987	HU (DAPF)	Bait concentration was adjusted to fit the profile to WT	2023/01/18
BIN1	O00499	513-593	SH3	R581C	his6-MBP-TEVsite-SH3	BUD13	Q9BRD0	219-233	PxxP_2	\N	RHDSPDPSPPRRARH	Bio E E Ado Ado-RHDSPDPSPPRRARH-CONH2	0.206656	\N	10	1	4.4513	HU (DAPF)	Bait concentration was adjusted to fit the profile to WT	2023/01/18
BIN1	O00499	513-593	SH3	R581C	his6-MBP-TEVsite-SH3	C19orf47	Q8N9M1	147-161	PxxP_1	\N	LNHDSPPSTPPRRPD	Bio Ado Ado-LNHDSPPSTPPRRPD-CONH2	0.00966392	\N	10	1	0	HU (DAPF)	Bait concentration was adjusted to fit the profile to WT	2023/01/18
BIN1	O00499	513-593	SH3	R581C	his6-MBP-TEVsite-SH3	CAMSAP1	Q5T5Y3	1359-1373	PxxP_1	\N	GKPKSKPKKPRPKSV	Bio Ado Ado-GKPKSKPKKPRPKSV-CONH2	0.014486	\N	10	1	0	HU (DAPF)	Bait concentration was adjusted to fit the profile to WT	2023/01/18
BIN1	O00499	513-593	SH3	R581C	his6-MBP-TEVsite-SH3	CAMSAP1	Q5T5Y3	1586-1600	PxxP_2	\N	LWQPKRPAVPKKAQT	Bio Ado Ado-LWQPKRPAVPKKAQT-CONH2	0.0245563	\N	10	1	0	HU (DAPF)	Bait concentration was adjusted to fit the profile to WT	2023/01/18
BIN1	O00499	513-593	SH3	R581C	his6-MBP-TEVsite-SH3	CAMSAP1	Q5T5Y3	414-428	PxxP_3	\N	AFSPSHPLLPLRQKQ	Bio Ado Ado-AFSPSHPLLPLRQKQ-CONH2	0.0328142	\N	10	1	0	HU (DAPF)	Bait concentration was adjusted to fit the profile to WT	2023/01/18
BIN1	O00499	513-593	SH3	R581C	his6-MBP-TEVsite-SH3	CAPRIN1	Q14444	687-701	PxxP_1	\N	PRGRGGPPRPNRGMP	Bio Ado Ado-PRGRGGPPRPNRGMP-CONH2	0.0239477	0.0121856	10	2	0	HU (DAPF)	Bait concentration was adjusted to fit the profile to WT	2023/01/18
BIN1	O00499	513-593	SH3	R581C	his6-MBP-TEVsite-SH3	CARMIL2	Q6F5E8	1030-1044	PxxP_1	\N	HHHRPPPGGPQVPPA	Bio Ado Ado-HHHRPPPGGPQVPPA-CONH2	-0.018913	\N	10	1	0	HU (DAPF)	Bait concentration was adjusted to fit the profile to WT	2023/01/18
BIN1	O00499	513-593	SH3	R581C	his6-MBP-TEVsite-SH3	CARMIL2	Q6F5E8	1133-1147	PxxP_2	\N	GDLLRPPTRPSRGEE	Bio Ado Ado-GDLLRPPTRPSRGEE-CONH2	-0.00205024	\N	10	1	0	HU (DAPF)	Bait concentration was adjusted to fit the profile to WT	2023/01/18
BIN1	O00499	513-593	SH3	R581C	his6-MBP-TEVsite-SH3	CARMIL2	Q6F5E8	1408-1422	PxxP_3	\N	PPQPTEPSSPERSPP	Bio Ado Ado-PPQPTEPSSPERSPP-CONH2	-0.016938	\N	10	1	0	HU (DAPF)	Bait concentration was adjusted to fit the profile to WT	2023/01/18
BIN1	O00499	513-593	SH3	R581C	his6-MBP-TEVsite-SH3	CASKIN2	Q8WXE0	1121-1135	PxxP_1	\N	PRLGPRPVPPPRPES	Bio Ado Ado-PRLGPRPVPPPRPES-CONH2	0.0543661	\N	10	1	3.76867	HU (DAPF)	Bait concentration was adjusted to fit the profile to WT	2023/01/18
BIN1	O00499	513-593	SH3	R581C	his6-MBP-TEVsite-SH3	CASKIN2	Q8WXE0	683-697	PxxP_2	\N	GGPEPLPLPPARSPS	Bio Ado Ado-GGPEPLPLPPARSPS-CONH2	0.000918868	\N	10	1	0	HU (DAPF)	Bait concentration was adjusted to fit the profile to WT	2023/01/18
BIN1	O00499	513-593	SH3	R581C	his6-MBP-TEVsite-SH3	CASKIN2	Q8WXE0	782-796	PxxP_3	\N	AGPPATPPDPPRPKR	Bio Ado Ado-AGPPATPPDPPRPKR-CONH2	0.061098	\N	10	1	3.82361	HU (DAPF)	Bait concentration was adjusted to fit the profile to WT	2023/01/18
BIN1	O00499	513-593	SH3	R581C	his6-MBP-TEVsite-SH3	CASKIN2	Q8WXE0	785-799	PxxP_4	\N	PATPPDPPRPKRRSH	Bio Ado Ado-PATPPDPPRPKRRSH-CONH2	0.14027	\N	10	1	4.23639	HU (DAPF)	Bait concentration was adjusted to fit the profile to WT	2023/01/18
BIN1	O00499	513-593	SH3	R581C	his6-MBP-TEVsite-SH3	CASKIN2	Q8WXE0	862-876	PxxP_5	\N	RARRKGPPPPPPKRL	Bio Ado Ado-RARRKGPPPPPPKRL-CONH2	0.40526	\N	10	1	4.90604	HU (DAPF)	Bait concentration was adjusted to fit the profile to WT	2023/01/18
BIN1	O00499	513-593	SH3	R581C	his6-MBP-TEVsite-SH3	CASKIN2	Q8WXE0	863-877	PxxP_6	\N	ARRKGPPPPPPKRLS	Bio Ado Ado-ARRKGPPPPPPKRLS-CONH2	0.308662	0.00899787	10	2	4.70398	HU (DAPF)	Bait concentration was adjusted to fit the profile to WT	2023/01/18
BIN1	O00499	513-593	SH3	R581C	his6-MBP-TEVsite-SH3	CASKIN2	Q8WXE0	864-878	PxxP_7	\N	RRKGPPPPPPKRLSS	Bio Ado Ado-RRKGPPPPPPKRLSS-CONH2	0.30282	\N	10	1	4.69093	HU (DAPF)	Bait concentration was adjusted to fit the profile to WT	2023/01/18
BIN1	O00499	513-593	SH3	R581C	his6-MBP-TEVsite-SH3	CASKIN2	Q8WXE0	960-974	PxxP_8	\N	IKQRPKPAGPPPRET	Bio Ado Ado-IKQRPKPAGPPPRET-CONH2	0.0348689	\N	10	1	0	HU (DAPF)	Bait concentration was adjusted to fit the profile to WT	2023/01/18
BIN1	O00499	513-593	SH3	R581C	his6-MBP-TEVsite-SH3	CASKIN2	Q8WXE0	969-983	PxxP_9	\N	PPPRETPVPPGLDFN	Bio Ado Ado-PPPRETPVPPGLDFN-CONH2	0.00498624	\N	10	1	0	HU (DAPF)	Bait concentration was adjusted to fit the profile to WT	2023/01/18
BIN1	O00499	513-593	SH3	R581C	his6-MBP-TEVsite-SH3	CAST	P20810	12-26	PxxP_1	\N	SQQMEGPHLPNKKKH	Bio Ado Ado-SQQMEGPHLPNKKKH-CONH2	-0.00359076	\N	10	1	0	HU (DAPF)	Bait concentration was adjusted to fit the profile to WT	2023/01/18
BIN1	O00499	513-593	SH3	R581C	his6-MBP-TEVsite-SH3	CAST	P20810	379-393	PxxP_2	\N	SECKEKPSKPTEKTE	Bio Ado Ado-SECKEKPSKPTEKTE-CONH2	-0.0234223	\N	10	1	0	HU (DAPF)	Bait concentration was adjusted to fit the profile to WT	2023/01/18
BIN1	O00499	513-593	SH3	R581C	his6-MBP-TEVsite-SH3	CC2D1A	Q6P1N0	3-17	PxxP_1	\N	KRKGPPGPPGRGAAA	Bio Ado Ado-KRKGPPGPPGRGAAA-CONH2	-0.0502691	0.0261557	10	3	0	HU (DAPF)	Bait concentration was adjusted to fit the profile to WT	2023/01/18
BIN1	O00499	513-593	SH3	R581C	his6-MBP-TEVsite-SH3	CD2AP	Q9Y5K6	335-349	PxxP_1	\N	FPKPKKPPPPAKAPA	Bio Ado Ado-FPKPKKPPPPAKAPA-CONH2	-0.0488941	\N	10	1	0	HU (DAPF)	Bait concentration was adjusted to fit the profile to WT	2023/01/18
BIN1	O00499	513-593	SH3	R581C	his6-MBP-TEVsite-SH3	CD2AP	Q9Y5K6	379-393	PxxP_2	\N	PSKPAAPQVPPKKPT	Bio Ado Ado-PSKPAAPQVPPKKPT-CONH2	0.0283115	\N	10	1	0	HU (DAPF)	Bait concentration was adjusted to fit the profile to WT	2023/01/18
BIN1	O00499	513-593	SH3	R581C	his6-MBP-TEVsite-SH3	CD2AP	Q9Y5K6	386-400	PxxP_3	\N	QVPPKKPTPPTKASN	Bio Ado Ado-QVPPKKPTPPTKASN-CONH2	0.0321101	\N	10	1	0	HU (DAPF)	Bait concentration was adjusted to fit the profile to WT	2023/01/18
BIN1	O00499	513-593	SH3	R581C	his6-MBP-TEVsite-SH3	CD2AP	Q9Y5K6	404-418	PxxP_4	\N	SSGTVYPKRPEKPVP	Bio Ado Ado-SSGTVYPKRPEKPVP-CONH2	-0.028886	\N	10	1	0	HU (DAPF)	Bait concentration was adjusted to fit the profile to WT	2023/01/18
BIN1	O00499	513-593	SH3	R581C	his6-MBP-TEVsite-SH3	CD2AP	Q9Y5K6	412-426	PxxP_5	\N	RPEKPVPPPPPIAKI	Bio Ado Ado-RPEKPVPPPPPIAKI-CONH2	0.0159945	\N	10	1	0	HU (DAPF)	Bait concentration was adjusted to fit the profile to WT	2023/01/18
BIN1	O00499	513-593	SH3	R581C	his6-MBP-TEVsite-SH3	CD2AP	Q9Y5K6	488-502	PxxP_6	\N	HLTANRPKMPGRRLP	Bio Ado Ado-HLTANRPKMPGRRLP-CONH2	0.0294703	\N	10	1	0	HU (DAPF)	Bait concentration was adjusted to fit the profile to WT	2023/01/18
BIN1	O00499	513-593	SH3	R581C	his6-MBP-TEVsite-SH3	CD3EAP	O15446	317-331	PxxP_1	\N	PLEEAIPLPPTKKRK	Bio Ado Ado-PLEEAIPLPPTKKRK-CONH2	0.0111659	\N	10	1	0	HU (DAPF)	Bait concentration was adjusted to fit the profile to WT	2023/01/18
BIN1	O00499	513-593	SH3	R581C	his6-MBP-TEVsite-SH3	CDC27	P30260	396-410	PxxP_1	\N	LKMKFPPKIPNRKTK	Bio E E Ado Ado-LKMKFPPKIPNRKTK-CONH2	0.516074	\N	10	1	5.12274	HU (DAPF)	Bait concentration was adjusted to fit the profile to WT	2023/01/18
BIN1	O00499	513-593	SH3	R581C	his6-MBP-TEVsite-SH3	CDT1	Q9H211	48-62	PxxP_1	\N	RKRARPPAAPGRDQA	Bio Ado Ado-RKRARPPAAPGRDQA-CONH2	0.0296238	\N	10	1	0	HU (DAPF)	Bait concentration was adjusted to fit the profile to WT	2023/01/18
BIN1	O00499	513-593	SH3	R581C	his6-MBP-TEVsite-SH3	CDT1	Q9H211	9-23	PxxP_2	\N	FFARRRPGPPRIAPP	Bio Ado Ado-FFARRRPGPPRIAPP-CONH2	0.0264617	\N	10	1	0	HU (DAPF)	Bait concentration was adjusted to fit the profile to WT	2023/01/18
BIN1	O00499	513-593	SH3	R581C	his6-MBP-TEVsite-SH3	CENPT	Q96BT3	19-33	PxxP_1	\N	VLDTADPRTPRRPRS	Bio Ado Ado-VLDTADPRTPRRPRS-CONH2	-0.0228505	\N	10	1	0	HU (DAPF)	Bait concentration was adjusted to fit the profile to WT	2023/01/18
BIN1	O00499	513-593	SH3	R581C	his6-MBP-TEVsite-SH3	CENPT	Q96BT3	283-297	PxxP_2	\N	GLQKNSPGKPAQFLA	Bio Ado Ado-GLQKNSPGKPAQFLA-CONH2	-0.0738363	\N	10	1	0	HU (DAPF)	Bait concentration was adjusted to fit the profile to WT	2023/01/18
BIN1	O00499	513-593	SH3	R581C	his6-MBP-TEVsite-SH3	CEP170	Q5SW79	640-654	PxxP_1	\N	RRRRTLPQLPNEEKS	Bio Ado Ado-RRRRTLPQLPNEEKS-CONH2	0.302962	\N	10	1	4.69125	HU (DAPF)	Bait concentration was adjusted to fit the profile to WT	2023/01/18
BIN1	O00499	513-593	SH3	R581C	his6-MBP-TEVsite-SH3	CEP170	Q5SW79	840-854	PxxP_2	\N	TIEKPSPNIPIELIP	Bio Ado Ado-TIEKPSPNIPIELIP-CONH2	-0.0536725	\N	10	1	0	HU (DAPF)	Bait concentration was adjusted to fit the profile to WT	2023/01/18
BIN1	O00499	513-593	SH3	R581C	his6-MBP-TEVsite-SH3	CIZ1	Q9ULV3	881-895	PxxP_1	\N	TARPSQPPLPRRSTR	Bio Ado Ado-TARPSQPPLPRRSTR-CONH2	0.171876	\N	10	1	4.34645	HU (DAPF)	Bait concentration was adjusted to fit the profile to WT	2023/01/18
BIN1	O00499	513-593	SH3	R581C	his6-MBP-TEVsite-SH3	CPSF7	Q8N684	45-59	PxxP_1	\N	RSSSTEPPPPVRQEP	Bio Ado Ado-RSSSTEPPPPVRQEP-CONH2	-0.0724266	\N	10	1	0	HU (DAPF)	Bait concentration was adjusted to fit the profile to WT	2023/01/18
BIN1	O00499	513-593	SH3	R581C	his6-MBP-TEVsite-SH3	DCAF12	Q5T6F0	7-21	PxxP_1	\N	SRKRKAPASPGAGSD	Bio Ado Ado-SRKRKAPASPGAGSD-CONH2	-0.0424937	\N	10	1	0	HU (DAPF)	Bait concentration was adjusted to fit the profile to WT	2023/01/18
BIN1	O00499	513-593	SH3	R581C	his6-MBP-TEVsite-SH3	DENND1A	Q8TEH3	553-567	PxxP_1	\N	KSTGPVPAPPDRAAS	Bio Ado Ado-KSTGPVPAPPDRAAS-CONH2	-0.0621808	\N	10	1	0	HU (DAPF)	Bait concentration was adjusted to fit the profile to WT	2023/01/18
BIN1	O00499	513-593	SH3	R581C	his6-MBP-TEVsite-SH3	DENND1A	Q8TEH3	942-956	PxxP_2	\N	LRPGDPPLLPPRPPQ	Bio Ado Ado-LRPGDPPLLPPRPPQ-CONH2	-0.0160098	\N	10	1	0	HU (DAPF)	Bait concentration was adjusted to fit the profile to WT	2023/01/18
BIN1	O00499	513-593	SH3	R581C	his6-MBP-TEVsite-SH3	DIDO1	Q9BTC0	441-455	PxxP_1	\N	EKMKMKPEKPSLPKC	Bio Ado Ado-EKMKMKPEKPSLPKC-CONH2	-0.0513248	\N	10	1	0	HU (DAPF)	Bait concentration was adjusted to fit the profile to WT	2023/01/18
BIN1	O00499	513-593	SH3	R581C	his6-MBP-TEVsite-SH3	DNM2	P50570	826-840	PxxP_4	\N	PAPPQIPSRPVRIPP	Bio E E Ado Ado-PAPPQIPSRPVRIPP-CONH2	0.0704711	\N	10	1	3.89154	HU (DAPF)	Bait concentration was adjusted to fit the profile to WT	2023/01/18
BIN1	O00499	513-593	SH3	R581C	his6-MBP-TEVsite-SH3	DNM2	P50570	838-852	PxxP_6	\N	IPPGIPPGVPSRRPP	Bio E E Ado Ado-IPPGIPPGVPSRRPP-CONH2	0.061648	\N	10	1	3.82785	HU (DAPF)	Bait concentration was adjusted to fit the profile to WT	2023/01/18
BIN1	O00499	513-593	SH3	R581C	his6-MBP-TEVsite-SH3	DNMT1	P26358	129-143	PxxP_1	\N	PKPLSKPRTPRRSKS	Bio E E Ado Ado-PKPLSKPRTPRRSKS-CONH2	-0.00564315	\N	10	1	0	HU (DAPF)	Bait concentration was adjusted to fit the profile to WT	2023/01/18
BIN1	O00499	513-593	SH3	R581C	his6-MBP-TEVsite-SH3	ELMSAN1	Q6PJG2	175-189	PxxP_1	\N	LDRYVRPMMPQKVQL	Bio Ado Ado-LDRYVRPMMPQKVQL-CONH2	-0.0125324	\N	10	1	0	HU (DAPF)	Bait concentration was adjusted to fit the profile to WT	2023/01/18
BIN1	O00499	513-593	SH3	R581C	his6-MBP-TEVsite-SH3	ELMSAN1	Q6PJG2	228-242	PxxP_2	\N	QVFRQGPPPPNPVAA	Bio Ado Ado-QVFRQGPPPPNPVAA-CONH2	-0.0894054	\N	10	1	0	HU (DAPF)	Bait concentration was adjusted to fit the profile to WT	2023/01/18
BIN1	O00499	513-593	SH3	R581C	his6-MBP-TEVsite-SH3	ESPL1	Q14674	1338-1352	PxxP_1	\N	LEGRGLPCTPKPPDR	Bio Ado Ado-LEGRGLPCTPKPPDR-CONH2	0.0370065	\N	10	1	0	HU (DAPF)	Bait concentration was adjusted to fit the profile to WT	2023/01/18
BIN1	O00499	513-593	SH3	R581C	his6-MBP-TEVsite-SH3	ESPL1	Q14674	1341-1355	PxxP_2	\N	RGLPCTPKPPDRIRQ	Bio Ado Ado-RGLPCTPKPPDRIRQ-CONH2	0.210666	\N	10	1	4.46257	HU (DAPF)	Bait concentration was adjusted to fit the profile to WT	2023/01/18
BIN1	O00499	513-593	SH3	R581C	his6-MBP-TEVsite-SH3	EZH2	Q15910	341-355	PxxP_1	\N	ERIKTPPKRPGGRRR	Bio E E Ado Ado-ERIKTPPKRPGGRRR-CONH2	0.0289207	\N	10	1	0	HU (DAPF)	Bait concentration was adjusted to fit the profile to WT	2023/01/18
BIN1	O00499	513-593	SH3	R581C	his6-MBP-TEVsite-SH3	FKBPL	Q9UIM3	33-47	PxxP_1	\N	IQIRQQPRDPPTETL	Bio Ado Ado-IQIRQQPRDPPTETL-CONH2	0.00270457	\N	10	1	0	HU (DAPF)	Bait concentration was adjusted to fit the profile to WT	2023/01/18
BIN1	O00499	513-593	SH3	R581C	his6-MBP-TEVsite-SH3	G3BP2	Q9UN86	231-245	PxxP_1	\N	AEPVSLPQEPPKAFS	Bio Ado Ado-AEPVSLPQEPPKAFS-CONH2	-0.0303783	\N	10	1	0	HU (DAPF)	Bait concentration was adjusted to fit the profile to WT	2023/01/18
BIN1	O00499	513-593	SH3	R581C	his6-MBP-TEVsite-SH3	G3BP2	Q9UN86	294-308	PxxP_2	\N	QRPRERPGFPPRGPR	Bio Ado Ado-QRPRERPGFPPRGPR-CONH2	0.0193131	0.0335655	10	2	0	HU (DAPF)	Bait concentration was adjusted to fit the profile to WT	2023/01/18
BIN1	O00499	513-593	SH3	R581C	his6-MBP-TEVsite-SH3	GAR1	Q9NY12	153-167	PxxP_1	\N	PLQRFLPRPPGEKGP	Bio Ado Ado-PLQRFLPRPPGEKGP-CONH2	0.0041002	\N	10	1	0	HU (DAPF)	Bait concentration was adjusted to fit the profile to WT	2023/01/18
BIN1	O00499	513-593	SH3	R581C	his6-MBP-TEVsite-SH3	GAS2L1	Q99501	166-180	PxxP_1	\N	RELRAAPPAPNAPAA	Bio Ado Ado-RELRAAPPAPNAPAA-CONH2	-0.0229553	\N	10	1	0	HU (DAPF)	Bait concentration was adjusted to fit the profile to WT	2023/01/18
BIN1	O00499	513-593	SH3	R581C	his6-MBP-TEVsite-SH3	GAS2L1	Q99501	185-199	PxxP_2	\N	TETAPAPGTPARGPR	Bio Ado Ado-TETAPAPGTPARGPR-CONH2	0.0543417	\N	10	1	3.76846	HU (DAPF)	Bait concentration was adjusted to fit the profile to WT	2023/01/18
BIN1	O00499	513-593	SH3	R581C	his6-MBP-TEVsite-SH3	GAS2L1	Q99501	326-340	PxxP_3	\N	RSTKEGPETPPRPRD	Bio Ado Ado-RSTKEGPETPPRPRD-CONH2	-0.0185925	0.0048075	10	2	0	HU (DAPF)	Bait concentration was adjusted to fit the profile to WT	2023/01/18
BIN1	O00499	513-593	SH3	R581C	his6-MBP-TEVsite-SH3	GAS2L1	Q99501	386-400	PxxP_4	\N	RLTTGTPASPRRPPA	Bio Ado Ado-RLTTGTPASPRRPPA-CONH2	-0.051127	\N	10	1	0	HU (DAPF)	Bait concentration was adjusted to fit the profile to WT	2023/01/18
BIN1	O00499	513-593	SH3	R581C	his6-MBP-TEVsite-SH3	GAS2L1	Q99501	466-480	PxxP_5	\N	GSGRSTPQTPRARSP	Bio Ado Ado-GSGRSTPQTPRARSP-CONH2	-0.0707163	\N	10	1	0	HU (DAPF)	Bait concentration was adjusted to fit the profile to WT	2023/01/18
BIN1	O00499	513-593	SH3	R581C	his6-MBP-TEVsite-SH3	GAS2L1	Q99501	644-658	PxxP_6	\N	PSRIPTPRGPRRPSG	Bio Ado Ado-PSRIPTPRGPRRPSG-CONH2	0.0542693	\N	10	1	3.76784	HU (DAPF)	Bait concentration was adjusted to fit the profile to WT	2023/01/18
BIN1	O00499	513-593	SH3	R581C	his6-MBP-TEVsite-SH3	GLCCI1	Q86VQ1	140-154	PxxP_1	\N	SPERRSPGSPVCRAD	Bio Ado Ado-SPERRSPGSPVCRAD-CONH2	-0.0288378	\N	10	1	0	HU (DAPF)	Bait concentration was adjusted to fit the profile to WT	2023/01/18
BIN1	O00499	513-593	SH3	R581C	his6-MBP-TEVsite-SH3	GPATCH8	Q9UKJ3	602-616	PxxP_1	\N	HLQGLDPGEPNKSKE	Bio Ado Ado-HLQGLDPGEPNKSKE-CONH2	-0.053827	\N	10	1	0	HU (DAPF)	Bait concentration was adjusted to fit the profile to WT	2023/01/18
BIN1	O00499	513-593	SH3	R581C	his6-MBP-TEVsite-SH3	GPATCH8	Q9UKJ3	735-749	PxxP_2	\N	PPGSGSPAPPRRRRR	Bio Ado Ado-PPGSGSPAPPRRRRR-CONH2	0.709135	\N	10	1	5.5234	HU (DAPF)	Bait concentration was adjusted to fit the profile to WT	2023/01/18
BIN1	O00499	513-593	SH3	R581C	his6-MBP-TEVsite-SH3	GTSE1	Q9NYZ3	235-249	PxxP_1	\N	KPKKEIPASPSRTKI	Bio Ado Ado-KPKKEIPASPSRTKI-CONH2	-0.0304757	0.00214468	10	2	0	HU (DAPF)	Bait concentration was adjusted to fit the profile to WT	2023/01/18
BIN1	O00499	513-593	SH3	R581C	his6-MBP-TEVsite-SH3	HNRNPK	P61978	285-299	PxxP_4	\N	PRRGPPPPPPGRGGR	Bio E E Ado Ado-PRRGPPPPPPGRGGR-CONH2	0.338878	\N	10	1	4.76963	HU (DAPF)	Bait concentration was adjusted to fit the profile to WT	2023/01/18
BIN1	O00499	513-593	SH3	R581C	his6-MBP-TEVsite-SH3	IFRD2	Q12894	57-71	PxxP_1	\N	RPPRPVPGMPRARKG	Bio Ado Ado-RPPRPVPGMPRARKG-CONH2	0.102722	\N	10	1	4.07603	HU (DAPF)	Bait concentration was adjusted to fit the profile to WT	2023/01/18
BIN1	O00499	513-593	SH3	R581C	his6-MBP-TEVsite-SH3	IQSEC1	Q6DN90	435-449	PxxP_1	\N	PELRPRPPRPLDSHL	Bio Ado Ado-PELRPRPPRPLDSHL-CONH2	-0.000235726	\N	10	1	0	HU (DAPF)	Bait concentration was adjusted to fit the profile to WT	2023/01/18
BIN1	O00499	513-593	SH3	R581C	his6-MBP-TEVsite-SH3	ITCH	Q96J02	244-258	PxxP_1	\N	SNGGFKPSRPPRPSR	Bio Ado Ado-SNGGFKPSRPPRPSR-CONH2	0.613597	\N	10	1	5.31614	HU (DAPF)	Bait concentration was adjusted to fit the profile to WT	2023/01/18
BIN1	O00499	513-593	SH3	R581C	his6-MBP-TEVsite-SH3	ITCH	Q96J02	247-261	PxxP_2	\N	GFKPSRPPRPSRPPP	Bio Ado Ado-GFKPSRPPRPSRPPP-CONH2	0.557436	\N	10	1	5.2036	HU (DAPF)	Bait concentration was adjusted to fit the profile to WT	2023/01/18
BIN1	O00499	513-593	SH3	R581C	his6-MBP-TEVsite-SH3	ITCH	Q96J02	255-269	PxxP_3	\N	RPSRPPPPTPRRPAS	Bio Ado Ado-RPSRPPPPTPRRPAS-CONH2	0.12842	0.00985656	10	2	4.19005	HU (DAPF)	Bait concentration was adjusted to fit the profile to WT	2023/01/18
BIN1	O00499	513-593	SH3	R581C	his6-MBP-TEVsite-SH3	ITCH	Q96J02	353-367	PxxP_4	\N	TWDRPEPLPPGWERR	Bio Ado Ado-TWDRPEPLPPGWERR-CONH2	-0.0893459	\N	10	1	0	HU (DAPF)	Bait concentration was adjusted to fit the profile to WT	2023/01/18
BIN1	O00499	513-593	SH3	R581C	his6-MBP-TEVsite-SH3	KATNB1	Q9BVA0	323-337	PxxP_1	\N	AQPLPNPSAPLRRIY	Bio Ado Ado-AQPLPNPSAPLRRIY-CONH2	0.169477	\N	10	1	4.33867	HU (DAPF)	Bait concentration was adjusted to fit the profile to WT	2023/01/18
BIN1	O00499	513-593	SH3	R581C	his6-MBP-TEVsite-SH3	KDM2A	Q9Y2K7	545-559	PxxP_1	\N	PAPRLTPVRPAAASP	Bio Ado Ado-PAPRLTPVRPAAASP-CONH2	0.00313738	\N	10	1	0	HU (DAPF)	Bait concentration was adjusted to fit the profile to WT	2023/01/18
BIN1	O00499	513-593	SH3	R581C	his6-MBP-TEVsite-SH3	KDM2B	Q8NHM5	1041-1055	PxxP_1	\N	HVIRPPPISPPPDSL	Bio Ado Ado-HVIRPPPISPPPDSL-CONH2	0.00654434	\N	10	1	0	HU (DAPF)	Bait concentration was adjusted to fit the profile to WT	2023/01/18
BIN1	O00499	513-593	SH3	R581C	his6-MBP-TEVsite-SH3	KDM2B	Q8NHM5	892-906	PxxP_2	\N	EPEDELPEAPPKTRE	Bio Ado Ado-EPEDELPEAPPKTRE-CONH2	-0.00544972	\N	10	1	0	HU (DAPF)	Bait concentration was adjusted to fit the profile to WT	2023/01/18
BIN1	O00499	513-593	SH3	R581C	his6-MBP-TEVsite-SH3	KIF2C	Q99661	140-154	PxxP_1	\N	RKQFSVPPAPTRPSC	Bio Ado Ado-RKQFSVPPAPTRPSC-CONH2	0.00984002	\N	10	1	0	HU (DAPF)	Bait concentration was adjusted to fit the profile to WT	2023/01/18
BIN1	O00499	513-593	SH3	R581C	his6-MBP-TEVsite-SH3	KIFC1	Q9BW19	104-118	PxxP_1	\N	KNQKPVPAVPVQKSG	Bio Ado Ado-KNQKPVPAVPVQKSG-CONH2	0.0185062	\N	10	1	0	HU (DAPF)	Bait concentration was adjusted to fit the profile to WT	2023/01/18
BIN1	O00499	513-593	SH3	R581C	his6-MBP-TEVsite-SH3	KIFC1	Q9BW19	358-372	PxxP_2	\N	GTLSGAPAPPTRHDF	Bio Ado Ado-GTLSGAPAPPTRHDF-CONH2	-0.00124372	\N	10	1	0	HU (DAPF)	Bait concentration was adjusted to fit the profile to WT	2023/01/18
BIN1	O00499	513-593	SH3	R581C	his6-MBP-TEVsite-SH3	LENG1	Q96BZ8	184-198	PxxP_1	\N	GSEKQRPKEPPSLDQ	Bio Ado Ado-GSEKQRPKEPPSLDQ-CONH2	-0.023098	\N	10	1	0	HU (DAPF)	Bait concentration was adjusted to fit the profile to WT	2023/01/18
BIN1	O00499	513-593	SH3	R581C	his6-MBP-TEVsite-SH3	LMNB1	P20700	15-29	PxxP_1	\N	AGGPTTPLSPTRLSR	Bio Ado Ado-AGGPTTPLSPTRLSR-CONH2	0.0500988	\N	10	1	3.7305	HU (DAPF)	Bait concentration was adjusted to fit the profile to WT	2023/01/18
BIN1	O00499	513-593	SH3	R581C	his6-MBP-TEVsite-SH3	LRRC41	Q15345	352-366	PxxP_1	\N	PGTKRSPSAPAATSS	Bio Ado Ado-PGTKRSPSAPAATSS-CONH2	0.015519	\N	10	1	0	HU (DAPF)	Bait concentration was adjusted to fit the profile to WT	2023/01/18
BIN1	O00499	513-593	SH3	R581C	his6-MBP-TEVsite-SH3	LRRC41	Q15345	560-574	PxxP_2	\N	PSQRDNPGVPGNAGP	Bio Ado Ado-PSQRDNPGVPGNAGP-CONH2	0.00145037	\N	10	1	0	HU (DAPF)	Bait concentration was adjusted to fit the profile to WT	2023/01/18
BIN1	O00499	513-593	SH3	R581C	his6-MBP-TEVsite-SH3	LUZP1	Q86V48	1062-1076	PxxP_1	\N	AEERLRPTRPCAEEN	Bio Ado Ado-AEERLRPTRPCAEEN-CONH2	0.00952528	\N	10	1	0	HU (DAPF)	Bait concentration was adjusted to fit the profile to WT	2023/01/18
BIN1	O00499	513-593	SH3	R581C	his6-MBP-TEVsite-SH3	MAP2K7	O14733	285-299	PxxP_1	\N	APERIDPPDPTKPDY	Bio Ado Ado-APERIDPPDPTKPDY-CONH2	0.0199663	0.00817954	10	2	0	HU (DAPF)	Bait concentration was adjusted to fit the profile to WT	2023/01/18
BIN1	O00499	513-593	SH3	R581C	his6-MBP-TEVsite-SH3	MAP2K7	O14733	59-73	PxxP_2	\N	ESSPQHPTPPARPRH	Bio Ado Ado-ESSPQHPTPPARPRH-CONH2	0.133157	\N	10	1	4.20897	HU (DAPF)	Bait concentration was adjusted to fit the profile to WT	2023/01/18
BIN1	O00499	513-593	SH3	R581C	his6-MBP-TEVsite-SH3	MAP4K5	Q9Y4K4	384-398	PxxP_1	\N	SKRAIPPPLPPKPRI	Bio Ado Ado-SKRAIPPPLPPKPRI-CONH2	-0.0125796	\N	10	1	0	HU (DAPF)	Bait concentration was adjusted to fit the profile to WT	2023/01/18
BIN1	O00499	513-593	SH3	R581C	his6-MBP-TEVsite-SH3	MAP4K5	Q9Y4K4	461-475	PxxP_2	\N	EGSAQAPQLPRKKDK	Bio Ado Ado-EGSAQAPQLPRKKDK-CONH2	-0.0256308	\N	10	1	0	HU (DAPF)	Bait concentration was adjusted to fit the profile to WT	2023/01/18
BIN1	O00499	513-593	SH3	R581C	his6-MBP-TEVsite-SH3	MDC1	Q14676	1040-1054	PxxP_1	\N	PTVPEAPAPPQKPLN	Bio Ado Ado-PTVPEAPAPPQKPLN-CONH2	0.0133851	\N	10	1	0	HU (DAPF)	Bait concentration was adjusted to fit the profile to WT	2023/01/18
BIN1	O00499	513-593	SH3	R581C	his6-MBP-TEVsite-SH3	MDC1	Q14676	990-1004	PxxP_2	\N	SGGRGSPVSPRRHQK	Bio Ado Ado-SGGRGSPVSPRRHQK-CONH2	0.0659365	0.00624077	10	2	3.85977	HU (DAPF)	Bait concentration was adjusted to fit the profile to WT	2023/01/18
BIN1	O00499	513-593	SH3	R581C	his6-MBP-TEVsite-SH3	MICALL1	Q8N3F8	272-286	PxxP_1	\N	ASPEARPQIPTKPRV	Bio Ado Ado-ASPEARPQIPTKPRV-CONH2	0.0363916	\N	10	1	0	HU (DAPF)	Bait concentration was adjusted to fit the profile to WT	2023/01/18
BIN1	O00499	513-593	SH3	R581C	his6-MBP-TEVsite-SH3	MICALL1	Q8N3F8	278-292	PxxP_2	\N	PQIPTKPRVPGKLQE	Bio Ado Ado-PQIPTKPRVPGKLQE-CONH2	-0.0088181	\N	10	1	0	HU (DAPF)	Bait concentration was adjusted to fit the profile to WT	2023/01/18
BIN1	O00499	513-593	SH3	R581C	his6-MBP-TEVsite-SH3	MICALL1	Q8N3F8	379-393	PxxP_3	\N	PKKKPAPLPPSSSPG	Bio Ado Ado-PKKKPAPLPPSSSPG-CONH2	0.00130916	\N	10	1	0	HU (DAPF)	Bait concentration was adjusted to fit the profile to WT	2023/01/18
BIN1	O00499	513-593	SH3	R581C	his6-MBP-TEVsite-SH3	MICALL1	Q8N3F8	474-488	PxxP_4	\N	TKKRPAPRAPSASPL	Bio Ado Ado-TKKRPAPRAPSASPL-CONH2	0.0206668	\N	10	1	0	HU (DAPF)	Bait concentration was adjusted to fit the profile to WT	2023/01/18
BIN1	O00499	513-593	SH3	R581C	his6-MBP-TEVsite-SH3	MORC2	Q9Y6X9	620-634	PxxP_1	\N	AVIRNAPSRPPSLPT	Bio Ado Ado-AVIRNAPSRPPSLPT-CONH2	0.00912261	\N	10	1	0	HU (DAPF)	Bait concentration was adjusted to fit the profile to WT	2023/01/18
BIN1	O00499	513-593	SH3	R581C	his6-MBP-TEVsite-SH3	MORC2	Q9Y6X9	665-679	PxxP_2	\N	SRLLQPPEAPRKPAN	Bio Ado Ado-SRLLQPPEAPRKPAN-CONH2	-0.00700366	\N	10	1	0	HU (DAPF)	Bait concentration was adjusted to fit the profile to WT	2023/01/18
BIN1	O00499	513-593	SH3	R581C	his6-MBP-TEVsite-SH3	MORC2	Q9Y6X9	725-739	PxxP_3	\N	SPIKLSPATPSRKRS	Bio Ado Ado-SPIKLSPATPSRKRS-CONH2	0.135858	0.00767189	10	2	4.21952	HU (DAPF)	Bait concentration was adjusted to fit the profile to WT	2023/01/18
BIN1	O00499	513-593	SH3	R581C	his6-MBP-TEVsite-SH3	MORF4L1	Q9UBU8	163-177	PxxP_1	\N	GSTSETPQPPRKKRA	Bio Ado Ado-GSTSETPQPPRKKRA-CONH2	0.102143	\N	10	1	4.0732	HU (DAPF)	Bait concentration was adjusted to fit the profile to WT	2023/01/18
BIN1	O00499	513-593	SH3	R581C	his6-MBP-TEVsite-SH3	MORF4L2	Q15014	47-61	PxxP_1	\N	QQKNLEPALPGRWGG	Bio Ado Ado-QQKNLEPALPGRWGG-CONH2	0.0111326	\N	10	1	0	HU (DAPF)	Bait concentration was adjusted to fit the profile to WT	2023/01/18
BIN1	O00499	513-593	SH3	R581C	his6-MBP-TEVsite-SH3	MORF4L2	Q15014	89-103	PxxP_2	\N	GSTSEAPQPPRKKRA	Bio Ado Ado-GSTSEAPQPPRKKRA-CONH2	0.0412874	\N	10	1	0	HU (DAPF)	Bait concentration was adjusted to fit the profile to WT	2023/01/18
BIN1	O00499	513-593	SH3	R581C	his6-MBP-TEVsite-SH3	MRPS12	O15235	36-50	PxxP_1	\N	MHRLGPPKRPPRKLG	Bio Ado Ado-MHRLGPPKRPPRKLG-CONH2	0.559386	\N	10	1	5.20744	HU (DAPF)	Bait concentration was adjusted to fit the profile to WT	2023/01/18
BIN1	O00499	513-593	SH3	R581C	his6-MBP-TEVsite-SH3	MYBL2	P10244	525-539	PxxP_1	\N	ALEKYGPLKPLPQTP	Bio Ado Ado-ALEKYGPLKPLPQTP-CONH2	-0.0211914	\N	10	1	0	HU (DAPF)	Bait concentration was adjusted to fit the profile to WT	2023/01/18
BIN1	O00499	513-593	SH3	R581C	his6-MBP-TEVsite-SH3	MYBL2	P10244	530-544	PxxP_2	\N	GPLKPLPQTPHLEED	Bio Ado Ado-GPLKPLPQTPHLEED-CONH2	-0.0233589	\N	10	1	0	HU (DAPF)	Bait concentration was adjusted to fit the profile to WT	2023/01/18
BIN1	O00499	513-593	SH3	R581C	his6-MBP-TEVsite-SH3	NCKIPSD	Q9NZQ3	165-179	PxxP_1	\N	LPSSQIPPQPRRAAP	Bio Ado Ado-LPSSQIPPQPRRAAP-CONH2	0.011076	\N	10	1	0	HU (DAPF)	Bait concentration was adjusted to fit the profile to WT	2023/01/18
BIN1	O00499	513-593	SH3	R581C	his6-MBP-TEVsite-SH3	NCKIPSD	Q9NZQ3	173-187	PxxP_2	\N	QPRRAAPTTPPPPVK	Bio Ado Ado-QPRRAAPTTPPPPVK-CONH2	-0.0158946	\N	10	1	0	HU (DAPF)	Bait concentration was adjusted to fit the profile to WT	2023/01/18
BIN1	O00499	513-593	SH3	R581C	his6-MBP-TEVsite-SH3	NCKIPSD	Q9NZQ3	176-190	PxxP_3	\N	RAAPTTPPPPVKRRD	Bio Ado Ado-RAAPTTPPPPVKRRD-CONH2	0.00444026	\N	10	1	0	HU (DAPF)	Bait concentration was adjusted to fit the profile to WT	2023/01/18
BIN1	O00499	513-593	SH3	R581C	his6-MBP-TEVsite-SH3	NCKIPSD	Q9NZQ3	238-252	PxxP_4	\N	SCSPTPPPVPRRGTH	Bio Ado Ado-SCSPTPPPVPRRGTH-CONH2	0.232089	\N	10	1	4.52044	HU (DAPF)	Bait concentration was adjusted to fit the profile to WT	2023/01/18
BIN1	O00499	513-593	SH3	R581C	his6-MBP-TEVsite-SH3	NUP153	P49790	252-266	PxxP_1	\N	SQLGDSPFYPGKTTY	Bio Ado Ado-SQLGDSPFYPGKTTY-CONH2	0.0441315	\N	10	1	0	HU (DAPF)	Bait concentration was adjusted to fit the profile to WT	2023/01/18
BIN1	O00499	513-593	SH3	R581C	his6-MBP-TEVsite-SH3	PAN3	Q58A45	105-119	PxxP_1	\N	GGGAGPPPGPKKPDL	Bio Ado Ado-GGGAGPPPGPKKPDL-CONH2	-0.01728	\N	10	1	0	HU (DAPF)	Bait concentration was adjusted to fit the profile to WT	2023/01/18
BIN1	O00499	513-593	SH3	R581C	his6-MBP-TEVsite-SH3	PDCD6IP	Q8WUM4	746-760	PxxP_1	\N	TMPPTKPQPPARPPP	Bio Ado Ado-TMPPTKPQPPARPPP-CONH2	-0.000550333	\N	10	1	0	HU (DAPF)	Bait concentration was adjusted to fit the profile to WT	2023/01/18
BIN1	O00499	513-593	SH3	R581C	his6-MBP-TEVsite-SH3	PDS5A	Q29RF7	1256-1270	PxxP_1	\N	KVDESGPPAPSKPRR	Bio Ado Ado-KVDESGPPAPSKPRR-CONH2	0.0378413	\N	10	1	0	HU (DAPF)	Bait concentration was adjusted to fit the profile to WT	2023/01/18
BIN1	O00499	513-593	SH3	R581C	his6-MBP-TEVsite-SH3	PDS5A	Q29RF7	1259-1273	PxxP_2	\N	ESGPPAPSKPRRGRR	Bio Ado Ado-ESGPPAPSKPRRGRR-CONH2	0.33998	\N	10	1	4.77197	HU (DAPF)	Bait concentration was adjusted to fit the profile to WT	2023/01/18
BIN1	O00499	513-593	SH3	R581C	his6-MBP-TEVsite-SH3	PEX1	O43933	1156-1170	PxxP_1	\N	SMTQDLPGVPGKDQL	Bio Ado Ado-SMTQDLPGVPGKDQL-CONH2	-0.00533983	\N	10	1	0	HU (DAPF)	Bait concentration was adjusted to fit the profile to WT	2023/01/18
BIN1	O00499	513-593	SH3	R581C	his6-MBP-TEVsite-SH3	PHACTR4	Q8IZ21	161-175	PxxP_1	\N	ENVPKPPLLPPKRPL	Bio Ado Ado-ENVPKPPLLPPKRPL-CONH2	0.0249018	\N	10	1	0	HU (DAPF)	Bait concentration was adjusted to fit the profile to WT	2023/01/18
BIN1	O00499	513-593	SH3	R581C	his6-MBP-TEVsite-SH3	PHACTR4	Q8IZ21	229-243	PxxP_2	\N	PAPRTLPAAPASTNT	Bio Ado Ado-PAPRTLPAAPASTNT-CONH2	0.00161466	\N	10	1	0	HU (DAPF)	Bait concentration was adjusted to fit the profile to WT	2023/01/18
BIN1	O00499	513-593	SH3	R581C	his6-MBP-TEVsite-SH3	PHACTR4	Q8IZ21	253-267	PxxP_3	\N	VPAKQPPIPPPKPAH	Bio Ado Ado-VPAKQPPIPPPKPAH-CONH2	-0.0109921	0.0510373	10	2	0	HU (DAPF)	Bait concentration was adjusted to fit the profile to WT	2023/01/18
BIN1	O00499	513-593	SH3	R581C	his6-MBP-TEVsite-SH3	PHACTR4	Q8IZ21	286-300	PxxP_4	\N	LLSKPSPPLPPKRGI	Bio Ado Ado-LLSKPSPPLPPKRGI-CONH2	0.270808	0.00103955	10	2	4.61698	HU (DAPF)	Bait concentration was adjusted to fit the profile to WT	2023/01/18
BIN1	O00499	513-593	SH3	R581C	his6-MBP-TEVsite-SH3	PHACTR4	Q8IZ21	287-301	PxxP_5	\N	LSKPSPPLPPKRGIP	Bio Ado Ado-LSKPSPPLPPKRGIP-CONH2	0.171046	\N	10	1	4.34377	HU (DAPF)	Bait concentration was adjusted to fit the profile to WT	2023/01/18
BIN1	O00499	513-593	SH3	R581C	his6-MBP-TEVsite-SH3	PHACTR4	Q8IZ21	346-360	PxxP_6	\N	PLPTHIPPEPPRTPP	Bio Ado Ado-PLPTHIPPEPPRTPP-CONH2	-0.0711483	\N	10	1	0	HU (DAPF)	Bait concentration was adjusted to fit the profile to WT	2023/01/18
BIN1	O00499	513-593	SH3	R581C	his6-MBP-TEVsite-SH3	PHACTR4	Q8IZ21	353-367	PxxP_7	\N	PEPPRTPPFPAKTFQ	Bio Ado Ado-PEPPRTPPFPAKTFQ-CONH2	-0.00908169	\N	10	1	0	HU (DAPF)	Bait concentration was adjusted to fit the profile to WT	2023/01/18
BIN1	O00499	513-593	SH3	R581C	his6-MBP-TEVsite-SH3	PHACTR4	Q8IZ21	400-414	PxxP_8	\N	DQNFGEPHIPSRLPP	Bio Ado Ado-DQNFGEPHIPSRLPP-CONH2	-0.0839861	\N	10	1	0	HU (DAPF)	Bait concentration was adjusted to fit the profile to WT	2023/01/18
BIN1	O00499	513-593	SH3	R581C	his6-MBP-TEVsite-SH3	PI4K2B	Q8TCG2	1-12	PxxP_1	\N	___MEDPSEPDRLAS	Bio Ado Ado-___MEDPSEPDRLAS-CONH2	-0.0204935	\N	10	1	0	HU (DAPF)	Bait concentration was adjusted to fit the profile to WT	2023/01/18
BIN1	O00499	513-593	SH3	R581C	his6-MBP-TEVsite-SH3	PKMYT1	Q99640	46-60	PxxP_1	\N	GLSRSLPPPPPAKGS	Bio Ado Ado-GLSRSLPPPPPAKGS-CONH2	-0.00226874	\N	10	1	0	HU (DAPF)	Bait concentration was adjusted to fit the profile to WT	2023/01/18
BIN1	O00499	513-593	SH3	R581C	his6-MBP-TEVsite-SH3	PKMYT1	Q99640	47-61	PxxP_2	\N	LSRSLPPPPPAKGSI	Bio Ado Ado-LSRSLPPPPPAKGSI-CONH2	-0.0868391	\N	10	1	0	HU (DAPF)	Bait concentration was adjusted to fit the profile to WT	2023/01/18
BIN1	O00499	513-593	SH3	R581C	his6-MBP-TEVsite-SH3	POM121	Q96HA1	140-154	PxxP_1	\N	YLGKPGPPQPAAAPE	Bio Ado Ado-YLGKPGPPQPAAAPE-CONH2	-0.00259893	\N	10	1	0	HU (DAPF)	Bait concentration was adjusted to fit the profile to WT	2023/01/18
BIN1	O00499	513-593	SH3	R581C	his6-MBP-TEVsite-SH3	POM121	Q96HA1	161-175	PxxP_2	\N	RPGRRPPARPAPRSP	Bio Ado Ado-RPGRRPPARPAPRSP-CONH2	0.0836301	\N	10	1	3.97432	HU (DAPF)	Bait concentration was adjusted to fit the profile to WT	2023/01/18
BIN1	O00499	513-593	SH3	R581C	his6-MBP-TEVsite-SH3	POM121	Q96HA1	166-180	PxxP_3	\N	PPARPAPRSPPPRSP	Bio Ado Ado-PPARPAPRSPPPRSP-CONH2	0.0216409	\N	10	1	0	HU (DAPF)	Bait concentration was adjusted to fit the profile to WT	2023/01/18
BIN1	O00499	513-593	SH3	R581C	his6-MBP-TEVsite-SH3	POM121	Q96HA1	180-194	PxxP_4	\N	PPPRSPPPSPPTHRA	Bio Ado Ado-PPPRSPPPSPPTHRA-CONH2	-0.0632048	\N	10	1	0	HU (DAPF)	Bait concentration was adjusted to fit the profile to WT	2023/01/18
BIN1	O00499	513-593	SH3	R581C	his6-MBP-TEVsite-SH3	POM121	Q96HA1	442-456	PxxP_5	\N	SSRSQTPERPAKKIR	Bio Ado Ado-SSRSQTPERPAKKIR-CONH2	0.0965705	\N	10	1	4.04519	HU (DAPF)	Bait concentration was adjusted to fit the profile to WT	2023/01/18
BIN1	O00499	513-593	SH3	R581C	his6-MBP-TEVsite-SH3	POM121	Q96HA1	737-751	PxxP_6	\N	KSEKEGPTPPGPSVT	Bio Ado Ado-KSEKEGPTPPGPSVT-CONH2	-0.0193584	\N	10	1	0	HU (DAPF)	Bait concentration was adjusted to fit the profile to WT	2023/01/18
BIN1	O00499	513-593	SH3	R581C	his6-MBP-TEVsite-SH3	POM121C	A8CG34	127-141	PxxP_1	\N	YLGKPGPPQPAPAPE	Bio Ado Ado-YLGKPGPPQPAPAPE-CONH2	0.010982	\N	10	1	0	HU (DAPF)	Bait concentration was adjusted to fit the profile to WT	2023/01/18
BIN1	O00499	513-593	SH3	R581C	his6-MBP-TEVsite-SH3	POM121C	A8CG34	148-162	PxxP_2	\N	RPGRRPPARPAPRST	Bio Ado Ado-RPGRRPPARPAPRST-CONH2	0.118944	\N	10	1	4.15043	HU (DAPF)	Bait concentration was adjusted to fit the profile to WT	2023/01/18
BIN1	O00499	513-593	SH3	R581C	his6-MBP-TEVsite-SH3	POM121C	A8CG34	419-433	PxxP_3	\N	SSRSQTPERPAKKIR	Bio Ado Ado-SSRSQTPERPAKKIR-CONH2	-0.0201338	\N	10	1	0	HU (DAPF)	Bait concentration was adjusted to fit the profile to WT	2023/01/18
BIN1	O00499	513-593	SH3	R581C	his6-MBP-TEVsite-SH3	PPP1CA	P62136	312-326	PxxP_1	\N	LNPGGRPITPPRNSA	Bio Ado Ado-LNPGGRPITPPRNSA-CONH2	0.0649452	\N	10	1	3.85256	HU (DAPF)	Bait concentration was adjusted to fit the profile to WT	2023/01/18
BIN1	O00499	513-593	SH3	R581C	his6-MBP-TEVsite-SH3	PPP1CB	P62140	308-322	PxxP_1	\N	GLNSGRPVTPPRTAN	Bio Ado Ado-GLNSGRPVTPPRTAN-CONH2	0.056123	\N	10	1	3.78359	HU (DAPF)	Bait concentration was adjusted to fit the profile to WT	2023/01/18
BIN1	O00499	513-593	SH3	R581C	his6-MBP-TEVsite-SH3	PPP1CC	P36873	303-317	PxxP_1	\N	KPNATRPVTPPRGMI	Bio Ado Ado-KPNATRPVTPPRGMI-CONH2	0.0671515	\N	10	1	3.86847	HU (DAPF)	Bait concentration was adjusted to fit the profile to WT	2023/01/18
BIN1	O00499	513-593	SH3	R581C	his6-MBP-TEVsite-SH3	PPP1R10	Q96QC0	498-512	PxxP_1	\N	FLNKESPHEPDPEPY	Bio Ado Ado-FLNKESPHEPDPEPY-CONH2	0.0175109	\N	10	1	0	HU (DAPF)	Bait concentration was adjusted to fit the profile to WT	2023/01/18
BIN1	O00499	513-593	SH3	R581C	his6-MBP-TEVsite-SH3	PPP1R10	Q96QC0	663-677	PxxP_2	\N	GPRLLGPPPPPRGGD	Bio Ado Ado-GPRLLGPPPPPRGGD-CONH2	0.00595579	\N	10	1	0	HU (DAPF)	Bait concentration was adjusted to fit the profile to WT	2023/01/18
BIN1	O00499	513-593	SH3	R581C	his6-MBP-TEVsite-SH3	PPP1R10	Q96QC0	677-691	PxxP_3	\N	DPFWDGPGDPMRGGP	Bio Ado Ado-DPFWDGPGDPMRGGP-CONH2	-0.018099	\N	10	1	0	HU (DAPF)	Bait concentration was adjusted to fit the profile to WT	2023/01/18
BIN1	O00499	513-593	SH3	R581C	his6-MBP-TEVsite-SH3	PPP1R10	Q96QC0	712-726	PxxP_4	\N	GNEPPPPPPPFRGAR	Bio Ado Ado-GNEPPPPPPPFRGAR-CONH2	-0.0475818	\N	10	1	0	HU (DAPF)	Bait concentration was adjusted to fit the profile to WT	2023/01/18
BIN1	O00499	513-593	SH3	R581C	his6-MBP-TEVsite-SH3	PPP1R8	Q12972	97-111	PxxP_1	\N	GHIRLEPHKPQQIPI	Bio Ado Ado-GHIRLEPHKPQQIPI-CONH2	0.017796	\N	10	1	0	HU (DAPF)	Bait concentration was adjusted to fit the profile to WT	2023/01/18
BIN1	O00499	513-593	SH3	R581C	his6-MBP-TEVsite-SH3	PRC1	O43663	462-476	PxxP_1	\N	MLYGSAPRTPSKRRG	Bio Ado Ado-MLYGSAPRTPSKRRG-CONH2	0.100707	\N	10	1	4.0661	HU (DAPF)	Bait concentration was adjusted to fit the profile to WT	2023/01/18
BIN1	O00499	513-593	SH3	R581C	his6-MBP-TEVsite-SH3	PRC1	O43663	473-487	PxxP_2	\N	KRRGLAPNTPGKARK	Bio Ado Ado-KRRGLAPNTPGKARK-CONH2	0.0197325	\N	10	1	0	HU (DAPF)	Bait concentration was adjusted to fit the profile to WT	2023/01/18
BIN1	O00499	513-593	SH3	R581C	his6-MBP-TEVsite-SH3	PRR12	Q9ULL5	1215-1229	PxxP_1	\N	GGTRLEPLKPLKIKL	Bio Ado Ado-GGTRLEPLKPLKIKL-CONH2	-0.0391729	0.0165693	10	2	0	HU (DAPF)	Bait concentration was adjusted to fit the profile to WT	2023/01/18
BIN1	O00499	513-593	SH3	R581C	his6-MBP-TEVsite-SH3	PRR12	Q9ULL5	13-27	PxxP_2	BAA86519.1	HPVRPPPPPPPPMPL	Bio Ado Ado-HPVRPPPPPPPPMPL-CONH2	0.0189688	\N	10	1	0	HU (DAPF)	Bait concentration was adjusted to fit the profile to WT	2023/01/18
BIN1	O00499	513-593	SH3	R581C	his6-MBP-TEVsite-SH3	PRR12	Q9ULL5	1300-1314	PxxP_3	\N	QAGLTPPLSPPKSVP	Bio Ado Ado-QAGLTPPLSPPKSVP-CONH2	-0.031609	\N	10	1	0	HU (DAPF)	Bait concentration was adjusted to fit the profile to WT	2023/01/18
BIN1	O00499	513-593	SH3	R581C	his6-MBP-TEVsite-SH3	PRR12	Q9ULL5	1453-1467	PxxP_4	\N	LEEKPPPTPPPAPTP	Bio Ado Ado-LEEKPPPTPPPAPTP-CONH2	-0.0236953	\N	10	1	0	HU (DAPF)	Bait concentration was adjusted to fit the profile to WT	2023/01/18
BIN1	O00499	513-593	SH3	R581C	his6-MBP-TEVsite-SH3	PRR12	Q9ULL5	1664-1678	PxxP_5	\N	RKPWHRPPVPVRRSG	Bio Ado Ado-RKPWHRPPVPVRRSG-CONH2	0.500397	\N	10	1	5.09229	HU (DAPF)	Bait concentration was adjusted to fit the profile to WT	2023/01/18
BIN1	O00499	513-593	SH3	R581C	his6-MBP-TEVsite-SH3	PRR12	Q9ULL5	1691-1705	PxxP_6	\N	APPPKAPAPPPKPET	Bio Ado Ado-APPPKAPAPPPKPET-CONH2	0.00652686	\N	10	1	0	HU (DAPF)	Bait concentration was adjusted to fit the profile to WT	2023/01/18
BIN1	O00499	513-593	SH3	R581C	his6-MBP-TEVsite-SH3	PRR12	Q9ULL5	1697-1711	PxxP_7	\N	PAPPPKPETPEKTTS	Bio Ado Ado-PAPPPKPETPEKTTS-CONH2	-0.0164265	\N	10	1	0	HU (DAPF)	Bait concentration was adjusted to fit the profile to WT	2023/01/18
BIN1	O00499	513-593	SH3	R581C	his6-MBP-TEVsite-SH3	PRR12	Q9ULL5	1720-1734	PxxP_8	\N	ETAMPEPPAPEKPSL	Bio Ado Ado-ETAMPEPPAPEKPSL-CONH2	-0.00312192	\N	10	1	0	HU (DAPF)	Bait concentration was adjusted to fit the profile to WT	2023/01/18
BIN1	O00499	513-593	SH3	R581C	his6-MBP-TEVsite-SH3	PRR12	Q9ULL5	1143-1157	PxxP_9	\N	CPPNPGPDGPRRRGR	Bio Ado Ado-CPPNPGPDGPRRRGR-CONH2	0.0553544	\N	10	1	3.77712	HU (DAPF)	Bait concentration was adjusted to fit the profile to WT	2023/01/18
BIN1	O00499	513-593	SH3	R581C	his6-MBP-TEVsite-SH3	PRR12	Q9ULL5	1161-1175	PxxP_10	\N	KAKRDGPPRPRGRPR	Bio Ado Ado-KAKRDGPPRPRGRPR-CONH2	0.180077	\N	10	1	4.37247	HU (DAPF)	Bait concentration was adjusted to fit the profile to WT	2023/01/18
BIN1	O00499	513-593	SH3	R581C	his6-MBP-TEVsite-SH3	PRR12	Q9ULL5	1309-1323	PxxP_11	\N	PPKSVPPSVPARGLQ	Bio Ado Ado-PPKSVPPSVPARGLQ-CONH2	0.0870056	\N	10	1	3.99368	HU (DAPF)	Bait concentration was adjusted to fit the profile to WT	2023/01/18
BIN1	O00499	513-593	SH3	R581C	his6-MBP-TEVsite-SH3	PRR12	Q9ULL5	5-19	PxxP_12	BAA86519.1	PGVPPGPPHPVRPPP	Bio Ado Ado-PGVPPGPPHPVRPPP-CONH2	0.025662	\N	10	1	0	HU (DAPF)	Bait concentration was adjusted to fit the profile to WT	2023/01/18
BIN1	O00499	513-593	SH3	R581C	his6-MBP-TEVsite-SH3	PRR12	Q9ULL5	986-1000	PxxP_13	\N	AYDPYGPYCPGRASG	Bio Ado Ado-AYDPYGPYCPGRASG-CONH2	0.00718362	\N	10	1	0	HU (DAPF)	Bait concentration was adjusted to fit the profile to WT	2023/01/18
BIN1	O00499	513-593	SH3	R581C	his6-MBP-TEVsite-SH3	PRRC2A	P48634	907-921	PxxP_18	\N	GSGGQGPPPPRRESR	Bio E E Ado Ado-GSGGQGPPPPRRESR-CONH2	-0.0366783	\N	10	1	0	HU (DAPF)	Bait concentration was adjusted to fit the profile to WT	2023/01/18
BIN1	O00499	513-593	SH3	R581C	his6-MBP-TEVsite-SH3	PRRC2B	Q5JSZ5	251-265	PxxP_1	\N	KDPSLRPAQPVRKGA	Bio Ado Ado-KDPSLRPAQPVRKGA-CONH2	-0.00382513	\N	10	1	0	HU (DAPF)	Bait concentration was adjusted to fit the profile to WT	2023/01/18
BIN1	O00499	513-593	SH3	R581C	his6-MBP-TEVsite-SH3	PRRC2B	Q5JSZ5	306-320	PxxP_2	\N	PQLRLEPRVPFRQFQ	Bio Ado Ado-PQLRLEPRVPFRQFQ-CONH2	0.028804	0.0243497	10	2	0	HU (DAPF)	Bait concentration was adjusted to fit the profile to WT	2023/01/18
BIN1	O00499	513-593	SH3	R581C	his6-MBP-TEVsite-SH3	PRRC2B	Q5JSZ5	330-344	PxxP_3	\N	RLGLSRPLRPLRQLV	Bio Ado Ado-RLGLSRPLRPLRQLV-CONH2	0.110361	\N	10	1	4.11221	HU (DAPF)	Bait concentration was adjusted to fit the profile to WT	2023/01/18
BIN1	O00499	513-593	SH3	R581C	his6-MBP-TEVsite-SH3	PRRC2B	Q5JSZ5	445-459	PxxP_4	\N	VRKAPDPQPPPRKLH	Bio Ado Ado-VRKAPDPQPPPRKLH-CONH2	0.303412	\N	10	1	4.69226	HU (DAPF)	Bait concentration was adjusted to fit the profile to WT	2023/01/18
BIN1	O00499	513-593	SH3	R581C	his6-MBP-TEVsite-SH3	PRRC2B	Q5JSZ5	548-562	PxxP_5	\N	QAEKEVPWSPSAEKA	Bio Ado Ado-QAEKEVPWSPSAEKA-CONH2	-0.0115033	\N	10	1	0	HU (DAPF)	Bait concentration was adjusted to fit the profile to WT	2023/01/18
BIN1	O00499	513-593	SH3	R581C	his6-MBP-TEVsite-SH3	PRRC2B	Q5JSZ5	570-584	PxxP_6	\N	AVHKGSPEFPAQETP	Bio Ado Ado-AVHKGSPEFPAQETP-CONH2	-0.00975837	\N	10	1	0	HU (DAPF)	Bait concentration was adjusted to fit the profile to WT	2023/01/18
BIN1	O00499	513-593	SH3	R581C	his6-MBP-TEVsite-SH3	PRRC2B	Q5JSZ5	647-661	PxxP_7	\N	QPVYPPPSHPQRTFY	Bio Ado Ado-QPVYPPPSHPQRTFY-CONH2	0.0178339	\N	10	1	0	HU (DAPF)	Bait concentration was adjusted to fit the profile to WT	2023/01/18
BIN1	O00499	513-593	SH3	R581C	his6-MBP-TEVsite-SH3	PRRC2B	Q5JSZ5	848-862	PxxP_8	\N	QNLRCSPLEPDFVPD	Bio Ado Ado-QNLRCSPLEPDFVPD-CONH2	0.00274266	\N	10	1	0	HU (DAPF)	Bait concentration was adjusted to fit the profile to WT	2023/01/18
BIN1	O00499	513-593	SH3	R581C	his6-MBP-TEVsite-SH3	PRRC2C	Q9Y520	1419-1433	PxxP_3	\N	RPRRQRPTRPPRQDK	Bio E E Ado Ado-RPRRQRPTRPPRQDK-CONH2	0.387336	\N	10	1	4.87001	HU (DAPF)	Bait concentration was adjusted to fit the profile to WT	2023/01/18
BIN1	O00499	513-593	SH3	R581C	his6-MBP-TEVsite-SH3	PTK2B	Q14289	708-722	PxxP_1	\N	TAFQEPPPKPSRPKY	Bio Ado Ado-TAFQEPPPKPSRPKY-CONH2	0.0551971	\N	10	1	3.77578	HU (DAPF)	Bait concentration was adjusted to fit the profile to WT	2023/01/18
BIN1	O00499	513-593	SH3	R581C	his6-MBP-TEVsite-SH3	PTK2B	Q14289	834-848	PxxP_2	\N	YMNDKSPLTPEKEVG	Bio Ado Ado-YMNDKSPLTPEKEVG-CONH2	0.0229576	\N	10	1	0	HU (DAPF)	Bait concentration was adjusted to fit the profile to WT	2023/01/18
BIN1	O00499	513-593	SH3	R581C	his6-MBP-TEVsite-SH3	PTK2B	Q14289	850-864	PxxP_3	\N	LEFTGPPQKPPRLGA	Bio Ado Ado-LEFTGPPQKPPRLGA-CONH2	0.138946	\N	10	1	4.23137	HU (DAPF)	Bait concentration was adjusted to fit the profile to WT	2023/01/18
BIN1	O00499	513-593	SH3	R581C	his6-MBP-TEVsite-SH3	RACGAP1	Q9H0H5	188-202	PxxP_1	\N	RQFVDGPPGPVKKTR	Bio Ado Ado-RQFVDGPPGPVKKTR-CONH2	0.017902	\N	10	1	0	HU (DAPF)	Bait concentration was adjusted to fit the profile to WT	2023/01/18
BIN1	O00499	513-593	SH3	R581C	his6-MBP-TEVsite-SH3	RASAL3	Q86YV0	91-105	PxxP_1	\N	GRHKNPPPEPDPEPE	Bio Ado Ado-GRHKNPPPEPDPEPE-CONH2	-0.0117997	\N	10	1	0	HU (DAPF)	Bait concentration was adjusted to fit the profile to WT	2023/01/18
BIN1	O00499	513-593	SH3	R581C	his6-MBP-TEVsite-SH3	RAVER1	Q8IY67	420-434	PxxP_1	\N	AGGGLPPELPPRRGK	Bio Ado Ado-AGGGLPPELPPRRGK-CONH2	0.369488	\N	10	1	4.83361	HU (DAPF)	Bait concentration was adjusted to fit the profile to WT	2023/01/18
BIN1	O00499	513-593	SH3	R581C	his6-MBP-TEVsite-SH3	RAVER1	Q8IY67	431-445	PxxP_2	\N	RRGKPPPLLPSVLGP	Bio Ado Ado-RRGKPPPLLPSVLGP-CONH2	0.0376311	\N	10	1	0	HU (DAPF)	Bait concentration was adjusted to fit the profile to WT	2023/01/18
BIN1	O00499	513-593	SH3	R581C	his6-MBP-TEVsite-SH3	RBBP6	Q7Z6E9	331-345	PxxP_1	\N	RLRKQLPPPPPPIPP	Bio Ado Ado-RLRKQLPPPPPPIPP-CONH2	0.0181852	\N	10	1	0	HU (DAPF)	Bait concentration was adjusted to fit the profile to WT	2023/01/18
BIN1	O00499	513-593	SH3	R581C	his6-MBP-TEVsite-SH3	RBBP6	Q7Z6E9	336-350	PxxP_2	\N	LPPPPPPIPPPRPLI	Bio Ado Ado-LPPPPPPIPPPRPLI-CONH2	0.029424	\N	10	1	0	HU (DAPF)	Bait concentration was adjusted to fit the profile to WT	2023/01/18
BIN1	O00499	513-593	SH3	R581C	his6-MBP-TEVsite-SH3	RBBP6	Q7Z6E9	725-739	PxxP_3	\N	RSYSRSPPYPRRGRG	Bio Ado Ado-RSYSRSPPYPRRGRG-CONH2	0.262636	\N	10	1	4.59733	HU (DAPF)	Bait concentration was adjusted to fit the profile to WT	2023/01/18
BIN1	O00499	513-593	SH3	R581C	his6-MBP-TEVsite-SH3	RBM15	Q96T37	311-325	PxxP_1	\N	ALGRLPPPPPPPLPR	Bio Ado Ado-ALGRLPPPPPPPLPR-CONH2	0.0672373	\N	10	1	3.86908	HU (DAPF)	Bait concentration was adjusted to fit the profile to WT	2023/01/18
BIN1	O00499	513-593	SH3	R581C	his6-MBP-TEVsite-SH3	RBM15	Q96T37	583-597	PxxP_2	\N	DSDWVPPPPPVRERS	Bio Ado Ado-DSDWVPPPPPVRERS-CONH2	-0.00854728	\N	10	1	0	HU (DAPF)	Bait concentration was adjusted to fit the profile to WT	2023/01/18
BIN1	O00499	513-593	SH3	R581C	his6-MBP-TEVsite-SH3	RBM15B	Q8NDT2	108-122	PxxP_1	\N	MSPRASPLPPPPPPP	Bio Ado Ado-MSPRASPLPPPPPPP-CONH2	-0.0014961	\N	10	1	0	HU (DAPF)	Bait concentration was adjusted to fit the profile to WT	2023/01/18
BIN1	O00499	513-593	SH3	R581C	his6-MBP-TEVsite-SH3	RBM33	Q96EV2	477-491	PxxP_1	\N	LEQRSPPPPPPPPTL	Bio Ado Ado-LEQRSPPPPPPPPTL-CONH2	-0.0154828	\N	10	1	0	HU (DAPF)	Bait concentration was adjusted to fit the profile to WT	2023/01/18
BIN1	O00499	513-593	SH3	R581C	his6-MBP-TEVsite-SH3	RBM33	Q96EV2	521-535	PxxP_2	\N	VFPRERPVRPALQPP	Bio Ado Ado-VFPRERPVRPALQPP-CONH2	0.0191943	\N	10	1	0	HU (DAPF)	Bait concentration was adjusted to fit the profile to WT	2023/01/18
BIN1	O00499	513-593	SH3	R581C	his6-MBP-TEVsite-SH3	RBM33	Q96EV2	547-561	PxxP_3	\N	GSATTRPFIPPRQPF	Bio Ado Ado-GSATTRPFIPPRQPF-CONH2	0.0879552	\N	10	1	3.99901	HU (DAPF)	Bait concentration was adjusted to fit the profile to WT	2023/01/18
BIN1	O00499	513-593	SH3	R581C	his6-MBP-TEVsite-SH3	RBM33	Q96EV2	706-720	PxxP_4	\N	SNLRELPIAPSHVIE	Bio Ado Ado-SNLRELPIAPSHVIE-CONH2	-0.0070926	\N	10	1	0	HU (DAPF)	Bait concentration was adjusted to fit the profile to WT	2023/01/18
BIN1	O00499	513-593	SH3	R581C	his6-MBP-TEVsite-SH3	RBM33	Q96EV2	757-771	PxxP_5	\N	TEVKVKPASPVAQPK	Bio Ado Ado-TEVKVKPASPVAQPK-CONH2	0.0060816	\N	10	1	0	HU (DAPF)	Bait concentration was adjusted to fit the profile to WT	2023/01/18
BIN1	O00499	513-593	SH3	R581C	his6-MBP-TEVsite-SH3	RBM33	Q96EV2	926-940	PxxP_6	\N	PLHKVLPIKPADVEE	Bio Ado Ado-PLHKVLPIKPADVEE-CONH2	0.00101261	\N	10	1	0	HU (DAPF)	Bait concentration was adjusted to fit the profile to WT	2023/01/18
BIN1	O00499	513-593	SH3	R581C	his6-MBP-TEVsite-SH3	RBMX	P38159	161-175	PxxP_1	\N	PPKRSAPSGPVRSSS	Bio Ado Ado-PPKRSAPSGPVRSSS-CONH2	-0.0262451	0.0116697	10	2	0	HU (DAPF)	Bait concentration was adjusted to fit the profile to WT	2023/01/18
BIN1	O00499	513-593	SH3	R581C	his6-MBP-TEVsite-SH3	RBMX	P38159	90-104	PxxP_2	\N	ESGRRGPPPPPRSRG	Bio Ado Ado-ESGRRGPPPPPRSRG-CONH2	0.261006	0.023447	10	2	4.59337	HU (DAPF)	Bait concentration was adjusted to fit the profile to WT	2023/01/18
BIN1	O00499	513-593	SH3	R581C	his6-MBP-TEVsite-SH3	RBMX	P38159	91-105	PxxP_3	\N	SGRRGPPPPPRSRGP	Bio Ado Ado-SGRRGPPPPPRSRGP-CONH2	0.233298	\N	10	1	4.5236	HU (DAPF)	Bait concentration was adjusted to fit the profile to WT	2023/01/18
BIN1	O00499	513-593	SH3	R581C	his6-MBP-TEVsite-SH3	REEP4	Q9H6H4	202-216	PxxP_1	\N	SDTEAVPRAPARPRE	Bio Ado Ado-SDTEAVPRAPARPRE-CONH2	0.0345625	\N	10	1	0	HU (DAPF)	Bait concentration was adjusted to fit the profile to WT	2023/01/18
BIN1	O00499	513-593	SH3	R581C	his6-MBP-TEVsite-SH3	RNF25	Q96BH1	333-347	PxxP_1	\N	QKAMLDPPKPSRGPW	Bio Ado Ado-QKAMLDPPKPSRGPW-CONH2	0.0348334	\N	10	1	0	HU (DAPF)	Bait concentration was adjusted to fit the profile to WT	2023/01/18
BIN1	O00499	513-593	SH3	R581C	his6-MBP-TEVsite-SH3	RNF25	Q96BH1	369-383	PxxP_2	\N	TQELPPPEGPLKEPM	Bio Ado Ado-TQELPPPEGPLKEPM-CONH2	0.0141901	\N	10	1	0	HU (DAPF)	Bait concentration was adjusted to fit the profile to WT	2023/01/18
BIN1	O00499	513-593	SH3	R581C	his6-MBP-TEVsite-SH3	RNPS1	Q15287	237-251	PxxP_1	\N	AVLAPWPRPPPRRFS	Bio Ado Ado-AVLAPWPRPPPRRFS-CONH2	0.541903	\N	10	1	5.1731	HU (DAPF)	Bait concentration was adjusted to fit the profile to WT	2023/01/18
BIN1	O00499	513-593	SH3	R581C	his6-MBP-TEVsite-SH3	RNPS1	Q15287	252-266	PxxP_2	\N	PPRRMLPPPPMWRRS	Bio Ado Ado-PPRRMLPPPPMWRRS-CONH2	0.191072	\N	10	1	4.40602	HU (DAPF)	Bait concentration was adjusted to fit the profile to WT	2023/01/18
BIN1	O00499	513-593	SH3	R581C	his6-MBP-TEVsite-SH3	RPS6KA5	O75582	270-284	PxxP_1	\N	RILKSEPPYPQEMSA	Bio Ado Ado-RILKSEPPYPQEMSA-CONH2	-0.0199925	\N	10	1	0	HU (DAPF)	Bait concentration was adjusted to fit the profile to WT	2023/01/18
BIN1	O00499	513-593	SH3	R581C	his6-MBP-TEVsite-SH3	RSPRY1	Q96DX4	71-85	PxxP_1	\N	ADTRSQPRDPVRPPR	Bio Ado Ado-ADTRSQPRDPVRPPR-CONH2	0.112865	0.00031545	10	2	4.12361	HU (DAPF)	Bait concentration was adjusted to fit the profile to WT	2023/01/18
BIN1	O00499	513-593	SH3	R581C	his6-MBP-TEVsite-SH3	RSPRY1	Q96DX4	74-88	PxxP_2	\N	RSQPRDPVRPPRRGR	Bio Ado Ado-RSQPRDPVRPPRRGR-CONH2	0.623326	\N	10	1	5.33615	HU (DAPF)	Bait concentration was adjusted to fit the profile to WT	2023/01/18
BIN1	O00499	513-593	SH3	R581C	his6-MBP-TEVsite-SH3	RSPRY1	Q96DX4	84-98	PxxP_3	\N	PRRGRGPHEPRRKKQ	Bio Ado Ado-PRRGRGPHEPRRKKQ-CONH2	0.0700757	\N	10	1	3.88884	HU (DAPF)	Bait concentration was adjusted to fit the profile to WT	2023/01/18
BIN1	O00499	513-593	SH3	R581C	his6-MBP-TEVsite-SH3	RUNX1	Q01196	167-181	PxxP_4	\N	KITVDGPREPRRHRQ	Bio Ado Ado-KITVDGPREPRRHRQ-CONH2	0.00168462	\N	10	1	0	HU (DAPF)	Bait concentration was adjusted to fit the profile to WT	2023/01/18
BIN1	O00499	513-593	SH3	R581C	his6-MBP-TEVsite-SH3	RUNX1	Q01196	207-221	PxxP_5	\N	TAMRVSPHHPAPTPN	Bio Ado Ado-TAMRVSPHHPAPTPN-CONH2	-0.0191699	\N	10	1	0	HU (DAPF)	Bait concentration was adjusted to fit the profile to WT	2023/01/18
BIN1	O00499	513-593	SH3	R581C	his6-MBP-TEVsite-SH3	RUNX1	Q01196	268-282	PxxP_6	\N	SVHPATPISPGRASG	Bio Ado Ado-SVHPATPISPGRASG-CONH2	0.00816187	\N	10	1	0	HU (DAPF)	Bait concentration was adjusted to fit the profile to WT	2023/01/18
BIN1	O00499	513-593	SH3	R581C	his6-MBP-TEVsite-SH3	RUNX1	Q01196	304-318	PxxP_7	\N	SDPRQFPALPSISDP	Bio Ado Ado-SDPRQFPALPSISDP-CONH2	0.0342599	\N	10	1	0	HU (DAPF)	Bait concentration was adjusted to fit the profile to WT	2023/01/18
BIN1	O00499	513-593	SH3	R581C	his6-MBP-TEVsite-SH3	RXRB	P28702	3-17	PxxP_1	\N	WAARPPFLPQRHAAG	Bio Ado Ado-WAARPPFLPQRHAAG-CONH2	-0.00226439	\N	10	1	0	HU (DAPF)	Bait concentration was adjusted to fit the profile to WT	2023/01/18
BIN1	O00499	513-593	SH3	R581C	his6-MBP-TEVsite-SH3	SAMD1	Q6SPF0	102-116	PxxP_1	\N	PRRGATPPAPPRAPR	Bio Ado Ado-PRRGATPPAPPRAPR-CONH2	0.287974	\N	10	1	4.65719	HU (DAPF)	Bait concentration was adjusted to fit the profile to WT	2023/01/18
BIN1	O00499	513-593	SH3	R581C	his6-MBP-TEVsite-SH3	SAMD1	Q6SPF0	187-201	PxxP_2	\N	PPAVAPPAGPRRAPP	Bio Ado Ado-PPAVAPPAGPRRAPP-CONH2	-0.023598	\N	10	1	0	HU (DAPF)	Bait concentration was adjusted to fit the profile to WT	2023/01/18
BIN1	O00499	513-593	SH3	R581C	his6-MBP-TEVsite-SH3	SAMD1	Q6SPF0	204-218	PxxP_3	\N	VAAREPPLPPPPQPP	Bio Ado Ado-VAAREPPLPPPPQPP-CONH2	-0.0254242	\N	10	1	0	HU (DAPF)	Bait concentration was adjusted to fit the profile to WT	2023/01/18
BIN1	O00499	513-593	SH3	R581C	his6-MBP-TEVsite-SH3	SAMD1	Q6SPF0	424-438	PxxP_4	\N	DSPSPVPLPPGKPAL	Bio Ado Ado-DSPSPVPLPPGKPAL-CONH2	0.0166748	\N	10	1	0	HU (DAPF)	Bait concentration was adjusted to fit the profile to WT	2023/01/18
BIN1	O00499	513-593	SH3	R581C	his6-MBP-TEVsite-SH3	SAMD1	Q6SPF0	450-464	PxxP_5	\N	PGRKEKPSDPVEWTV	Bio Ado Ado-PGRKEKPSDPVEWTV-CONH2	-0.00135544	\N	10	1	0	HU (DAPF)	Bait concentration was adjusted to fit the profile to WT	2023/01/18
BIN1	O00499	513-593	SH3	R581C	his6-MBP-TEVsite-SH3	SBF1	O95248	1029-1043	PxxP_1	\N	LGSAHTPGRPPRVTK	Bio Ado Ado-LGSAHTPGRPPRVTK-CONH2	0.0716896	\N	10	1	3.89976	HU (DAPF)	Bait concentration was adjusted to fit the profile to WT	2023/01/18
BIN1	O00499	513-593	SH3	R581C	his6-MBP-TEVsite-SH3	SCML2	Q9UQR0	158-172	PxxP_1	\N	TLFKKEPPKPPLNNF	Bio Ado Ado-TLFKKEPPKPPLNNF-CONH2	0.00398994	\N	10	1	0	HU (DAPF)	Bait concentration was adjusted to fit the profile to WT	2023/01/18
BIN1	O00499	513-593	SH3	R581C	his6-MBP-TEVsite-SH3	SCML2	Q9UQR0	159-173	PxxP_2	\N	LFKKEPPKPPLNNFK	Bio Ado Ado-LFKKEPPKPPLNNFK-CONH2	-0.00155936	\N	10	1	0	HU (DAPF)	Bait concentration was adjusted to fit the profile to WT	2023/01/18
BIN1	O00499	513-593	SH3	R581C	his6-MBP-TEVsite-SH3	SCML2	Q9UQR0	282-296	PxxP_3	\N	RSSRIKPPGPTAVPK	Bio Ado Ado-RSSRIKPPGPTAVPK-CONH2	0.00285415	\N	10	1	0	HU (DAPF)	Bait concentration was adjusted to fit the profile to WT	2023/01/18
BIN1	O00499	513-593	SH3	R581C	his6-MBP-TEVsite-SH3	SH3KBP1	Q96B97	390-404	PxxP_2	\N	LQKPSVPAIPPKKPR	Bio E E Ado Ado-LQKPSVPAIPPKKPR-CONH2	0.0070106	\N	10	1	0	HU (DAPF)	Bait concentration was adjusted to fit the profile to WT	2023/01/18
BIN1	O00499	513-593	SH3	R581C	his6-MBP-TEVsite-SH3	SHKBP1	Q8TBC3	642-656	PxxP_1	\N	SGHRGSPSPPQAEAR	Bio Ado Ado-SGHRGSPSPPQAEAR-CONH2	0.0304428	\N	10	1	0	HU (DAPF)	Bait concentration was adjusted to fit the profile to WT	2023/01/18
BIN1	O00499	513-593	SH3	R581C	his6-MBP-TEVsite-SH3	SHKBP1	Q8TBC3	688-702	PxxP_2	\N	SSGLGTPLTPPKMKL	Bio Ado Ado-SSGLGTPLTPPKMKL-CONH2	-0.00774827	\N	10	1	0	HU (DAPF)	Bait concentration was adjusted to fit the profile to WT	2023/01/18
BIN1	O00499	513-593	SH3	R581C	his6-MBP-TEVsite-SH3	SMC5	Q8IY18	15-29	PxxP_1	\N	PSKRALPRDPSSEVP	Bio Ado Ado-PSKRALPRDPSSEVP-CONH2	-0.0680011	\N	10	1	0	HU (DAPF)	Bait concentration was adjusted to fit the profile to WT	2023/01/18
BIN1	O00499	513-593	SH3	R581C	his6-MBP-TEVsite-SH3	SMCHD1	A6NHR9	1977-1991	PxxP_2	\N	VETTDCPVPPKRMRR	Bio E E Ado Ado-VETTDCPVPPKRMRR-CONH2	0.314063	\N	10	1	4.71593	HU (DAPF)	Bait concentration was adjusted to fit the profile to WT	2023/01/18
BIN1	O00499	513-593	SH3	R581C	his6-MBP-TEVsite-SH3	SPAST	Q9UBP0	36-50	PxxP_1	\N	AGPAPPPESPHKRNL	Bio Ado Ado-AGPAPPPESPHKRNL-CONH2	-0.0162856	\N	10	1	0	HU (DAPF)	Bait concentration was adjusted to fit the profile to WT	2023/01/18
BIN1	O00499	513-593	SH3	R581C	his6-MBP-TEVsite-SH3	SRRM1	Q8IYB3	576-590	PxxP_7	\N	PPRRRTPSPPPRRRS	Bio E E Ado Ado-PPRRRTPSPPPRRRS-CONH2	0.366132	\N	10	1	4.8267	HU (DAPF)	Bait concentration was adjusted to fit the profile to WT	2023/01/18
BIN1	O00499	513-593	SH3	R581C	his6-MBP-TEVsite-SH3	SYNJ1	O43426	1056-1070	PxxP_1	\N	ISEGPVPSLPIRPSR	Bio Ado Ado-ISEGPVPSLPIRPSR-CONH2	0.161382	\N	10	1	4.31177	HU (DAPF)	Bait concentration was adjusted to fit the profile to WT	2023/01/18
BIN1	O00499	513-593	SH3	R581C	his6-MBP-TEVsite-SH3	SYNJ1	O43426	1059-1073	PxxP_2	\N	GPVPSLPIRPSRAPS	Bio Ado Ado-GPVPSLPIRPSRAPS-CONH2	0.0697192	\N	10	1	3.8864	HU (DAPF)	Bait concentration was adjusted to fit the profile to WT	2023/01/18
BIN1	O00499	513-593	SH3	R581C	his6-MBP-TEVsite-SH3	SYNJ1	O43426	1096-1110	PxxP_3	\N	QKDPAQPLEPKRPPP	Bio Ado Ado-QKDPAQPLEPKRPPP-CONH2	-0.0424796	\N	10	1	0	HU (DAPF)	Bait concentration was adjusted to fit the profile to WT	2023/01/18
BIN1	O00499	513-593	SH3	R581C	his6-MBP-TEVsite-SH3	SYNJ1	O43426	1104-1118	PxxP_4	\N	EPKRPPPPRPVAPPT	Bio Ado Ado-EPKRPPPPRPVAPPT-CONH2	0.0098645	\N	10	1	0	HU (DAPF)	Bait concentration was adjusted to fit the profile to WT	2023/01/18
BIN1	O00499	513-593	SH3	R581C	his6-MBP-TEVsite-SH3	SYNJ1	O43426	1114-1128	PxxP_5	\N	VAPPTRPAPPQRPPP	Bio Ado Ado-VAPPTRPAPPQRPPP-CONH2	-0.0594707	\N	10	1	0	HU (DAPF)	Bait concentration was adjusted to fit the profile to WT	2023/01/18
BIN1	O00499	513-593	SH3	R581C	his6-MBP-TEVsite-SH3	SYNJ1	O43426	1190-1204	PxxP_6	\N	GYSTARPTIPPRAGV	Bio Ado Ado-GYSTARPTIPPRAGV-CONH2	0.179382	\N	10	1	4.3703	HU (DAPF)	Bait concentration was adjusted to fit the profile to WT	2023/01/18
BIN1	O00499	513-593	SH3	R581C	his6-MBP-TEVsite-SH3	SYNJ1	O43426	1278-1292	PxxP_7	\N	PNLETPPQPPPRSRS	Bio Ado Ado-PNLETPPQPPPRSRS-CONH2	0.535958	\N	10	1	5.16148	HU (DAPF)	Bait concentration was adjusted to fit the profile to WT	2023/01/18
BIN1	O00499	513-593	SH3	R581C	his6-MBP-TEVsite-SH3	SYNJ1	O43426	1371-1385	PxxP_8	\N	SCMPTMPPIPARSQS	Bio Ado Ado-SCMPTMPPIPARSQS-CONH2	0.0585037	\N	10	1	3.80313	HU (DAPF)	Bait concentration was adjusted to fit the profile to WT	2023/01/18
BIN1	O00499	513-593	SH3	R581C	his6-MBP-TEVsite-SH3	SYNJ1	O43426	1407-1421	PxxP_9	\N	SDRTAAPGNPFRAKS	Bio Ado Ado-SDRTAAPGNPFRAKS-CONH2	0.0077881	\N	10	1	0	HU (DAPF)	Bait concentration was adjusted to fit the profile to WT	2023/01/18
BIN1	O00499	513-593	SH3	R581C	his6-MBP-TEVsite-SH3	SYNJ1	O43426	1533-1547	PxxP_10	\N	LPSRRPPPPPVPLLP	Bio Ado Ado-LPSRRPPPPPVPLLP-CONH2	-0.0759964	\N	10	1	0	HU (DAPF)	Bait concentration was adjusted to fit the profile to WT	2023/01/18
BIN1	O00499	513-593	SH3	R581C	his6-MBP-TEVsite-SH3	SYNJ2	O15056	1098-1112	PxxP_1	\N	VPNRPRPPQPPQRPP	Bio Ado Ado-VPNRPRPPQPPQRPP-CONH2	-0.00169682	\N	10	1	0	HU (DAPF)	Bait concentration was adjusted to fit the profile to WT	2023/01/18
BIN1	O00499	513-593	SH3	R581C	his6-MBP-TEVsite-SH3	SYNJ2	O15056	1099-1113	PxxP_2	\N	PNRPRPPQPPQRPPP	Bio Ado Ado-PNRPRPPQPPQRPPP-CONH2	0.00217695	\N	10	1	0	HU (DAPF)	Bait concentration was adjusted to fit the profile to WT	2023/01/18
BIN1	O00499	513-593	SH3	R581C	his6-MBP-TEVsite-SH3	SYNJ2	O15056	1140-1154	PxxP_3	\N	QTARLLPGAPQQPPK	Bio Ado Ado-QTARLLPGAPQQPPK-CONH2	-0.0490672	\N	10	1	0	HU (DAPF)	Bait concentration was adjusted to fit the profile to WT	2023/01/18
BIN1	O00499	513-593	SH3	R581C	his6-MBP-TEVsite-SH3	SYNJ2	O15056	1143-1157	PxxP_4	\N	RLLPGAPQQPPKART	Bio Ado Ado-RLLPGAPQQPPKART-CONH2	0.0239089	\N	10	1	0	HU (DAPF)	Bait concentration was adjusted to fit the profile to WT	2023/01/18
BIN1	O00499	513-593	SH3	R581C	his6-MBP-TEVsite-SH3	SYNJ2	O15056	1219-1233	PxxP_5	\N	ETPQAPPLLPRRPPP	Bio Ado Ado-ETPQAPPLLPRRPPP-CONH2	-0.00870719	\N	10	1	0	HU (DAPF)	Bait concentration was adjusted to fit the profile to WT	2023/01/18
BIN1	O00499	513-593	SH3	R581C	his6-MBP-TEVsite-SH3	SYNJ2	O15056	1227-1241	PxxP_6	\N	LPRRPPPRVPAIKKP	Bio Ado Ado-LPRRPPPRVPAIKKP-CONH2	0.178019	\N	10	1	4.36602	HU (DAPF)	Bait concentration was adjusted to fit the profile to WT	2023/01/18
BIN1	O00499	513-593	SH3	R581C	his6-MBP-TEVsite-SH3	SYNJ2	O15056	1324-1338	PxxP_7	\N	EAPPLVPKVPPRRKK	Bio Ado Ado-EAPPLVPKVPPRRKK-CONH2	0.747905	\N	10	1	5.61749	HU (DAPF)	Bait concentration was adjusted to fit the profile to WT	2023/01/18
BIN1	O00499	513-593	SH3	R581C	his6-MBP-TEVsite-SH3	SYNJ2	O15056	1442-1456	PxxP_8	\N	RSPKRDPIDPVSAGA	Bio Ado Ado-RSPKRDPIDPVSAGA-CONH2	0.0047079	\N	10	1	0	HU (DAPF)	Bait concentration was adjusted to fit the profile to WT	2023/01/18
BIN1	O00499	513-593	SH3	R581C	his6-MBP-TEVsite-SH3	TBC1D10B	Q4KMP7	15-29	PxxP_1	\N	HGAPAAPSPPPRGSR	Bio Ado Ado-HGAPAAPSPPPRGSR-CONH2	0.495403	\N	10	1	5.08259	HU (DAPF)	Bait concentration was adjusted to fit the profile to WT	2023/01/18
BIN1	O00499	513-593	SH3	R581C	his6-MBP-TEVsite-SH3	TBC1D10B	Q4KMP7	673-687	PxxP_2	\N	AGGAPSPPPPVRRAS	Bio Ado Ado-AGGAPSPPPPVRRAS-CONH2	0.0430065	\N	10	1	0	HU (DAPF)	Bait concentration was adjusted to fit the profile to WT	2023/01/18
BIN1	O00499	513-593	SH3	R581C	his6-MBP-TEVsite-SH3	TBC1D9B	Q66K14	261-275	PxxP_1	\N	DKALPRPIRPHRNIS	Bio Ado Ado-DKALPRPIRPHRNIS-CONH2	0.184256	\N	10	1	4.38539	HU (DAPF)	Bait concentration was adjusted to fit the profile to WT	2023/01/18
BIN1	O00499	513-593	SH3	R581C	his6-MBP-TEVsite-SH3	TBC1D9B	Q66K14	556-570	PxxP_2	\N	DLHRSMPEHPAFQNE	Bio Ado Ado-DLHRSMPEHPAFQNE-CONH2	-0.0107809	\N	10	1	0	HU (DAPF)	Bait concentration was adjusted to fit the profile to WT	2023/01/18
BIN1	O00499	513-593	SH3	R581C	his6-MBP-TEVsite-SH3	TIPIN	Q9BVW5	23-37	PxxP_1	\N	FPPFPPPASPERQDG	Bio Ado Ado-FPPFPPPASPERQDG-CONH2	0.0110809	\N	10	1	0	HU (DAPF)	Bait concentration was adjusted to fit the profile to WT	2023/01/18
BIN1	O00499	513-593	SH3	R581C	his6-MBP-TEVsite-SH3	TMEM237	Q96Q45	15-29	PxxP_1	\N	RPPRALPPVPSQDDI	Bio Ado Ado-RPPRALPPVPSQDDI-CONH2	-0.0636556	\N	10	1	0	HU (DAPF)	Bait concentration was adjusted to fit the profile to WT	2023/01/18
BIN1	O00499	513-593	SH3	R581C	his6-MBP-TEVsite-SH3	TMEM237	Q96Q45	70-84	PxxP_2	\N	KELKEHPEAPVQRRQ	Bio Ado Ado-KELKEHPEAPVQRRQ-CONH2	0.0147535	\N	10	1	0	HU (DAPF)	Bait concentration was adjusted to fit the profile to WT	2023/01/18
BIN1	O00499	513-593	SH3	R581C	his6-MBP-TEVsite-SH3	TPX2	Q9ULW0	108-122	PxxP_1	\N	AISRKTPAQPQRRSL	Bio Ado Ado-AISRKTPAQPQRRSL-CONH2	0.0174733	0.011655	10	2	0	HU (DAPF)	Bait concentration was adjusted to fit the profile to WT	2023/01/18
BIN1	O00499	513-593	SH3	R581C	his6-MBP-TEVsite-SH3	TPX2	Q9ULW0	285-299	PxxP_2	\N	SELRKHPSSPARVTK	Bio Ado Ado-SELRKHPSSPARVTK-CONH2	-0.0344067	0.0281709	10	2	0	HU (DAPF)	Bait concentration was adjusted to fit the profile to WT	2023/01/18
BIN1	O00499	513-593	SH3	R581C	his6-MBP-TEVsite-SH3	TPX2	Q9ULW0	410-424	PxxP_3	\N	RILEGGPILPKKPPV	Bio Ado Ado-RILEGGPILPKKPPV-CONH2	0.00798747	\N	10	1	0	HU (DAPF)	Bait concentration was adjusted to fit the profile to WT	2023/01/18
BIN1	O00499	513-593	SH3	R581C	his6-MBP-TEVsite-SH3	TPX2	Q9ULW0	417-431	PxxP_4	\N	ILPKKPPVKPPTEPI	Bio Ado Ado-ILPKKPPVKPPTEPI-CONH2	-0.0391379	\N	10	1	0	HU (DAPF)	Bait concentration was adjusted to fit the profile to WT	2023/01/18
BIN1	O00499	513-593	SH3	R581C	his6-MBP-TEVsite-SH3	TPX2	Q9ULW0	631-645	PxxP_5	\N	TVISQEPFVPKKEKK	Bio Ado Ado-TVISQEPFVPKKEKK-CONH2	-0.0637579	\N	10	1	0	HU (DAPF)	Bait concentration was adjusted to fit the profile to WT	2023/01/18
BIN1	O00499	513-593	SH3	R581C	his6-MBP-TEVsite-SH3	UNC119	Q13432	53-67	PxxP_1	\N	PLQRKQPIGPEDVLG	Bio Ado Ado-PLQRKQPIGPEDVLG-CONH2	0.0156503	\N	10	1	0	HU (DAPF)	Bait concentration was adjusted to fit the profile to WT	2023/01/18
BIN1	O00499	513-593	SH3	R581C	his6-MBP-TEVsite-SH3	WAS	P42768	154-168	PxxP_1	\N	GDRRQLPPPPTPANE	Bio Ado Ado-GDRRQLPPPPTPANE-CONH2	-0.0345653	\N	10	1	0	HU (DAPF)	Bait concentration was adjusted to fit the profile to WT	2023/01/18
BIN1	O00499	513-593	SH3	R581C	his6-MBP-TEVsite-SH3	WAS	P42768	306-320	PxxP_2	\N	EMRRQEPLPPPPPPS	Bio Ado Ado-EMRRQEPLPPPPPPS-CONH2	-0.00225943	\N	10	1	0	HU (DAPF)	Bait concentration was adjusted to fit the profile to WT	2023/01/18
BIN1	O00499	513-593	SH3	R581C	his6-MBP-TEVsite-SH3	WAS	P42768	310-324	PxxP_3	\N	QEPLPPPPPPSRGGN	Bio Ado Ado-QEPLPPPPPPSRGGN-CONH2	0.0215721	\N	10	1	0	HU (DAPF)	Bait concentration was adjusted to fit the profile to WT	2023/01/18
BIN1	O00499	513-593	SH3	R581C	his6-MBP-TEVsite-SH3	WAS	P42768	335-349	PxxP_4	\N	NKGRSGPLPPVPLGI	Bio Ado Ado-NKGRSGPLPPVPLGI-CONH2	-0.0782194	\N	10	1	0	HU (DAPF)	Bait concentration was adjusted to fit the profile to WT	2023/01/18
BIN1	O00499	513-593	SH3	R581C	his6-MBP-TEVsite-SH3	WAS	P42768	353-367	PxxP_5	\N	PPTPRGPPPPGRGGP	Bio Ado Ado-PPTPRGPPPPGRGGP-CONH2	-0.104192	\N	10	1	0	HU (DAPF)	Bait concentration was adjusted to fit the profile to WT	2023/01/18
BIN1	O00499	513-593	SH3	R581C	his6-MBP-TEVsite-SH3	WAS	P42768	361-375	PxxP_6	\N	PPGRGGPPPPPPPAT	Bio Ado Ado-PPGRGGPPPPPPPAT-CONH2	-0.0136256	\N	10	1	0	HU (DAPF)	Bait concentration was adjusted to fit the profile to WT	2023/01/18
BIN1	O00499	513-593	SH3	R581C	his6-MBP-TEVsite-SH3	WAS	P42768	374-388	PxxP_7	\N	ATGRSGPLPPPPPGA	Bio Ado Ado-ATGRSGPLPPPPPGA-CONH2	0.0204237	\N	10	1	0	HU (DAPF)	Bait concentration was adjusted to fit the profile to WT	2023/01/18
BIN1	O00499	513-593	SH3	R581C	his6-MBP-TEVsite-SH3	WDR33	Q9C0J8	1044-1058	PxxP_1	\N	KWRRGGPGPPFPPDH	Bio Ado Ado-KWRRGGPGPPFPPDH-CONH2	0.00283019	\N	10	1	0	HU (DAPF)	Bait concentration was adjusted to fit the profile to WT	2023/01/18
BIN1	O00499	513-593	SH3	R581C	his6-MBP-TEVsite-SH3	WDR33	Q9C0J8	939-953	PxxP_2	\N	AQGRIPPLNPGQGPG	Bio Ado Ado-AQGRIPPLNPGQGPG-CONH2	0.0118894	\N	10	1	0	HU (DAPF)	Bait concentration was adjusted to fit the profile to WT	2023/01/18
BIN1	O00499	513-593	SH3	R581C	his6-MBP-TEVsite-SH3	WDR44	Q5JSH3	205-219	PxxP_1	\N	AVEEVAPAKPPRHLT	Bio Ado Ado-AVEEVAPAKPPRHLT-CONH2	0.0622145	\N	10	1	3.83218	HU (DAPF)	Bait concentration was adjusted to fit the profile to WT	2023/01/18
BIN1	O00499	513-593	SH3	R581C	his6-MBP-TEVsite-SH3	WDR44	Q5JSH3	227-241	PxxP_2	\N	STKKPVPARPPPPTN	Bio Ado Ado-STKKPVPARPPPPTN-CONH2	0.00960817	\N	10	1	0	HU (DAPF)	Bait concentration was adjusted to fit the profile to WT	2023/01/18
BIN1	O00499	513-593	SH3	R581C	his6-MBP-TEVsite-SH3	WDR44	Q5JSH3	241-255	PxxP_3	\N	NFPPPRPPPPSRPAP	Bio Ado Ado-NFPPPRPPPPSRPAP-CONH2	-0.0139466	\N	10	1	0	HU (DAPF)	Bait concentration was adjusted to fit the profile to WT	2023/01/18
BIN1	O00499	513-593	SH3	R581C	his6-MBP-TEVsite-SH3	WDR44	Q5JSH3	247-261	PxxP_4	\N	PPPPSRPAPPPRKRK	Bio Ado Ado-PPPPSRPAPPPRKRK-CONH2	0.722773	\N	10	1	5.55562	HU (DAPF)	Bait concentration was adjusted to fit the profile to WT	2023/01/18
BIN1	O00499	513-593	SH3	R581C	his6-MBP-TEVsite-SH3	WEE1	P30291	3-17	PxxP_1	\N	FLSRQQPPPPRRAGA	Bio Ado Ado-FLSRQQPPPPRRAGA-CONH2	0.0106883	0.0283953	10	2	0	HU (DAPF)	Bait concentration was adjusted to fit the profile to WT	2023/01/18
BIN1	O00499	513-593	SH3	R581C	his6-MBP-TEVsite-SH3	WEE1	P30291	55-69	PxxP_2	\N	FQEPDSPLPPARSPT	Bio Ado Ado-FQEPDSPLPPARSPT-CONH2	0.0300107	\N	10	1	0	HU (DAPF)	Bait concentration was adjusted to fit the profile to WT	2023/01/18
BIN1	O00499	513-593	SH3	R581C	his6-MBP-TEVsite-SH3	WIPF1	O43516	138-152	PxxP_1	\N	AKPFSPPSGPGRFPV	Bio Ado Ado-AKPFSPPSGPGRFPV-CONH2	0.0250581	\N	10	1	0	HU (DAPF)	Bait concentration was adjusted to fit the profile to WT	2023/01/18
BIN1	O00499	513-593	SH3	R581C	his6-MBP-TEVsite-SH3	WIPF1	O43516	155-169	PxxP_2	\N	PGHRSGPPEPQRNRM	Bio Ado Ado-PGHRSGPPEPQRNRM-CONH2	-0.0800867	0.0967249	10	2	0	HU (DAPF)	Bait concentration was adjusted to fit the profile to WT	2023/01/18
BIN1	O00499	513-593	SH3	R581C	his6-MBP-TEVsite-SH3	WIPF1	O43516	165-179	PxxP_3	\N	QRNRMPPPRPDVGSK	Bio Ado Ado-QRNRMPPPRPDVGSK-CONH2	-0.0105708	\N	10	1	0	HU (DAPF)	Bait concentration was adjusted to fit the profile to WT	2023/01/18
BIN1	O00499	513-593	SH3	R581C	his6-MBP-TEVsite-SH3	WIPF1	O43516	198-212	PxxP_4	\N	PHNRGSPPVPGGPRQ	Bio Ado Ado-PHNRGSPPVPGGPRQ-CONH2	0.0259184	\N	10	1	0	HU (DAPF)	Bait concentration was adjusted to fit the profile to WT	2023/01/18
BIN1	O00499	513-593	SH3	R581C	his6-MBP-TEVsite-SH3	WIPF1	O43516	247-261	PxxP_5	\N	SNRPPLPPTPSRALD	Bio Ado Ado-SNRPPLPPTPSRALD-CONH2	-0.0518787	\N	10	1	0	HU (DAPF)	Bait concentration was adjusted to fit the profile to WT	2023/01/18
BIN1	O00499	513-593	SH3	R581C	his6-MBP-TEVsite-SH3	WIPF1	O43516	260-274	PxxP_6	\N	LDDKPPPPPPPVGNR	Bio Ado Ado-LDDKPPPPPPPVGNR-CONH2	0.0369777	\N	10	1	0	HU (DAPF)	Bait concentration was adjusted to fit the profile to WT	2023/01/18
BIN1	O00499	513-593	SH3	R581C	his6-MBP-TEVsite-SH3	WIPF1	O43516	304-318	PxxP_7	\N	SQAPPPPPPPSRPGP	Bio Ado Ado-SQAPPPPPPPSRPGP-CONH2	-0.00300521	\N	10	1	0	HU (DAPF)	Bait concentration was adjusted to fit the profile to WT	2023/01/18
BIN1	O00499	513-593	SH3	R581C	his6-MBP-TEVsite-SH3	WIPF1	O43516	326-340	PxxP_8	\N	SGNDETPRLPQRNLS	Bio Ado Ado-SGNDETPRLPQRNLS-CONH2	0.00788282	\N	10	1	0	HU (DAPF)	Bait concentration was adjusted to fit the profile to WT	2023/01/18
BIN1	O00499	513-593	SH3	R581C	his6-MBP-TEVsite-SH3	WIPF1	O43516	350-364	PxxP_9	\N	SPGRSGPLPPPPSER	Bio Ado Ado-SPGRSGPLPPPPSER-CONH2	0.0115251	\N	10	1	0	HU (DAPF)	Bait concentration was adjusted to fit the profile to WT	2023/01/18
BIN1	O00499	513-593	SH3	R581C	his6-MBP-TEVsite-SH3	WIPF1	O43516	359-373	PxxP_10	\N	PPPSERPPPPVRDPP	Bio Ado Ado-PPPSERPPPPVRDPP-CONH2	0.00925896	\N	10	1	0	HU (DAPF)	Bait concentration was adjusted to fit the profile to WT	2023/01/18
BIN1	O00499	513-593	SH3	R581C	his6-MBP-TEVsite-SH3	WIPF1	O43516	372-386	PxxP_11	\N	PPGRSGPLPPPPPVS	Bio Ado Ado-PPGRSGPLPPPPPVS-CONH2	-0.0360512	\N	10	1	0	HU (DAPF)	Bait concentration was adjusted to fit the profile to WT	2023/01/18
BIN1	O00499	513-593	SH3	R581C	his6-MBP-TEVsite-SH3	WIPF1	O43516	390-404	PxxP_12	\N	STSRALPATPQLPSR	Bio Ado Ado-STSRALPATPQLPSR-CONH2	0.0305067	\N	10	1	0	HU (DAPF)	Bait concentration was adjusted to fit the profile to WT	2023/01/18
BIN1	O00499	513-593	SH3	R581C	his6-MBP-TEVsite-SH3	WIPF1	O43516	393-407	PxxP_13	\N	RALPATPQLPSRSGV	Bio Ado Ado-RALPATPQLPSRSGV-CONH2	0.0615335	\N	10	1	3.82697	HU (DAPF)	Bait concentration was adjusted to fit the profile to WT	2023/01/18
BIN1	O00499	513-593	SH3	R581C	his6-MBP-TEVsite-SH3	WIPF1	O43516	408-422	PxxP_14	\N	DSPRSGPRPPLPPDR	Bio Ado Ado-DSPRSGPRPPLPPDR-CONH2	0.0586709	\N	10	1	3.80447	HU (DAPF)	Bait concentration was adjusted to fit the profile to WT	2023/01/18
BIN1	O00499	513-593	SH3	R581C	his6-MBP-TEVsite-SH3	WIPF1	O43516	411-425	PxxP_15	\N	RSGPRPPLPPDRPSA	Bio Ado Ado-RSGPRPPLPPDRPSA-CONH2	-0.00230854	\N	10	1	0	HU (DAPF)	Bait concentration was adjusted to fit the profile to WT	2023/01/18
BIN1	O00499	513-593	SH3	R581C	his6-MBP-TEVsite-SH3	WIPF1	O43516	490-503	PxxP_16	\N	RRERGAPPLPPIPR_	Bio Ado Ado-RRERGAPPLPPIPR_-CONH2	0.129337	\N	10	1	4.19376	HU (DAPF)	Bait concentration was adjusted to fit the profile to WT	2023/01/18
BIN1	O00499	513-593	SH3	R581C	his6-MBP-TEVsite-SH3	WIZ	O95785	1135-1149	PxxP_1	\N	PLAKKLPPPPGSPLG	Bio Ado Ado-PLAKKLPPPPGSPLG-CONH2	0.00453593	\N	10	1	0	HU (DAPF)	Bait concentration was adjusted to fit the profile to WT	2023/01/18
BIN1	O00499	513-593	SH3	R581C	his6-MBP-TEVsite-SH3	WIZ	O95785	1164-1178	PxxP_2	\N	FPGLAAPSLPKKLKP	Bio Ado Ado-FPGLAAPSLPKKLKP-CONH2	-0.00548639	\N	10	1	0	HU (DAPF)	Bait concentration was adjusted to fit the profile to WT	2023/01/18
BIN1	O00499	513-593	SH3	R581C	his6-MBP-TEVsite-SH3	WIZ	O95785	157-171	PxxP_3	\N	LPAQPPPLAPFRRVF	Bio Ado Ado-LPAQPPPLAPFRRVF-CONH2	0.192794	\N	10	1	4.41115	HU (DAPF)	Bait concentration was adjusted to fit the profile to WT	2023/01/18
BIN1	O00499	513-593	SH3	R581C	his6-MBP-TEVsite-SH3	WIZ	O95785	9-23	PxxP_4	\N	LAAPDRPQGPERLPG	Bio Ado Ado-LAAPDRPQGPERLPG-CONH2	-0.0214682	\N	10	1	0	HU (DAPF)	Bait concentration was adjusted to fit the profile to WT	2023/01/18
BIN1	O00499	513-593	SH3	R581C	his6-MBP-TEVsite-SH3	XRN2	Q9H0D6	933-947	PxxP_1	\N	REGRKYPLPPPSGRY	Bio Ado Ado-REGRKYPLPPPSGRY-CONH2	0.102304	\N	10	1	4.07398	HU (DAPF)	Bait concentration was adjusted to fit the profile to WT	2023/01/18
BIN1	O00499	513-593	SH3	R581C	his6-MBP-TEVsite-SH3	YAF2	Q8IY57	3-17	PxxP_1	\N	DKKSPTRPKRQPKPS	Bio Ado Ado-DKKSPTRPKRQPKPS-CONH2	0.29947	0.00100975	10	2	4.68339	HU (DAPF)	Bait concentration was adjusted to fit the profile to WT	2023/01/18
BIN1	O00499	513-593	SH3	R581C	his6-MBP-TEVsite-SH3	ZC3H13	Q5T200	1025-1039	PxxP_1	\N	SKKKRGPRTPPITTK	Bio Ado Ado-SKKKRGPRTPPITTK-CONH2	0.180882	\N	10	1	4.37498	HU (DAPF)	Bait concentration was adjusted to fit the profile to WT	2023/01/18
BIN1	O00499	513-593	SH3	R581C	his6-MBP-TEVsite-SH3	ZC3H13	Q5T200	255-269	PxxP_2	\N	QSKKKGPRTPSPPPP	Bio Ado Ado-QSKKKGPRTPSPPPP-CONH2	0.0187666	\N	10	1	0	HU (DAPF)	Bait concentration was adjusted to fit the profile to WT	2023/01/18
BIN1	O00499	513-593	SH3	R581C	his6-MBP-TEVsite-SH3	ZC3H13	Q5T200	562-576	PxxP_3	\N	RSRGRVPELPEKGSR	Bio Ado Ado-RSRGRVPELPEKGSR-CONH2	0.0312837	\N	10	1	0	HU (DAPF)	Bait concentration was adjusted to fit the profile to WT	2023/01/18
BIN1	O00499	513-593	SH3	R581C	his6-MBP-TEVsite-SH3	ZC3H13	Q5T200	635-649	PxxP_4	\N	RERDQRPSSPIRHQG	Bio Ado Ado-RERDQRPSSPIRHQG-CONH2	0.0187798	\N	10	1	0	HU (DAPF)	Bait concentration was adjusted to fit the profile to WT	2023/01/18
BIN1	O00499	513-593	SH3	R581C	his6-MBP-TEVsite-SH3	ZC3H13	Q5T200	72-86	PxxP_5	\N	SNYRRSPERPTGDLR	Bio Ado Ado-SNYRRSPERPTGDLR-CONH2	0.0241326	\N	10	1	0	HU (DAPF)	Bait concentration was adjusted to fit the profile to WT	2023/01/18
BIN1	O00499	513-593	SH3	R581C	his6-MBP-TEVsite-SH3	ZC3H14	Q6PJT7	329-343	PxxP_1	\N	SSSVSVPAKPERRPS	Bio Ado Ado-SSSVSVPAKPERRPS-CONH2	0.00490188	0.0220744	10	2	0	HU (DAPF)	Bait concentration was adjusted to fit the profile to WT	2023/01/18
BIN1	O00499	513-593	SH3	R581C	his6-MBP-TEVsite-SH3	ZC4H2	Q9NQZ6	209-223	PxxP_1	\N	KSRSRNPKKPKRKQD	Bio Ado Ado-KSRSRNPKKPKRKQD-CONH2	0.142741	\N	10	1	4.24566	HU (DAPF)	Bait concentration was adjusted to fit the profile to WT	2023/01/18
BIN1	O00499	513-593	SH3	R581C	his6-MBP-TEVsite-SH3	ZNF280C	Q8ND82	72-86	PxxP_1	\N	KGIKSEPHSPGIPEI	Bio Ado Ado-KGIKSEPHSPGIPEI-CONH2	0.0557749	\N	10	1	3.78067	HU (DAPF)	Bait concentration was adjusted to fit the profile to WT	2023/01/18
BIN1	O00499	513-593	SH3	R581C	his6-MBP-TEVsite-SH3	ZNF280C	Q8ND82	92-106	PxxP_2	\N	QRCRDPPSNPVAASP	Bio Ado Ado-QRCRDPPSNPVAASP-CONH2	0.0386388	\N	10	1	0	HU (DAPF)	Bait concentration was adjusted to fit the profile to WT	2023/01/18
BIN1	O00499	513-593	SH3	R581C	his6-MBP-TEVsite-SH3	ZNF787	Q6DD87	56-70	PxxP_1	\N	PPPRPRPPAPYICNE	Bio Ado Ado-PPPRPRPPAPYICNE-CONH2	0.0081902	\N	10	1	0	HU (DAPF)	Bait concentration was adjusted to fit the profile to WT	2023/01/18
BIN1	O00499	513-593	SH3	V583I	his6-MBP-TEVsite-SH3	ABL2	P42684	615-629	PxxP_1	\N	QASSGSPALPRKQRD	Bio Ado Ado-QASSGSPALPRKQRD-CONH2	-0.0255793	\N	13	1	0	HU (DAPF)	Bait concentration was adjusted to fit the profile to WT	2023/01/17
BIN1	O00499	513-593	SH3	V583I	his6-MBP-TEVsite-SH3	ABL2	P42684	657-671	PxxP_2	\N	MKKRNAPTPPKRSSS	Bio Ado Ado-MKKRNAPTPPKRSSS-CONH2	0.514906	0.0110528	13	2	4.98687	HU (DAPF)	Bait concentration was adjusted to fit the profile to WT	2023/01/17
BIN1	O00499	513-593	SH3	V583I	his6-MBP-TEVsite-SH3	ABL2	P42684	915-929	PxxP_3	\N	SPAKAAPVLPTTHNH	Bio Ado Ado-SPAKAAPVLPTTHNH-CONH2	-0.0159572	\N	13	1	0	HU (DAPF)	Bait concentration was adjusted to fit the profile to WT	2023/01/17
BIN1	O00499	513-593	SH3	V583I	his6-MBP-TEVsite-SH3	ABL2	P42684	978-992	PxxP_4	\N	VKPKCAPPPPPVMRL	Bio Ado Ado-VKPKCAPPPPPVMRL-CONH2	0.029269	\N	13	1	0	HU (DAPF)	Bait concentration was adjusted to fit the profile to WT	2023/01/17
BIN1	O00499	513-593	SH3	V583I	his6-MBP-TEVsite-SH3	AGAP2	Q99490	176-190	PxxP_1	\N	RRLKVAPPPPAPKPC	Bio Ado Ado-RRLKVAPPPPAPKPC-CONH2	0.238534	\N	13	1	4.41506	HU (DAPF)	Bait concentration was adjusted to fit the profile to WT	2023/01/17
BIN1	O00499	513-593	SH3	V583I	his6-MBP-TEVsite-SH3	AGAP2	Q99490	577-591	PxxP_2	\N	AACKSLPSSPSHSAA	Bio Ado Ado-AACKSLPSSPSHSAA-CONH2	-0.0712814	\N	13	1	0	HU (DAPF)	Bait concentration was adjusted to fit the profile to WT	2023/01/17
BIN1	O00499	513-593	SH3	V583I	his6-MBP-TEVsite-SH3	AGAP2	Q99490	819-833	PxxP_3	\N	PLSREPPPSPMVKKQ	Bio Ado Ado-PLSREPPPSPMVKKQ-CONH2	-0.0208898	\N	13	1	0	HU (DAPF)	Bait concentration was adjusted to fit the profile to WT	2023/01/17
BIN1	O00499	513-593	SH3	V583I	his6-MBP-TEVsite-SH3	AGAP2	Q99490	91-105	PxxP_4	\N	PALSPAPASPARPVS	Bio Ado Ado-PALSPAPASPARPVS-CONH2	0.00551763	\N	13	1	0	HU (DAPF)	Bait concentration was adjusted to fit the profile to WT	2023/01/17
BIN1	O00499	513-593	SH3	V583I	his6-MBP-TEVsite-SH3	ANKS1A	Q92625	314-328	PxxP_1	\N	EVDKTPPPQPPLISS	Bio Ado Ado-EVDKTPPPQPPLISS-CONH2	-0.0182003	\N	13	1	0	HU (DAPF)	Bait concentration was adjusted to fit the profile to WT	2023/01/17
BIN1	O00499	513-593	SH3	V583I	his6-MBP-TEVsite-SH3	ANKS1A	Q92625	401-415	PxxP_2	\N	VRPRERPPPPAKPPP	Bio Ado Ado-VRPRERPPPPAKPPP-CONH2	-0.0330422	0.011152	13	2	0	HU (DAPF)	Bait concentration was adjusted to fit the profile to WT	2023/01/17
BIN1	O00499	513-593	SH3	V583I	his6-MBP-TEVsite-SH3	ANKS1A	Q92625	832-846	PxxP_3	\N	RPYEEPPQKPPRFSQ	Bio Ado Ado-RPYEEPPQKPPRFSQ-CONH2	0.094364	\N	13	1	3.91671	HU (DAPF)	Bait concentration was adjusted to fit the profile to WT	2023/01/17
BIN1	O00499	513-593	SH3	V583I	his6-MBP-TEVsite-SH3	ANKS1A	Q92625	885-899	PxxP_4	\N	HDSLHDPAAPSRAER	Bio Ado Ado-HDSLHDPAAPSRAER-CONH2	-0.0416233	\N	13	1	0	HU (DAPF)	Bait concentration was adjusted to fit the profile to WT	2023/01/17
BIN1	O00499	513-593	SH3	V583I	his6-MBP-TEVsite-SH3	ANLN	Q9NQW6	315-329	PxxP_1	\N	ELLPKTPISPLKTGV	Bio Ado Ado-ELLPKTPISPLKTGV-CONH2	-0.0107901	\N	13	1	0	HU (DAPF)	Bait concentration was adjusted to fit the profile to WT	2023/01/17
BIN1	O00499	513-593	SH3	V583I	his6-MBP-TEVsite-SH3	APBB1IP	Q7Z5R6	512-526	PxxP_1	\N	PKSSLPPPPPVRRSS	Bio Ado Ado-PKSSLPPPPPVRRSS-CONH2	0.262099	\N	13	1	4.47304	HU (DAPF)	Bait concentration was adjusted to fit the profile to WT	2023/01/17
BIN1	O00499	513-593	SH3	V583I	his6-MBP-TEVsite-SH3	APBB1IP	Q7Z5R6	526-540	PxxP_2	\N	SDTSGSPATPLKAKG	Bio Ado Ado-SDTSGSPATPLKAKG-CONH2	0.000445186	\N	13	1	0	HU (DAPF)	Bait concentration was adjusted to fit the profile to WT	2023/01/17
BIN1	O00499	513-593	SH3	V583I	his6-MBP-TEVsite-SH3	APBB1IP	Q7Z5R6	621-635	PxxP_3	\N	PAVAKRPPVPPKRQE	Bio Ado Ado-PAVAKRPPVPPKRQE-CONH2	0.213664	\N	13	1	4.34971	HU (DAPF)	Bait concentration was adjusted to fit the profile to WT	2023/01/17
BIN1	O00499	513-593	SH3	V583I	his6-MBP-TEVsite-SH3	APBB1IP	Q7Z5R6	622-636	PxxP_4	\N	AVAKRPPVPPKRQEN	Bio Ado Ado-AVAKRPPVPPKRQEN-CONH2	0.187567	0.00820825	13	2	4.27524	HU (DAPF)	Bait concentration was adjusted to fit the profile to WT	2023/01/17
BIN1	O00499	513-593	SH3	V583I	his6-MBP-TEVsite-SH3	ARAP1	Q96P48	109-123	PxxP_1	\N	EGLPAAPPIPPRRSC	Bio Ado Ado-EGLPAAPPIPPRRSC-CONH2	0.724874	\N	13	1	5.41639	HU (DAPF)	Bait concentration was adjusted to fit the profile to WT	2023/01/17
BIN1	O00499	513-593	SH3	V583I	his6-MBP-TEVsite-SH3	ARAP1	Q96P48	110-124	PxxP_2	\N	GLPAAPPIPPRRSCL	Bio Ado Ado-GLPAAPPIPPRRSCL-CONH2	0.600522	\N	13	1	5.15182	HU (DAPF)	Bait concentration was adjusted to fit the profile to WT	2023/01/17
BIN1	O00499	513-593	SH3	V583I	his6-MBP-TEVsite-SH3	ARAP1	Q96P48	136-150	PxxP_3	\N	APDPVLPPLPAKRHL	Bio Ado Ado-APDPVLPPLPAKRHL-CONH2	0.022918	\N	13	1	0	HU (DAPF)	Bait concentration was adjusted to fit the profile to WT	2023/01/17
BIN1	O00499	513-593	SH3	V583I	his6-MBP-TEVsite-SH3	ARAP1	Q96P48	150-164	PxxP_4	\N	LAELSVPPVPPRTGP	Bio Ado Ado-LAELSVPPVPPRTGP-CONH2	0.0804551	\N	13	1	3.83892	HU (DAPF)	Bait concentration was adjusted to fit the profile to WT	2023/01/17
BIN1	O00499	513-593	SH3	V583I	his6-MBP-TEVsite-SH3	ARAP1	Q96P48	207-221	PxxP_5	\N	SPPPCPPEIPPKPVR	Bio Ado Ado-SPPPCPPEIPPKPVR-CONH2	0.0544598	\N	13	1	3.65379	HU (DAPF)	Bait concentration was adjusted to fit the profile to WT	2023/01/17
BIN1	O00499	513-593	SH3	V583I	his6-MBP-TEVsite-SH3	ARAP1	Q96P48	210-224	PxxP_6	\N	PCPPEIPPKPVRLFP	Bio Ado Ado-PCPPEIPPKPVRLFP-CONH2	-0.0210541	\N	13	1	0	HU (DAPF)	Bait concentration was adjusted to fit the profile to WT	2023/01/17
BIN1	O00499	513-593	SH3	V583I	his6-MBP-TEVsite-SH3	ARAP1	Q96P48	233-247	PxxP_7	\N	EVPEEGPGAPARVMT	Bio Ado Ado-EVPEEGPGAPARVMT-CONH2	0.00152857	\N	13	1	0	HU (DAPF)	Bait concentration was adjusted to fit the profile to WT	2023/01/17
BIN1	O00499	513-593	SH3	V583I	his6-MBP-TEVsite-SH3	ARHGAP17	Q68EM7	662-676	PxxP_2	\N	HPPSLSPKPPTRSPS	Bio E E Ado Ado-HPPSLSPKPPTRSPS-CONH2	-0.0450608	\N	13	1	0	HU (DAPF)	Bait concentration was adjusted to fit the profile to WT	2023/01/17
BIN1	O00499	513-593	SH3	V583I	his6-MBP-TEVsite-SH3	ARHGAP45	Q92619	1106-1120	PxxP_1	\N	NNVLQAPLPPMRLRG	Bio E E Ado Ado-NNVLQAPLPPMRLRG-CONH2	0.293009	\N	13	1	4.54456	HU (DAPF)	Bait concentration was adjusted to fit the profile to WT	2023/01/17
BIN1	O00499	513-593	SH3	V583I	his6-MBP-TEVsite-SH3	ATAT1	Q5SQI0	210-224	PxxP_1	\N	AAVDPTPAAPARKLP	Bio Ado Ado-AAVDPTPAAPARKLP-CONH2	0.0376959	\N	13	1	0	HU (DAPF)	Bait concentration was adjusted to fit the profile to WT	2023/01/17
BIN1	O00499	513-593	SH3	V583I	his6-MBP-TEVsite-SH3	ATAT1	Q5SQI0	293-307	PxxP_2	\N	RSLRLCPPHPTARLL	Bio Ado Ado-RSLRLCPPHPTARLL-CONH2	0.0075858	\N	13	1	0	HU (DAPF)	Bait concentration was adjusted to fit the profile to WT	2023/01/17
BIN1	O00499	513-593	SH3	V583I	his6-MBP-TEVsite-SH3	ATXN2	Q99700	112-126	PxxP_1	\N	ASPGAPPAAPTRASP	Bio Ado Ado-ASPGAPPAAPTRASP-CONH2	0.0264069	\N	13	1	0	HU (DAPF)	Bait concentration was adjusted to fit the profile to WT	2023/01/17
BIN1	O00499	513-593	SH3	V583I	his6-MBP-TEVsite-SH3	ATXN2	Q99700	139-153	PxxP_2	\N	SLARPAPGCPRPACE	Bio Ado Ado-SLARPAPGCPRPACE-CONH2	-0.0135794	\N	13	1	0	HU (DAPF)	Bait concentration was adjusted to fit the profile to WT	2023/01/17
BIN1	O00499	513-593	SH3	V583I	his6-MBP-TEVsite-SH3	ATXN2	Q99700	583-597	PxxP_3	\N	RPPSRPPSRPSRPPS	Bio Ado Ado-RPPSRPPSRPSRPPS-CONH2	0.051549	\N	13	1	3.62821	HU (DAPF)	Bait concentration was adjusted to fit the profile to WT	2023/01/17
BIN1	O00499	513-593	SH3	V583I	his6-MBP-TEVsite-SH3	ATXN2	Q99700	995-1009	PxxP_4	\N	KTYRAVPNMPQQRQD	Bio Ado Ado-KTYRAVPNMPQQRQD-CONH2	0.012545	\N	13	1	0	HU (DAPF)	Bait concentration was adjusted to fit the profile to WT	2023/01/17
BIN1	O00499	513-593	SH3	V583I	his6-MBP-TEVsite-SH3	BIRC6	Q9NR09	3927-3941	PxxP_1	\N	AVSATPPRPPSRRGR	Bio Ado Ado-AVSATPPRPPSRRGR-CONH2	0.65583	\N	13	1	5.26396	HU (DAPF)	Bait concentration was adjusted to fit the profile to WT	2023/01/17
BIN1	O00499	513-593	SH3	V583I	his6-MBP-TEVsite-SH3	BUD13	Q9BRD0	219-233	PxxP_2	\N	RHDSPDPSPPRRARH	Bio E E Ado Ado-RHDSPDPSPPRRARH-CONH2	0.142882	\N	13	1	4.12752	HU (DAPF)	Bait concentration was adjusted to fit the profile to WT	2023/01/17
BIN1	O00499	513-593	SH3	V583I	his6-MBP-TEVsite-SH3	C19orf47	Q8N9M1	147-161	PxxP_1	\N	LNHDSPPSTPPRRPD	Bio Ado Ado-LNHDSPPSTPPRRPD-CONH2	0.00730779	\N	13	1	0	HU (DAPF)	Bait concentration was adjusted to fit the profile to WT	2023/01/17
BIN1	O00499	513-593	SH3	V583I	his6-MBP-TEVsite-SH3	CAMSAP1	Q5T5Y3	1359-1373	PxxP_1	\N	GKPKSKPKKPRPKSV	Bio Ado Ado-GKPKSKPKKPRPKSV-CONH2	-0.00583688	\N	13	1	0	HU (DAPF)	Bait concentration was adjusted to fit the profile to WT	2023/01/17
BIN1	O00499	513-593	SH3	V583I	his6-MBP-TEVsite-SH3	CAMSAP1	Q5T5Y3	1586-1600	PxxP_2	\N	LWQPKRPAVPKKAQT	Bio Ado Ado-LWQPKRPAVPKKAQT-CONH2	0.0194427	\N	13	1	0	HU (DAPF)	Bait concentration was adjusted to fit the profile to WT	2023/01/17
BIN1	O00499	513-593	SH3	V583I	his6-MBP-TEVsite-SH3	CAMSAP1	Q5T5Y3	414-428	PxxP_3	\N	AFSPSHPLLPLRQKQ	Bio Ado Ado-AFSPSHPLLPLRQKQ-CONH2	0.000472931	\N	13	1	0	HU (DAPF)	Bait concentration was adjusted to fit the profile to WT	2023/01/17
BIN1	O00499	513-593	SH3	V583I	his6-MBP-TEVsite-SH3	CAPRIN1	Q14444	687-701	PxxP_1	\N	PRGRGGPPRPNRGMP	Bio Ado Ado-PRGRGGPPRPNRGMP-CONH2	0.0119146	0.00398985	13	2	0	HU (DAPF)	Bait concentration was adjusted to fit the profile to WT	2023/01/17
BIN1	O00499	513-593	SH3	V583I	his6-MBP-TEVsite-SH3	CARMIL2	Q6F5E8	1030-1044	PxxP_1	\N	HHHRPPPGGPQVPPA	Bio Ado Ado-HHHRPPPGGPQVPPA-CONH2	0.00347409	\N	13	1	0	HU (DAPF)	Bait concentration was adjusted to fit the profile to WT	2023/01/17
BIN1	O00499	513-593	SH3	V583I	his6-MBP-TEVsite-SH3	CARMIL2	Q6F5E8	1133-1147	PxxP_2	\N	GDLLRPPTRPSRGEE	Bio Ado Ado-GDLLRPPTRPSRGEE-CONH2	-0.0102086	\N	13	1	0	HU (DAPF)	Bait concentration was adjusted to fit the profile to WT	2023/01/17
BIN1	O00499	513-593	SH3	V583I	his6-MBP-TEVsite-SH3	CARMIL2	Q6F5E8	1408-1422	PxxP_3	\N	PPQPTEPSSPERSPP	Bio Ado Ado-PPQPTEPSSPERSPP-CONH2	-0.027596	\N	13	1	0	HU (DAPF)	Bait concentration was adjusted to fit the profile to WT	2023/01/17
BIN1	O00499	513-593	SH3	V583I	his6-MBP-TEVsite-SH3	CASKIN2	Q8WXE0	1121-1135	PxxP_1	\N	PRLGPRPVPPPRPES	Bio Ado Ado-PRLGPRPVPPPRPES-CONH2	0.026208	\N	13	1	0	HU (DAPF)	Bait concentration was adjusted to fit the profile to WT	2023/01/17
BIN1	O00499	513-593	SH3	V583I	his6-MBP-TEVsite-SH3	CASKIN2	Q8WXE0	683-697	PxxP_2	\N	GGPEPLPLPPARSPS	Bio Ado Ado-GGPEPLPLPPARSPS-CONH2	0.00533629	\N	13	1	0	HU (DAPF)	Bait concentration was adjusted to fit the profile to WT	2023/01/17
BIN1	O00499	513-593	SH3	V583I	his6-MBP-TEVsite-SH3	CASKIN2	Q8WXE0	782-796	PxxP_3	\N	AGPPATPPDPPRPKR	Bio Ado Ado-AGPPATPPDPPRPKR-CONH2	0.0338885	\N	13	1	0	HU (DAPF)	Bait concentration was adjusted to fit the profile to WT	2023/01/17
BIN1	O00499	513-593	SH3	V583I	his6-MBP-TEVsite-SH3	CASKIN2	Q8WXE0	785-799	PxxP_4	\N	PATPPDPPRPKRRSH	Bio Ado Ado-PATPPDPPRPKRRSH-CONH2	0.158367	\N	13	1	4.18229	HU (DAPF)	Bait concentration was adjusted to fit the profile to WT	2023/01/17
BIN1	O00499	513-593	SH3	V583I	his6-MBP-TEVsite-SH3	CASKIN2	Q8WXE0	862-876	PxxP_5	\N	RARRKGPPPPPPKRL	Bio Ado Ado-RARRKGPPPPPPKRL-CONH2	0.496945	\N	13	1	4.95282	HU (DAPF)	Bait concentration was adjusted to fit the profile to WT	2023/01/17
BIN1	O00499	513-593	SH3	V583I	his6-MBP-TEVsite-SH3	CASKIN2	Q8WXE0	863-877	PxxP_6	\N	ARRKGPPPPPPKRLS	Bio Ado Ado-ARRKGPPPPPPKRLS-CONH2	0.420793	0.0075738	13	2	4.80751	HU (DAPF)	Bait concentration was adjusted to fit the profile to WT	2023/01/17
BIN1	O00499	513-593	SH3	V583I	his6-MBP-TEVsite-SH3	CASKIN2	Q8WXE0	864-878	PxxP_7	\N	RRKGPPPPPPKRLSS	Bio Ado Ado-RRKGPPPPPPKRLSS-CONH2	0.422856	\N	13	1	4.8115	HU (DAPF)	Bait concentration was adjusted to fit the profile to WT	2023/01/17
BIN1	O00499	513-593	SH3	V583I	his6-MBP-TEVsite-SH3	CASKIN2	Q8WXE0	960-974	PxxP_8	\N	IKQRPKPAGPPPRET	Bio Ado Ado-IKQRPKPAGPPPRET-CONH2	0.0195096	\N	13	1	0	HU (DAPF)	Bait concentration was adjusted to fit the profile to WT	2023/01/17
BIN1	O00499	513-593	SH3	V583I	his6-MBP-TEVsite-SH3	CASKIN2	Q8WXE0	969-983	PxxP_9	\N	PPPRETPVPPGLDFN	Bio Ado Ado-PPPRETPVPPGLDFN-CONH2	-0.0109368	\N	13	1	0	HU (DAPF)	Bait concentration was adjusted to fit the profile to WT	2023/01/17
BIN1	O00499	513-593	SH3	V583I	his6-MBP-TEVsite-SH3	CAST	P20810	12-26	PxxP_1	\N	SQQMEGPHLPNKKKH	Bio Ado Ado-SQQMEGPHLPNKKKH-CONH2	-0.0459614	\N	13	1	0	HU (DAPF)	Bait concentration was adjusted to fit the profile to WT	2023/01/17
BIN1	O00499	513-593	SH3	V583I	his6-MBP-TEVsite-SH3	CAST	P20810	379-393	PxxP_2	\N	SECKEKPSKPTEKTE	Bio Ado Ado-SECKEKPSKPTEKTE-CONH2	-0.0293665	\N	13	1	0	HU (DAPF)	Bait concentration was adjusted to fit the profile to WT	2023/01/17
BIN1	O00499	513-593	SH3	V583I	his6-MBP-TEVsite-SH3	CC2D1A	Q6P1N0	3-17	PxxP_1	\N	KRKGPPGPPGRGAAA	Bio Ado Ado-KRKGPPGPPGRGAAA-CONH2	-0.0274879	0.0102662	13	3	0	HU (DAPF)	Bait concentration was adjusted to fit the profile to WT	2023/01/17
BIN1	O00499	513-593	SH3	V583I	his6-MBP-TEVsite-SH3	CD2AP	Q9Y5K6	335-349	PxxP_1	\N	FPKPKKPPPPAKAPA	Bio Ado Ado-FPKPKKPPPPAKAPA-CONH2	-0.0607835	\N	13	1	0	HU (DAPF)	Bait concentration was adjusted to fit the profile to WT	2023/01/17
BIN1	O00499	513-593	SH3	V583I	his6-MBP-TEVsite-SH3	CD2AP	Q9Y5K6	379-393	PxxP_2	\N	PSKPAAPQVPPKKPT	Bio Ado Ado-PSKPAAPQVPPKKPT-CONH2	0.0563372	\N	13	1	3.66963	HU (DAPF)	Bait concentration was adjusted to fit the profile to WT	2023/01/17
BIN1	O00499	513-593	SH3	V583I	his6-MBP-TEVsite-SH3	CD2AP	Q9Y5K6	386-400	PxxP_3	\N	QVPPKKPTPPTKASN	Bio Ado Ado-QVPPKKPTPPTKASN-CONH2	0.026797	\N	13	1	0	HU (DAPF)	Bait concentration was adjusted to fit the profile to WT	2023/01/17
BIN1	O00499	513-593	SH3	V583I	his6-MBP-TEVsite-SH3	CD2AP	Q9Y5K6	404-418	PxxP_4	\N	SSGTVYPKRPEKPVP	Bio Ado Ado-SSGTVYPKRPEKPVP-CONH2	-0.0310925	\N	13	1	0	HU (DAPF)	Bait concentration was adjusted to fit the profile to WT	2023/01/17
BIN1	O00499	513-593	SH3	V583I	his6-MBP-TEVsite-SH3	CD2AP	Q9Y5K6	412-426	PxxP_5	\N	RPEKPVPPPPPIAKI	Bio Ado Ado-RPEKPVPPPPPIAKI-CONH2	-0.00300089	\N	13	1	0	HU (DAPF)	Bait concentration was adjusted to fit the profile to WT	2023/01/17
BIN1	O00499	513-593	SH3	V583I	his6-MBP-TEVsite-SH3	CD2AP	Q9Y5K6	488-502	PxxP_6	\N	HLTANRPKMPGRRLP	Bio Ado Ado-HLTANRPKMPGRRLP-CONH2	0.0202697	\N	13	1	0	HU (DAPF)	Bait concentration was adjusted to fit the profile to WT	2023/01/17
BIN1	O00499	513-593	SH3	V583I	his6-MBP-TEVsite-SH3	CD3EAP	O15446	317-331	PxxP_1	\N	PLEEAIPLPPTKKRK	Bio Ado Ado-PLEEAIPLPPTKKRK-CONH2	0.0395195	\N	13	1	0	HU (DAPF)	Bait concentration was adjusted to fit the profile to WT	2023/01/17
BIN1	O00499	513-593	SH3	V583I	his6-MBP-TEVsite-SH3	CDC27	P30260	396-410	PxxP_1	\N	LKMKFPPKIPNRKTK	Bio E E Ado Ado-LKMKFPPKIPNRKTK-CONH2	0.532341	\N	13	1	5.02001	HU (DAPF)	Bait concentration was adjusted to fit the profile to WT	2023/01/17
BIN1	O00499	513-593	SH3	V583I	his6-MBP-TEVsite-SH3	CDT1	Q9H211	48-62	PxxP_1	\N	RKRARPPAAPGRDQA	Bio Ado Ado-RKRARPPAAPGRDQA-CONH2	-0.0283371	\N	13	1	0	HU (DAPF)	Bait concentration was adjusted to fit the profile to WT	2023/01/17
BIN1	O00499	513-593	SH3	V583I	his6-MBP-TEVsite-SH3	CDT1	Q9H211	9-23	PxxP_2	\N	FFARRRPGPPRIAPP	Bio Ado Ado-FFARRRPGPPRIAPP-CONH2	-0.0702821	\N	13	1	0	HU (DAPF)	Bait concentration was adjusted to fit the profile to WT	2023/01/17
BIN1	O00499	513-593	SH3	V583I	his6-MBP-TEVsite-SH3	CENPT	Q96BT3	19-33	PxxP_1	\N	VLDTADPRTPRRPRS	Bio Ado Ado-VLDTADPRTPRRPRS-CONH2	-0.0221054	\N	13	1	0	HU (DAPF)	Bait concentration was adjusted to fit the profile to WT	2023/01/17
BIN1	O00499	513-593	SH3	V583I	his6-MBP-TEVsite-SH3	CENPT	Q96BT3	283-297	PxxP_2	\N	GLQKNSPGKPAQFLA	Bio Ado Ado-GLQKNSPGKPAQFLA-CONH2	-0.0853918	\N	13	1	0	HU (DAPF)	Bait concentration was adjusted to fit the profile to WT	2023/01/17
BIN1	O00499	513-593	SH3	V583I	his6-MBP-TEVsite-SH3	CEP170	Q5SW79	640-654	PxxP_1	\N	RRRRTLPQLPNEEKS	Bio Ado Ado-RRRRTLPQLPNEEKS-CONH2	0.345118	\N	13	1	4.65662	HU (DAPF)	Bait concentration was adjusted to fit the profile to WT	2023/01/17
BIN1	O00499	513-593	SH3	V583I	his6-MBP-TEVsite-SH3	CEP170	Q5SW79	840-854	PxxP_2	\N	TIEKPSPNIPIELIP	Bio Ado Ado-TIEKPSPNIPIELIP-CONH2	-0.0324582	\N	13	1	0	HU (DAPF)	Bait concentration was adjusted to fit the profile to WT	2023/01/17
BIN1	O00499	513-593	SH3	V583I	his6-MBP-TEVsite-SH3	CIZ1	Q9ULV3	881-895	PxxP_1	\N	TARPSQPPLPRRSTR	Bio Ado Ado-TARPSQPPLPRRSTR-CONH2	0.188201	\N	13	1	4.27714	HU (DAPF)	Bait concentration was adjusted to fit the profile to WT	2023/01/17
BIN1	O00499	513-593	SH3	V583I	his6-MBP-TEVsite-SH3	CPSF7	Q8N684	45-59	PxxP_1	\N	RSSSTEPPPPVRQEP	Bio Ado Ado-RSSSTEPPPPVRQEP-CONH2	-0.0948953	\N	13	1	0	HU (DAPF)	Bait concentration was adjusted to fit the profile to WT	2023/01/17
BIN1	O00499	513-593	SH3	V583I	his6-MBP-TEVsite-SH3	DCAF12	Q5T6F0	7-21	PxxP_1	\N	SRKRKAPASPGAGSD	Bio Ado Ado-SRKRKAPASPGAGSD-CONH2	-0.00995691	\N	13	1	0	HU (DAPF)	Bait concentration was adjusted to fit the profile to WT	2023/01/17
BIN1	O00499	513-593	SH3	V583I	his6-MBP-TEVsite-SH3	DENND1A	Q8TEH3	553-567	PxxP_1	\N	KSTGPVPAPPDRAAS	Bio Ado Ado-KSTGPVPAPPDRAAS-CONH2	-0.0495367	\N	13	1	0	HU (DAPF)	Bait concentration was adjusted to fit the profile to WT	2023/01/17
BIN1	O00499	513-593	SH3	V583I	his6-MBP-TEVsite-SH3	DENND1A	Q8TEH3	942-956	PxxP_2	\N	LRPGDPPLLPPRPPQ	Bio Ado Ado-LRPGDPPLLPPRPPQ-CONH2	-0.0348454	\N	13	1	0	HU (DAPF)	Bait concentration was adjusted to fit the profile to WT	2023/01/17
BIN1	O00499	513-593	SH3	V583I	his6-MBP-TEVsite-SH3	DIDO1	Q9BTC0	441-455	PxxP_1	\N	EKMKMKPEKPSLPKC	Bio Ado Ado-EKMKMKPEKPSLPKC-CONH2	-0.0618926	\N	13	1	0	HU (DAPF)	Bait concentration was adjusted to fit the profile to WT	2023/01/17
BIN1	O00499	513-593	SH3	V583I	his6-MBP-TEVsite-SH3	DNM2	P50570	826-840	PxxP_4	\N	PAPPQIPSRPVRIPP	Bio E E Ado Ado-PAPPQIPSRPVRIPP-CONH2	0.0478867	\N	13	1	0	HU (DAPF)	Bait concentration was adjusted to fit the profile to WT	2023/01/17
BIN1	O00499	513-593	SH3	V583I	his6-MBP-TEVsite-SH3	DNM2	P50570	838-852	PxxP_6	\N	IPPGIPPGVPSRRPP	Bio E E Ado Ado-IPPGIPPGVPSRRPP-CONH2	0.0446179	\N	13	1	0	HU (DAPF)	Bait concentration was adjusted to fit the profile to WT	2023/01/17
BIN1	O00499	513-593	SH3	V583I	his6-MBP-TEVsite-SH3	DNMT1	P26358	129-143	PxxP_1	\N	PKPLSKPRTPRRSKS	Bio E E Ado Ado-PKPLSKPRTPRRSKS-CONH2	-0.00536563	\N	13	1	0	HU (DAPF)	Bait concentration was adjusted to fit the profile to WT	2023/01/17
BIN1	O00499	513-593	SH3	V583I	his6-MBP-TEVsite-SH3	ELMSAN1	Q6PJG2	175-189	PxxP_1	\N	LDRYVRPMMPQKVQL	Bio Ado Ado-LDRYVRPMMPQKVQL-CONH2	-0.0314538	\N	13	1	0	HU (DAPF)	Bait concentration was adjusted to fit the profile to WT	2023/01/17
BIN1	O00499	513-593	SH3	V583I	his6-MBP-TEVsite-SH3	ELMSAN1	Q6PJG2	228-242	PxxP_2	\N	QVFRQGPPPPNPVAA	Bio Ado Ado-QVFRQGPPPPNPVAA-CONH2	-0.0692972	\N	13	1	0	HU (DAPF)	Bait concentration was adjusted to fit the profile to WT	2023/01/17
BIN1	O00499	513-593	SH3	V583I	his6-MBP-TEVsite-SH3	ESPL1	Q14674	1338-1352	PxxP_1	\N	LEGRGLPCTPKPPDR	Bio Ado Ado-LEGRGLPCTPKPPDR-CONH2	-0.00949649	\N	13	1	0	HU (DAPF)	Bait concentration was adjusted to fit the profile to WT	2023/01/17
BIN1	O00499	513-593	SH3	V583I	his6-MBP-TEVsite-SH3	ESPL1	Q14674	1341-1355	PxxP_2	\N	RGLPCTPKPPDRIRQ	Bio Ado Ado-RGLPCTPKPPDRIRQ-CONH2	0.233226	\N	13	1	4.40151	HU (DAPF)	Bait concentration was adjusted to fit the profile to WT	2023/01/17
BIN1	O00499	513-593	SH3	V583I	his6-MBP-TEVsite-SH3	EZH2	Q15910	341-355	PxxP_1	\N	ERIKTPPKRPGGRRR	Bio E E Ado Ado-ERIKTPPKRPGGRRR-CONH2	0.00212267	\N	13	1	0	HU (DAPF)	Bait concentration was adjusted to fit the profile to WT	2023/01/17
BIN1	O00499	513-593	SH3	V583I	his6-MBP-TEVsite-SH3	FKBPL	Q9UIM3	33-47	PxxP_1	\N	IQIRQQPRDPPTETL	Bio Ado Ado-IQIRQQPRDPPTETL-CONH2	0.00571959	\N	13	1	0	HU (DAPF)	Bait concentration was adjusted to fit the profile to WT	2023/01/17
BIN1	O00499	513-593	SH3	V583I	his6-MBP-TEVsite-SH3	G3BP2	Q9UN86	231-245	PxxP_1	\N	AEPVSLPQEPPKAFS	Bio Ado Ado-AEPVSLPQEPPKAFS-CONH2	-0.0350517	\N	13	1	0	HU (DAPF)	Bait concentration was adjusted to fit the profile to WT	2023/01/17
BIN1	O00499	513-593	SH3	V583I	his6-MBP-TEVsite-SH3	G3BP2	Q9UN86	294-308	PxxP_2	\N	QRPRERPGFPPRGPR	Bio Ado Ado-QRPRERPGFPPRGPR-CONH2	0.0272739	0.00221844	13	2	0	HU (DAPF)	Bait concentration was adjusted to fit the profile to WT	2023/01/17
BIN1	O00499	513-593	SH3	V583I	his6-MBP-TEVsite-SH3	GAR1	Q9NY12	153-167	PxxP_1	\N	PLQRFLPRPPGEKGP	Bio Ado Ado-PLQRFLPRPPGEKGP-CONH2	-0.000122979	\N	13	1	0	HU (DAPF)	Bait concentration was adjusted to fit the profile to WT	2023/01/17
BIN1	O00499	513-593	SH3	V583I	his6-MBP-TEVsite-SH3	GAS2L1	Q99501	166-180	PxxP_1	\N	RELRAAPPAPNAPAA	Bio Ado Ado-RELRAAPPAPNAPAA-CONH2	-0.0601012	\N	13	1	0	HU (DAPF)	Bait concentration was adjusted to fit the profile to WT	2023/01/17
BIN1	O00499	513-593	SH3	V583I	his6-MBP-TEVsite-SH3	GAS2L1	Q99501	185-199	PxxP_2	\N	TETAPAPGTPARGPR	Bio Ado Ado-TETAPAPGTPARGPR-CONH2	0.0365032	\N	13	1	0	HU (DAPF)	Bait concentration was adjusted to fit the profile to WT	2023/01/17
BIN1	O00499	513-593	SH3	V583I	his6-MBP-TEVsite-SH3	GAS2L1	Q99501	326-340	PxxP_3	\N	RSTKEGPETPPRPRD	Bio Ado Ado-RSTKEGPETPPRPRD-CONH2	-0.0269479	0.00916543	13	2	0	HU (DAPF)	Bait concentration was adjusted to fit the profile to WT	2023/01/17
BIN1	O00499	513-593	SH3	V583I	his6-MBP-TEVsite-SH3	GAS2L1	Q99501	386-400	PxxP_4	\N	RLTTGTPASPRRPPA	Bio Ado Ado-RLTTGTPASPRRPPA-CONH2	-0.0465602	\N	13	1	0	HU (DAPF)	Bait concentration was adjusted to fit the profile to WT	2023/01/17
BIN1	O00499	513-593	SH3	V583I	his6-MBP-TEVsite-SH3	GAS2L1	Q99501	466-480	PxxP_5	\N	GSGRSTPQTPRARSP	Bio Ado Ado-GSGRSTPQTPRARSP-CONH2	-0.0563532	\N	13	1	0	HU (DAPF)	Bait concentration was adjusted to fit the profile to WT	2023/01/17
BIN1	O00499	513-593	SH3	V583I	his6-MBP-TEVsite-SH3	GAS2L1	Q99501	644-658	PxxP_6	\N	PSRIPTPRGPRRPSG	Bio Ado Ado-PSRIPTPRGPRRPSG-CONH2	0.042806	\N	13	1	0	HU (DAPF)	Bait concentration was adjusted to fit the profile to WT	2023/01/17
BIN1	O00499	513-593	SH3	V583I	his6-MBP-TEVsite-SH3	GLCCI1	Q86VQ1	140-154	PxxP_1	\N	SPERRSPGSPVCRAD	Bio Ado Ado-SPERRSPGSPVCRAD-CONH2	0.0827768	\N	13	1	3.8527	HU (DAPF)	Bait concentration was adjusted to fit the profile to WT	2023/01/17
BIN1	O00499	513-593	SH3	V583I	his6-MBP-TEVsite-SH3	GPATCH8	Q9UKJ3	602-616	PxxP_1	\N	HLQGLDPGEPNKSKE	Bio Ado Ado-HLQGLDPGEPNKSKE-CONH2	-0.0247577	\N	13	1	0	HU (DAPF)	Bait concentration was adjusted to fit the profile to WT	2023/01/17
BIN1	O00499	513-593	SH3	V583I	his6-MBP-TEVsite-SH3	GPATCH8	Q9UKJ3	735-749	PxxP_2	\N	PPGSGSPAPPRRRRR	Bio Ado Ado-PPGSGSPAPPRRRRR-CONH2	0.708714	\N	13	1	5.37904	HU (DAPF)	Bait concentration was adjusted to fit the profile to WT	2023/01/17
BIN1	O00499	513-593	SH3	V583I	his6-MBP-TEVsite-SH3	GTSE1	Q9NYZ3	235-249	PxxP_1	\N	KPKKEIPASPSRTKI	Bio Ado Ado-KPKKEIPASPSRTKI-CONH2	-0.00832118	0.00275467	13	2	0	HU (DAPF)	Bait concentration was adjusted to fit the profile to WT	2023/01/17
BIN1	O00499	513-593	SH3	V583I	his6-MBP-TEVsite-SH3	HNRNPK	P61978	285-299	PxxP_4	\N	PRRGPPPPPPGRGGR	Bio E E Ado Ado-PRRGPPPPPPGRGGR-CONH2	0.420743	\N	13	1	4.80741	HU (DAPF)	Bait concentration was adjusted to fit the profile to WT	2023/01/17
BIN1	O00499	513-593	SH3	V583I	his6-MBP-TEVsite-SH3	IFRD2	Q12894	57-71	PxxP_1	\N	RPPRPVPGMPRARKG	Bio Ado Ado-RPPRPVPGMPRARKG-CONH2	0.0710376	\N	13	1	3.77914	HU (DAPF)	Bait concentration was adjusted to fit the profile to WT	2023/01/17
BIN1	O00499	513-593	SH3	V583I	his6-MBP-TEVsite-SH3	IQSEC1	Q6DN90	435-449	PxxP_1	\N	PELRPRPPRPLDSHL	Bio Ado Ado-PELRPRPPRPLDSHL-CONH2	-0.0428354	\N	13	1	0	HU (DAPF)	Bait concentration was adjusted to fit the profile to WT	2023/01/17
BIN1	O00499	513-593	SH3	V583I	his6-MBP-TEVsite-SH3	ITCH	Q96J02	244-258	PxxP_1	\N	SNGGFKPSRPPRPSR	Bio Ado Ado-SNGGFKPSRPPRPSR-CONH2	0.584896	\N	13	1	5.12115	HU (DAPF)	Bait concentration was adjusted to fit the profile to WT	2023/01/17
BIN1	O00499	513-593	SH3	V583I	his6-MBP-TEVsite-SH3	ITCH	Q96J02	247-261	PxxP_2	\N	GFKPSRPPRPSRPPP	Bio Ado Ado-GFKPSRPPRPSRPPP-CONH2	0.527546	\N	13	1	5.01088	HU (DAPF)	Bait concentration was adjusted to fit the profile to WT	2023/01/17
BIN1	O00499	513-593	SH3	V583I	his6-MBP-TEVsite-SH3	ITCH	Q96J02	255-269	PxxP_3	\N	RPSRPPPPTPRRPAS	Bio Ado Ado-RPSRPPPPTPRRPAS-CONH2	0.176283	0.00487635	13	2	4.24071	HU (DAPF)	Bait concentration was adjusted to fit the profile to WT	2023/01/17
BIN1	O00499	513-593	SH3	V583I	his6-MBP-TEVsite-SH3	ITCH	Q96J02	353-367	PxxP_4	\N	TWDRPEPLPPGWERR	Bio Ado Ado-TWDRPEPLPPGWERR-CONH2	-0.103389	\N	13	1	0	HU (DAPF)	Bait concentration was adjusted to fit the profile to WT	2023/01/17
BIN1	O00499	513-593	SH3	V583I	his6-MBP-TEVsite-SH3	KATNB1	Q9BVA0	323-337	PxxP_1	\N	AQPLPNPSAPLRRIY	Bio Ado Ado-AQPLPNPSAPLRRIY-CONH2	0.171386	\N	13	1	4.22521	HU (DAPF)	Bait concentration was adjusted to fit the profile to WT	2023/01/17
BIN1	O00499	513-593	SH3	V583I	his6-MBP-TEVsite-SH3	KDM2A	Q9Y2K7	545-559	PxxP_1	\N	PAPRLTPVRPAAASP	Bio Ado Ado-PAPRLTPVRPAAASP-CONH2	-0.00155142	\N	13	1	0	HU (DAPF)	Bait concentration was adjusted to fit the profile to WT	2023/01/17
BIN1	O00499	513-593	SH3	V583I	his6-MBP-TEVsite-SH3	KDM2B	Q8NHM5	1041-1055	PxxP_1	\N	HVIRPPPISPPPDSL	Bio Ado Ado-HVIRPPPISPPPDSL-CONH2	0.0228965	\N	13	1	0	HU (DAPF)	Bait concentration was adjusted to fit the profile to WT	2023/01/17
BIN1	O00499	513-593	SH3	V583I	his6-MBP-TEVsite-SH3	KDM2B	Q8NHM5	892-906	PxxP_2	\N	EPEDELPEAPPKTRE	Bio Ado Ado-EPEDELPEAPPKTRE-CONH2	-0.0251891	\N	13	1	0	HU (DAPF)	Bait concentration was adjusted to fit the profile to WT	2023/01/17
BIN1	O00499	513-593	SH3	V583I	his6-MBP-TEVsite-SH3	KIF2C	Q99661	140-154	PxxP_1	\N	RKQFSVPPAPTRPSC	Bio Ado Ado-RKQFSVPPAPTRPSC-CONH2	0.0712444	\N	13	1	3.78053	HU (DAPF)	Bait concentration was adjusted to fit the profile to WT	2023/01/17
BIN1	O00499	513-593	SH3	V583I	his6-MBP-TEVsite-SH3	KIFC1	Q9BW19	104-118	PxxP_1	\N	KNQKPVPAVPVQKSG	Bio Ado Ado-KNQKPVPAVPVQKSG-CONH2	0.00372233	\N	13	1	0	HU (DAPF)	Bait concentration was adjusted to fit the profile to WT	2023/01/17
BIN1	O00499	513-593	SH3	V583I	his6-MBP-TEVsite-SH3	KIFC1	Q9BW19	358-372	PxxP_2	\N	GTLSGAPAPPTRHDF	Bio Ado Ado-GTLSGAPAPPTRHDF-CONH2	-0.00580151	\N	13	1	0	HU (DAPF)	Bait concentration was adjusted to fit the profile to WT	2023/01/17
BIN1	O00499	513-593	SH3	V583I	his6-MBP-TEVsite-SH3	LENG1	Q96BZ8	184-198	PxxP_1	\N	GSEKQRPKEPPSLDQ	Bio Ado Ado-GSEKQRPKEPPSLDQ-CONH2	-0.00732392	\N	13	1	0	HU (DAPF)	Bait concentration was adjusted to fit the profile to WT	2023/01/17
BIN1	O00499	513-593	SH3	V583I	his6-MBP-TEVsite-SH3	LMNB1	P20700	15-29	PxxP_1	\N	AGGPTTPLSPTRLSR	Bio Ado Ado-AGGPTTPLSPTRLSR-CONH2	0.0118566	\N	13	1	0	HU (DAPF)	Bait concentration was adjusted to fit the profile to WT	2023/01/17
BIN1	O00499	513-593	SH3	V583I	his6-MBP-TEVsite-SH3	LRRC41	Q15345	352-366	PxxP_1	\N	PGTKRSPSAPAATSS	Bio Ado Ado-PGTKRSPSAPAATSS-CONH2	0.000230481	\N	13	1	0	HU (DAPF)	Bait concentration was adjusted to fit the profile to WT	2023/01/17
BIN1	O00499	513-593	SH3	V583I	his6-MBP-TEVsite-SH3	LRRC41	Q15345	560-574	PxxP_2	\N	PSQRDNPGVPGNAGP	Bio Ado Ado-PSQRDNPGVPGNAGP-CONH2	0.0201373	\N	13	1	0	HU (DAPF)	Bait concentration was adjusted to fit the profile to WT	2023/01/17
BIN1	O00499	513-593	SH3	V583I	his6-MBP-TEVsite-SH3	LUZP1	Q86V48	1062-1076	PxxP_1	\N	AEERLRPTRPCAEEN	Bio Ado Ado-AEERLRPTRPCAEEN-CONH2	-0.0154709	\N	13	1	0	HU (DAPF)	Bait concentration was adjusted to fit the profile to WT	2023/01/17
BIN1	O00499	513-593	SH3	V583I	his6-MBP-TEVsite-SH3	MAP2K7	O14733	285-299	PxxP_1	\N	APERIDPPDPTKPDY	Bio Ado Ado-APERIDPPDPTKPDY-CONH2	0.00916756	0.000801026	13	2	0	HU (DAPF)	Bait concentration was adjusted to fit the profile to WT	2023/01/17
BIN1	O00499	513-593	SH3	V583I	his6-MBP-TEVsite-SH3	MAP2K7	O14733	59-73	PxxP_2	\N	ESSPQHPTPPARPRH	Bio Ado Ado-ESSPQHPTPPARPRH-CONH2	0.104084	\N	13	1	3.96531	HU (DAPF)	Bait concentration was adjusted to fit the profile to WT	2023/01/17
BIN1	O00499	513-593	SH3	V583I	his6-MBP-TEVsite-SH3	MAP4K5	Q9Y4K4	384-398	PxxP_1	\N	SKRAIPPPLPPKPRI	Bio Ado Ado-SKRAIPPPLPPKPRI-CONH2	0.00677811	\N	13	1	0	HU (DAPF)	Bait concentration was adjusted to fit the profile to WT	2023/01/17
BIN1	O00499	513-593	SH3	V583I	his6-MBP-TEVsite-SH3	MAP4K5	Q9Y4K4	461-475	PxxP_2	\N	EGSAQAPQLPRKKDK	Bio Ado Ado-EGSAQAPQLPRKKDK-CONH2	0.0372447	\N	13	1	0	HU (DAPF)	Bait concentration was adjusted to fit the profile to WT	2023/01/17
BIN1	O00499	513-593	SH3	V583I	his6-MBP-TEVsite-SH3	MDC1	Q14676	1040-1054	PxxP_1	\N	PTVPEAPAPPQKPLN	Bio Ado Ado-PTVPEAPAPPQKPLN-CONH2	-0.00873511	\N	13	1	0	HU (DAPF)	Bait concentration was adjusted to fit the profile to WT	2023/01/17
BIN1	O00499	513-593	SH3	V583I	his6-MBP-TEVsite-SH3	MDC1	Q14676	990-1004	PxxP_2	\N	SGGRGSPVSPRRHQK	Bio Ado Ado-SGGRGSPVSPRRHQK-CONH2	0.0401533	0.00970943	13	2	0	HU (DAPF)	Bait concentration was adjusted to fit the profile to WT	2023/01/17
BIN1	O00499	513-593	SH3	V583I	his6-MBP-TEVsite-SH3	MICALL1	Q8N3F8	272-286	PxxP_1	\N	ASPEARPQIPTKPRV	Bio Ado Ado-ASPEARPQIPTKPRV-CONH2	0.00936356	\N	13	1	0	HU (DAPF)	Bait concentration was adjusted to fit the profile to WT	2023/01/17
BIN1	O00499	513-593	SH3	V583I	his6-MBP-TEVsite-SH3	MICALL1	Q8N3F8	278-292	PxxP_2	\N	PQIPTKPRVPGKLQE	Bio Ado Ado-PQIPTKPRVPGKLQE-CONH2	-0.0241971	\N	13	1	0	HU (DAPF)	Bait concentration was adjusted to fit the profile to WT	2023/01/17
BIN1	O00499	513-593	SH3	V583I	his6-MBP-TEVsite-SH3	MICALL1	Q8N3F8	379-393	PxxP_3	\N	PKKKPAPLPPSSSPG	Bio Ado Ado-PKKKPAPLPPSSSPG-CONH2	0.0212601	\N	13	1	0	HU (DAPF)	Bait concentration was adjusted to fit the profile to WT	2023/01/17
BIN1	O00499	513-593	SH3	V583I	his6-MBP-TEVsite-SH3	MICALL1	Q8N3F8	474-488	PxxP_4	\N	TKKRPAPRAPSASPL	Bio Ado Ado-TKKRPAPRAPSASPL-CONH2	0.0313052	\N	13	1	0	HU (DAPF)	Bait concentration was adjusted to fit the profile to WT	2023/01/17
BIN1	O00499	513-593	SH3	V583I	his6-MBP-TEVsite-SH3	MORC2	Q9Y6X9	620-634	PxxP_1	\N	AVIRNAPSRPPSLPT	Bio Ado Ado-AVIRNAPSRPPSLPT-CONH2	-0.00550012	\N	13	1	0	HU (DAPF)	Bait concentration was adjusted to fit the profile to WT	2023/01/17
BIN1	O00499	513-593	SH3	V583I	his6-MBP-TEVsite-SH3	MORC2	Q9Y6X9	665-679	PxxP_2	\N	SRLLQPPEAPRKPAN	Bio Ado Ado-SRLLQPPEAPRKPAN-CONH2	-0.00889291	\N	13	1	0	HU (DAPF)	Bait concentration was adjusted to fit the profile to WT	2023/01/17
BIN1	O00499	513-593	SH3	V583I	his6-MBP-TEVsite-SH3	MORC2	Q9Y6X9	725-739	PxxP_3	\N	SPIKLSPATPSRKRS	Bio Ado Ado-SPIKLSPATPSRKRS-CONH2	0.161286	0.00218295	13	2	4.19215	HU (DAPF)	Bait concentration was adjusted to fit the profile to WT	2023/01/17
BIN1	O00499	513-593	SH3	V583I	his6-MBP-TEVsite-SH3	MORF4L1	Q9UBU8	163-177	PxxP_1	\N	GSTSETPQPPRKKRA	Bio Ado Ado-GSTSETPQPPRKKRA-CONH2	0.0422804	\N	13	1	0	HU (DAPF)	Bait concentration was adjusted to fit the profile to WT	2023/01/17
BIN1	O00499	513-593	SH3	V583I	his6-MBP-TEVsite-SH3	MORF4L2	Q15014	47-61	PxxP_1	\N	QQKNLEPALPGRWGG	Bio Ado Ado-QQKNLEPALPGRWGG-CONH2	-0.00968556	\N	13	1	0	HU (DAPF)	Bait concentration was adjusted to fit the profile to WT	2023/01/17
BIN1	O00499	513-593	SH3	V583I	his6-MBP-TEVsite-SH3	MORF4L2	Q15014	89-103	PxxP_2	\N	GSTSEAPQPPRKKRA	Bio Ado Ado-GSTSEAPQPPRKKRA-CONH2	0.053281	\N	13	1	3.64359	HU (DAPF)	Bait concentration was adjusted to fit the profile to WT	2023/01/17
BIN1	O00499	513-593	SH3	V583I	his6-MBP-TEVsite-SH3	MRPS12	O15235	36-50	PxxP_1	\N	MHRLGPPKRPPRKLG	Bio Ado Ado-MHRLGPPKRPPRKLG-CONH2	0.576172	\N	13	1	5.10417	HU (DAPF)	Bait concentration was adjusted to fit the profile to WT	2023/01/17
BIN1	O00499	513-593	SH3	V583I	his6-MBP-TEVsite-SH3	MYBL2	P10244	525-539	PxxP_1	\N	ALEKYGPLKPLPQTP	Bio Ado Ado-ALEKYGPLKPLPQTP-CONH2	-0.0145625	\N	13	1	0	HU (DAPF)	Bait concentration was adjusted to fit the profile to WT	2023/01/17
BIN1	O00499	513-593	SH3	V583I	his6-MBP-TEVsite-SH3	MYBL2	P10244	530-544	PxxP_2	\N	GPLKPLPQTPHLEED	Bio Ado Ado-GPLKPLPQTPHLEED-CONH2	-0.0279885	\N	13	1	0	HU (DAPF)	Bait concentration was adjusted to fit the profile to WT	2023/01/17
BIN1	O00499	513-593	SH3	V583I	his6-MBP-TEVsite-SH3	NCKIPSD	Q9NZQ3	165-179	PxxP_1	\N	LPSSQIPPQPRRAAP	Bio Ado Ado-LPSSQIPPQPRRAAP-CONH2	0.0272942	\N	13	1	0	HU (DAPF)	Bait concentration was adjusted to fit the profile to WT	2023/01/17
BIN1	O00499	513-593	SH3	V583I	his6-MBP-TEVsite-SH3	NCKIPSD	Q9NZQ3	173-187	PxxP_2	\N	QPRRAAPTTPPPPVK	Bio Ado Ado-QPRRAAPTTPPPPVK-CONH2	-0.0264154	\N	13	1	0	HU (DAPF)	Bait concentration was adjusted to fit the profile to WT	2023/01/17
BIN1	O00499	513-593	SH3	V583I	his6-MBP-TEVsite-SH3	NCKIPSD	Q9NZQ3	176-190	PxxP_3	\N	RAAPTTPPPPVKRRD	Bio Ado Ado-RAAPTTPPPPVKRRD-CONH2	0.010936	\N	13	1	0	HU (DAPF)	Bait concentration was adjusted to fit the profile to WT	2023/01/17
BIN1	O00499	513-593	SH3	V583I	his6-MBP-TEVsite-SH3	NCKIPSD	Q9NZQ3	238-252	PxxP_4	\N	SCSPTPPPVPRRGTH	Bio Ado Ado-SCSPTPPPVPRRGTH-CONH2	0.306229	\N	13	1	4.57387	HU (DAPF)	Bait concentration was adjusted to fit the profile to WT	2023/01/17
BIN1	O00499	513-593	SH3	V583I	his6-MBP-TEVsite-SH3	NUP153	P49790	252-266	PxxP_1	\N	SQLGDSPFYPGKTTY	Bio Ado Ado-SQLGDSPFYPGKTTY-CONH2	0.0432479	\N	13	1	0	HU (DAPF)	Bait concentration was adjusted to fit the profile to WT	2023/01/17
BIN1	O00499	513-593	SH3	V583I	his6-MBP-TEVsite-SH3	PAN3	Q58A45	105-119	PxxP_1	\N	GGGAGPPPGPKKPDL	Bio Ado Ado-GGGAGPPPGPKKPDL-CONH2	-0.0429407	\N	13	1	0	HU (DAPF)	Bait concentration was adjusted to fit the profile to WT	2023/01/17
BIN1	O00499	513-593	SH3	V583I	his6-MBP-TEVsite-SH3	PDCD6IP	Q8WUM4	746-760	PxxP_1	\N	TMPPTKPQPPARPPP	Bio Ado Ado-TMPPTKPQPPARPPP-CONH2	-0.00294132	\N	13	1	0	HU (DAPF)	Bait concentration was adjusted to fit the profile to WT	2023/01/17
BIN1	O00499	513-593	SH3	V583I	his6-MBP-TEVsite-SH3	PDS5A	Q29RF7	1256-1270	PxxP_1	\N	KVDESGPPAPSKPRR	Bio Ado Ado-KVDESGPPAPSKPRR-CONH2	0.0121487	\N	13	1	0	HU (DAPF)	Bait concentration was adjusted to fit the profile to WT	2023/01/17
BIN1	O00499	513-593	SH3	V583I	his6-MBP-TEVsite-SH3	PDS5A	Q29RF7	1259-1273	PxxP_2	\N	ESGPPAPSKPRRGRR	Bio Ado Ado-ESGPPAPSKPRRGRR-CONH2	0.371611	\N	13	1	4.71065	HU (DAPF)	Bait concentration was adjusted to fit the profile to WT	2023/01/17
BIN1	O00499	513-593	SH3	V583I	his6-MBP-TEVsite-SH3	PEX1	O43933	1156-1170	PxxP_1	\N	SMTQDLPGVPGKDQL	Bio Ado Ado-SMTQDLPGVPGKDQL-CONH2	-0.0222821	\N	13	1	0	HU (DAPF)	Bait concentration was adjusted to fit the profile to WT	2023/01/17
BIN1	O00499	513-593	SH3	V583I	his6-MBP-TEVsite-SH3	PHACTR4	Q8IZ21	161-175	PxxP_1	\N	ENVPKPPLLPPKRPL	Bio Ado Ado-ENVPKPPLLPPKRPL-CONH2	0.0246933	\N	13	1	0	HU (DAPF)	Bait concentration was adjusted to fit the profile to WT	2023/01/17
BIN1	O00499	513-593	SH3	V583I	his6-MBP-TEVsite-SH3	PHACTR4	Q8IZ21	229-243	PxxP_2	\N	PAPRTLPAAPASTNT	Bio Ado Ado-PAPRTLPAAPASTNT-CONH2	-0.0024871	\N	13	1	0	HU (DAPF)	Bait concentration was adjusted to fit the profile to WT	2023/01/17
BIN1	O00499	513-593	SH3	V583I	his6-MBP-TEVsite-SH3	PHACTR4	Q8IZ21	253-267	PxxP_3	\N	VPAKQPPIPPPKPAH	Bio Ado Ado-VPAKQPPIPPPKPAH-CONH2	-0.0101956	0.0401148	13	2	0	HU (DAPF)	Bait concentration was adjusted to fit the profile to WT	2023/01/17
BIN1	O00499	513-593	SH3	V583I	his6-MBP-TEVsite-SH3	PHACTR4	Q8IZ21	286-300	PxxP_4	\N	LLSKPSPPLPPKRGI	Bio Ado Ado-LLSKPSPPLPPKRGI-CONH2	0.30393	0.00225546	13	2	4.56882	HU (DAPF)	Bait concentration was adjusted to fit the profile to WT	2023/01/17
BIN1	O00499	513-593	SH3	V583I	his6-MBP-TEVsite-SH3	PHACTR4	Q8IZ21	287-301	PxxP_5	\N	LSKPSPPLPPKRGIP	Bio Ado Ado-LSKPSPPLPPKRGIP-CONH2	0.220835	\N	13	1	4.36905	HU (DAPF)	Bait concentration was adjusted to fit the profile to WT	2023/01/17
BIN1	O00499	513-593	SH3	V583I	his6-MBP-TEVsite-SH3	PHACTR4	Q8IZ21	346-360	PxxP_6	\N	PLPTHIPPEPPRTPP	Bio Ado Ado-PLPTHIPPEPPRTPP-CONH2	-0.0765211	\N	13	1	0	HU (DAPF)	Bait concentration was adjusted to fit the profile to WT	2023/01/17
BIN1	O00499	513-593	SH3	V583I	his6-MBP-TEVsite-SH3	PHACTR4	Q8IZ21	353-367	PxxP_7	\N	PEPPRTPPFPAKTFQ	Bio Ado Ado-PEPPRTPPFPAKTFQ-CONH2	-0.0242976	\N	13	1	0	HU (DAPF)	Bait concentration was adjusted to fit the profile to WT	2023/01/17
BIN1	O00499	513-593	SH3	V583I	his6-MBP-TEVsite-SH3	PHACTR4	Q8IZ21	400-414	PxxP_8	\N	DQNFGEPHIPSRLPP	Bio Ado Ado-DQNFGEPHIPSRLPP-CONH2	-0.0766504	\N	13	1	0	HU (DAPF)	Bait concentration was adjusted to fit the profile to WT	2023/01/17
BIN1	O00499	513-593	SH3	V583I	his6-MBP-TEVsite-SH3	PI4K2B	Q8TCG2	1-12	PxxP_1	\N	___MEDPSEPDRLAS	Bio Ado Ado-___MEDPSEPDRLAS-CONH2	-0.0373471	\N	13	1	0	HU (DAPF)	Bait concentration was adjusted to fit the profile to WT	2023/01/17
BIN1	O00499	513-593	SH3	V583I	his6-MBP-TEVsite-SH3	PKMYT1	Q99640	46-60	PxxP_1	\N	GLSRSLPPPPPAKGS	Bio Ado Ado-GLSRSLPPPPPAKGS-CONH2	-0.00413207	\N	13	1	0	HU (DAPF)	Bait concentration was adjusted to fit the profile to WT	2023/01/17
BIN1	O00499	513-593	SH3	V583I	his6-MBP-TEVsite-SH3	PKMYT1	Q99640	47-61	PxxP_2	\N	LSRSLPPPPPAKGSI	Bio Ado Ado-LSRSLPPPPPAKGSI-CONH2	-0.116682	\N	13	1	0	HU (DAPF)	Bait concentration was adjusted to fit the profile to WT	2023/01/17
BIN1	O00499	513-593	SH3	V583I	his6-MBP-TEVsite-SH3	POM121	Q96HA1	140-154	PxxP_1	\N	YLGKPGPPQPAAAPE	Bio Ado Ado-YLGKPGPPQPAAAPE-CONH2	-0.00280859	\N	13	1	0	HU (DAPF)	Bait concentration was adjusted to fit the profile to WT	2023/01/17
BIN1	O00499	513-593	SH3	V583I	his6-MBP-TEVsite-SH3	POM121	Q96HA1	161-175	PxxP_2	\N	RPGRRPPARPAPRSP	Bio Ado Ado-RPGRRPPARPAPRSP-CONH2	0.100302	\N	13	1	3.94688	HU (DAPF)	Bait concentration was adjusted to fit the profile to WT	2023/01/17
BIN1	O00499	513-593	SH3	V583I	his6-MBP-TEVsite-SH3	POM121	Q96HA1	166-180	PxxP_3	\N	PPARPAPRSPPPRSP	Bio Ado Ado-PPARPAPRSPPPRSP-CONH2	-0.0029934	\N	13	1	0	HU (DAPF)	Bait concentration was adjusted to fit the profile to WT	2023/01/17
BIN1	O00499	513-593	SH3	V583I	his6-MBP-TEVsite-SH3	POM121	Q96HA1	180-194	PxxP_4	\N	PPPRSPPPSPPTHRA	Bio Ado Ado-PPPRSPPPSPPTHRA-CONH2	-0.0294247	\N	13	1	0	HU (DAPF)	Bait concentration was adjusted to fit the profile to WT	2023/01/17
BIN1	O00499	513-593	SH3	V583I	his6-MBP-TEVsite-SH3	POM121	Q96HA1	442-456	PxxP_5	\N	SSRSQTPERPAKKIR	Bio Ado Ado-SSRSQTPERPAKKIR-CONH2	0.0776684	\N	13	1	3.82192	HU (DAPF)	Bait concentration was adjusted to fit the profile to WT	2023/01/17
BIN1	O00499	513-593	SH3	V583I	his6-MBP-TEVsite-SH3	POM121	Q96HA1	737-751	PxxP_6	\N	KSEKEGPTPPGPSVT	Bio Ado Ado-KSEKEGPTPPGPSVT-CONH2	-0.0214704	\N	13	1	0	HU (DAPF)	Bait concentration was adjusted to fit the profile to WT	2023/01/17
BIN1	O00499	513-593	SH3	V583I	his6-MBP-TEVsite-SH3	POM121C	A8CG34	127-141	PxxP_1	\N	YLGKPGPPQPAPAPE	Bio Ado Ado-YLGKPGPPQPAPAPE-CONH2	0.0128424	\N	13	1	0	HU (DAPF)	Bait concentration was adjusted to fit the profile to WT	2023/01/17
BIN1	O00499	513-593	SH3	V583I	his6-MBP-TEVsite-SH3	POM121C	A8CG34	148-162	PxxP_2	\N	RPGRRPPARPAPRST	Bio Ado Ado-RPGRRPPARPAPRST-CONH2	0.124113	\N	13	1	4.05434	HU (DAPF)	Bait concentration was adjusted to fit the profile to WT	2023/01/17
BIN1	O00499	513-593	SH3	V583I	his6-MBP-TEVsite-SH3	POM121C	A8CG34	419-433	PxxP_3	\N	SSRSQTPERPAKKIR	Bio Ado Ado-SSRSQTPERPAKKIR-CONH2	0.0177482	\N	13	1	0	HU (DAPF)	Bait concentration was adjusted to fit the profile to WT	2023/01/17
BIN1	O00499	513-593	SH3	V583I	his6-MBP-TEVsite-SH3	PPP1CA	P62136	312-326	PxxP_1	\N	LNPGGRPITPPRNSA	Bio Ado Ado-LNPGGRPITPPRNSA-CONH2	0.0406763	\N	13	1	0	HU (DAPF)	Bait concentration was adjusted to fit the profile to WT	2023/01/17
BIN1	O00499	513-593	SH3	V583I	his6-MBP-TEVsite-SH3	PPP1CB	P62140	308-322	PxxP_1	\N	GLNSGRPVTPPRTAN	Bio Ado Ado-GLNSGRPVTPPRTAN-CONH2	0.0312854	\N	13	1	0	HU (DAPF)	Bait concentration was adjusted to fit the profile to WT	2023/01/17
BIN1	O00499	513-593	SH3	V583I	his6-MBP-TEVsite-SH3	PPP1CC	P36873	303-317	PxxP_1	\N	KPNATRPVTPPRGMI	Bio Ado Ado-KPNATRPVTPPRGMI-CONH2	0.0552939	\N	13	1	3.66089	HU (DAPF)	Bait concentration was adjusted to fit the profile to WT	2023/01/17
BIN1	O00499	513-593	SH3	V583I	his6-MBP-TEVsite-SH3	PPP1R10	Q96QC0	498-512	PxxP_1	\N	FLNKESPHEPDPEPY	Bio Ado Ado-FLNKESPHEPDPEPY-CONH2	0.0301327	\N	13	1	0	HU (DAPF)	Bait concentration was adjusted to fit the profile to WT	2023/01/17
BIN1	O00499	513-593	SH3	V583I	his6-MBP-TEVsite-SH3	PPP1R10	Q96QC0	663-677	PxxP_2	\N	GPRLLGPPPPPRGGD	Bio Ado Ado-GPRLLGPPPPPRGGD-CONH2	-0.00344568	\N	13	1	0	HU (DAPF)	Bait concentration was adjusted to fit the profile to WT	2023/01/17
BIN1	O00499	513-593	SH3	V583I	his6-MBP-TEVsite-SH3	PPP1R10	Q96QC0	677-691	PxxP_3	\N	DPFWDGPGDPMRGGP	Bio Ado Ado-DPFWDGPGDPMRGGP-CONH2	-0.0374598	\N	13	1	0	HU (DAPF)	Bait concentration was adjusted to fit the profile to WT	2023/01/17
BIN1	O00499	513-593	SH3	V583I	his6-MBP-TEVsite-SH3	PPP1R10	Q96QC0	712-726	PxxP_4	\N	GNEPPPPPPPFRGAR	Bio Ado Ado-GNEPPPPPPPFRGAR-CONH2	-0.0543703	\N	13	1	0	HU (DAPF)	Bait concentration was adjusted to fit the profile to WT	2023/01/17
BIN1	O00499	513-593	SH3	V583I	his6-MBP-TEVsite-SH3	PPP1R8	Q12972	97-111	PxxP_1	\N	GHIRLEPHKPQQIPI	Bio Ado Ado-GHIRLEPHKPQQIPI-CONH2	-0.0261411	\N	13	1	0	HU (DAPF)	Bait concentration was adjusted to fit the profile to WT	2023/01/17
BIN1	O00499	513-593	SH3	V583I	his6-MBP-TEVsite-SH3	PRC1	O43663	462-476	PxxP_1	\N	MLYGSAPRTPSKRRG	Bio Ado Ado-MLYGSAPRTPSKRRG-CONH2	0.0862624	\N	13	1	3.87274	HU (DAPF)	Bait concentration was adjusted to fit the profile to WT	2023/01/17
BIN1	O00499	513-593	SH3	V583I	his6-MBP-TEVsite-SH3	PRC1	O43663	473-487	PxxP_2	\N	KRRGLAPNTPGKARK	Bio Ado Ado-KRRGLAPNTPGKARK-CONH2	0.0108158	\N	13	1	0	HU (DAPF)	Bait concentration was adjusted to fit the profile to WT	2023/01/17
BIN1	O00499	513-593	SH3	V583I	his6-MBP-TEVsite-SH3	PRR12	Q9ULL5	1215-1229	PxxP_1	\N	GGTRLEPLKPLKIKL	Bio Ado Ado-GGTRLEPLKPLKIKL-CONH2	-0.0363715	0.0153395	13	2	0	HU (DAPF)	Bait concentration was adjusted to fit the profile to WT	2023/01/17
BIN1	O00499	513-593	SH3	V583I	his6-MBP-TEVsite-SH3	PRR12	Q9ULL5	13-27	PxxP_2	BAA86519.1	HPVRPPPPPPPPMPL	Bio Ado Ado-HPVRPPPPPPPPMPL-CONH2	0.00688713	\N	13	1	0	HU (DAPF)	Bait concentration was adjusted to fit the profile to WT	2023/01/17
BIN1	O00499	513-593	SH3	V583I	his6-MBP-TEVsite-SH3	PRR12	Q9ULL5	1300-1314	PxxP_3	\N	QAGLTPPLSPPKSVP	Bio Ado Ado-QAGLTPPLSPPKSVP-CONH2	-0.0316918	\N	13	1	0	HU (DAPF)	Bait concentration was adjusted to fit the profile to WT	2023/01/17
BIN1	O00499	513-593	SH3	V583I	his6-MBP-TEVsite-SH3	PRR12	Q9ULL5	1453-1467	PxxP_4	\N	LEEKPPPTPPPAPTP	Bio Ado Ado-LEEKPPPTPPPAPTP-CONH2	-0.0388788	\N	13	1	0	HU (DAPF)	Bait concentration was adjusted to fit the profile to WT	2023/01/17
BIN1	O00499	513-593	SH3	V583I	his6-MBP-TEVsite-SH3	PRR12	Q9ULL5	1664-1678	PxxP_5	\N	RKPWHRPPVPVRRSG	Bio Ado Ado-RKPWHRPPVPVRRSG-CONH2	0.582382	\N	13	1	5.11625	HU (DAPF)	Bait concentration was adjusted to fit the profile to WT	2023/01/17
BIN1	O00499	513-593	SH3	V583I	his6-MBP-TEVsite-SH3	PRR12	Q9ULL5	1691-1705	PxxP_6	\N	APPPKAPAPPPKPET	Bio Ado Ado-APPPKAPAPPPKPET-CONH2	-0.0154505	\N	13	1	0	HU (DAPF)	Bait concentration was adjusted to fit the profile to WT	2023/01/17
BIN1	O00499	513-593	SH3	V583I	his6-MBP-TEVsite-SH3	PRR12	Q9ULL5	1697-1711	PxxP_7	\N	PAPPPKPETPEKTTS	Bio Ado Ado-PAPPPKPETPEKTTS-CONH2	-0.0194468	\N	13	1	0	HU (DAPF)	Bait concentration was adjusted to fit the profile to WT	2023/01/17
BIN1	O00499	513-593	SH3	V583I	his6-MBP-TEVsite-SH3	PRR12	Q9ULL5	1720-1734	PxxP_8	\N	ETAMPEPPAPEKPSL	Bio Ado Ado-ETAMPEPPAPEKPSL-CONH2	-0.0311282	\N	13	1	0	HU (DAPF)	Bait concentration was adjusted to fit the profile to WT	2023/01/17
BIN1	O00499	513-593	SH3	V583I	his6-MBP-TEVsite-SH3	PRR12	Q9ULL5	1143-1157	PxxP_9	\N	CPPNPGPDGPRRRGR	Bio Ado Ado-CPPNPGPDGPRRRGR-CONH2	0.0600515	\N	13	1	3.69958	HU (DAPF)	Bait concentration was adjusted to fit the profile to WT	2023/01/17
BIN1	O00499	513-593	SH3	V583I	his6-MBP-TEVsite-SH3	PRR12	Q9ULL5	1161-1175	PxxP_10	\N	KAKRDGPPRPRGRPR	Bio Ado Ado-KAKRDGPPRPRGRPR-CONH2	0.167256	\N	13	1	4.21187	HU (DAPF)	Bait concentration was adjusted to fit the profile to WT	2023/01/17
BIN1	O00499	513-593	SH3	V583I	his6-MBP-TEVsite-SH3	PRR12	Q9ULL5	1309-1323	PxxP_11	\N	PPKSVPPSVPARGLQ	Bio Ado Ado-PPKSVPPSVPARGLQ-CONH2	0.0669654	\N	13	1	3.75105	HU (DAPF)	Bait concentration was adjusted to fit the profile to WT	2023/01/17
BIN1	O00499	513-593	SH3	V583I	his6-MBP-TEVsite-SH3	PRR12	Q9ULL5	5-19	PxxP_12	BAA86519.1	PGVPPGPPHPVRPPP	Bio Ado Ado-PGVPPGPPHPVRPPP-CONH2	-0.00305214	\N	13	1	0	HU (DAPF)	Bait concentration was adjusted to fit the profile to WT	2023/01/17
BIN1	O00499	513-593	SH3	V583I	his6-MBP-TEVsite-SH3	PRR12	Q9ULL5	986-1000	PxxP_13	\N	AYDPYGPYCPGRASG	Bio Ado Ado-AYDPYGPYCPGRASG-CONH2	-0.00462255	\N	13	1	0	HU (DAPF)	Bait concentration was adjusted to fit the profile to WT	2023/01/17
BIN1	O00499	513-593	SH3	V583I	his6-MBP-TEVsite-SH3	PRRC2A	P48634	907-921	PxxP_18	\N	GSGGQGPPPPRRESR	Bio E E Ado Ado-GSGGQGPPPPRRESR-CONH2	0.00758853	\N	13	1	0	HU (DAPF)	Bait concentration was adjusted to fit the profile to WT	2023/01/17
BIN1	O00499	513-593	SH3	V583I	his6-MBP-TEVsite-SH3	PRRC2B	Q5JSZ5	251-265	PxxP_1	\N	KDPSLRPAQPVRKGA	Bio Ado Ado-KDPSLRPAQPVRKGA-CONH2	-0.0297793	\N	13	1	0	HU (DAPF)	Bait concentration was adjusted to fit the profile to WT	2023/01/17
BIN1	O00499	513-593	SH3	V583I	his6-MBP-TEVsite-SH3	PRRC2B	Q5JSZ5	306-320	PxxP_2	\N	PQLRLEPRVPFRQFQ	Bio Ado Ado-PQLRLEPRVPFRQFQ-CONH2	0.043861	0.0187175	13	2	0	HU (DAPF)	Bait concentration was adjusted to fit the profile to WT	2023/01/17
BIN1	O00499	513-593	SH3	V583I	his6-MBP-TEVsite-SH3	PRRC2B	Q5JSZ5	330-344	PxxP_3	\N	RLGLSRPLRPLRQLV	Bio Ado Ado-RLGLSRPLRPLRQLV-CONH2	0.0829518	\N	13	1	3.85372	HU (DAPF)	Bait concentration was adjusted to fit the profile to WT	2023/01/17
BIN1	O00499	513-593	SH3	V583I	his6-MBP-TEVsite-SH3	PRRC2B	Q5JSZ5	445-459	PxxP_4	\N	VRKAPDPQPPPRKLH	Bio Ado Ado-VRKAPDPQPPPRKLH-CONH2	0.318833	\N	13	1	4.60121	HU (DAPF)	Bait concentration was adjusted to fit the profile to WT	2023/01/17
BIN1	O00499	513-593	SH3	V583I	his6-MBP-TEVsite-SH3	PRRC2B	Q5JSZ5	548-562	PxxP_5	\N	QAEKEVPWSPSAEKA	Bio Ado Ado-QAEKEVPWSPSAEKA-CONH2	-0.0519833	\N	13	1	0	HU (DAPF)	Bait concentration was adjusted to fit the profile to WT	2023/01/17
BIN1	O00499	513-593	SH3	V583I	his6-MBP-TEVsite-SH3	PRRC2B	Q5JSZ5	570-584	PxxP_6	\N	AVHKGSPEFPAQETP	Bio Ado Ado-AVHKGSPEFPAQETP-CONH2	0.0110346	\N	13	1	0	HU (DAPF)	Bait concentration was adjusted to fit the profile to WT	2023/01/17
BIN1	O00499	513-593	SH3	V583I	his6-MBP-TEVsite-SH3	PRRC2B	Q5JSZ5	647-661	PxxP_7	\N	QPVYPPPSHPQRTFY	Bio Ado Ado-QPVYPPPSHPQRTFY-CONH2	0.0211725	\N	13	1	0	HU (DAPF)	Bait concentration was adjusted to fit the profile to WT	2023/01/17
BIN1	O00499	513-593	SH3	V583I	his6-MBP-TEVsite-SH3	PRRC2B	Q5JSZ5	848-862	PxxP_8	\N	QNLRCSPLEPDFVPD	Bio Ado Ado-QNLRCSPLEPDFVPD-CONH2	0.00353749	\N	13	1	0	HU (DAPF)	Bait concentration was adjusted to fit the profile to WT	2023/01/17
BIN1	O00499	513-593	SH3	V583I	his6-MBP-TEVsite-SH3	PRRC2C	Q9Y520	1419-1433	PxxP_3	\N	RPRRQRPTRPPRQDK	Bio E E Ado Ado-RPRRQRPTRPPRQDK-CONH2	0.415492	\N	13	1	4.79723	HU (DAPF)	Bait concentration was adjusted to fit the profile to WT	2023/01/17
BIN1	O00499	513-593	SH3	V583I	his6-MBP-TEVsite-SH3	PTK2B	Q14289	708-722	PxxP_1	\N	TAFQEPPPKPSRPKY	Bio Ado Ado-TAFQEPPPKPSRPKY-CONH2	0.0450746	\N	13	1	0	HU (DAPF)	Bait concentration was adjusted to fit the profile to WT	2023/01/17
BIN1	O00499	513-593	SH3	V583I	his6-MBP-TEVsite-SH3	PTK2B	Q14289	834-848	PxxP_2	\N	YMNDKSPLTPEKEVG	Bio Ado Ado-YMNDKSPLTPEKEVG-CONH2	0.0292727	\N	13	1	0	HU (DAPF)	Bait concentration was adjusted to fit the profile to WT	2023/01/17
BIN1	O00499	513-593	SH3	V583I	his6-MBP-TEVsite-SH3	PTK2B	Q14289	850-864	PxxP_3	\N	LEFTGPPQKPPRLGA	Bio Ado Ado-LEFTGPPQKPPRLGA-CONH2	0.0924156	\N	13	1	3.90644	HU (DAPF)	Bait concentration was adjusted to fit the profile to WT	2023/01/17
BIN1	O00499	513-593	SH3	V583I	his6-MBP-TEVsite-SH3	RACGAP1	Q9H0H5	188-202	PxxP_1	\N	RQFVDGPPGPVKKTR	Bio Ado Ado-RQFVDGPPGPVKKTR-CONH2	-0.00132778	\N	13	1	0	HU (DAPF)	Bait concentration was adjusted to fit the profile to WT	2023/01/17
BIN1	O00499	513-593	SH3	V583I	his6-MBP-TEVsite-SH3	RASAL3	Q86YV0	91-105	PxxP_1	\N	GRHKNPPPEPDPEPE	Bio Ado Ado-GRHKNPPPEPDPEPE-CONH2	-0.0149811	\N	13	1	0	HU (DAPF)	Bait concentration was adjusted to fit the profile to WT	2023/01/17
BIN1	O00499	513-593	SH3	V583I	his6-MBP-TEVsite-SH3	RAVER1	Q8IY67	420-434	PxxP_1	\N	AGGGLPPELPPRRGK	Bio Ado Ado-AGGGLPPELPPRRGK-CONH2	0.403858	\N	13	1	4.77456	HU (DAPF)	Bait concentration was adjusted to fit the profile to WT	2023/01/17
BIN1	O00499	513-593	SH3	V583I	his6-MBP-TEVsite-SH3	RAVER1	Q8IY67	431-445	PxxP_2	\N	RRGKPPPLLPSVLGP	Bio Ado Ado-RRGKPPPLLPSVLGP-CONH2	0.055863	\N	13	1	3.66568	HU (DAPF)	Bait concentration was adjusted to fit the profile to WT	2023/01/17
BIN1	O00499	513-593	SH3	V583I	his6-MBP-TEVsite-SH3	RBBP6	Q7Z6E9	331-345	PxxP_1	\N	RLRKQLPPPPPPIPP	Bio Ado Ado-RLRKQLPPPPPPIPP-CONH2	0.0147055	\N	13	1	0	HU (DAPF)	Bait concentration was adjusted to fit the profile to WT	2023/01/17
BIN1	O00499	513-593	SH3	V583I	his6-MBP-TEVsite-SH3	RBBP6	Q7Z6E9	336-350	PxxP_2	\N	LPPPPPPIPPPRPLI	Bio Ado Ado-LPPPPPPIPPPRPLI-CONH2	-0.0324375	\N	13	1	0	HU (DAPF)	Bait concentration was adjusted to fit the profile to WT	2023/01/17
BIN1	O00499	513-593	SH3	V583I	his6-MBP-TEVsite-SH3	RBBP6	Q7Z6E9	725-739	PxxP_3	\N	RSYSRSPPYPRRGRG	Bio Ado Ado-RSYSRSPPYPRRGRG-CONH2	0.249935	\N	13	1	4.44354	HU (DAPF)	Bait concentration was adjusted to fit the profile to WT	2023/01/17
BIN1	O00499	513-593	SH3	V583I	his6-MBP-TEVsite-SH3	RBM15	Q96T37	311-325	PxxP_1	\N	ALGRLPPPPPPPLPR	Bio Ado Ado-ALGRLPPPPPPPLPR-CONH2	0.07596	\N	13	1	3.81122	HU (DAPF)	Bait concentration was adjusted to fit the profile to WT	2023/01/17
BIN1	O00499	513-593	SH3	V583I	his6-MBP-TEVsite-SH3	RBM15	Q96T37	583-597	PxxP_2	\N	DSDWVPPPPPVRERS	Bio Ado Ado-DSDWVPPPPPVRERS-CONH2	-0.0307544	\N	13	1	0	HU (DAPF)	Bait concentration was adjusted to fit the profile to WT	2023/01/17
BIN1	O00499	513-593	SH3	V583I	his6-MBP-TEVsite-SH3	RBM15B	Q8NDT2	108-122	PxxP_1	\N	MSPRASPLPPPPPPP	Bio Ado Ado-MSPRASPLPPPPPPP-CONH2	0.00690039	\N	13	1	0	HU (DAPF)	Bait concentration was adjusted to fit the profile to WT	2023/01/17
BIN1	O00499	513-593	SH3	V583I	his6-MBP-TEVsite-SH3	RBM33	Q96EV2	477-491	PxxP_1	\N	LEQRSPPPPPPPPTL	Bio Ado Ado-LEQRSPPPPPPPPTL-CONH2	-0.0269614	\N	13	1	0	HU (DAPF)	Bait concentration was adjusted to fit the profile to WT	2023/01/17
BIN1	O00499	513-593	SH3	V583I	his6-MBP-TEVsite-SH3	RBM33	Q96EV2	521-535	PxxP_2	\N	VFPRERPVRPALQPP	Bio Ado Ado-VFPRERPVRPALQPP-CONH2	0.0315646	\N	13	1	0	HU (DAPF)	Bait concentration was adjusted to fit the profile to WT	2023/01/17
BIN1	O00499	513-593	SH3	V583I	his6-MBP-TEVsite-SH3	RBM33	Q96EV2	547-561	PxxP_3	\N	GSATTRPFIPPRQPF	Bio Ado Ado-GSATTRPFIPPRQPF-CONH2	0.0619948	\N	13	1	3.71457	HU (DAPF)	Bait concentration was adjusted to fit the profile to WT	2023/01/17
BIN1	O00499	513-593	SH3	V583I	his6-MBP-TEVsite-SH3	RBM33	Q96EV2	706-720	PxxP_4	\N	SNLRELPIAPSHVIE	Bio Ado Ado-SNLRELPIAPSHVIE-CONH2	0.00147142	\N	13	1	0	HU (DAPF)	Bait concentration was adjusted to fit the profile to WT	2023/01/17
BIN1	O00499	513-593	SH3	V583I	his6-MBP-TEVsite-SH3	RBM33	Q96EV2	757-771	PxxP_5	\N	TEVKVKPASPVAQPK	Bio Ado Ado-TEVKVKPASPVAQPK-CONH2	0.00912656	\N	13	1	0	HU (DAPF)	Bait concentration was adjusted to fit the profile to WT	2023/01/17
BIN1	O00499	513-593	SH3	V583I	his6-MBP-TEVsite-SH3	RBM33	Q96EV2	926-940	PxxP_6	\N	PLHKVLPIKPADVEE	Bio Ado Ado-PLHKVLPIKPADVEE-CONH2	-0.00942938	\N	13	1	0	HU (DAPF)	Bait concentration was adjusted to fit the profile to WT	2023/01/17
BIN1	O00499	513-593	SH3	V583I	his6-MBP-TEVsite-SH3	RBMX	P38159	161-175	PxxP_1	\N	PPKRSAPSGPVRSSS	Bio Ado Ado-PPKRSAPSGPVRSSS-CONH2	-0.021074	0.0076294	13	2	0	HU (DAPF)	Bait concentration was adjusted to fit the profile to WT	2023/01/17
BIN1	O00499	513-593	SH3	V583I	his6-MBP-TEVsite-SH3	RBMX	P38159	90-104	PxxP_2	\N	ESGRRGPPPPPRSRG	Bio Ado Ado-ESGRRGPPPPPRSRG-CONH2	0.283969	0.00814453	13	2	4.5241	HU (DAPF)	Bait concentration was adjusted to fit the profile to WT	2023/01/17
BIN1	O00499	513-593	SH3	V583I	his6-MBP-TEVsite-SH3	RBMX	P38159	91-105	PxxP_3	\N	SGRRGPPPPPRSRGP	Bio Ado Ado-SGRRGPPPPPRSRGP-CONH2	0.283298	\N	13	1	4.52257	HU (DAPF)	Bait concentration was adjusted to fit the profile to WT	2023/01/17
BIN1	O00499	513-593	SH3	V583I	his6-MBP-TEVsite-SH3	REEP4	Q9H6H4	202-216	PxxP_1	\N	SDTEAVPRAPARPRE	Bio Ado Ado-SDTEAVPRAPARPRE-CONH2	0.0267091	\N	13	1	0	HU (DAPF)	Bait concentration was adjusted to fit the profile to WT	2023/01/17
BIN1	O00499	513-593	SH3	V583I	his6-MBP-TEVsite-SH3	RNF25	Q96BH1	333-347	PxxP_1	\N	QKAMLDPPKPSRGPW	Bio Ado Ado-QKAMLDPPKPSRGPW-CONH2	-0.000784309	\N	13	1	0	HU (DAPF)	Bait concentration was adjusted to fit the profile to WT	2023/01/17
BIN1	O00499	513-593	SH3	V583I	his6-MBP-TEVsite-SH3	RNF25	Q96BH1	369-383	PxxP_2	\N	TQELPPPEGPLKEPM	Bio Ado Ado-TQELPPPEGPLKEPM-CONH2	-0.00427287	\N	13	1	0	HU (DAPF)	Bait concentration was adjusted to fit the profile to WT	2023/01/17
BIN1	O00499	513-593	SH3	V583I	his6-MBP-TEVsite-SH3	RNPS1	Q15287	237-251	PxxP_1	\N	AVLAPWPRPPPRRFS	Bio Ado Ado-AVLAPWPRPPPRRFS-CONH2	0.587045	\N	13	1	5.12534	HU (DAPF)	Bait concentration was adjusted to fit the profile to WT	2023/01/17
BIN1	O00499	513-593	SH3	V583I	his6-MBP-TEVsite-SH3	RNPS1	Q15287	252-266	PxxP_2	\N	PPRRMLPPPPMWRRS	Bio Ado Ado-PPRRMLPPPPMWRRS-CONH2	0.268062	\N	13	1	4.4872	HU (DAPF)	Bait concentration was adjusted to fit the profile to WT	2023/01/17
BIN1	O00499	513-593	SH3	V583I	his6-MBP-TEVsite-SH3	RPS6KA5	O75582	270-284	PxxP_1	\N	RILKSEPPYPQEMSA	Bio Ado Ado-RILKSEPPYPQEMSA-CONH2	-0.0240144	\N	13	1	0	HU (DAPF)	Bait concentration was adjusted to fit the profile to WT	2023/01/17
BIN1	O00499	513-593	SH3	V583I	his6-MBP-TEVsite-SH3	RSPRY1	Q96DX4	71-85	PxxP_1	\N	ADTRSQPRDPVRPPR	Bio Ado Ado-ADTRSQPRDPVRPPR-CONH2	0.0876133	0.0355075	13	2	3.88032	HU (DAPF)	Bait concentration was adjusted to fit the profile to WT	2023/01/17
BIN1	O00499	513-593	SH3	V583I	his6-MBP-TEVsite-SH3	RSPRY1	Q96DX4	74-88	PxxP_2	\N	RSQPRDPVRPPRRGR	Bio Ado Ado-RSQPRDPVRPPRRGR-CONH2	0.656688	\N	13	1	5.26575	HU (DAPF)	Bait concentration was adjusted to fit the profile to WT	2023/01/17
BIN1	O00499	513-593	SH3	V583I	his6-MBP-TEVsite-SH3	RSPRY1	Q96DX4	84-98	PxxP_3	\N	PRRGRGPHEPRRKKQ	Bio Ado Ado-PRRGRGPHEPRRKKQ-CONH2	0.0343275	\N	13	1	0	HU (DAPF)	Bait concentration was adjusted to fit the profile to WT	2023/01/17
BIN1	O00499	513-593	SH3	V583I	his6-MBP-TEVsite-SH3	RUNX1	Q01196	167-181	PxxP_4	\N	KITVDGPREPRRHRQ	Bio Ado Ado-KITVDGPREPRRHRQ-CONH2	-0.00615382	\N	13	1	0	HU (DAPF)	Bait concentration was adjusted to fit the profile to WT	2023/01/17
BIN1	O00499	513-593	SH3	V583I	his6-MBP-TEVsite-SH3	RUNX1	Q01196	207-221	PxxP_5	\N	TAMRVSPHHPAPTPN	Bio Ado Ado-TAMRVSPHHPAPTPN-CONH2	0.0114095	\N	13	1	0	HU (DAPF)	Bait concentration was adjusted to fit the profile to WT	2023/01/17
BIN1	O00499	513-593	SH3	V583I	his6-MBP-TEVsite-SH3	RUNX1	Q01196	268-282	PxxP_6	\N	SVHPATPISPGRASG	Bio Ado Ado-SVHPATPISPGRASG-CONH2	-0.0226247	\N	13	1	0	HU (DAPF)	Bait concentration was adjusted to fit the profile to WT	2023/01/17
BIN1	O00499	513-593	SH3	V583I	his6-MBP-TEVsite-SH3	RUNX1	Q01196	304-318	PxxP_7	\N	SDPRQFPALPSISDP	Bio Ado Ado-SDPRQFPALPSISDP-CONH2	0.0188203	\N	13	1	0	HU (DAPF)	Bait concentration was adjusted to fit the profile to WT	2023/01/17
BIN1	O00499	513-593	SH3	V583I	his6-MBP-TEVsite-SH3	RXRB	P28702	3-17	PxxP_1	\N	WAARPPFLPQRHAAG	Bio Ado Ado-WAARPPFLPQRHAAG-CONH2	0.00266834	\N	13	1	0	HU (DAPF)	Bait concentration was adjusted to fit the profile to WT	2023/01/17
BIN1	O00499	513-593	SH3	V583I	his6-MBP-TEVsite-SH3	SAMD1	Q6SPF0	102-116	PxxP_1	\N	PRRGATPPAPPRAPR	Bio Ado Ado-PRRGATPPAPPRAPR-CONH2	0.238898	\N	13	1	4.41598	HU (DAPF)	Bait concentration was adjusted to fit the profile to WT	2023/01/17
BIN1	O00499	513-593	SH3	V583I	his6-MBP-TEVsite-SH3	SAMD1	Q6SPF0	187-201	PxxP_2	\N	PPAVAPPAGPRRAPP	Bio Ado Ado-PPAVAPPAGPRRAPP-CONH2	-0.0219908	\N	13	1	0	HU (DAPF)	Bait concentration was adjusted to fit the profile to WT	2023/01/17
BIN1	O00499	513-593	SH3	V583I	his6-MBP-TEVsite-SH3	SAMD1	Q6SPF0	204-218	PxxP_3	\N	VAAREPPLPPPPQPP	Bio Ado Ado-VAAREPPLPPPPQPP-CONH2	-0.0231811	\N	13	1	0	HU (DAPF)	Bait concentration was adjusted to fit the profile to WT	2023/01/17
BIN1	O00499	513-593	SH3	V583I	his6-MBP-TEVsite-SH3	SAMD1	Q6SPF0	424-438	PxxP_4	\N	DSPSPVPLPPGKPAL	Bio Ado Ado-DSPSPVPLPPGKPAL-CONH2	0.00769505	\N	13	1	0	HU (DAPF)	Bait concentration was adjusted to fit the profile to WT	2023/01/17
BIN1	O00499	513-593	SH3	V583I	his6-MBP-TEVsite-SH3	SAMD1	Q6SPF0	450-464	PxxP_5	\N	PGRKEKPSDPVEWTV	Bio Ado Ado-PGRKEKPSDPVEWTV-CONH2	0.00252325	\N	13	1	0	HU (DAPF)	Bait concentration was adjusted to fit the profile to WT	2023/01/17
BIN1	O00499	513-593	SH3	V583I	his6-MBP-TEVsite-SH3	SBF1	O95248	1029-1043	PxxP_1	\N	LGSAHTPGRPPRVTK	Bio Ado Ado-LGSAHTPGRPPRVTK-CONH2	0.0452205	\N	13	1	0	HU (DAPF)	Bait concentration was adjusted to fit the profile to WT	2023/01/17
BIN1	O00499	513-593	SH3	V583I	his6-MBP-TEVsite-SH3	SCML2	Q9UQR0	158-172	PxxP_1	\N	TLFKKEPPKPPLNNF	Bio Ado Ado-TLFKKEPPKPPLNNF-CONH2	0.0188231	\N	13	1	0	HU (DAPF)	Bait concentration was adjusted to fit the profile to WT	2023/01/17
BIN1	O00499	513-593	SH3	V583I	his6-MBP-TEVsite-SH3	SCML2	Q9UQR0	159-173	PxxP_2	\N	LFKKEPPKPPLNNFK	Bio Ado Ado-LFKKEPPKPPLNNFK-CONH2	0.0273931	\N	13	1	0	HU (DAPF)	Bait concentration was adjusted to fit the profile to WT	2023/01/17
BIN1	O00499	513-593	SH3	V583I	his6-MBP-TEVsite-SH3	SCML2	Q9UQR0	282-296	PxxP_3	\N	RSSRIKPPGPTAVPK	Bio Ado Ado-RSSRIKPPGPTAVPK-CONH2	0.0149164	\N	13	1	0	HU (DAPF)	Bait concentration was adjusted to fit the profile to WT	2023/01/17
BIN1	O00499	513-593	SH3	V583I	his6-MBP-TEVsite-SH3	SH3KBP1	Q96B97	390-404	PxxP_2	\N	LQKPSVPAIPPKKPR	Bio E E Ado Ado-LQKPSVPAIPPKKPR-CONH2	0.0159212	\N	13	1	0	HU (DAPF)	Bait concentration was adjusted to fit the profile to WT	2023/01/17
BIN1	O00499	513-593	SH3	V583I	his6-MBP-TEVsite-SH3	SHKBP1	Q8TBC3	642-656	PxxP_1	\N	SGHRGSPSPPQAEAR	Bio Ado Ado-SGHRGSPSPPQAEAR-CONH2	0.0260136	\N	13	1	0	HU (DAPF)	Bait concentration was adjusted to fit the profile to WT	2023/01/17
BIN1	O00499	513-593	SH3	V583I	his6-MBP-TEVsite-SH3	SHKBP1	Q8TBC3	688-702	PxxP_2	\N	SSGLGTPLTPPKMKL	Bio Ado Ado-SSGLGTPLTPPKMKL-CONH2	-0.00636675	\N	13	1	0	HU (DAPF)	Bait concentration was adjusted to fit the profile to WT	2023/01/17
BIN1	O00499	513-593	SH3	V583I	his6-MBP-TEVsite-SH3	SMC5	Q8IY18	15-29	PxxP_1	\N	PSKRALPRDPSSEVP	Bio Ado Ado-PSKRALPRDPSSEVP-CONH2	-0.0453344	\N	13	1	0	HU (DAPF)	Bait concentration was adjusted to fit the profile to WT	2023/01/17
BIN1	O00499	513-593	SH3	V583I	his6-MBP-TEVsite-SH3	SMCHD1	A6NHR9	1977-1991	PxxP_2	\N	VETTDCPVPPKRMRR	Bio E E Ado Ado-VETTDCPVPPKRMRR-CONH2	0.367154	\N	13	1	4.70167	HU (DAPF)	Bait concentration was adjusted to fit the profile to WT	2023/01/17
BIN1	O00499	513-593	SH3	V583I	his6-MBP-TEVsite-SH3	SPAST	Q9UBP0	36-50	PxxP_1	\N	AGPAPPPESPHKRNL	Bio Ado Ado-AGPAPPPESPHKRNL-CONH2	-0.0223225	\N	13	1	0	HU (DAPF)	Bait concentration was adjusted to fit the profile to WT	2023/01/17
BIN1	O00499	513-593	SH3	V583I	his6-MBP-TEVsite-SH3	SRRM1	Q8IYB3	576-590	PxxP_7	\N	PPRRRTPSPPPRRRS	Bio E E Ado Ado-PPRRRTPSPPPRRRS-CONH2	0.468705	\N	13	1	4.89926	HU (DAPF)	Bait concentration was adjusted to fit the profile to WT	2023/01/17
BIN1	O00499	513-593	SH3	V583I	his6-MBP-TEVsite-SH3	SYNJ1	O43426	1056-1070	PxxP_1	\N	ISEGPVPSLPIRPSR	Bio Ado Ado-ISEGPVPSLPIRPSR-CONH2	0.170803	\N	13	1	4.22334	HU (DAPF)	Bait concentration was adjusted to fit the profile to WT	2023/01/17
BIN1	O00499	513-593	SH3	V583I	his6-MBP-TEVsite-SH3	SYNJ1	O43426	1059-1073	PxxP_2	\N	GPVPSLPIRPSRAPS	Bio Ado Ado-GPVPSLPIRPSRAPS-CONH2	0.0540621	\N	13	1	3.65037	HU (DAPF)	Bait concentration was adjusted to fit the profile to WT	2023/01/17
BIN1	O00499	513-593	SH3	V583I	his6-MBP-TEVsite-SH3	SYNJ1	O43426	1096-1110	PxxP_3	\N	QKDPAQPLEPKRPPP	Bio Ado Ado-QKDPAQPLEPKRPPP-CONH2	-0.059601	\N	13	1	0	HU (DAPF)	Bait concentration was adjusted to fit the profile to WT	2023/01/17
BIN1	O00499	513-593	SH3	V583I	his6-MBP-TEVsite-SH3	SYNJ1	O43426	1104-1118	PxxP_4	\N	EPKRPPPPRPVAPPT	Bio Ado Ado-EPKRPPPPRPVAPPT-CONH2	-0.00997008	\N	13	1	0	HU (DAPF)	Bait concentration was adjusted to fit the profile to WT	2023/01/17
BIN1	O00499	513-593	SH3	V583I	his6-MBP-TEVsite-SH3	SYNJ1	O43426	1114-1128	PxxP_5	\N	VAPPTRPAPPQRPPP	Bio Ado Ado-VAPPTRPAPPQRPPP-CONH2	-0.0266268	\N	13	1	0	HU (DAPF)	Bait concentration was adjusted to fit the profile to WT	2023/01/17
BIN1	O00499	513-593	SH3	V583I	his6-MBP-TEVsite-SH3	SYNJ1	O43426	1190-1204	PxxP_6	\N	GYSTARPTIPPRAGV	Bio Ado Ado-GYSTARPTIPPRAGV-CONH2	0.173355	\N	13	1	4.23148	HU (DAPF)	Bait concentration was adjusted to fit the profile to WT	2023/01/17
BIN1	O00499	513-593	SH3	V583I	his6-MBP-TEVsite-SH3	SYNJ1	O43426	1278-1292	PxxP_7	\N	PNLETPPQPPPRSRS	Bio Ado Ado-PNLETPPQPPPRSRS-CONH2	0.574999	\N	13	1	5.10189	HU (DAPF)	Bait concentration was adjusted to fit the profile to WT	2023/01/17
BIN1	O00499	513-593	SH3	V583I	his6-MBP-TEVsite-SH3	SYNJ1	O43426	1371-1385	PxxP_8	\N	SCMPTMPPIPARSQS	Bio Ado Ado-SCMPTMPPIPARSQS-CONH2	0.097791	\N	13	1	3.93432	HU (DAPF)	Bait concentration was adjusted to fit the profile to WT	2023/01/17
BIN1	O00499	513-593	SH3	V583I	his6-MBP-TEVsite-SH3	SYNJ1	O43426	1407-1421	PxxP_9	\N	SDRTAAPGNPFRAKS	Bio Ado Ado-SDRTAAPGNPFRAKS-CONH2	0.0145153	\N	13	1	0	HU (DAPF)	Bait concentration was adjusted to fit the profile to WT	2023/01/17
BIN1	O00499	513-593	SH3	V583I	his6-MBP-TEVsite-SH3	SYNJ1	O43426	1533-1547	PxxP_10	\N	LPSRRPPPPPVPLLP	Bio Ado Ado-LPSRRPPPPPVPLLP-CONH2	-0.0755336	\N	13	1	0	HU (DAPF)	Bait concentration was adjusted to fit the profile to WT	2023/01/17
BIN1	O00499	513-593	SH3	V583I	his6-MBP-TEVsite-SH3	SYNJ2	O15056	1098-1112	PxxP_1	\N	VPNRPRPPQPPQRPP	Bio Ado Ado-VPNRPRPPQPPQRPP-CONH2	-0.0138881	\N	13	1	0	HU (DAPF)	Bait concentration was adjusted to fit the profile to WT	2023/01/17
BIN1	O00499	513-593	SH3	V583I	his6-MBP-TEVsite-SH3	SYNJ2	O15056	1099-1113	PxxP_2	\N	PNRPRPPQPPQRPPP	Bio Ado Ado-PNRPRPPQPPQRPPP-CONH2	-0.00327415	\N	13	1	0	HU (DAPF)	Bait concentration was adjusted to fit the profile to WT	2023/01/17
BIN1	O00499	513-593	SH3	V583I	his6-MBP-TEVsite-SH3	SYNJ2	O15056	1140-1154	PxxP_3	\N	QTARLLPGAPQQPPK	Bio Ado Ado-QTARLLPGAPQQPPK-CONH2	0.0167379	\N	13	1	0	HU (DAPF)	Bait concentration was adjusted to fit the profile to WT	2023/01/17
BIN1	O00499	513-593	SH3	V583I	his6-MBP-TEVsite-SH3	SYNJ2	O15056	1143-1157	PxxP_4	\N	RLLPGAPQQPPKART	Bio Ado Ado-RLLPGAPQQPPKART-CONH2	0.0186831	\N	13	1	0	HU (DAPF)	Bait concentration was adjusted to fit the profile to WT	2023/01/17
BIN1	O00499	513-593	SH3	V583I	his6-MBP-TEVsite-SH3	SYNJ2	O15056	1219-1233	PxxP_5	\N	ETPQAPPLLPRRPPP	Bio Ado Ado-ETPQAPPLLPRRPPP-CONH2	-0.0139768	\N	13	1	0	HU (DAPF)	Bait concentration was adjusted to fit the profile to WT	2023/01/17
BIN1	O00499	513-593	SH3	V583I	his6-MBP-TEVsite-SH3	SYNJ2	O15056	1227-1241	PxxP_6	\N	LPRRPPPRVPAIKKP	Bio Ado Ado-LPRRPPPRVPAIKKP-CONH2	0.253694	\N	13	1	4.45275	HU (DAPF)	Bait concentration was adjusted to fit the profile to WT	2023/01/17
BIN1	O00499	513-593	SH3	V583I	his6-MBP-TEVsite-SH3	SYNJ2	O15056	1324-1338	PxxP_7	\N	EAPPLVPKVPPRRKK	Bio Ado Ado-EAPPLVPKVPPRRKK-CONH2	0.786815	\N	13	1	5.57356	HU (DAPF)	Bait concentration was adjusted to fit the profile to WT	2023/01/17
BIN1	O00499	513-593	SH3	V583I	his6-MBP-TEVsite-SH3	SYNJ2	O15056	1442-1456	PxxP_8	\N	RSPKRDPIDPVSAGA	Bio Ado Ado-RSPKRDPIDPVSAGA-CONH2	-0.0102432	\N	13	1	0	HU (DAPF)	Bait concentration was adjusted to fit the profile to WT	2023/01/17
BIN1	O00499	513-593	SH3	V583I	his6-MBP-TEVsite-SH3	TBC1D10B	Q4KMP7	15-29	PxxP_1	\N	HGAPAAPSPPPRGSR	Bio Ado Ado-HGAPAAPSPPPRGSR-CONH2	0.493095	\N	13	1	4.94552	HU (DAPF)	Bait concentration was adjusted to fit the profile to WT	2023/01/17
BIN1	O00499	513-593	SH3	V583I	his6-MBP-TEVsite-SH3	TBC1D10B	Q4KMP7	673-687	PxxP_2	\N	AGGAPSPPPPVRRAS	Bio Ado Ado-AGGAPSPPPPVRRAS-CONH2	0.031318	\N	13	1	0	HU (DAPF)	Bait concentration was adjusted to fit the profile to WT	2023/01/17
BIN1	O00499	513-593	SH3	V583I	his6-MBP-TEVsite-SH3	TBC1D9B	Q66K14	261-275	PxxP_1	\N	DKALPRPIRPHRNIS	Bio Ado Ado-DKALPRPIRPHRNIS-CONH2	0.219122	\N	13	1	4.36447	HU (DAPF)	Bait concentration was adjusted to fit the profile to WT	2023/01/17
BIN1	O00499	513-593	SH3	V583I	his6-MBP-TEVsite-SH3	TBC1D9B	Q66K14	556-570	PxxP_2	\N	DLHRSMPEHPAFQNE	Bio Ado Ado-DLHRSMPEHPAFQNE-CONH2	-0.0277487	\N	13	1	0	HU (DAPF)	Bait concentration was adjusted to fit the profile to WT	2023/01/17
BIN1	O00499	513-593	SH3	V583I	his6-MBP-TEVsite-SH3	TIPIN	Q9BVW5	23-37	PxxP_1	\N	FPPFPPPASPERQDG	Bio Ado Ado-FPPFPPPASPERQDG-CONH2	0.00369853	\N	13	1	0	HU (DAPF)	Bait concentration was adjusted to fit the profile to WT	2023/01/17
BIN1	O00499	513-593	SH3	V583I	his6-MBP-TEVsite-SH3	TMEM237	Q96Q45	15-29	PxxP_1	\N	RPPRALPPVPSQDDI	Bio Ado Ado-RPPRALPPVPSQDDI-CONH2	-0.090454	\N	13	1	0	HU (DAPF)	Bait concentration was adjusted to fit the profile to WT	2023/01/17
BIN1	O00499	513-593	SH3	V583I	his6-MBP-TEVsite-SH3	TMEM237	Q96Q45	70-84	PxxP_2	\N	KELKEHPEAPVQRRQ	Bio Ado Ado-KELKEHPEAPVQRRQ-CONH2	0.0143995	\N	13	1	0	HU (DAPF)	Bait concentration was adjusted to fit the profile to WT	2023/01/17
BIN1	O00499	513-593	SH3	V583I	his6-MBP-TEVsite-SH3	TPX2	Q9ULW0	108-122	PxxP_1	\N	AISRKTPAQPQRRSL	Bio Ado Ado-AISRKTPAQPQRRSL-CONH2	-0.000523574	0.00886256	13	2	0	HU (DAPF)	Bait concentration was adjusted to fit the profile to WT	2023/01/17
BIN1	O00499	513-593	SH3	V583I	his6-MBP-TEVsite-SH3	TPX2	Q9ULW0	285-299	PxxP_2	\N	SELRKHPSSPARVTK	Bio Ado Ado-SELRKHPSSPARVTK-CONH2	-0.0116818	0.00701568	13	2	0	HU (DAPF)	Bait concentration was adjusted to fit the profile to WT	2023/01/17
BIN1	O00499	513-593	SH3	V583I	his6-MBP-TEVsite-SH3	TPX2	Q9ULW0	410-424	PxxP_3	\N	RILEGGPILPKKPPV	Bio Ado Ado-RILEGGPILPKKPPV-CONH2	-0.00107145	\N	13	1	0	HU (DAPF)	Bait concentration was adjusted to fit the profile to WT	2023/01/17
BIN1	O00499	513-593	SH3	V583I	his6-MBP-TEVsite-SH3	TPX2	Q9ULW0	417-431	PxxP_4	\N	ILPKKPPVKPPTEPI	Bio Ado Ado-ILPKKPPVKPPTEPI-CONH2	-0.0186789	\N	13	1	0	HU (DAPF)	Bait concentration was adjusted to fit the profile to WT	2023/01/17
BIN1	O00499	513-593	SH3	V583I	his6-MBP-TEVsite-SH3	TPX2	Q9ULW0	631-645	PxxP_5	\N	TVISQEPFVPKKEKK	Bio Ado Ado-TVISQEPFVPKKEKK-CONH2	-0.00446796	\N	13	1	0	HU (DAPF)	Bait concentration was adjusted to fit the profile to WT	2023/01/17
BIN1	O00499	513-593	SH3	V583I	his6-MBP-TEVsite-SH3	UNC119	Q13432	53-67	PxxP_1	\N	PLQRKQPIGPEDVLG	Bio Ado Ado-PLQRKQPIGPEDVLG-CONH2	0.0157634	\N	13	1	0	HU (DAPF)	Bait concentration was adjusted to fit the profile to WT	2023/01/17
BIN1	O00499	513-593	SH3	V583I	his6-MBP-TEVsite-SH3	WAS	P42768	154-168	PxxP_1	\N	GDRRQLPPPPTPANE	Bio Ado Ado-GDRRQLPPPPTPANE-CONH2	-0.0353917	\N	13	1	0	HU (DAPF)	Bait concentration was adjusted to fit the profile to WT	2023/01/17
BIN1	O00499	513-593	SH3	V583I	his6-MBP-TEVsite-SH3	WAS	P42768	306-320	PxxP_2	\N	EMRRQEPLPPPPPPS	Bio Ado Ado-EMRRQEPLPPPPPPS-CONH2	-0.0047019	\N	13	1	0	HU (DAPF)	Bait concentration was adjusted to fit the profile to WT	2023/01/17
BIN1	O00499	513-593	SH3	V583I	his6-MBP-TEVsite-SH3	WAS	P42768	310-324	PxxP_3	\N	QEPLPPPPPPSRGGN	Bio Ado Ado-QEPLPPPPPPSRGGN-CONH2	0.021182	\N	13	1	0	HU (DAPF)	Bait concentration was adjusted to fit the profile to WT	2023/01/17
BIN1	O00499	513-593	SH3	V583I	his6-MBP-TEVsite-SH3	WAS	P42768	335-349	PxxP_4	\N	NKGRSGPLPPVPLGI	Bio Ado Ado-NKGRSGPLPPVPLGI-CONH2	-0.0863295	\N	13	1	0	HU (DAPF)	Bait concentration was adjusted to fit the profile to WT	2023/01/17
BIN1	O00499	513-593	SH3	V583I	his6-MBP-TEVsite-SH3	WAS	P42768	353-367	PxxP_5	\N	PPTPRGPPPPGRGGP	Bio Ado Ado-PPTPRGPPPPGRGGP-CONH2	-0.106388	\N	13	1	0	HU (DAPF)	Bait concentration was adjusted to fit the profile to WT	2023/01/17
BIN1	O00499	513-593	SH3	V583I	his6-MBP-TEVsite-SH3	WAS	P42768	361-375	PxxP_6	\N	PPGRGGPPPPPPPAT	Bio Ado Ado-PPGRGGPPPPPPPAT-CONH2	0.000216666	\N	13	1	0	HU (DAPF)	Bait concentration was adjusted to fit the profile to WT	2023/01/17
BIN1	O00499	513-593	SH3	V583I	his6-MBP-TEVsite-SH3	WAS	P42768	374-388	PxxP_7	\N	ATGRSGPLPPPPPGA	Bio Ado Ado-ATGRSGPLPPPPPGA-CONH2	-0.0499031	\N	13	1	0	HU (DAPF)	Bait concentration was adjusted to fit the profile to WT	2023/01/17
BIN1	O00499	513-593	SH3	V583I	his6-MBP-TEVsite-SH3	WDR33	Q9C0J8	1044-1058	PxxP_1	\N	KWRRGGPGPPFPPDH	Bio Ado Ado-KWRRGGPGPPFPPDH-CONH2	-0.00225267	\N	13	1	0	HU (DAPF)	Bait concentration was adjusted to fit the profile to WT	2023/01/17
BIN1	O00499	513-593	SH3	V583I	his6-MBP-TEVsite-SH3	WDR33	Q9C0J8	939-953	PxxP_2	\N	AQGRIPPLNPGQGPG	Bio Ado Ado-AQGRIPPLNPGQGPG-CONH2	0.00075504	\N	13	1	0	HU (DAPF)	Bait concentration was adjusted to fit the profile to WT	2023/01/17
BIN1	O00499	513-593	SH3	V583I	his6-MBP-TEVsite-SH3	WDR44	Q5JSH3	205-219	PxxP_1	\N	AVEEVAPAKPPRHLT	Bio Ado Ado-AVEEVAPAKPPRHLT-CONH2	0.0262369	\N	13	1	0	HU (DAPF)	Bait concentration was adjusted to fit the profile to WT	2023/01/17
BIN1	O00499	513-593	SH3	V583I	his6-MBP-TEVsite-SH3	WDR44	Q5JSH3	227-241	PxxP_2	\N	STKKPVPARPPPPTN	Bio Ado Ado-STKKPVPARPPPPTN-CONH2	-0.0183655	\N	13	1	0	HU (DAPF)	Bait concentration was adjusted to fit the profile to WT	2023/01/17
BIN1	O00499	513-593	SH3	V583I	his6-MBP-TEVsite-SH3	WDR44	Q5JSH3	241-255	PxxP_3	\N	NFPPPRPPPPSRPAP	Bio Ado Ado-NFPPPRPPPPSRPAP-CONH2	-0.0100388	\N	13	1	0	HU (DAPF)	Bait concentration was adjusted to fit the profile to WT	2023/01/17
BIN1	O00499	513-593	SH3	V583I	his6-MBP-TEVsite-SH3	WDR44	Q5JSH3	247-261	PxxP_4	\N	PPPPSRPAPPPRKRK	Bio Ado Ado-PPPPSRPAPPPRKRK-CONH2	0.758398	\N	13	1	5.49826	HU (DAPF)	Bait concentration was adjusted to fit the profile to WT	2023/01/17
BIN1	O00499	513-593	SH3	V583I	his6-MBP-TEVsite-SH3	WEE1	P30291	3-17	PxxP_1	\N	FLSRQQPPPPRRAGA	Bio Ado Ado-FLSRQQPPPPRRAGA-CONH2	0.00391009	0.0207076	13	2	0	HU (DAPF)	Bait concentration was adjusted to fit the profile to WT	2023/01/17
BIN1	O00499	513-593	SH3	V583I	his6-MBP-TEVsite-SH3	WEE1	P30291	55-69	PxxP_2	\N	FQEPDSPLPPARSPT	Bio Ado Ado-FQEPDSPLPPARSPT-CONH2	0.00118019	\N	13	1	0	HU (DAPF)	Bait concentration was adjusted to fit the profile to WT	2023/01/17
BIN1	O00499	513-593	SH3	V583I	his6-MBP-TEVsite-SH3	WIPF1	O43516	138-152	PxxP_1	\N	AKPFSPPSGPGRFPV	Bio Ado Ado-AKPFSPPSGPGRFPV-CONH2	0.0176641	\N	13	1	0	HU (DAPF)	Bait concentration was adjusted to fit the profile to WT	2023/01/17
BIN1	O00499	513-593	SH3	V583I	his6-MBP-TEVsite-SH3	WIPF1	O43516	155-169	PxxP_2	\N	PGHRSGPPEPQRNRM	Bio Ado Ado-PGHRSGPPEPQRNRM-CONH2	-0.00930991	0.0117841	13	2	0	HU (DAPF)	Bait concentration was adjusted to fit the profile to WT	2023/01/17
BIN1	O00499	513-593	SH3	V583I	his6-MBP-TEVsite-SH3	WIPF1	O43516	165-179	PxxP_3	\N	QRNRMPPPRPDVGSK	Bio Ado Ado-QRNRMPPPRPDVGSK-CONH2	-0.0210185	\N	13	1	0	HU (DAPF)	Bait concentration was adjusted to fit the profile to WT	2023/01/17
BIN1	O00499	513-593	SH3	V583I	his6-MBP-TEVsite-SH3	WIPF1	O43516	198-212	PxxP_4	\N	PHNRGSPPVPGGPRQ	Bio Ado Ado-PHNRGSPPVPGGPRQ-CONH2	0.0182388	\N	13	1	0	HU (DAPF)	Bait concentration was adjusted to fit the profile to WT	2023/01/17
BIN1	O00499	513-593	SH3	V583I	his6-MBP-TEVsite-SH3	WIPF1	O43516	247-261	PxxP_5	\N	SNRPPLPPTPSRALD	Bio Ado Ado-SNRPPLPPTPSRALD-CONH2	-0.0122855	\N	13	1	0	HU (DAPF)	Bait concentration was adjusted to fit the profile to WT	2023/01/17
BIN1	O00499	513-593	SH3	V583I	his6-MBP-TEVsite-SH3	WIPF1	O43516	260-274	PxxP_6	\N	LDDKPPPPPPPVGNR	Bio Ado Ado-LDDKPPPPPPPVGNR-CONH2	0.0335847	\N	13	1	0	HU (DAPF)	Bait concentration was adjusted to fit the profile to WT	2023/01/17
BIN1	O00499	513-593	SH3	V583I	his6-MBP-TEVsite-SH3	WIPF1	O43516	304-318	PxxP_7	\N	SQAPPPPPPPSRPGP	Bio Ado Ado-SQAPPPPPPPSRPGP-CONH2	0.0121192	\N	13	1	0	HU (DAPF)	Bait concentration was adjusted to fit the profile to WT	2023/01/17
BIN1	O00499	513-593	SH3	V583I	his6-MBP-TEVsite-SH3	WIPF1	O43516	326-340	PxxP_8	\N	SGNDETPRLPQRNLS	Bio Ado Ado-SGNDETPRLPQRNLS-CONH2	-0.0238165	\N	13	1	0	HU (DAPF)	Bait concentration was adjusted to fit the profile to WT	2023/01/17
BIN1	O00499	513-593	SH3	V583I	his6-MBP-TEVsite-SH3	WIPF1	O43516	350-364	PxxP_9	\N	SPGRSGPLPPPPSER	Bio Ado Ado-SPGRSGPLPPPPSER-CONH2	-0.0112742	\N	13	1	0	HU (DAPF)	Bait concentration was adjusted to fit the profile to WT	2023/01/17
BIN1	O00499	513-593	SH3	V583I	his6-MBP-TEVsite-SH3	WIPF1	O43516	359-373	PxxP_10	\N	PPPSERPPPPVRDPP	Bio Ado Ado-PPPSERPPPPVRDPP-CONH2	-0.00519448	\N	13	1	0	HU (DAPF)	Bait concentration was adjusted to fit the profile to WT	2023/01/17
BIN1	O00499	513-593	SH3	V583I	his6-MBP-TEVsite-SH3	WIPF1	O43516	372-386	PxxP_11	\N	PPGRSGPLPPPPPVS	Bio Ado Ado-PPGRSGPLPPPPPVS-CONH2	-0.0289161	\N	13	1	0	HU (DAPF)	Bait concentration was adjusted to fit the profile to WT	2023/01/17
BIN1	O00499	513-593	SH3	V583I	his6-MBP-TEVsite-SH3	WIPF1	O43516	390-404	PxxP_12	\N	STSRALPATPQLPSR	Bio Ado Ado-STSRALPATPQLPSR-CONH2	0.0106755	\N	13	1	0	HU (DAPF)	Bait concentration was adjusted to fit the profile to WT	2023/01/17
BIN1	O00499	513-593	SH3	V583I	his6-MBP-TEVsite-SH3	WIPF1	O43516	393-407	PxxP_13	\N	RALPATPQLPSRSGV	Bio Ado Ado-RALPATPQLPSRSGV-CONH2	0.0412078	\N	13	1	0	HU (DAPF)	Bait concentration was adjusted to fit the profile to WT	2023/01/17
BIN1	O00499	513-593	SH3	V583I	his6-MBP-TEVsite-SH3	WIPF1	O43516	408-422	PxxP_14	\N	DSPRSGPRPPLPPDR	Bio Ado Ado-DSPRSGPRPPLPPDR-CONH2	0.0203752	\N	13	1	0	HU (DAPF)	Bait concentration was adjusted to fit the profile to WT	2023/01/17
BIN1	O00499	513-593	SH3	V583I	his6-MBP-TEVsite-SH3	WIPF1	O43516	411-425	PxxP_15	\N	RSGPRPPLPPDRPSA	Bio Ado Ado-RSGPRPPLPPDRPSA-CONH2	0.00617954	\N	13	1	0	HU (DAPF)	Bait concentration was adjusted to fit the profile to WT	2023/01/17
BIN1	O00499	513-593	SH3	V583I	his6-MBP-TEVsite-SH3	WIPF1	O43516	490-503	PxxP_16	\N	RRERGAPPLPPIPR_	Bio Ado Ado-RRERGAPPLPPIPR_-CONH2	0.120061	\N	13	1	4.03735	HU (DAPF)	Bait concentration was adjusted to fit the profile to WT	2023/01/17
BIN1	O00499	513-593	SH3	V583I	his6-MBP-TEVsite-SH3	WIZ	O95785	1135-1149	PxxP_1	\N	PLAKKLPPPPGSPLG	Bio Ado Ado-PLAKKLPPPPGSPLG-CONH2	0.0183234	\N	13	1	0	HU (DAPF)	Bait concentration was adjusted to fit the profile to WT	2023/01/17
BIN1	O00499	513-593	SH3	V583I	his6-MBP-TEVsite-SH3	WIZ	O95785	1164-1178	PxxP_2	\N	FPGLAAPSLPKKLKP	Bio Ado Ado-FPGLAAPSLPKKLKP-CONH2	-0.0284188	\N	13	1	0	HU (DAPF)	Bait concentration was adjusted to fit the profile to WT	2023/01/17
BIN1	O00499	513-593	SH3	V583I	his6-MBP-TEVsite-SH3	WIZ	O95785	157-171	PxxP_3	\N	LPAQPPPLAPFRRVF	Bio Ado Ado-LPAQPPPLAPFRRVF-CONH2	0.251588	\N	13	1	4.4476	HU (DAPF)	Bait concentration was adjusted to fit the profile to WT	2023/01/17
BIN1	O00499	513-593	SH3	V583I	his6-MBP-TEVsite-SH3	WIZ	O95785	9-23	PxxP_4	\N	LAAPDRPQGPERLPG	Bio Ado Ado-LAAPDRPQGPERLPG-CONH2	0.00218729	\N	13	1	0	HU (DAPF)	Bait concentration was adjusted to fit the profile to WT	2023/01/17
BIN1	O00499	513-593	SH3	V583I	his6-MBP-TEVsite-SH3	XRN2	Q9H0D6	933-947	PxxP_1	\N	REGRKYPLPPPSGRY	Bio Ado Ado-REGRKYPLPPPSGRY-CONH2	0.100915	\N	13	1	3.94991	HU (DAPF)	Bait concentration was adjusted to fit the profile to WT	2023/01/17
BIN1	O00499	513-593	SH3	V583I	his6-MBP-TEVsite-SH3	YAF2	Q8IY57	3-17	PxxP_1	\N	DKKSPTRPKRQPKPS	Bio Ado Ado-DKKSPTRPKRQPKPS-CONH2	0.328681	0.0143065	13	2	4.62221	HU (DAPF)	Bait concentration was adjusted to fit the profile to WT	2023/01/17
BIN1	O00499	513-593	SH3	V583I	his6-MBP-TEVsite-SH3	ZC3H13	Q5T200	1025-1039	PxxP_1	\N	SKKKRGPRTPPITTK	Bio Ado Ado-SKKKRGPRTPPITTK-CONH2	0.135881	\N	13	1	4.10119	HU (DAPF)	Bait concentration was adjusted to fit the profile to WT	2023/01/17
BIN1	O00499	513-593	SH3	V583I	his6-MBP-TEVsite-SH3	ZC3H13	Q5T200	255-269	PxxP_2	\N	QSKKKGPRTPSPPPP	Bio Ado Ado-QSKKKGPRTPSPPPP-CONH2	0.00241554	\N	13	1	0	HU (DAPF)	Bait concentration was adjusted to fit the profile to WT	2023/01/17
BIN1	O00499	513-593	SH3	V583I	his6-MBP-TEVsite-SH3	ZC3H13	Q5T200	562-576	PxxP_3	\N	RSRGRVPELPEKGSR	Bio Ado Ado-RSRGRVPELPEKGSR-CONH2	0.00946885	\N	13	1	0	HU (DAPF)	Bait concentration was adjusted to fit the profile to WT	2023/01/17
BIN1	O00499	513-593	SH3	V583I	his6-MBP-TEVsite-SH3	ZC3H13	Q5T200	635-649	PxxP_4	\N	RERDQRPSSPIRHQG	Bio Ado Ado-RERDQRPSSPIRHQG-CONH2	-0.0120069	\N	13	1	0	HU (DAPF)	Bait concentration was adjusted to fit the profile to WT	2023/01/17
BIN1	O00499	513-593	SH3	V583I	his6-MBP-TEVsite-SH3	ZC3H13	Q5T200	72-86	PxxP_5	\N	SNYRRSPERPTGDLR	Bio Ado Ado-SNYRRSPERPTGDLR-CONH2	0.0168708	\N	13	1	0	HU (DAPF)	Bait concentration was adjusted to fit the profile to WT	2023/01/17
BIN1	O00499	513-593	SH3	V583I	his6-MBP-TEVsite-SH3	ZC3H14	Q6PJT7	329-343	PxxP_1	\N	SSSVSVPAKPERRPS	Bio Ado Ado-SSSVSVPAKPERRPS-CONH2	0.0260976	0.0262174	13	2	0	HU (DAPF)	Bait concentration was adjusted to fit the profile to WT	2023/01/17
BIN1	O00499	513-593	SH3	V583I	his6-MBP-TEVsite-SH3	ZC4H2	Q9NQZ6	209-223	PxxP_1	\N	KSRSRNPKKPKRKQD	Bio Ado Ado-KSRSRNPKKPKRKQD-CONH2	0.153273	\N	13	1	4.16476	HU (DAPF)	Bait concentration was adjusted to fit the profile to WT	2023/01/17
BIN1	O00499	513-593	SH3	V583I	his6-MBP-TEVsite-SH3	ZNF280C	Q8ND82	72-86	PxxP_1	\N	KGIKSEPHSPGIPEI	Bio Ado Ado-KGIKSEPHSPGIPEI-CONH2	-0.0313251	\N	13	1	0	HU (DAPF)	Bait concentration was adjusted to fit the profile to WT	2023/01/17
BIN1	O00499	513-593	SH3	V583I	his6-MBP-TEVsite-SH3	ZNF280C	Q8ND82	92-106	PxxP_2	\N	QRCRDPPSNPVAASP	Bio Ado Ado-QRCRDPPSNPVAASP-CONH2	0.042548	\N	13	1	0	HU (DAPF)	Bait concentration was adjusted to fit the profile to WT	2023/01/17
BIN1	O00499	513-593	SH3	V583I	his6-MBP-TEVsite-SH3	ZNF787	Q6DD87	56-70	PxxP_1	\N	PPPRPRPPAPYICNE	Bio Ado Ado-PPPRPRPPAPYICNE-CONH2	-0.0241557	\N	13	1	0	HU (DAPF)	Bait concentration was adjusted to fit the profile to WT	2023/01/17
BIN1	O00499	513-593	SH3	\N	his6-MBP-TEVsite-SH3	ACAP1	Q15027	534-548	PxxP_1	\N	GRPRGQPPVPPKPSI	bio ado ado-GRPRGQPPVPPKPSI	0.06976	0.0159316	18	4	3.62652	HU (DAPF)	Quadratic binding equation	2022.06.29.
BIN1	O00499	513-593	SH3	\N	his6-MBP-TEVsite-SH3	ACAP1	Q15027	553-567	PxxP_2	\N	GSLRSKPEPPSEDLG	bio ado ado-GSLRSKPEPPSEDLG	-0.0163132	0.01469	18	2	0	HU (DAPF)	Quadratic binding equation	2022.06.29.
BIN1	O00499	513-593	SH3	\N	his6-MBP-TEVsite-SH3	ARHGAP17	Q68EM7	632-646	PxxP_1	\N	AVKKPAPAPPKPGNP	bio ado ado-AVKKPAPAPPKPGNP	0.00533906	0.0130756	18	2	0	HU (DAPF)	Quadratic binding equation	2022.06.29.
BIN1	O00499	513-593	SH3	\N	his6-MBP-TEVsite-SH3	ARHGAP17	Q68EM7	662-676	PxxP_2	\N	HPPSLSPKPPTRSPS	bio ado ado-HPPSLSPKPPTRSPS	0.137112	0.059785	18	2	3.95929	HU (DAPF)	Quadratic binding equation	2022.06.29.
BIN1	O00499	513-593	SH3	\N	his6-MBP-TEVsite-SH3	ARHGAP17	Q68EM7	765-779	PxxP_3	\N	PLGKQNPSLPAPQTL	bio ado ado-PLGKQNPSLPAPQTL	-0.0165166	0.0250825	18	2	0	HU (DAPF)	Quadratic binding equation	2022.06.29.
BIN1	O00499	513-593	SH3	\N	his6-MBP-TEVsite-SH3	ARHGAP17	Q68EM7	801-815	PxxP_4	\N	PKPRNRPSVPPPPQP	bio ado ado-PKPRNRPSVPPPPQP	0.0144646	0.0110165	18	2	0	HU (DAPF)	Quadratic binding equation	2022.06.29.
BIN1	O00499	513-593	SH3	\N	his6-MBP-TEVsite-SH3	ARHGAP45	Q92619	1106-1120	PxxP_1	\N	NNVLQAPLPPMRLRG	bio ado ado-NNVLQAPLPPMRLRG	0.562802	0.0239795	18	2	4.91243	HU (DAPF)	Quadratic binding equation	2022.06.29.
BIN1	O00499	513-593	SH3	\N	his6-MBP-TEVsite-SH3	ARHGAP45	Q92619	681-695	PxxP_2	\N	ELPVAVPSGPFRHEG	bio ado ado-ELPVAVPSGPFRHEG	-0.0134964	0.0159708	18	2	0	HU (DAPF)	Quadratic binding equation	2022.06.29.
BIN1	O00499	513-593	SH3	\N	his6-MBP-TEVsite-SH3	BUD13	Q9BRD0	194-208	PxxP_1	\N	RHDSPDPSPPRRPQH	bio ado ado-RHDSPDPSPPRRPQH	0.0455353	0.00487674	18	2	0	HU (DAPF)	Quadratic binding equation	2022.06.29.
BIN1	O00499	513-593	SH3	\N	his6-MBP-TEVsite-SH3	BUD13	Q9BRD0	219-233	PxxP_2	\N	RHDSPDPSPPRRARH	bio ado ado-RHDSPDPSPPRRARH	0.458843	0.0372317	18	2	4.71978	HU (DAPF)	Quadratic binding equation	2022.06.29.
BIN1	O00499	513-593	SH3	\N	his6-MBP-TEVsite-SH3	C1orf122	Q6ZSJ8	25-39	PxxP_1	\N	GLGGRPPPQPPREER	bio ado ado-GLGGRPPPQPPREER	0.00756355	0.02932	18	2	0	HU (DAPF)	Quadratic binding equation	2022.06.29.
BIN1	O00499	513-593	SH3	\N	his6-MBP-TEVsite-SH3	C1orf122	Q6ZSJ8	26-40	PxxP_2	\N	LGGRPPPQPPREERA	bio ado ado-LGGRPPPQPPREERA	0.027669	0.0294891	18	2	0	HU (DAPF)	Quadratic binding equation	2022.06.29.
BIN1	O00499	513-593	SH3	\N	his6-MBP-TEVsite-SH3	CBL	P22681	488-502	PxxP_1	\N	APQASLPPVPPRLDL	bio ado ado-APQASLPPVPPRLDL	0.00190372	0.036784	18	2	0	HU (DAPF)	Quadratic binding equation	2022.06.29.
BIN1	O00499	513-593	SH3	\N	his6-MBP-TEVsite-SH3	CBL	P22681	528-542	PxxP_2	\N	HKDKPLPVPPTLRDL	bio ado ado-HKDKPLPVPPTLRDL	-0.0247153	0.0275842	18	2	0	HU (DAPF)	Quadratic binding equation	2022.06.29.
BIN1	O00499	513-593	SH3	\N	his6-MBP-TEVsite-SH3	CBL	P22681	537-551	PxxP_3	\N	PTLRDLPPPPPPDRP	bio ado ado-PTLRDLPPPPPPDRP	0.048489	0.0103293	18	2	0	HU (DAPF)	Quadratic binding equation	2022.06.29.
BIN1	O00499	513-593	SH3	\N	his6-MBP-TEVsite-SH3	CBL	P22681	539-553	PxxP_4	\N	LRDLPPPPPPDRPYS	bio ado ado-LRDLPPPPPPDRPYS	0.0297501	0.0508221	18	2	0	HU (DAPF)	Quadratic binding equation	2022.06.29.
BIN1	O00499	513-593	SH3	\N	his6-MBP-TEVsite-SH3	CBL	P22681	560-574	PxxP_5	\N	PQRRPLPCTPGDCPS	bio ado ado-PQRRPLPCTPGDCPS	0.0175813	0.0295561	18	2	0	HU (DAPF)	Quadratic binding equation	2022.06.29.
BIN1	O00499	513-593	SH3	\N	his6-MBP-TEVsite-SH3	CBL	P22681	590-604	PxxP_6	\N	WLPRPIPKVPVSAPS	bio ado ado-WLPRPIPKVPVSAPS	0.0334907	0.0175056	18	2	0	HU (DAPF)	Quadratic binding equation	2022.06.29.
BIN1	O00499	513-593	SH3	\N	his6-MBP-TEVsite-SH3	CBL	P22681	814-828	PxxP_7	\N	TEGSQVPERPPKPFP	bio ado ado-TEGSQVPERPPKPFP	-0.00224957	0.00612155	18	2	0	HU (DAPF)	Quadratic binding equation	2022.06.29.
BIN1	O00499	513-593	SH3	\N	his6-MBP-TEVsite-SH3	CDC27	P30260	396-410	PxxP_1	\N	LKMKFPPKIPNRKTK	bio ado ado-LKMKFPPKIPNRKTK	0.813405	0.00806617	18	4	5.47072	HU (DAPF)	Quadratic binding equation	2022.06.29.
BIN1	O00499	513-593	SH3	\N	his6-MBP-TEVsite-SH3	DDX42	Q86XP3	183-197	PxxP_1	\N	YDSDGNPIAPTKKII	bio ado ado-YDSDGNPIAPTKKII	-0.0111835	0.0506689	18	2	0	HU (DAPF)	Quadratic binding equation	2022.06.29.
BIN1	O00499	513-593	SH3	\N	his6-MBP-TEVsite-SH3	DDX42	Q86XP3	23-37	PxxP_2	\N	AGKKEEPKLPQQSHS	bio ado ado-AGKKEEPKLPQQSHS	-0.017741	0.0287297	18	2	0	HU (DAPF)	Quadratic binding equation	2022.06.29.
BIN1	O00499	513-593	SH3	\N	his6-MBP-TEVsite-SH3	DDX42	Q86XP3	920-934	PxxP_3	\N	ADGFAVPEPPKRKKS	bio ado ado-ADGFAVPEPPKRKKS	0.677242	0.00415158	18	2	5.13743	HU (DAPF)	Quadratic binding equation	2022.06.29.
BIN1	O00499	513-593	SH3	\N	his6-MBP-TEVsite-SH3	DMBT1	Q9UGM3	215-229	PxxP_1	\N	WPVRISPPVPTEGSE	bio ado ado-WPVRISPPVPTEGSE	-0.0337638	0.0627608	18	2	0	HU (DAPF)	Quadratic binding equation	2022.06.29.
BIN1	O00499	513-593	SH3	\N	his6-MBP-TEVsite-SH3	DNM2	P50570	313-327	PxxP_1	\N	EYKNFRPDDPTRKTK	bio ado ado-EYKNFRPDDPTRKTK	-0.00456706	0.0107249	18	2	0	HU (DAPF)	Quadratic binding equation	2022.06.29.
BIN1	O00499	513-593	SH3	\N	his6-MBP-TEVsite-SH3	DNM2	P50570	801-815	PxxP_2	\N	AASFSAPPIPSRPGP	bio ado ado-AASFSAPPIPSRPGP	0.0215775	0.0164634	18	2	0	HU (DAPF)	Quadratic binding equation	2022.06.29.
BIN1	O00499	513-593	SH3	\N	his6-MBP-TEVsite-SH3	DNM2	P50570	823-837	PxxP_3	\N	DLFPAPPQIPSRPVR	bio ado ado-DLFPAPPQIPSRPVR	0.26139	0.0550664	18	2	4.31959	HU (DAPF)	Quadratic binding equation	2022.06.29.
BIN1	O00499	513-593	SH3	\N	his6-MBP-TEVsite-SH3	DNM2	P50570	826-840	PxxP_4	\N	PAPPQIPSRPVRIPP	bio ado ado-PAPPQIPSRPVRIPP	0.117352	0.00263377	18	2	3.87991	HU (DAPF)	Quadratic binding equation	2022.06.29.
BIN1	O00499	513-593	SH3	\N	his6-MBP-TEVsite-SH3	DNM2	P50570	834-848	PxxP_5	\N	RPVRIPPGIPPGVPS	bio ado ado-RPVRIPPGIPPGVPS	0.0519881	0.0145714	18	2	3.48886	HU (DAPF)	Quadratic binding equation	2022.06.29.
BIN1	O00499	513-593	SH3	\N	his6-MBP-TEVsite-SH3	DNM2	P50570	838-852	PxxP_6	\N	IPPGIPPGVPSRRPP	bio ado ado-IPPGIPPGVPSRRPP	0.104617	0.00291054	18	2	3.82253	HU (DAPF)	Quadratic binding equation	2022.06.29.
BIN1	O00499	513-593	SH3	\N	his6-MBP-TEVsite-SH3	DNM2	P50570	846-860	PxxP_7	\N	VPSRRPPAAPSRPTI	bio ado ado-VPSRRPPAAPSRPTI	0.0563818	0.0383041	18	4	3.52655	HU (DAPF)	Quadratic binding equation	2022.06.29.
BIN1	O00499	513-593	SH3	\N	his6-MBP-TEVsite-SH3	DNMT1	P26358	129-143	PxxP_1	\N	PKPLSKPRTPRRSKS	bio ado ado-PKPLSKPRTPRRSKS	0.64063	0.0554584	18	2	5.06249	HU (DAPF)	Quadratic binding equation	2022.06.29.
BIN1	O00499	513-593	SH3	\N	his6-MBP-TEVsite-SH3	DNMT1	P26358	323-337	PxxP_2	\N	KRRKTTPKEPTEKKM	bio ado ado-KRRKTTPKEPTEKKM	0.0351325	0.00423328	18	2	0	HU (DAPF)	Quadratic binding equation	2022.06.29.
BIN1	O00499	513-593	SH3	\N	his6-MBP-TEVsite-SH3	EZH2	Q15910	341-355	PxxP_1	\N	ERIKTPPKRPGGRRR	bio ado ado-ERIKTPPKRPGGRRR	0.437598	0.0143389	18	2	4.68018	HU (DAPF)	Quadratic binding equation	2022.06.29.
BIN1	O00499	513-593	SH3	\N	his6-MBP-TEVsite-SH3	G3BP1	Q13283	288-302	PxxP_1	\N	PESQIPPQRPQRDQR	bio ado ado-PESQIPPQRPQRDQR	0.159188	0.0226365	18	2	4.03758	HU (DAPF)	Quadratic binding equation	2022.06.29.
BIN1	O00499	513-593	SH3	\N	his6-MBP-TEVsite-SH3	HDGFL2	Q7Z4V5	288-302	PxxP_1	\N	RGRKPKPERPPSSSS	bio ado ado-RGRKPKPERPPSSSS	0.0917831	0.0343874	18	2	3.75825	HU (DAPF)	Quadratic binding equation	2022.06.29.
BIN1	O00499	513-593	SH3	\N	his6-MBP-TEVsite-SH3	HIRIP3	Q9BW71	531-545	PxxP_1	\N	DEERPRPAPPDWSHM	bio ado ado-DEERPRPAPPDWSHM	-0.00924692	0.0161613	18	2	0	HU (DAPF)	Quadratic binding equation	2022.06.29.
BIN1	O00499	513-593	SH3	\N	his6-MBP-TEVsite-SH3	HMGA1	P17096	28-42	PxxP_1	\N	RPRKQPPVSPGTALV	bio ado ado-RPRKQPPVSPGTALV	0.0919924	0.0277988	18	2	3.75936	HU (DAPF)	Quadratic binding equation	2022.06.29.
BIN1	O00499	513-593	SH3	\N	his6-MBP-TEVsite-SH3	HNRNPK	P61978	266-280	PxxP_1	\N	PGRGGRPMPPSRRDY	bio ado ado-PGRGGRPMPPSRRDY	0.396517	0.00222282	18	2	4.60238	HU (DAPF)	Quadratic binding equation	2022.06.29.
BIN1	O00499	513-593	SH3	\N	his6-MBP-TEVsite-SH3	HNRNPK	P61978	283-297	PxxP_2	\N	MSPRRGPPPPPPGRG	bio ado ado-MSPRRGPPPPPPGRG	0.217566	0.0210163	18	2	4.21039	HU (DAPF)	Quadratic binding equation	2022.06.29.
BIN1	O00499	513-593	SH3	\N	his6-MBP-TEVsite-SH3	HNRNPK	P61978	284-298	PxxP_3	\N	SPRRGPPPPPPGRGG	bio ado ado-SPRRGPPPPPPGRGG	0.300224	0.0625859	18	2	4.4072	HU (DAPF)	Quadratic binding equation	2022.06.29.
BIN1	O00499	513-593	SH3	\N	his6-MBP-TEVsite-SH3	HNRNPK	P61978	285-299	PxxP_4	\N	PRRGPPPPPPGRGGR	bio ado ado-PRRGPPPPPPGRGGR	0.432583	0.02954	18	2	4.67079	HU (DAPF)	Quadratic binding equation	2022.06.29.
BIN1	O00499	513-593	SH3	\N	his6-MBP-TEVsite-SH3	HNRNPK	P61978	302-316	PxxP_5	\N	SRARNLPLPPPPPPR	bio ado ado-SRARNLPLPPPPPPR	0.429322	0.0285596	18	2	4.66466	HU (DAPF)	Quadratic binding equation	2022.06.29.
BIN1	O00499	513-593	SH3	\N	his6-MBP-TEVsite-SH3	HNRNPK	P61978	305-319	PxxP_6	\N	RNLPLPPPPPPRGGD	bio ado ado-RNLPLPPPPPPRGGD	0.122373	0.0483389	18	2	3.90108	HU (DAPF)	Quadratic binding equation	2022.06.29.
BIN1	O00499	513-593	SH3	\N	his6-MBP-TEVsite-SH3	IRF2BP1	Q8IU81	361-375	PxxP_1	\N	ALCGPPPRAPSRNLA	bio ado ado-ALCGPPPRAPSRNLA	0.183884	0.0122931	18	2	4.11564	HU (DAPF)	Quadratic binding equation	2022.06.29.
BIN1	O00499	513-593	SH3	\N	his6-MBP-TEVsite-SH3	KHDRBS1	Q07666	32-46	PxxP_1	\N	QTPSRQPPLPHRSRG	bio ado ado-QTPSRQPPLPHRSRG	0.266291	0.0675781	18	2	4.33105	HU (DAPF)	Quadratic binding equation	2022.06.29.
BIN1	O00499	513-593	SH3	\N	his6-MBP-TEVsite-SH3	KHDRBS1	Q07666	328-342	PxxP_2	\N	TVTRGVPPPPTVRGA	bio ado ado-TVTRGVPPPPTVRGA	0.0128749	0.0298264	18	2	0	HU (DAPF)	Quadratic binding equation	2022.06.29.
BIN1	O00499	513-593	SH3	\N	his6-MBP-TEVsite-SH3	KHDRBS1	Q07666	421-435	PxxP_3	\N	PSLKAPPARPVKGAY	bio ado ado-PSLKAPPARPVKGAY	0.0203315	0.0147394	18	4	0	HU (DAPF)	Quadratic binding equation	2022.06.29.
BIN1	O00499	513-593	SH3	\N	his6-MBP-TEVsite-SH3	MKI67	P46013	1083-1097	PxxP_1	\N	TGMKKWPRTPKEEAQ	bio ado ado-TGMKKWPRTPKEEAQ	-0.0140372	0.00693136	18	2	0	HU (DAPF)	Quadratic binding equation	2022.06.29.
BIN1	O00499	513-593	SH3	\N	his6-MBP-TEVsite-SH3	MKI67	P46013	1327-1341	PxxP_2	\N	TGSKRRPQTPKEEAQ	bio ado ado-TGSKRRPQTPKEEAQ	0.00828526	0.00306724	18	2	0	HU (DAPF)	Quadratic binding equation	2022.06.29.
BIN1	O00499	513-593	SH3	\N	his6-MBP-TEVsite-SH3	MKI67	P46013	1385-1399	PxxP_3	\N	TSTRRQPKTPLEKRD	bio ado ado-TSTRRQPKTPLEKRD	0.0428479	0.0203519	18	2	0	HU (DAPF)	Quadratic binding equation	2022.06.29.
BIN1	O00499	513-593	SH3	\N	his6-MBP-TEVsite-SH3	MKI67	P46013	1935-1949	PxxP_4	\N	PGSKRRPQTPKEKAK	bio ado ado-PGSKRRPQTPKEKAK	0.00158289	0.114112	18	2	0	HU (DAPF)	Quadratic binding equation	2022.06.29.
BIN1	O00499	513-593	SH3	\N	his6-MBP-TEVsite-SH3	MKI67	P46013	2115-2129	PxxP_5	\N	TSTRRRPKTPLGKRD	bio ado ado-TSTRRRPKTPLGKRD	0.112441	0.00676144	18	2	3.85844	HU (DAPF)	Quadratic binding equation	2022.06.29.
BIN1	O00499	513-593	SH3	\N	his6-MBP-TEVsite-SH3	MKI67	P46013	2175-2189	PxxP_6	\N	TGSKRQPRTPKGKAQ	bio ado ado-TGSKRQPRTPKGKAQ	0.0156326	0.00851434	18	2	0	HU (DAPF)	Quadratic binding equation	2022.06.29.
BIN1	O00499	513-593	SH3	\N	his6-MBP-TEVsite-SH3	MKI67	P46013	2297-2311	PxxP_7	\N	PGSKRWPQTPKEKAQ	bio ado ado-PGSKRWPQTPKEKAQ	-0.0262151	0.00406099	18	2	0	HU (DAPF)	Quadratic binding equation	2022.06.29.
BIN1	O00499	513-593	SH3	\N	his6-MBP-TEVsite-SH3	MKI67	P46013	2418-2432	PxxP_8	\N	PGSKRQPQTPKEKAE	bio ado ado-PGSKRQPQTPKEKAE	-0.00352779	0.00425929	18	2	0	HU (DAPF)	Quadratic binding equation	2022.06.29.
BIN1	O00499	513-593	SH3	\N	his6-MBP-TEVsite-SH3	MKI67	P46013	2660-2674	PxxP_9	\N	EPSRRRPRAPKEKAQ	bio ado ado-EPSRRRPRAPKEKAQ	0.055783	0.0137505	18	2	3.52157	HU (DAPF)	Quadratic binding equation	2022.06.29.
BIN1	O00499	513-593	SH3	\N	his6-MBP-TEVsite-SH3	MKI67	P46013	2781-2795	PxxP_10	\N	TGSRRRPRAPRESAQ	bio ado ado-TGSRRRPRAPRESAQ	0.0733313	0.0123711	18	2	3.65023	HU (DAPF)	Quadratic binding equation	2022.06.29.
BIN1	O00499	513-593	SH3	\N	his6-MBP-TEVsite-SH3	MKI67	P46013	2899-2913	PxxP_11	\N	IGSRRQPRAPKEKAQ	bio ado ado-IGSRRQPRAPKEKAQ	0.0368754	0.0256483	18	2	0	HU (DAPF)	Quadratic binding equation	2022.06.29.
BIN1	O00499	513-593	SH3	\N	his6-MBP-TEVsite-SH3	MKI67	P46013	2986-3000	PxxP_12	\N	KSNTSLPPLPFKRGG	bio ado ado-KSNTSLPPLPFKRGG	0.170863	0.0568408	18	2	4.07556	HU (DAPF)	Quadratic binding equation	2022.06.29.
BIN1	O00499	513-593	SH3	\N	his6-MBP-TEVsite-SH3	MKI67	P46013	517-531	PxxP_13	\N	FDENLPPNTPLKRGE	bio ado ado-FDENLPPNTPLKRGE	0.0152209	0.0238062	18	2	0	HU (DAPF)	Quadratic binding equation	2022.06.29.
BIN1	O00499	513-593	SH3	\N	his6-MBP-TEVsite-SH3	MKI67	P46013	686-700	PxxP_14	\N	NKRQRRPATPKKPVG	bio ado ado-NKRQRRPATPKKPVG	0.16261	0.0440236	18	2	4.04893	HU (DAPF)	Quadratic binding equation	2022.06.29.
BIN1	O00499	513-593	SH3	\N	his6-MBP-TEVsite-SH3	MUC5AC	P98088	1311-1325	PxxP_1	\N	IERRVYPCSPTTPVP	bio ado ado-IERRVYPCSPTTPVP	-0.00445779	0.00603191	18	2	0	HU (DAPF)	Quadratic binding equation	2022.06.29.
BIN1	O00499	513-593	SH3	\N	his6-MBP-TEVsite-SH3	MUC5AC	P98088	1563-1577	PxxP_2	\N	VSSKPTPTEPSTSSC	bio ado ado-VSSKPTPTEPSTSSC	0.058539	0.036711	18	2	3.54406	HU (DAPF)	Quadratic binding equation	2022.06.29.
BIN1	O00499	513-593	SH3	\N	his6-MBP-TEVsite-SH3	MUC5AC	P98088	1936-1950	PxxP_3	\N	VSSKPTPTEPSTSSC	bio ado ado-VSSKPTPTEPSTSSC	0.0175368	0.0308734	18	2	0	HU (DAPF)	Quadratic binding equation	2022.06.29.
BIN1	O00499	513-593	SH3	\N	his6-MBP-TEVsite-SH3	MUC5AC	P98088	5643-5657	PxxP_4	\N	SWERGVPVSPMH---	bio ado ado-SWERGVPVSPMH---	-0.0304476	0.089964	18	2	0	HU (DAPF)	Quadratic binding equation	2022.06.29.
BIN1	O00499	513-593	SH3	\N	his6-MBP-TEVsite-SH3	NOLC1	Q14978	193-207	PxxP_1	\N	KAQTKAPPKPARAAP	bio ado ado-KAQTKAPPKPARAAP	0.10542	0.00725118	18	2	3.82632	HU (DAPF)	Quadratic binding equation	2022.06.29.
BIN1	O00499	513-593	SH3	\N	his6-MBP-TEVsite-SH3	PKN1	Q16512	565-579	PxxP_1	\N	KSSRDPPSSPSSLSS	bio ado ado-KSSRDPPSSPSSLSS	0.00328299	0.00282997	18	2	0	HU (DAPF)	Quadratic binding equation	2022.06.29.
BIN1	O00499	513-593	SH3	\N	his6-MBP-TEVsite-SH3	PPP1R12A	O14974	401-415	PxxP_1	\N	SSGQATPTSPIKKFP	bio ado ado-SSGQATPTSPIKKFP	0.0262724	0.00377154	18	2	0	HU (DAPF)	Quadratic binding equation	2022.06.29.
BIN1	O00499	513-593	SH3	\N	his6-MBP-TEVsite-SH3	PPP1R12A	O14974	493-507	PxxP_2	\N	RLAYVAPTIPRRLAS	bio ado ado-RLAYVAPTIPRRLAS	0.206108	0.000507056	18	2	4.17942	HU (DAPF)	Quadratic binding equation	2022.06.29.
BIN1	O00499	513-593	SH3	\N	his6-MBP-TEVsite-SH3	PRRC2A	P48634	1192-1206	PxxP_1	\N	LAPKKPPTGPLPPSK	bio ado ado-LAPKKPPTGPLPPSK	-0.0140064	0.00755082	18	2	0	HU (DAPF)	Quadratic binding equation	2022.06.29.
BIN1	O00499	513-593	SH3	\N	his6-MBP-TEVsite-SH3	PRRC2A	P48634	1195-1209	PxxP_2	\N	KKPPTGPLPPSKEPL	bio ado ado-KKPPTGPLPPSKEPL	-0.0310061	0.0128908	18	2	0	HU (DAPF)	Quadratic binding equation	2022.06.29.
BIN1	O00499	513-593	SH3	\N	his6-MBP-TEVsite-SH3	PRRC2A	P48634	120-134	PxxP_3	\N	NQPKRPPAAPENTPL	bio ado ado-NQPKRPPAAPENTPL	-0.0197795	0.00644962	18	2	0	HU (DAPF)	Quadratic binding equation	2022.06.29.
BIN1	O00499	513-593	SH3	\N	his6-MBP-TEVsite-SH3	PRRC2A	P48634	1495-1509	PxxP_4	\N	GHPRHKPGLPQAPQG	bio ado ado-GHPRHKPGLPQAPQG	0.011653	0.0365132	18	2	0	HU (DAPF)	Quadratic binding equation	2022.06.29.
BIN1	O00499	513-593	SH3	\N	his6-MBP-TEVsite-SH3	PRRC2A	P48634	1506-1520	PxxP_5	\N	APQGPSPRPPTRYEP	bio ado ado-APQGPSPRPPTRYEP	0.0169929	0.00170654	18	2	0	HU (DAPF)	Quadratic binding equation	2022.06.29.
BIN1	O00499	513-593	SH3	\N	his6-MBP-TEVsite-SH3	PRRC2A	P48634	1549-1563	PxxP_6	\N	DSAGVSPFPPKRRER	bio ado ado-DSAGVSPFPPKRRER	0.608462	0.0720914	18	2	4.99928	HU (DAPF)	Quadratic binding equation	2022.06.29.
BIN1	O00499	513-593	SH3	\N	his6-MBP-TEVsite-SH3	PRRC2A	P48634	1705-1719	PxxP_7	\N	EPPRRPPPAPHDGDR	bio ado ado-EPPRRPPPAPHDGDR	-0.00707205	0.0343083	18	2	0	HU (DAPF)	Quadratic binding equation	2022.06.29.
BIN1	O00499	513-593	SH3	\N	his6-MBP-TEVsite-SH3	PRRC2A	P48634	1721-1735	PxxP_8	\N	ELPREQPLPPGPIGT	bio ado ado-ELPREQPLPPGPIGT	-0.00745123	0.00483601	18	2	0	HU (DAPF)	Quadratic binding equation	2022.06.29.
BIN1	O00499	513-593	SH3	\N	his6-MBP-TEVsite-SH3	PRRC2A	P48634	261-275	PxxP_9	\N	FPPPYGPQGPYRYPT	bio ado ado-FPPPYGPQGPYRYPT	-0.0132166	0.00609601	18	2	0	HU (DAPF)	Quadratic binding equation	2022.06.29.
BIN1	O00499	513-593	SH3	\N	his6-MBP-TEVsite-SH3	PRRC2A	P48634	270-284	PxxP_10	\N	PYRYPTPDGPSRFPR	bio ado ado-PYRYPTPDGPSRFPR	0.0326015	0.0471137	18	2	0	HU (DAPF)	Quadratic binding equation	2022.06.29.
BIN1	O00499	513-593	SH3	\N	his6-MBP-TEVsite-SH3	PRRC2A	P48634	502-516	PxxP_11	\N	KRLKAEPAAPPAAPS	bio ado ado-KRLKAEPAAPPAAPS	-0.0103243	0.0149405	18	2	0	HU (DAPF)	Quadratic binding equation	2022.06.29.
BIN1	O00499	513-593	SH3	\N	his6-MBP-TEVsite-SH3	PRRC2A	P48634	523-537	PxxP_12	\N	AVPKELPAPPAPPPA	bio ado ado-AVPKELPAPPAPPPA	0.0210293	0.02111	18	2	0	HU (DAPF)	Quadratic binding equation	2022.06.29.
BIN1	O00499	513-593	SH3	\N	his6-MBP-TEVsite-SH3	PRRC2A	P48634	585-599	PxxP_13	\N	EASPVEPQLPSKEGP	bio ado ado-EASPVEPQLPSKEGP	-0.00332702	0.00660104	18	2	0	HU (DAPF)	Quadratic binding equation	2022.06.29.
BIN1	O00499	513-593	SH3	\N	his6-MBP-TEVsite-SH3	PRRC2A	P48634	593-607	PxxP_14	\N	LPSKEGPEPPEEVPP	bio ado ado-LPSKEGPEPPEEVPP	-0.00361572	0.0020639	18	2	0	HU (DAPF)	Quadratic binding equation	2022.06.29.
BIN1	O00499	513-593	SH3	\N	his6-MBP-TEVsite-SH3	PRRC2A	P48634	690-704	PxxP_15	\N	VPAPQAPPPPPKALY	bio ado ado-VPAPQAPPPPPKALY	-0.00241675	0.00210499	18	2	0	HU (DAPF)	Quadratic binding equation	2022.06.29.
BIN1	O00499	513-593	SH3	\N	his6-MBP-TEVsite-SH3	PRRC2A	P48634	707-721	PxxP_16	\N	ALGRPPPMPPMNFDP	bio ado ado-ALGRPPPMPPMNFDP	-0.00111691	0.0333388	18	2	0	HU (DAPF)	Quadratic binding equation	2022.06.29.
BIN1	O00499	513-593	SH3	\N	his6-MBP-TEVsite-SH3	PRRC2A	P48634	859-873	PxxP_17	\N	PGPRPLPWPPGSDEV	bio ado ado-PGPRPLPWPPGSDEV	-0.0398903	0.00292882	18	2	0	HU (DAPF)	Quadratic binding equation	2022.06.29.
BIN1	O00499	513-593	SH3	\N	his6-MBP-TEVsite-SH3	PRRC2A	P48634	907-921	PxxP_18	\N	GSGGQGPPPPRRESR	bio ado ado-GSGGQGPPPPRRESR	0.150557	0.0296266	18	2	4.00807	HU (DAPF)	Quadratic binding equation	2022.06.29.
BIN1	O00499	513-593	SH3	\N	his6-MBP-TEVsite-SH3	PRRC2A	P48634	936-950	PxxP_19	\N	GIPPEEPGAPPRRAG	bio ado ado-GIPPEEPGAPPRRAG	0.0626777	0.0274947	18	2	3.57604	HU (DAPF)	Quadratic binding equation	2022.06.29.
BIN1	O00499	513-593	SH3	\N	his6-MBP-TEVsite-SH3	PRRC2A	P48634	949-963	PxxP_20	\N	AGPIKKPPPPTKVEE	bio ado ado-AGPIKKPPPPTKVEE	0.0070642	0.0219404	18	2	0	HU (DAPF)	Quadratic binding equation	2022.06.29.
BIN1	O00499	513-593	SH3	\N	his6-MBP-TEVsite-SH3	PRRC2C	Q9Y520	1053-1067	PxxP_1	\N	TEKKDLPPPPPPPQP	bio ado ado-TEKKDLPPPPPPPQP	0.00212309	0.00362263	18	2	0	HU (DAPF)	Quadratic binding equation	2022.06.29.
BIN1	O00499	513-593	SH3	\N	his6-MBP-TEVsite-SH3	PRRC2C	Q9Y520	1226-1240	PxxP_2	\N	PRAEHIPSGPLRQRE	bio ado ado-PRAEHIPSGPLRQRE	0.0378817	0.0479778	18	2	0	HU (DAPF)	Quadratic binding equation	2022.06.29.
BIN1	O00499	513-593	SH3	\N	his6-MBP-TEVsite-SH3	PRRC2C	Q9Y520	1419-1433	PxxP_3	\N	RPRRQRPTRPPRQDK	bio ado ado-RPRRQRPTRPPRQDK	0.732045	0.0186113	18	4	5.25831	HU (DAPF)	Quadratic binding equation	2022.06.29.
BIN1	O00499	513-593	SH3	\N	his6-MBP-TEVsite-SH3	PRRC2C	Q9Y520	1630-1644	PxxP_4	\N	EDPKPGPKKPKEKVD	bio ado ado-EDPKPGPKKPKEKVD	-0.0131398	0.0702621	18	2	0	HU (DAPF)	Quadratic binding equation	2022.06.29.
BIN1	O00499	513-593	SH3	\N	his6-MBP-TEVsite-SH3	PRRC2C	Q9Y520	2005-2019	PxxP_5	\N	ISKKLGPISPPQPPS	bio ado ado-ISKKLGPISPPQPPS	0.000693668	0.00887515	18	2	0	HU (DAPF)	Quadratic binding equation	2022.06.29.
BIN1	O00499	513-593	SH3	\N	his6-MBP-TEVsite-SH3	PRRC2C	Q9Y520	2877-2891	PxxP_6	\N	KPVRTGPIKPQAIKT	bio ado ado-KPVRTGPIKPQAIKT	-0.00205685	0.000976767	18	2	0	HU (DAPF)	Quadratic binding equation	2022.06.29.
BIN1	O00499	513-593	SH3	\N	his6-MBP-TEVsite-SH3	PRRC2C	Q9Y520	596-610	PxxP_7	\N	LEEKIEPREPNLEPM	bio ado ado-LEEKIEPREPNLEPM	-0.00286776	0.00826903	18	2	0	HU (DAPF)	Quadratic binding equation	2022.06.29.
BIN1	O00499	513-593	SH3	\N	his6-MBP-TEVsite-SH3	PRRC2C	Q9Y520	704-718	PxxP_8	\N	PSSSTVPPPPHRPLY	bio ado ado-PSSSTVPPPPHRPLY	-0.0186942	0.000526877	18	2	0	HU (DAPF)	Quadratic binding equation	2022.06.29.
BIN1	O00499	513-593	SH3	\N	his6-MBP-TEVsite-SH3	RB1	P06400	244-258	PxxP_1	\N	IPINGSPRTPRRGQN	bio ado ado-IPINGSPRTPRRGQN	0.0677822	0.0329927	18	2	3.61292	HU (DAPF)	Quadratic binding equation	2022.06.29.
BIN1	O00499	513-593	SH3	\N	his6-MBP-TEVsite-SH3	RB1	P06400	365-379	PxxP_2	\N	EVNVIPPHTPVRTVM	bio ado ado-EVNVIPPHTPVRTVM	-0.00963844	0.00145675	18	2	0	HU (DAPF)	Quadratic binding equation	2022.06.29.
BIN1	O00499	513-593	SH3	\N	his6-MBP-TEVsite-SH3	RB1	P06400	780-794	PxxP_3	\N	SPIPHIPRSPYKFPS	bio ado ado-SPIPHIPRSPYKFPS	0.0595166	0.0303737	18	2	3.5518	HU (DAPF)	Quadratic binding equation	2022.06.29.
BIN1	O00499	513-593	SH3	\N	his6-MBP-TEVsite-SH3	RB1	P06400	787-801	PxxP_4	\N	RSPYKFPSSPLRIPG	bio ado ado-RSPYKFPSSPLRIPG	0.0242539	0.0206186	18	2	0	HU (DAPF)	Quadratic binding equation	2022.06.29.
BIN1	O00499	513-593	SH3	\N	his6-MBP-TEVsite-SH3	RB1	P06400	862-876	PxxP_5	\N	SAEGSNPPKPLKKLR	bio ado ado-SAEGSNPPKPLKKLR	0.0762882	0.018841	18	2	3.66907	HU (DAPF)	Quadratic binding equation	2022.06.29.
BIN1	O00499	513-593	SH3	\N	his6-MBP-TEVsite-SH3	SH3KBP1	Q96B97	360-374	PxxP_1	\N	EIKKIPPERPEMLPN	bio ado ado-EIKKIPPERPEMLPN	-0.0154344	0.0345863	18	2	0	HU (DAPF)	Quadratic binding equation	2022.06.29.
BIN1	O00499	513-593	SH3	\N	his6-MBP-TEVsite-SH3	SH3KBP1	Q96B97	390-404	PxxP_2	\N	LQKPSVPAIPPKKPR	bio ado ado-LQKPSVPAIPPKKPR	0.435474	0.0144225	18	2	4.67621	HU (DAPF)	Quadratic binding equation	2022.06.29.
BIN1	O00499	513-593	SH3	\N	his6-MBP-TEVsite-SH3	SH3KBP1	Q96B97	413-427	PxxP_3	\N	RPGALPPRRPERPVG	bio ado ado-RPGALPPRRPERPVG	0.101735	0.0445933	18	2	3.80872	HU (DAPF)	Quadratic binding equation	2022.06.29.
BIN1	O00499	513-593	SH3	\N	his6-MBP-TEVsite-SH3	SMCHD1	A6NHR9	1139-1153	PxxP_1	\N	FTVRPLPDEPKHLKC	bio ado ado-FTVRPLPDEPKHLKC	0.0310279	0.017728	18	2	0	HU (DAPF)	Quadratic binding equation	2022.06.29.
BIN1	O00499	513-593	SH3	\N	his6-MBP-TEVsite-SH3	SMCHD1	A6NHR9	1977-1991	PxxP_2	\N	VETTDCPVPPKRMRR	bio ado ado-VETTDCPVPPKRMRR	0.877298	0.00555418	18	2	5.6932	HU (DAPF)	Quadratic binding equation	2022.06.29.
BIN1	O00499	513-593	SH3	\N	his6-MBP-TEVsite-SH3	SMCHD1	A6NHR9	437-451	PxxP_3	\N	ETYPDDPCFPSKLKD	bio ado ado-ETYPDDPCFPSKLKD	0.0135147	0.0196675	18	2	0	HU (DAPF)	Quadratic binding equation	2022.06.29.
BIN1	O00499	513-593	SH3	\N	his6-MBP-TEVsite-SH3	SRRM1	Q8IYB3	327-341	PxxP_1	\N	TPPRRMPPPPRHRRS	bio ado ado-TPPRRMPPPPRHRRS	0.68465	0.0211843	18	2	5.15308	HU (DAPF)	Quadratic binding equation	2022.06.29.
BIN1	O00499	513-593	SH3	\N	his6-MBP-TEVsite-SH3	SRRM1	Q8IYB3	365-379	PxxP_2	\N	SRSRSPPKKPPKRTS	bio ado ado-SRSRSPPKKPPKRTS	0.51466	0.0244815	18	4	4.82295	HU (DAPF)	Quadratic binding equation	2022.06.29.
BIN1	O00499	513-593	SH3	\N	his6-MBP-TEVsite-SH3	SRRM1	Q8IYB3	395-409	PxxP_3	\N	PRRRHRPSPPATPPP	bio ado ado-PRRRHRPSPPATPPP	0.415861	0.0349905	18	2	4.63927	HU (DAPF)	Quadratic binding equation	2022.06.29.
BIN1	O00499	513-593	SH3	\N	his6-MBP-TEVsite-SH3	SRRM1	Q8IYB3	544-558	PxxP_4	\N	GRRRRSPSPPPTRRR	bio ado ado-GRRRRSPSPPPTRRR	0.806544	0.0161411	18	2	5.45055	HU (DAPF)	Quadratic binding equation	2022.06.29.
BIN1	O00499	513-593	SH3	\N	his6-MBP-TEVsite-SH3	SRRM1	Q8IYB3	557-571	PxxP_5	\N	RRRSPSPAPPPRRRR	bio ado ado-RRRSPSPAPPPRRRR	0.90489	0.000454825	18	2	5.8206	HU (DAPF)	Quadratic binding equation	2022.06.29.
BIN1	O00499	513-593	SH3	\N	his6-MBP-TEVsite-SH3	SRRM1	Q8IYB3	567-581	PxxP_6	\N	PRRRRTPTPPPRRRT	bio ado ado-PRRRRTPTPPPRRRT	0.902219	0.00381585	18	4	5.80696	HU (DAPF)	Quadratic binding equation	2022.06.29.
BIN1	O00499	513-593	SH3	\N	his6-MBP-TEVsite-SH3	SRRM1	Q8IYB3	576-590	PxxP_7	\N	PPRRRTPSPPPRRRS	bio ado ado-PPRRRTPSPPPRRRS	0.90129	0.00181494	18	4	5.80229	HU (DAPF)	Quadratic binding equation	2022.06.29.
BIN1	O00499	513-593	SH3	\N	his6-MBP-TEVsite-SH3	SRRM1	Q8IYB3	600-614	PxxP_8	\N	IQRRYSPSPPPKRRT	bio ado ado-IQRRYSPSPPPKRRT	0.627958	0.0053727	18	4	5.03734	HU (DAPF)	Quadratic binding equation	2022.06.29.
BIN1	O00499	513-593	SH3	\N	his6-MBP-TEVsite-SH3	SRRM1	Q8IYB3	611-625	PxxP_9	\N	KRRTASPPPPPKRRA	bio ado ado-KRRTASPPPPPKRRA	0.604109	0.0073347	18	2	4.99087	HU (DAPF)	Quadratic binding equation	2022.06.29.
BIN1	O00499	513-593	SH3	\N	his6-MBP-TEVsite-SH3	SRRM1	Q8IYB3	612-626	PxxP_10	\N	RRTASPPPPPKRRAS	bio ado ado-RRTASPPPPPKRRAS	0.640636	0.0599838	18	2	5.0625	HU (DAPF)	Quadratic binding equation	2022.06.29.
BIN1	O00499	513-593	SH3	\N	his6-MBP-TEVsite-SH3	SRRM1	Q8IYB3	621-635	PxxP_11	\N	PKRRASPSPPPKRRV	bio ado ado-PKRRASPSPPPKRRV	0.628316	0.0183113	18	4	5.03804	HU (DAPF)	Quadratic binding equation	2022.06.29.
BIN1	O00499	513-593	SH3	\N	his6-MBP-TEVsite-SH3	SRRM1	Q8IYB3	759-773	PxxP_12	\N	PAAKKPPAPPSPVQS	bio ado ado-PAAKKPPAPPSPVQS	0.023624	0.0190746	18	2	0	HU (DAPF)	Quadratic binding equation	2022.06.29.
BIN1	O00499	513-593	SH3	\N	his6-MBP-TEVsite-SH3	SRRM1	Q8IYB3	776-790	PxxP_13	\N	PSTNWSPAVPVKKAK	bio ado ado-PSTNWSPAVPVKKAK	0.0563506	0.000831141	18	2	3.52629	HU (DAPF)	Quadratic binding equation	2022.06.29.
BIN1	O00499	513-593	SH3	\N	his6-MBP-TEVsite-SH3	SRRM2	Q9UQ35	1405-1419	PxxP_1	\N	PVLDAVPRTPSRERS	bio ado ado-PVLDAVPRTPSRERS	0.0416817	0.0152203	18	2	0	HU (DAPF)	Quadratic binding equation	2022.06.29.
BIN1	O00499	513-593	SH3	\N	his6-MBP-TEVsite-SH3	SRRM2	Q9UQ35	1426-1440	PxxP_2	\N	EMKDGLPRTPSRRSR	bio ado ado-EMKDGLPRTPSRRSR	0.602286	0.0346496	18	2	4.98736	HU (DAPF)	Quadratic binding equation	2022.06.29.
BIN1	O00499	513-593	SH3	\N	his6-MBP-TEVsite-SH3	SRRM2	Q9UQ35	1464-1478	PxxP_3	\N	PGMKDIPRTPSRGRS	bio ado ado-PGMKDIPRTPSRGRS	0.150644	0.0174084	18	4	4.00838	HU (DAPF)	Quadratic binding equation	2022.06.29.
BIN1	O00499	513-593	SH3	\N	his6-MBP-TEVsite-SH3	SRRM2	Q9UQ35	1484-1498	PxxP_4	\N	PEPKALPQTPRPRSR	bio ado ado-PEPKALPQTPRPRSR	0.255423	0.0261926	18	2	4.30546	HU (DAPF)	Quadratic binding equation	2022.06.29.
BIN1	O00499	513-593	SH3	\N	his6-MBP-TEVsite-SH3	SRRM2	Q9UQ35	1653-1667	PxxP_5	\N	SSTESSPEHPPKSRT	bio ado ado-SSTESSPEHPPKSRT	0.0155425	0.0389506	18	2	0	HU (DAPF)	Quadratic binding equation	2022.06.29.
BIN1	O00499	513-593	SH3	\N	his6-MBP-TEVsite-SH3	SRRM2	Q9UQ35	2029-2043	PxxP_6	\N	RSRSRTPLLPRKRSR	bio ado ado-RSRSRTPLLPRKRSR	0.715906	0.0413977	18	2	5.22137	HU (DAPF)	Quadratic binding equation	2022.06.29.
BIN1	O00499	513-593	SH3	\N	his6-MBP-TEVsite-SH3	SRRM2	Q9UQ35	2405-2419	PxxP_7	\N	ARSRTPPSAPSQSRM	bio ado ado-ARSRTPPSAPSQSRM	0.0184635	0.00302414	18	2	0	HU (DAPF)	Quadratic binding equation	2022.06.29.
BIN1	O00499	513-593	SH3	\N	his6-MBP-TEVsite-SH3	SRRM2	Q9UQ35	2656-2670	PxxP_8	\N	PQALPKPASPKKPPP	bio ado ado-PQALPKPASPKKPPP	0.038684	0.00588097	18	2	0	HU (DAPF)	Quadratic binding equation	2022.06.29.
BIN1	O00499	513-593	SH3	\N	his6-MBP-TEVsite-SH3	SRRM2	Q9UQ35	400-414	PxxP_9	\N	TRDRSPPKSPEKLPQ	bio ado ado-TRDRSPPKSPEKLPQ	0.0144363	0.0227475	18	4	0	HU (DAPF)	Quadratic binding equation	2022.06.29.
BIN1	O00499	513-593	SH3	\N	his6-MBP-TEVsite-SH3	SRRM2	Q9UQ35	975-989	PxxP_10	\N	PDTKVKPETPPRQSH	bio ado ado-PDTKVKPETPPRQSH	0.195337	0.0234098	18	4	4.14917	HU (DAPF)	Quadratic binding equation	2022.06.29.
BIN1	O00499	513-593	SH3	\N	his6-MBP-TEVsite-SH3	SUB1	P53999	27-41	PxxP_1	\N	RKKQVAPEKPVKKQK	bio ado ado-RKKQVAPEKPVKKQK	0.122586	0.0534814	18	2	3.90196	HU (DAPF)	Quadratic binding equation	2022.06.29.
BIN1	O00499	513-593	SH3	\N	his6-MBP-TEVsite-SH3	TTF2	Q9UNY4	401-415	PxxP_1	\N	VSKKVEPSDPVARRV	bio ado ado-VSKKVEPSDPVARRV	-0.00939685	0.0195587	18	2	0	HU (DAPF)	Quadratic binding equation	2022.06.29.
BIN1	O00499	513-593	SH3	\N	his6-MBP-TEVsite-SH3	TUBGCP2	Q9BSJ2	876-890	PxxP_1	\N	RSQKATPQVPVLRGP	bio ado ado-RSQKATPQVPVLRGP	0.0244954	0.00869012	18	2	0	HU (DAPF)	Quadratic binding equation	2022.06.29.
BIN1	O00499	513-593	SH3	\N	his6-MBP-TEVsite-SH3	ZC3H14	Q6PJT7	329-343	PxxP_1	\N	SSSVSVPAKPERRPS	bio ado ado-SSSVSVPAKPERRPS	0.125955	0.0109872	18	2	3.91574	HU (DAPF)	Quadratic binding equation	2022.06.29.
BIN1	O00499	513-593	SH3	T532M	his6-MBP-TEVsite-SH3	ACAP1	Q15027	534-548	PxxP_1	\N	GRPRGQPPVPPKPSI	bio ado ado-GRPRGQPPVPPKPSI	0.0687663	0.0201446	18	4	3.61973	HU (DAPF)	Quadratic binding equation	2022.06.29.
BIN1	O00499	513-593	SH3	T532M	his6-MBP-TEVsite-SH3	ACAP1	Q15027	553-567	PxxP_2	\N	GSLRSKPEPPSEDLG	bio ado ado-GSLRSKPEPPSEDLG	-0.0258837	0.0284424	18	2	0	HU (DAPF)	Quadratic binding equation	2022.06.29.
BIN1	O00499	513-593	SH3	T532M	his6-MBP-TEVsite-SH3	ARHGAP17	Q68EM7	632-646	PxxP_1	\N	AVKKPAPAPPKPGNP	bio ado ado-AVKKPAPAPPKPGNP	0.000411335	0.00784003	18	2	0	HU (DAPF)	Quadratic binding equation	2022.06.29.
BIN1	O00499	513-593	SH3	T532M	his6-MBP-TEVsite-SH3	ARHGAP17	Q68EM7	662-676	PxxP_2	\N	HPPSLSPKPPTRSPS	bio ado ado-HPPSLSPKPPTRSPS	0.100466	0.0317652	18	2	3.80254	HU (DAPF)	Quadratic binding equation	2022.06.29.
BIN1	O00499	513-593	SH3	T532M	his6-MBP-TEVsite-SH3	ARHGAP17	Q68EM7	765-779	PxxP_3	\N	PLGKQNPSLPAPQTL	bio ado ado-PLGKQNPSLPAPQTL	0.0255493	0.00598553	18	2	0	HU (DAPF)	Quadratic binding equation	2022.06.29.
BIN1	O00499	513-593	SH3	T532M	his6-MBP-TEVsite-SH3	ARHGAP17	Q68EM7	801-815	PxxP_4	\N	PKPRNRPSVPPPPQP	bio ado ado-PKPRNRPSVPPPPQP	0.0223521	0.0376438	18	2	0	HU (DAPF)	Quadratic binding equation	2022.06.29.
BIN1	O00499	513-593	SH3	T532M	his6-MBP-TEVsite-SH3	ARHGAP45	Q92619	1106-1120	PxxP_1	\N	NNVLQAPLPPMRLRG	bio ado ado-NNVLQAPLPPMRLRG	0.480627	0.0199171	18	2	4.76011	HU (DAPF)	Quadratic binding equation	2022.06.29.
BIN1	O00499	513-593	SH3	T532M	his6-MBP-TEVsite-SH3	ARHGAP45	Q92619	681-695	PxxP_2	\N	ELPVAVPSGPFRHEG	bio ado ado-ELPVAVPSGPFRHEG	-0.0181215	0.0336696	18	2	0	HU (DAPF)	Quadratic binding equation	2022.06.29.
BIN1	O00499	513-593	SH3	T532M	his6-MBP-TEVsite-SH3	BUD13	Q9BRD0	194-208	PxxP_1	\N	RHDSPDPSPPRRPQH	bio ado ado-RHDSPDPSPPRRPQH	0.0194247	0.0421287	18	2	0	HU (DAPF)	Quadratic binding equation	2022.06.29.
BIN1	O00499	513-593	SH3	T532M	his6-MBP-TEVsite-SH3	BUD13	Q9BRD0	219-233	PxxP_2	\N	RHDSPDPSPPRRARH	bio ado ado-RHDSPDPSPPRRARH	0.430141	0.0386921	18	2	4.6662	HU (DAPF)	Quadratic binding equation	2022.06.29.
BIN1	O00499	513-593	SH3	T532M	his6-MBP-TEVsite-SH3	C1orf122	Q6ZSJ8	25-39	PxxP_1	\N	GLGGRPPPQPPREER	bio ado ado-GLGGRPPPQPPREER	-0.0247057	0.0282184	18	2	0	HU (DAPF)	Quadratic binding equation	2022.06.29.
BIN1	O00499	513-593	SH3	T532M	his6-MBP-TEVsite-SH3	C1orf122	Q6ZSJ8	26-40	PxxP_2	\N	LGGRPPPQPPREERA	bio ado ado-LGGRPPPQPPREERA	-0.0230005	0.0557943	18	2	0	HU (DAPF)	Quadratic binding equation	2022.06.29.
BIN1	O00499	513-593	SH3	T532M	his6-MBP-TEVsite-SH3	CBL	P22681	488-502	PxxP_1	\N	APQASLPPVPPRLDL	bio ado ado-APQASLPPVPPRLDL	-0.0016739	0.00412256	18	2	0	HU (DAPF)	Quadratic binding equation	2022.06.29.
BIN1	O00499	513-593	SH3	T532M	his6-MBP-TEVsite-SH3	CBL	P22681	528-542	PxxP_2	\N	HKDKPLPVPPTLRDL	bio ado ado-HKDKPLPVPPTLRDL	0.0125452	0.0052642	18	2	0	HU (DAPF)	Quadratic binding equation	2022.06.29.
BIN1	O00499	513-593	SH3	T532M	his6-MBP-TEVsite-SH3	CBL	P22681	537-551	PxxP_3	\N	PTLRDLPPPPPPDRP	bio ado ado-PTLRDLPPPPPPDRP	-0.00782512	0.00375998	18	2	0	HU (DAPF)	Quadratic binding equation	2022.06.29.
BIN1	O00499	513-593	SH3	T532M	his6-MBP-TEVsite-SH3	CBL	P22681	539-553	PxxP_4	\N	LRDLPPPPPPDRPYS	bio ado ado-LRDLPPPPPPDRPYS	-0.0281944	0.0266155	18	2	0	HU (DAPF)	Quadratic binding equation	2022.06.29.
BIN1	O00499	513-593	SH3	T532M	his6-MBP-TEVsite-SH3	CBL	P22681	560-574	PxxP_5	\N	PQRRPLPCTPGDCPS	bio ado ado-PQRRPLPCTPGDCPS	-0.0521756	0.0354276	18	2	0	HU (DAPF)	Quadratic binding equation	2022.06.29.
BIN1	O00499	513-593	SH3	T532M	his6-MBP-TEVsite-SH3	CBL	P22681	590-604	PxxP_6	\N	WLPRPIPKVPVSAPS	bio ado ado-WLPRPIPKVPVSAPS	-0.00576347	0.0635078	18	2	0	HU (DAPF)	Quadratic binding equation	2022.06.29.
BIN1	O00499	513-593	SH3	T532M	his6-MBP-TEVsite-SH3	CBL	P22681	814-828	PxxP_7	\N	TEGSQVPERPPKPFP	bio ado ado-TEGSQVPERPPKPFP	0.0128238	0.0111683	18	2	0	HU (DAPF)	Quadratic binding equation	2022.06.29.
BIN1	O00499	513-593	SH3	T532M	his6-MBP-TEVsite-SH3	CDC27	P30260	396-410	PxxP_1	\N	LKMKFPPKIPNRKTK	bio ado ado-LKMKFPPKIPNRKTK	0.767803	0.0147591	18	4	5.34537	HU (DAPF)	Quadratic binding equation	2022.06.29.
BIN1	O00499	513-593	SH3	T532M	his6-MBP-TEVsite-SH3	DDX42	Q86XP3	183-197	PxxP_1	\N	YDSDGNPIAPTKKII	bio ado ado-YDSDGNPIAPTKKII	-0.0181499	0.0514773	18	2	0	HU (DAPF)	Quadratic binding equation	2022.06.29.
BIN1	O00499	513-593	SH3	T532M	his6-MBP-TEVsite-SH3	DDX42	Q86XP3	23-37	PxxP_2	\N	AGKKEEPKLPQQSHS	bio ado ado-AGKKEEPKLPQQSHS	-0.00847394	0.0082127	18	2	0	HU (DAPF)	Quadratic binding equation	2022.06.29.
BIN1	O00499	513-593	SH3	T532M	his6-MBP-TEVsite-SH3	DDX42	Q86XP3	920-934	PxxP_3	\N	ADGFAVPEPPKRKKS	bio ado ado-ADGFAVPEPPKRKKS	0.654072	0.0223493	18	2	5.08958	HU (DAPF)	Quadratic binding equation	2022.06.29.
BIN1	O00499	513-593	SH3	T532M	his6-MBP-TEVsite-SH3	DMBT1	Q9UGM3	215-229	PxxP_1	\N	WPVRISPPVPTEGSE	bio ado ado-WPVRISPPVPTEGSE	-0.0488332	0.0519549	18	2	0	HU (DAPF)	Quadratic binding equation	2022.06.29.
BIN1	O00499	513-593	SH3	T532M	his6-MBP-TEVsite-SH3	DNM2	P50570	313-327	PxxP_1	\N	EYKNFRPDDPTRKTK	bio ado ado-EYKNFRPDDPTRKTK	-0.0172915	0.0166995	18	2	0	HU (DAPF)	Quadratic binding equation	2022.06.29.
BIN1	O00499	513-593	SH3	T532M	his6-MBP-TEVsite-SH3	DNM2	P50570	801-815	PxxP_2	\N	AASFSAPPIPSRPGP	bio ado ado-AASFSAPPIPSRPGP	0.0112743	0.00100252	18	2	0	HU (DAPF)	Quadratic binding equation	2022.06.29.
BIN1	O00499	513-593	SH3	T532M	his6-MBP-TEVsite-SH3	DNM2	P50570	823-837	PxxP_3	\N	DLFPAPPQIPSRPVR	bio ado ado-DLFPAPPQIPSRPVR	0.128306	0.0469168	18	2	3.92517	HU (DAPF)	Quadratic binding equation	2022.06.29.
BIN1	O00499	513-593	SH3	T532M	his6-MBP-TEVsite-SH3	DNM2	P50570	826-840	PxxP_4	\N	PAPPQIPSRPVRIPP	bio ado ado-PAPPQIPSRPVRIPP	0.108585	0.0102387	18	2	3.84103	HU (DAPF)	Quadratic binding equation	2022.06.29.
BIN1	O00499	513-593	SH3	T532M	his6-MBP-TEVsite-SH3	DNM2	P50570	834-848	PxxP_5	\N	RPVRIPPGIPPGVPS	bio ado ado-RPVRIPPGIPPGVPS	0.0449561	0.00432249	18	2	0	HU (DAPF)	Quadratic binding equation	2022.06.29.
BIN1	O00499	513-593	SH3	T532M	his6-MBP-TEVsite-SH3	DNM2	P50570	838-852	PxxP_6	\N	IPPGIPPGVPSRRPP	bio ado ado-IPPGIPPGVPSRRPP	0.0976938	0.000771238	18	2	3.78877	HU (DAPF)	Quadratic binding equation	2022.06.29.
BIN1	O00499	513-593	SH3	T532M	his6-MBP-TEVsite-SH3	DNM2	P50570	846-860	PxxP_7	\N	VPSRRPPAAPSRPTI	bio ado ado-VPSRRPPAAPSRPTI	0.0262571	0.0619304	18	4	0	HU (DAPF)	Quadratic binding equation	2022.06.29.
BIN1	O00499	513-593	SH3	T532M	his6-MBP-TEVsite-SH3	DNMT1	P26358	129-143	PxxP_1	\N	PKPLSKPRTPRRSKS	bio ado ado-PKPLSKPRTPRRSKS	0.566334	0.0352045	18	2	4.91906	HU (DAPF)	Quadratic binding equation	2022.06.29.
BIN1	O00499	513-593	SH3	T532M	his6-MBP-TEVsite-SH3	DNMT1	P26358	323-337	PxxP_2	\N	KRRKTTPKEPTEKKM	bio ado ado-KRRKTTPKEPTEKKM	0.0492911	0.00717583	18	2	0	HU (DAPF)	Quadratic binding equation	2022.06.29.
BIN1	O00499	513-593	SH3	T532M	his6-MBP-TEVsite-SH3	EZH2	Q15910	341-355	PxxP_1	\N	ERIKTPPKRPGGRRR	bio ado ado-ERIKTPPKRPGGRRR	0.362186	0.0103586	18	2	4.53541	HU (DAPF)	Quadratic binding equation	2022.06.29.
BIN1	O00499	513-593	SH3	T532M	his6-MBP-TEVsite-SH3	G3BP1	Q13283	288-302	PxxP_1	\N	PESQIPPQRPQRDQR	bio ado ado-PESQIPPQRPQRDQR	0.0935401	0.0224151	18	2	3.7675	HU (DAPF)	Quadratic binding equation	2022.06.29.
BIN1	O00499	513-593	SH3	T532M	his6-MBP-TEVsite-SH3	HDGFL2	Q7Z4V5	288-302	PxxP_1	\N	RGRKPKPERPPSSSS	bio ado ado-RGRKPKPERPPSSSS	0.065014	0.0517085	18	2	3.59325	HU (DAPF)	Quadratic binding equation	2022.06.29.
BIN1	O00499	513-593	SH3	T532M	his6-MBP-TEVsite-SH3	HIRIP3	Q9BW71	531-545	PxxP_1	\N	DEERPRPAPPDWSHM	bio ado ado-DEERPRPAPPDWSHM	0.00702817	0.00860399	18	2	0	HU (DAPF)	Quadratic binding equation	2022.06.29.
BIN1	O00499	513-593	SH3	T532M	his6-MBP-TEVsite-SH3	HMGA1	P17096	28-42	PxxP_1	\N	RPRKQPPVSPGTALV	bio ado ado-RPRKQPPVSPGTALV	0.0503958	0.0850714	18	2	3.47447	HU (DAPF)	Quadratic binding equation	2022.06.29.
BIN1	O00499	513-593	SH3	T532M	his6-MBP-TEVsite-SH3	HNRNPK	P61978	266-280	PxxP_1	\N	PGRGGRPMPPSRRDY	bio ado ado-PGRGGRPMPPSRRDY	0.376857	0.00289051	18	2	4.5643	HU (DAPF)	Quadratic binding equation	2022.06.29.
BIN1	O00499	513-593	SH3	T532M	his6-MBP-TEVsite-SH3	HNRNPK	P61978	283-297	PxxP_2	\N	MSPRRGPPPPPPGRG	bio ado ado-MSPRRGPPPPPPGRG	0.169476	0.00911465	18	2	4.07115	HU (DAPF)	Quadratic binding equation	2022.06.29.
BIN1	O00499	513-593	SH3	T532M	his6-MBP-TEVsite-SH3	HNRNPK	P61978	284-298	PxxP_3	\N	SPRRGPPPPPPGRGG	bio ado ado-SPRRGPPPPPPGRGG	0.251839	0.0194002	18	2	4.29687	HU (DAPF)	Quadratic binding equation	2022.06.29.
BIN1	O00499	513-593	SH3	T532M	his6-MBP-TEVsite-SH3	HNRNPK	P61978	285-299	PxxP_4	\N	PRRGPPPPPPGRGGR	bio ado ado-PRRGPPPPPPGRGGR	0.349534	0.0317107	18	2	4.51011	HU (DAPF)	Quadratic binding equation	2022.06.29.
BIN1	O00499	513-593	SH3	T532M	his6-MBP-TEVsite-SH3	HNRNPK	P61978	302-316	PxxP_5	\N	SRARNLPLPPPPPPR	bio ado ado-SRARNLPLPPPPPPR	0.370722	0.00666625	18	2	4.55227	HU (DAPF)	Quadratic binding equation	2022.06.29.
BIN1	O00499	513-593	SH3	T532M	his6-MBP-TEVsite-SH3	HNRNPK	P61978	305-319	PxxP_6	\N	RNLPLPPPPPPRGGD	bio ado ado-RNLPLPPPPPPRGGD	0.0976191	0.0112396	18	2	3.7884	HU (DAPF)	Quadratic binding equation	2022.06.29.
BIN1	O00499	513-593	SH3	T532M	his6-MBP-TEVsite-SH3	IRF2BP1	Q8IU81	361-375	PxxP_1	\N	ALCGPPPRAPSRNLA	bio ado ado-ALCGPPPRAPSRNLA	0.109476	0.00836526	18	2	3.8451	HU (DAPF)	Quadratic binding equation	2022.06.29.
BIN1	O00499	513-593	SH3	T532M	his6-MBP-TEVsite-SH3	KHDRBS1	Q07666	32-46	PxxP_1	\N	QTPSRQPPLPHRSRG	bio ado ado-QTPSRQPPLPHRSRG	0.206055	0.0358122	18	2	4.17928	HU (DAPF)	Quadratic binding equation	2022.06.29.
BIN1	O00499	513-593	SH3	T532M	his6-MBP-TEVsite-SH3	KHDRBS1	Q07666	328-342	PxxP_2	\N	TVTRGVPPPPTVRGA	bio ado ado-TVTRGVPPPPTVRGA	0.00707583	0.0392976	18	2	0	HU (DAPF)	Quadratic binding equation	2022.06.29.
BIN1	O00499	513-593	SH3	T532M	his6-MBP-TEVsite-SH3	KHDRBS1	Q07666	421-435	PxxP_3	\N	PSLKAPPARPVKGAY	bio ado ado-PSLKAPPARPVKGAY	0.0220599	0.0372812	18	4	0	HU (DAPF)	Quadratic binding equation	2022.06.29.
BIN1	O00499	513-593	SH3	T532M	his6-MBP-TEVsite-SH3	MKI67	P46013	1083-1097	PxxP_1	\N	TGMKKWPRTPKEEAQ	bio ado ado-TGMKKWPRTPKEEAQ	-0.0345267	0.0484568	18	2	0	HU (DAPF)	Quadratic binding equation	2022.06.29.
BIN1	O00499	513-593	SH3	T532M	his6-MBP-TEVsite-SH3	MKI67	P46013	1327-1341	PxxP_2	\N	TGSKRRPQTPKEEAQ	bio ado ado-TGSKRRPQTPKEEAQ	-0.0403698	0.036383	18	2	0	HU (DAPF)	Quadratic binding equation	2022.06.29.
BIN1	O00499	513-593	SH3	T532M	his6-MBP-TEVsite-SH3	MKI67	P46013	1385-1399	PxxP_3	\N	TSTRRQPKTPLEKRD	bio ado ado-TSTRRQPKTPLEKRD	0.0280139	0.0271951	18	2	0	HU (DAPF)	Quadratic binding equation	2022.06.29.
BIN1	O00499	513-593	SH3	T532M	his6-MBP-TEVsite-SH3	MKI67	P46013	1935-1949	PxxP_4	\N	PGSKRRPQTPKEKAK	bio ado ado-PGSKRRPQTPKEKAK	0.0443407	0.0126671	18	2	0	HU (DAPF)	Quadratic binding equation	2022.06.29.
BIN1	O00499	513-593	SH3	T532M	his6-MBP-TEVsite-SH3	MKI67	P46013	2115-2129	PxxP_5	\N	TSTRRRPKTPLGKRD	bio ado ado-TSTRRRPKTPLGKRD	0.112027	0.00387484	18	2	3.8566	HU (DAPF)	Quadratic binding equation	2022.06.29.
BIN1	O00499	513-593	SH3	T532M	his6-MBP-TEVsite-SH3	MKI67	P46013	2175-2189	PxxP_6	\N	TGSKRQPRTPKGKAQ	bio ado ado-TGSKRQPRTPKGKAQ	0.0238121	0.0103111	18	2	0	HU (DAPF)	Quadratic binding equation	2022.06.29.
BIN1	O00499	513-593	SH3	T532M	his6-MBP-TEVsite-SH3	MKI67	P46013	2297-2311	PxxP_7	\N	PGSKRWPQTPKEKAQ	bio ado ado-PGSKRWPQTPKEKAQ	-0.0208078	0.0198338	18	2	0	HU (DAPF)	Quadratic binding equation	2022.06.29.
BIN1	O00499	513-593	SH3	T532M	his6-MBP-TEVsite-SH3	MKI67	P46013	2418-2432	PxxP_8	\N	PGSKRQPQTPKEKAE	bio ado ado-PGSKRQPQTPKEKAE	-0.0479395	0.0444633	18	2	0	HU (DAPF)	Quadratic binding equation	2022.06.29.
BIN1	O00499	513-593	SH3	T532M	his6-MBP-TEVsite-SH3	MKI67	P46013	2660-2674	PxxP_9	\N	EPSRRRPRAPKEKAQ	bio ado ado-EPSRRRPRAPKEKAQ	0.0279925	0.0431418	18	2	0	HU (DAPF)	Quadratic binding equation	2022.06.29.
BIN1	O00499	513-593	SH3	T532M	his6-MBP-TEVsite-SH3	MKI67	P46013	2781-2795	PxxP_10	\N	TGSRRRPRAPRESAQ	bio ado ado-TGSRRRPRAPRESAQ	0.0816091	0.0192204	18	2	3.70139	HU (DAPF)	Quadratic binding equation	2022.06.29.
BIN1	O00499	513-593	SH3	T532M	his6-MBP-TEVsite-SH3	MKI67	P46013	2899-2913	PxxP_11	\N	IGSRRQPRAPKEKAQ	bio ado ado-IGSRRQPRAPKEKAQ	0.00974929	0.040991	18	2	0	HU (DAPF)	Quadratic binding equation	2022.06.29.
BIN1	O00499	513-593	SH3	T532M	his6-MBP-TEVsite-SH3	MKI67	P46013	2986-3000	PxxP_12	\N	KSNTSLPPLPFKRGG	bio ado ado-KSNTSLPPLPFKRGG	0.177532	0.00378091	18	2	4.09636	HU (DAPF)	Quadratic binding equation	2022.06.29.
BIN1	O00499	513-593	SH3	T532M	his6-MBP-TEVsite-SH3	MKI67	P46013	517-531	PxxP_13	\N	FDENLPPNTPLKRGE	bio ado ado-FDENLPPNTPLKRGE	-0.057688	0.0532408	18	2	0	HU (DAPF)	Quadratic binding equation	2022.06.29.
BIN1	O00499	513-593	SH3	T532M	his6-MBP-TEVsite-SH3	MKI67	P46013	686-700	PxxP_14	\N	NKRQRRPATPKKPVG	bio ado ado-NKRQRRPATPKKPVG	0.127565	0.0409725	18	2	3.92221	HU (DAPF)	Quadratic binding equation	2022.06.29.
BIN1	O00499	513-593	SH3	T532M	his6-MBP-TEVsite-SH3	MUC5AC	P98088	1311-1325	PxxP_1	\N	IERRVYPCSPTTPVP	bio ado ado-IERRVYPCSPTTPVP	0.00370313	0.00726564	18	2	0	HU (DAPF)	Quadratic binding equation	2022.06.29.
BIN1	O00499	513-593	SH3	T532M	his6-MBP-TEVsite-SH3	MUC5AC	P98088	1563-1577	PxxP_2	\N	VSSKPTPTEPSTSSC	bio ado ado-VSSKPTPTEPSTSSC	0.00823016	0.0644424	18	2	0	HU (DAPF)	Quadratic binding equation	2022.06.29.
BIN1	O00499	513-593	SH3	T532M	his6-MBP-TEVsite-SH3	MUC5AC	P98088	1936-1950	PxxP_3	\N	VSSKPTPTEPSTSSC	bio ado ado-VSSKPTPTEPSTSSC	0.0066408	0.0352529	18	2	0	HU (DAPF)	Quadratic binding equation	2022.06.29.
BIN1	O00499	513-593	SH3	T532M	his6-MBP-TEVsite-SH3	MUC5AC	P98088	5643-5657	PxxP_4	\N	SWERGVPVSPMH---	bio ado ado-SWERGVPVSPMH---	-0.041987	0.11246	18	2	0	HU (DAPF)	Quadratic binding equation	2022.06.29.
BIN1	O00499	513-593	SH3	T532M	his6-MBP-TEVsite-SH3	NOLC1	Q14978	193-207	PxxP_1	\N	KAQTKAPPKPARAAP	bio ado ado-KAQTKAPPKPARAAP	0.0748303	0.0302603	18	2	3.65987	HU (DAPF)	Quadratic binding equation	2022.06.29.
BIN1	O00499	513-593	SH3	T532M	his6-MBP-TEVsite-SH3	PKN1	Q16512	565-579	PxxP_1	\N	KSSRDPPSSPSSLSS	bio ado ado-KSSRDPPSSPSSLSS	0.000787157	0.00818866	18	2	0	HU (DAPF)	Quadratic binding equation	2022.06.29.
BIN1	O00499	513-593	SH3	T532M	his6-MBP-TEVsite-SH3	PPP1R12A	O14974	401-415	PxxP_1	\N	SSGQATPTSPIKKFP	bio ado ado-SSGQATPTSPIKKFP	0.036133	0.0137876	18	2	0	HU (DAPF)	Quadratic binding equation	2022.06.29.
BIN1	O00499	513-593	SH3	T532M	his6-MBP-TEVsite-SH3	PPP1R12A	O14974	493-507	PxxP_2	\N	RLAYVAPTIPRRLAS	bio ado ado-RLAYVAPTIPRRLAS	0.196994	0.0252601	18	2	4.1539	HU (DAPF)	Quadratic binding equation	2022.06.29.
BIN1	O00499	513-593	SH3	T532M	his6-MBP-TEVsite-SH3	PRRC2A	P48634	1192-1206	PxxP_1	\N	LAPKKPPTGPLPPSK	bio ado ado-LAPKKPPTGPLPPSK	0.000363392	0.0025392	18	2	0	HU (DAPF)	Quadratic binding equation	2022.06.29.
BIN1	O00499	513-593	SH3	T532M	his6-MBP-TEVsite-SH3	PRRC2A	P48634	1195-1209	PxxP_2	\N	KKPPTGPLPPSKEPL	bio ado ado-KKPPTGPLPPSKEPL	0.0067645	0.0173378	18	2	0	HU (DAPF)	Quadratic binding equation	2022.06.29.
BIN1	O00499	513-593	SH3	T532M	his6-MBP-TEVsite-SH3	PRRC2A	P48634	120-134	PxxP_3	\N	NQPKRPPAAPENTPL	bio ado ado-NQPKRPPAAPENTPL	0.0110238	0.00335416	18	2	0	HU (DAPF)	Quadratic binding equation	2022.06.29.
BIN1	O00499	513-593	SH3	T532M	his6-MBP-TEVsite-SH3	PRRC2A	P48634	1495-1509	PxxP_4	\N	GHPRHKPGLPQAPQG	bio ado ado-GHPRHKPGLPQAPQG	-0.0383312	0.110424	18	2	0	HU (DAPF)	Quadratic binding equation	2022.06.29.
BIN1	O00499	513-593	SH3	T532M	his6-MBP-TEVsite-SH3	PRRC2A	P48634	1506-1520	PxxP_5	\N	APQGPSPRPPTRYEP	bio ado ado-APQGPSPRPPTRYEP	-0.0104391	0.000488051	18	2	0	HU (DAPF)	Quadratic binding equation	2022.06.29.
BIN1	O00499	513-593	SH3	T532M	his6-MBP-TEVsite-SH3	PRRC2A	P48634	1549-1563	PxxP_6	\N	DSAGVSPFPPKRRER	bio ado ado-DSAGVSPFPPKRRER	0.530766	0.00414199	18	2	4.85275	HU (DAPF)	Quadratic binding equation	2022.06.29.
BIN1	O00499	513-593	SH3	T532M	his6-MBP-TEVsite-SH3	PRRC2A	P48634	1705-1719	PxxP_7	\N	EPPRRPPPAPHDGDR	bio ado ado-EPPRRPPPAPHDGDR	-0.0455783	0.106626	18	2	0	HU (DAPF)	Quadratic binding equation	2022.06.29.
BIN1	O00499	513-593	SH3	T532M	his6-MBP-TEVsite-SH3	PRRC2A	P48634	1721-1735	PxxP_8	\N	ELPREQPLPPGPIGT	bio ado ado-ELPREQPLPPGPIGT	-0.00580194	0.0111099	18	2	0	HU (DAPF)	Quadratic binding equation	2022.06.29.
BIN1	O00499	513-593	SH3	T532M	his6-MBP-TEVsite-SH3	PRRC2A	P48634	261-275	PxxP_9	\N	FPPPYGPQGPYRYPT	bio ado ado-FPPPYGPQGPYRYPT	-0.0124395	0.0145516	18	2	0	HU (DAPF)	Quadratic binding equation	2022.06.29.
BIN1	O00499	513-593	SH3	T532M	his6-MBP-TEVsite-SH3	PRRC2A	P48634	270-284	PxxP_10	\N	PYRYPTPDGPSRFPR	bio ado ado-PYRYPTPDGPSRFPR	0.0265704	0.0112951	18	2	0	HU (DAPF)	Quadratic binding equation	2022.06.29.
BIN1	O00499	513-593	SH3	T532M	his6-MBP-TEVsite-SH3	PRRC2A	P48634	502-516	PxxP_11	\N	KRLKAEPAAPPAAPS	bio ado ado-KRLKAEPAAPPAAPS	-0.0251923	0.000401087	18	2	0	HU (DAPF)	Quadratic binding equation	2022.06.29.
BIN1	O00499	513-593	SH3	T532M	his6-MBP-TEVsite-SH3	PRRC2A	P48634	523-537	PxxP_12	\N	AVPKELPAPPAPPPA	bio ado ado-AVPKELPAPPAPPPA	-0.020425	0.0840559	18	2	0	HU (DAPF)	Quadratic binding equation	2022.06.29.
BIN1	O00499	513-593	SH3	T532M	his6-MBP-TEVsite-SH3	PRRC2A	P48634	585-599	PxxP_13	\N	EASPVEPQLPSKEGP	bio ado ado-EASPVEPQLPSKEGP	0.00277208	0.0396992	18	2	0	HU (DAPF)	Quadratic binding equation	2022.06.29.
BIN1	O00499	513-593	SH3	T532M	his6-MBP-TEVsite-SH3	PRRC2A	P48634	593-607	PxxP_14	\N	LPSKEGPEPPEEVPP	bio ado ado-LPSKEGPEPPEEVPP	-0.00322017	0.00511228	18	2	0	HU (DAPF)	Quadratic binding equation	2022.06.29.
BIN1	O00499	513-593	SH3	T532M	his6-MBP-TEVsite-SH3	PRRC2A	P48634	690-704	PxxP_15	\N	VPAPQAPPPPPKALY	bio ado ado-VPAPQAPPPPPKALY	-0.00754757	0.00306892	18	2	0	HU (DAPF)	Quadratic binding equation	2022.06.29.
BIN1	O00499	513-593	SH3	T532M	his6-MBP-TEVsite-SH3	PRRC2A	P48634	707-721	PxxP_16	\N	ALGRPPPMPPMNFDP	bio ado ado-ALGRPPPMPPMNFDP	-0.041577	0.0558279	18	2	0	HU (DAPF)	Quadratic binding equation	2022.06.29.
BIN1	O00499	513-593	SH3	T532M	his6-MBP-TEVsite-SH3	PRRC2A	P48634	859-873	PxxP_17	\N	PGPRPLPWPPGSDEV	bio ado ado-PGPRPLPWPPGSDEV	-0.0117873	0.0572686	18	2	0	HU (DAPF)	Quadratic binding equation	2022.06.29.
BIN1	O00499	513-593	SH3	T532M	his6-MBP-TEVsite-SH3	PRRC2A	P48634	907-921	PxxP_18	\N	GSGGQGPPPPRRESR	bio ado ado-GSGGQGPPPPRRESR	0.104299	0.0190004	18	2	3.82103	HU (DAPF)	Quadratic binding equation	2022.06.29.
BIN1	O00499	513-593	SH3	T532M	his6-MBP-TEVsite-SH3	PRRC2A	P48634	936-950	PxxP_19	\N	GIPPEEPGAPPRRAG	bio ado ado-GIPPEEPGAPPRRAG	0.0293273	0.0171291	18	2	0	HU (DAPF)	Quadratic binding equation	2022.06.29.
BIN1	O00499	513-593	SH3	T532M	his6-MBP-TEVsite-SH3	PRRC2A	P48634	949-963	PxxP_20	\N	AGPIKKPPPPTKVEE	bio ado ado-AGPIKKPPPPTKVEE	-0.035562	0.0173382	18	2	0	HU (DAPF)	Quadratic binding equation	2022.06.29.
BIN1	O00499	513-593	SH3	T532M	his6-MBP-TEVsite-SH3	PRRC2C	Q9Y520	1053-1067	PxxP_1	\N	TEKKDLPPPPPPPQP	bio ado ado-TEKKDLPPPPPPPQP	-0.0361002	0.0181006	18	2	0	HU (DAPF)	Quadratic binding equation	2022.06.29.
BIN1	O00499	513-593	SH3	T532M	his6-MBP-TEVsite-SH3	PRRC2C	Q9Y520	1226-1240	PxxP_2	\N	PRAEHIPSGPLRQRE	bio ado ado-PRAEHIPSGPLRQRE	-0.0181966	0.0315479	18	2	0	HU (DAPF)	Quadratic binding equation	2022.06.29.
BIN1	O00499	513-593	SH3	T532M	his6-MBP-TEVsite-SH3	PRRC2C	Q9Y520	1419-1433	PxxP_3	\N	RPRRQRPTRPPRQDK	bio ado ado-RPRRQRPTRPPRQDK	0.69664	0.0121562	18	4	5.17882	HU (DAPF)	Quadratic binding equation	2022.06.29.
BIN1	O00499	513-593	SH3	T532M	his6-MBP-TEVsite-SH3	PRRC2C	Q9Y520	1630-1644	PxxP_4	\N	EDPKPGPKKPKEKVD	bio ado ado-EDPKPGPKKPKEKVD	-0.00235386	0.0298908	18	2	0	HU (DAPF)	Quadratic binding equation	2022.06.29.
BIN1	O00499	513-593	SH3	T532M	his6-MBP-TEVsite-SH3	PRRC2C	Q9Y520	2005-2019	PxxP_5	\N	ISKKLGPISPPQPPS	bio ado ado-ISKKLGPISPPQPPS	0.00531138	0.0342535	18	2	0	HU (DAPF)	Quadratic binding equation	2022.06.29.
BIN1	O00499	513-593	SH3	T532M	his6-MBP-TEVsite-SH3	PRRC2C	Q9Y520	2877-2891	PxxP_6	\N	KPVRTGPIKPQAIKT	bio ado ado-KPVRTGPIKPQAIKT	0.0103901	0.00981293	18	2	0	HU (DAPF)	Quadratic binding equation	2022.06.29.
BIN1	O00499	513-593	SH3	T532M	his6-MBP-TEVsite-SH3	PRRC2C	Q9Y520	596-610	PxxP_7	\N	LEEKIEPREPNLEPM	bio ado ado-LEEKIEPREPNLEPM	0.0011291	0.00509212	18	2	0	HU (DAPF)	Quadratic binding equation	2022.06.29.
BIN1	O00499	513-593	SH3	T532M	his6-MBP-TEVsite-SH3	PRRC2C	Q9Y520	704-718	PxxP_8	\N	PSSSTVPPPPHRPLY	bio ado ado-PSSSTVPPPPHRPLY	-0.00665713	0.00379479	18	2	0	HU (DAPF)	Quadratic binding equation	2022.06.29.
BIN1	O00499	513-593	SH3	T532M	his6-MBP-TEVsite-SH3	RB1	P06400	244-258	PxxP_1	\N	IPINGSPRTPRRGQN	bio ado ado-IPINGSPRTPRRGQN	0.0424149	0.046377	18	2	0	HU (DAPF)	Quadratic binding equation	2022.06.29.
BIN1	O00499	513-593	SH3	T532M	his6-MBP-TEVsite-SH3	RB1	P06400	365-379	PxxP_2	\N	EVNVIPPHTPVRTVM	bio ado ado-EVNVIPPHTPVRTVM	0.0321055	0.010824	18	2	0	HU (DAPF)	Quadratic binding equation	2022.06.29.
BIN1	O00499	513-593	SH3	T532M	his6-MBP-TEVsite-SH3	RB1	P06400	780-794	PxxP_3	\N	SPIPHIPRSPYKFPS	bio ado ado-SPIPHIPRSPYKFPS	0.0227323	0.0115346	18	2	0	HU (DAPF)	Quadratic binding equation	2022.06.29.
BIN1	O00499	513-593	SH3	T532M	his6-MBP-TEVsite-SH3	RB1	P06400	787-801	PxxP_4	\N	RSPYKFPSSPLRIPG	bio ado ado-RSPYKFPSSPLRIPG	-0.0245095	0.0397732	18	2	0	HU (DAPF)	Quadratic binding equation	2022.06.29.
BIN1	O00499	513-593	SH3	T532M	his6-MBP-TEVsite-SH3	RB1	P06400	862-876	PxxP_5	\N	SAEGSNPPKPLKKLR	bio ado ado-SAEGSNPPKPLKKLR	0.0243002	0.0561968	18	2	0	HU (DAPF)	Quadratic binding equation	2022.06.29.
BIN1	O00499	513-593	SH3	T532M	his6-MBP-TEVsite-SH3	SH3KBP1	Q96B97	360-374	PxxP_1	\N	EIKKIPPERPEMLPN	bio ado ado-EIKKIPPERPEMLPN	0.00146403	0.0453543	18	2	0	HU (DAPF)	Quadratic binding equation	2022.06.29.
BIN1	O00499	513-593	SH3	T532M	his6-MBP-TEVsite-SH3	SH3KBP1	Q96B97	390-404	PxxP_2	\N	LQKPSVPAIPPKKPR	bio ado ado-LQKPSVPAIPPKKPR	0.355387	0.0157329	18	2	4.52186	HU (DAPF)	Quadratic binding equation	2022.06.29.
BIN1	O00499	513-593	SH3	T532M	his6-MBP-TEVsite-SH3	SH3KBP1	Q96B97	413-427	PxxP_3	\N	RPGALPPRRPERPVG	bio ado ado-RPGALPPRRPERPVG	0.0429332	0.0231121	18	2	0	HU (DAPF)	Quadratic binding equation	2022.06.29.
BIN1	O00499	513-593	SH3	T532M	his6-MBP-TEVsite-SH3	SMCHD1	A6NHR9	1139-1153	PxxP_1	\N	FTVRPLPDEPKHLKC	bio ado ado-FTVRPLPDEPKHLKC	-0.0365962	0.0960707	18	2	0	HU (DAPF)	Quadratic binding equation	2022.06.29.
BIN1	O00499	513-593	SH3	T532M	his6-MBP-TEVsite-SH3	SMCHD1	A6NHR9	1977-1991	PxxP_2	\N	VETTDCPVPPKRMRR	bio ado ado-VETTDCPVPPKRMRR	0.843936	0.00276847	18	2	5.56793	HU (DAPF)	Quadratic binding equation	2022.06.29.
BIN1	O00499	513-593	SH3	T532M	his6-MBP-TEVsite-SH3	SMCHD1	A6NHR9	437-451	PxxP_3	\N	ETYPDDPCFPSKLKD	bio ado ado-ETYPDDPCFPSKLKD	0.0131351	0.052517	18	2	0	HU (DAPF)	Quadratic binding equation	2022.06.29.
BIN1	O00499	513-593	SH3	T532M	his6-MBP-TEVsite-SH3	SRRM1	Q8IYB3	327-341	PxxP_1	\N	TPPRRMPPPPRHRRS	bio ado ado-TPPRRMPPPPRHRRS	0.635465	0.0544283	18	2	5.0522	HU (DAPF)	Quadratic binding equation	2022.06.29.
BIN1	O00499	513-593	SH3	T532M	his6-MBP-TEVsite-SH3	SRRM1	Q8IYB3	365-379	PxxP_2	\N	SRSRSPPKKPPKRTS	bio ado ado-SRSRSPPKKPPKRTS	0.459621	0.0398316	18	4	4.72122	HU (DAPF)	Quadratic binding equation	2022.06.29.
BIN1	O00499	513-593	SH3	T532M	his6-MBP-TEVsite-SH3	SRRM1	Q8IYB3	395-409	PxxP_3	\N	PRRRHRPSPPATPPP	bio ado ado-PRRRHRPSPPATPPP	0.415325	0.0193202	18	2	4.63826	HU (DAPF)	Quadratic binding equation	2022.06.29.
BIN1	O00499	513-593	SH3	T532M	his6-MBP-TEVsite-SH3	SRRM1	Q8IYB3	544-558	PxxP_4	\N	GRRRRSPSPPPTRRR	bio ado ado-GRRRRSPSPPPTRRR	0.734214	0.00408454	18	2	5.26337	HU (DAPF)	Quadratic binding equation	2022.06.29.
BIN1	O00499	513-593	SH3	T532M	his6-MBP-TEVsite-SH3	SRRM1	Q8IYB3	557-571	PxxP_5	\N	RRRSPSPAPPPRRRR	bio ado ado-RRRSPSPAPPPRRRR	0.89767	0.00291287	18	2	5.78447	HU (DAPF)	Quadratic binding equation	2022.06.29.
BIN1	O00499	513-593	SH3	T532M	his6-MBP-TEVsite-SH3	SRRM1	Q8IYB3	567-581	PxxP_6	\N	PRRRRTPTPPPRRRT	bio ado ado-PRRRRTPTPPPRRRT	0.892589	0.00586144	18	4	5.76035	HU (DAPF)	Quadratic binding equation	2022.06.29.
BIN1	O00499	513-593	SH3	T532M	his6-MBP-TEVsite-SH3	SRRM1	Q8IYB3	576-590	PxxP_7	\N	PPRRRTPSPPPRRRS	bio ado ado-PPRRRTPSPPPRRRS	0.884445	0.00460406	18	4	5.72365	HU (DAPF)	Quadratic binding equation	2022.06.29.
BIN1	O00499	513-593	SH3	T532M	his6-MBP-TEVsite-SH3	SRRM1	Q8IYB3	600-614	PxxP_8	\N	IQRRYSPSPPPKRRT	bio ado ado-IQRRYSPSPPPKRRT	0.568508	0.0159895	18	4	4.92315	HU (DAPF)	Quadratic binding equation	2022.06.29.
BIN1	O00499	513-593	SH3	T532M	his6-MBP-TEVsite-SH3	SRRM1	Q8IYB3	611-625	PxxP_9	\N	KRRTASPPPPPKRRA	bio ado ado-KRRTASPPPPPKRRA	0.552063	0.0163868	18	2	4.89234	HU (DAPF)	Quadratic binding equation	2022.06.29.
BIN1	O00499	513-593	SH3	T532M	his6-MBP-TEVsite-SH3	SRRM1	Q8IYB3	612-626	PxxP_10	\N	RRTASPPPPPKRRAS	bio ado ado-RRTASPPPPPKRRAS	0.608078	0.0370763	18	2	4.99854	HU (DAPF)	Quadratic binding equation	2022.06.29.
BIN1	O00499	513-593	SH3	T532M	his6-MBP-TEVsite-SH3	SRRM1	Q8IYB3	621-635	PxxP_11	\N	PKRRASPSPPPKRRV	bio ado ado-PKRRASPSPPPKRRV	0.587973	0.0582639	18	4	4.95997	HU (DAPF)	Quadratic binding equation	2022.06.29.
BIN1	O00499	513-593	SH3	T532M	his6-MBP-TEVsite-SH3	SRRM1	Q8IYB3	759-773	PxxP_12	\N	PAAKKPPAPPSPVQS	bio ado ado-PAAKKPPAPPSPVQS	0.00377465	0.0511813	18	2	0	HU (DAPF)	Quadratic binding equation	2022.06.29.
BIN1	O00499	513-593	SH3	T532M	his6-MBP-TEVsite-SH3	SRRM1	Q8IYB3	776-790	PxxP_13	\N	PSTNWSPAVPVKKAK	bio ado ado-PSTNWSPAVPVKKAK	0.0318092	0.00238353	18	2	0	HU (DAPF)	Quadratic binding equation	2022.06.29.
BIN1	O00499	513-593	SH3	T532M	his6-MBP-TEVsite-SH3	SRRM2	Q9UQ35	1405-1419	PxxP_1	\N	PVLDAVPRTPSRERS	bio ado ado-PVLDAVPRTPSRERS	0.0277595	0.00130968	18	2	0	HU (DAPF)	Quadratic binding equation	2022.06.29.
BIN1	O00499	513-593	SH3	T532M	his6-MBP-TEVsite-SH3	SRRM2	Q9UQ35	1426-1440	PxxP_2	\N	EMKDGLPRTPSRRSR	bio ado ado-EMKDGLPRTPSRRSR	0.512598	0.013908	18	2	4.81914	HU (DAPF)	Quadratic binding equation	2022.06.29.
BIN1	O00499	513-593	SH3	T532M	his6-MBP-TEVsite-SH3	SRRM2	Q9UQ35	1464-1478	PxxP_3	\N	PGMKDIPRTPSRGRS	bio ado ado-PGMKDIPRTPSRGRS	0.110747	0.027047	18	4	3.85085	HU (DAPF)	Quadratic binding equation	2022.06.29.
BIN1	O00499	513-593	SH3	T532M	his6-MBP-TEVsite-SH3	SRRM2	Q9UQ35	1484-1498	PxxP_4	\N	PEPKALPQTPRPRSR	bio ado ado-PEPKALPQTPRPRSR	0.180346	0.0498079	18	2	4.10497	HU (DAPF)	Quadratic binding equation	2022.06.29.
BIN1	O00499	513-593	SH3	T532M	his6-MBP-TEVsite-SH3	SRRM2	Q9UQ35	1653-1667	PxxP_5	\N	SSTESSPEHPPKSRT	bio ado ado-SSTESSPEHPPKSRT	0.0210807	0.0156586	18	2	0	HU (DAPF)	Quadratic binding equation	2022.06.29.
BIN1	O00499	513-593	SH3	T532M	his6-MBP-TEVsite-SH3	SRRM2	Q9UQ35	2029-2043	PxxP_6	\N	RSRSRTPLLPRKRSR	bio ado ado-RSRSRTPLLPRKRSR	0.626393	0.00421783	18	2	5.03426	HU (DAPF)	Quadratic binding equation	2022.06.29.
BIN1	O00499	513-593	SH3	T532M	his6-MBP-TEVsite-SH3	SRRM2	Q9UQ35	2405-2419	PxxP_7	\N	ARSRTPPSAPSQSRM	bio ado ado-ARSRTPPSAPSQSRM	0.0373679	0.0354396	18	2	0	HU (DAPF)	Quadratic binding equation	2022.06.29.
BIN1	O00499	513-593	SH3	T532M	his6-MBP-TEVsite-SH3	SRRM2	Q9UQ35	2656-2670	PxxP_8	\N	PQALPKPASPKKPPP	bio ado ado-PQALPKPASPKKPPP	-0.0244218	0.00339815	18	2	0	HU (DAPF)	Quadratic binding equation	2022.06.29.
BIN1	O00499	513-593	SH3	T532M	his6-MBP-TEVsite-SH3	SRRM2	Q9UQ35	400-414	PxxP_9	\N	TRDRSPPKSPEKLPQ	bio ado ado-TRDRSPPKSPEKLPQ	-0.0390859	0.0665029	18	4	0	HU (DAPF)	Quadratic binding equation	2022.06.29.
BIN1	O00499	513-593	SH3	T532M	his6-MBP-TEVsite-SH3	SRRM2	Q9UQ35	975-989	PxxP_10	\N	PDTKVKPETPPRQSH	bio ado ado-PDTKVKPETPPRQSH	0.154014	0.0115623	18	4	4.02005	HU (DAPF)	Quadratic binding equation	2022.06.29.
BIN1	O00499	513-593	SH3	T532M	his6-MBP-TEVsite-SH3	SUB1	P53999	27-41	PxxP_1	\N	RKKQVAPEKPVKKQK	bio ado ado-RKKQVAPEKPVKKQK	0.0672378	0.0941334	18	2	3.60911	HU (DAPF)	Quadratic binding equation	2022.06.29.
BIN1	O00499	513-593	SH3	T532M	his6-MBP-TEVsite-SH3	TTF2	Q9UNY4	401-415	PxxP_1	\N	VSKKVEPSDPVARRV	bio ado ado-VSKKVEPSDPVARRV	0.0171227	0.000621297	18	2	0	HU (DAPF)	Quadratic binding equation	2022.06.29.
BIN1	O00499	513-593	SH3	T532M	his6-MBP-TEVsite-SH3	TUBGCP2	Q9BSJ2	876-890	PxxP_1	\N	RSQKATPQVPVLRGP	bio ado ado-RSQKATPQVPVLRGP	0.0255099	0.0474857	18	2	0	HU (DAPF)	Quadratic binding equation	2022.06.29.
BIN1	O00499	513-593	SH3	T532M	his6-MBP-TEVsite-SH3	ZC3H14	Q6PJT7	329-343	PxxP_1	\N	SSSVSVPAKPERRPS	bio ado ado-SSSVSVPAKPERRPS	0.0813424	0.0279672	18	2	3.69981	HU (DAPF)	Quadratic binding equation	2022.06.29.
PRMT2	P55345	24-96	SH3	\N	his6-MBP-TEVsite-SH3	ACAP1	Q15027	534-548	PxxP_1	\N	GRPRGQPPVPPKPSI	bio ado ado-GRPRGQPPVPPKPSI	0.0205522	0.0166971	18	4	0	HU (DAPF)	Quadratic binding equation	2022.06.29.
PRMT2	P55345	24-96	SH3	\N	his6-MBP-TEVsite-SH3	ACAP1	Q15027	553-567	PxxP_2	\N	GSLRSKPEPPSEDLG	bio ado ado-GSLRSKPEPPSEDLG	-0.021948	0.0154394	18	2	0	HU (DAPF)	Quadratic binding equation	2022.06.29.
PRMT2	P55345	24-96	SH3	\N	his6-MBP-TEVsite-SH3	ARHGAP17	Q68EM7	632-646	PxxP_1	\N	AVKKPAPAPPKPGNP	bio ado ado-AVKKPAPAPPKPGNP	0.0121911	0.00668941	18	2	0	HU (DAPF)	Quadratic binding equation	2022.06.29.
PRMT2	P55345	24-96	SH3	\N	his6-MBP-TEVsite-SH3	ARHGAP17	Q68EM7	662-676	PxxP_2	\N	HPPSLSPKPPTRSPS	bio ado ado-HPPSLSPKPPTRSPS	0.0114899	0.0273762	18	2	0	HU (DAPF)	Quadratic binding equation	2022.06.29.
PRMT2	P55345	24-96	SH3	\N	his6-MBP-TEVsite-SH3	ARHGAP17	Q68EM7	765-779	PxxP_3	\N	PLGKQNPSLPAPQTL	bio ado ado-PLGKQNPSLPAPQTL	-0.0201968	0.00884001	18	2	0	HU (DAPF)	Quadratic binding equation	2022.06.29.
PRMT2	P55345	24-96	SH3	\N	his6-MBP-TEVsite-SH3	ARHGAP17	Q68EM7	801-815	PxxP_4	\N	PKPRNRPSVPPPPQP	bio ado ado-PKPRNRPSVPPPPQP	0.0402043	0.0258902	18	2	0	HU (DAPF)	Quadratic binding equation	2022.06.29.
PRMT2	P55345	24-96	SH3	\N	his6-MBP-TEVsite-SH3	ARHGAP45	Q92619	1106-1120	PxxP_1	\N	NNVLQAPLPPMRLRG	bio ado ado-NNVLQAPLPPMRLRG	-0.0223081	0.00229275	18	2	0	HU (DAPF)	Quadratic binding equation	2022.06.29.
PRMT2	P55345	24-96	SH3	\N	his6-MBP-TEVsite-SH3	ARHGAP45	Q92619	681-695	PxxP_2	\N	ELPVAVPSGPFRHEG	bio ado ado-ELPVAVPSGPFRHEG	-0.0129137	0.013553	18	2	0	HU (DAPF)	Quadratic binding equation	2022.06.29.
PRMT2	P55345	24-96	SH3	\N	his6-MBP-TEVsite-SH3	BUD13	Q9BRD0	194-208	PxxP_1	\N	RHDSPDPSPPRRPQH	bio ado ado-RHDSPDPSPPRRPQH	0.00166925	0.0503778	18	2	0	HU (DAPF)	Quadratic binding equation	2022.06.29.
PRMT2	P55345	24-96	SH3	\N	his6-MBP-TEVsite-SH3	BUD13	Q9BRD0	219-233	PxxP_2	\N	RHDSPDPSPPRRARH	bio ado ado-RHDSPDPSPPRRARH	-0.0034262	0.0185192	18	2	0	HU (DAPF)	Quadratic binding equation	2022.06.29.
PRMT2	P55345	24-96	SH3	\N	his6-MBP-TEVsite-SH3	C1orf122	Q6ZSJ8	25-39	PxxP_1	\N	GLGGRPPPQPPREER	bio ado ado-GLGGRPPPQPPREER	0.00143681	0.00273046	18	2	0	HU (DAPF)	Quadratic binding equation	2022.06.29.
PRMT2	P55345	24-96	SH3	\N	his6-MBP-TEVsite-SH3	C1orf122	Q6ZSJ8	26-40	PxxP_2	\N	LGGRPPPQPPREERA	bio ado ado-LGGRPPPQPPREERA	-0.00306534	0.0142837	18	2	0	HU (DAPF)	Quadratic binding equation	2022.06.29.
PRMT2	P55345	24-96	SH3	\N	his6-MBP-TEVsite-SH3	CBL	P22681	488-502	PxxP_1	\N	APQASLPPVPPRLDL	bio ado ado-APQASLPPVPPRLDL	0.00576621	0.00586186	18	2	0	HU (DAPF)	Quadratic binding equation	2022.06.29.
PRMT2	P55345	24-96	SH3	\N	his6-MBP-TEVsite-SH3	CBL	P22681	528-542	PxxP_2	\N	HKDKPLPVPPTLRDL	bio ado ado-HKDKPLPVPPTLRDL	0.004374	0.0353024	18	2	0	HU (DAPF)	Quadratic binding equation	2022.06.29.
PRMT2	P55345	24-96	SH3	\N	his6-MBP-TEVsite-SH3	CBL	P22681	537-551	PxxP_3	\N	PTLRDLPPPPPPDRP	bio ado ado-PTLRDLPPPPPPDRP	0.0999544	0.027952	18	2	3.80002	HU (DAPF)	Quadratic binding equation	2022.06.29.
PRMT2	P55345	24-96	SH3	\N	his6-MBP-TEVsite-SH3	CBL	P22681	539-553	PxxP_4	\N	LRDLPPPPPPDRPYS	bio ado ado-LRDLPPPPPPDRPYS	0.0794662	0.0321506	18	2	3.68861	HU (DAPF)	Quadratic binding equation	2022.06.29.
PRMT2	P55345	24-96	SH3	\N	his6-MBP-TEVsite-SH3	CBL	P22681	560-574	PxxP_5	\N	PQRRPLPCTPGDCPS	bio ado ado-PQRRPLPCTPGDCPS	-0.0666563	0.0747691	18	2	0	HU (DAPF)	Quadratic binding equation	2022.06.29.
PRMT2	P55345	24-96	SH3	\N	his6-MBP-TEVsite-SH3	CBL	P22681	590-604	PxxP_6	\N	WLPRPIPKVPVSAPS	bio ado ado-WLPRPIPKVPVSAPS	0.016312	0.0260286	18	2	0	HU (DAPF)	Quadratic binding equation	2022.06.29.
PRMT2	P55345	24-96	SH3	\N	his6-MBP-TEVsite-SH3	CBL	P22681	814-828	PxxP_7	\N	TEGSQVPERPPKPFP	bio ado ado-TEGSQVPERPPKPFP	0.0122582	0.0380218	18	2	0	HU (DAPF)	Quadratic binding equation	2022.06.29.
PRMT2	P55345	24-96	SH3	\N	his6-MBP-TEVsite-SH3	CDC27	P30260	396-410	PxxP_1	\N	LKMKFPPKIPNRKTK	bio ado ado-LKMKFPPKIPNRKTK	0.0110844	0.032136	18	4	0	HU (DAPF)	Quadratic binding equation	2022.06.29.
PRMT2	P55345	24-96	SH3	\N	his6-MBP-TEVsite-SH3	DDX42	Q86XP3	183-197	PxxP_1	\N	YDSDGNPIAPTKKII	bio ado ado-YDSDGNPIAPTKKII	-0.0110493	0.0119483	18	2	0	HU (DAPF)	Quadratic binding equation	2022.06.29.
PRMT2	P55345	24-96	SH3	\N	his6-MBP-TEVsite-SH3	DDX42	Q86XP3	23-37	PxxP_2	\N	AGKKEEPKLPQQSHS	bio ado ado-AGKKEEPKLPQQSHS	-0.029207	0.0369185	18	2	0	HU (DAPF)	Quadratic binding equation	2022.06.29.
PRMT2	P55345	24-96	SH3	\N	his6-MBP-TEVsite-SH3	DDX42	Q86XP3	920-934	PxxP_3	\N	ADGFAVPEPPKRKKS	bio ado ado-ADGFAVPEPPKRKKS	-0.00664352	0.00023363	18	2	0	HU (DAPF)	Quadratic binding equation	2022.06.29.
PRMT2	P55345	24-96	SH3	\N	his6-MBP-TEVsite-SH3	DMBT1	Q9UGM3	215-229	PxxP_1	\N	WPVRISPPVPTEGSE	bio ado ado-WPVRISPPVPTEGSE	-0.0146851	0.0119592	18	2	0	HU (DAPF)	Quadratic binding equation	2022.06.29.
PRMT2	P55345	24-96	SH3	\N	his6-MBP-TEVsite-SH3	DNM2	P50570	313-327	PxxP_1	\N	EYKNFRPDDPTRKTK	bio ado ado-EYKNFRPDDPTRKTK	-0.01093	0.011898	18	2	0	HU (DAPF)	Quadratic binding equation	2022.06.29.
PRMT2	P55345	24-96	SH3	\N	his6-MBP-TEVsite-SH3	DNM2	P50570	801-815	PxxP_2	\N	AASFSAPPIPSRPGP	bio ado ado-AASFSAPPIPSRPGP	-0.00488032	0.0323444	18	2	0	HU (DAPF)	Quadratic binding equation	2022.06.29.
PRMT2	P55345	24-96	SH3	\N	his6-MBP-TEVsite-SH3	DNM2	P50570	823-837	PxxP_3	\N	DLFPAPPQIPSRPVR	bio ado ado-DLFPAPPQIPSRPVR	0.0561613	0.061789	18	2	3.52472	HU (DAPF)	Quadratic binding equation	2022.06.29.
PRMT2	P55345	24-96	SH3	\N	his6-MBP-TEVsite-SH3	DNM2	P50570	826-840	PxxP_4	\N	PAPPQIPSRPVRIPP	bio ado ado-PAPPQIPSRPVRIPP	0.0121963	0.0236227	18	2	0	HU (DAPF)	Quadratic binding equation	2022.06.29.
PRMT2	P55345	24-96	SH3	\N	his6-MBP-TEVsite-SH3	DNM2	P50570	834-848	PxxP_5	\N	RPVRIPPGIPPGVPS	bio ado ado-RPVRIPPGIPPGVPS	0.0273613	0.0224375	18	2	0	HU (DAPF)	Quadratic binding equation	2022.06.29.
PRMT2	P55345	24-96	SH3	\N	his6-MBP-TEVsite-SH3	DNM2	P50570	838-852	PxxP_6	\N	IPPGIPPGVPSRRPP	bio ado ado-IPPGIPPGVPSRRPP	0.0175365	0.0147778	18	2	0	HU (DAPF)	Quadratic binding equation	2022.06.29.
PRMT2	P55345	24-96	SH3	\N	his6-MBP-TEVsite-SH3	DNM2	P50570	846-860	PxxP_7	\N	VPSRRPPAAPSRPTI	bio ado ado-VPSRRPPAAPSRPTI	0.0469385	0.0359099	18	4	0	HU (DAPF)	Quadratic binding equation	2022.06.29.
PRMT2	P55345	24-96	SH3	\N	his6-MBP-TEVsite-SH3	DNMT1	P26358	129-143	PxxP_1	\N	PKPLSKPRTPRRSKS	bio ado ado-PKPLSKPRTPRRSKS	0.0177396	0.0154465	18	2	0	HU (DAPF)	Quadratic binding equation	2022.06.29.
PRMT2	P55345	24-96	SH3	\N	his6-MBP-TEVsite-SH3	DNMT1	P26358	323-337	PxxP_2	\N	KRRKTTPKEPTEKKM	bio ado ado-KRRKTTPKEPTEKKM	-0.00279846	0.0131601	18	2	0	HU (DAPF)	Quadratic binding equation	2022.06.29.
PRMT2	P55345	24-96	SH3	\N	his6-MBP-TEVsite-SH3	EZH2	Q15910	341-355	PxxP_1	\N	ERIKTPPKRPGGRRR	bio ado ado-ERIKTPPKRPGGRRR	0.0738053	0.00940507	18	2	3.65329	HU (DAPF)	Quadratic binding equation	2022.06.29.
PRMT2	P55345	24-96	SH3	\N	his6-MBP-TEVsite-SH3	G3BP1	Q13283	288-302	PxxP_1	\N	PESQIPPQRPQRDQR	bio ado ado-PESQIPPQRPQRDQR	-0.0040384	0.0109238	18	2	0	HU (DAPF)	Quadratic binding equation	2022.06.29.
PRMT2	P55345	24-96	SH3	\N	his6-MBP-TEVsite-SH3	HDGFL2	Q7Z4V5	288-302	PxxP_1	\N	RGRKPKPERPPSSSS	bio ado ado-RGRKPKPERPPSSSS	-0.0291811	0.000464401	18	2	0	HU (DAPF)	Quadratic binding equation	2022.06.29.
PRMT2	P55345	24-96	SH3	\N	his6-MBP-TEVsite-SH3	HIRIP3	Q9BW71	531-545	PxxP_1	\N	DEERPRPAPPDWSHM	bio ado ado-DEERPRPAPPDWSHM	0.046744	0.00384115	18	2	0	HU (DAPF)	Quadratic binding equation	2022.06.29.
PRMT2	P55345	24-96	SH3	\N	his6-MBP-TEVsite-SH3	HMGA1	P17096	28-42	PxxP_1	\N	RPRKQPPVSPGTALV	bio ado ado-RPRKQPPVSPGTALV	0.015252	0.00243188	18	2	0	HU (DAPF)	Quadratic binding equation	2022.06.29.
PRMT2	P55345	24-96	SH3	\N	his6-MBP-TEVsite-SH3	HNRNPK	P61978	266-280	PxxP_1	\N	PGRGGRPMPPSRRDY	bio ado ado-PGRGGRPMPPSRRDY	-0.0663643	0.0690856	18	2	0	HU (DAPF)	Quadratic binding equation	2022.06.29.
PRMT2	P55345	24-96	SH3	\N	his6-MBP-TEVsite-SH3	HNRNPK	P61978	283-297	PxxP_2	\N	MSPRRGPPPPPPGRG	bio ado ado-MSPRRGPPPPPPGRG	0.151153	0.00262217	18	2	4.01015	HU (DAPF)	Quadratic binding equation	2022.06.29.
PRMT2	P55345	24-96	SH3	\N	his6-MBP-TEVsite-SH3	HNRNPK	P61978	284-298	PxxP_3	\N	SPRRGPPPPPPGRGG	bio ado ado-SPRRGPPPPPPGRGG	0.182985	0.0450942	18	2	4.11294	HU (DAPF)	Quadratic binding equation	2022.06.29.
PRMT2	P55345	24-96	SH3	\N	his6-MBP-TEVsite-SH3	HNRNPK	P61978	285-299	PxxP_4	\N	PRRGPPPPPPGRGGR	bio ado ado-PRRGPPPPPPGRGGR	0.231416	0.0157756	18	2	4.24636	HU (DAPF)	Quadratic binding equation	2022.06.29.
PRMT2	P55345	24-96	SH3	\N	his6-MBP-TEVsite-SH3	HNRNPK	P61978	302-316	PxxP_5	\N	SRARNLPLPPPPPPR	bio ado ado-SRARNLPLPPPPPPR	0.365506	0.0189481	18	2	4.54198	HU (DAPF)	Quadratic binding equation	2022.06.29.
PRMT2	P55345	24-96	SH3	\N	his6-MBP-TEVsite-SH3	HNRNPK	P61978	305-319	PxxP_6	\N	RNLPLPPPPPPRGGD	bio ado ado-RNLPLPPPPPPRGGD	0.112484	0.0186285	18	2	3.85864	HU (DAPF)	Quadratic binding equation	2022.06.29.
PRMT2	P55345	24-96	SH3	\N	his6-MBP-TEVsite-SH3	IRF2BP1	Q8IU81	361-375	PxxP_1	\N	ALCGPPPRAPSRNLA	bio ado ado-ALCGPPPRAPSRNLA	0.0497135	0.00404493	18	2	0	HU (DAPF)	Quadratic binding equation	2022.06.29.
PRMT2	P55345	24-96	SH3	\N	his6-MBP-TEVsite-SH3	KHDRBS1	Q07666	32-46	PxxP_1	\N	QTPSRQPPLPHRSRG	bio ado ado-QTPSRQPPLPHRSRG	0.033774	0.0547631	18	2	0	HU (DAPF)	Quadratic binding equation	2022.06.29.
PRMT2	P55345	24-96	SH3	\N	his6-MBP-TEVsite-SH3	KHDRBS1	Q07666	328-342	PxxP_2	\N	TVTRGVPPPPTVRGA	bio ado ado-TVTRGVPPPPTVRGA	0.0202805	0.00582143	18	2	0	HU (DAPF)	Quadratic binding equation	2022.06.29.
PRMT2	P55345	24-96	SH3	\N	his6-MBP-TEVsite-SH3	KHDRBS1	Q07666	421-435	PxxP_3	\N	PSLKAPPARPVKGAY	bio ado ado-PSLKAPPARPVKGAY	0.0121662	0.0152865	18	4	0	HU (DAPF)	Quadratic binding equation	2022.06.29.
PRMT2	P55345	24-96	SH3	\N	his6-MBP-TEVsite-SH3	MKI67	P46013	1083-1097	PxxP_1	\N	TGMKKWPRTPKEEAQ	bio ado ado-TGMKKWPRTPKEEAQ	0.0210257	0.0252648	18	2	0	HU (DAPF)	Quadratic binding equation	2022.06.29.
PRMT2	P55345	24-96	SH3	\N	his6-MBP-TEVsite-SH3	MKI67	P46013	1327-1341	PxxP_2	\N	TGSKRRPQTPKEEAQ	bio ado ado-TGSKRRPQTPKEEAQ	0.000281661	0.00914667	18	2	0	HU (DAPF)	Quadratic binding equation	2022.06.29.
PRMT2	P55345	24-96	SH3	\N	his6-MBP-TEVsite-SH3	MKI67	P46013	1385-1399	PxxP_3	\N	TSTRRQPKTPLEKRD	bio ado ado-TSTRRQPKTPLEKRD	0.00594789	0.0163674	18	2	0	HU (DAPF)	Quadratic binding equation	2022.06.29.
PRMT2	P55345	24-96	SH3	\N	his6-MBP-TEVsite-SH3	MKI67	P46013	1935-1949	PxxP_4	\N	PGSKRRPQTPKEKAK	bio ado ado-PGSKRRPQTPKEKAK	0.0175251	0.0484285	18	2	0	HU (DAPF)	Quadratic binding equation	2022.06.29.
PRMT2	P55345	24-96	SH3	\N	his6-MBP-TEVsite-SH3	MKI67	P46013	2115-2129	PxxP_5	\N	TSTRRRPKTPLGKRD	bio ado ado-TSTRRRPKTPLGKRD	0.00943461	0.0646554	18	2	0	HU (DAPF)	Quadratic binding equation	2022.06.29.
PRMT2	P55345	24-96	SH3	\N	his6-MBP-TEVsite-SH3	MKI67	P46013	2175-2189	PxxP_6	\N	TGSKRQPRTPKGKAQ	bio ado ado-TGSKRQPRTPKGKAQ	-0.0211568	0.00261764	18	2	0	HU (DAPF)	Quadratic binding equation	2022.06.29.
PRMT2	P55345	24-96	SH3	\N	his6-MBP-TEVsite-SH3	MKI67	P46013	2297-2311	PxxP_7	\N	PGSKRWPQTPKEKAQ	bio ado ado-PGSKRWPQTPKEKAQ	-0.0181834	0.0239743	18	2	0	HU (DAPF)	Quadratic binding equation	2022.06.29.
PRMT2	P55345	24-96	SH3	\N	his6-MBP-TEVsite-SH3	MKI67	P46013	2418-2432	PxxP_8	\N	PGSKRQPQTPKEKAE	bio ado ado-PGSKRQPQTPKEKAE	-0.0279019	0.00341294	18	2	0	HU (DAPF)	Quadratic binding equation	2022.06.29.
PRMT2	P55345	24-96	SH3	\N	his6-MBP-TEVsite-SH3	MKI67	P46013	2660-2674	PxxP_9	\N	EPSRRRPRAPKEKAQ	bio ado ado-EPSRRRPRAPKEKAQ	0.0236606	0.00265598	18	2	0	HU (DAPF)	Quadratic binding equation	2022.06.29.
PRMT2	P55345	24-96	SH3	\N	his6-MBP-TEVsite-SH3	MKI67	P46013	2781-2795	PxxP_10	\N	TGSRRRPRAPRESAQ	bio ado ado-TGSRRRPRAPRESAQ	-0.0197072	0.0128471	18	2	0	HU (DAPF)	Quadratic binding equation	2022.06.29.
PRMT2	P55345	24-96	SH3	\N	his6-MBP-TEVsite-SH3	MKI67	P46013	2899-2913	PxxP_11	\N	IGSRRQPRAPKEKAQ	bio ado ado-IGSRRQPRAPKEKAQ	0.000735265	0.0315316	18	2	0	HU (DAPF)	Quadratic binding equation	2022.06.29.
PRMT2	P55345	24-96	SH3	\N	his6-MBP-TEVsite-SH3	MKI67	P46013	2986-3000	PxxP_12	\N	KSNTSLPPLPFKRGG	bio ado ado-KSNTSLPPLPFKRGG	0.00900375	0.0253363	18	2	0	HU (DAPF)	Quadratic binding equation	2022.06.29.
PRMT2	P55345	24-96	SH3	\N	his6-MBP-TEVsite-SH3	MKI67	P46013	517-531	PxxP_13	\N	FDENLPPNTPLKRGE	bio ado ado-FDENLPPNTPLKRGE	-0.0542015	0.041919	18	2	0	HU (DAPF)	Quadratic binding equation	2022.06.29.
PRMT2	P55345	24-96	SH3	\N	his6-MBP-TEVsite-SH3	MKI67	P46013	686-700	PxxP_14	\N	NKRQRRPATPKKPVG	bio ado ado-NKRQRRPATPKKPVG	0.00999479	0.0238245	18	2	0	HU (DAPF)	Quadratic binding equation	2022.06.29.
PRMT2	P55345	24-96	SH3	\N	his6-MBP-TEVsite-SH3	MUC5AC	P98088	1311-1325	PxxP_1	\N	IERRVYPCSPTTPVP	bio ado ado-IERRVYPCSPTTPVP	0.0414917	0.000124145	18	2	0	HU (DAPF)	Quadratic binding equation	2022.06.29.
PRMT2	P55345	24-96	SH3	\N	his6-MBP-TEVsite-SH3	MUC5AC	P98088	1563-1577	PxxP_2	\N	VSSKPTPTEPSTSSC	bio ado ado-VSSKPTPTEPSTSSC	0.0660967	0.0233419	18	2	3.60103	HU (DAPF)	Quadratic binding equation	2022.06.29.
PRMT2	P55345	24-96	SH3	\N	his6-MBP-TEVsite-SH3	MUC5AC	P98088	1936-1950	PxxP_3	\N	VSSKPTPTEPSTSSC	bio ado ado-VSSKPTPTEPSTSSC	0.0236293	0.0458859	18	2	0	HU (DAPF)	Quadratic binding equation	2022.06.29.
PRMT2	P55345	24-96	SH3	\N	his6-MBP-TEVsite-SH3	MUC5AC	P98088	5643-5657	PxxP_4	\N	SWERGVPVSPMH---	bio ado ado-SWERGVPVSPMH---	-0.00296488	0.0547442	18	2	0	HU (DAPF)	Quadratic binding equation	2022.06.29.
PRMT2	P55345	24-96	SH3	\N	his6-MBP-TEVsite-SH3	NOLC1	Q14978	193-207	PxxP_1	\N	KAQTKAPPKPARAAP	bio ado ado-KAQTKAPPKPARAAP	0.000382025	0.00749026	18	2	0	HU (DAPF)	Quadratic binding equation	2022.06.29.
PRMT2	P55345	24-96	SH3	\N	his6-MBP-TEVsite-SH3	PKN1	Q16512	565-579	PxxP_1	\N	KSSRDPPSSPSSLSS	bio ado ado-KSSRDPPSSPSSLSS	0.0100338	0.0232245	18	2	0	HU (DAPF)	Quadratic binding equation	2022.06.29.
[truncated: 5,488 more rows]
